# Supplementary material for: High-throughput functional comparison of promoter and enhancer activities
Source: HighWire-hosted journal article supplement (doi:10.1101/gr.204834.116), 2016-06-16
Supplement: Supplemental_Table_S1.xlsx [file Supplemental_Table_S1.xlsx]

## Sheet: TN03
label	Un1_E	KCl1_E	Un2_E	KCl2_E	DNA_E	Un1_P	KCl1_P	Un2_P	KCl2_P	DNA_P	eid	seq	species	locus	negCntl	ActivKCl1_P	ActivKCl2_P	true_center	ortholog_locus	tss_dist	tss_strand	tss_gene	GC	CpG	ActivKCl1_E	ActivKCl2_E	ActivUn1_P	ActivUn2_P	ActivUn1_E	ActivUn2_E	maxE	maxP	emP_max_P	emP_max_E	emP_max_P_negs	emP_max_E_negs	q_max_P	q_max_E	q_max_P_negs	q_max_E_negs	Activmax_Promoter_0.01_FDR	Activmax_Enhancer_0.01_FDR	RFXpwm	CREpwm	AP1pwm	notActive
mm_Endogenous_chr19:45635100	4146	933	2931	3468	642	8750	3453	10515	4061	2583	255361659	AAAAAAAATCAGTTCCCAGAATACTTCCCGGGTCATCCGGAAGTGATCATCGGTCGGGTAGTTGCCATGGCAGTGGCCCGGCGCGTTCCTGGGCGGAGGGAAGATGGCGGTGACTAGCTGGTTGGAGGTTTTGCGGTC	mm	chr19:45635100	FALSE	1.96098	1.93064	chr19:45635100	chr10:103348072	-4	+	Dpcd	0.572464	0.0724638	1.17632	2.66892	4.89097	5.56016	6.36587	3.97411	5.16999	5.22556	0	0	1	1	0	0	1	1	TRUE	TRUE	1	0	0	FALSE
hs_Sliding_topH3K27Ac_slide_-60_chr6:3454544	88	61	62	206	94	258	196	288	273	316	666565800	AAAACATGCCACACACATGAGGGCTGTCTGTGACCCTCTCGAATGCTAATTTAGAAAAACTGCCCAGCTCTCCAATATGCCTCCATAGTCTGCTTTTAAGAACTATTTTTGTTCTCTCCTCCCACCGTGCATGGCTGA	hs	chr6:3454544	FALSE	0.909852	1.06089	chr6:3454484	chr13:34434280	NA	+	uc003mvs.1	0.456522	0.0144928	0.525269	1.08276	1.17881	1.24482	0.922823	0.574147	0.804012	1.21182	0.242972	0.777108	0.757028	0.222892	0.622015	0.921206	1	1	FALSE	FALSE	0	0	0	TRUE
mm_Sliding_topH3K27Ac_slide_-20_chr13:77035860	33	25	29	60	57	76	78	73	111	600	1202876686	AAAACTAACTTAGACCACAAGTCTTCTGTGTTTGCATCTCAGTACCAAAAAAGACCACATATTCAGTGCTCTTAACAGAAGCAGCTCTGAGTCACACAGCCTCTAAACATATCTAAAAATGGATGATCACTCTTTTCT	mm	chr13:77035860	FALSE	0.190698	0.227177	chr13:77035840	chr5:94129154	-38603	+	ENSMUSG00000090119	0.376812	0	0.355013	0.520077	0.182883	0.166178	0.570693	0.442876	0.506785	0.208937	1	0.931727	0	0.0682731	1	0.970749	0	1	FALSE	FALSE	0	0	1	TRUE
mm_Sliding_topH3K27Ac_slide_-40_chr1:37134960	159	55	93	255	168	274	333	241	416	522	1345894730	AAAACTACATTTTATTTACTTGAACATCATCAGGTTGCTATGTTTAAAGGAGCAGTCCTGCTCTTGGCAGACACACGTGATCTTTAATTAGACTCTGAGTCTCGTGGCCCATCACTCAGGCCTGGCACCATGCCTCTC	mm	chr1:37134960	FALSE	0.935784	0.978624	chr1:37134920	chr2:98770046	48652	+	ENSMUSG00000050122	0.449275	0.0144928	0.264992	0.749932	0.757864	0.630593	0.932935	0.481873	0.707404	0.957204	0.714859	0.827309	0.285141	0.172691	0.912309	0.933954	1	1	FALSE	FALSE	0	0	0	TRUE
mm_Sliding_topH3K27Ac_slide_-100_chr16:97296955	502	1183	1008	2664	479	483	516	454	641	1037	548912670	AAAACTGAGATGCTACCATAAGGAACCCCTGCGACCCTTCAGGGAATGCCCCAGAGCCAGAGTAGGTATGTGGCCCATCTCTCTCTCCATGGCTATTTGCACGTAAGTGAGATCTGCAGTGAGATATTGTTAGAGTGT	mm	chr16:97296955	FALSE	0.729916	0.759053	chr16:97296855	chr21:42102649	-95587	-	Dscam	0.492754	0.0144928	1.99907	2.74783	0.67248	0.59797	1.03307	1.83183	2.37345	0.744484	0.957831	0.0220884	0.0421687	0.977912	0.989773	0.164489	1	1	FALSE	FALSE	0	0	0	FALSE
mm_Sliding_topH3K27Ac_slide_40_chr4:48055540	393	491	533	999	447	493	769	563	684	1002	169410991	AAAACTGTCAAGTGCTTCTCTACACACCCACCCACCAGATACCATCGCAGCCGGCTGGGGGAGTCTCCCTCTTCTTGCCTGACAGCTTCACTTTCTTTGAGGTCTGGAACTGGTGATCACACTGGTCCGTCATGGTAT	mm	chr4:48055540	FALSE	1.1258	0.838265	chr4:48055580	chr9:102581588	-2404	+	ENSMUSG00000028341	0.528986	0.0217391	0.889106	1.1042	0.71038	0.767438	0.86666	1.03796	0.996655	0.982031	0.672691	0.61245	0.327309	0.38755	0.908104	0.858881	1	1	FALSE	FALSE	0	0	0	TRUE
mm_Sliding_topH3K27Ac_slide_80_chr8:87018800	193	613	240	525	233	416	629	499	553	610	45375621	AAAAGCCCCAGCTAGCAGGAACACGTCACGGGGCTGGAACAGTCAGTGTGAAGTTGGTGTATCTATTTTCAACCTAGAGTTACAAAAATACATTTTCATAAAGATCACGATCCAACTCCTCCCTCCTCCCTCCACCCT	mm	chr8:87018800	FALSE	1.51259	1.11324	chr8:87018880	chr19:13519872	33572	+	uc009mmm.1	0.463768	0.0217391	2.12953	1.11325	0.984634	1.11731	0.816516	0.896632	1.62139	1.31292	0.146586	0.114458	0.853414	0.885542	0.486213	0.396103	1	1	FALSE	FALSE	0	0	0	FALSE
hs_Sliding_topH3K27Ac_slide_40_chr10:38146595	609	630	628	277	214	2963	876	2279	1364	699	2050280881	AAAAGCGCACACGCACACATCAAACGCCATGCGCACGCGCACAACAAACGTCACACGCTACGCACGCGCGTGCTGTCCCCTCCCCGCAGCCAGTTCCCTCCCCTTCGGGCCAGTGCGCATTGCCTACCCCGTGCTACA	hs	chr10:38146595	FALSE	1.83835	2.39624	chr10:38146635	NA	NA	-	ZNF248	0.637681	0.115942	2.3829	0.639524	6.1202	4.45317	2.80522	2.55449	2.67986	5.28669	0	0.0120482	1	0.987952	0	0.106055	1	1	TRUE	TRUE	0	0	0	FALSE
mm_Sliding_topH3K27Ac_slide_-100_chr13:22036970	691	528	970	920	279	657	713	677	887	697	1699425526	AAAAGTAATTCAGAAACACTGCGCGTTGCATTCTGGGAATTGTGGTCCTTTGTGTTCCCCGGTGAGGCGCTCCTGTGTGTTGCGGGGAGGGGGAAACCAAGGGAAAGGGTCTACGCGACCGGAAGTGACCGCTAAGCC	mm	chr13:22036970	FALSE	1.50058	1.56273	chr13:22036870	chr6:27440884	-192	+	Zfp184	0.557971	0.0652174	1.53183	1.6292	1.36096	1.32666	2.44139	3.0264	2.7339	1.53165	0.0562249	0.0120482	0.943775	0.987952	0.296043	0.106055	1	1	FALSE	FALSE	0	0	0	FALSE
mm_Sliding_topH3K27Ac_slide_60_chr11:68908505	153	86	113	161	117	170	208	172	158	231	1655301541	AAAATGTTGAGAGTGGGTGGGGGTGTGGCTTCCGGTCAGATGTCCAATCAACGAGTTGGGGCGCCCCCGCCCTCACGTGGCTCTATCACTACCGGTTGTCATATTGTCCAATGGGAAAATGACTGAGTTCTGAAATGC	mm	chr11:68908505	FALSE	1.32085	0.83992	chr11:68908565	chr17:8059884	-93	+	ENSMUSG00000020893	0.528986	0.0434783	0.594966	0.679878	1.06255	1.017	1.28905	0.840721	1.06488	1.08038	0.463855	0.518072	0.536145	0.481928	0.808958	0.792577	1	1	FALSE	FALSE	0	0	0	TRUE
mm_Sliding_topH3K27Ac_slide_-80_chr10:121062745	47	70	43	131	59	159	184	235	206	233	1254464184	AAACAATGTGGAAAATTCCTCCACACCTACTTAAGCCTGTTTGAGACCGACTGAATCTTTCCAGCCTTTTAACATCAAGTTGACAAGTCGCTTTAATACAACGTAACTTCCCCCAGTAACAACTAATTAAGGCTTCCA	mm	chr10:121062745	FALSE	1.15841	1.08569	chr10:121062665	chr12:64799064	-787	-	Xpot	0.398551	0.0217391	0.960341	1.09701	0.985264	1.37757	0.785253	0.634418	1.02868	1.18142	0.293173	0.560241	0.706827	0.439759	0.680962	0.820174	1	1	FALSE	FALSE	0	0	0	TRUE
mm_Sliding_topH3K27Ac_slide_-40_chr12:99848755	119	65	104	223	87	291	279	307	404	393	258947936	AAACAGATTATTCTACTTCCTTACCCTTAAACTCTTCGTTTGTAATAAACTGCAGTCTACACCATGTGGGTGTTTGAATGTGCTTTAAGACCATGAGTAATTTTCTAAGAATAAAATATCACTGAACTCACAACAGTA	mm	chr12:99848755	FALSE	1.04139	1.26236	chr12:99848715	chr14:88823354	11433	+	ENSMUSG00000089351	0.333333	0.00724638	0.604747	1.26642	1.06908	1.06696	1.34831	1.04057	1.19444	1.15187	0.337349	0.399598	0.662651	0.600402	0.72202	0.71449	1	1	FALSE	FALSE	0	0	1	TRUE
mm_Sliding_topH3K27Ac_slide_-20_chr2:165681500	152	70	114	227	205	383	406	431	401	602	1175034277	AAACAGCCACCACCAGCTGTCTCACAGAGGAATGAATGGTTCACCTTGCATCCAAGAAGTACTTTTTTTTTTCCTCTTCCACCTTCTCTGGACTAGCAGGACACCATTTGCTGGCCCTTCACCAACTTCCTGCCTCCA	mm	chr2:165681500	FALSE	0.989308	0.817976	chr2:165681480	chr20:45944550	-1723	+	ENSMUSG00000085274	0.485507	0	0.276391	0.547095	0.918573	0.977875	0.730892	0.484072	0.607482	0.948224	0.728916	0.89759	0.271084	0.10241	0.922022	0.960948	1	1	FALSE	FALSE	0	0	0	TRUE
mm_Sliding_topH3K27Ac_slide_20_chr7:148749030	1288	1101	1142	3226	743	1496	1539	1612	1882	2449	2065796956	AAACAGCGTGGATTTCTCTTTGGGCGGGGATAGGGACACTATACGTCTCTCGGACCTGATTCAGGCGGCATGTTGGGCGATGATTAGATCTCACCCACTGCGATTAAAGTGACTCATTCCCCCAGGGAACCGGGAGCA	mm	chr7:148749030	FALSE	0.921832	0.943678	chr7:148749050	chr11:926646	992	+	Ap2a2	0.536232	0.057971	1.19944	2.14519	0.881971	0.899039	1.7088	1.33794	1.67232	0.932755	0.763052	0.10241	0.236948	0.89759	0.929525	0.385496	1	1	FALSE	FALSE	0	0	1	FALSE
hs_Sliding_topH3K27Ac_slide_80_chr9:94185332	579	328	509	1525	747	446	402	477	532	692	1582841363	AAACAGGGTGGAAAACGTCTGTGCAGACACAGCCCCTGACACAAACAAACGCCGCGCAGGCATTCTCCGAATGCCGTCACCGTTCACGCTACCAACCCTTTTTCTCACCAAGCAAATTAAGACTATTCCCCATTCCTC	hs	chr9:94185332	FALSE	0.852161	0.944057	chr9:94185412	chr13:53075665	NA	-	NFIL3	0.514493	0.057971	0.355413	1.00865	0.930551	0.941488	0.764049	0.593139	0.682031	0.936019	0.75502	0.84739	0.24498	0.15261	0.929525	0.944601	1	1	FALSE	FALSE	0	1	0	TRUE
mm_Sliding_topH3K27Ac_slide_-20_chr10:126507430	1145	994	983	1458	602	1091	946	1284	885	1035	998964452	AAACCAATTCTCTGCGCCTGCACCGTCCCACCCCTGCTTCTGGATTGGTGAAACTCGTGGCTAATCCAAGACATCCAGGACTTCAATGCCAATCAATCTGCATTACGTCACCAGCCTGCCTCCCAGTCTTGCCCTTAG	mm	chr10:126507430	FALSE	1.34076	1.05002	chr10:126507410	chr12:58138732	-146	+	LOC100504703	0.528986	0.0289855	1.3365	1.19661	1.52193	1.69444	1.87488	1.4214	1.64814	1.60819	0.0421687	0.110442	0.957831	0.889558	0.25442	0.396103	1	1	FALSE	FALSE	0	1	0	FALSE
mm_Sliding_topH3K27Ac_slide_40_chr1:108068110	53	102	49	219	71	286	213	304	207	289	1987184339	AAACCTCCTGGGAAACAGCTCCGCCCCACCCCCGTACGCACGCGTCACGTTTGTTTACCCTGAGGCCCCGCCCCCAGCCTCCCGCTCTCCGCAGAAATGTCGTCATGCTAACGATGCATATTCATGATCAACTCCGCC	mm	chr1:108068110	FALSE	1.08114	0.87956	chr1:108068150	chr18:60382428	89	-	Gm20753	0.601449	0.0869565	1.16284	1.52397	1.42883	1.43674	0.735836	0.600754	1.34341	1.43278	0.0903614	0.271084	0.909639	0.728916	0.391775	0.603625	1	1	FALSE	FALSE	0	1	0	FALSE
hs_Sliding_topH3K27Ac_slide_-40_chr5:136482371	11968	13023	12419	13259	1937	6183	7103	5221	7414	4498	996225394	AAACCTCGTCAAGCTATGAGCAGGAACATTTATTGCAGCTTGTCTGTCCCCATGGTAACCCGTGCATGCATCTTGCCTCCCTTGTCTCCAGAGAGGCTTGTTCACCAGCTGACGACAGAGCCTCTCAGAATATAAAAT	hs	chr5:136482371	FALSE	2.31646	2.02407	chr5:136482331	NA	NA	-	ENSG00000152377	0.485507	0.0217391	5.44203	3.38199	1.98468	1.58539	6.09054	5.58105	5.83579	2.17026	0.0100402	0	0.98996	1	0.106382	0	1	1	FALSE	FALSE	1	1	0	FALSE
mm_Sliding_topH3K27Ac_slide_-60_chr4:129784790	1247	1109	1480	1876	803	2388	2192	2346	2572	2884	225349197	AAACGAGCCACTACGGTCAACAACACTTCCGGACACTCCTACCCAGCCCTCTGTAAGGTACCAGCTCACCGCCTGTGACTTCCGTTTGTTGACCGGAAGATTGACAGCCTGTCCGTCCAATCACAATCGGACCCGCCC	mm	chr4:129784790	FALSE	1.11493	1.09514	chr4:129784730	chr1:32110590	-129	+	Pef1	0.565217	0.0652174	1.11788	1.15427	1.1955	1.11105	1.53079	1.60437	1.56758	1.15328	0.335341	0.134538	0.664659	0.865462	0.72202	0.424903	1	1	FALSE	FALSE	0	0	0	FALSE
mm_Sliding_topH3K27Ac_slide_20_chr1:145975235	132	239	102	524	157	342	419	316	545	459	148661176	AAACTCCTCACACATACTCTCCAATTTTAGATTGAGTTGCTTGGGATGGGCTCTGCTTATGAATCACTTATATGGCAGCGGGTGCTGCCAACTCAAGGCAGACTATATTTACCTTAGCCGTCACGGATCCTTCTCACT	mm	chr1:145975235	FALSE	1.33907	1.45806	chr1:145975255	chr1:192647440	-49130	-	ENSMUSG00000051079	0.456522	0.0217391	1.23219	1.64901	1.07578	0.940322	0.828777	0.565535	1.4406	1.39857	0.0983936	0.198795	0.901606	0.801205	0.396927	0.52343	1	1	FALSE	FALSE	0	0	1	FALSE
hs_Sliding_topH3K27Ac_slide_60_chr1:61577384	47	33	46	68	27	56	45	54	49	73	1798752688	AAACTTTCTGGAGCCCCTCTCACCTCATTAGCATCTGAATCTCTATTCAGCAGTTAATGTCCGTTACTGCTAGAGTGCTCAATTCTTGTTTTCAATAAGCCAGTTGTAAAATGTCAGACTGTCACTTACAATATAAAA	hs	chr1:61577384	FALSE	0.904256	0.824263	chr1:61577444	chr4:97473040	NA	+	ENSG00000270742	0.376812	0.00724638	0.989304	1.24433	1.10758	1.01035	1.71592	1.48304	1.59948	1.05897	0.506024	0.12249	0.493976	0.87751	0.831533	0.415933	1	1	FALSE	FALSE	0	0	0	FALSE
mm_Sliding_topH3K27Ac_slide_40_chr7:116309730	264	164	194	632	317	834	779	978	849	1384	125008154	AAACTTTTAGCAAGACACCGCCATCCAAGGAGACAATTTACAGTTGAGTTAATCTGGGTACATTAGTGAGACATGGATTCTGGACGACAGACCAATTTATGTTGTTTCCCTGTCCCCCATCCCCCTTAGTCCTCTGTG	mm	chr7:116309730	FALSE	0.825664	0.753294	chr7:116309770	chr11:8280686	-3832	+	uc009jdl.1	0.449275	0.0144928	0.418759	0.985029	0.870044	0.965173	0.820934	0.532723	0.701894	0.917609	0.781124	0.833333	0.218876	0.166667	0.935249	0.937978	1	1	FALSE	FALSE	0	0	0	TRUE
mm_Endogenous_chr3:126960670	48	110	89	222	67	62	122	86	74	130	1174804446	AAAGACTCTTTTCACCCGGGCTTAGGGAGGTGAAACAATGCCCTCTGCTCTCCTTACTCGCAGCCTCTCGCATTCCAAGCATTCAGCAGAAACAGCTGCTCTGTCCTGGGCGGGGCGCAGGCACCAGGCCCCACTGCA	mm	chr3:126960670	FALSE	1.37663	0.699006	chr3:126960670	chr4:113942326	31905	-	ENSMUSG00000032826	0.586957	0.0362319	1.32892	1.63708	0.688588	0.903561	0.706204	1.15631	1.483	1.03782	0.548193	0.178715	0.451807	0.821285	0.856988	0.501658	1	1	FALSE	FALSE	0	0	0	FALSE
mm_Sliding_topH3K27Ac_slide_60_chr17:7374360	358	468	572	530	304	433	415	442	547	667	1279948337	AAAGAGCTCTGGCTGCGGGCACTGATTGGTGGGTGGGCGTGTAGGCGTGGCGCAGCGTCGCACTCTGGTTGGTCGGAACGACGCTGGGTGTAGTCTATGGGCGGGGCAGGTTGCCGGGAGCTGGTACTCCTGGCCGGA	mm	chr17:7374360	FALSE	0.912692	1.00706	chr17:7374420	chr6:167040846	17	+	Rps6ka2	0.65942	0.0869565	1.2461	0.861377	0.937289	0.905105	1.16084	1.63788	1.39936	0.959875	0.708835	0.222892	0.291165	0.777108	0.912309	0.55328	1	1	FALSE	FALSE	0	0	0	FALSE
mm_Sliding_topH3K27Ac_slide_-20_chr19:10856250	138	733	102	1314	94	293	779	350	937	414	1525864199	AAAGAGTGACATAAGTTTTCTGGGTATCAGAATTCTATCCCACTGAGTTTATTTTGAGAGAATGATGTAAGTTTTATTTTTAAAATTTCAGTCTTGAAAATATGACATTGGACACGAAGTATGAATCACATCCTGCCT	mm	chr19:10856250	FALSE	2.76019	2.77928	chr19:10856230	chr11:60805495	-11268	-	ENSMUSG00000024670	0.318841	0.00724638	6.31184	6.90651	1.02183	1.1547	1.44715	0.944564	6.60917	2.76973	0.00200803	0	0.997992	1	0.0259157	0	1	1	FALSE	FALSE	0	2	1	FALSE
mm_Sliding_topH3K27Ac_slide_-40_chr8:126813830	141	53	77	203	122	235	225	242	317	392	90978676	AAAGAGTTGGAGAAGTGGAAACAGCACCCAGCACTCTCAGCCAGCATGAGCTTCCCCGTGTCTCGTTCCAGGCTGGTCCATATGGATGGGTATTTTTAGATAGTTGTTTTATTGTGTACATAAAATTTGGTCTCCTGC	mm	chr8:126813830	FALSE	0.841973	0.993038	chr8:126813790	chr1:230300977	-5252	+	ENSMUSG00000089704	0.456522	0.0144928	0.351638	0.822105	0.865552	0.843202	1.13926	0.549402	0.844331	0.917506	0.781124	0.751004	0.218876	0.248996	0.935249	0.918492	1	1	FALSE	FALSE	0	0	0	TRUE
mm_Sliding_topH3K27Ac_slide_-60_chr6:112880270	588	891	795	1589	430	653	605	617	696	1022	1328558516	AAAGATTGAAACTGGGAAGTGTGGTGGGGGGCATTCCTGTCTCTTGGGAGATCTTTCTCCGGAGGGACCAGGATCTGCCTTTCACGAGCTCTTCTCATCTGCTCTCTCCTTCCTGGAAACTGCACAGGCATATGATTG	mm	chr6:112880270	FALSE	0.868373	0.836279	chr6:112880210	chr3:9273037	-16598	-	ENSMUSG00000030257	0.514493	0.0144928	1.67722	1.82577	0.922515	0.824587	1.34795	1.60938	1.75149	0.873551	0.851406	0.0863454	0.148594	0.913655	0.962739	0.352047	1	1	FALSE	FALSE	0	0	0	FALSE
hs_Sliding_topH3K27Ac_slide_-80_chr3:159571125	448	619	485	610	442	1025	761	876	1363	1073	1071625396	AAAGGCCAGGGAGGCTGGGCGGGGCAGTGTCTGTGGGACAGAGTGGGGCAAGAACACACACGGCCGGGCACAGCCTCTTAGCCAGCTCTCCATGTCAGTATGAGCAGTAACCAGGGAACTGGGCAATTGGCACATCAG	hs	chr3:159571125	FALSE	1.04037	1.55987	chr3:159571045	chr3:68388230	NA	+	ENSG00000151967	0.601449	0.0217391	1.13357	0.681865	1.37923	1.11508	0.999124	0.955165	0.977145	1.30012	0.158635	0.638554	0.841365	0.361446	0.514738	0.878268	1	1	FALSE	FALSE	0	0	0	FALSE
mm_Sliding_topH3K27Ac_slide_-20_chr16:98183685	56	90	137	92	242	261	292	268	377	404	1235297385	AAAGGCCGCGTTTTGCGGAGAGGCCGTAGTCCCCGACCGGGCCCGACGTCCTCCTAGGGCGCGGAGCGTGACGGTTACTCACCGCTCTTCAGCCCTGGGGCAGGCGCCAAGCCCCTTTCCGCTCACACTCGGCTCGCG	mm	chr16:98183685	FALSE	1.06024	1.14592	chr16:98183665	chr21:43430367	-141	-	Zbtb21	0.695652	0.130435	0.301028	0.187829	0.932761	0.906058	0.228106	0.492793	0.360449	1.10308	0.405622	0.96988	0.594378	0.0301205	0.763015	0.982187	1	1	FALSE	FALSE	0	0	0	TRUE
hs_Sliding_topH3K27Ac_slide_-20_chr21:43430367	625	818	785	2016	626	884	885	937	1274	1708	1501882161	AAAGGCCGCGTTTTGCGGGGAGGCTGTAGCCTCCCAAGGAGCCCCGCAGTTCTCCTAGAGCTAGGGGCGTGACAGTTACTCACCGGTCTTCAGTCTCGAGGCAGACGCCGGGCCCCTTTCCGCTCACACTCGGCTCGC	hs	chr21:43430367	FALSE	0.760076	0.915956	chr21:43430347	chr16:98183685	NA	-	ENSG00000173276	0.644928	0.0869565	1.05769	1.59114	0.747267	0.749297	0.984168	1.09158	1.32441	0.838016	0.895582	0.277108	0.104418	0.722892	0.976353	0.603625	1	1	FALSE	FALSE	0	0	0	FALSE
mm_Sliding_topH3K27Ac_slide_20_chr7:104936810	267	634	251	968	141	210	272	219	338	324	1808201720	AAAGGCCGCTTCAAAGAGGGAGACCGCGACAGCTCACAGCAGACGCCCGGGCCCAATGACGTCACGCGGCAGCCAGGTGATTCCCTAGCCTCTGGCGTCAAGTGCTGATGACGTCATCCCGGCGCCCCACCTCGCCCC	mm	chr7:104936810	FALSE	1.23148	1.28105	chr7:104936830	chr11:77185470	-200	+	ENSMUSG00000030774	0.65942	0.0942029	3.63957	3.39193	0.935805	0.923212	1.86662	1.54958	3.51575	1.25626	0.192771	0.0060241	0.807229	0.993976	0.56322	0.0847571	1	1	FALSE	FALSE	0	2	0	FALSE
hs_Sliding_topH3K27Ac_slide_60_chr12:123771312	256	212	294	726	203	588	467	524	660	606	558911648	AAAGGCCTCCACAGATGGCTTCTTTACATCATGCTCTCAAATGACTAGCTGATAAATATTCATACTTATGGAAATTGTATTGTACATACTCCAAACGCCCAGCCAGTTAACATTTGTATCTTCTGTATCTCGGGGGTG	hs	chr12:123771312	FALSE	1.13044	1.33741	chr12:123771372	chr5:124814390	NA	-	ENSG00000270113	0.398551	0.0144928	0.845317	1.76698	1.40093	1.18103	1.2431	1.2607	1.30615	1.29098	0.162651	0.287149	0.837349	0.712851	0.516062	0.612667	1	1	FALSE	FALSE	0	1	0	FALSE
hs_Sliding_topH3K27Ac_slide_-20_chr8:81347843	43	34	46	162	48	96	149	117	168	182	491406400	AAAGGCTCAGTTATGCTGTTGCAGGAGAGAGTCAATAATTAGTAACACATTTCTAAAGGTCTCTCTTGCATAATTTTTGTGTCCAGATGTCTATGACATTTGGGTTCTAAAATAGAGTTCCAAATACCACACATTCAT	hs	chr8:81347843	FALSE	1.20093	1.13352	chr8:81347823	NA	NA	+	ENSG00000252884	0.355072	0	0.573347	1.6675	0.761572	0.878045	0.883061	0.834211	1.12042	1.16723	0.323293	0.477912	0.676707	0.522088	0.721268	0.780344	1	1	FALSE	FALSE	0	0	0	TRUE
mm_Endogenous_chr15:82176345	62	81	80	74	29	78	61	96	60	50	2077464634	AAAGGGAGCCCTGGCGGCCCCGCCCTCTGGAGTCCGGGAGGGGCGTCCTTCTCCTGACGTCACTACGTCGTCCGGGCGCCGAGGACTTTCCCACCGGCATACGAATGCGTGCTCTGCGCAGGCGGGAGGGCGGTGCTT	mm	chr15:82176345	FALSE	1.78962	1.47358	chr15:82176345	chr22:42475584	-38	+	ENSMUSG00000022452	0.695652	0.115942	2.26082	1.26074	2.25235	2.62243	2.10745	2.40133	2.25439	2.43739	0.00200803	0.0240964	0.997992	0.975904	0.0259157	0.171624	1	1	FALSE	FALSE	0	1	0	FALSE
mm_Sliding_topH3K27Ac_slide_-100_chr13:51664955	96	82	128	89	106	155	148	160	173	195	1449198174	AAAGGGCCGGCGAGCGAGCCAGCGTTTCTGTGAATGGAGCGGGTCCTTGCAGCCGGTGCCAGGCAATCCCCTGGGCTCAGGCGGCTTCAGCCAATGAGAGGCTGAGCCGATGACTCATTCAACAAAGGCTCGCTCAAT	mm	chr13:51664955	FALSE	1.11334	1.08944	chr13:51664855	chr9:91795442	2302	-	Shc3	0.608696	0.0652174	0.626163	0.414835	1.14765	1.1207	0.892748	1.05115	0.971947	1.13417	0.359438	0.646586	0.640562	0.353414	0.735808	0.880951	1	1	FALSE	FALSE	0	0	1	TRUE
mm_Sliding_topH3K27Ac_slide_-100_chr4:68615430	1386	1775	1554	2865	976	460	480	583	644	960	3741420	AAAGGTGGCCACTACTCCCTCTGCCTCTGGCTCTCTGGCTCTCTCGCCTTCTCCTTTGCCTGCGCTCTTCTCCTCCTCCTGCCCACCCCCTGTGCCAGATCAGTTCGCAGCCGCGGGGACTCGGAGCGAGGCGGCTGG	mm	chr4:68615430	FALSE	0.733452	0.823773	chr4:68615330	chr9:122131746	-201	-	Brinp1	0.65942	0.057971	1.47207	1.45033	0.691828	0.829468	1.39984	1.38599	1.4612	0.778613	0.941767	0.186747	0.0582329	0.813253	0.989773	0.511246	1	1	FALSE	FALSE	0	0	0	FALSE
mm_Sliding_topH3K27Ac_slide_80_chr10:28532080	321	300	333	565	153	211	193	239	200	384	1065787383	AAAGTCACACAGAGTCATTGCTGTATTAATTATGCTTTAGGTTTCCTAGCTTCTCTAATAATGTGGTTTTTCATAAAGTGATACTTTAAGCCATTTATAGATCTTGGCAGGCAAAGAGATAGCAGATGTCATGCCTGT	mm	chr10:28532080	FALSE	0.737272	0.639575	chr10:28532160	chr6:128094893	-109961	-	ENSMUSG00000090126	0.355072	0	1.58712	1.82452	0.793346	0.850098	2.06813	1.89458	1.98135	0.821722	0.907631	0.060241	0.0923695	0.939759	0.979841	0.31382	1	1	FALSE	FALSE	0	0	0	FALSE
mm_Sliding_topH3K27Ac_slide_20_chr18:37803865	962	2332	1424	2460	440	1271	731	1318	858	161	1143782503	AAAGTGCTCCGTCAGAGCGGAAGCAGACGCGGCGCTACGTCACAGACCGGAAGCAGACACGGAGGGGCTGGCCGCCGCTCTTCCGGAAGTACTAGCGGCGCGCGCAGGCGCACTTCGTAATTACGTCGTTCCGTGACT	mm	chr18:37803865	FALSE	6.66029	6.54417	chr18:37803885	chr5:140700384	47	-	Taf7	0.637681	0.144928	4.28998	2.76232	11.3981	11.1813	2.15519	2.81719	3.52615	11.2897	0	0.0060241	1	0.993976	0	0.0847571	1	1	TRUE	TRUE	0	2	0	FALSE
mm_Sliding_topH3K27Ac_slide_-40_chr8:35218130	255	168	181	552	391	1526	1320	1520	1540	1927	971063876	AAAGTTCTCCAGGTCCTCGGACTCCCAGATGGTCCGCTTTTCTTGTTCTGTAGGCCGCATCCTTGAGTCCTGATGACAAGTTTGACTCTCTACCTGCGCATCTTGTCTTGTTATCATGGCTGTTCGATGTCATCATCG	mm	chr8:35218130	FALSE	1.00483	0.981368	chr8:35218090	chr8:29940024	434	+	Saraf	0.492754	0.0434783	0.347786	0.697515	1.14336	1.07737	0.642876	0.402959	0.522917	1.11037	0.395582	0.923695	0.604418	0.0763052	0.753687	0.967667	1	1	FALSE	FALSE	0	1	0	TRUE
hs_Sliding_topH3K27Ac_slide_80_chr9:92222087	132	86	115	344	297	932	1004	884	1158	1181	1981682760	AAATAGGCATGAGCAATTCTGAGGGGGCCTGGCATCTGCTATCTACTATTTTCAGTGTTCTCTGCCCACATCAGAGTTACGAGGATTGCTGCTATTCACAATTCCGTTTAAAGACTCATAGGAAAAAAAAATTAAATA	hs	chr9:92222087	FALSE	1.24706	1.20407	chr9:92222167	NA	NA	+	ENSG00000130222	0.391304	0.0144928	0.234381	0.57226	1.1394	1.02236	0.438108	0.337055	0.40332	1.22556	0.2249	0.959839	0.7751	0.0401606	0.598048	0.980985	1	1	FALSE	FALSE	0	0	1	TRUE
hs_Sliding_topH3K27Ac_slide_-20_chr17:33914281	306	192	230	252	48	145	88	170	117	108	884432569	AAATCTTTGGGTCTGGAAGGCGACAAGAGATCACAGGCTTTCTAGGTCTACCGCGCACCCCGATGACGTCACGCGGCGACGTTCTCTGACGTCAGAGTTTCCTGCCCACCATCTTTGTCCCTGGCAAAGTGGGTTTTG	hs	chr17:33914281	FALSE	1.19526	1.33032	chr17:33914261	chr11:83116175	NA	+	AP2B1	0.550725	0.0724638	3.23772	2.59388	1.93845	2.14995	6.28411	4.17105	5.22758	2.0442	0.0140562	0	0.985944	1	0.130419	0	1	1	FALSE	FALSE	0	2	0	FALSE
mm_Sliding_topH3K27Ac_slide_-80_chr7:17568420	188	185	349	334	96	328	334	370	472	356	179687427	AAATGAGAAAGGTATGAGGCGCTGACCCTTCACTTCCCAGTGACCCCTCTTTGCCTTAGTTTCTGATTTCAAAGCAGCAGGATCTGCCAATAGAGGAGGTGATGCTCTGGCGGTTGCCATGGTGACCACAGGGCTTCA	mm	chr7:17568420	FALSE	1.37625	1.62811	chr7:17568340	chr19:46932200	-9796	+	ENSMUSG00000041117	0.514493	0.0144928	1.55984	1.71896	1.33026	1.41956	1.93041	3.16456	2.54749	1.50218	0.0682731	0.0120482	0.931727	0.987952	0.344173	0.106055	1	1	FALSE	FALSE	1	0	0	FALSE
hs_Sliding_topH3K27Ac_slide_-100_chr7:127581814	1344	1777	1129	3178	684	1117	1102	1234	1528	2171	1877713205	AAATTGGAACATGGTGTCTGTCTCTTCTCTGTGTGTGTTTTGGATGCAGCCCCTGTGCTAGGCATGCGGTTATTAACTCCACTGATATACCAGTTCGCTCATTAGCATTTGCATTTTAAATTACAAGCTAGAGCAGAC	hs	chr7:127581814	FALSE	0.744601	0.864284	chr7:127581714	chr6:28704050	NA	+	ENSG00000197157	0.427536	0.0144928	2.10286	2.29556	0.742856	0.77635	1.9369	1.4368	2.19921	0.804442	0.921687	0.0321285	0.0783133	0.967871	0.986331	0.21841	1	1	FALSE	FALSE	0	0	0	FALSE
mm_Sliding_topH3K27Ac_slide_-20_chr5:126064405	13391	27944	14435	34910	2580	7392	9929	7965	9430	6671	1031703229	AAATTGGGTTGGCACCACATCCAGGTGGCATGTGGTGGCGTGTGCAGTCAGATTATTTTTATTTATGATCTCTGAGTCACTCCCGTCTCCATGGTGATGGGTGCGCTGAAGGCAGAGGGAGGGAGTGAGTCCCTGCAT	mm	chr5:126064405	FALSE	2.18331	1.73586	chr5:126064385	chr12:125757218	-38465	+	uc008zrt.2	0.521739	0.0217391	8.76695	6.68531	1.59986	1.63079	5.11631	4.87031	7.72613	1.95959	0.0160643	0	0.983936	1	0.137528	0	1	1	FALSE	FALSE	0	0	1	FALSE
mm_Sliding_topH3K27Ac_slide_40_chr6:134836725	133	218	158	266	126	112	143	149	147	248	255682734	AACAACATTTGTAGCCCAGCAGACTACTGACATCATTTGAGATAACACAGCAGCCAAGCAATACAGTTCATGACTAAGAACAAGGACTTTACGGTTCAGAGTCTTGGGATTCAATTCTTGTTCTATTACGTGCTCCCT	mm	chr6:134836725	FALSE	0.845836	0.727878	chr6:134836765	chr12:12836316	-998	-	Gpr19	0.413043	0.0144928	1.40044	1.04304	0.652045	0.82061	1.04051	1.09156	1.22174	0.786857	0.933735	0.365462	0.0662651	0.634538	0.988136	0.68335	1	1	FALSE	FALSE	0	1	0	TRUE
mm_Sliding_topH3K27Ac_slide_60_chr6:47543865	55	32	25	136	74	147	175	169	170	509	1879556266	AACAACCTACCCCTGGAGATTTGGGGAATAATCACTGAGTAAATGACAGTTGATTTCGTTAGCACCTGTCACCATTCTCAAAAGCACACAAGTTGGCCAAAACAGATTTTGTTTTTCTTTCAGGTTTTGGTCCTTTAG	mm	chr6:47543865	FALSE	0.504338	0.410132	chr6:47543925	chr7:148580141	-1044	-	Ezh2	0.398551	0.00724638	0.350024	0.908026	0.416976	0.453494	0.732646	0.294081	0.629025	0.457235	0.993976	0.881526	0.0060241	0.118474	0.998602	0.957986	0.689357	1	FALSE	FALSE	0	0	0	TRUE
hs_Sliding_topH3K27Ac_slide_-20_chr20:45944549	214	159	268	727	279	364	387	474	503	717	1906822605	AACAATGACAAACAGCCACTGTCGACTGAACCACTGGTTCACCCTGGATCTGAAAGACTTTTCTGCTGCCTTTTCTGAGGGAGTAGGACCTGTGACCCCGCCCGGCTGGCTCACTCACAACCCTCTGCCTCTCACCCA	hs	chr20:45944549	FALSE	0.79176	0.861473	chr20:45944529	NA	NA	-	ENSG00000263770	0.550725	0.0217391	0.461288	1.28742	0.732982	0.902946	0.756089	0.836161	0.874356	0.826617	0.903614	0.732932	0.0963855	0.267068	0.979841	0.913817	1	1	FALSE	FALSE	0	0	0	TRUE
hs_Sliding_topH3K27Ac_slide_-40_chr9:91833070	137	77	95	220	181	529	682	698	627	864	1578381030	AACAATTTTTTTAAGAAAACATGCCGCATTCATTTCTTAAACACGCTGAGAACTACTGTAATTATTTCAATGAGAAATTCCTGCGAACTCCTCCTGTCTCCTTATGTCTGCTTCCTCTCAGCGAGTCACAATGTGTTT	hs	chr9:91833070	FALSE	1.1579	0.891141	chr9:91833030	chr13:51676150	NA	-	SHC3	0.376812	0.0289855	0.344343	0.600531	0.884002	1.10343	0.746115	0.456882	0.601498	1.02452	0.580321	0.89759	0.419679	0.10241	0.873408	0.960948	1	1	FALSE	FALSE	0	0	0	TRUE
hs_Sliding_topH3K27Ac_slide_-60_chr22:18121403	58	53	52	173	39	124	153	146	217	193	2089246658	AACACAGCGACCAGCCGGTCAGAATCCCAACCCCTCGACTCCGGAAATGATCTGAGAGACGGAACTTCCGAACGTCGCAATCAGATTTGGGCGGGCTAGGAGGGTTTGGGTCTTCAGGTCACATCTGGACGGAGAGAC	hs	chr22:18121403	FALSE	1.16288	1.38069	chr22:18121343	chr6:120786110	NA	+	ENSG00000099968	0.565217	0.0724638	1.1	2.19166	0.927632	1.03323	1.46598	1.16064	1.64583	1.27178	0.180723	0.11245	0.819277	0.88755	0.544707	0.396103	1	1	FALSE	FALSE	0	0	0	FALSE
mm_Sliding_topH3K27Ac_slide_-100_chr11:102091540	235	698	388	596	759	1015	1042	1280	1091	1681	685214109	AACAGCAGCGGCAGCGCCTCCTCGACGGCTCCTCCATCTTTGCGGCGGCTCCTCCGGCTCCGCTCGCCGCCGCCACCAACAACAACATTCGGAGACGTCACTCTCGTCACGTGACCCGACCCCGAGCTAAAAATAGGC	mm	chr11:102091540	FALSE	0.909289	0.796985	chr11:102091440	chr17:42201102	-146	-	Hdac5	0.644928	0.123188	0.744378	0.387968	0.871785	1.04003	0.305204	0.444989	0.566173	0.955906	0.714859	0.905622	0.285141	0.0943775	0.912309	0.961052	1	1	FALSE	FALSE	0	1	0	TRUE
mm_Sliding_topH3K27Ac_slide_-80_chr15:72682960	573	816	932	1366	474	573	679	654	716	858	1700490029	AACAGCTACTCCCAGCAAAGGGCCAGCCACTTCCCACATCCACATGATAGTCCTGTGCTTTGTCCACTCTATGCAAGCAATCGTCTCCAGTGTTCCTGAGGCTTTATTCACACTGTCCCTGAGGATGGCGAGTCTGCA	mm	chr15:72682960	FALSE	1.16087	1.02475	chr15:72682880	chr8:141152802	42046	-	Peg13	0.521739	0.0144928	1.39345	1.42385	0.964226	1.0411	1.19163	1.71158	1.4516	1.09281	0.427711	0.190763	0.572289	0.809237	0.782693	0.514446	1	1	FALSE	FALSE	0	0	0	FALSE
hs_Sliding_topH3K27Ac_slide_-80_chr12:31742875	130	90	91	184	143	324	234	314	407	535	2031856451	AACAGGCGTGAAAAATGAAATCAGTTGTTTCTCCCCGGCCTCCTCTCGACACTGCGCACTCCGCTGCCCTGCCCCCGCCCATCGCCCTTTAGCGGCCCCTTTTAACGGCGTCGTTTGCCCAGCACAGCCCCGCACTGC	hs	chr12:31742875	FALSE	0.641599	0.934186	chr12:31742795	chr6:149049100	NA	+	DENND5B-AS1	0.623188	0.0869565	0.509432	0.63573	0.874385	0.801638	0.89613	0.553942	0.725036	0.838011	0.895582	0.817269	0.104418	0.182731	0.976353	0.929292	1	1	FALSE	FALSE	0	0	0	TRUE
mm_Sliding_topH3K27Ac_slide_-100_chr16:94458590	254	125	121	349	165	269	389	442	495	513	1363799149	AACCCGCTGTCCATCTGACAAATCAACGTTGGATTAAAAGTATTATTACCGTCTGCGATTGTGTTCTGAAGTTTCACTTCCCAATCTATAAGGCTTTTTATCTCAGAGACACATTTGGCTCATGATAAATAGATTAGT	mm	chr16:94458590	FALSE	1.11233	1.1849	chr16:94458490	chr21:38282276	-6564	-	ENSMUSG00000041929	0.369565	0.0289855	0.613205	1.04504	0.757088	1.17681	1.51745	0.638353	1.0779	1.14861	0.343373	0.508032	0.656627	0.491968	0.730813	0.790247	1	1	FALSE	FALSE	0	0	0	TRUE
mm_Sliding_topH3K27Ac_slide_-60_chr6:118405150	197	266	251	283	97	321	289	236	297	311	1134144755	AACCGAGTCTCGGGTAGGTTATTCTGTCCCAGTAATTCATTCACTCGGGACCTGGCTTACCCGCTCGCCCCCCACATCCCAGCATCTAGCCCCAGCAGCCAGAGAACGGATGCGTCACCGCGTCACGCTCGCGCCATG	mm	chr6:118405150	FALSE	1.36314	1.17271	chr6:118405090	chr10:38146596	-53	-	ENSMUSG00000030145	0.608696	0.0869565	2.21968	1.44147	1.49024	1.03646	2.00197	2.25248	2.12723	1.26792	0.182731	0.0421687	0.817269	0.957831	0.547874	0.259436	1	1	FALSE	FALSE	0	0	1	FALSE
mm_Sliding_topH3K27Ac_slide_-80_chr11:97627965	1487	1343	1765	1405	429	1550	1348	1768	1389	1443	1358130820	AACCTAGGGAAACAGTTCAGAGACGGCCTCTCGGGACCTAATCCCTACAGGAACCAGCTGCCCTTTTCCCCGCCCGCTCTAGCTCGCACTTCCGGGGTGGTGTCATATGACTGCGTCAGCGTCTCGGCTCGATGACGT	mm	chr11:97627965	FALSE	1.37033	1.18203	chr11:97627885	chr17:36981654	-122	-	Cwc25	0.594203	0.0797101	2.53395	1.61812	1.55087	1.67347	3.41678	3.58135	3.49906	1.61217	0.0401606	0.0060241	0.959839	0.993976	0.24316	0.0847571	1	1	FALSE	FALSE	0	0	0	FALSE
mm_Sliding_topH3K27Ac_slide_-80_chr17:37095545	430	668	369	788	445	683	673	941	931	1225	933122722	AACCTCATTAGGTCCGACGTAGGCGGAAAACTGATAGAGTCCCGATCCCAGACGCGGGCTAGAGCGCCCGATCCCAAGGCGTCGGGCAACGAGTGCGCCCGGAGGGCTAGAGCGTCTTCGCGTCCTGGTGGCCGTTGG	mm	chr17:37095545	FALSE	0.805899	0.933268	chr17:37095465	chr6:30028962	-151	+	Znrd1as	0.644928	0.123188	1.21506	0.874898	0.805	1.04919	0.952515	0.721814	1.04498	0.927097	0.767068	0.544177	0.232932	0.455823	0.929525	0.81295	1	1	FALSE	FALSE	0	0	0	TRUE
hs_Sliding_topH3K27Ac_slide_80_chr13:109115896	557	498	480	1556	390	607	674	710	1055	1099	2301643	AACCTCTTACATGTTGGCGGAAGCTGATGTCATTCTAGGTATTATTCATTCTTAGTGGATTGATACTCAGTGTGCTAATAAGTCTCAATGATAAAAAGAACTAAGTATACATACCGGTTAAACATTACTTAACCCTTT	hs	chr13:109115896	FALSE	0.89963	1.17882	chr13:109115976	chr8:10131055	NA	+	ENSG00000232087	0.34058	0.0144928	1.03358	1.97122	0.797448	0.882395	1.40784	1.07136	1.5024	1.03923	0.544177	0.172691	0.455823	0.827309	0.855776	0.501658	1	1	FALSE	FALSE	0	1	0	FALSE
mm_Sliding_topH3K27Ac_slide_-40_chr7:120491125	366	291	259	1089	240	200	298	266	337	439	1514992878	AACGCAGGAGATGAGGGCTTAGAGATATGTAGACATGTTGCCAAATGCCATCTGTAAAGCTAATTCCAGCTCTGACAGCTTGCCAGGTTTTAGGAACTAGGATGCAGATAACTCCTTCCTTTCAGTATCACTGTATCC	mm	chr7:120491125	FALSE	0.995757	0.942667	chr7:120491085	chr11:13462017	246	-	ENSMUSG00000038187	0.442029	0.00724638	0.981435	2.24186	0.657774	0.827598	1.50326	0.939394	1.61165	0.969212	0.694779	0.114458	0.305221	0.885542	0.912309	0.396103	1	1	FALSE	FALSE	0	0	0	FALSE
mm_Sliding_topH3K27Ac_slide_-20_chr12:32036340	227	215	262	328	80	565	336	666	468	237	1235936299	AACGCCTGGTAAGACTTATCCAAGGTCTCCCCACCCTGCGCCTGCGCAACATATACGTCATCGCCGAGGAGCAGCGCGATTGGCCCGAAAGGCAGAGGCTTTCCGGTCGCTTCGTCGTGCGCTGTCGTGAAGGGCGCT	mm	chr12:32036340	FALSE	2.07966	2.42488	chr12:32036320	chr7:107531553	-36	-	Dld	0.615942	0.115942	2.17534	2.0257	3.442	3.83821	2.79704	2.85082	2.82393	3.64011	0	0.0100402	1	0.98996	0	0.106055	1	1	TRUE	TRUE	0	1	0	FALSE
mm_Sliding_topH3K27Ac_slide_80_chr4:48300480	272	159	222	436	160	262	230	377	316	337	1930960507	AACTAATTAAATCGAACCCTTTCTGAGCAGCCCATTGTCCTGGAGGAAACTGAAGAGGCCTTCTCTGAGTGAAACATCTTTTTAGTAGCAGTCCTTGCTGTTGCACCTAACAAATGACTGCTCTAGCATTTTCTACTT	mm	chr4:48300480	FALSE	1.00115	1.15146	chr4:48300560	chr9:102871050	7898	+	ENSMUSG00000028344	0.42029	0.00724638	0.804372	1.34635	1.12249	1.52797	1.67576	1.20779	1.44178	1.32523	0.140562	0.196787	0.859438	0.803213	0.48255	0.52343	1	1	FALSE	FALSE	0	0	0	FALSE
mm_Sliding_topH3K27Ac_slide_40_chr3:82161790	150	49	118	225	66	127	100	134	129	163	1893348469	AACTAGCAAAAGGAAGCTTTGCATCGTGGTCACGCAATACCTGCCTATAAACAAGGACTCTGAGCAGGGGCAATCAAGGTTCCTTGTGGCGTGATGGCAGAGGGCCGGTCTTGTTTCCTAGGTAACAGCCATTGCACA	mm	chr3:82161790	FALSE	0.899941	0.97184	chr3:82161830	chr4:156298267	-95	+	uc008pow.1	0.507246	0.0289855	0.600941	1.68434	1.12493	1.12284	2.24032	1.55631	1.89832	1.12389	0.371486	0.0662651	0.628514	0.933735	0.740599	0.326851	1	1	FALSE	FALSE	1	0	0	FALSE
hs_Sliding_topH3K27Ac_slide_40_chr6:3454544	446	408	494	766	322	425	519	541	588	998	248510475	AACTATTTTTGTTCTCTCCTCCCACCGTGCATGGCTGAGTGTGAATAGCTGTTTCCTGGGTCCTCACTGCCAAGGTAATGGCACTCTATCCCATCTCATCACTTTCAAGTTCACCTCTACTTTGACCCCAGGACACAG	hs	chr6:3454544	FALSE	0.762849	0.723502	chr6:3454584	chr13:34434280	NA	+	uc003mvs.1	0.485507	0.00724638	1.02561	1.17534	0.614851	0.740405	1.36535	1.33546	1.3504	0.743175	0.957831	0.26506	0.0421687	0.73494	0.989773	0.603625	1	1	FALSE	FALSE	0	0	0	FALSE
mm_Endogenous_chr9:74800655	537	568	890	1280	387	2357	791	2228	1474	993	4387930	AACTCCAGGACGCGCGGCGGCGTTGCCATAACAACCGGCGCGCGCAGCCTCAGCGGAGGAAGTGACGAGAGTGGGTTGGCTGTTGTTGGGACACGTGACCAGGGTAGTGTTTTGACAGGGCAAACAGTGAGAGAAAGA	mm	chr9:74800655	FALSE	1.1685	1.82281	chr9:74800655	chr15:52971639	-35	+	ENSMUSG00000034858	0.594203	0.0869565	1.188	1.63414	3.42706	3.06456	1.36781	2.00188	1.68485	3.24581	0.00200803	0.0963855	0.997992	0.903614	0.0259157	0.368476	1	1	FALSE	FALSE	1	0	0	FALSE
mm_Sliding_topH3K27Ac_slide_-20_chr6:122719940	390	368	391	1046	259	522	495	553	542	622	1764226945	AACTCCGTTCCAGGACTCAATCCAAACTGTCGTCTCCAGACCAGCTTCTCTTGCTCATCTTTTCTAGCCCACTCTTCTTCCCATGCCCCCTTCTCTTCTCCAGAGAGGAGTTGCCATGGAGATAGTGATGTCACAGTA	mm	chr6:122719940	FALSE	1.16739	1.07004	chr6:122719920	chr12:8129593	-10075	-	ENSMUSG00000003153	0.5	0.0144928	1.15008	1.99537	1.21169	1.21433	1.48432	1.31412	1.57272	1.21301	0.242972	0.134538	0.757028	0.865462	0.622015	0.424903	1	1	FALSE	FALSE	0	1	0	FALSE
mm_Sliding_topH3K27Ac_slide_-80_chr5:42458975	43	32	29	86	36	268	281	254	347	373	636637291	AACTCTCCCCTCATCTCCTTAAACAATGATTCCCTCATTTTCATATTAATTGCATCACTTAACTGAGATAATGCTCCCTCTGAAATGAGCAAGGGGATGAATCACTGAAACGGGCTATTATTCTTTTTGCTTAACCAA	mm	chr5:42458975	FALSE	1.10509	1.14239	chr5:42458895	chr4:13853090	-383	+	ENSMUSG00000067285	0.376812	0.00724638	0.719494	1.18029	1.03738	0.930095	1.17741	0.701221	0.94989	1.12374	0.371486	0.660643	0.628514	0.339357	0.740599	0.881799	1	1	FALSE	FALSE	0	0	1	TRUE
mm_Sliding_topH3K27Ac_slide_20_chr4:49644870	31401	30550	32069	55468	22741	72222	32928	76793	39288	19818	709971242	AACTGACTGCGCCCCCTCCTCACGCGTCACTTCCGCCTGGCGGTCTCCCACACGTCACTTCCGCCCTCTCCTCGCCGTGCCTCGGGTAAAGTTGAAGCAACTTCCTTTTCCTTTTCCCTACTTCCTCTCCGTGCCTCC	mm	chr4:49644870	FALSE	2.43729	2.43441	chr4:49644890	chr9:104296048	33	+	ENSMUSG00000028309	0.608696	0.0797101	1.08738	1.2051	5.26164	5.29254	1.36112	1.22754	1.29433	5.27709	0	0.301205	1	0.698795	0	0.629742	1	1	TRUE	TRUE	0	0	0	FALSE
mm_Sliding_topH3K27Ac_slide_-20_chr5:42458975	283	172	126	473	177	572	404	565	742	745	1896737045	AACTGAGATAATGCTCCCTCTGAAATGAGCAAGGGGATGAATCACTGAAACGGGCTATTATTCTTTTTGCTTAACCAATTTCACAGGCCCCGCACAAAGCACTGCCTTCATTTGGCTTCCCATAATTGCTTATCATTA	mm	chr5:42458975	FALSE	0.795476	1.22304	chr5:42458955	chr4:13853090	-263	+	ENSMUSG00000067285	0.42029	0.0144928	0.786565	1.32032	1.10854	1.03584	1.57607	0.619664	1.09787	1.07219	0.485944	0.495984	0.514056	0.504016	0.83051	0.787024	1	1	FALSE	FALSE	0	0	1	TRUE
mm_Sliding_topH3K27Ac_slide_60_chr16:9281175	1527	1598	1038	3889	506	1594	1880	1543	2104	1025	811951426	AACTGAGCAGCACCGTTTGCCTCATAGTGACGCACCAGCAGGTGGTTACCATGGAATGAGACAGCAGCAAAGCACTGTCCCTGTCGTCATGGAGCCCCTGAGCCATCTCCTAAGCAACCTGGCAGGAGATCCCCAAAC	mm	chr16:9281175	FALSE	2.69052	2.52066	chr16:9281235	chr16:9583844	284836	-	ENSMUSG00000090530	0.557971	0.0217391	2.55626	3.79733	2.24531	2.0561	2.97476	1.78569	3.1768	2.60559	0.00200803	0.0060241	0.997992	0.993976	0.0259157	0.0847571	1	1	FALSE	FALSE	0	1	0	FALSE
mm_Sliding_topH3K27Ac_slide_80_chr18:83082540	152	153	112	342	143	528	339	496	443	473	10168972	AACTGCCTTGCAAAGTCTCCCTGCCCCCTGGGTTTGAGTGACGGCTCTGTTGGCCAATCCGCAGCAGCTTTCTCTATCCCGGAGGTAATTTGGGGTGTGTGTGTGAGCGCGCGCACGCGCGACCACGCGCCCGTGTAT	mm	chr18:83082540	FALSE	1.05133	1.1501	chr18:83082620	chr18:74205054	-1323	+	Zfp516	0.608696	0.0869565	0.866034	1.18163	1.6117	1.43226	1.04778	0.681775	1.02383	1.52198	0.060241	0.570281	0.939759	0.429719	0.310988	0.828863	1	1	FALSE	FALSE	0	0	0	FALSE
mm_Endogenous_chr7:105804305	101	133	152	232	87	221	254	141	275	199	1883294782	AACTGGATGGCGCGCCCCAGCTGGCAGGATGACATAAAGAAAGGGGGTGGAGAGGAGGAAGGGGCAGAGCCAAAGGAATCCGCTCGCTCCCCAAGCCAGTCCCCGCCTCCCGGTAGAATCTCGGAGGCGGCCGGCGAC	mm	chr7:105804305	FALSE	1.87233	1.69696	chr7:105804305	chr11:76156846	-774	-	2210018M11Rik	0.652174	0.0724638	1.23741	1.31753	1.60343	0.967762	1.14437	1.52084	1.3326	1.78465	0.0220884	0.2751	0.977912	0.7249	0.162375	0.603625	1	1	FALSE	FALSE	0	1	0	FALSE
mm_Sliding_topH3K27Ac_slide_60_chr3:25496555	45	36	33	152	59	136	106	215	197	206	1574143026	AACTGTGAGCTGAGGAAGCGAGCAATTTACAGTGCTTCCCAGGCCTACATTTATTTTATAGCTGCCATATGAGATTTTATTTCTGGATGAAAGCTGCATTGATAAAGAGGTTTAATTGTCTGTCAGTACGCCTTATGG	mm	chr3:25496555	FALSE	0.754815	1.17433	chr3:25496615	chr3:173820910	51734	+	ENSMUSG00000087945	0.398551	0.0144928	0.49389	1.27287	0.953198	1.42552	0.751838	0.486879	0.883378	1.18936	0.277108	0.720884	0.722892	0.279116	0.667588	0.909709	1	1	FALSE	FALSE	0	0	0	TRUE
mm_Endogenous_chr5:35363250	676	839	979	1899	665	1414	1289	1535	1416	2026	615951892	AACTTAAGTGTGTGACATTTAATTCTGCCTAAACATAGTCTGCATAAATGCCTCGCCACAGAGCCTGGCAGTGGTGGCACTTGACGTTGGGTTGGGTAAGAAGGAACAGTGTTTGAAGAGACTTGGAGAAGCACTCTG	mm	chr5:35363250	FALSE	0.933287	0.858256	chr5:35363250	chr4:3417123	-447	+	Mir3097	0.463768	0.0144928	1.02122	1.41089	1.00768	1.03484	1.00205	1.2815	1.21606	1.02126	0.590361	0.371486	0.409639	0.628514	0.878124	0.689357	1	1	FALSE	FALSE	0	0	0	TRUE
mm_Sliding_topH3K27Ac_slide_40_chr13:34434280	3172	3906	4843	10218	2466	4844	4070	4952	5288	6436	1942440631	AAGAACTATTTTTGTTCCTGCTTCACACCATGCCTGGCAGGGGATGAGTAGCTGTCTCCTGGTCCCACCGCTAGAGTAATGGTTGGTTTGCTCCACCGGCTAACTTCCAACTTGACTCTAGCACAAAGCCCTCTTCAC	mm	chr13:34434280	FALSE	0.927642	1.00895	chr13:34434320	chr6:3454544	-1712	-	ENSMUSG00000038267	0.507246	0.0144928	1.28209	2.04722	1.08667	1.05091	1.26795	1.70955	1.66465	1.06879	0.491968	0.106426	0.508032	0.893574	0.831284	0.395173	1	1	FALSE	FALSE	0	0	0	FALSE
mm_Sliding_topH3K27Ac_slide_-60_chr1:183910735	202	142	191	619	213	396	364	388	596	542	912461851	AAGAATTTTCTTCTCATGCTGGCTTCTGCCCATCTGTAGCAGCTATCAGCTGGCACGGTATCCAAATCCAAATCCAAATGCTCAAAGCAACTCACATGCATCTCTAAGCAACAGCCGTGTAATCCTTATAGGACGTCT	mm	chr1:183910735	FALSE	0.985154	1.35033	chr1:183910675	chr1:225783420	-39496	-	Enah	0.449275	0.0217391	0.53962	1.43583	1.05489	0.977766	0.934836	0.780572	0.987724	1.16774	0.323293	0.62249	0.676707	0.37751	0.721268	0.86694	1	1	FALSE	FALSE	0	0	0	TRUE
mm_Sliding_topH3K27Ac_slide_-60_chr15:96471305	587	301	346	1210	672	1018	1110	1072	1279	1431	662459556	AAGACAGAGGTTAGGCGGCCATACCAGACCCGTGCAGTGGCGGGACTTGCCAGTTTCCTATAGGGTGAGTTATTTGACAATGAGGCCAGCCAGCTCAGGTTTTATTTCCGTTGTCCTTCTGACGTCAGAAAAAGCACG	mm	chr15:96471305	FALSE	1.13785	1.09755	chr15:96471245	chr12:46660828	-1208	-	Slc38a1	0.514493	0.0434783	0.362557	0.889626	1.02712	1.02319	0.861058	0.448194	0.654626	1.1177	0.38755	0.86747	0.61245	0.13253	0.752167	0.950006	1	1	FALSE	FALSE	0	1	0	TRUE
mm_Sliding_topH3K27Ac_slide_60_chr16:5992280	300	629	322	1234	256	420	709	583	975	1084	1390909826	AAGAGAAAGGAGCTGTCGTCAGGCACACTGAAAAGTTGAATTGCAGGTTTCCATGGCAACCAAGTTGCGCTCGGAGATTTTCTAGCCCCGCATGTTTTAATGAAAACATTTCCTCAGCCATTATAGATGGGCTTGTGT	mm	chr16:5992280	FALSE	0.959442	1.10451	chr16:5992340	chr16:6193204	16721	+	1700123O21Rik	0.449275	0.0289855	1.9888	2.38159	0.559411	0.734584	1.15517	1.0949	2.18519	1.03197	0.560241	0.0341365	0.439759	0.965863	0.858236	0.228442	1	1	FALSE	FALSE	1	0	0	FALSE
mm_Endogenous_chr6:141444305	65	51	56	173	83	280	356	394	403	576	1624577874	AAGAGGTTTCTAATGAAGTACTAAGCTGTGCTTGGAGTCTGCACCACGAAAGGCGCTTTGTTCTCCTTTCAAAAGGTTCCAGTGCTGAATAATTTGGCTCCCAGCGCTGGCTAGTTTCAGACCACCTGCAGATTCTAA	mm	chr6:141444305	FALSE	0.906628	0.859163	chr6:141444305	chr12:20810572	-28601	+	Slco1c1	0.463768	0.0217391	0.497361	1.02981	0.701854	0.934278	0.771967	0.587312	0.763588	0.882896	0.839357	0.799197	0.160643	0.200803	0.958967	0.926906	1	1	FALSE	FALSE	0	0	0	TRUE
mm_Sliding_topH3K27Ac_slide_-100_chr8:129411060	25	74	50	145	55	85	104	96	91	138	1006688716	AAGCCTGCTGGCTGTACAGAGCCCAATGGAAACAGCTCAACTTCTTGGTGGAGCAGAGAGTAGCTGAGTTCTTGTGAAGGGGGAAAAAATGCAAATTTGTTTTCAGTATCGCTTACAAGCTTCCTGAGTGGAGCCCTT	mm	chr8:129411060	FALSE	1.10549	0.809758	chr8:129410960	chr1:235184082	10522	-	uc009nyy.1	0.471014	0.00724638	1.08905	1.30256	0.889306	0.950155	0.448065	0.791346	1.1958	0.957625	0.714859	0.399598	0.285141	0.600402	0.912309	0.71449	1	1	FALSE	FALSE	0	0	0	TRUE
mm_Sliding_topH3K27Ac_slide_80_chr3:65470100	114	366	167	160	159	245	316	250	463	238	960358814	AAGCTCCGCTTCCGCGTCGGCGGGGGCTGTGACGTCACCGCGCCTTGACGTCAGGCCAACGTGCAGCGCGGTCGCCCGGGAGACCAGGGAAGCCGTTTTACACCCTGCGGAGTCCCGGGCTAGGTGAGGGTCATGGCC	mm	chr3:65470100	FALSE	1.94765	2.38889	chr3:65470180	chr3:156544026	111	+	Lekr1	0.695652	0.123188	1.86322	0.49718	1.48628	1.43471	0.706759	0.914278	1.1802	2.16827	0.0100402	0.417671	0.98996	0.582329	0.106382	0.734938	1	1	FALSE	FALSE	0	2	0	FALSE
mm_Sliding_topH3K27Ac_slide_-20_chr3:25496555	244	283	102	619	171	530	704	455	768	727	1371575447	AAGCTGAAATGATCCTCAGGATGACTAATGTCTGATGCAAATAAACTCAAATGTCAAAACAATGCAGACGTTATAAGCCCAACTGTGAGCTGAGGAAGCGAGCAATTTACAGTGCTTCCCAGGCCTACATTTATTTTA	mm	chr3:25496555	FALSE	1.4205	1.29724	chr3:25496535	chr3:173820910	51574	+	ENSMUSG00000087945	0.398551	0.0144928	1.33958	1.78849	1.05257	0.854829	1.40656	0.519234	1.56404	1.35887	0.124498	0.134538	0.875502	0.865462	0.463991	0.424903	1	1	FALSE	FALSE	0	0	1	FALSE
hs_Sliding_topH3K27Ac_slide_80_chr14:99681842	80	40	50	136	59	157	115	120	173	201	1134320579	AAGCTTAAGACTAATTCCAGCATGCGGACGGCTCTCACATAGTAAGGCTGGCTCCAGCATAAATGAAACCAGGCACTGTAAAATACCAAGGCACGTTGGAGTTTCCACTTAAAGGGACAGAACACTGATTCCAGGTAT	hs	chr14:99681842	FALSE	0.839274	1.05692	chr14:99681922	chr12:109190685	NA	+	ENSG00000235785	0.456522	0.0217391	0.548766	1.13888	1.12776	0.815432	1.3366	0.737696	1.03715	0.971593	0.688755	0.556225	0.311245	0.443775	0.912228	0.820032	1	1	FALSE	FALSE	0	0	0	TRUE
hs_Sliding_topH3K27Ac_slide_40_chr2:44001126	1733	1567	2329	1803	142	2331	711	2373	960	386	1629475563	AAGGACTCCTGAAAACTACATTTCCCATGATGCCCGTCTCCCCACGCAACCGCGGCCGCGACGTCGCTCCCATGGCAACCCAGAAGGCCTCACTCCCAGACTCCTTGCGGAGCTCGCCGCCTGATTCTAGGCTGGTCA	hs	chr2:44001126	FALSE	2.70199	3.05405	chr2:44001166	chr17:85025780	NA	+	DYNC2LI1	0.615942	0.0797101	8.93224	6.27334	8.71899	8.39678	12.0302	14.2771	13.1537	8.55789	0	0	1	1	0	0	1	1	TRUE	TRUE	1	0	0	FALSE
hs_Sliding_topH3K27Ac_slide_80_chr17:71766832	251	333	266	287	143	386	433	465	499	510	642340302	AAGGAGCCAGGCCCAGCAAGTTATTTATGGAAACGGCTGGCGGCCAGGCACAGCTCCTGAGCTGTTTCAGATGTGGCTGGGATAAAGCCTCCAGCTGGCCCACTGGGGCTGCTGAGGCCAGGCAGGCGGGTGAGGATG	hs	chr17:71766832	FALSE	1.24543	1.2015	chr17:71766912	chr11:114059780	NA	-	ENSG00000177338	0.615942	0.0217391	1.8849	0.991601	1.09277	1.24533	1.73022	1.61922	1.67472	1.22346	0.2249	0.10241	0.7751	0.89759	0.598048	0.385496	1	1	FALSE	FALSE	0	0	0	FALSE
mm_Endogenous_chr17:34973915	807	871	1012	1184	270	2381	724	2476	992	534	399795254	AAGGAGTCCCGAAGACCGCGTCTTCCGGCACAGAATAATGACGACGGGCCCTCTGGCTGGTCGTCTGAGTTTGATGACGAAGGCAGCCTCACTTCCGTCGCCCGCACCGCTGCTGATTGGCTCCCGACCAGAGCGCTC	mm	chr17:34973915	FALSE	1.98884	2.2812	chr17:34973915	chr6:31940003	25	-	ENSMUSG00000061207	0.623188	0.101449	2.61116	2.1666	6.43768	6.33303	2.94627	3.26269	3.10448	6.38536	0	0.00803213	1	0.991968	0	0.104448	1	1	TRUE	TRUE	0	0	0	FALSE
mm_Sliding_topH3K27Ac_slide_-100_chr13:59247450	631	597	598	1609	547	1081	1014	1153	1264	1511	591402250	AAGGCATTTGCGCATTTCACTTTTGTTTTCTTTGACTGCCATTTCTAAAAACGGTCTCTGTACTCTTTGGGGATTTTAGGCACTCAAGTTATTCTTTTAAAAGATTTCTGCTGACATCCACGGGTCCTATAATTAACA	mm	chr13:59247450	FALSE	0.984408	1.02725	chr13:59247350	chr9:87656116	-36927	-	uc007qul.1	0.369565	0.0217391	0.883419	1.45332	1.03293	1.04224	1.13712	0.951641	1.16837	1.03759	0.548193	0.429719	0.451807	0.570281	0.856988	0.746194	1	1	FALSE	FALSE	0	0	0	TRUE
mm_Endogenous_chr8:35217635	2232	4726	3080	3485	2010	6217	6645	8568	7543	2847	82922655	AAGGCGGTGCCACGCTAGGGGCGGGGCCGAACGCGACCAGTCACGGACGCCTACGTGCCGCAGCGGCAGTGACGTCAGATTGGCGCAGGACAAAGTAACGTCGCGTCTTGCTGCTGTCAGGTGGTCCCTTTTATGGTG	mm	chr8:35217635	FALSE	3.42381	3.25349	chr8:35217635	chr8:29940680	19	+	Saraf	0.637681	0.115942	1.90317	0.856639	3.15286	4.1105	1.09462	1.33387	1.3799	3.63168	0	0.23494	1	0.76506	0	0.568793	1	1	TRUE	TRUE	0	1	0	FALSE
mm_Endogenous_chr18:23602865	2688	2196	2806	3200	1545	2718	2358	2679	2833	3852	1333081417	AAGGGCCTTGTAGTCTTGGTAGCAGATGTAGTTATTCCAAGATTCTATTTTTGCTTAACAATATCCATCTGTATCATAGGCAGCATATGTTGCCATTTGTCTCACGGTGACAGCTCACTTCATTCATTTTCAGAAAGG	mm	chr18:23602865	FALSE	0.897965	0.903136	chr18:23602865	chr18:32215804	28950	+	ENSMUSG00000024302	0.391304	0.00724638	1.15049	1.02332	1.01877	0.949924	1.715	1.58095	1.64798	0.984345	0.664659	0.110442	0.335341	0.889558	0.900463	0.396103	1	1	FALSE	FALSE	0	0	0	FALSE
mm_Sliding_topH3K27Ac_slide_-60_chr10:90167520	2352	3562	4526	4142	2251	1858	1594	1394	2042	2335	243385642	AAGGGCTGGAGACCAACGAATGTTCAGCACACCCAGGGTATGTGGTACATGGCTGGGCTAGGACTCAAGCCTGAGTTTGTTGGACTCCATGTCTCTTTCCAGAGTGCTCCCCCCACCCCACCCCTCCAGCATGTTTCA	mm	chr10:90167520	FALSE	1.00139	1.07389	chr10:90167460	chr12:99423544	-125187	+	uc007gtd.1	0.557971	0.00724638	1.28085	0.909129	1.14887	0.815414	1.02997	1.75024	1.39011	1.03764	0.548193	0.2249	0.451807	0.7751	0.856988	0.55386	1	1	FALSE	FALSE	0	0	0	FALSE
mm_Sliding_topH3K27Ac_slide_-20_chr10:110827140	46	449	86	424	69	190	191	145	263	266	1660385535	AAGGGTAGCCACCACTTTCAAGACCACATGTTCCCACAGCACACGCGGAGATGACGCAACTCACTTAATTGCATTACAAGGCTCTGAGTCACCTGGCACCCTGCCAGCTGACAAATTCCAGGCTGGGCTGTTTCAGAT	mm	chr10:110827140	FALSE	1.0533	1.21413	chr10:110827120	chr12:76577501	-83147	+	Nap1l1	0.521739	0.0217391	5.26716	3.03604	1.0313	0.744541	0.657162	1.08495	4.1516	1.13372	0.359438	0.00401606	0.640562	0.995984	0.735808	0.0770232	1	1	FALSE	FALSE	0	1	1	FALSE
hs_Endogenous_chr12:8129593	1032	1303	1039	1558	320	891	789	1003	973	1028	1952220382	AAGGTCACCTTCCAACTCCAATCTGGCTTCTCTTAGCCCATCTATTCTAGCTCTCTCTTTTCCTTCCCCTCATTCTTCCCCAGAGAGAGGTTGCTATGGGAATGGCATCGTCATAGAAAGCCAGCTGGTAGAGAGAAG	hs	chr12:8129593	FALSE	1.12586	1.16228	chr12:8129593	chr6:122719940	NA	+	ENSG00000206636	0.485507	0.00724638	3.2959	2.40552	1.2514	1.33263	3.17902	2.82634	3.00268	1.29202	0.162651	0.0100402	0.837349	0.98996	0.516062	0.106055	1	1	FALSE	FALSE	1	0	0	FALSE
mm_Sliding_topH3K27Ac_slide_20_chr17:85025780	635	472	777	473	56	320	100	285	120	129	1814141663	AAGGTGGAGAACTACACTTCCCATGAGGCTGCTCTTTGGGACGCAACCTCGGCCGTGACGTCGTTGCCATGGCAACCGAGGAGCCTGCATTCTCTGGCCCAACTAGGTGTTTGCAGCCTGCCTGGGTCAGGGTTGTTC	mm	chr17:85025780	FALSE	1.13714	1.14231	chr17:85025800	chr2:44001126	-15	+	ENSMUSG00000024253	0.586957	0.0434783	6.82234	4.17315	3.58155	3.01757	11.1776	12.0779	11.6278	3.29956	0.00200803	0	0.997992	1	0.0259157	0	1	1	FALSE	FALSE	1	0	0	FALSE
mm_Sliding_topH3K27Ac_slide_60_chr6:146673340	78	146	95	93	22	124	83	76	88	97	1919682680	AAGGTGGGGGTCGGTACTGGCGCTGACGCCAGAAGGACACTTCCGCCTGGGTGCGTATGACGTCAGGGGCGACCCCTTTAAAAAAAAAAATCTAGGAGATCAAGTCTCGCGAGATTCTGGCGCGGCCGCTTTGGCACC	mm	chr6:146673340	FALSE	1.25519	1.11405	chr6:146673400	chr12:27397002	9	+	Stk38l	0.57971	0.0869565	5.37168	2.08858	1.8457	1.07015	3.49491	3.75889	3.73013	1.45792	0.0823293	0.00401606	0.917671	0.995984	0.376849	0.0770232	1	1	FALSE	FALSE	0	1	0	FALSE
mm_Sliding_topH3K27Ac_slide_-80_chr5:86602020	122	99	123	328	99	50	99	81	34	195	401987772	AAGTACGCCCAGGACAGGGTTTCCAGTCAGCCCCTGGGACACCTGACTTCCGGTTGGGGCGGGGCAACGGGGCGCGCTTCCTTGCAGGTGAGGGGAGTGCCTACGTGAAGGCTGCTGAGCGCTGAGGGCAAACGCGGA	mm	chr5:86602020	FALSE	0.744736	0.21411	chr5:86601940	chr4:68567106	32	-	ENSMUSG00000035898	0.65942	0.0724638	0.809431	1.63693	0.370209	0.567352	1.21475	1.08151	1.22318	0.479423	0.993976	0.365462	0.0060241	0.634538	0.998602	0.68335	0.689357	1	FALSE	FALSE	0	0	0	TRUE
hs_Sliding_topH3K27Ac_slide_-20_chr14:60100444	27	21	22	56	53	105	134	135	118	229	1997819635	AAGTAGGCAGGAACTGCCACTATCTTTAAACCAGTAGAGAACAGACGGGCTTTATCTGCAGCCAGCTTAGAACTTGGTTAAGGTGCTTGCCAGGAGAGGAAGTGATTTCTTTACTTTTCAGGATTAAATCATGCATTA	hs	chr14:60100444	FALSE	0.858363	0.632761	chr14:60100424	chr12:73340500	NA	-	RTN1	0.42029	0.00724638	0.320718	0.522039	0.662011	0.805194	0.502171	0.361332	0.431751	0.745562	0.957831	0.955823	0.0421687	0.0441767	0.989773	0.979808	1	1	FALSE	FALSE	0	0	0	TRUE
mm_Sliding_topH3K27Ac_slide_20_chr4:48300480	820	789	688	1312	372	733	701	799	758	675	1578715208	AAGTATGCCAGGATGCGTTTGCCTCCATGGAAACGGATGACTGTCTCTTTCTACTCACACAACTAATTAAATCGAACCCTTTCTGAGCAGCCCATTGTCCTGGAGGAAACTGAAGAGGCCTTCTCTGAGTGAAACATC	mm	chr4:48300480	FALSE	1.52341	1.37898	chr4:48300500	chr9:102871050	7778	+	ENSMUSG00000028344	0.463768	0.0217391	1.71678	1.74254	1.56788	1.61676	2.17287	1.60992	1.8914	1.59232	0.0441767	0.0682731	0.955823	0.931727	0.259246	0.326892	1	1	FALSE	FALSE	0	0	0	FALSE
mm_Sliding_topH3K27Ac_slide_40_chr10:34001950	596	878	920	1092	534	2717	1556	2894	1853	719	1170680923	AAGTCACGAGCTGAAGAACCAATCAGGTGCGCTGCAGGTTCTCGCGAGACTTGCGGGCTGTGGCTCTGGCGTCACTGCGCTGGAGAGAGCGAGGGGCGGAGCTGGGGTTGCGGGGGACCGTGAGGGTTGTTGTTTGTA	mm	chr10:34001950	FALSE	3.17455	3.16475	chr10:34001990	chr6:116601130	35	+	Tspyl1	0.623188	0.0797101	1.33086	1.01035	5.45597	5.49759	1.10019	1.4997	1.29995	5.47678	0	0.291165	1	0.708835	0	0.613609	1	1	TRUE	TRUE	0	1	0	FALSE
mm_Sliding_topH3K27Ac_slide_80_chr11:97311435	152	109	114	426	96	243	190	203	336	329	461621948	AAGTCCCCTCCACACCCATCCTCCCTCCTCCTACCGCCAGGCAGCCGAAGAGAGCCGGGTGGGGGAGAGGGGAAGCTTCAGGGAGGGCTGGCTAAGGGGACTAAGGGACTTAAATCAGCTGTGCAGGGGCCCTAGTGA	mm	chr11:97311435	FALSE	0.847148	1.25411	chr11:97311515	chr17:36621168	122	+	Arhgap23	0.630435	0.0217391	0.919041	2.19245	1.0664	0.842757	1.56076	1.0337	1.55574	1.05063	0.518072	0.136546	0.481928	0.863454	0.834316	0.429664	1	1	FALSE	FALSE	0	0	0	FALSE
mm_Sliding_topH3K27Ac_slide_-80_chr8:108130750	195	172	183	520	160	169	177	277	249	274	1006738087	AAGTGAGGCCACTAAGTAGTCTCCACCCGGTTCCGGGGTGGGGTGGGGGTCTTAGGCCATAGCAGGCCCCCCTCCCCTTTTCAGTGGCAGTTCTGGTTGGCGGCTGCCAGATGACGTCAGCAACTAGGTTTGGGGCAG	mm	chr8:108130750	FALSE	0.947599	1.11594	chr8:108130670	chr16:67564359	1462	+	Fam65a	0.615942	0.0289855	0.870138	1.60574	0.890528	1.3808	1.20137	0.995612	1.23794	1.13567	0.35743	0.355422	0.64257	0.644578	0.735808	0.680186	1	1	FALSE	FALSE	0	1	0	TRUE
mm_Sliding_topH3K27Ac_slide_40_chr19:45635100	106	127	62	80	66	139	123	113	102	178	1676495344	AAGTGATCATCGGTCGGGTAGTTGCCATGGCAGTGGCCCGGCGCGTTCCTGGGCGGAGGGAAGATGGCGGTGACTAGCTGGTTGGAGGTTTTGCGGTCGGCCGAGAAGACGGCACTGCTGCAGGATGGTAACTCGAGA	mm	chr19:45635100	FALSE	1.01365	0.703676	chr19:45635140	chr10:103348072	76	+	Dpcd	0.615942	0.0869565	1.55754	0.598876	1.12747	0.867083	1.58316	0.817724	1.20044	0.997278	0.64257	0.39759	0.35743	0.60241	0.898186	0.71449	1	1	FALSE	FALSE	1	0	0	TRUE
mm_Endogenous_chr6:4347775	328	375	178	915	140	174	391	258	308	228	2032927436	AAGTGATTGAATTCTTTACATGAGCACAGCACAAGCTCGCAGGCTGCGTGCGTCATTGGGCTCTGGTTGCTAGGAAATCCATGAATAGAACCTAATATGCATTCAGCAACAGGCTGCCGACGCCATCCATCTCCACGG	mm	chr6:4347775	FALSE	2.51561	1.65886	chr6:4347775	chr7:93905513	14898	+	ENSMUSG00000087863	0.5	0.0434783	2.16812	3.22912	1.10186	1.54556	2.30945	1.10675	2.69862	2.08723	0.0140562	0.0120482	0.985944	0.987952	0.130419	0.106055	1	1	FALSE	FALSE	0	0	0	FALSE
mm_Sliding_topH3K27Ac_slide_40_chr12:68321865	91	133	123	343	78	160	116	137	151	243	1840846133	AAGTGTAAATCAAATGCCACGCCAGGAGGGGCCCCGGAACGGCGCGAGTCGTGTATCTTAGCTCAGCAGCCTATCTTGCCTAGGAATCACAAGGTCACGATAGCGTCGCGATTCCACTCACCGTACACTCCTTGGCCA	mm	chr12:68321865	FALSE	0.700251	0.763068	chr12:68321905	chr14:48143628	-291	-	ENSMUSG00000034912	0.557971	0.0797101	1.38018	2.17265	0.95066	0.770046	1.15003	1.37268	1.77642	0.860353	0.869478	0.0823293	0.130522	0.917671	0.968815	0.350666	1	1	FALSE	FALSE	0	0	0	FALSE
hs_Sliding_topH3K27Ac_slide_-100_chr17:36621168	97	188	84	198	141	272	363	345	334	511	1918408327	AAGTTCTGCTGCCCAGGCTGGGGTGGGCTGGCAGCGCCAGATGACAGCATCTGGGGGCCTCCACTGGCCCCCGCATCTCTGCCAGCCGGAGGGTGGGGCCCAGGCATTCCTGTGGTTGGAAGCCAAGGCTGGAGGCCA	hs	chr17:36621168	FALSE	1.04205	0.802636	chr17:36621068	chr11:97311435	NA	+	uc002hqc.3	0.681159	0.0217391	1.07924	0.693805	0.768527	0.922148	0.678135	0.518584	0.886523	0.922342	0.773092	0.720884	0.226908	0.279116	0.931695	0.909709	1	1	FALSE	FALSE	0	0	0	TRUE
hs_Sliding_topH3K27Ac_slide_40_chr21:38282276	75	164	73	666	70	123	240	137	267	133	1461515643	AATAAGATTAGTTGTGCTTCAGTCATAACATCGTAAGTTGCTAGGCAGCCAGAAGTGAGTTAATCAGAAAATGAATCATCAAAGACATGGTACGCAATCTCCTTTTATGGGTGTCTCATTCTTAAAACACTTTCAAGG	hs	chr21:38282276	FALSE	2.64705	2.4652	chr21:38282316	chr16:94458590	NA	-	ENSG00000159267	0.369565	0.0144928	1.89638	4.70075	1.33526	1.40693	1.05615	0.907787	3.29857	2.55612	0.00200803	0.0060241	0.997992	0.993976	0.0259157	0.0847571	1	1	FALSE	FALSE	0	0	1	FALSE
mm_Sliding_topH3K27Ac_slide_-100_chr13:53075665	115	89	71	136	134	245	229	275	360	269	1179551030	AATAAGGATCTAATAGCCAACGCTGCGCTAAAATGACCAAATCATTGCACACAAATCACACGCGCACATTCTCACATCAGTTCGTCCTCGGTGCCCACGTTTCATCGCTGGCCCATTATGCAATGTAAGAAAGGACAC	mm	chr13:53075665	FALSE	1.24878	1.6434	chr13:53075565	chr9:94185332	-943	-	Nfil3	0.463768	0.057971	0.537607	0.501447	1.315	1.39631	0.845973	0.461225	0.653599	1.44609	0.0863454	0.86747	0.913655	0.13253	0.384467	0.950006	1	1	FALSE	FALSE	0	0	0	FALSE
hs_Sliding_topH3K27Ac_slide_-60_chr20:48732577	704	346	808	573	162	385	258	504	374	307	477408554	AATAATAATTCCCGTGCCGAGCTCATCGCAGGAAGAGGTTAGGCGGGACAGCCCGAGGCATGCTGGTTGTTGTAGTCTAGCGTTGGCGCAGTGCCTGATGGGAGTTGTAGTACGTCCCGCGCACACGCTCCCTCGAAG	hs	chr20:48732577	FALSE	1.23277	1.49598	chr20:48732517	NA	NA	-	UBE2V1	0.57971	0.0869565	1.72878	1.74755	1.81065	2.2423	4.28372	4.34166	4.31269	2.02648	0.0140562	0.00401606	0.985944	0.995984	0.130419	0.0770232	1	1	FALSE	FALSE	0	0	0	FALSE
mm_Sliding_topH3K27Ac_slide_80_chr13:59247450	220	184	252	593	351	773	732	831	823	947	379340050	AATACAGAACCCCTTCCTGATCTTCCTCCAGTCTTGTTTTAGGAACCATCAGACCACATCCCACTCCTTCCACTCCGTTCTCTCTTGACAGAATACATCCACACCTCAGATGTGAACGTTCAAGCCTTTTTCTTTTAT	mm	chr13:59247450	FALSE	1.13387	1.06719	chr13:59247530	chr9:87656116	-36567	-	uc007qul.1	0.442029	0.0144928	0.424317	0.834716	1.17853	1.19854	0.617844	0.624961	0.629516	1.18854	0.279116	0.881526	0.720884	0.118474	0.669139	0.957986	1	1	FALSE	FALSE	0	0	0	TRUE
mm_Sliding_topH3K27Ac_slide_20_chr13:75227245	154	133	86	354	135	368	643	407	921	484	637201518	AATACCATCCAGTTCTCAGTCCAGGTAGATCTGACGTCAAGAGATGGCTTTCGTCGATTTGACGTGTAAACACTCATTTCTATTCTGGTTGGTAAGGCTGGGGCTCCACTCAGTCGGGAGACTGAAGCACTTTAGTGA	mm	chr13:75227245	FALSE	1.9488	2.33672	chr13:75227265	chr5:95769021	12	+	ENSMUSG00000021587	0.471014	0.0362319	0.797439	1.29557	1.09778	1.14855	1.12448	0.554528	1.0465	2.14276	0.0120482	0.538153	0.987952	0.461847	0.125719	0.807817	1	1	FALSE	FALSE	0	1	0	FALSE
hs_Endogenous_chr1:61707930	320	234	282	560	215	231	186	226	253	345	1564075590	AATACCGGATGCAGGGTCCAACTTTTCAGACACTTGGCATGAGCTCAATAGGGATCTCCAGGCTACACAGGAGACAGTGTGTGTGCTTGGATGCTTTTAAAATTCTTGGATAGGTGGAGCATACTACTTCTGCTGGCA	hs	chr1:61707930	FALSE	0.790853	0.900522	chr1:61707930	chr4:97591305	NA	-	ENSG00000237853	0.471014	0.00724638	0.880962	1.28689	0.966728	0.894729	1.46715	1.14175	1.30445	0.930729	0.763052	0.289157	0.236948	0.710843	0.929525	0.613609	1	1	FALSE	FALSE	0	0	0	FALSE
mm_Sliding_topH3K27Ac_slide_60_chr5:67359515	438	247	250	520	416	722	727	862	884	1222	1333246477	AATACGAGGGTGAGGATGGCTTCGACTGACCTTTCTTCTGCTGGAGTCTCAGTGTTTTAGTCTGTGCCGCTTGTGCTGGAAAGAATTTATAATCACAGCCTGTCAAAGACAGGCATTGTTCTCCCTGCTCTGAACATG	mm	chr5:67359515	FALSE	0.8727	0.888329	chr5:67359575	chr4:41614621	-19	+	Limch1	0.471014	0.0217391	0.480599	0.617591	0.853055	0.963471	1.03787	0.523125	0.780499	0.908263	0.795181	0.785141	0.204819	0.214859	0.939063	0.923711	1	1	FALSE	FALSE	0	0	0	TRUE
mm_Sliding_topH3K27Ac_slide_20_chr8:87500565	2596	6091	3173	7398	2087	2842	4583	3934	4118	4188	2005994418	AATAGGCCCATATATGGGCAGAGCTTCCGTAACGTCAGCGGGGAAAGCCCCGGCGCACTCTGCTGGGCGGGGTCATGCTTGCACATTCCGCGTTTTGTCCTGGGTAGCTTGTTCCCCGCCACTGCCCGCCTGCGCAGC	mm	chr8:87500565	FALSE	1.60526	1.20746	chr8:87500585	chr19:12904420	169	-	uc009moo.1	0.630435	0.0797101	2.36236	1.75139	0.97978	1.28301	1.22616	1.32345	2.05687	1.40636	0.0963855	0.0481928	0.903614	0.951807	0.396927	0.28476	1	1	FALSE	FALSE	0	1	0	FALSE
mm_Sliding_topH3K27Ac_slide_-20_chr6:115803490	34303	39170	36896	56697	22207	37949	34760	53441	38472	35941	662125579	AATCAAACCCTCTGTCGTCAAGACTCCCCGCCCCACCCACCTTTCCGGACCAATCGCTCGTGTCATACTTACGCTTCCGCCTCCTGCGTCCCTACGCGCCCGGCGCTTCGGCGGAGGAGGTGGGCTCCCTTTTGTACA	mm	chr6:115803490	FALSE	1.4187	1.31446	chr6:115803470	chr3:129158957	-37	+	ENSMUSG00000030323	0.623188	0.101449	1.42772	1.26142	1.52448	2.03089	1.52267	1.44627	1.48447	1.77769	0.0220884	0.178715	0.977912	0.821285	0.162375	0.501658	1	1	FALSE	FALSE	0	0	0	FALSE
mm_Sliding_topH3K27Ac_slide_-60_chr18:23602865	50	21	24	128	25	34	61	92	80	60	1739961738	AATCACGCTTCTTTTTAATATCATTAACAATCTTATTAGAAATGACTGTTTAGTTTTGGGAAGGGCCTTGTAGTCTTGGTAGCAGATGTAGTTATTCCAAGATTCTATTTTTGCTTAACAATATCCATCTGTATCATA	mm	chr18:23602865	FALSE	1.49135	1.63731	chr18:23602805	chr18:32215804	28830	+	ENSMUSG00000024302	0.311594	0.00724638	0.679922	2.52965	0.818161	2.0943	1.97149	0.835661	1.60479	1.56433	0.0502008	0.12249	0.949799	0.87751	0.280227	0.415933	1	1	FALSE	FALSE	0	0	0	FALSE
hs_Sliding_topH3K27Ac_slide_20_chr4:13853090	40	32	31	124	68	198	234	278	250	289	633508212	AATCACTGAAACAGGCCATTATTCTTTTTGCTTAACCAATTTCACAGGCCCCGCACAAAGCACTGCCTTCATTTGGCTTCCTATAATTGCTTATCATTAGGCCCAGCCGCCCCACGAAGTACCTTTTAATTTATTTAA	hs	chr4:13853090	FALSE	1.18774	1.06227	chr4:13853110	chr5:42458975	NA	+	ENSG00000250634	0.413043	0.0217391	0.380908	0.900957	0.989188	1.31386	0.579849	0.396837	0.640933	1.15152	0.337349	0.869478	0.662651	0.130522	0.72202	0.950006	1	1	FALSE	FALSE	0	0	0	TRUE
mm_Sliding_topH3K27Ac_slide_-100_chr11:103559390	709	868	585	744	214	685	513	599	401	534	17059548	AATCAGGTAGCGGAGAGGACGGTCGCGAGGCACTGACGTCAGAGCCTCCCCCGAGAAGTCGCCGGCGACTCTCTACGTCGCTCTCCGCCCCGCGGTCGGGCTTGGCTTCTCCTTGGAGTGTGTAATTACAGGTCTGGG	mm	chr11:103559390	FALSE	1.40922	0.922138	chr11:103559290	chr17:45000088	-22	-	ENSMUSG00000020946	0.637681	0.108696	3.28311	1.71771	1.85208	1.5321	3.26585	2.37959	2.82272	1.69209	0.0341365	0.0100402	0.965863	0.98996	0.221115	0.106055	1	1	FALSE	FALSE	0	1	0	FALSE
mm_Sliding_topH3K27Ac_slide_60_chr10:34001950	145	129	199	184	68	366	194	418	266	156	1423875254	AATCAGGTGCGCTGCAGGTTCTCGCGAGACTTGCGGGCTGTGGCTCTGGCGTCACTGCGCTGGAGAGAGCGAGGGGCGGAGCTGGGGTTGCGGGGGACCGTGAGGGTTGTTGTTTGTAGGCGGAGGTCTGCGCGACTA	mm	chr10:34001950	FALSE	1.82423	2.09387	chr10:34002010	chr6:116601130	75	+	Tspyl1	0.652174	0.0942029	1.53554	1.3369	3.38741	3.65977	2.10195	2.54744	2.32469	3.52359	0	0.0220884	1	0.977912	0	0.164489	1	1	TRUE	TRUE	0	1	0	FALSE
mm_Sliding_topH3K27Ac_slide_80_chr14:55136340	341	356	312	640	117	206	183	270	165	230	527402593	AATCCGCAATTCTCACAGTGACGTGGGCGTGGCTCCCCACCAATGACAGACTCTCATTGGTGTCGCTCAGCAATCTCCCAGAATGCCCAGTCCATTTGTAGCACTCTAGTGAGACTACAGGTCCCAGGAGCCCCCGCA	mm	chr14:55136340	FALSE	1.16715	0.880945	chr14:55136420	chr14:23398715	138	-	ENSMUSG00000023110	0.557971	0.0362319	2.46288	2.70262	1.29316	1.60339	2.87298	2.32128	2.59713	1.44827	0.0843373	0.0120482	0.915663	0.987952	0.378471	0.106055	1	1	FALSE	FALSE	0	0	0	FALSE
mm_Sliding_topH3K27Ac_slide_80_chr5:31593600	169	98	147	455	292	438	473	554	571	767	162859448	AATCCTGTGGCTGCATGCAAACCTAACGCAAACCTCCGCCCACAAGTCTTCGGTCCTCTCCGGATTCTACGTCACCATATCCTTACGTTTTCTTATTGTCCTACCCGGCCAGATGTGCTTTAGTTGCTTAAACTCTGG	mm	chr5:31593600	FALSE	0.904623	0.914184	chr5:31593680	chr2:27712733	273	-	Ift172	0.492754	0.0507246	0.271658	0.769874	0.824499	0.986545	0.570515	0.438221	0.520766	0.909403	0.793173	0.925703	0.206827	0.0742972	0.938305	0.968588	1	1	FALSE	FALSE	0	1	0	TRUE
mm_Sliding_topH3K27Ac_slide_20_chr15:103103210	1185	644	1039	1506	974	1040	960	1008	1296	1569	1897153502	AATCTAACAGCTGCCTCTTCTGGCTGGACAGTTGGCTTCCGTGAAGCGAGTGACTACGCTGACTGGTCAAGACGCGAAGGCTGGCTCATCTTCACCCAATGTTGCCTCTTTGAGGCGGGACCTAGCGAAGACTCAGGG	mm	chr15:103103210	FALSE	0.897532	1.01432	chr15:103103230	chr12:54718806	-91	+	ENSMUSG00000060992	0.557971	0.0507246	0.535188	0.763936	0.957021	0.877486	1.19929	0.928572	1.06393	0.955926	0.714859	0.52008	0.285141	0.47992	0.912309	0.79412	1	1	FALSE	FALSE	0	0	0	TRUE
mm_Sliding_topH3K27Ac_slide_40_chr15:50497670	70	23	44	115	56	76	50	54	82	127	1316961053	AATCTATCACTAAAAAGACCTGGTGAGCAGCCAGCTCCCTATAGGGTAATTTTTCCATCCAGATGCAAGTGCTATCAGAGGCCCTCGTCAGCTAAACTAATTATGATCTTGCAATTGCTGATGCCTGCCCACTCTAAC	mm	chr15:50497670	FALSE	0.577521	0.792872	chr15:50497710	chr8:116432002	-161317	-	ENSMUSG00000038679	0.449275	0.00724638	0.332445	1.01461	0.864015	0.580754	1.23218	0.683949	0.958064	0.722385	0.963855	0.654618	0.0361446	0.345382	0.989773	0.880951	1	1	FALSE	FALSE	0	0	0	TRUE
mm_Sliding_topH3K27Ac_slide_-40_chr18:67697035	615	841	579	1504	449	551	1022	948	748	1255	694430666	AATCTATTCAAGCAGCAATCGGATCGCTAACATGCATCTCAGTGTGAGTTAACATGTAGTCTGCACTATGTATGACACAGCTAGCTTTGGCTCTTTGCTTGACCAGAGATGGTAAGATTGAAAATATTTACATTTGAT	mm	chr18:67697035	FALSE	1.19456	0.731898	chr18:67696995	chr18:12521000	-11872	-	Spire1	0.384058	0.0144928	1.5161	1.65498	0.633898	1.03173	1.35018	1.12251	1.58554	0.963231	0.704819	0.126506	0.295181	0.873494	0.912309	0.421237	1	1	FALSE	FALSE	0	0	0	FALSE
hs_Sliding_topH3K27Ac_slide_-100_chr4:39184053	62	137	132	110	63	141	153	185	133	215	1781093846	AATCTCATCCAATCAGAGCCAGCCAGGAAGCCGAGGCTCAGCAAGGCCTCGCGACGCCCAACTTCCCAGGGTTAGCGTCTCTGATGTCATGTGATTCCACCCTCCGCCTCTCACCCACCCTCGCAGAGGGCGGTGCGC	hs	chr4:39184053	FALSE	1.04389	0.759637	chr4:39183953	NA	NA	+	WDR19	0.623188	0.0652174	1.76019	0.862667	0.946873	1.17526	0.970096	1.82386	1.39698	1.06107	0.502008	0.222892	0.497992	0.777108	0.831533	0.55328	1	1	FALSE	FALSE	0	1	0	FALSE
mm_Endogenous_chr5:72378455	21	21	21	28	29	142	217	196	142	329	319094608	AATCTCTTTTCTCCTGTGATGCCAATTCATGATAAATGCTCACAAAGGCATGACAATTTCAGTTGCCAGACCATCTGGCTACTAGATGTTTCATCATAGATTCTATAGCCAAGAGCTTCATCAGTTGCCCTGTTTCTA	mm	chr5:72378455	FALSE	0.967533	0.530011	chr5:72378455	chr4:47280792	-46272	-	ENSMUSG00000080736	0.398551	0	0.586139	0.477036	0.623166	0.813697	0.713814	0.630348	0.672081	0.748772	0.953815	0.851406	0.0461847	0.148594	0.989773	0.945914	1	1	FALSE	FALSE	0	0	0	TRUE
mm_Sliding_topH3K27Ac_slide_80_chr15:34759020	583	326	388	1079	359	990	816	1011	1137	1336	1066503248	AATGAAAAATTAGCTTAATTTTTTGGCTGCAGGAAAAAGTGTGAATTGGTTTTCTGTCACTCGTAGGAACATCTTGTGTCTTCCCTCAGCTGGGTATCTGATGGGATTGCTTCTTCCCACCCTCCGGAAGGCCTCTGA	mm	chr15:34759020	FALSE	0.895954	1.04507	chr15:34759100	chr8:99428985	-7929	+	Kcns2	0.442029	0.0144928	0.735026	1.48497	1.06989	1.03359	1.6008	0.940798	1.2708	1.05174	0.518072	0.315261	0.481928	0.684739	0.834316	0.63552	1	1	FALSE	FALSE	0	0	0	TRUE
mm_Sliding_topH3K27Ac_slide_60_chr7:4076135	529	341	524	624	169	375	301	356	401	388	1271232396	AATGAAGAAGCTGGGAGGATGGGTATGTGTGTAGAGGCATGGTGACACCCTCCAGGGTCTGAGACTGGTTGGTATTTCTTCTTCCTTTCCCTTCAGTGCCGGCATTGGCATTGGTTTCTATGGTAACAGCGAGACCAG	mm	chr7:4076135	FALSE	1.13799	1.26913	chr7:4076195	chr19:54932365	150	+	ENSMUSG00000030428	0.507246	0.0144928	1.63323	1.82427	1.39544	1.2532	3.08555	2.69901	2.89228	1.32432	0.14257	0.0100402	0.85743	0.98996	0.486213	0.106055	1	1	FALSE	FALSE	1	0	0	FALSE
mm_Sliding_topH3K27Ac_slide_-20_chr18:23602865	117	138	110	246	65	74	86	113	108	137	715096342	AATGACTGTTTAGTTTTGGGAAGGGCCTTGTAGTCTTGGTAGCAGATGTAGTTATTCCAAGATTCTATTTTTGCTTAACAATATCCATCTGTATCATAGGCAGCATATGTTGCCATTTGTCTCACGGTGACAGCTCAC	mm	chr18:23602865	FALSE	0.920831	0.968046	chr18:23602845	chr18:32215804	28910	+	ENSMUSG00000024302	0.398551	0.00724638	1.71848	1.86988	0.77987	1.12658	1.77434	1.47312	1.79418	0.953223	0.716867	0.0763052	0.283133	0.923695	0.913514	0.334554	1	1	FALSE	FALSE	0	0	0	FALSE
mm_Sliding_topH3K27Ac_slide_40_chr8:87018800	1022	1570	949	2272	414	1183	1184	1086	1378	1135	23700317	AATGAGATGTGGCCCGTTGCCATGGAGATGTGCCGGATGGAAAAGCCCCAGCTAGCAGGAACACGTCACGGGGCTGGAACAGTCAGTGTGAAGTTGGTGTATCTATTTTCAACCTAGAGTTACAAAAATACATTTTCA	mm	chr8:87018800	FALSE	1.53023	1.49089	chr8:87018840	chr19:13519872	33492	+	uc009mmm.1	0.471014	0.0289855	3.06958	2.71143	1.50487	1.30688	2.4334	1.99538	2.89051	1.51056	0.064257	0.0100402	0.935743	0.98996	0.327291	0.106055	1	1	FALSE	FALSE	1	0	0	FALSE
hs_Endogenous_chr14:56583399	200	432	128	628	228	312	308	272	188	468	441454272	AATGCAGCCAGAACAGTATAATGCAATGCAACGCACACAGGCACAGCAGGCCAAGAGAGAAGGAAGGAGGTAATGGTAGCCTAGAGAGCAGAAGCAGCAACAGAGGAGGCCTAGAGAAGCTAGGGTGACAGAGGCAGG	hs	chr14:56583399	FALSE	0.965399	0.493293	chr14:56583399	NA	NA	+	ENSG00000139946	0.528986	0.00724638	1.53366	1.36087	0.962543	0.793826	0.864686	0.488691	1.44726	0.878184	0.843373	0.194779	0.156627	0.805221	0.959662	0.521996	1	1	FALSE	FALSE	0	0	0	FALSE
mm_Sliding_topH3K27Ac_slide_-20_chr4:48767805	184	222	238	325	159	584	517	533	600	644	805574419	AATGCGGCGCCTGGGTGAACAAGGAAGATAGATATTTTTAGGGAGACTCTCTCTCCTTTGGAACAGGAACAGAGCACCTGCTAAATCTGGCACAAAGCGATGACTGCTCCCTGGCAGACTCGCATACAGATGCCTGAC	mm	chr4:48767805	FALSE	1.17762	1.14408	chr4:48767785	chr9:103437165	-8069	-	ENSMUSG00000093240	0.507246	0.0289855	1.13015	1.0099	1.3093	1.13043	1.14073	1.30298	1.22186	1.21986	0.230924	0.365462	0.769076	0.634538	0.606086	0.68335	1	1	FALSE	FALSE	0	0	0	TRUE
hs_Sliding_topH3K27Ac_slide_-80_chr10:105156355	520	639	698	849	343	507	459	454	478	596	1610731508	AATGTAACCACCTCTCGGCCCGGCCGGAAGAAGCCACCTCCCCCGCACGCGTTTAGCCGGCCCCCGCGATTCGGCCTAATGCGACGATTGGCTATGGCTCCAAATCCCGCCCTTCCGATTCCTGTCTCTAGGTCACCT	hs	chr10:105156355	FALSE	1.12971	0.98486	chr10:105156275	chr19:47165255	NA	+	ENSG00000148843	0.623188	0.101449	1.50795	1.22294	1.22821	1.04043	1.49442	1.77142	1.63292	1.13432	0.359438	0.11245	0.640562	0.88755	0.735808	0.396103	1	1	FALSE	FALSE	0	0	0	FALSE
hs_Sliding_topH3K27Ac_slide_-100_chr17:34135976	44	58	35	104	65	393	360	376	520	462	279161847	AATTAAATGAGATGATGTAAGGTGCCTGACAATTAAGAGTCAGCTATTATTATAGTGCTGAAAATTAAAGCTCGATCCCTCCGCCCCGCCACATTCTCAGGGTCAGATTCGTGTACGATTTCGTTTTAATGTACCCTT	hs	chr17:34135976	FALSE	1.14304	1.38215	chr17:34135876	chr11:83286105	NA	-	ENSG00000267578	0.405797	0.0434783	0.722261	0.790517	1.22818	1.1116	0.667272	0.46872	0.756389	1.26259	0.192771	0.809237	0.807229	0.190763	0.56322	0.928905	1	1	FALSE	FALSE	0	1	0	TRUE
hs_Sliding_topH3K27Ac_slide_-100_chr21:34437086	1751	2056	2669	4166	1050	2893	2705	2640	2998	3573	623840234	AATTCATCATTCACTCCTTTCTGAAAACCTAGAATGAAAAAGTTTAGCAGCTCAGCGCCGCGGCCTCTCTCCATTCTCTCCCCAAACACATCGGCCTGTTTGTTCTCTTTCATCCCCGCTCTTCCTGTTGCATTCTGC	hs	chr21:34437086	FALSE	1.11054	1.03037	chr21:34436986	chr16:91263240	NA	+	OLIG1	0.478261	0.0362319	1.58494	1.96029	1.16903	1.00919	1.64384	2.21268	1.92826	1.08911	0.443775	0.064257	0.556225	0.935743	0.799727	0.326851	1	1	FALSE	FALSE	0	0	0	FALSE
mm_Sliding_topH3K27Ac_slide_-20_chr12:3823565	145	261	117	399	114	753	1465	639	1610	701	1883269761	AATTCCAGCTCTCTCACAGCAGCTATTTTGGGCATAAACCTTTTATTCTCTCTGCGTTAGGGGCTGTGCCATGGTAACCATTAGCGCAAGCAAAGGAGTCTGTGATTCAGACTCATCCCCTCCCCTGCGGCTGCCATA	mm	chr12:3823565	FALSE	3.06564	2.82034	chr12:3823545	chr2:25547957	16366	+	Dnmt3a	0.5	0.0217391	1.85317	1.72926	1.55092	1.24505	1.2538	0.893388	1.79121	2.94299	0.00200803	0.0783133	0.997992	0.921687	0.0259157	0.337327	1	1	FALSE	FALSE	1	0	0	FALSE
mm_Sliding_topH3K27Ac_slide_40_chr13:51676150	759	490	772	479	163	486	292	473	420	317	1285057321	AATTCCTGCAGACTCCTCCTGCCGGCTTCCTCTCAGCAAGTCACAATGTGTTTCCATGGCAACCCTGTTGCTAAGGGGGGACCCCATAAGTACATCAGTGTGGTGTCTGCAGCCTGGAGAGGGAGTTAGCCTGAGAGG	mm	chr13:51676150	FALSE	1.35122	1.62698	chr13:51676190	chr9:91833070	13777	-	Shc3	0.550725	0.00724638	2.43326	1.45191	2.21354	2.038	4.59005	4.12277	4.35641	2.12577	0.0140562	0.00401606	0.985944	0.995984	0.130419	0.0770232	1	1	FALSE	FALSE	1	0	0	FALSE
mm_Sliding_topH3K27Ac_slide_20_chr5:35363250	172	94	202	424	295	346	350	422	371	633	703062426	AATTCTGCCTAAACATAGTCTGCATAAATGCCTCGCCACAGAGCCTGGCAGTGGTGGCACTTGACGTTGGGTTGGGTAAGAAGGAACAGTGTTTGAAGAGACTTGGAGAAGCACTCTGGCAAACTGCAGCCTCTACCT	mm	chr5:35363250	FALSE	0.811085	0.719719	chr5:35363270	chr4:3417123	-407	+	Mir3097	0.5	0.0144928	0.25792	0.710125	0.789194	0.910565	0.574738	0.596058	0.585398	0.84988	0.889558	0.901606	0.110442	0.0983936	0.976353	0.960948	1	1	FALSE	FALSE	0	0	0	TRUE
mm_Sliding_topH3K27Ac_slide_-80_chr16:9281175	43	34	23	63	34	101	116	223	112	217	2112145338	AATTCTTTATAGATTTCCATCAGCGACTAAATTTGTGTTTTGAGTTAAAATTGGGCATTCAGAGGAACTGCCTTGGGATACTCTGCTCTCTCGGAGCCCCTCCTCCACACTGGCAGCTGCTGACCTCCTGTTCACTAA	mm	chr16:9281175	FALSE	0.784152	0.633798	chr16:9281095	chr16:9583844	284556	-	ENSMUSG00000090530	0.456522	0.0144928	0.809431	0.915488	0.672006	1.40361	1.24667	0.588855	0.917765	1.03781	0.548193	0.686747	0.451807	0.313253	0.856988	0.889661	1	1	FALSE	FALSE	0	0	0	TRUE
mm_Sliding_topH3K27Ac_slide_-20_chr7:71833430	233	175	124	548	138	391	331	368	367	491	950005946	AATTGAGTCTGGACACAGGGTCTCATTTTCTTGGACATGTAGCGGGTAATCGTGCTTCCCCTGTAACGTTCAAATAGCTTTCCAGATGGTCTGTTACGAAGGATCTGTCTTTAATATGACTAATCAGAAGCAAAGGAC	mm	chr7:71833430	FALSE	0.988891	0.917862	chr7:71833410	chr15:29336675	53474	+	ENSMUSG00000030519	0.427536	0.0289855	1.02645	1.96197	1.14976	1.02369	1.66433	0.782171	1.49421	1.08672	0.451807	0.176707	0.548193	0.823293	0.804725	0.501658	1	1	FALSE	FALSE	0	0	1	FALSE
hs_Sliding_topH3K27Ac_slide_-60_chr6:157101746	127	130	87	337	171	448	411	427	369	502	1954777153	AATTGTGGAGGTAAACTGGCTGTAATAGTCTCCAGACAGCTGCCTCTGAGTTGACATCTAATCTGCCATCTGATTGGCTCCCCTCTCACCATTGGGCATTTAGCACTGCTGATGTAAATAGAAGTGCTGAGCAGTACA	hs	chr6:157101746	FALSE	1.20099	0.902642	chr6:157101686	chr17:4997505	NA	-	ENSG00000270487	0.463768	0	0.615357	0.973699	1.2885	1.16179	0.732101	0.442876	0.794528	1.22515	0.2249	0.777108	0.7751	0.222892	0.598048	0.921206	1	1	FALSE	FALSE	0	0	0	TRUE
hs_Sliding_topH3K27Ac_slide_40_chr9:93862665	99	38	53	161	77	163	126	163	131	177	972151895	AATTTAGCCGCGGGTTTGCTATTTAAAGATCTGTTACAGCACCCTTTCCTGTAGCCACAATGAACACACAACAAAGTATCATGTGTCTGATTAAATGTTTAATCATCGCTGTTGAGCTTGCCGACTGTGGCAAAGATT	hs	chr9:93862665	FALSE	1.04424	0.908847	chr9:93862705	chr13:52861205	NA	-	ENSG00000230537	0.405797	0.0289855	0.399459	1.03306	1.32961	1.25781	1.26738	0.599162	0.933273	1.29371	0.162651	0.676707	0.837349	0.323293	0.516062	0.885678	1	1	FALSE	FALSE	0	0	0	TRUE
hs_Sliding_topH3K27Ac_slide_-60_chr1:225783419	185	60	81	160	94	312	365	381	376	413	1587466026	AATTTTTATTCCCATGTGTTAGGATCTCTTCATTTGTAGCAGCTGACTATCAGCTGGCATAGGACCCAAATCATGATCCTACTGCTCCAAGTAATTCACATACATCTCCAAGCAACAGCTGTGTAATCTTTATAGTAT	hs	chr1:225783419	FALSE	1.29642	1.11797	chr1:225783359	NA	NA	-	ENSG00000154380	0.384058	0	0.516658	0.840975	1.09073	1.26002	1.94003	0.750095	1.34506	1.20719	0.246988	0.269076	0.753012	0.730924	0.626689	0.603625	1	1	FALSE	FALSE	0	0	0	FALSE
mm_Sliding_topH3K27Ac_slide_60_chr7:71833010	365	211	166	591	317	577	565	588	800	1158	1171159285	ACAAAAACGTATTATCTTTGTAACACGTGAGGCCACCCTGGAAGATGGAAGTGGTCTTGGCACCAGCCTGGCTGTGTCCATATGCTTTGATTTTACCCAGGCTGGACACTGGTGATTGAATAGCTGTTCTCATCTCTG	mm	chr7:71833010	FALSE	0.715718	0.848348	chr7:71833070	chr15:29336242	53214	+	ENSMUSG00000030519	0.471014	0.0144928	0.538769	0.921127	0.719413	0.693539	1.135	0.455835	0.795419	0.782033	0.935743	0.777108	0.064257	0.222892	0.989346	0.921206	1	1	FALSE	FALSE	0	0	0	TRUE
hs_Sliding_topH3K27Ac_slide_-80_chr9:104296048	272	483	304	552	224	126	186	180	158	321	1940069892	ACAAAAGCCAAGGGCTCTCCGTCAGGCATCAGCGAGGCCCGAGTACTCTTAGAGGTCGTAGCCAGGAGAGGGTCCCGCGCTTGCCCAGCGTTGCTAGGGAGGCGGCGCTTGCTCAAGCTTCTCGTGCCCTCTCCGTAC	hs	chr9:104296048	FALSE	0.849982	0.604428	chr9:104295968	chr4:49644870	NA	+	RNF20	0.630435	0.0797101	1.74533	1.21754	0.566731	0.765896	1.19697	1.18137	1.48144	0.727205	0.961847	0.178715	0.0381526	0.821285	0.989773	0.501658	1	1	FALSE	FALSE	0	0	0	FALSE
hs_Sliding_topH3K27Ac_slide_80_chr10:38146595	1467	1994	1517	2052	893	1410	963	1214	1585	1548	1351634146	ACAACAAACGTCACACGCTACGCACGCGCGTGCTGTCCCCTCCCCGCAGCCAGTTCCCTCCCCTTCGGGCCAGTGCGCATTGCCTACCCCGTGCTACAGGACTTCGCTGAGCGCCAGGCGCAGGGACTGGACGCATAC	hs	chr10:38146595	FALSE	0.912551	1.25734	chr10:38146675	NA	NA	-	ZNF248	0.65942	0.101449	1.8074	1.13532	1.3151	1.07115	1.61936	1.47874	1.54905	1.19313	0.269076	0.140562	0.730924	0.859438	0.651438	0.438284	1	1	FALSE	FALSE	0	0	0	FALSE
hs_Sliding_topH3K27Ac_slide_20_chr12:46660828	37	59	36	159	88	327	424	377	479	507	2060677854	ACAACGAGGCCAGCCATGCACCGAGCTCAGGTTTTATTTCCGTTGTCCTTCTGACGTCAGAAAAAGCACGAGTTGCTGCACAGTTTCTTTTATCAAGGTGACAAATTACACCCTCGCTGGGCCCTGCATTCTGCAAAC	hs	chr12:46660828	FALSE	1.22676	1.16017	chr12:46660848	chr15:96471305	NA	-	SLC38A1	0.492754	0.0434783	0.542686	0.8927	0.931217	1.01563	0.41446	0.356106	0.717693	1.19346	0.269076	0.821285	0.730924	0.178715	0.651438	0.929292	1	1	FALSE	FALSE	0	1	0	TRUE
mm_Sliding_topH3K27Ac_slide_-20_chr16:31275570	56	169	67	270	139	299	252	331	415	460	1245393730	ACAAGTGTGTGAACCTTCAGTGAGAGACCTGCTGTCTACTGTACTACAGATTTATACTGCCCAGCCCTCTCCCATCGCCCTATGAGGCCATTTTTATATTGCTGTCTTATGACAGAAAACTGAGGCTCACGGGTGACT	mm	chr16:31275570	FALSE	0.803609	1.10786	chr16:31275550	chr3:195270376	167	-	Ppp1r2	0.471014	0.0144928	0.984128	0.95971	0.938479	0.982817	0.397134	0.419584	0.971919	0.960648	0.704819	0.646586	0.295181	0.353414	0.912309	0.880951	1	1	FALSE	FALSE	0	0	0	TRUE
mm_Sliding_topH3K27Ac_slide_-80_chr2:38806145	1345	1862	1278	2944	1099	2822	3241	3052	3455	4184	322487960	ACAATAGAGCATGAGGAAGCCTGTGTCGTGGCCTGAGCTGGCTGCCTGCTCAGTAAGATGCCAGCTCTGCAAGTGTGAGTGAATCTCGCTTTGGCGGCTGCCCAGATGACGTCAGACACTGTACAAGCCTTATCTGCC	mm	chr2:38806145	FALSE	1.13629	1.01403	chr2:38806065	chr9:127563048	11123	+	ENSMUSG00000083776	0.550725	0.0289855	1.37139	1.32352	0.973815	0.996312	1.20639	1.01226	1.34746	1.07516	0.475904	0.267068	0.524096	0.732932	0.820581	0.603625	1	1	FALSE	FALSE	0	1	0	FALSE
mm_Sliding_topH3K27Ac_slide_-100_chr8:97362215	275	1035	873	1732	833	10942	5793	15426	6362	2715	424198666	ACAATGACGGCGCCAGAAGCCGAAGCGAGAGCACGGGAGACCAGAGTGGCCCCTAGGAGGGCCGTTAAGCCCGCTCAGATGCTCGAGCGACCCCGAGCGTCCTCACCTTCCTCGTAGCCTGAAAACCCGCTCCGCGGA	mm	chr8:97362215	FALSE	3.12994	2.87751	chr8:97362115	chr16:57481314	-205	+	ENSMUSG00000031782	0.652174	0.108696	1.00572	1.02729	5.81886	7.76043	0.325425	0.91228	1.0165	6.78965	0	0.582329	1	0.417671	0	0.836459	1	1	TRUE	TRUE	0	0	0	FALSE
mm_Endogenous_chr14:55708255	228	385	150	581	123	313	352	299	538	313	1351100565	ACACAGAGGGGCAAGGTGTTCCTGTACGGGTCTCAATATGGTAACGCCAGCTGCCTCTGACATCATGGAGGAGGGACTCTGTCAGGTTGCCAAGGCAACCAAGCAATTTATGACATCAGAGGCTTGAAGTGTTTGGTT	mm	chr14:55708255	FALSE	1.64968	2.11072	chr14:55708255	chr14:24017704	-2630	-	Zfhx2	0.507246	0.0144928	2.53358	2.33379	1.44381	1.30476	1.82723	1.06156	2.43369	1.8802	0.0200803	0.0160643	0.97992	0.983936	0.157029	0.132569	1	1	FALSE	FALSE	1	2	0	FALSE
mm_Sliding_topH3K27Ac_slide_-20_chr2:181336040	1357	991	1469	1048	289	1094	401	1184	578	443	1520647017	ACACAGCGCTGGCCGGAAACACTTTGCAAACCCACATCTTTGACTTCCGCCCGAAGCTCTAGGTGGGCGGGGCTTTCCGTGACCCAGCTCTCTACTTCCGGTGCGCGGGTGACGTAGTGCCTGCATCTCTTACTGCTG	mm	chr2:181336040	FALSE	1.32783	1.6022	chr2:181336020	chr20:62612464	-23	+	Prpf6	0.594203	0.0724638	2.77559	1.79166	3.56554	3.65048	4.62856	4.42469	4.52662	3.60801	0	0.00200803	1	0.997992	0	0.0626689	1	1	TRUE	TRUE	0	0	0	FALSE
mm_Sliding_topH3K27Ac_slide_80_chr2:165681500	55	134	116	217	77	176	196	208	199	167	1287761572	ACACCATTTGCTGGCCCTTCACCAACTTCCTGCCTCCAATCCACCCCCTCAAAATGAGTCTGACTCTGACTGTGTTAACTTGGGTGAGGGAGCAGGCCTGCTTTGTGGAGGAGATGGCACAGTGACTCAGGAACACAG	mm	chr2:165681500	FALSE	1.72164	1.46329	chr2:165681580	chr20:45944550	-1523	+	ENSMUSG00000085274	0.536232	0	1.40862	1.39239	1.52162	1.70118	0.704102	1.31137	1.4005	1.6114	0.0401606	0.222892	0.959839	0.777108	0.24316	0.55328	1	1	FALSE	FALSE	0	0	1	FALSE
hs_Sliding_topH3K27Ac_slide_-100_chr22:42713242	48	47	101	240	188	1452	897	1261	1300	1475	603059232	ACACCCCAAATCCCCCAAAGAGCACTGGCAACACTATCCGTCTGCCTCCCCTGCAGACTGAGCGCTCTGTGTGCTTGGCCACGTCTGACTCACCCCACCTTCCCCGCCCGCCCTCACTCGGCACACCCTCAACATTTG	hs	chr22:42713242	FALSE	0.892077	1.08229	chr22:42713142	chr15:82771490	NA	-	ENSG00000100207	0.615942	0.0434783	0.202358	0.630732	1.4213	1.16768	0.251679	0.467652	0.416545	1.29449	0.162651	0.957831	0.837349	0.0421687	0.516062	0.979808	1	1	FALSE	FALSE	0	0	1	TRUE
mm_Sliding_topH3K27Ac_slide_-100_chr3:106841905	2422	1076	2292	2001	322	1993	1066	1799	1069	1228	717890935	ACACCCCTTCCAGCGGAAGTTACTAATTCGGACCTGACTGATGCAGTTCCCATAGCAACCCGTGTTTCCTGGGAAACCCGAAAAAGGTTGTCATGGCATCTTTTGCTCTCTAGCCCCACCCCCACCCCAGGCCCTGCC	mm	chr3:106841905	FALSE	1.27339	1.06899	chr3:106841805	chr1:111214692	-716	+	AI504432	0.557971	0.0289855	2.70481	3.07031	2.34326	2.00095	7.4145	6.19609	6.8053	2.1721	0.0100402	0	0.98996	1	0.106382	0	1	1	FALSE	FALSE	2	0	0	FALSE
mm_Sliding_topH3K27Ac_slide_-40_chr7:28231815	394	389	481	818	1322	1324	1045	1292	1524	1494	75046937	ACACCGGGCCACGCGTGTGATGCACAGCCGCGCTCGCGAGCGCTCGAGGCAGCGTCACACACTCCCACACTGCCACTCACACACCGGGCCCCTGGCAACGTCATACACACTCTCTCCACATGCACACTCTCATGGTGT	mm	chr7:28231815	FALSE	1.02605	1.25264	chr7:28231775	chr19:40972852	117	-	ENSMUSG00000011751	0.637681	0.0869565	0.238176	0.305712	1.27952	1.18118	0.293784	0.316718	0.305251	1.23035	0.216867	0.971888	0.783133	0.0281124	0.590878	0.982187	1	1	FALSE	FALSE	0	0	0	TRUE
hs_Sliding_topH3K27Ac_slide_-80_chr14:75726103	1397	1872	1649	2659	927	1459	1602	1426	2191	1785	2039619717	ACACCGGGCCCCAGCAACAGGCTTCTGATTGGCCCGAGGCTTCCAAAGGCGGAGCTTCGTCTCCCGCGCCCGCTCGACTGTGTTGCTGTTTTGGTTGTTGTCTCCCACTTGTTTATTTCTCTAACAGATCCTGGAGGC	hs	chr14:75726103	FALSE	1.31652	1.50729	chr14:75726023	NA	NA	+	ENSG00000258820	0.572464	0.057971	1.63458	1.4172	1.18013	1.09115	1.48553	1.54846	1.52589	1.4119	0.0943775	0.160643	0.905622	0.839357	0.391775	0.480807	1	1	FALSE	FALSE	0	0	0	FALSE
mm_Sliding_topH3K27Ac_slide_40_chr7:28231815	582	379	467	1494	822	1256	1325	1559	1555	1851	1044476969	ACACCGGGCCCCTGGCAACGTCATACACACTCTCTCCACATGCACACTCTCATGGTGTCACTCCTTCGTAAGGGGTCAGTCAGGGTCAAACCTTCTAACTGTCTGTCACACGCAGTCACTTGCAATGTTTTCCTCTCT	mm	chr7:28231815	FALSE	1.05005	1.03161	chr7:28231855	chr19:40972852	277	-	ENSMUSG00000011751	0.521739	0.0289855	0.373205	0.897987	0.979703	1.15038	0.697935	0.494543	0.635596	1.06504	0.497992	0.873494	0.502008	0.126506	0.831533	0.952877	1	1	FALSE	FALSE	0	0	0	TRUE
mm_Sliding_topH3K27Ac_slide_60_chr16:36874970	419	162	224	572	236	595	430	681	453	708	224386315	ACACCTGATCTTTGCCGAAAGCCCACCCCTTTCGGTGTTTTCAGGCCTCCTTGGATCTTCTTCCGGGTCACATCCCACCATGTGATTCCACCCGGCACGTCCTTCTTAGAATCCATTGGCTCCGTCTTTGAGGAAGTG	mm	chr16:36874970	FALSE	0.890917	0.785702	chr16:36875030	chr3:121468898	178	-	Eaf2	0.536232	0.0434783	0.555626	1.1975	1.21337	1.31376	1.75011	0.826219	1.28816	1.26357	0.190763	0.307229	0.809237	0.692771	0.56322	0.634127	1	1	FALSE	FALSE	0	0	0	TRUE
mm_Sliding_topH3K27Ac_slide_-60_chr1:97564240	135	253	263	216	105	102	153	125	141	141	623030931	ACACCTTGTGCATTGGAGGTGGCGGTTTCTTCTGCAGCTGGGCTCGGGGGCGTCACTGGCCCTTTCCTCGCCGTAGCAGGGAAACGATAAGCAAGGCCAGCCAATCACCGTGCTGAGGGGGCGGAGGCTGCTGTTGCC	mm	chr1:97564240	FALSE	1.59175	1.22798	chr1:97564180	chr5:100239047	-51	-	St8sia4	0.630435	0.057971	1.95034	1.01638	1.04446	1.21086	1.26738	2.18035	1.72387	1.40987	0.0943775	0.0903614	0.905622	0.909639	0.391775	0.356155	1	1	FALSE	FALSE	0	0	0	FALSE
mm_Sliding_topH3K27Ac_slide_20_chr10:110827140	21913	125588	28466	154061	15836	37751	76192	37291	89960	45260	1653410733	ACACGCGGAGATGACGCAACTCACTTAATTGCATTACAAGGCTCTGAGTCACCTGGCACCCTGCCAGCTGACAAATTCCAGGCTGGGCTGTTTCAGATCCTCTCTCAGTAGACATTTTTATCCTGGGAGCTGGGACTG	mm	chr10:110827140	FALSE	2.46943	2.44077	chr10:110827160	chr12:76577501	-83067	+	Nap1l1	0.514493	0.0217391	6.41922	4.8066	1.20427	1.12536	1.36402	1.56473	5.61291	2.4551	0.00200803	0	0.997992	1	0.0259157	0	1	1	FALSE	FALSE	0	1	1	FALSE
hs_Endogenous_chr9:91833070	1239	614	760	1211	286	1457	875	1317	1151	939	16403927	ACACGCTGAGAACTACTGTAATTATTTCAATGAGAAATTCCTGCGAACTCCTCCTGTCTCCTTATGTCTGCTTCCTCTCAGCGAGTCACAATGTGTTTCCATGGCAACTCTGTTGCTAAGGGGGGACCCCGTAAGTAC	hs	chr9:91833070	FALSE	1.36692	1.50523	chr9:91833070	chr13:51676150	NA	-	SHC3	0.471014	0.0289855	1.73773	2.09204	2.2403	1.91568	4.2704	2.31317	3.29178	2.07799	0.0140562	0.0060241	0.985944	0.993976	0.130419	0.0847571	1	1	FALSE	FALSE	1	0	0	FALSE
hs_Sliding_topH3K27Ac_slide_-20_chr16:57481936	76	51	43	187	87	277	354	358	344	497	1273984721	ACACGGCCACAGAGAGCCTAGTCCATTGTTTCCCGAAAGCCAGCCGTTTCCTCACCACTTCACGAATTCTGTGATACTCTCTTACCACCTTTGCCACTATGTACTCAGTATTTTTATTTTTAAATAGGAGTTCTTAAA	hs	chr16:57481936	FALSE	1.04484	0.849953	chr16:57481916	chr8:97362830	NA	+	ENSG00000088682	0.42029	0.0289855	0.474494	1.06197	0.804701	0.98385	0.861108	0.430238	0.768233	0.947395	0.730924	0.797189	0.269076	0.202811	0.922522	0.926906	1	1	FALSE	FALSE	0	0	0	TRUE
mm_Sliding_topH3K27Ac_slide_-60_chr11:31269100	195	115	171	238	86	167	184	180	202	179	242203661	ACACGGCCCCCGAGGAATTGCGGGGGTGGGGGCGTAAGGAGACGAGCGGCAGACACGTTTCTTTCTCTCCCGGGAGCTGGGAAGAAGGCCAGCCCCGTGTGCCACACGTCAGGCTTTTGCACTGCAGCTTGCTGGTGA	mm	chr11:31269100	FALSE	1.50788	1.38577	chr11:31269040	chr5:172754380	-123	-	ENSMUSG00000020303	0.637681	0.0724638	1.08238	1.36732	1.34702	1.37348	2.23511	1.73084	1.98298	1.44682	0.0863454	0.0582329	0.913655	0.941767	0.384467	0.31382	1	1	FALSE	FALSE	0	0	0	FALSE
hs_Sliding_topH3K27Ac_slide_-60_chr1:61803965	57	38	33	174	41	242	205	170	244	261	760651080	ACACTGTGGCCAGCCTTAGAGTCTTTGGGTGTGAAAACCACTCTCAGTTACCCGGACTGATTTTTGGTTCCTGTTGCAGTGCTGCAGAATCTATTAAAATCCGGCAGCTGAATTGTCCTGGCTCTGCCACAAAGCTCA	hs	chr1:61803965	FALSE	1.15217	1.148	chr1:61803905	NA	NA	+	ENSG00000162599	0.485507	0.0144928	0.750204	2.0968	1.33871	0.889633	1.37042	0.700631	1.4235	1.15008	0.337349	0.206827	0.662651	0.793173	0.72202	0.526735	1	1	FALSE	FALSE	0	0	0	FALSE
mm_Sliding_topH3K27Ac_slide_-80_chr8:87186760	121	121	133	513	181	201	235	293	294	327	837893306	ACAGAGTCATGATGCGCTGCGCTTCTTTCTGTACTTCCATGCTTGTTCGACGAGAGTAGTTAAGTCGAGAATGGGTTAAGACGGGCGGTGCAGCCCAGACGACAAGCTTACAGCAGCAGGTACTCTGCTAGACGTTCG	mm	chr8:87186760	FALSE	1.0542	1.10406	chr8:87186680	chr19:13263875	-151	-	Ier2	0.521739	0.0724638	0.541111	1.40033	0.887482	1.22383	0.658977	0.639635	0.97072	1.07913	0.463855	0.646586	0.536145	0.353414	0.808958	0.880951	1	1	FALSE	FALSE	0	0	0	TRUE
mm_Sliding_topH3K27Ac_slide_-100_chr15:25378880	155	192	182	385	150	296	233	301	210	267	1770116469	ACAGATCCCAGTAATGATTGAAAGTGTTAATACTTGTAGAATGCCTGATTTAAAGACCACATCACAATGTTAGCACACTCCTTCCAAAAATACTATCTATCTTTTCAAGCATCAAGGAATCTGGGAAGCTTGCCTTTC	mm	chr15:25378880	FALSE	1.28011	0.96583	chr15:25378780	chr5:17183278	34734	+	Gm5468	0.369565	0	1.03607	1.26812	1.60063	1.53978	1.0186	1.05618	1.1521	1.5702	0.0502008	0.441767	0.949799	0.558233	0.280227	0.751902	1	1	FALSE	FALSE	0	0	0	FALSE
mm_Sliding_topH3K27Ac_slide_40_chr12:86796580	94	106	92	91	85	93	86	68	80	160	501457447	ACAGATCTTGGAGGCTGCGGTCTGGATCCCTCGCCAAGAACCAGATCCAGGAGAAAACGTGCTCAACGTGCAGCTCTGCTCCTACTGATTATAGCCCCACAGATGACATCGCTCCATAGTCACACCAAGTCTCCTGTG	mm	chr12:86796580	FALSE	0.788461	0.613992	chr12:86796620	chr14:75726104	-18179	+	ENSMUSG00000021250	0.536232	0.0362319	1.00941	0.528949	0.839217	0.580485	1.09012	0.942167	1.01614	0.709851	0.965863	0.582329	0.0341365	0.417671	0.989773	0.836459	1	1	FALSE	FALSE	0	0	0	TRUE
mm_Sliding_topH3K27Ac_slide_-20_chr8:126813830	310	263	335	772	352	469	331	362	508	509	89470923	ACAGCACCCAGCACTCTCAGCCAGCATGAGCTTCCCCGTGTCTCGTTCCAGGCTGGTCCATATGGATGGGTATTTTTAGATAGTTGTTTTATTGTGTACATAAAATTTGGTCTCCTGCTTAACATAAGCATTTTGCAT	mm	chr8:126813830	FALSE	0.95392	1.22557	chr8:126813810	chr1:230300977	-5212	+	ENSMUSG00000089704	0.434783	0.0144928	0.604773	1.08359	1.33035	0.971389	0.868126	0.82844	0.848283	1.15087	0.337349	0.748996	0.662651	0.251004	0.72202	0.918492	1	1	FALSE	FALSE	0	0	0	TRUE
mm_Endogenous_chr12:31383275	89	23	30	281	96	162	270	240	189	312	1029289582	ACAGCCACATGCTCACATGCCCAAAATACCCACAGCATTACTTGATTAAGGGGGCGTTGCAGAAGCAAAACAATTCCAAACAAAGTCGCTTGACGCAGGAAGTCCCAGTTGGTCCAGCTCCTATTTAGAACCCTGTGA	mm	chr12:31383275	FALSE	1.26944	0.743875	chr12:31383275	chr2:517232	113940	+	ENSMUSG00000043061	0.478261	0.0217391	0.193926	1.44619	0.749673	1.05065	0.913865	0.272025	0.820059	1.00666	0.624498	0.771084	0.375502	0.228916	0.894037	0.921206	1	1	FALSE	FALSE	0	0	0	TRUE
mm_Sliding_topH3K27Ac_slide_-100_chr2:121447480	1482	1836	2391	3558	1749	2184	1985	2186	3167	3033	1490444757	ACAGCCAGTGACTATGAGAAGTCTCGCTCCTTGGGCCTCAGAGCCTCCTGCCTCCATTCCCCTGAACAGAACCATCTGCTACCCACAGGCTCGCCACACAACATCTTTGATGAGTCACAGTTAATGACAAGTTCAATG	mm	chr2:121447480	FALSE	0.960041	1.28224	chr2:121447380	chr15:44251470	35111	-	ENSMUSG00000027238	0.514493	0.0144928	0.849694	1.0051	1.03966	0.984419	0.83526	1.19001	1.01263	1.12114	0.375502	0.586345	0.624498	0.413655	0.744713	0.836975	1	1	FALSE	FALSE	0	0	1	TRUE
mm_Sliding_topH3K27Ac_slide_-80_chr7:104100055	251	156	338	136	62	203	86	210	128	71	2059852394	ACAGCCCTTGCGCCTTAGCCCCGCCCACCTCAGCTCCTGCACCGCCCCTACCGGTGCGGCGCCTCACGAGCTCCCGGACACAATCACGCATGCTCAGACTCCACCCAGCGTGATGACGGAAGAGCGAGCACGGGGTGA	mm	chr7:104100055	FALSE	1.77681	2.21383	chr7:104099975	chr11:78285840	-176	+	ENSMUSG00000018995	0.673913	0.0942029	2.03663	1.08377	4.12809	4.03983	3.99067	4.74552	4.3681	4.08396	0	0.00401606	1	0.995984	0	0.0770232	1	1	TRUE	TRUE	0	0	0	FALSE
hs_Sliding_topH3K27Ac_slide_-40_chr2:97197950	5960	9725	7468	15700	3252	3653	5226	5519	6641	6126	1755975849	ACAGCCGTGCCCCCTTCCTGGCCGTGCTCCTGCCTGGGCCTCTGGAGCCTGCCTCTCCCCCTCTGATGTAAGCTGATATTTTAATTCTCTTACAAGGAATGGTGTTTAGAGAAATGACTTAACCAGATTACTCATCGT	hs	chr2:97197950	FALSE	1.25139	1.33122	chr2:97197910	chr1:36360450	NA	-	ENSG00000235480	0.507246	0.0217391	2.42058	2.38528	0.860962	1.23051	1.80659	1.999	2.40293	1.29131	0.162651	0.0200803	0.837349	0.97992	0.516062	0.161442	1	1	FALSE	FALSE	0	2	1	FALSE
mm_Sliding_topH3K27Ac_slide_-80_chr2:25174750	25	113	27	58	184	454	633	523	613	424	1343465793	ACAGCTGCCTGGACTGTGCGACTGGTCCCGATGCTGCGGCGACTGCAGCAGCTGCGGAGTCGTGAGCGGGACCTACGCGTTCTACCCCTCCCACCGCCCCCGCTTCCTGACGCGGAGTCGAGCGCGCGCCTCCTGACG	mm	chr2:25174750	FALSE	2.18998	1.77536	chr2:25174670	chr9:140033498	-117	-	Grin1	0.702899	0.130435	0.497096	0.15574	1.54597	1.68476	0.133932	0.127734	0.326418	1.98267	0.0160643	0.971888	0.983936	0.0281124	0.137528	0.982187	1	1	FALSE	FALSE	0	0	0	FALSE
mm_Sliding_topH3K27Ac_slide_-80_chr12:86796580	2109	2648	2206	4119	1472	3156	2913	2810	3825	3335	1469666733	ACAGGACCCCGGCAACAGGCTTCTGATTGGTCGGAGGCTAGCAGGGGCGGAGCTTCGGCTCCCGCCCGCTCTGCCCGTGTTGCTGTTTTGGTTGTTGTCTCCCAGCTGTTTATTTCTGTAACAGATCTTGGAGGCTGC	mm	chr12:86796580	FALSE	1.28129	1.40841	chr12:86796500	chr14:75726104	-18419	+	ENSMUSG00000021250	0.586957	0.0507246	1.4561	1.38253	1.36632	1.15083	1.41232	1.30454	1.41931	1.34485	0.130522	0.206827	0.869478	0.793173	0.465782	0.526735	1	1	FALSE	FALSE	0	0	0	FALSE
mm_Sliding_topH3K27Ac_slide_-100_chr17:17511225	2003	1590	2545	3602	2225	2011	1789	2264	2342	2801	34591158	ACAGGGGTGGGGCTGCCGAGAGACAGCGCGTGCGGCTCTGTGGCCACCCTTTCAGTGGTTTTGCTGGCCTCCGGTCTCGCTTACTCATTTCCCTCCCTGACTTTACAGTGCACAGTTGCTGCACTAAAAGTGGGCGTG	mm	chr17:17511225	FALSE	0.936913	1.02675	chr17:17511125	chr5:96519259	-270	+	Riok2	0.594203	0.0507246	0.578425	0.799843	1.0366	1.10399	0.88739	0.995673	0.941532	1.07029	0.48996	0.670683	0.51004	0.329317	0.830633	0.885559	1	1	FALSE	FALSE	0	0	0	TRUE
mm_Sliding_topH3K27Ac_slide_20_chr6:30522920	3631	10031	4626	9345	2165	2642	3169	3213	4533	3780	490568834	ACAGGTCCTTCAGCCCACATCCCTCTCCAGCAGCTCCTCCGGTATTCACTCGCGTCAAAGGGATGACGCACGTGACAGAGTCGAGTGCGGATTCATTTGGGCTGTCACCTAGCAACGCCTAATGGCTCCGCTGGTTCT	mm	chr6:30522920	FALSE	1.22979	1.47261	chr6:30522940	chr7:129937602	-3075	-	ENSMUSG00000086854	0.572464	0.0652174	3.7503	2.13262	1.00914	1.16097	1.65322	1.85997	2.94146	1.3512	0.126506	0.0100402	0.873494	0.98996	0.463991	0.106055	1	1	FALSE	FALSE	0	0	0	FALSE
mm_Sliding_topH3K27Ac_slide_-100_chr10:98786170	31	23	23	53	45	377	384	338	415	484	1983545086	ACAGTAGCTTCAATAAAAGTTGGCTGTGAGGGAGGCTGCATTGGACGCAGGGAGCTGTGTGTCTCTGGGTTTGCTTGCTAATTCTGTCCGCTACTCCCACTACATGAGCCATCTGGAAGGAGGGAGCAGGCTTCAAGT	mm	chr10:98786170	FALSE	1.16382	1.05292	chr10:98786070	chr12:89680406	24449	+	uc007gxl.1	0.521739	0.0144928	0.413709	0.581908	1.12462	0.953836	0.679067	0.444912	0.56199	1.10837	0.39759	0.907631	0.60241	0.0923695	0.753687	0.962587	1	1	FALSE	FALSE	0	0	1	TRUE
hs_Sliding_topH3K27Ac_slide_-20_chr7:130920652	283	1915	360	2092	137	167	343	293	439	299	273778842	ACATACTTATTATCAGCATCCATTTGTTCAGCTACAATTCTATGACGTCCATTGCAGTGAGTGAGTCAGAAGCCACAAGCTAACAGGTCTATTCCTTCCCACCGTCACCTTGGAAACCAATGCATCATCCACAGGAAA	hs	chr7:130920652	FALSE	1.68277	1.80296	chr7:130920632	chr6:31274950	NA	+	ENSG00000233287	0.434783	0.0144928	11.3143	7.54453	0.806411	1.33844	2.03624	2.28739	9.42942	1.74287	0.0281124	0	0.971888	1	0.19858	0	1	1	FALSE	FALSE	1	0	1	FALSE
hs_Sliding_topH3K27Ac_slide_-100_chr16:67694712	792	800	1155	1455	600	552	800	820	583	1222	1430233395	ACATATTTATTATGACTCAGTTTCCTCATCTACACAGTGCACGGTCTTGTAAGGCCAGTGGAAATAAGAGCACACACACAGCGCTAAATAAATGGTACTTCCTTCGCCCTCCCCTCGGATTGGCGGAGCCCTGCTCCC	hs	chr16:67694712	FALSE	0.96033	0.585855	chr16:67694612	chr8:108225420	NA	-	ENSG00000102977	0.492754	0.0362319	1.07924	1.19813	0.652198	0.916527	1.30118	1.67568	1.48843	0.784362	0.933735	0.178715	0.0662651	0.821285	0.988136	0.501658	1	1	FALSE	FALSE	0	0	1	FALSE
hs_Sliding_topH3K27Ac_slide_60_chr22:18121403	172	369	351	451	211	163	185	177	142	235	2125714308	ACATCTGGACGGAGAGACCTCCGGGGCCTCCGTTGGTCGGTCCTTCCGCTCCGGATACCGTTCCGGATGTCAGGTAGTTCAGGTCCCGCCCCGACGCCGGCCGTGACGAAGGCACGCCGGGGTGACCTCACCCTCCAA	hs	chr22:18121403	FALSE	1.1548	0.742016	chr22:18121463	chr6:120786110	NA	+	ENSG00000099968	0.673913	0.115942	1.41554	1.05605	1.00145	1.02875	0.803544	1.44805	1.2358	1.0151	0.608434	0.35743	0.391566	0.64257	0.887321	0.680186	1	1	FALSE	FALSE	0	1	0	TRUE
mm_Sliding_topH3K27Ac_slide_40_chr5:99680685	209	114	160	491	179	197	197	180	283	447	1534622073	ACATGGCGCTGCTGACGAAGGACTCCTTGGAGACGCGTTCACCCAAACATACATACACAAGTATGCGTGCATATTTATCCATATACACCATACGCCCCGAATCCATCTGCAAACGGGCACATTTACATTCACAAGAGA	mm	chr5:99680685	FALSE	0.646488	0.777449	chr5:99680725	chr4:82391786	-1181	-	Rasgef1b	0.471014	0.057971	0.515503	1.35525	0.636312	0.550006	1.15095	0.778083	0.964517	0.711968	0.965863	0.654618	0.0341365	0.345382	0.989773	0.880951	1	1	FALSE	FALSE	0	0	0	TRUE
hs_Sliding_topH3K27Ac_slide_-80_chr5:124242576	378	221	229	855	346	418	586	628	644	776	671387823	ACATGTTCTGAAAAGCTGCACCATTCCCTGGAGAAACTTTATGATTTGGTTACTGCAGCAGGGCGCGCTGCTCCTTGGCTGTGGTAGCCTTGAGTCAGTGCCAAACAATGAAGCAATGCTATTATTAGCCTTTCCATT	hs	chr5:124242576	FALSE	1.10774	1.0191	chr5:124242496	chr18:55293815	NA	+	ENSG00000249423	0.463768	0.0144928	0.517006	1.2209	0.777725	1.10535	1.07691	0.576127	0.868955	1.06342	0.497992	0.732932	0.502008	0.267068	0.831533	0.913817	1	1	FALSE	FALSE	0	0	0	TRUE
mm_Sliding_topH3K27Ac_slide_40_chr10:126857865	695	787	835	1570	613	1061	1163	1167	1644	1653	516686359	ACATTGCAGGAAGCAGGGAATCCCCTATAAATATCCTTCACTGTGTCATTACCCAGCTCTCCCTCCATGCCCGACTGGTGACTGTGCCTCTGTGTCCTGTGTCTTTATGTAACTGTCCCTACTCATCAGATGTGTTAA	mm	chr10:126857865	FALSE	1.03207	1.2213	chr10:126857905	chr12:57735592	23	+	R3hdm2	0.478261	0.00724638	1.03919	1.26541	0.926731	0.964274	1.1176	1.18573	1.1523	1.12668	0.371486	0.441767	0.628514	0.558233	0.740599	0.751902	1	1	FALSE	FALSE	0	1	0	TRUE
hs_Sliding_topH3K27Ac_slide_-20_chr8:71085226	157	204	117	335	61	232	247	206	284	149	1980509789	ACATTTGGTTTTGTTGCCTAGCAACCACTATGCTATGATGTAAGCATGAGTGTGCATCTATGCCTAGGAACAGCTCCATGAGAACATGTTCTCTCTGTTTAAGTGATTACACGTAAACAGGGACAAAAATTTAAATTC	hs	chr8:71085226	FALSE	2.43171	2.34059	chr8:71085206	chr1:13178725	NA	-	ENSG00000140396	0.384058	0.00724638	2.70695	2.71335	2.24809	1.88835	2.53708	1.66961	2.71015	2.38615	0.00401606	0.0120482	0.995984	0.987952	0.0503181	0.106055	1	1	FALSE	FALSE	0	1	0	FALSE
mm_Sliding_topH3K27Ac_slide_-80_chr19:58044435	41	40	54	71	32	170	301	199	265	311	2061419556	ACATTTTTAGAACATTTTCCCTGTAAGCTAAAAGCCATATCTCCCCAGATTTTTTTTTTCAAGTGAAATTGCCTTTCATTTGGCAAAAACTAAACCTGTGATTCATGGAGGCTTTGAGCATGCGCCCTGCTTGCTTTG	mm	chr19:58044435	FALSE	1.41974	1.04635	chr19:58044355	chr10:117532329	-81381	+	Mir5623	0.384058	0.00724638	1.01179	1.09622	0.789223	0.873967	1.26298	1.46894	1.36596	1.23305	0.214859	0.240964	0.785141	0.759036	0.588208	0.570503	1	1	FALSE	FALSE	0	0	0	FALSE
hs_Sliding_topH3K27Ac_slide_40_chr16:53563603	69	45	79	130	120	262	359	326	314	361	518251696	ACCAAATGAGCAAATCATCTGCGTATTATTGCGATTTGATTGACACTGACAAGTGTCGAGCAGACGCGGATGTGAATATGATACAGAAGCTTGCAGCAAAGCTCTTGATAATGTTACTCTTGATAAAGTTGCCTGGCC	hs	chr16:53563603	FALSE	1.45878	1.06811	chr16:53563643	NA	NA	-	ENSG00000166971	0.42029	0.0362319	0.303536	0.535246	1.04787	1.23343	0.566802	0.573066	0.569934	1.26344	0.190763	0.903614	0.809237	0.0963855	0.56322	0.961052	1	1	FALSE	FALSE	0	0	0	TRUE
mm_Sliding_topH3K27Ac_slide_60_chr14:55136340	2521	3445	2506	6456	2496	784	1542	1110	840	1448	2011167532	ACCAAGCCGCTGCTCCCACCAATCCGCAATTCTCACAGTGACGTGGGCGTGGCTCCCCACCAATGACAGACTCTCATTGGTGTCGCTCAGCAATCTCCCAGAATGCCCAGTCCATTTGTAGCACTCTAGTGAGACTAC	mm	chr14:55136340	FALSE	1.56213	0.712367	chr14:55136400	chr14:23398715	98	-	ENSMUSG00000023110	0.550725	0.0362319	1.11718	1.27794	0.781734	1.04702	0.995616	0.873968	1.19756	1.13725	0.35743	0.39759	0.64257	0.60241	0.735808	0.71449	1	1	FALSE	FALSE	0	0	0	TRUE
hs_Sliding_topH3K27Ac_slide_80_chr2:27712733	3037	1968	3783	6814	4099	3237	3262	2659	3724	5969	1557875954	ACCAATCCCGTCGCCGCATGCAAACTCAAGACCAAGCCCCGCCCACAAGCCTTCAGCCAGCCCCAGGTCCTACGTCATAGCGGTCCGTCTCGCTCTTCGATGTACCTGACTTTCTGAGTGCACTCTCTTAATCCTCAC	hs	chr2:27712733	FALSE	0.801649	0.766127	chr2:27712813	chr5:31593600	NA	-	IFT172	0.572464	0.0652174	0.388621	0.821326	0.782983	0.608442	0.730349	0.803374	0.766861	0.783888	0.933735	0.799197	0.0662651	0.200803	0.988136	0.926906	1	1	FALSE	FALSE	0	1	0	TRUE
mm_Sliding_topH3K27Ac_slide_20_chr9:37015760	421	902	543	1330	402	797	973	953	1147	539	248438761	ACCAATGGGAGGACGTAAAGGAGACTGACGTACACACCACCCACCCACCACGCTTTGCGTTGCCTGGAGCCACAGCCAACGTCAGCTATTGAGGACGCCCTTAAGTGCTGAAAGGGCGGCTTTGATTGGTCCATCTTA	mm	chr9:37015760	FALSE	2.64805	2.61317	chr9:37015780	chr11:124981702	-117	+	Tmem218	0.550725	0.0507246	1.81618	1.63462	2.13492	2.41494	1.03233	1.1758	1.7254	2.63061	0.00200803	0.0903614	0.997992	0.909639	0.0259157	0.356155	1	1	FALSE	FALSE	0	0	0	FALSE
mm_Sliding_topH3K27Ac_slide_-20_chr4:125781170	3363	3590	2258	5065	765	1864	1266	1607	1588	1428	1415357334	ACCAATTGGCGATCTTATCTGGGCTTCCTGCCTGAAGGCTTCCGCCCATCCTGAAGATGGCGCACCAACCCCAAACTCAGGCGAGGGGGCGGGAGGCGGGGCCGAGAGCCTATGCGTCACTTCCGTTGTCAGGTGGCG	mm	chr4:125781170	FALSE	1.30049	1.36557	chr4:125781150	chr1:36851556	-70	+	Stk40	0.630435	0.0724638	3.7985	3.27122	1.88464	1.53706	4.3334	2.56934	3.53486	1.71085	0.0341365	0.0060241	0.965863	0.993976	0.221115	0.0847571	1	1	FALSE	FALSE	0	0	1	FALSE
hs_Sliding_topH3K27Ac_slide_-20_chr17:36981653	14272	13074	18139	17768	2938	822	741	863	220	270	501263630	ACCACCGCTCTAGAGGTCACTTCCGGGAGGGCGTCATCTCACCGCGTCGGCGTCGCGGAACGATGACGTACAGGGCTCGGTCGCGCTTTGTGACGTTGGCGTTACTTGCAGATTTTGCAAAGGTCCGGGCTCCGCTGT	hs	chr17:36981653	FALSE	4.02584	1.00058	chr17:36981633	NA	NA	-	ENSG00000108296	0.615942	0.130435	3.60194	2.98798	4.39561	4.36566	4.78847	5.37429	5.08138	4.38063	0	0	1	1	0	0	1	1	TRUE	TRUE	0	0	0	FALSE
mm_Sliding_topH3K27Ac_slide_20_chr3:89802605	1150	714	896	1832	429	1023	453	1088	397	180	1034331213	ACCACGACCAGCTTACGCTACCCTGTCGGATATAGCCAGGGCTCAGCGTTCGCTGCCGGAAAGCAACCCTACGGTGCGGCGTTGTCGTAAAAGTCGTAAGCCGGAGGAAGAGGCGGGGCTGACCGTGCTCCTCAGACA	mm	chr3:89802605	FALSE	3.69171	2.70839	chr3:89802625	chr1:154245098	37	-	ENSMUSG00000027944	0.608696	0.101449	1.34716	2.10989	8.20568	8.25579	2.64243	1.81807	2.23025	8.23073	0	0.0261044	1	0.973896	0	0.183265	1	1	TRUE	TRUE	0	0	0	FALSE
hs_Sliding_topH3K27Ac_slide_40_chr9:104160960	1178	989	1461	1384	404	919	560	934	596	712	2001560743	ACCAGCCAATCGGATACAATCCCAGTGGCAAGAGCTTTCTTTTTCCTGTAGGCTCCCTCGCCCTTTGCACGCTGGGAAATGTAGTCCAGTAGCTGTTGCTGGCGGCGTCTGGACCGCGGCGCTCTTTCCGAGCATGAC	hs	chr9:104160960	FALSE	1.15375	1.02792	chr9:104161000	chr4:49533995	NA	-	MRPL50	0.572464	0.0652174	1.9815	1.69257	1.86357	1.79172	2.87427	3.14795	3.01111	1.82765	0.0220884	0.0100402	0.977912	0.98996	0.162375	0.106055	1	1	FALSE	FALSE	0	0	0	FALSE
mm_Sliding_topH3K27Ac_slide_20_chr18:3281875	78	43	70	109	122	306	285	305	388	489	1042233135	ACCAGCCTATCACTGCCATCAATGTGCAGCTCACTGAAAGCAAAGCCCTGTAAAAACTCTTCCTGTAATAAACCACCCGAATGTTCTTGTTTCTCACTTTTGACATAAAAATCTTTTCATATGAGCTCTGACAAAAAG	mm	chr18:3281875	FALSE	0.854944	0.974352	chr18:3281895	chr10:35483928	148	-	ENSMUSG00000063889	0.391304	0.00724638	0.285291	0.441426	0.903491	0.851909	0.630229	0.499456	0.564842	0.914648	0.785141	0.905622	0.214859	0.0943775	0.935249	0.961052	1	1	FALSE	FALSE	0	0	0	TRUE
mm_Sliding_topH3K27Ac_slide_20_chr19:5041350	873	499	1374	883	152	1465	594	1624	698	427	1696880667	ACCAGTGGTTCCATTGTAAGCGCCACAAATGGGCGCCTCCTGATGACGCACACGGAAGCGTCGACACCTCCTGGAGAAAGAGAATCCTGCGCAGCACTGTTCCGGAGATCAACGGCGGCGGCGTTCACACCCTGGGTC	mm	chr19:5041350	FALSE	2.04061	2.00734	chr19:5041370	chr11:66112599	-2	+	ENSMUSG00000080268	0.601449	0.0869565	2.65728	2.87017	4.9536	5.1947	5.66153	7.86869	6.76511	5.07415	0	0	1	1	0	0	1	1	TRUE	TRUE	0	0	0	FALSE
mm_Sliding_topH3K27Ac_slide_20_chr12:99848755	62	28	34	147	50	125	84	97	122	133	1048570842	ACCATGTGGGTGTTTGAATGTGCTTTAAGACCATGAGTAATTTTCTAAGAATAAAATATCACTGAACTCACAACAGTAAACCTGCCAGCTTCCACACAGCAGCTTCGGCTCATGCTCTAAGATAACTCAATATTTTGG	mm	chr12:99848755	FALSE	0.926466	1.12642	chr12:99848775	chr14:88823354	11553	+	ENSMUSG00000089351	0.391304	0.00724638	0.453281	1.45257	1.35697	0.996145	1.22232	0.591927	0.952928	1.17656	0.293173	0.658635	0.706827	0.341365	0.680962	0.881517	1	1	FALSE	FALSE	0	0	1	TRUE
mm_Sliding_topH3K27Ac_slide_40_chr7:88406725	106	50	54	151	53	319	332	277	260	333	1997169822	ACCATTTCTCAATTCAAATCGGAATATTCTAATTTAAGGCCTAAATCAGTTGTGTCATAATCTCTATGGAAACAAAGCGTTCTACTGTGTGTAGTAGTTGCATAAGTAACTCGTTTCTCTTTGTAGATGACAAATTGT	mm	chr7:88406725	FALSE	1.4625	0.958787	chr7:88406765	chr15:85581072	-33787	+	ENSMUSG00000025584	0.333333	0.0217391	0.763614	1.40764	1.38311	1.13616	1.97149	0.886905	1.42919	1.25963	0.192771	0.202811	0.807229	0.797189	0.56322	0.525472	1	1	FALSE	FALSE	0	0	0	FALSE
mm_Sliding_topH3K27Ac_slide_-60_chr6:141516915	300	459	281	521	168	489	507	481	627	609	51503951	ACCATTTGCGTCAGCGCTAATCCCCTGGGCAAGATCTGGATTTGGCTCTCAATCCATCCGGCTCTTATTGCCAAGCTGATGTTCAATTATCCCAGTACTTGAAATGCACAAAAGTAAAAAGCTTTCTCTGTGTGGGTG	mm	chr6:141516915	FALSE	1.22122	1.26428	chr6:141516855	chr12:20904236	43725	+	ENSMUSG00000030235	0.456522	0.0217391	2.21148	1.53221	1.15932	1.07877	1.76025	1.45598	1.87185	1.24275	0.202811	0.0682731	0.797189	0.931727	0.574939	0.326892	1	1	FALSE	FALSE	0	0	0	FALSE
mm_Sliding_topH3K27Ac_slide_-100_chr11:83116175	692	707	865	1154	463	680	601	622	727	1371	1246482243	ACCCACTTATTGAAGATATCCGGTGGGAAAGCAACTGCGGGTCTCCTGAGTGTATAGGCAACTGCCCTATCCCTGAGACAGGGAAACCTTTCCGTTGCTGAGGCGACAGACACGACCTGGCCGTTTGGTTCTCCCGCG	mm	chr11:83116175	FALSE	0.643041	0.651163	chr11:83116075	chr17:33914281	-223	+	Ap2b1	0.557971	0.057971	1.236	1.23145	0.716115	0.619663	1.47329	1.62628	1.54978	0.667889	0.96988	0.138554	0.0301205	0.861446	0.989773	0.432809	1	1	FALSE	FALSE	0	0	0	FALSE
mm_Sliding_topH3K27Ac_slide_40_chr16:97510545	4582	7890	4997	12952	3421	4325	4275	5500	7275	10525	1208361245	ACCCAGGGTGGAGATGATGACAAAAGACGACGACGTCAGGACTGGATTTAGCACCAGCTGCCAAGGCCTTTGTGAATTTAATTTTGGAGGCATCTCTTTGCCGAGCTGATGCCAAGCTATAGCTGATGAGCACCAGAG	mm	chr16:97510545	FALSE	0.595821	0.848797	chr16:97510585	chr21:42436468	-67709	+	Bace2	0.5	0.0289855	1.86682	1.87057	0.593301	0.713745	1.32028	1.2715	1.8687	0.722309	0.963855	0.0682731	0.0361446	0.931727	0.989773	0.326892	1	1	FALSE	FALSE	0	1	0	FALSE
mm_Sliding_topH3K27Ac_slide_20_chr8:87187935	65	70	51	174	98	103	103	139	133	755	695262057	ACCCCCTGCCAGCGGGCAGACTTCCCGCCACTGCAGCCGGCCGACTTCCCTGGCTAAATTTGGATGTAATGACGTAGGTTGGCGCCGCGAACCACTTCCGGATGCCCATATAAGAACAAGGGCAGCCGGTCTTAGCCC	mm	chr8:87187935	FALSE	0.200121	0.21632	chr8:87187955	chr19:13262764	-1051	+	ENSMUSG00000073822	0.608696	0.0724638	0.578165	0.877232	0.196971	0.251461	0.653809	0.453005	0.727698	0.224216	1	0.815261	0	0.184739	1	0.928905	0	1	FALSE	FALSE	0	0	0	TRUE
hs_Sliding_topH3K27Ac_slide_60_chr22:41844392	18625	27598	27212	48568	22615	44287	54228	50461	58725	52033	802706936	ACCCCGGGGGCACCTCCAGGGACTACTTGCCTTGTGCGTCAGCGAGTGACAGCGTCACACACACGCCCCCTCCCGCACATGCCCGCTGCACCCTCCCTTTCCCCCTCCCCTTCCCTTCTCTCTTTTCCCCTAGCTCTT	hs	chr22:41844392	FALSE	1.52879	1.38592	chr22:41844452	chr15:81690335	NA	-	TOB2	0.644928	0.0507246	0.987781	1.06107	1.22888	1.32458	0.811826	1.04743	1.02443	1.45735	0.0823293	0.566265	0.917671	0.433735	0.376849	0.826525	1	1	FALSE	FALSE	0	0	0	FALSE
mm_Sliding_topH3K27Ac_slide_-60_chr5:76612900	125	145	153	125	61	68	84	113	90	103	2098578714	ACCCGAGAGGACGCAGGGAGAGTCCATCAAGCAGCTCCAGCTACCTGGCCCGGCGCGCCGGGTCCAATAGGACCAGTGAGCGAGCCGCACCTCAACCTGCCGGAAACGTCACGACGCCGGGCTGACGTCGGGCCAATG	mm	chr5:76612900	FALSE	1.19631	1.073	chr5:76612840	chr4:56262062	-124	+	Tmem165	0.673913	0.108696	1.92406	1.01244	0.953198	1.49845	2.01996	2.18334	2.10165	1.22583	0.2249	0.0421687	0.7751	0.957831	0.598048	0.259436	1	1	FALSE	FALSE	0	0	0	FALSE
mm_Sliding_topH3K27Ac_slide_80_chr4:97671150	243	212	213	251	189	190	135	143	258	265	363142361	ACCCGATGGACTTCGGGGTTCCCAAGTTGTTTGTCAATGGAGAGTGGCAGTGAATGGAACGGGCCTGTGCCTCAGCCTGGCATGAGGTGGCACCCTAGCGGCTGTTTTCTGCCTTGGGAACGTGCACTGCTGAGATTC	mm	chr4:97671150	FALSE	0.747291	1.19555	chr4:97671230	chr1:61803966	93587	+	ENSMUSG00000028565	0.572464	0.0362319	0.907933	0.65615	1.03519	0.737043	1.26738	0.981018	1.1242	0.971419	0.688755	0.477912	0.311245	0.522088	0.912228	0.780344	1	1	FALSE	FALSE	0	0	0	TRUE
mm_Sliding_topH3K27Ac_slide_-80_chr6:122824930	30449	36425	44069	64427	30777	27803	33958	32330	30649	45903	1138360892	ACCCGGGCTGCCGGCGGCTCCGTCTACTTTTCTGTTTTGCTGGAACTCTGATTTTGTTTTCTTTTCTTCCTGCCGTCATGCGTCTTTCCACCTCTCCTCCCCATCCCTCCCCCTGAGACATCGTCTGCTCCTCGTCAT	mm	chr6:122824930	FALSE	1.08518	0.819914	chr6:122824850	chr12:8235294	196	+	Necap1	0.550725	0.057971	0.957972	1.03427	0.874504	0.961982	0.975237	1.24642	1.11083	0.952548	0.718876	0.483936	0.281124	0.516064	0.915393	0.780344	1	1	FALSE	FALSE	0	0	0	TRUE
mm_Sliding_topH3K27Ac_slide_-20_chr14:30781530	1388	1738	1666	2519	548	1577	1199	1724	1470	1480	45910235	ACCCTCAAACAATGTTTCTCCTAGACGTCATATCCGGTCTCCTGACTCAGGCAGTATCCACGCCAGCGGAAGTTACTTGTGTGACTGGGCGGAACCTCTAGTCAGGAGTGGTCTCCCAGCAGCCAATGGGCTCGACCC	mm	chr14:30781530	FALSE	1.18839	1.21969	chr14:30781510	chr3:53925992	-75	+	Selk	0.557971	0.0434783	2.56714	2.27111	1.53844	1.59103	2.49673	2.64639	2.57156	1.56474	0.0502008	0.0120482	0.949799	0.987952	0.280227	0.106055	1	1	FALSE	FALSE	0	1	0	FALSE
mm_Sliding_topH3K27Ac_slide_80_chr13:52861205	54	40	25	156	80	532	659	730	704	563	1332856243	ACCCTTTTCTGTAGCCACAGCAAGCACACAACACAAGTATTCGGGTCTGATTAAGTGTTTAATCATCTCTGGCCCACGGCTGGCTGCGGCAGATGGACGGACTCCTAAGAAGTTGGGCCTTCATTCCCACACCGAGTC	mm	chr13:52861205	FALSE	1.71703	1.53553	chr13:52861285	chr9:93862665	8791	-	BB123696	0.521739	0.0362319	0.404715	0.963442	1.36431	1.77099	0.665376	0.272025	0.684079	1.62628	0.0381526	0.84739	0.961847	0.15261	0.235996	0.944601	1	1	FALSE	FALSE	0	0	0	FALSE
mm_Sliding_topH3K27Ac_slide_-40_chr7:104100055	1003	2381	725	1796	700	2178	1391	2222	2057	990	726897553	ACCGCCCCTACCGGTGCGGCGCCTCACGAGCTCCCGGACACAATCACGCATGCTCAGACTCCACCCAGCGTGATGACGGAAGAGCGAGCACGGGGTGACGTAGCTCAGTTGCAACGTGCTTTAAGTCTGGGTCTGCAC	mm	chr7:104100055	FALSE	2.06107	2.55148	chr7:104100015	chr11:78285840	-96	+	ENSMUSG00000018995	0.623188	0.0942029	2.75322	1.26765	3.17639	3.06557	1.41243	0.901569	2.01044	3.12098	0.00200803	0.0542169	0.997992	0.945783	0.0259157	0.305626	1	1	FALSE	FALSE	0	0	0	FALSE
hs_Sliding_topH3K27Ac_slide_20_chr17:36981653	3828	2226	4065	4568	1702	4594	2250	4771	2582	1993	347450126	ACCGCGTCGGCGTCGCGGAACGATGACGTACAGGGCTCGGTCGCGCTTTGTGACGTTGGCGTTACTTGCAGATTTTGCAAAGGTCCGGGCTCCGCTGTCGAGGCCTTTGCTGTCGAGGTCTCATTTTGGCTGCTTCGG	hs	chr17:36981653	FALSE	1.65606	1.5909	chr17:36981673	NA	NA	-	ENSG00000108296	0.601449	0.130435	1.05863	1.32604	3.32809	3.26967	2.21705	2.07903	2.14804	3.29888	0.00200803	0.0421687	0.997992	0.957831	0.0259157	0.259436	1	1	FALSE	FALSE	0	0	0	FALSE
mm_Sliding_topH3K27Ac_slide_60_chr16:98183685	924	1606	1069	2146	629	550	759	667	1114	832	1741093264	ACCGCTCTTCAGCCCTGGGGCAGGCGCCAAGCCCCTTTCCGCTCACACTCGGCTCGCGCAACCCGCAGCCTCCACTGCCGCTGTGATTCCATCCATCTTGAATTTGACGTCATCCCACACCAGGGATGAGGTCATCGC	mm	chr16:98183685	FALSE	1.3382	1.6442	chr16:98183745	chr21:43430367	19	-	Zbtb21	0.623188	0.0724638	2.06669	1.68566	0.954444	1.09498	1.44805	1.4794	1.87617	1.4912	0.0722892	0.0682731	0.927711	0.931727	0.349042	0.326892	1	1	FALSE	FALSE	0	2	0	FALSE
mm_Sliding_topH3K27Ac_slide_60_chr16:91263240	429	514	464	759	322	301	342	301	454	452	1424205548	ACCGGATGGCTGGACCCAGTGCAGGGAAGTGACTTCACGCCACCTTTGTTTCTTCTCATTCCTTTGAGCACACTTGGCCCTGCGTCTCTATGAAAGGGCTTGTTTGAACCATTTGGAACATCCAGCAAGTGAGAGATG	mm	chr16:91263240	FALSE	1.10991	1.23342	chr16:91263300	chr21:34437086	-6653	+	Olig1	0.507246	0.0217391	1.29207	1.1646	0.961478	0.909558	1.3133	1.25436	1.28383	1.17167	0.305221	0.309237	0.694779	0.690763	0.698549	0.634127	1	1	FALSE	FALSE	0	0	0	TRUE
hs_Sliding_topH3K27Ac_slide_40_chr10:111971059	646	885	702	893	346	779	821	861	937	834	1521156791	ACCTAGCTGCGTCGTTCAGCCAATCGGCAGCTCCAGCCTCTTCTGACGTCACGCGTTGCTGGGGCCGGAGGCTGGGTGGGGGGTGGAGCCAGGCTGCAAGCCAGGAAATCTCTGGGAGCTGTAGTGCGGCCAGCTGGT	hs	chr10:111971059	FALSE	1.44404	1.37964	chr10:111971099	NA	NA	+	MXI1	0.652174	0.057971	2.07036	1.27517	1.3486	1.41007	1.84043	1.76612	1.80328	1.41184	0.0943775	0.0742972	0.905622	0.925703	0.391775	0.327844	1	1	FALSE	FALSE	0	1	0	FALSE
mm_Sliding_topH3K27Ac_slide_-80_chr18:62708525	180	385	257	679	177	157	140	172	140	143	1927095561	ACCTCCGCAGCGCTTCCGCTTCCGCCGCCTCTAGCGTCTTCCGAAGAAGTGTCATCGAGGGATGGGCCTGGGCGGGCCTCACCGCGTCCATGTTAGGTGTGGCTCCGTCCTAGCGAAGCGGCCATGATAAGCGTGGTA	mm	chr18:62708525	FALSE	1.43613	1.20222	chr18:62708445	chr5:147763372	-199	+	Spink10	0.637681	0.108696	1.76063	1.89534	1.58517	1.64284	1.00245	1.26392	1.82798	1.614	0.0401606	0.0742972	0.959839	0.925703	0.24316	0.327844	1	1	FALSE	FALSE	0	0	0	FALSE
mm_Sliding_topH3K27Ac_slide_-40_chr5:86602020	663	553	637	603	337	860	447	959	651	507	1375783125	ACCTGACTTCCGGTTGGGGCGGGGCAACGGGGCGCGCTTCCTTGCAGGTGAGGGGAGTGCCTACGTGAAGGCTGCTGAGCGCTGAGGGCAAACGCGGAACCAAAACGCGTCACTTCCGGCTGTGAGAGCGTACCGCTC	mm	chr5:86602020	FALSE	1.29331	1.57676	chr5:86601980	chr4:68567106	112	-	ENSMUSG00000035898	0.652174	0.101449	1.32823	0.884054	2.44907	2.58353	1.93931	1.64539	1.79235	2.5163	0.00200803	0.0763052	0.997992	0.923695	0.0259157	0.334554	1	1	FALSE	FALSE	0	0	0	FALSE
mm_Sliding_topH3K27Ac_slide_60_chr2:165681500	145	59	147	218	64	289	182	281	288	322	1626611839	ACCTTCTCTGGACTAGCAGGACACCATTTGCTGGCCCTTCACCAACTTCCTGCCTCCAATCCACCCCCTCAAAATGAGTCTGACTCTGACTGTGTTAACTTGGGTGAGGGAGCAGGCCTGCTTTGTGGAGGAGATGGC	mm	chr2:165681500	FALSE	0.82912	1.09832	chr2:165681560	chr20:45944550	-1563	+	ENSMUSG00000085274	0.543478	0	0.746194	1.68294	1.29585	1.19194	2.23332	1.99939	2.11635	1.24389	0.200803	0.0421687	0.799197	0.957831	0.572081	0.259436	1	1	FALSE	FALSE	0	0	0	FALSE
mm_Sliding_topH3K27Ac_slide_-80_chr2:28291155	632	732	642	1685	760	1160	1171	1166	1384	1569	1483337680	ACCTTCTGGTTTCCTCTCTGCACCTCACTTGCTCTCCGTGAGTGGGGAAGCGTGCCTGTGGTAACTTCCTCAGGCACATCTGCCATGGGCATATATTCCTGCTGGTTAACATTCTATTTTGGGTTTTCATACGTAAGT	mm	chr2:28291155	FALSE	1.0948	1.08319	chr2:28291075	chr9:138365754	-11324	+	ENSMUSG00000035829	0.485507	0.0217391	0.779609	1.09541	1.06745	1.01503	0.819723	0.735327	0.937511	1.089	0.443775	0.676707	0.556225	0.323293	0.799727	0.885678	1	1	FALSE	FALSE	0	0	0	TRUE
mm_Sliding_topH3K27Ac_slide_60_chr16:21846060	130	151	114	303	117	184	184	194	209	253	1598423244	ACCTTTTCCTTCACAGCACACACAGCCACTAAGTCTGTGCGGAATCCTAAACCAGCCCAATTTACATCCATTCATGAATGTGTGACGTCAGCAAGCTTTGAGCTCCTTTGCGGTGGGCCAGAGGATTGTGTGGGTAGA	mm	chr16:21846060	FALSE	1.06684	1.01442	chr16:21846120	chr3:185080927	331	-	ENSMUSG00000092078	0.492754	0.0217391	1.04465	1.27952	1.05005	1.04733	1.09527	0.848161	1.16209	1.04869	0.52008	0.435743	0.47992	0.564257	0.834316	0.75058	1	1	FALSE	FALSE	0	1	0	TRUE
mm_Sliding_topH3K27Ac_slide_-100_chr1:154615385	116	111	66	244	93	232	258	217	273	351	1500183619	ACCTTTTTGTCAATCCATTTTAAAATATAAAGATATTGTCTCTGGTTCTAACTAGGAGAGACTTCAGATTGGTCGGGTACTACAGATGGAGGAACCAGTGACTCTGTTTCTCCTTTTAGGGAAATGACTGTCTGTTCT	mm	chr1:154615385	FALSE	1.07824	0.955099	chr1:154615285	chr1:183602988	-443	+	ENSMUSG00000008475	0.384058	0.00724638	0.966095	1.29628	0.954316	0.844413	1.22953	0.61776	1.13119	1.01667	0.60241	0.461847	0.39759	0.538153	0.886443	0.763739	1	1	FALSE	FALSE	0	0	0	TRUE
mm_Sliding_topH3K27Ac_slide_40_chr17:34973915	44	46	42	42	178	1065	870	1190	993	1137	1655372309	ACGACGGGCCCTCTGGCTGGTCGTCTGAGTTTGATGACGAAGGCAGCCTCACTTCCGTCGCCCGCACCGCTGCTGATTGGCTCCCGACCAGAGCGCTCACTGGGGCGCGCCGAGGCGCGAGTGGCCCGCCTGGGTTCC	mm	chr17:34973915	FALSE	1.12243	1.07246	chr17:34973955	chr6:31940003	105	-	ENSMUSG00000061207	0.695652	0.115942	0.209179	0.116579	1.35239	1.42952	0.243667	0.205394	0.224531	1.39095	0.104418	0.983936	0.895582	0.0160643	0.416821	0.988543	1	1	FALSE	FALSE	0	0	0	FALSE
mm_Sliding_topH3K27Ac_slide_-100_chr11:118151655	6416	6699	7471	8817	1966	3833	2211	3527	3003	3177	827947709	ACGACGTTTAAAGGAGCCGCACTGCAATGTGCTCCCTGAGTCCGCGTGAAGGGCACGTTCGCCTTAAGAGGCGGAGCTAACGGCGACTTGTCTCCCTGGACCCTCCCTTCTCTGCTATTCGCGACGCACACGTCACCC	mm	chr11:118151655	FALSE	1.02088	1.16073	chr11:118151555	chr17:76837090	-103	-	Usp36	0.601449	0.101449	2.75807	2.21579	1.74194	1.51632	3.21695	3.30792	3.26243	1.62913	0.0381526	0.0060241	0.961847	0.993976	0.235996	0.0847571	1	1	FALSE	FALSE	0	0	0	FALSE
hs_Sliding_topH3K27Ac_slide_100_chr8:81397685	83	49	78	140	54	664	623	705	733	724	1145305650	ACGACTGGAGTTATCTGATTGGCTGCTGGTGATGTAACACCCATGTCAATACTTCCCAGTGAACGCACGTGTTCGACCTTTTATTTAAATTTCCATTTCATCACAGCAATAAGACACTCGGGGCGGTGCATTTTCTGT	hs	chr8:81397685	FALSE	1.26227	1.24325	chr8:81397785	NA	NA	+	ZBTB10	0.442029	0.0434783	0.734483	1.28093	1.32416	1.33	1.51512	1.25736	1.38624	1.32708	0.138554	0.228916	0.861446	0.771084	0.478528	0.560533	1	1	FALSE	FALSE	0	2	0	FALSE
mm_Sliding_topH3K27Ac_slide_60_chr17:85025780	5247	12285	5175	13701	3258	10761	7514	8401	12510	8263	660988422	ACGCAACCTCGGCCGTGACGTCGTTGCCATGGCAACCGAGGAGCCTGCATTCTCTGGCCCAACTAGGTGTTTGCAGCCTGCCTGGGTCAGGGTTGTTCCTCACGCGGAGCCCAGGAACTCTGGGGCGGCGCAGCCACC	mm	chr17:85025780	FALSE	1.33394	1.85914	chr17:85025840	chr2:44001126	65	+	ENSMUSG00000024253	0.652174	0.0724638	3.05213	2.07775	1.8803	1.38866	1.58754	1.38267	2.56494	1.63448	0.0381526	0.0120482	0.961847	0.987952	0.235996	0.106055	1	1	FALSE	FALSE	1	0	0	FALSE
mm_Sliding_topH3K27Ac_slide_40_chr2:29176170	150	127	184	437	135	262	189	318	353	366	1213184168	ACGCAGGCACCAACTTTCAATCTGGGGAGAACGGAGTCAAAGGGATTTTTTTTTAGCGTACGAGTGGACCCAGTGCAAAGTGAATTATCTCCAAGCCATCTGGGAAGTCTGGTGTTTTTCAATGCCTTCACGACTCTA	mm	chr2:29176170	FALSE	0.7575	1.18437	chr2:29176210	chr9:134974822	-26079	+	Med27	0.463768	0.0362319	0.761464	1.59933	1.03355	1.18672	1.09527	1.18643	1.1804	1.11014	0.395582	0.417671	0.604418	0.582329	0.753687	0.734938	1	1	FALSE	FALSE	0	0	0	TRUE
mm_Sliding_topH3K27Ac_slide_80_chr4:136913640	23	53	35	25	151	653	584	682	646	693	1535953995	ACGCATGGTTGGGTGCCCGCGGAAGTGGGAGGGACAAAGAGAGAGAAGGGGCTGAGGGCGGCTCGGGCTCCGCCCCTTGGCGCGCACGCGCGCGGGCTGCGTTCCTTGCATGCTCTGGTTGGCTCTCTGCGCCTTTTA	mm	chr4:136913640	FALSE	1.23618	1.1447	chr4:136913720	chr1:22379146	165	-	ENSMUSG00000006699	0.673913	0.101449	0.284105	0.0818002	1.36048	1.34417	0.150146	0.201767	0.182952	1.35232	0.126506	0.987952	0.873494	0.0120482	0.463991	0.991128	1	1	FALSE	FALSE	0	0	0	FALSE
mm_Sliding_topH3K27Ac_slide_20_chr5:35002830	337	388	426	556	155	135	103	129	122	133	787086694	ACGCCCAGCTTCGTCTCGCGATGAGTGCGTCAGCTTCCCGTATTTCGCGAGAAGTACACAAGTCCTGGATGACACTAAACAGGCACTACAGTTTACTGGATTAAAGACTACAACTCCCAGGAGGCCACACTTCCTCGA	mm	chr5:35002830	FALSE	1.13602	1.12642	chr5:35002850	chr4:2965174	73	-	Nop14	0.514493	0.0652174	2.02619	1.77229	1.46553	1.32477	2.1432	2.39242	2.26781	1.39515	0.100402	0.0240964	0.899598	0.975904	0.404078	0.171624	1	1	FALSE	FALSE	0	0	0	FALSE
mm_Endogenous_chr6:146673340	976	1211	1084	1558	438	803	764	776	933	1137	626995768	ACGCCCAGTAGTGATTAGACTGAGCTCAGGTTCCTGGACCAACCTACACTTCCGCCCGCGAAGGTGGGGGTCGGTACTGGCGCTGACGCCAGAAGGACACTTCCGCCTGGGTGCGTATGACGTCAGGGGCGACCCCTT	mm	chr6:146673340	FALSE	0.985677	1.00766	chr6:146673340	chr12:27397002	-111	+	Stk38l	0.623188	0.0797101	2.23795	1.75746	1.01969	0.932188	2.19654	2.15434	2.17544	0.996669	0.646586	0.0361446	0.353414	0.963855	0.900134	0.239545	1	1	FALSE	FALSE	0	1	0	FALSE
hs_Sliding_topH3K27Ac_slide_20_chr17:38083947	23247	14691	28227	23978	4330	13556	8800	14620	12615	10347	1747601379	ACGCCCGACGCCTTCTGGGAGTTGTAGTTTCTTCCGCTGGCTCCGGGCCGGCCCTCCCGACGCCTCCTGGGAGTTGTAGTTTTTCCTGGGCTCCGTTCCCGGCCTCTTCGGGGACGCACGGTTGGAAGTTGTACCGTG	hs	chr17:38083947	FALSE	1.24758	1.49715	chr17:38083967	chr11:98448655	NA	+	ENSG00000264968	0.644928	0.101449	2.74627	2.736	1.8916	1.9299	5.29228	5.67461	5.48344	1.91075	0.0180723	0	0.981928	1	0.147019	0	1	1	FALSE	FALSE	0	0	0	FALSE
mm_Sliding_topH3K27Ac_slide_80_chr9:64101535	410	248	208	562	177	250	276	277	251	301	1616703724	ACGCGGAAATACGTCACGGGAGGCGCGGCGCATTGGCTTGGGGCGGAGTTAAAGGGAGGCTTTCCGGGCGCCCTCTGCTGACCAGCGGTATCCAGGTGGCTGCTGTACGAGGTTCTTGCACGCAGGTCATCTTGCCTT	mm	chr9:64101535	FALSE	1.34507	1.024	chr9:64101615	chr15:66679136	257	-	ENSMUSG00000004936	0.623188	0.0942029	1.13412	1.56875	1.19918	1.25694	2.28336	1.02294	1.65315	1.22806	0.220884	0.108434	0.779116	0.891566	0.598048	0.395173	1	1	FALSE	FALSE	0	1	0	FALSE
mm_Sliding_topH3K27Ac_slide_-40_chr7:99785675	2064	1488	3083	2936	919	7270	3042	6993	3345	1164	1161618914	ACGCTCTCCTCCGAGTCGTTTTCCAGCGTCTCAGTTCCCGCAGCCTGGAGGGCGTGGCGGCGTGGCCGTCACCTTGGAAACGAGTACACTTCCGGCGTGCGGTCACTTCCGTATCCTTTATGCACGCGTCACTTCCCG	mm	chr7:99785675	FALSE	3.83361	3.52887	chr7:99785635	chr11:82904724	-57	-	Ankrd42	0.623188	0.123188	1.31059	1.57845	9.01764	8.20565	2.2139	2.92023	2.56706	8.61164	0	0.0120482	1	0.987952	0	0.106055	1	1	TRUE	TRUE	1	0	0	FALSE
mm_Sliding_topH3K27Ac_slide_80_chr11:104410935	67	101	127	252	71	184	264	212	245	282	1594609635	ACGGATATTGAAATGGATGGGAAAGCAATTATTATTTCTAATTTCCTAAGCACCTTCTAAACCTGCATGATAAATGCCCCTTGACCCAAACCGCGGTAATGAAAATCCAGACCTGCCCTTTCGCCCACTCCCCTGCTT	mm	chr11:104410935	FALSE	1.37327	1.06687	chr11:104411015	chr17:45265764	-611	-	ENSMUSG00000020687	0.442029	0.0289855	1.15144	1.75361	0.942063	1.02681	0.930208	1.55706	1.45253	1.22007	0.230924	0.190763	0.769076	0.809237	0.606086	0.514446	1	1	FALSE	FALSE	0	0	0	FALSE
mm_Sliding_topH3K27Ac_slide_-60_chr15:44259535	216	64	121	228	78	195	144	195	239	301	702377394	ACGGCGTGGTTCCCATCCCAGACGACTCTGCGGCGCCACGTCTCTTCTGGGAAGTGTAGTGTCCATGAGAAATTTGGTTCTGTTGCAATGCTGGGAAATGTAGTTTTTTGATCCCTGAACCCACGTCAGCTAACAGAC	mm	chr15:44259535	FALSE	0.701775	0.975044	chr15:44259475	chr8:110346450	-222	+	uc007vpu.1	0.514493	0.0507246	0.664148	1.44421	0.935361	0.884852	2.72975	1.35036	2.04005	0.910107	0.789157	0.0502008	0.210843	0.949799	0.936135	0.295102	1	1	FALSE	FALSE	0	0	0	FALSE
mm_Sliding_topH3K27Ac_slide_-80_chr5:71487660	496	541	777	1099	642	652	659	718	1073	1059	718708536	ACGGGCGGCTCCCTGCCGCTCGTCCCCCGACATCATCCCTAGTGGAGCGACGTGGTTGCCTGGAAGAGGTAACGATGTATGGCTCCCACTGGAGGGCGAAGGGGCTAATCACGCCTTTACTTAGTCATCAGCGCATCC	mm	chr5:71487660	FALSE	0.912833	1.24422	chr5:71487580	chr4:46392668	412	-	Gabra2	0.608696	0.0797101	0.68209	0.845773	0.888921	0.926042	0.761571	1.05353	0.907548	1.07853	0.463855	0.694779	0.536145	0.305221	0.808958	0.89299	1	1	FALSE	FALSE	0	1	0	TRUE
mm_Endogenous_chr8:87186760	99	112	233	167	103	211	211	212	235	255	920425533	ACGGGCGGTGCAGCCCAGACGACAAGCTTACAGCAGCAGGTACTCTGCTAGACGTTCGGGCGAGGGCAGCAAGCCGGAGCCTTTTAATATACTGAGAGTGACGTCACTGCAACACCACGCCCAACCAGAGGGCCTCAT	mm	chr8:87186760	FALSE	1.21379	1.13167	chr8:87186760	chr19:13263875	9	-	Ier2	0.586957	0.0652174	0.880157	0.80107	1.19469	1.13553	0.947461	1.96915	1.4583	1.17273	0.301205	0.186747	0.698795	0.813253	0.692126	0.511246	1	1	FALSE	FALSE	0	1	0	FALSE
mm_Endogenous_chr14:45839190	1989	3104	2254	4062	1276	1134	1664	1321	1428	2123	66356857	ACGTAAGAGATCCTCCAACCAATGGACGGTCAGGGGGCGGAGCGAGAACAGCCCCAGGTGACAGAATCTGGAGTCCTCCCGCCGGCGCGAGGAAGTCTTGCAGTTGCTGGGCCAATCAGCAGCGTGGGTGGGAAGAGG	mm	chr14:45839190	FALSE	1.14975	0.825983	chr14:45839190	chr14:53019352	-36	-	uc007tge.1	0.623188	0.0652174	1.96902	1.57282	0.771213	0.849875	1.53655	1.53767	1.77092	0.987869	0.662651	0.0843373	0.337349	0.915663	0.900463	0.352047	1	1	FALSE	FALSE	0	0	0	FALSE
mm_Sliding_topH3K27Ac_slide_40_chr13:53077460	398	712	387	1487	306	178	227	180	248	326	1806227233	ACGTAAGATTATAGCCGGCCTTGGCAAAGGGAGCCATATTCCTGACAGTGACGCACGCGCTTGCCCAAATACGGAATGTGGCAGGTGGCAAGGTCCTTGAGCTCGGACTGTGGGACCTGGGCTCGAATGATTCCCTCA	mm	chr13:53077460	FALSE	1.02143	0.934172	chr13:53077500	chr9:94187338	1098	-	ENSMUSG00000056749	0.557971	0.057971	1.88338	2.40094	0.78834	0.754149	1.28211	1.1009	2.14216	0.977803	0.682731	0.0421687	0.317269	0.957831	0.908104	0.259436	1	1	FALSE	FALSE	0	0	0	FALSE
mm_Sliding_topH3K27Ac_slide_80_chr9:107951560	5688	9829	7443	14456	2330	7536	7486	8133	11807	5910	1409517938	ACGTAGATTGGCTCTCCCTGTTACGTCACTGGCTGCGCCGCCTCCGGCCGGAACTCCGGACCAGCCGGTCTCCAACCAGTTCCTCGTCTTCTGTTCTGGCTGATCCTGGACCCCACATCAGGGTAGAGCAGGGGGGCG	mm	chr9:107951560	FALSE	1.85808	2.45327	chr9:107951640	chr3:49761420	121	+	ENSMUSG00000070284	0.637681	0.0724638	3.41455	3.06537	1.84105	1.8796	2.4064	2.78068	3.23996	2.15567	0.0120482	0.0060241	0.987952	0.993976	0.125719	0.0847571	1	1	FALSE	FALSE	0	1	0	FALSE
mm_Sliding_topH3K27Ac_slide_60_chr7:31207385	1510	1777	1909	3576	1051	1301	989	1629	1575	1606	1216679900	ACGTCAGCGCGCGGCGTCTCGTCTCGAGGGTTTCCGAGTCAGTCCTCGGCTGACTTTAACCCTTCTCGCGCTGGAGTCTGAGCTGGGAAGTCTGGGCTGGGGATTTGCTCTTCTTGGGTCGAGGGAACCGGATTTTCA	mm	chr7:31207385	FALSE	0.903343	1.20428	chr7:31207445	chr19:36390737	81	+	ENSMUSG00000036931	0.594203	0.0942029	1.36856	1.68107	1.16962	1.38541	1.41624	1.58111	1.52482	1.27751	0.174699	0.160643	0.825301	0.839357	0.537402	0.480807	1	1	FALSE	FALSE	0	0	0	FALSE
mm_Sliding_topH3K27Ac_slide_60_chr17:41071565	634	755	750	1094	337	811	525	860	617	493	1774018548	ACGTCATCAGACGCGCGCCCGCAATGTCCGGATTGGATTGGCTAATCCGAGGGCGGTGTTGGCTACGCCCCCTGATTTGATTGGCTGCCGAGCTCCTGCGGCGAGCGGGTGTGACCCCGGCGTCTGGGTTCGGTTCTG	mm	chr17:41071565	FALSE	1.56212	1.53685	chr17:41071625	chr6:49431030	185	-	Cenpq	0.644928	0.115942	1.81341	1.6039	2.37512	2.38262	1.85448	1.93727	1.89588	2.37887	0.00401606	0.0662651	0.995984	0.933735	0.0503181	0.326851	1	1	FALSE	FALSE	0	0	0	FALSE
mm_Sliding_topH3K27Ac_slide_40_chr11:76891965	1258	1930	1996	3662	863	2307	1368	2319	1763	727	242744176	ACGTGACGAGACGCTGACGCCGACGTGTATACGCGCACTTCCGGTTCCGGTACTCGCTTAGCCGCTGAGCCTACCGCTGTGTCTTGCTTAGGATGCGGCTCGGCTCAGAGTCTTAAAGTCAGGGCGGGGAGGCGATGA	mm	chr11:76891965	FALSE	2.76028	2.9779	chr11:76892005	chr17:28443780	106	-	Ccdc55	0.608696	0.123188	1.8102	2.09652	4.58168	4.35681	1.43692	2.0133	1.95336	4.46924	0	0.060241	1	0.939759	0	0.31382	1	1	TRUE	TRUE	0	0	0	FALSE
hs_Sliding_topH3K27Ac_slide_-40_chr16:55948577	282	157	176	445	166	281	216	286	286	368	702057836	ACGTGTCTGGCTGGGGATGCTTGCTAAGGACACCCAGGGTTCTATCTAAGACTCACTGCATCAGAATGTCTAGGGAAGGACATGCCCTTTAAACGAAATCCCTGATAACTTTCTGGACTCTAACGTTTGAGAATTGCT	hs	chr16:55948577	FALSE	0.861009	0.954357	chr16:55948537	NA	NA	-	ENSG00000159398	0.463768	0.0217391	0.765546	1.32447	1.10248	1.0615	1.67457	0.922919	1.29875	1.08199	0.463855	0.291165	0.536145	0.708835	0.808958	0.613609	1	1	FALSE	FALSE	0	0	0	TRUE
mm_Sliding_topH3K27Ac_slide_40_chr17:71948135	1978	2547	1650	1367	4036	4698	4797	5651	6026	5823	1547787969	ACGTGTGACGTAGCCACCGCCGTGCCCTTTGCCCGGTTTTGGGGTAGTGCAGGCTGTGGGCTCCCCCGCGTCGCCGACAGAGTGCGTCACCGCCTTGGCGTCCAGCACATGCGGTGGCCCGAGCTTAGGGCTCGTTGG	mm	chr17:71948135	FALSE	1.20844	1.27079	chr17:71948175	chr2:29093222	114	-	Trmt61b	0.681159	0.108696	0.510808	0.167343	1.16487	1.3255	0.483102	0.35587	0.419486	1.24519	0.200803	0.957831	0.799197	0.0421687	0.572081	0.979808	1	1	FALSE	FALSE	0	0	0	TRUE
mm_Sliding_topH3K27Ac_slide_20_chr2:106561095	30	29	33	78	74	110	119	96	141	150	478011027	ACTAAGACTAAATGCCAGTCACTGTTGGTTGGGACTATAAAGCAATTTGAAGCTCTTCAGGCAGTTGGCTACAGAAAGTAGTTTACATGATTAAAAAAAAATCCAACTTAAGTCAATTGCCACATTTTTAGTGAACAC	mm	chr2:106561095	FALSE	1.16374	1.15431	chr2:106561115	chr11:30581874	-9511	+	ENSMUSG00000016386	0.355072	0	0.317209	0.52078	1.0588	0.874143	0.399625	0.388187	0.418994	1.15902	0.331325	0.957831	0.668675	0.0421687	0.721268	0.979808	1	1	FALSE	FALSE	0	0	0	TRUE
mm_Sliding_topH3K27Ac_slide_-80_chr4:48300480	206	78	161	251	48	452	306	413	314	294	1554149823	ACTACTGATGAATTATTTTTCTTGGATCTTTGTTCACCAGCTGCTCAGTGACTTCATTCACTTTAGCATTTTCTGTTTTCCCATCTCTGTTTCCATGGAGAAGTATGCCAGGATGCGTTTGCCTCCATGGAAACGGAT	mm	chr4:48300480	FALSE	1.52678	1.31152	chr4:48300400	chr9:102871050	7578	+	ENSMUSG00000028344	0.413043	0.0144928	1.31532	2.58359	2.21974	1.91869	4.23048	2.91974	3.57511	2.06922	0.0140562	0.0060241	0.985944	0.993976	0.130419	0.0847571	1	1	FALSE	FALSE	0	1	0	FALSE
mm_Sliding_topH3K27Ac_slide_60_chr9:64101535	356	171	157	397	189	573	544	508	623	515	55713267	ACTAGCCTCAGAGGCAGATGACGCGGAAATACGTCACGGGAGGCGCGGCGCATTGGCTTGGGGCGGAGTTAAAGGGAGGCTTTCCGGGCGCCCTCTGCTGACCAGCGGTATCCAGGTGGCTGCTGTACGAGGTTCTTG	mm	chr9:64101535	FALSE	1.54951	1.4855	chr9:64101595	chr15:66679136	217	-	ENSMUSG00000004936	0.623188	0.0869565	0.732342	1.03781	1.60642	1.34728	1.85674	0.723098	1.28992	1.51751	0.060241	0.307229	0.939759	0.692771	0.310988	0.634127	1	1	FALSE	FALSE	0	1	0	FALSE
mm_Sliding_topH3K27Ac_slide_-60_chr11:74985875	1231	2019	1968	5721	1364	2201	1825	2182	2730	5740	1495288117	ACTATTCTCCCCCAGCCCGTCGCCTGCAGTTCCGGAAAGTTAACCCCTTGGAGGCCAAGCCTGGGGTTACGTACTCCCCTACCCAACCCTGCTTCCGCGTGCGCACCCTCCTCCCGCTCCAACTCCCTGTCGCTTCGT	mm	chr11:74985875	FALSE	0.466394	0.584041	chr11:74985815	chr17:1954630	-221	+	uc007kde.2	0.630435	0.0724638	1.19812	2.07228	0.55363	0.519213	0.889625	1.25594	1.6352	0.536421	0.987952	0.11245	0.0120482	0.88755	0.997247	0.396103	1	1	FALSE	FALSE	0	0	0	FALSE
mm_Sliding_topH3K27Ac_slide_20_chr3:82161790	539	294	313	943	350	489	575	586	627	851	276221291	ACTCACGCATTCCACGTTCTAACTAGCAAAAGGAAGCTTTGCATCGTGGTCACGCAATACCTGCCTATAAACAAGGACTCTGAGCAGGGGCAATCAAGGTTCCTTGTGGCGTGATGGCAGAGGGCCGGTCTTGTTTCC	mm	chr3:82161790	FALSE	0.991152	0.904755	chr3:82161810	chr4:156298267	-135	+	uc008pow.1	0.514493	0.0434783	0.679922	1.33117	0.829642	0.940525	1.51804	0.778458	1.14825	0.947953	0.730924	0.445783	0.269076	0.554217	0.922522	0.75425	1	1	FALSE	FALSE	0	0	0	TRUE
mm_Sliding_topH3K27Ac_slide_20_chr7:28231815	677	554	910	1056	912	932	1090	1020	1358	1461	858044864	ACTCCCACACTGCCACTCACACACCGGGCCCCTGGCAACGTCATACACACTCTCTCCACATGCACACTCTCATGGTGTCACTCCTTCGTAAGGGGTCAGTCAGGGTCAAACCTTCTAACTGTCTGTCACACGCAGTCA	mm	chr7:28231815	FALSE	1.09441	1.14141	chr7:28231835	chr19:40972852	237	-	ENSMUSG00000011751	0.550725	0.0289855	0.491694	0.572085	0.921037	0.953569	0.731741	0.868572	0.800156	1.11791	0.385542	0.777108	0.614458	0.222892	0.752167	0.921206	1	1	FALSE	FALSE	0	0	0	TRUE
mm_Sliding_topH3K27Ac_slide_-20_chr8:35218130	1448	729	1045	3108	1761	3179	2910	3460	4202	4512	1872247167	ACTCCCAGATGGTCCGCTTTTCTTGTTCTGTAGGCCGCATCCTTGAGTCCTGATGACAAGTTTGACTCTCTACCTGCGCATCTTGTCTTGTTATCATGGCTGTTCGATGTCATCATCGCCCACTGTTGTCATGGCTGC	mm	chr8:35218130	FALSE	0.946075	1.14361	chr8:35218110	chr8:29940024	474	+	Saraf	0.5	0.0362319	0.335079	0.871993	1.01726	1.04739	0.810537	0.516554	0.663546	1.04485	0.528112	0.85743	0.471888	0.14257	0.842868	0.949841	1	1	FALSE	FALSE	0	1	0	TRUE
mm_Sliding_topH3K27Ac_slide_-20_chr15:3978085	411	356	335	576	238	261	307	304	371	417	1075391376	ACTCCTTCCCCTGTTGCTCATTTCCTTGCCTTCAATCTCTGAGTGTTGAGAATCTAAAGATGTCATCACAGGACTCCCTCGTGTGCTAGGGAATGGTTCAGAACTGAGTCATTGCGTTGTTAAATTCCTCAAAGGAGG	mm	chr15:3978085	FALSE	1.07995	1.09252	chr15:3978065	chr5:41869269	639	-	BC037032	0.456522	0.0144928	1.21074	1.19574	0.903682	0.995726	1.70227	1.22526	1.46376	1.08624	0.453815	0.184739	0.546185	0.815261	0.804725	0.510224	1	1	FALSE	FALSE	0	2	1	FALSE
mm_Endogenous_chr4:133285965	464	499	461	862	283	437	413	480	487	601	969266801	ACTCGCCACATGGCCCCGCCAGCACAAACTATTGTCTGGCTGCAGAGCTTCTATACAAAGGCACCAGGCCTCCACTTCCTGTGATTCTAGGGACTGGCAGCAGCTGTTGATCAGTTCCCGGAGGGGACCCTCCTCTGT	mm	chr4:133285965	FALSE	1.00804	0.995056	chr4:133285965	chr1:27049870	6171	-	ENSMUSG00000007880	0.572464	0.0217391	1.42723	1.50491	1.04983	1.09086	1.6162	1.41799	1.5171	1.07034	0.48996	0.168675	0.51004	0.831325	0.830633	0.497474	1	1	FALSE	FALSE	0	0	0	FALSE
mm_Sliding_topH3K27Ac_slide_-20_chr3:120994565	578	237	356	1367	434	1218	1025	864	1281	1504	728400735	ACTCGGGTAACAAAACCATTACTGTTCCTTGTAGCGCTTCCTGGGCAAACTGCCCTTAGCCCCACCCATCACGGACAAACCCGGCTCACTGAGACGCAAGAGACGCGTCGTTCTGCGTTTTCCAATCAGAGCCACACT	mm	chr3:120994565	FALSE	0.999719	1.04591	chr3:120994545	chr1:95538682	-209	+	Alg14	0.543478	0.0652174	0.442016	1.55622	1.16926	0.784636	1.31281	0.714035	1.01342	1.02281	0.588353	0.586345	0.411647	0.413655	0.878124	0.836975	1	1	FALSE	FALSE	0	0	0	TRUE
mm_Sliding_topH3K27Ac_slide_20_chr13:34434280	7909	13476	10012	20593	5777	7639	6189	8769	9470	37702	1665034809	ACTCTATCTAGTCTGTTTTCAAGAACTATTTTTGTTCCTGCTTCACACCATGCCTGGCAGGGGATGAGTAGCTGTCTCCTGGTCCCACCGCTAGAGTAATGGTTGGTTTGCTCCACCGGCTAACTTCCAACTTGACTC	mm	chr13:34434280	FALSE	0.240801	0.308445	chr13:34434300	chr6:3454544	-1752	-	ENSMUSG00000038267	0.485507	0.0144928	1.88816	1.7612	0.292539	0.317679	1.34953	1.50861	1.82468	0.305109	0.995984	0.0742972	0.00401606	0.925703	0.998602	0.327844	0.689357	1	FALSE	FALSE	0	0	0	FALSE
hs_Endogenous_chr10:101102134	68	87	68	84	41	186	164	168	291	638	730059133	ACTCTGCTATTTTTACAGTGTTGCTTAGCAAGCCAAACCACCAACTGGCTTAGATTCTGGTGACGAACAACTATTTTTTCATGCCCTAGTGATGTTGGTTACCATGGTGCTCTGGATGACACAGTTGGCTTTTTTATA	hs	chr10:101102134	FALSE	0.377073	0.560099	chr10:101102134	chr19:43526950	NA	+	ENSG00000119946	0.413043	0.00724638	1.71757	1.01225	0.420924	0.359659	1.63489	1.44372	1.53931	0.468586	0.993976	0.150602	0.0060241	0.849398	0.998602	0.46039	0.689357	1	FALSE	FALSE	0	0	0	FALSE
mm_Endogenous_chr1:154615385	1162	1545	1153	2409	682	1385	1567	1437	1535	1799	1446008187	ACTCTGTTTCTCCTTTTAGGGAAATGACTGTCTGTTCTGACAGTCTGATTGGCCTTCCGTTTCCCCTGCTTGCTAACTCACCAGTGCTTTCAGAGACTGAGTAGGTATGGATGGTCCAGCCCAGTTTGAATAACCTGT	mm	chr1:154615385	FALSE	1.27773	1.04778	chr1:154615385	chr1:183602988	-243	+	ENSMUSG00000008475	0.471014	0.00724638	1.83368	1.74519	1.11155	1.09101	1.67952	1.47165	1.78944	1.16276	0.327309	0.0783133	0.672691	0.921687	0.721268	0.337327	1	1	FALSE	FALSE	0	0	0	FALSE
mm_Sliding_topH3K27Ac_slide_20_chr11:83286105	34	37	21	117	60	330	271	325	280	542	2143787957	ACTGAAGTCACATTTTTGTTCTGGTCTCACTTCGATTTTTTTATTGGACAAGGTGGTTATAACAGCCCCGGAGGCGATCAGGTATGGAGCTTGTCACGACTTTCGTTCCGCTCGCTGCCCAGACTCGGGACGCCCCCA	mm	chr11:83286105	FALSE	0.733452	0.634383	chr11:83286125	chr17:34135976	-442	+	ENSMUSG00000020680	0.514493	0.0652174	0.499149	0.963442	0.879075	0.819005	0.558587	0.304668	0.731296	0.84904	0.891566	0.815261	0.108434	0.184739	0.976353	0.928905	1	1	FALSE	FALSE	0	0	0	TRUE
mm_Endogenous_chr18:3281875	163	148	101	456	147	475	635	484	1045	546	1116935477	ACTGACATCACAGTGACGTCACCAGCCTATCACTGCCATCAATGTGCAGCTCACTGAAAGCAAAGCCCTGTAAAAACTCTTCCTGTAATAAACCACCCGAATGTTCTTGTTTCTCACTTTTGACATAAAAATCTTTTC	mm	chr18:3281875	FALSE	1.70602	2.35026	chr18:3281875	chr10:35483928	108	-	ENSMUSG00000063889	0.413043	0.0144928	0.814937	1.53263	1.25607	1.21075	1.09303	0.598085	1.17379	2.02814	0.0140562	0.423695	0.985944	0.576305	0.130419	0.738722	1	1	FALSE	FALSE	0	2	0	FALSE
mm_Sliding_topH3K27Ac_slide_-80_chr4:48057230	245	172	163	547	197	293	412	397	472	504	1340826018	ACTGATTTTGAATATTTCATTTGAGAGGTGGAAGGGGAGGCATCTACAACCCTCAAATGCGAGTTGAGTTCCATGTCTGACCCGGTGCTGGGGAGTAGAGGAACAGTCAGACTCACTCAGCTGTTCAACACGTGTGGT	mm	chr4:48057230	FALSE	1.19914	1.15002	chr4:48057150	chr9:102583356	-954	+	ENSMUSG00000028341	0.485507	0.0217391	0.706711	1.37187	0.83936	1.07588	1.22592	0.720245	1.03929	1.17458	0.297189	0.550201	0.702811	0.449799	0.684272	0.817326	1	1	FALSE	FALSE	0	0	0	TRUE
mm_Sliding_topH3K27Ac_slide_-80_chr11:118151655	930	1143	1179	1206	398	217	398	289	257	405	1781044976	ACTGCAATGTGCTCCCTGAGTCCGCGTGAAGGGCACGTTCGCCTTAAGAGGCGGAGCTAACGGCGACTTGTCTCCCTGGACCCTCCCTTCTCTGCTATTCGCGACGCACACGTCACCCCTCCGCCCCGCAGGCCTGCC	mm	chr11:118151655	FALSE	1.44155	0.779239	chr11:118151575	chr17:76837090	-63	-	Usp36	0.644928	0.0942029	2.32457	1.49712	0.773599	0.974642	2.30337	2.57864	2.441	1.11039	0.395582	0.0160643	0.604418	0.983936	0.753687	0.132569	1	1	FALSE	FALSE	0	0	0	FALSE
mm_Endogenous_chr1:145975235	145	148	131	226	96	206	127	189	197	327	1223944413	ACTGCCAAAATGAGGCATAAAAACTCCTCACACATACTCTCCAATTTTAGATTGAGTTGCTTGGGATGGGCTCTGCTTATGAATCACTTATATGGCAGCGGGTGCTGCCAACTCAAGGCAGACTATATTTACCTTAGC	mm	chr1:145975235	FALSE	0.569715	0.739795	chr1:145975235	chr1:192647440	-49170	-	ENSMUSG00000051079	0.434783	0.00724638	1.24787	1.16313	0.909559	0.789435	1.48888	1.18784	1.33836	0.849497	0.889558	0.273092	0.110442	0.726908	0.976353	0.603625	1	1	FALSE	FALSE	0	0	1	FALSE
mm_Sliding_topH3K27Ac_slide_-100_chr17:46297885	1049	1749	1488	2056	1290	1430	1421	1442	2034	2587	111751238	ACTGCCCCTAGAAGAGAAGCCGCTGGCAGTACGGGAAACTGGGTGCCGACTACAACTCCCCTTAGTCTTTGCGCTCAAGGCGCGCTTGCTGCCCTCGCCCCCGAAGCCACCTGTGACTCTCGCATAGCGATGCCTCTT	mm	chr17:46297885	FALSE	0.805748	0.965489	chr17:46297785	chr6:43597115	-295	+	Gtpbp2	0.608696	0.0724638	1.09744	0.787453	0.798088	0.761327	0.801584	1.00409	0.942445	0.885619	0.837349	0.666667	0.162651	0.333333	0.958967	0.885022	1	1	FALSE	FALSE	0	0	0	TRUE
mm_Sliding_topH3K27Ac_slide_-40_chr11:83116175	9618	12200	9800	14272	3894	10214	6458	10210	9225	5864	155363864	ACTGCCCTATCCCTGAGACAGGGAAACCTTTCCGTTGCTGAGGCGACAGACACGACCTGGCCGTTTGGTTCTCCCGCGCACCCAGATGACGTCAGGCGGCGAGATTCTCTTACGCCAAAGCTTCCGGCTCACCATCTT	mm	chr11:83116175	FALSE	1.6155	1.93181	chr11:83116135	chr17:33914281	-103	+	Ap2b1	0.586957	0.0797101	2.53597	1.81084	2.51486	2.37812	2.43474	2.19073	2.31274	2.44649	0.00200803	0.0220884	0.997992	0.977912	0.0259157	0.164489	1	1	FALSE	FALSE	0	1	0	FALSE
hs_Sliding_topH3K27Ac_slide_60_chr17:73663335	179	186	126	450	130	346	243	427	352	258	177779837	ACTGCCGTTTTGATTGGTTTCCAGTGTGGCGCGGGGGTCTCCTGGGATCCGAAAGAACCTGCCTTTCCGCCCGGAAGTCGGCGTCTTGAGTCATAGGAGTGAGCCACGCCCGGGCTGTGGGAATAAGATGGCGGGGAA	hs	chr17:73663335	FALSE	1.38162	1.67539	chr17:73663395	chr11:115794875	NA	+	ENSG00000161526	0.601449	0.0797101	1.15811	1.71025	1.93628	2.26053	1.35729	0.843697	1.43418	2.0984	0.0140562	0.200803	0.985944	0.799197	0.130419	0.52343	1	1	FALSE	FALSE	0	0	1	FALSE
mm_Sliding_topH3K27Ac_slide_80_chr5:42458975	61	22	30	273	97	221	249	270	400	371	1135168002	ACTGCCTTCATTTGGCTTCCCATAATTGCTTATCATTAGGCCCAGCCGCCCCACGAAGTACCTTTTTATTTATTTAAGTCTCATCTCTGATGGATGGAAAATGAGTCACTTGCATATCTGAGAAACCCAGACTGTTCT	mm	chr5:42458975	FALSE	0.984526	1.32397	chr5:42459055	chr4:13853090	-63	+	ENSMUSG00000067285	0.42029	0.0144928	0.183582	1.39054	0.860062	0.994013	0.6199	0.269221	0.787059	1.15425	0.333333	0.779116	0.666667	0.220884	0.72202	0.921677	1	1	FALSE	FALSE	0	0	1	TRUE
mm_Sliding_topH3K27Ac_slide_-20_chr19:53400280	569	363	401	1033	273	772	678	813	967	834	1231432450	ACTGGAGCCCTGGGAGACAGCAGCCACCTCTCGGGTTTAGCATTACGTCATCCCTTTAGACCCAAATTTATCTCGGCTGCACACAGCCCCGCAGCTCCCGAGCTGCCGCCGCTGACTTTAGAGCTTACGCACAAAGTT	mm	chr19:53400280	FALSE	1.19252	1.42381	chr19:53400260	chr10:111981758	-3662	+	Mxi1	0.565217	0.057971	1.07628	1.86951	1.33648	1.33146	2.05453	1.27862	1.66658	1.33397	0.136546	0.106426	0.863454	0.893574	0.474457	0.395173	1	1	FALSE	FALSE	0	1	0	FALSE
mm_Sliding_topH3K27Ac_slide_40_chr9:121987815	203	193	179	290	156	191	237	238	310	401	499795487	ACTGGCATTTCTGAATGCAGAGACTGTTTGTAGAACAGCATCATTAGTAGATGCTTCATGGAAGTGATTGTTGCCCGTTCAATTATTCCCTAATAGATTAGATAGATGAAGAGACTCCTCTGGAAAGAGAATCAGCCT	mm	chr9:121987815	FALSE	0.866973	0.949315	chr9:121987855	chr3:43280532	-38488	+	Snrk	0.398551	0.00724638	1.00141	0.918469	0.687702	0.810653	1.28273	0.998821	1.14077	0.908144	0.795181	0.455823	0.204819	0.544177	0.939063	0.762593	1	1	FALSE	FALSE	0	0	0	TRUE
mm_Sliding_topH3K27Ac_slide_-100_chr13:77035860	100	66	60	176	89	170	168	196	178	250	1367053799	ACTGTCCAAAGCCAAGCTGAGAGAGGAGAGGGCCTTTGTATATACACTTACATTCTACTTCAATAGTTTCATCATTCCCCAAAACTAACTTAGACCACAAGTCTTCTGTGTTTGCATCTCAGTACCAAAAAAGACCAC	mm	chr13:77035860	FALSE	0.98576	0.874325	chr13:77035760	chr5:94129154	-38763	+	ENSMUSG00000090119	0.405797	0	0.600252	0.977043	0.981794	1.07082	1.10758	0.586841	0.847208	1.02631	0.580321	0.748996	0.419679	0.251004	0.873408	0.918492	1	1	FALSE	FALSE	0	0	0	TRUE
mm_Sliding_topH3K27Ac_slide_-80_chr1:54764910	64	34	31	200	78	156	142	172	114	192	1898814653	ACTGTGTCTGCGTATGTCTGCCTAATGAGTAGTAAAAGAATCAGCACAGATTCAAGTAAGTGGCAAGAAAGCTGTTATTATCCTAAGCAAAGTCAAAGCAGATGGGAGAGACTTGACACGCATATTCAGATACGTGCC	mm	chr1:54764910	FALSE	1.0849	0.729116	chr1:54764830	chr2:197924391	26178	+	uc007azt.1	0.42029	0.0217391	0.352829	1.26685	1.1731	1.22357	0.808814	0.34596	0.809841	1.19834	0.261044	0.777108	0.738956	0.222892	0.648924	0.921206	1	1	FALSE	FALSE	0	0	0	TRUE
hs_Sliding_topH3K27Ac_slide_-40_chr9:122132201	5371	6235	6806	15572	5167	7267	6372	7278	9036	9008	672647381	ACTGTGTGTGTCGCGAGTACCTGAGTGTTTCTGGGGCGGCAGGTGTTTCCACGGCCGCGTGGATCCATCGAGTGTGGGTTTTGTCTCGGGAGTTGCCCGTGTGGGTCCGTTTGTGTCTGCGCGTCTCTCTGTGAGTGT	hs	chr9:122132201	FALSE	1.03765	1.2318	chr9:122132161	chr4:68615885	NA	-	ENSG00000078725	0.594203	0.0869565	0.976737	1.48901	1.16476	1.10353	1.02466	1.1466	1.23287	1.13472	0.359438	0.35743	0.640562	0.64257	0.735808	0.680186	1	1	FALSE	FALSE	0	0	0	TRUE
mm_Endogenous_chr3:120994565	184	180	145	220	150	264	267	278	321	305	1464372974	ACTGTTCCTTGTAGCGCTTCCTGGGCAAACTGCCCTTAGCCCCACCCATCACGGACAAACCCGGCTCACTGAGACGCAAGAGACGCGTCGTTCTGCGTTTTCCAATCAGAGCCACACTTCTGAACTTTGACCGCCCAA	mm	chr3:120994565	FALSE	1.28414	1.2924	chr3:120994565	chr1:95538682	-169	+	Alg14	0.557971	0.0652174	0.971317	0.72464	1.24973	1.24494	1.20918	0.841465	1.02532	1.28827	0.164659	0.566265	0.835341	0.433735	0.517176	0.826525	1	1	FALSE	FALSE	0	0	0	TRUE
mm_Sliding_topH3K27Ac_slide_80_chr15:96378450	371	428	301	431	161	323	344	313	412	520	1329556798	ACTGTTCTTGGCATCCGTCGAAAGCAGTTGCCTGTGTGAAAGTAACTCTTCTTTAAAACACGCAGCGTGCCTGCCTTTCATACAATGGCGTTGTCACGGATTCTCTGGGGCAGCTGAGCCTTGGCCTCCTGGGACAGA	mm	chr15:96378450	FALSE	0.970414	0.972941	chr15:96378530	chr12:46554584	87336	-	Scaf11	0.521739	0.0434783	2.15178	1.32264	0.896831	0.822135	2.27149	1.62742	1.94946	0.971678	0.688755	0.060241	0.311245	0.939759	0.912228	0.31382	1	1	FALSE	FALSE	0	0	0	FALSE
mm_Sliding_topH3K27Ac_slide_-40_chr17:46390855	760	464	388	608	264	736	460	732	640	612	1661624051	ACTTACTTCCCGCGTTGTTCGGCCCTCAGATCCTAGTTCTTTGCCCTAAGACACGCAACGCGAGCCAGCCGCGTGGTCCATGCAGGGACGGGGGGCGGGGCGAGGGCCAGTGACGCAACCGTTGCCATAGGAACTCGC	mm	chr17:46390855	FALSE	1.10258	1.28417	chr17:46390815	chr6:43478156	-338	+	Lrrc73	0.637681	0.101449	1.42264	1.13787	1.73635	1.63366	2.83774	1.27934	2.05854	1.68501	0.0341365	0.0481928	0.965863	0.951807	0.221115	0.28476	1	1	FALSE	FALSE	1	1	0	FALSE
mm_Endogenous_chr6:31274950	146	450	248	729	124	309	230	255	293	212	546442660	ACTTATTCAGCCAGGATGCTGTGACGTCCATTGCAGAGAGTGAGTCAGAAGCCACAAGCTAACAGGTCTATTCCTTTCCTCTGTCACCTAGGAAACCAACTCATCATCCACAGGAAATGCAGGCCCCGATGGGGAATG	mm	chr6:31274950	FALSE	1.59145	1.69717	chr6:31274950	chr7:130920652	2980	+	ENSMUSG00000087380	0.5	0.0144928	2.93745	2.90467	2.10443	1.64288	1.16063	1.74096	2.92106	1.87366	0.0200803	0.0100402	0.97992	0.98996	0.157029	0.106055	1	1	FALSE	FALSE	0	0	1	FALSE
mm_Sliding_topH3K27Ac_slide_-80_chr4:87740525	139	235	58	163	45	34	31	65	23	73	1597289511	ACTTCAACATCTAACTGCAGTGAGCCGCCAAGGCCTTGTCACGCATGCGCGCGAGGGGGCGGGCATCCCAGCAGAGGAGGCGGGACTGGTTCTTGAAGTAGGTTTCGTATTGGCTGTCTCCGACAGGACCCGCCTCCG	mm	chr4:87740525	FALSE	0.622932	0.386899	chr4:87740445	chr9:20684233	-167	+	ENSMUSG00000038368	0.615942	0.0797101	4.22703	1.78964	0.672461	1.21617	3.04485	1.12195	3.00833	0.944314	0.740964	0.0100402	0.259036	0.98996	0.927499	0.106055	1	1	FALSE	FALSE	0	0	0	FALSE
mm_Sliding_topH3K27Ac_slide_-40_chr1:154615385	1593	1924	1943	4625	1468	2230	2169	2346	2633	3331	1079881049	ACTTCAGATTGGTCGGGTACTACAGATGGAGGAACCAGTGACTCTGTTTCTCCTTTTAGGGAAATGACTGTCTGTTCTGACAGTCTGATTGGCCTTCCGTTTCCCCTGCTTGCTAACTCACCAGTGCTTTCAGAGACT	mm	chr1:154615385	FALSE	0.955183	0.970664	chr1:154615345	chr1:183602988	-323	+	ENSMUSG00000008475	0.478261	0.0144928	1.06086	1.5566	0.966588	0.961957	1.06968	1.15214	1.30873	0.964273	0.704819	0.285141	0.295181	0.714859	0.912309	0.611805	1	1	FALSE	FALSE	0	0	0	FALSE
mm_Sliding_topH3K27Ac_slide_40_chr16:36874970	82	44	69	128	83	299	236	246	429	408	2073908850	ACTTCCAACCCATACAGCAAACACCTGATCTTTGCCGAAAGCCCACCCCTTTCGGTGTTTTCAGGCCTCCTTGGATCTTCTTCCGGGTCACATCCCACCATGTGATTCCACCCGGCACGTCCTTCTTAGAATCCATTG	mm	chr16:36874970	FALSE	0.848504	1.29119	chr16:36875010	chr3:121468898	138	-	Eaf2	0.521739	0.0362319	0.429096	0.761944	1.05809	0.823526	0.973866	0.723653	0.848759	1.06985	0.48996	0.748996	0.51004	0.251004	0.830633	0.918492	1	1	FALSE	FALSE	0	0	0	TRUE
hs_Sliding_topH3K27Ac_slide_-40_chr4:39184053	915	876	1266	1579	527	777	866	830	908	1210	1043601013	ACTTCCCAGGGTTAGCGTCTCTGATGTCATGTGATTCCACCCTCCGCCTCTCACCCACCCTCGCAGAGGGCGGTGCGCTTGGCCCGGCCCCTCGAGGCACCGCCTTTCAATTAGCACTCGCTGATTGGTCGCTGCTCG	hs	chr4:39184053	FALSE	1.04987	0.921496	chr4:39184013	NA	NA	+	WDR19	0.630435	0.0797101	1.34547	1.48034	0.927143	0.936904	1.71149	2.09114	1.90131	0.985681	0.664659	0.0662651	0.335341	0.933735	0.900463	0.326851	1	1	FALSE	FALSE	0	1	0	FALSE
mm_Sliding_topH3K27Ac_slide_60_chr9:105545300	521	485	660	906	308	577	569	660	638	667	116300549	ACTTCCGATCTCAACAGGAAGTGAGGTCAACCCGGAGGCTTTCCCGGGAGTTCAGCGTTTGCCGCAGGTGAAGTCGTCTTCCTGGACGGGCACTGTCCCTGTCCCTGTCCCTGTCCAGGGCTGCTGCAAAGGCCCTGG	mm	chr9:105545300	FALSE	1.25138	1.17459	chr9:105545360	chr3:130465700	96	+	Pik3r4	0.615942	0.0507246	1.27459	1.45334	1.249	1.35151	1.66744	1.86532	1.76638	1.30026	0.158635	0.0843373	0.841365	0.915663	0.514738	0.352047	1	1	FALSE	FALSE	0	0	0	FALSE
mm_Sliding_topH3K27Ac_slide_-20_chr11:104410935	90	103	88	291	108	311	262	313	258	274	664944755	ACTTGGCGCTGCATCACACACTTCAAAACCCAATAGGGTTTCTTCAATGACAACAACACCGTGTACGTCAACCCATACTCTGATGTGCTTTCAGGAATGGACGGATATTGAAATGGATGGGAAAGCAATTATTATTTC	mm	chr11:104410935	FALSE	1.40266	1.15628	chr11:104410915	chr17:45265764	-811	-	ENSMUSG00000020687	0.42029	0.0289855	0.771957	1.33125	1.63878	1.56026	0.821452	0.709281	1.0516	1.59952	0.0441767	0.528112	0.955823	0.471888	0.259246	0.796228	1	1	FALSE	FALSE	0	0	0	FALSE
mm_Sliding_topH3K27Ac_slide_20_chr4:132767730	311	359	358	671	323	347	326	358	403	538	1319234185	ACTTGGTTCCTGAAGCTCCCAGACCCCTCACGATTCATGGGCACTGCCAGCCTCAAGCTCCGCCCCCAGGCAAAGCCGGTGCAGCTTCTTGCCAGCCCCCACTCGACATTCCCAGGGTAACACCTGGGAACTCATTTC	mm	chr4:132767730	FALSE	0.888868	0.919847	chr4:132767750	chr1:27719858	-2	-	ENSMUSG00000049649	0.601449	0.0289855	0.899646	1.02639	0.931233	0.908873	0.949121	0.964805	0.963016	0.920053	0.7751	0.654618	0.2249	0.345382	0.931695	0.880951	1	1	FALSE	FALSE	0	0	0	TRUE
mm_Sliding_topH3K27Ac_slide_20_chr17:41071565	789	833	1029	1339	254	441	262	501	305	301	503126468	ACTTGTGTAGAGAAGGCCGGCCTGCGGAGCGTATGTCTTTACGTCATCAGACGCGCGCCCGCAATGTCCGGATTGGATTGGCTAATCCGAGGGCGGTGTTGGCTACGCCCCCTGATTTGATTGGCTGCCGAGCTCCTG	mm	chr17:41071565	FALSE	1.27684	1.2443	chr17:41071585	chr6:49431030	105	-	Cenpq	0.594203	0.0942029	2.65455	2.60458	2.11536	2.27339	3.06201	3.52647	3.29424	2.19437	0.0100402	0.0060241	0.98996	0.993976	0.106382	0.0847571	1	1	FALSE	FALSE	0	1	0	FALSE
hs_Sliding_topH3K27Ac_slide_-20_chr2:28114146	308	923	323	1006	214	510	573	455	677	495	1116408406	ACTTGTTTTTCTCGAATGTTGCCCCTTGGGGGAAATTGCTTCCCCAGTGTAACTTCCCTCGTGCGCTGTATGACGTCGACGTGACGCAGCAGGATGCCACCCCTTTCCGTTCCATGACGTCAGCAGGGCACATGTTTC	hs	chr2:28114146	FALSE	1.69805	1.67949	chr2:28114126	chr5:32000875	NA	-	BRE-AS1	0.543478	0.0652174	3.49114	2.3226	1.48757	1.25548	1.41873	1.31386	2.90687	1.68877	0.0341365	0.0100402	0.965863	0.98996	0.221115	0.106055	1	1	FALSE	FALSE	0	1	0	FALSE
hs_Sliding_topH3K27Ac_slide_60_chr13:109115896	587	494	612	1783	386	792	602	706	787	1048	501810543	ACTTTCTCCATTACCATAGTAACCTCTTACATGTTGGCGGAAGCTGATGTCATTCTAGGTATTATTCATTCTTAGTGGATTGATACTCAGTGTGCTAATAAGTCTCAATGATAAAAAGAACTAAGTATACATACCGGT	hs	chr13:109115896	FALSE	0.84263	0.92216	chr13:109115956	chr8:10131055	NA	+	ENSG00000232087	0.355072	0.0144928	1.0359	2.28221	1.09113	0.920123	1.49904	1.38014	1.65906	1.00562	0.626506	0.108434	0.373494	0.891566	0.895418	0.395173	1	1	FALSE	FALSE	1	1	0	FALSE
mm_Endogenous_chr2:181336040	3589	2286	4405	3048	566	3179	1463	3000	1551	981	95571750	ACTTTGCAAACCCACATCTTTGACTTCCGCCCGAAGCTCTAGGTGGGCGGGGCTTTCCGTGACCCAGCTCTCTACTTCCGGTGCGCGGGTGACGTAGTGCCTGCATCTCTTACTGCTGCGACACCCGGAGGACTCTGA	mm	chr2:181336040	FALSE	2.18765	1.94149	chr2:181336040	chr20:62612464	17	+	Prpf6	0.594203	0.0724638	3.26918	2.66066	4.67878	4.17691	6.25058	6.77468	6.51263	4.42784	0	0	1	1	0	0	1	1	TRUE	TRUE	0	0	0	FALSE
hs_Sliding_topH3K27Ac_slide_-60_chr1:232278449	163	54	70	247	105	302	420	396	461	627	523509706	ACTTTGTGAGCTCCAAGCATGAAAAGTGGCATTTATAACTCCCCCTGGAATTTCCATGTACCCAGGACACTGCCAGGCCAAAGGATGAATCACAGCTTCTTAGAATTGTGGAAGCCATTTTGGAAACAGCTGCCAAGT	hs	chr1:232278449	FALSE	0.982615	0.902872	chr1:232278389	NA	NA	+	ENSG00000235152	0.456522	0	0.416279	1.16225	0.695426	0.862641	1.53025	0.58032	1.05528	0.942744	0.742972	0.528112	0.257028	0.471888	0.927499	0.796228	1	1	FALSE	FALSE	0	0	1	TRUE
hs_Sliding_topH3K27Ac_slide_20_chr1:61707930	744	399	501	1364	569	1082	1277	1369	1371	1752	1577415968	ACTTTTCAGACACTTGGCATGAGCTCAATAGGGATCTCCAGGCTACACAGGAGACAGTGTGTGTGCTTGGATGCTTTTAAAATTCTTGGATAGGTGGAGCATACTACTTCTGCTGGCATGTTGGTTCATTGTGCTGGC	hs	chr1:61707930	FALSE	1.0692	0.96094	chr1:61707950	chr4:97591305	NA	-	ENSG00000237853	0.463768	0	0.567597	1.18439	0.891671	1.06726	1.28891	0.766451	1.02768	1.01507	0.608434	0.560241	0.391566	0.439759	0.887321	0.820174	1	1	FALSE	FALSE	0	0	0	TRUE
mm_Sliding_topH3K27Ac_slide_40_chr2:165681500	111	61	69	224	107	417	444	334	639	494	1058889656	ACTTTTTTTTTTCCTCTTCCACCTTCTCTGGACTAGCAGGACACCATTTGCTGGCCCTTCACCAACTTCCTGCCTCCAATCCACCCCCTCAAAATGAGTCTGACTCTGACTGTGTTAACTTGGGTGAGGGAGCAGGCC	mm	chr2:165681500	FALSE	1.31843	1.58843	chr2:165681540	chr20:45944550	-1603	+	ENSMUSG00000085274	0.507246	0	0.461451	1.03432	1.21877	0.923468	1.02259	0.561338	0.791965	1.45343	0.0843373	0.777108	0.915663	0.222892	0.378471	0.921206	1	1	FALSE	FALSE	0	0	0	FALSE
hs_Sliding_topH3K27Ac_slide_-40_chr8:110346450	1187	763	1424	1170	225	413	344	458	376	487	449983322	AGAAAACACTGCGGTGCGAACTGCCTTCTGGGAAATGTAGTGTCCGTGAAAAAGTTGAGACTGTTGCATGCTGGGCTATGTAGTTCTCCTGGTACTTAACGCGCGCGCGACGGCAAGGTCTGAACTCTGTTACCCAGA	hs	chr8:110346450	FALSE	1.03617	0.948095	chr8:110346410	chr15:44259535	NA	-	NUDCD1	0.514493	0.0652174	2.74487	2.56918	1.22443	1.28451	5.20034	5.50918	5.35476	1.25447	0.196787	0	0.803213	1	0.565331	0	1	1	FALSE	FALSE	0	0	0	FALSE
mm_Sliding_topH3K27Ac_slide_-80_chr19:4794055	988	772	456	1254	427	218	426	344	234	662	1581370044	AGAAAGAGGGGTGAACCTACCCACCGGATTGGCCGTTCGGTAAAGTAAAAGGCTGGCGTTCCCGGAGATCCTCTTCCTGATTGGTTACCCGGAACGCCAATTACCTGAGAGGCCAGGAAGAGGTGGAAACGTCAGTAA	mm	chr19:4794055	FALSE	0.94396	0.434061	chr19:4793975	chr11:66406037	-114	-	Rbm4	0.536232	0.057971	1.46342	1.45098	0.475455	0.709746	2.28083	0.9296	1.60521	0.68901	0.96988	0.12249	0.0301205	0.87751	0.989773	0.415933	1	1	FALSE	FALSE	0	0	0	FALSE
mm_Sliding_topH3K27Ac_slide_-20_chr3:145771170	633	971	831	1304	412	318	491	439	458	737	114059914	AGAACGCCTTCACCAATACCTTATCCGCTCCCCAACATTGTCTCTCATAGAAGGCTAGTGATTGGTTGTTGTGTTGTGACGTCACCTAACGTAATCCCAGAGAAGCCCAGTTTCCCACTAGCAAGGAAAGCACTAGTT	mm	chr3:145771170	FALSE	0.977273	0.763116	chr3:145771150	chr1:85527880	36	-	ENSMUSG00000043020	0.471014	0.0289855	1.90766	1.56377	0.622975	0.813578	1.5145	1.75575	1.73571	0.870195	0.859438	0.0903614	0.140562	0.909639	0.965821	0.356155	1	1	FALSE	FALSE	0	2	0	FALSE
mm_Sliding_topH3K27Ac_slide_-80_chr10:34001950	45	36	45	75	28	35	43	34	76	43	464499523	AGAAGCCAGGTCCAGAAGCCCCGCCACTGTCTTCAGTCTCCTAGGATGATTGACATCCCTTTACGGAAACAAACGTGACAACCGCTATCCGCTACATTTACAGAAGCCAAACAAATACGGAAGTCACGAGCTGAAGAA	mm	chr10:34001950	FALSE	1.4669	2.17039	chr10:34001870	chr6:116601130	-205	+	Tspyl1	0.485507	0.0507246	1.0407	1.32341	1.1752	1.07997	1.58423	1.39899	1.49161	1.81865	0.0220884	0.176707	0.977912	0.823293	0.162375	0.501658	1	1	FALSE	FALSE	0	0	0	FALSE
mm_Sliding_topH3K27Ac_slide_80_chr3:145771170	467	565	329	1049	411	524	364	466	557	690	1899072017	AGAAGCCCAGTTTCCCACTAGCAAGGAAAGCACTAGTTCTCTGTTCGATTTAGGTCTCTGTTCTTTGCAGTGGCCCCTCTTGACTTAGGTCCATGCCTTGCCTTGCGTCCACTTCAGCCTTAGTCAAAGGGAAGTTCT	mm	chr3:145771170	FALSE	0.773845	0.991286	chr3:145771250	chr1:85527880	236	-	ENSMUSG00000043020	0.492754	0.0144928	1.11272	1.26103	1.09646	0.922442	1.12005	0.696808	1.18687	1.00945	0.616466	0.403614	0.383534	0.596386	0.889213	0.718677	1	1	FALSE	FALSE	0	0	0	TRUE
mm_Sliding_topH3K27Ac_slide_80_chr16:97296955	77	35	35	152	108	175	168	231	141	261	751806911	AGAATCCACACTGCTCCAGAGCCTATGTCACCAATGTCTCATCTGTATACAAGGGGTGCTTAAAGAATCTTATTGAAAATGCCATGCATACAACTAGCTTAGGTGTTGTGTGGTTCCTCTTCACTGACAAGTCGACAA	mm	chr16:97296955	FALSE	0.944214	0.663394	chr16:97297035	chr21:42102649	-95227	-	Dscam	0.427536	0.00724638	0.262315	0.695362	0.968075	1.20885	0.702798	0.2821	0.492449	1.08846	0.447791	0.935743	0.552209	0.064257	0.80275	0.972624	1	1	FALSE	FALSE	0	0	1	TRUE
mm_Sliding_topH3K27Ac_slide_-20_chr18:53904745	123	62	93	151	75	70	85	68	101	113	1703547030	AGAATGGCCAGAGTGTGAACTGTTCTTACTCAGCACTTCCCTGTTTGTCCTATGAAAACAAGTAGCGTCAATACGGTAGTTACTGTAACCGCTGGCGCTGACGTAATCTCTCCCAGATTAAGCTGTACCTTAGAAACA	mm	chr18:53904745	FALSE	1.10342	1.09758	chr18:53904725	chr5:122759555	498	-	ENSMUSG00000048799	0.449275	0.0362319	0.669129	0.994734	0.894398	0.821926	1.61662	1.0794	1.34801	1.1005	0.413655	0.267068	0.586345	0.732932	0.773041	0.603625	1	1	FALSE	FALSE	0	1	0	FALSE
mm_Sliding_topH3K27Ac_slide_-80_chr9:29024360	208	440	214	757	103	215	481	199	503	319	2113684725	AGACACTAGTTTCTTTCACTTGTCTATCAATGCTGTATAATAGATCAGGCGAATGACGCACGATTGCTTCATCTATGGCCTGTTTAACATGCATTAAGCGGCATAGCTGTGTCTCAGCCTGCGTCAGTCACCAACAAG	mm	chr9:29024360	FALSE	2.21185	1.93629	chr9:29024280	chr11:131982088	30950	-	ENSMUSG00000059974	0.442029	0.0362319	3.45776	3.6312	0.973104	0.852049	1.99063	1.80857	3.54448	2.07407	0.0140562	0.0060241	0.985944	0.993976	0.130419	0.0847571	1	1	FALSE	FALSE	0	0	0	FALSE
hs_Sliding_topH3K27Ac_slide_-100_chr9:104160960	69	190	110	198	88	115	151	153	118	162	775997991	AGACCAAAATTCTCTACATGGTGTCCCTGAGACTGTCCACATGAAGACTCTTCTGGTAATGCCCGACACAGATCGCGCCGCCATCTTCGATGAGATCCACGGGCCTGAGCGCAGCCTTCAGCCAGCAGTGACGCGCCC	hs	chr9:104160960	FALSE	1.3673	0.894458	chr9:104160860	chr4:49533995	NA	-	MRPL50	0.572464	0.0652174	1.74763	1.11166	1.02493	1.28997	0.772912	1.0881	1.42965	1.15745	0.331325	0.202811	0.668675	0.797189	0.721268	0.525472	1	1	FALSE	FALSE	0	0	0	FALSE
mm_Endogenous_chr10:110827140	3075	15681	3541	20519	2024	3510	6189	3650	8160	4340	758965193	AGACCACATGTTCCCACAGCACACGCGGAGATGACGCAACTCACTTAATTGCATTACAAGGCTCTGAGTCACCTGGCACCCTGCCAGCTGACAAATTCCAGGCTGGGCTGTTTCAGATCCTCTCTCAGTAGACATTTT	mm	chr10:110827140	FALSE	2.09186	2.30884	chr10:110827140	chr12:76577501	-83107	+	Nap1l1	0.507246	0.0217391	6.27109	5.00884	1.16769	1.1487	1.49761	1.52291	5.63996	2.20035	0.0100402	0	0.98996	1	0.106382	0	1	1	FALSE	FALSE	0	1	1	FALSE
mm_Sliding_topH3K27Ac_slide_20_chr12:112127360	1322	393	1085	1008	543	3296	1141	3355	1550	1251	1065788025	AGACCCAAAAACCCGCCTGCGAACTGAGGAAGTGACGTCACTTCCGTCCTTGGGCCCGCCCACACTTGTGGCTCTGCCGCTCTAGCCCTCCGCGGAGTCACTGCTACTCTCTGAGGCCTAACCCGTTGCCTAGGCAAC	mm	chr12:112127360	FALSE	1.33792	1.52148	chr12:112127380	chr14:102829271	45	-	Cinp	0.615942	0.0652174	0.585831	0.917174	3.80401	3.66301	2.39991	1.73936	2.06963	3.73351	0	0.0461847	1	0.953815	0	0.278162	1	1	TRUE	TRUE	0	1	0	FALSE
mm_Sliding_topH3K27Ac_slide_40_chr4:132767730	4824	8281	4316	9270	5800	3874	4290	4158	6397	7701	1479746564	AGACCCCTCACGATTCATGGGCACTGCCAGCCTCAAGCTCCGCCCCCAGGCAAAGCCGGTGCAGCTTCTTGCCAGCCCCCACTCGACATTCCCAGGGTAACACCTGGGAACTCATTTCCCCTACACTCTCCCAGACTT	mm	chr4:132767730	FALSE	0.817169	1.02005	chr4:132767770	chr1:27719858	38	-	ENSMUSG00000049649	0.601449	0.0289855	1.15567	0.789665	0.726313	0.737462	0.819866	0.647758	0.972668	0.91861	0.779116	0.646586	0.220884	0.353414	0.933906	0.880951	1	1	FALSE	FALSE	0	0	0	TRUE
hs_Sliding_topH3K27Ac_slide_-80_chr3:129158957	74	118	199	151	158	495	219	514	307	269	1653586356	AGACGCCGCCGCTGCTTTCCGGCCGCCCCCTCGGCTACAGCCGCCATTTCCACGCTCCACCAATCAAATCCATTCTCGAGGAAGACGCACCGCCCCCACACGCCCCGACCAATCGCTCGCGCTCTGGTTGCGCTGGCG	hs	chr3:129158957	FALSE	1.19425	1.40145	chr3:129158877	chr6:115803490	NA	+	ENSG00000163913	0.673913	0.130435	0.604511	0.472184	2.65683	2.60984	0.461677	1.09636	0.779021	2.63333	0.00200803	0.789157	0.997992	0.210843	0.0259157	0.925265	1	1	FALSE	FALSE	0	0	0	FALSE
mm_Sliding_topH3K27Ac_slide_80_chr3:120994565	434	864	988	1866	541	655	672	799	769	1330	1431872132	AGACGCGTCGTTCTGCGTTTTCCAATCAGAGCCACACTTCTGAACTTTGACCGCCCAACTTGGCAAGCTCCGCCCAGTGCAGACCATCCCCGCCCACAGAGAGGCGCTTTGCTCCCTGTTTGCTCTTAAGCGCGGTGC	mm	chr3:120994565	FALSE	0.741173	0.710015	chr3:120994645	chr1:95538682	-9	+	Alg14	0.586957	0.0724638	1.2927	1.70414	0.711051	0.820536	0.790781	1.58971	1.49842	0.765794	0.943775	0.176707	0.0562249	0.823293	0.989773	0.501658	1	1	FALSE	FALSE	0	0	0	FALSE
mm_Sliding_topH3K27Ac_slide_-60_chr11:97627965	4334	4225	5305	5797	1613	6052	3883	6286	4428	2559	1648496754	AGACGGCCTCTCGGGACCTAATCCCTACAGGAACCAGCTGCCCTTTTCCCCGCCCGCTCTAGCTCGCACTTCCGGGGTGGTGTCATATGACTGCGTCAGCGTCTCGGCTCGATGACGTTTGGTATGAGCGCTAAGTCT	mm	chr11:97627965	FALSE	2.22587	2.12486	chr11:97627905	chr17:36981654	-82	-	Cwc25	0.594203	0.0869565	2.12018	1.77566	3.4146	3.35511	2.64861	2.86293	2.75577	3.38485	0	0.0120482	1	0.987952	0	0.106055	1	1	TRUE	TRUE	0	0	0	FALSE
hs_Sliding_topH3K27Ac_slide_-20_chr13:103498394	2335	3574	3023	4728	1794	1750	1642	1922	2438	2625	1185372679	AGACGTTTGGGCCTAAGCGCTGGGCGAGGCGAGGCCCTGCCCCTCCCCGCCAACGGCCATTCTCTGGACCTGTCTTTCTTCCGGGAGGCGGTGACAGCTGCTGAGACGTGTTGCAGCCAGAGTCTCTCCGCTTTAATG	hs	chr13:103498394	FALSE	0.917584	1.14051	chr13:103498374	chr1:44204735	NA	+	ENSG00000134899	0.630435	0.0724638	1.61254	1.30211	0.962543	1.00006	1.283	1.46681	1.45732	1.02904	0.566265	0.190763	0.433735	0.809237	0.860172	0.514446	1	1	FALSE	FALSE	0	0	0	FALSE
mm_Sliding_topH3K27Ac_slide_60_chr6:134836725	242	150	167	609	206	276	420	453	445	417	221876554	AGACTACTGACATCATTTGAGATAACACAGCAGCCAAGCAATACAGTTCATGACTAAGAACAAGGACTTTACGGTTCAGAGTCTTGGGATTCAATTCTTGTTCTATTACGTGCTCCCTAAGTTACCCTAGCATAGGGC	mm	chr6:134836725	FALSE	1.47746	1.31044	chr6:134836785	chr12:12836316	-958	-	Gpr19	0.42029	0.0144928	0.589391	1.46063	0.955618	1.48376	1.15801	0.705681	1.02501	1.39395	0.10241	0.566265	0.89759	0.433735	0.409758	0.826525	1	1	FALSE	FALSE	0	1	0	FALSE
mm_Sliding_topH3K27Ac_slide_-60_chr6:70822380	1208	1577	1673	2639	437	523	790	604	1037	771	771917310	AGACTCAAAGCTGACTATCGGAGTGACTCATTCCTTTGCTTAGAGGATGAGGTAATGCTATTGTGAGGGGTGATGTCATCGCTACCTGAACTGCATGCATATAGATCACTGCTCAGGCTCTCCAGGAAAAGCACCATC	mm	chr6:70822380	FALSE	1.50305	1.65165	chr6:70822320	chr2:88899762	-6294	+	ENSMUSG00000031668	0.471014	0.0144928	2.92099	2.98366	0.979397	1.07	2.72489	3.33253	3.02871	1.57735	0.0481928	0.0100402	0.951807	0.98996	0.275284	0.106055	1	1	FALSE	FALSE	0	2	1	FALSE
mm_Endogenous_chr6:115803490	5088	6138	6211	9069	3762	24700	6570	25332	8360	7161	1655637578	AGACTCCCCGCCCCACCCACCTTTCCGGACCAATCGCTCGTGTCATACTTACGCTTCCGCCTCCTGCGTCCCTACGCGCCCGGCGCTTCGGCGGAGGAGGTGGGCTCCCTTTTGTACATGCGCACTTGGAGCTTTGGG	mm	chr6:115803490	FALSE	1.34584	1.43359	chr6:115803490	chr3:129158957	3	+	ENSMUSG00000030323	0.644928	0.101449	1.32065	1.19105	4.98006	4.83168	1.33319	1.43715	1.38517	4.90587	0	0.228916	1	0.771084	0	0.560533	1	1	TRUE	TRUE	0	0	0	FALSE
mm_Sliding_topH3K27Ac_slide_-100_chr18:62708525	1510	1949	2267	4270	908	1332	1014	1353	1506	1344	955633159	AGACTCTTCCTGCGGCCCCCACCTCCGCAGCGCTTCCGCTTCCGCCGCCTCTAGCGTCTTCCGAAGAAGTGTCATCGAGGGATGGGCCTGGGCGGGCCTCACCGCGTCCATGTTAGGTGTGGCTCCGTCCTAGCGAAG	mm	chr18:62708525	FALSE	1.10673	1.376	chr18:62708425	chr5:147763372	-239	+	Spink10	0.65942	0.101449	1.73742	2.32345	1.43092	1.37499	1.63929	2.17333	2.03044	1.40296	0.0983936	0.0542169	0.901606	0.945783	0.396927	0.305626	1	1	FALSE	FALSE	0	0	0	FALSE
mm_Sliding_topH3K27Ac_slide_-100_chr5:81452050	727	869	737	1569	591	1381	1078	1189	1275	1859	1974012941	AGAGAACATTGTAAACAACAGTGTAAGCATCTTTGCCACTGTCTCCCTCAGAGCCGAACCTGCTGGTGGCTGTTGTGCTTACTTTCCTGGGTGGCTTACTCATTAGGAAGTGTAAGGCTGCTTGCACCTCTGATTTTA	mm	chr5:81452050	FALSE	0.850631	0.842216	chr5:81451950	chr4:62069223	1016	+	ENSMUSG00000037605	0.471014	0.00724638	1.19018	1.31168	1.07257	0.873584	1.21258	1.08552	1.25093	0.973077	0.684739	0.341365	0.315261	0.658635	0.909013	0.665478	1	1	FALSE	FALSE	0	0	0	TRUE
mm_Sliding_topH3K27Ac_slide_-20_chr7:120491125	461	172	259	671	149	449	394	379	396	625	1528495961	AGAGATATGTAGACATGTTGCCAAATGCCATCTGTAAAGCTAATTCCAGCTCTGACAGCTTGCCAGGTTTTAGGAACTAGGATGCAGATAACTCCTTCCTTTCAGTATCACTGTATCCCTTGTAGACAGTAACTCTTT	mm	chr7:120491125	FALSE	0.924737	0.778051	chr7:120491105	chr11:13462017	286	-	ENSMUSG00000038187	0.413043	0	0.934376	2.22499	1.03724	0.82825	3.04985	1.51312	2.28148	0.932743	0.763052	0.0240964	0.236948	0.975904	0.929525	0.171624	1	1	FALSE	FALSE	0	0	0	FALSE
mm_Sliding_topH3K27Ac_slide_-60_chr16:90710185	1560	2526	1782	3536	1045	1467	1600	1510	2139	1392	1575198871	AGAGCACCGCTGTTGCCTTGGAGACAGTGCCCAGCAGGCTGGCGTCACGAGACTTTGCAGGTCCTGCTCCAGGGCTGGCAGCCAATGCTGACTAATTCAGTGTGACTTGGTTATGGCTTTGTTGGAGACACAACGATG	mm	chr16:90710185	FALSE	1.6861	1.88697	chr16:90710125	chr21:33629476	-17319	-	ENSMUSG00000022978	0.557971	0.0289855	1.95658	1.67181	1.52161	1.48163	1.47154	1.4844	1.81419	1.78653	0.0220884	0.0742972	0.977912	0.925703	0.162375	0.327844	1	1	FALSE	FALSE	1	1	0	FALSE
mm_Sliding_topH3K27Ac_slide_-80_chr7:28232880	30	46	22	33	131	113	135	165	186	213	1733068108	AGAGCACGGTGGGCGTAACGCCCCGGCCGGCCCCGCCCCGCTCAGCCCCGCCCACTAAGGGTGGCTGTCTCTAGTAGGCAGAGCGCTAAGTGACAAACTGCTCTAGCACCGCCCACTCCCTTCCCTAGAAGGGGCGTG	mm	chr7:28232880	FALSE	0.929728	1.07232	chr7:28232800	chr19:40971844	-276	+	Blvrb	0.673913	0.0797101	0.284228	0.124461	0.765967	1.05805	0.225743	0.146188	0.204344	1.00103	0.638554	0.983936	0.361446	0.0160643	0.898186	0.988543	1	1	FALSE	FALSE	0	0	0	TRUE
mm_Sliding_topH3K27Ac_slide_-60_chr11:103559390	2948	4106	4712	4959	2820	2357	2328	2197	2811	4073	529055533	AGAGCCTCCCCCGAGAAGTCGCCGGCGACTCTCTACGTCGCTCTCCGCCCCGCGGTCGGGCTTGGCTTCTCCTTGGAGTGTGTAATTACAGGTCTGGGGAATCTCACTTCCTCACGACGCGTGCTTTTCCTGCCTCGA	mm	chr11:103559390	FALSE	0.838437	0.847499	chr11:103559330	chr17:45000088	58	-	ENSMUSG00000020946	0.615942	0.101449	1.17855	0.868833	0.835519	0.736746	1.03049	1.45451	1.2425	0.842968	0.895582	0.353414	0.104418	0.646586	0.976353	0.679703	1	1	FALSE	FALSE	0	0	0	TRUE
hs_Sliding_topH3K27Ac_slide_-20_chr4:41541220	703	478	773	1574	352	685	521	686	799	787	137413819	AGAGCCTGGCGAATCCCTATGGCAAAATGATTCATCTTTGTGGAGTCGGGAAATCTATTTTTATCACCTTTATTCAGCCAGCTCCTGATTGTGATTCTCTCACTGAGCTACAGCCGTTTTCTTCATGGTGCTGAATAG	hs	chr4:41541220	FALSE	0.971102	1.24671	chr4:41541200	chr5:67290445	NA	+	ENSG00000064042	0.434783	0.0217391	1.09917	2.20929	1.25669	1.19056	1.96868	1.9116	1.94014	1.22362	0.2249	0.060241	0.7751	0.939759	0.598048	0.31382	1	1	FALSE	FALSE	0	0	1	FALSE
mm_Sliding_topH3K27Ac_slide_-60_chr17:6079805	141	94	220	239	154	370	261	260	239	391	1032734271	AGAGCTCACCCTCCGCCACCACTAGTAACCTGCGCCCTAACCCAGCGGCAGTGAGCACGTGACCCCGCCTCTGAGGGCTTGACCCCGCCCTTAGGGCCCGCCCCAGAGAGTCGCCCCACCTACTAGGGTGTCGCAGGC	mm	chr17:6079805	FALSE	0.979187	0.750609	chr17:6079745	chr6:158589355	-100	+	ENSMUSG00000034345	0.681159	0.0652174	0.494068	0.766776	1.36627	0.908237	0.902531	1.24354	1.07304	1.13725	0.35743	0.514056	0.64257	0.485944	0.735808	0.790562	1	1	FALSE	FALSE	0	0	0	TRUE
mm_Sliding_topH3K27Ac_slide_-80_chr8:97362830	283	476	408	570	288	275	228	212	261	383	640093655	AGAGCTCGTCCGTTCCAAAGCGTTCTCCGTCGCCGTAGGCGCTGTGCCAGCCTCGCTGGAGAAACCGACCGAACAGCCACAGAGTCAGTTATTGCCACACCACGTCACTAAGCTGGTGACATTCGTCATTTGCTGCCA	mm	chr8:97362830	FALSE	0.873249	0.836825	chr8:97362750	chr16:57481936	342	+	ENSMUSG00000031782	0.572464	0.0869565	1.33781	0.977853	1.03668	0.756031	0.968629	1.23318	1.15783	0.896356	0.817269	0.439759	0.182731	0.560241	0.949792	0.751902	1	1	FALSE	FALSE	0	1	0	TRUE
hs_Sliding_topH3K27Ac_slide_80_chr14:51607151	925	1082	1418	2216	1053	1564	1435	1859	1872	2422	1343110775	AGAGCTTTGACGGCAAGCCTCTTGGCTTCATCTTGACTTTCGATCACGTTCTTCCTCTGGTGACTATGTAAATGAATTCATAATATTTAACACATCTCAACACACGTGCCCCTTCTGTTTTCTTTGCACCACGTTGTA	hs	chr14:51607151	FALSE	0.86912	0.949127	chr14:51607231	NA	NA	-	ENSG00000100505	0.42029	0.0362319	0.831723	1.03976	0.932339	1.04835	0.865918	1.17221	1.01907	0.990346	0.658635	0.576305	0.341365	0.423695	0.900463	0.833385	1	1	FALSE	FALSE	0	0	0	TRUE
mm_Sliding_topH3K27Ac_slide_-20_chr16:9281175	716	1467	959	1970	439	576	482	644	601	627	974829043	AGAGGAACTGCCTTGGGATACTCTGCTCTCTCGGAGCCCCTCCTCCACACTGGCAGCTGCTGACCTCCTGTTCACTAAGCAACTGAGCAGCACCGTTTGCCTCATAGTGACGCACCAGCAGGTGGTTACCATGGAATG	mm	chr16:9281175	FALSE	1.12767	1.17706	chr16:9281155	chr16:9583844	284676	-	ENSMUSG00000090530	0.565217	0.0217391	2.70486	2.21714	1.32637	1.40288	1.60773	1.90157	2.461	1.36463	0.120482	0.0140562	0.879518	0.985944	0.454022	0.117695	1	1	FALSE	FALSE	0	0	0	FALSE
mm_Sliding_topH3K27Ac_slide_-20_chr16:95925015	60	64	63	111	88	109	189	174	203	203	458356411	AGAGGAGTCATTTAATTCGCCAGTTGAGAGACTTGCTCCCGCTGTGGAAGCTCCTGTCGGTATCTGCCTGCCTACACCACCGCCAATCCGGAGATACATCTCAGTGTTAAGCTTTTATTAAAATCTGAGTAATCTCGC	mm	chr16:95925015	FALSE	1.36574	1.22798	chr16:95924995	chr21:40178998	869	+	ENSMUSG00000022895	0.478261	0.0434783	0.588677	0.623206	0.77525	1.17073	0.672097	0.623185	0.647641	1.29686	0.160643	0.869478	0.839357	0.130522	0.516062	0.950006	1	1	FALSE	FALSE	0	0	0	TRUE
mm_Endogenous_chr10:127963245	1150	1704	1354	2644	909	1116	1090	805	1377	1610	618444575	AGAGGCGGGAGCAGCTGCTCCTCCCACGTGGGATTGGAGCGCCTGTGGAGTTACGTCATGCAGAGCCGCTACTCTAATTACTGAGTTCAGAGTGAGCTAGAGTTGAGGGTGTATCTCTCCACACGTTCAAATGGTTTG	mm	chr10:127963245	FALSE	0.993122	1.05027	chr10:127963245	chr12:56521656	319	-	ENSMUSG00000025366	0.536232	0.0434783	1.51735	1.43711	1.00081	0.682924	1.24709	1.29662	1.47723	1.0217	0.590361	0.178715	0.409639	0.821285	0.878124	0.501658	1	1	FALSE	FALSE	0	1	0	FALSE
mm_Sliding_topH3K27Ac_slide_-60_chr6:141444305	46	23	24	49	38	240	297	288	339	310	1133399965	AGAGGGAGGGGGCTTTTATCCCACCTCATAATTAAATCTGAAAGGTTCCTGGGGCGAGCTAAGAGGTTTCTAATGAAGTACTAAGCTGTGCTTGGAGTCTGCACCACGAAAGGCGCTTTGTTCTCCTTTCAAAAGGTT	mm	chr6:141444305	FALSE	1.40539	1.34286	chr6:141444245	chr12:20810572	-28721	+	Slco1c1	0.463768	0.0217391	0.489918	0.637094	1.11779	1.26892	1.19327	0.549777	0.871522	1.37412	0.110442	0.732932	0.889558	0.267068	0.427448	0.913817	1	1	FALSE	FALSE	0	0	0	FALSE
mm_Sliding_topH3K27Ac_slide_-100_chr13:43035850	29	34	49	151	45	21	44	50	51	107	1007437393	AGAGGGGTATAATTTTGTGTGTGTGTGTGTGTGTGTGTGTGTGTGTGTGTGTGTGTGTGTTCCATCTTAGAGACCGGCTTCCTTTAAATGAATATTCAAATGTTGGAATGAAAGTCATGATGGGATTTGGATTCATTA	mm	chr13:43035850	FALSE	0.603213	0.585301	chr13:43035750	chr6:13038802	-58229	+	ENSMUSG00000090135	0.391304	0.00724638	0.61157	1.65789	0.283365	0.638247	0.635256	0.947857	1.13473	0.594257	0.985944	0.459839	0.0140562	0.540161	0.996686	0.762991	1	1	FALSE	FALSE	0	0	0	TRUE
hs_Sliding_topH3K27Ac_slide_80_chr9:102583356	358	295	411	634	302	372	450	443	499	546	79747899	AGAGTAGTTTCTGCTGCAGCGCGCGTGTGCATGATGGATGTGCACTTCGCTGGGTTATAACGTGTCCAGTTAAGAAACCCACGCCGTACGTGTAAAGAAATCAAACCTTATCCCCGGAACCATCTGCATCCCTGTGTG	hs	chr9:102583356	FALSE	1.20899	1.12228	chr9:102583436	chr4:48057230	NA	+	NR4A3	0.507246	0.0652174	0.790669	1.03723	0.983698	1.10819	1.16853	1.18466	1.1766	1.16563	0.325301	0.421687	0.674699	0.578313	0.721268	0.738221	1	1	FALSE	FALSE	0	0	0	TRUE
mm_Sliding_topH3K27Ac_slide_-80_chr6:17615370	42	27	29	78	40	77	150	70	107	145	1726531445	AGAGTATTCTGAAAATGTCCTGTGTTGTAAGTAGTTGTTTCCTGATTTAAACATCTAACCACTGTTTCTTGTAGACTGCCATCAGTGAGAATTATCAGACGATGTCGGACACTACCTTCAAAGCCTTACGTCGACAGT	mm	chr6:17615370	FALSE	1.51749	0.906168	chr6:17615290	chr7:116557856	4605	+	ENSMUSG00000015733	0.398551	0.0289855	0.546366	0.963442	0.766715	0.659375	1.03503	0.631099	0.833064	1.21183	0.242972	0.761044	0.757028	0.238956	0.622015	0.921206	1	1	FALSE	FALSE	0	0	0	TRUE
mm_Sliding_topH3K27Ac_slide_-80_chr15:96471305	482	431	610	1100	445	936	889	1010	1272	1418	764002065	AGAGTCATTTAAGTCATTTTAAGACAGAGGTTAGGCGGCCATACCAGACCCGTGCAGTGGCGGGACTTGCCAGTTTCCTATAGGGTGAGTTATTTGACAATGAGGCCAGCCAGCTCAGGTTTTATTTCCGTTGTCCTT	mm	chr15:96471305	FALSE	0.91966	1.10155	chr15:96471225	chr12:46660828	-1248	-	Slc38a1	0.478261	0.0289855	0.783965	1.2213	0.95304	0.972854	1.0677	1.19324	1.13047	1.0106	0.614458	0.461847	0.385542	0.538153	0.888931	0.763739	1	1	FALSE	FALSE	0	0	0	TRUE
hs_Sliding_topH3K27Ac_slide_-80_chr2:28114146	4475	4808	5867	14797	4241	9228	12909	13929	14130	14268	1943932466	AGAGTGTCCCTTTTTAAGACGTCCCCTAGAGTGGGGTGGTCATTCTTCGGGTCTGAGCTAACTTGTTTTTCTCGAATGTTGCCCCTTGGGGGAAATTGCTTCCCCAGTGTAACTTCCCTCGTGCGCTGTATGACGTCG	hs	chr2:28114146	FALSE	1.32718	1.21611	chr2:28114066	chr5:32000875	NA	-	BRE-AS1	0.514493	0.0507246	0.917647	1.72384	0.933804	1.3334	1.04013	1.20422	1.32074	1.27165	0.180723	0.277108	0.819277	0.722892	0.544707	0.603625	1	1	FALSE	FALSE	0	0	0	FALSE
mm_Endogenous_chr2:37374660	4525	8160	8752	14480	3425	5465	4590	5023	5542	6529	1810132020	AGAGTTTTGAAATGAAGCAACTGTGCAGTGAAGCCATACAGTGTGTGAGAGCCAGCTGCTTTCACGACATGCTTCTGAGCATCGTGAGCATGTGTGCAGTAATGACATTACAGTGCTCTTTCTGGGCCTCTGTCTGTA	mm	chr2:37374660	FALSE	1.03126	1.04235	chr2:37374660	chr9:125798586	2515	+	Gpr21	0.471014	0.0144928	1.92845	2.08881	1.20852	1.0508	1.30233	2.22436	2.00863	1.12966	0.36747	0.0542169	0.63253	0.945783	0.739897	0.305626	1	1	FALSE	FALSE	0	1	0	FALSE
mm_Sliding_topH3K27Ac_slide_-80_chr11:97564685	2217	1852	2562	2011	1419	3046	2490	2767	2332	3540	2033271351	AGATCCCAACATGCCCCGGACCGTAGGCTCTTCCGCACTCACAGTGACTTTTCACTTTCCGCTTTCCATACCTCCGTTTTGGTGTCTCAACCAAACTATGCATATTTGTGACTGACGGCATGAGTGTCCAATAGAAAG	mm	chr11:97564685	FALSE	1.03181	0.808943	chr11:97564605	chr17:36908962	-187	+	ENSMUSG00000069744	0.485507	0.0434783	1.05642	0.700198	1.24233	1.0676	1.54009	1.57165	1.55587	1.15497	0.333333	0.136546	0.666667	0.863454	0.72202	0.429664	1	1	FALSE	FALSE	0	0	0	FALSE
hs_Sliding_topH3K27Ac_slide_80_chr9:125798586	335	185	223	721	165	559	584	573	697	610	1970759351	AGATCTAAAGATATGTGTGCGTAGAAGTAATCGTGTAGTACTTTTGCCCATGCCTTTGTGTTATGTCTATATTTAGAATATCTGAATTGTTAGATTTCTCTTTTACAGCAAAATGTGCTTAAGCTAAAAAGTAATTCA	hs	chr9:125798586	FALSE	1.40438	1.40312	chr9:125798666	chr2:37374660	NA	+	uc031tfa.1	0.311594	0.0144928	0.907543	2.15895	1.3231	1.283	2.00136	1.17647	1.58891	1.40375	0.0963855	0.126506	0.903614	0.873494	0.396927	0.421237	1	1	FALSE	FALSE	0	0	0	FALSE
mm_Sliding_topH3K27Ac_slide_-80_chr9:60685375	596	438	453	1140	395	709	763	788	1076	1089	372337130	AGATGGCCCTAAGATTGAAACTGGCTTTAAATACTGTTTTGTTGAATAACCAGATTTGTCTGTCCGCCTCCCACCCCCTGGTCTTCTTGTCACACACTCACACTGACTGTATTGACGTGGTCAGCGTGTTTCACAATG	mm	chr9:60685375	FALSE	1.02778	1.21333	chr9:60685295	chr15:70994836	-792	-	ENSMUSG00000052143	0.456522	0.0217391	0.897546	1.42593	0.940004	0.988327	1.48735	0.998298	1.24282	1.12055	0.37751	0.353414	0.62249	0.646586	0.746969	0.679703	1	1	FALSE	FALSE	0	0	0	TRUE
hs_Sliding_topH3K27Ac_slide_20_chr2:197924391	151	112	113	396	149	433	392	411	540	609	1675964740	AGATGGGAGAGACAGACACACATGTATTCAGATATGCGCCTGCCTCACATTTAATCTTTTATGAATGGCTGCTCCCAGATGGTGATGTGATTCAGCAATGCAATTTTAGATACACCATCTATTTTCCTTACTTCAATG	hs	chr2:197924391	FALSE	0.944214	1.08885	chr2:197924411	chr1:54764910	NA	-	ENSG00000065413	0.398551	0.00724638	0.608431	1.31311	1.02655	0.921779	0.998974	0.660163	0.960769	1.01653	0.60241	0.654618	0.39759	0.345382	0.886443	0.880951	1	1	FALSE	FALSE	0	0	0	TRUE
mm_Sliding_topH3K27Ac_slide_-40_chr16:35984180	206	265	258	815	213	461	500	604	741	566	730188757	AGATGTCATAACTACGCGGGCCTGGAGCTGCTGACGGGGGTGTGGTAATTATAGCAATGACAAGTTGGTCGGCTGTGTGAGCCGGCGATGCGAGGGAAACCGCCAAGCCTTAGCTGAGGCTCGCATTGGGAGCAGAAA	mm	chr16:35984180	FALSE	1.29585	1.60766	chr16:35984140	chr3:122232931	433	+	ENSMUSG00000022905	0.565217	0.0652174	1.00704	1.89047	1.17597	1.45755	0.953347	1.05439	1.44875	1.45176	0.0843373	0.190763	0.915663	0.809237	0.378471	0.514446	1	1	FALSE	FALSE	0	1	0	FALSE
mm_Sliding_topH3K27Ac_slide_40_chr2:4058710	3230	3256	2573	6269	955	1999	1575	2142	1917	2040	1980184525	AGATTTCAACAGCCTATAAAGACCCATGATTGGAATCTTGCTTCTATGATGCCATAGCAATTCAGATGGTTCTTAAGTCTCCATGGCAACAGCCAACACTACATTTTGTCCTTTGAAGTCACATGACACCTGATGTCA	mm	chr2:4058710	FALSE	1.13254	1.15394	chr2:4058750	chr10:14233660	-29	+	ENSMUSG00000086921	0.405797	0	2.75969	3.24329	1.4148	1.43414	3.33398	2.34528	3.00149	1.42447	0.0923695	0.0100402	0.907631	0.98996	0.391775	0.106055	1	1	FALSE	FALSE	2	1	0	FALSE
mm_Sliding_topH3K27Ac_slide_-100_chr12:53390420	1865	1460	1361	3718	953	2058	1597	1788	1675	2257	226981287	AGCAAAGTGTTCAGTTAGAAAGTGCCCCGTAATGCAGAGGCAGTGCTGCGCAGTTTATCCCACTTCATTCCTGTTCCCCTGCTTTTCAGCCTTGTTCTGTTTTCCCCCTTTTGAAGTGCATTAGTTACCATGGAGACA	mm	chr12:53390420	FALSE	1.03795	0.911331	chr12:53390320	chr14:32298938	113147	+	ENSMUSG00000035142	0.471014	0.0144928	1.24005	1.92756	1.31651	1.08203	1.92908	1.24315	1.58611	1.19927	0.259036	0.126506	0.740964	0.873494	0.644867	0.421237	1	1	FALSE	FALSE	1	0	0	FALSE
mm_Sliding_topH3K27Ac_slide_80_chr3:25496555	94	63	44	181	93	194	265	228	230	471	889374723	AGCAATTTACAGTGCTTCCCAGGCCTACATTTATTTTATAGCTGCCATATGAGATTTTATTTCTGGATGAAAGCTGCATTGATAAAGAGGTTTAATTGTCTGTCAGTACGCCTTATGGTGAAGTTGTTTCATTTACTC	mm	chr3:25496555	FALSE	0.825328	0.599653	chr3:25496635	chr3:173820910	51774	+	ENSMUSG00000087945	0.362319	0.00724638	0.548324	0.961583	0.594692	0.661175	0.996342	0.41184	0.754953	0.712491	0.965863	0.811245	0.0341365	0.188755	0.989773	0.928905	1	1	FALSE	FALSE	0	0	0	TRUE
mm_Sliding_topH3K27Ac_slide_80_chr3:89154275	735	891	920	1596	598	222	202	272	209	272	1168681725	AGCACGACCGGCAGTACAGGGCCTTGCAGTCTGGTGTGGGGCACACGTAGGAATCCGGCGTCTCCATTGCCTGGCACACCACACAGCGCTGACGCATGAAGCGGTGCAGGAGAGGGCACCGGCGATACAGAGCCTCCA	mm	chr3:89154275	FALSE	1.08939	0.943562	chr3:89154355	chr1:155023272	503	-	Adam15	0.637681	0.0724638	1.20602	1.31863	1.17841	1.36585	1.21157	1.3392	1.27539	1.27213	0.180723	0.315261	0.819277	0.684739	0.544707	0.63552	1	1	FALSE	FALSE	0	0	0	TRUE
hs_Sliding_topH3K27Ac_slide_-20_chr8:102803243	292	365	316	552	153	176	231	175	203	165	985255546	AGCAGCAGCAAGGTCCAGCATCCACCAGATTCTCACAAGCCTTTGACTGTGTGGACTCAGCCACAGACTCTGCCTCTAGCTGACGTCAAAGTCCCTGTCACATGGCCAGATGAAAGCCAAGAGATCATTGGTTGTCGT	hs	chr8:102803243	FALSE	2.05367	1.51079	chr8:102803223	NA	NA	-	ENSG00000104490	0.521739	0.0144928	1.93099	1.78254	1.54007	1.44863	1.88129	1.79786	1.85677	1.78223	0.0220884	0.0722892	0.977912	0.927711	0.162375	0.327844	1	1	FALSE	FALSE	0	1	0	FALSE
mm_Sliding_topH3K27Ac_slide_-60_chr13:107737255	38	80	37	30	308	733	649	771	938	1049	46702047	AGCAGCCACTGGGCTCCGGCCTGCCGCTGACTGGGTGGGTCGGTGATCGCAGTGGGCGGGGAAGTGGGCCTCTCGGGCGCCTAGTCGTGACGGCGACTGAGGGCGACTTCCACGCGGTTCCCGGCTGCTTTCGCTTGG	mm	chr13:107737255	FALSE	0.907551	1.09805	chr13:107737195	chr5:61699682	-73	+	Dimt1	0.702899	0.108696	0.210242	0.048124	1.00888	1.00388	0.121618	0.104571	0.129183	1.00638	0.624498	0.995984	0.375502	0.00401606	0.894037	0.996855	1	1	FALSE	FALSE	0	0	0	TRUE
mm_Sliding_topH3K27Ac_slide_-20_chr8:108130750	1900	2232	1618	5497	896	539	492	536	731	622	1472222951	AGCAGGCCCCCCTCCCCTTTTCAGTGGCAGTTCTGGTTGGCGGCTGCCAGATGACGTCAGCAACTAGGTTTGGGGCAGTTGCCATGGAGACAGGGACAGGCTTTTGCGCGCGACCCCCTTCTCCCTTGCAGCCACCCT	mm	chr8:108130750	FALSE	1.16032	1.44318	chr8:108130730	chr16:67564359	1582	+	Fam65a	0.623188	0.0362319	2.01635	3.03116	1.25115	1.177	2.0903	1.57192	2.52375	1.30175	0.154618	0.0120482	0.845382	0.987952	0.504568	0.106055	1	1	FALSE	FALSE	1	1	0	FALSE
hs_Sliding_topH3K27Ac_slide_-60_chr21:33629476	410	798	550	1115	314	487	506	464	595	585	176175773	AGCAGTTGTTGCCTTGGAAACTCTGTCCAGGGGCTGGCATCACGGGACTTGGCTCGCCTGCTCTATGGCTGACATCCAAAGCTGACTCACTTAAGTTTCGACTGGTTATGGCTTCGCTAAGGGGGACATAGCGATTGA	hs	chr21:33629476	FALSE	1.26881	1.24898	chr21:33629416	chr16:90710185	NA	-	ENSG00000261610	0.528986	0.0362319	2.05709	1.75443	1.20194	1.08334	1.28712	1.52473	1.90576	1.25889	0.192771	0.0662651	0.807229	0.933735	0.56322	0.326851	1	1	FALSE	FALSE	1	0	1	FALSE
mm_Sliding_topH3K27Ac_slide_-40_chr15:97998220	178595	176452	118927	315029	25860	67400	64403	70309	61561	37700	841451208	AGCATCCCTGCCCCGCCCGTCAGCCCATACAACAGAGCTTCACTGCAGCTTCGGAACCCTGTTCTCTTTCTTCCTCACTTCCTCGTTGCCATGGAGACACACGTCATTTACGTGCCGTGCGTCGCCTTGGAAACGGGG	mm	chr15:97998220	FALSE	2.50592	2.0052	chr15:97998180	chr12:48577365	-96	+	Ccdc184	0.57971	0.0724638	5.52303	6.01884	2.58125	2.54725	6.80776	4.00324	5.77094	2.56425	0.00200803	0	0.997992	1	0.0259157	0	1	1	FALSE	FALSE	2	0	0	FALSE
mm_Sliding_topH3K27Ac_slide_-60_chr4:151851750	104	120	71	121	151	229	305	303	340	405	296125056	AGCATCTTTACCTCGTGGGACTCCCTCGGCCACGCCCCTAGCAGCCTATTATTGGCTATGCTTCACGCCAGTCACAGTCTCATTGGCAATGGCCAAGGCAGTCCATGCAAATCATGCAGCTCCCGCCGATGCGTGGAT	mm	chr4:151851750	FALSE	1.10471	1.0309	chr4:151851690	chr1:6052584	-28	-	Kcnab2	0.565217	0.0507246	0.643256	0.395913	0.816379	1.02186	0.678922	0.409299	0.54411	1.0678	0.493976	0.915663	0.506024	0.0843373	0.831284	0.965522	1	1	FALSE	FALSE	0	0	0	TRUE
hs_Endogenous_chr3:156544025	125	352	98	363	232	312	452	313	750	452	1343227388	AGCATTCCGCGTAAGACTAGCCCAGCCTTCCGAGCCCCACCACCAGTTTTCCCACTTCCGCCCGGCGCGTGAGACCCTGGGCGGTGCAGGGGAGCGTTGACGACAGACGTGGGCCGTGACGTCGCCGCGCCCTGACGT	hs	chr3:156544025	FALSE	1.4669	2.03758	chr3:156544025	NA	NA	+	uc003faz.1	0.681159	0.123188	1.2281	0.773054	0.996615	0.94582	0.531111	0.367703	1.00058	1.75224	0.0261044	0.606426	0.973896	0.393574	0.185541	0.853921	1	1	FALSE	FALSE	0	0	0	FALSE
mm_Sliding_topH3K27Ac_slide_40_chr4:49533995	2101	1420	2098	3106	429	2008	1204	2262	1494	1425	1479101112	AGCCAATCAGATGAGAGCTTACTTCAGCGGCCCCTGACGTTGCCCAGACCTATGCATTCCGGGAAATGTAGTTCGCTTGCCATTTACGGAAGAAGGCGGTGGCTCGCTCCCTGGGCATGTTGGGAGTTGTAGTTGGAG	mm	chr4:49533995	FALSE	1.23941	1.28744	chr4:49534035	chr9:104160960	110	-	ENSMUSG00000044018	0.550725	0.0507246	2.67923	3.57713	2.03451	2.1681	4.82761	4.25704	4.54232	2.10131	0.0140562	0.00200803	0.985944	0.997992	0.130419	0.0626689	1	1	FALSE	FALSE	0	0	0	FALSE
mm_Sliding_topH3K27Ac_slide_40_chr15:37389160	167	584	294	534	164	214	255	218	225	342	329251135	AGCCACAGACTCTGCCTCTGGCTGACGTCAAAGTCCCTGTCACATGGCCAGATAAAAGCCAAGAGAGCATTGGTTGTCGTAGCAACCACAGACTGGCTCTGAAATTATTTCAATAGGTCATCTGTCACTGATGTGTGT	mm	chr15:37389160	FALSE	1.09374	0.807884	chr15:37389200	chr8:102803244	103	-	Ncald	0.478261	0.0144928	2.88236	1.60875	0.903439	0.870628	1.00377	1.5605	2.24556	0.950814	0.720884	0.0240964	0.279116	0.975904	0.915912	0.171624	1	1	FALSE	FALSE	1	1	0	FALSE
hs_Sliding_topH3K27Ac_slide_-80_chr4:39184053	1126	1250	1379	1905	1059	1181	1222	1226	1264	1559	86795137	AGCCAGGAAGCCGAGGCTCAGCAAGGCCTCGCGACGCCCAACTTCCCAGGGTTAGCGTCTCTGATGTCATGTGATTCCACCCTCCGCCTCTCACCCACCCTCGCAGAGGGCGGTGCGCTTGGCCCGGCCCCTCGAGGC	hs	chr4:39184053	FALSE	1.14981	0.99562	chr4:39183973	NA	NA	+	WDR19	0.673913	0.0797101	0.955418	0.888772	1.09374	1.07411	1.04811	1.13352	1.09081	1.08392	0.457831	0.5	0.542169	0.5	0.808506	0.787024	1	1	FALSE	FALSE	0	1	0	TRUE
mm_Sliding_topH3K27Ac_slide_40_chr16:85801100	2640	3466	3031	5584	2598	6124	5188	4311	9182	9585	1085464942	AGCCAGGGCTGAAATCCCGAATGAGATCATCCAGCTCCACGTGGAAGGCATGGGGCAGGGCGGGGAGCCTCAGCCAAGGGGTGGGGCTTGAGGAGTCTCAGTCTGTAAGGCTCAGCTCTCTCATTCAAGGGGTCCCAG	mm	chr16:85801100	FALSE	0.79398	1.17635	chr16:85801140	chr21:28215402	-546	-	ENSMUSG00000022893	0.608696	0.0217391	1.07986	1.06193	0.922474	0.614311	1.00168	1.01556	1.0709	0.985167	0.664659	0.514056	0.335341	0.485944	0.900463	0.790562	1	1	FALSE	FALSE	0	0	0	TRUE
hs_Sliding_topH3K27Ac_slide_-80_chr12:52430794	1161	1872	1533	2723	737	1462	1365	1441	1602	1760	1444515086	AGCCCCGGCTAAGTTTCTTTATAACCTAGCCCCAGGTGCCCAGCCTCGGAAGGTGTGAGCGAGACCTCGGCACCCTCACCTGAGAACCAGCTCCCCGGCTCTGGCCGCGGGTTATGTAACCGGGTGTGCGGCGTGGGG	hs	chr12:52430794	FALSE	1.13768	1.11774	chr12:52430714	chr15:101084465	NA	+	ENSG00000123358	0.644928	0.0724638	2.05598	1.82546	1.19935	1.11829	1.55285	1.81065	1.94072	1.15882	0.331325	0.060241	0.668675	0.939759	0.721268	0.31382	1	1	FALSE	FALSE	0	1	0	FALSE
hs_Sliding_topH3K27Ac_slide_-40_chr17:36981653	3629	2979	4324	5500	957	1142	397	1225	390	96	1502654093	AGCCGTCAACTGCCAGTTTCACCACCGCTCTAGAGGTCACTTCCGGGAGGGCGTCATCTCACCGCGTCGGCGTCGCGGAACGATGACGTACAGGGCTCGGTCGCGCTTTGTGACGTTGGCGTTACTTGCAGATTTTGC	hs	chr17:36981653	FALSE	6.06626	4.98869	chr17:36981613	NA	NA	-	ENSG00000108296	0.601449	0.123188	2.51964	2.8395	17.1754	17.4288	3.73799	3.93308	3.83554	17.3021	0	0.00401606	1	0.995984	0	0.0770232	1	1	TRUE	TRUE	0	0	0	FALSE
mm_Sliding_topH3K27Ac_slide_-60_chr17:34973915	152	183	239	415	135	125	116	148	159	267	469378943	AGCCTCAGACGCCAGGAGCCGTCTCTTGCGATTCATAACCCGGATTTCAGGATTCCGGGAAAGGAGTCCCGAAGACCGCGTCTTCCGGCACAGAATAATGACGACGGGCCCTCTGGCTGGTCGTCTGAGTTTGATGAC	mm	chr17:34973915	FALSE	0.637307	0.731272	chr17:34973855	chr6:31940003	-95	-	ENSMUSG00000061207	0.572464	0.0869565	1.09723	1.51882	0.675943	0.757099	1.10987	1.54107	1.32547	0.716521	0.963855	0.277108	0.0361446	0.722892	0.989773	0.603625	1	1	FALSE	FALSE	0	0	0	FALSE
mm_Sliding_topH3K27Ac_slide_80_chr13:57696860	721	763	522	906	337	603	737	745	832	1098	607117114	AGCCTCTCGGAATACAAATTGCGCTCATTGGATCTTGCTGGAAGCTGGGAAGGACGGCAGCCTGGAAAGTCTCCTTCATTACTCTCGGCTTTCACATTCAAGGGCTTCCCAAGTTCTTTGAGGCTGAACAAAGAGACT	mm	chr13:57696860	FALSE	0.984616	0.930495	chr13:57696940	chr5:136482372	-100496	-	ENSMUSG00000056222	0.492754	0.0289855	1.83263	1.32828	0.792914	0.926737	2.10896	1.34834	1.72865	0.957555	0.714859	0.0903614	0.285141	0.909639	0.912309	0.356155	1	1	FALSE	FALSE	0	0	0	FALSE
mm_Sliding_topH3K27Ac_slide_-40_chr4:49533995	2582	2067	3236	3969	1187	1633	1566	1495	1739	1749	383034775	AGCCTCTTCTTGCTAACCGAGACACGATCAGCGCCGCCATTCTCGACAAGCAACCCAAGAGCGCCAGACGTGCCCGACTCAGCCAATCAGATGAGAGCTTACTTCAGCGGCCCCTGACGTTGCCCAGACCTATGCATT	mm	chr4:49533995	FALSE	1.31342	1.22096	chr4:49533955	chr9:104160960	-50	-	ENSMUSG00000044018	0.572464	0.0724638	1.40951	1.65204	1.34806	1.16749	2.14422	2.3731	2.25866	1.26719	0.182731	0.0240964	0.817269	0.975904	0.547874	0.171624	1	1	FALSE	FALSE	0	0	0	FALSE
mm_Sliding_topH3K27Ac_slide_-60_chr11:51076595	1385	1838	1784	1935	1938	2261	1952	2165	2593	2369	408044401	AGCCTGACAAGCGGACAGAACCTCGTCCTACCCGCGCCTCCAGCGCTGCGCAGCCGCAGTGTGGCTGATCAAGCCCCGCCGTCCCTGACGTCACAGACCCCTCGTCCCCTTGCACGATCTGTGGGCGGGCACGAGGCT	mm	chr11:51076595	FALSE	1.20869	1.3441	chr11:51076535	chr5:178054192	-140	+	ENSMUSG00000020385	0.681159	0.101449	0.767664	0.493308	1.37799	1.24823	0.704465	0.801309	0.752887	1.31311	0.146586	0.815261	0.853414	0.184739	0.486213	0.928905	1	1	FALSE	FALSE	0	1	0	FALSE
hs_Sliding_topH3K27Ac_slide_80_chr3:185080927	1147	1132	936	3659	1081	2116	1619	1789	2074	3047	1782815610	AGCGAAGTCTGTGCGGAATCCTAAACCAGCCCAATTTACATCCATTCATGAATCTGTGACGTCAGCAAGCCTTTGGGCTCCTTTGCGGTGGGCTGGAGGATTGTGTGGGTGGAATCCCCCTCCCCTTTATTTTTCCAA	hs	chr3:185080927	FALSE	0.779428	0.835852	chr3:185081007	chr16:21846060	NA	+	ENSG00000073803	0.507246	0.0289855	0.847618	1.67235	1.00266	0.801937	1.04593	0.753719	1.25999	0.902299	0.803213	0.333333	0.196787	0.666667	0.939288	0.657663	1	1	FALSE	FALSE	0	1	0	TRUE
mm_Sliding_topH3K27Ac_slide_-80_chr2:66246900	104	153	96	196	149	193	168	165	329	398	792741420	AGCGCACCAGATAGACAGTGCAGACCTGCAGATCCATACCCGAGGAGAAGCCACATTTCCTACGTGTGATAGCAACAGCGTTTGGCAATTTGCGACTTTGCTACTGCAGCTTAGAAAATATTTAGTCACATGCACATC	mm	chr2:66246900	FALSE	0.619196	1.01509	chr2:66246820	chr2:166983283	-810	+	ENSMUSG00000085386	0.471014	0.0362319	0.83116	0.649922	0.700141	0.566244	0.688035	0.560847	0.740541	0.817144	0.909639	0.815261	0.0903614	0.184739	0.980468	0.928905	1	1	FALSE	FALSE	0	0	0	TRUE
mm_Endogenous_chr2:167460085	19852	15541	23861	19058	5295	8516	7703	9346	8603	15786	448274740	AGCGCCCCGGGGCATGCTGGTTATTGTAGTCCAGCGGTGGCCTGCTGGGAGTTGTAGTACTTGGAGTTCACATTTCCCTCAAGGAGACTCCGCCCCTTTCCATGCGTCACATCGAGTCCCCAGAGAGGGATTCCTCTT	mm	chr2:167460085	FALSE	0.715797	0.669223	chr2:167460085	chr20:48732578	2490	-	ENSMUSG00000078923	0.572464	0.0434783	2.37571	1.77829	0.778888	0.808642	3.69574	3.92267	3.80921	0.793765	0.931727	0.00401606	0.0682731	0.995984	0.988136	0.0770232	1	1	FALSE	FALSE	0	0	1	FALSE
hs_Sliding_topH3K27Ac_slide_-80_chr2:170550944	125	405	211	433	171	286	153	285	280	296	1384326101	AGCGCCGTCCAAACCGTACCAGCATCTCTGACGAGGTGTCCATGATGCTCCTAGATCTGGAAAAGTGACTGTGGCGCCAAGCGCCGCGGACGCCAGCCGGTGGAGTTGTTACTCGTACCACGCGGTTGCTTGGCAACG	hs	chr2:170550944	FALSE	0.758231	1.16161	chr2:170550864	chr2:69627640	NA	-	ENSG00000154479	0.601449	0.101449	1.91707	1.25107	1.39504	1.31509	0.720572	1.0741	1.58407	1.35506	0.126506	0.126506	0.873494	0.873494	0.463991	0.421237	1	1	FALSE	FALSE	0	0	0	FALSE
mm_Sliding_topH3K27Ac_slide_20_chr1:39044485	3847	4659	5639	7015	3095	1962	1988	2386	3064	2904	1074252137	AGCGCCTGGACATGGCCCGAATGACGTCACCCTATAGTCCCACCCACCGGAGGCACGGCCTGTCATTCCAACGCTCTCAGCCTTCGCCCGGGTTCCTGAGGACCAGGCGCAGACTCCAGTCTTCACTTCCTCCTTGGC	mm	chr1:39044485	FALSE	1.0042	1.29564	chr1:39044505	chr2:101179298	-133	+	Pdcl3	0.630435	0.0652174	1.21846	1.11985	0.975469	1.12222	1.22525	1.58599	1.40562	1.14992	0.337349	0.220884	0.662651	0.779116	0.72202	0.55328	1	1	FALSE	FALSE	0	1	0	FALSE
mm_Sliding_topH3K27Ac_slide_80_chr15:76342485	143	127	184	90	77	83	84	113	142	83	2006200568	AGCGCGGAGCCTCCTGGGAGTTGAAGGCACCGGGAGCTGGTGACGTATAGCACTCTGGGAATTGCAGTCACAGGCTGGCAGAAGCAACTAGTGTGCAGCTTGGCTGTGAACTTCGGTGGAAGAGGTCCGAGGTGCTGT	mm	chr15:76342485	FALSE	1.48458	2.10089	chr15:76342565	chr8:145550616	264	-	ENSMUSG00000022555	0.586957	0.0434783	1.33503	0.577488	1.44381	1.85953	1.83066	2.08011	1.95539	1.79273	0.0220884	0.060241	0.977912	0.939759	0.162375	0.31382	1	1	FALSE	FALSE	0	0	0	FALSE
hs_Sliding_topH3K27Ac_slide_-60_chr8:110346450	1011	624	1080	828	192	434	298	351	346	331	1735486224	AGCGGCGTGGTTCCCATCCCAGAAAACACTGCGGTGCGAACTGCCTTCTGGGAAATGTAGTGTCCGTGAAAAAGTTGAGACTGTTGCATGCTGGGCTATGTAGTTCTCCTGGTACTTAACGCGCGCGCGACGGCAAGG	hs	chr8:110346450	FALSE	1.32066	1.28363	chr8:110346390	chr15:44259535	NA	-	NUDCD1	0.550725	0.0797101	2.63065	2.13069	1.8931	1.44838	5.19055	4.89645	5.0435	1.67074	0.0341365	0.00200803	0.965863	0.997992	0.221115	0.0626689	1	1	FALSE	FALSE	0	0	0	FALSE
mm_Sliding_topH3K27Ac_slide_-20_chr4:68615885	6009	7649	7446	13675	3730	6587	6293	6444	9075	9037	1541378352	AGCGTCTGGTATTTCTGATTATGCGGGAGCTTGACGTGACTGCGTGTACATACCTGAGTGGGTTTTGTCTGGGGTGACGCACGTCTGAGTCCCGTTGTGTCTCTGTGTTTCTCTGTGACTACTGGAAATTGTTTTTGT	mm	chr4:68615885	FALSE	1.02149	1.23315	chr4:68615865	chr9:122132201	414	-	Brinp1	0.485507	0.0507246	1.65988	1.81138	1.05239	0.973943	1.58802	1.73769	1.73563	1.12732	0.36747	0.0903614	0.63253	0.909639	0.739897	0.356155	1	1	FALSE	FALSE	0	0	0	FALSE
mm_Sliding_topH3K27Ac_slide_60_chr13:8995365	3186	3126	2528	4445	1342	3272	3277	3480	3548	4201	712573274	AGCGTTACATCATTTCCTGAATGTCCGCGAGGCGTGGCCCACGCGTCCGCCTAGACAGGCTTCTAGTCCCACAGCGTCCCCGCTCGGCCGGGAAGTCCGCCGCCAAGAGCCGCGGTAGAGATCTGCTGGGTTTAGAGG	mm	chr13:8995365	FALSE	1.14426	1.03711	chr13:8995425	chr10:1034314	222	-	ENSMUSG00000021149	0.637681	0.108696	1.88545	1.63648	1.12453	1.13143	2.34022	1.63977	1.99	1.12798	0.36747	0.0562249	0.63253	0.943775	0.739897	0.31382	1	1	FALSE	FALSE	0	1	0	FALSE
mm_Endogenous_chr12:3823565	659	723	402	1957	234	736	1344	745	1428	919	1213574083	AGCTATTTTGGGCATAAACCTTTTATTCTCTCTGCGTTAGGGGCTGTGCCATGGTAACCATTAGCGCAAGCAAAGGAGTCTGTGATTCAGACTCATCCCCTCCCCTGCGGCTGCCATAGTGGCGGGAGGTGTGGCTTG	mm	chr12:3823565	FALSE	2.14529	1.90812	chr12:3823565	chr2:25547957	16406	+	Dnmt3a	0.528986	0.0289855	2.50093	4.13206	1.15631	1.10724	2.77609	1.49544	3.31649	2.0267	0.0140562	0.0060241	0.985944	0.993976	0.130419	0.0847571	1	1	FALSE	FALSE	1	0	0	FALSE
mm_Sliding_topH3K27Ac_slide_40_chr4:97591305	907	1350	1300	1930	619	1194	867	1388	1223	1796	636691472	AGCTCAATAGGGATCTCCAGGCTACACAGGAGACAGTGTGTGTGTTTGGATGCTTTAAGAATTCTTGGATAGGTGCAGCAGACTGCTACTGCTGGCACGGTGGTTCATTGTGCTGGCTGCATAGTGTGCTCGGATTCC	mm	chr4:97591305	FALSE	0.708133	0.836205	chr4:97591345	chr1:61707930	13662	+	ENSMUSG00000028565	0.507246	0.0144928	1.76532	1.54049	0.959863	1.05557	1.44438	1.82815	1.6529	1.00771	0.620482	0.108434	0.379518	0.891566	0.892008	0.395173	1	1	FALSE	FALSE	0	0	0	FALSE
hs_Sliding_topH3K27Ac_slide_20_chr16:9583844	604	1042	400	2294	433	793	1001	798	1120	857	1894853177	AGCTCATACTCCACATTCTACGCTGTTAATCTCTCTGCTTACTGAGAGGCACCGTTTGTCTTGCAGTGACGCACGGTGGGTGGTTACCATGGCATAGGAAAACATTGCCAGCGCTGGCCCTGTCGTCATGGAACCCCT	hs	chr16:9583844	FALSE	1.71339	1.60483	chr16:9583864	chr16:9281175	NA	+	ENSG00000260071	0.528986	0.0434783	1.94787	2.61756	1.33599	1.27182	1.37503	0.804139	2.28271	1.65911	0.0361446	0.0240964	0.963855	0.975904	0.232368	0.171624	1	1	FALSE	FALSE	1	1	0	FALSE
mm_Endogenous_chr11:88816745	125	101	136	312	108	71	102	52	123	116	1433106828	AGCTCCATGATGAAAACCCCGCCGCAACATCAGCAACAGGCAGGAGCCAAAGGCCATCGCGTGACGGCTTGCGCGGGGACTGGGCGGAGTCAGGGGCGGAGCCTAAGTGGGCCCTGACACTCCTAAGGATTCCGCGCT	mm	chr11:88816745	FALSE	1.28986	1.30209	chr11:88816745	chr17:55055427	-11	-	Scpep1	0.637681	0.0797101	0.756967	1.42732	0.883714	0.612277	1.14091	1.09616	1.11853	1.29598	0.162651	0.47992	0.837349	0.52008	0.516062	0.780344	1	1	FALSE	FALSE	0	0	0	TRUE
hs_Sliding_topH3K27Ac_slide_40_chr14:23398715	485	407	303	875	437	574	498	639	495	728	1960031042	AGCTCCCGAACAGGAGGGATGGGGAGTGGCTTTTCCTGCCAATCCGCGGGCTGCACAGTGGCGTACGGCATGGATCCACCAATCTCAGGGTCTGGTTCCTGACGAACTTCAATCTCCCAGAATGCTTAGTCTATCTGA	hs	chr14:23398715	FALSE	1.00346	0.834962	chr14:23398755	chr14:55136340	NA	-	uc001whl.1	0.557971	0.0434783	0.753863	0.989277	1.13839	1.19887	1.09402	0.60356	0.87157	1.16863	0.323293	0.732932	0.676707	0.267068	0.721268	0.913817	1	1	FALSE	FALSE	0	0	0	TRUE
mm_Endogenous_chr11:97627965	7225	9060	9376	12535	3192	6162	4705	6481	6883	3648	2145355381	AGCTCGCACTTCCGGGGTGGTGTCATATGACTGCGTCAGCGTCTCGGCTCGATGACGTTTGGTATGAGCGCTAAGTCTACGTGAACCTAGAGTCGCAAGTACTTTCTACCCTCCGTCAGTTTTGGTGGCCTCTTTTTG	mm	chr11:97627965	FALSE	1.89194	2.31695	chr11:97627965	chr17:36981654	38	-	Cwc25	0.528986	0.0797101	2.29744	1.94023	2.43881	2.42655	2.2312	2.5569	2.39405	2.43268	0.00200803	0.0220884	0.997992	0.977912	0.0259157	0.164489	1	1	FALSE	FALSE	0	0	0	FALSE
mm_Sliding_topH3K27Ac_slide_-60_chr13:51676150	439	399	677	957	273	822	649	811	1027	921	612533452	AGCTGACACAAACATGCACTGAAAAGGAATTTGGAAAACGAGTCATGGTGCATTCATCTCTCCTGCACACGGAGTGCGACTGTAATTATTTCAATGCGGAAATTCCTGCAGACTCCTCCTGCCGGCTTCCTCTCAGCA	mm	chr13:51676150	FALSE	1.03368	1.36932	chr13:51676090	chr9:91833070	13577	-	Shc3	0.478261	0.0362319	1.18301	1.73197	1.28862	1.20272	1.58513	2.15866	1.8719	1.24567	0.200803	0.0682731	0.799197	0.931727	0.572081	0.326892	1	1	FALSE	FALSE	0	0	1	FALSE
hs_Sliding_topH3K27Ac_slide_-100_chr20:45944549	285	192	241	528	269	470	422	459	480	709	644085102	AGCTGAGTCAATTTTTTCTTCTTTAATGATTTAATTCTGACAAGGATGTATTGCCCAGTGCATTTCATCTATAAACTTTGAACAATGACAAACAGCCACTGTCGACTGAACCACTGGTTCACCCTGGATCTGAAAGAC	hs	chr20:45944549	FALSE	0.873108	0.831358	chr20:45944449	NA	NA	-	ENSG00000263770	0.384058	0.00724638	0.577735	0.969779	0.957112	0.884237	1.04437	0.779873	0.912124	0.920675	0.7751	0.690763	0.2249	0.309237	0.931695	0.892506	1	1	FALSE	FALSE	0	0	0	TRUE
mm_Sliding_topH3K27Ac_slide_20_chr2:93963785	225	141	159	539	183	220	339	291	353	417	899434829	AGCTTCAAGATTGCTGCCTGATTGTCACTTTGCGTGGTTAACTGAAGTCCTTTCCAAGCAATGATTCATTCCAGTTAATGGCATGTCTTCTTTAAAAATGCAAACACTATGTAAGAATTAAAAGGCTATCAATCCTCA	mm	chr2:93963785	FALSE	1.19252	1.03952	chr2:93963805	chr11:43757720	-34225	-	ENSMUSG00000027195	0.369565	0.00724638	0.62366	1.45522	0.761724	0.953146	1.21198	0.756319	1.03944	1.11602	0.38755	0.550201	0.61245	0.449799	0.752167	0.817326	1	1	FALSE	FALSE	0	0	1	TRUE
hs_Sliding_topH3K27Ac_slide_20_chr12:52426818	661	484	648	1057	529	495	540	635	532	886	1884936852	AGCTTCGGCTCAATGGTTCATTTGCATGCGCCCGTGCTATTGGTCGGAGGGGCGGCACCGTAGCCAATGGTGTGCAGGGGTGTTGACCGAGCCGCAGCTCTGCGCCGCCGGGTGAGGTAATGGAATCCTGGCTGGACC	hs	chr12:52426818	FALSE	0.89405	0.737345	chr12:52426838	chr15:101076845	NA	+	ENSG00000123358	0.630435	0.0797101	0.740575	0.987212	0.806646	0.978909	1.23171	1.0663	1.14901	0.892777	0.821285	0.445783	0.178715	0.554217	0.950597	0.75425	1	1	FALSE	FALSE	0	0	0	TRUE
mm_Sliding_topH3K27Ac_slide_60_chr4:128411660	1056	1537	1805	3926	1374	2409	2880	3062	3754	3279	1143717082	AGCTTCTGCACACTCTAGCCTGTGATTTGGGGTGAGTCTGCCTCTGTCCTGAGAGACGGCATGAGAGTCAGCTGTACAGTAGTGGCTGCCAGGAGGGAGGGGTTGGTCCTCCAGCCAAGTTGTAGATAGAGACATTCA	mm	chr4:128411660	FALSE	1.28841	1.40587	chr4:128411720	chr1:33808030	6555	+	ENSMUSG00000028796	0.543478	0.00724638	0.905455	1.41174	1.06073	1.27546	0.757601	1.14354	1.1586	1.34714	0.130522	0.439759	0.869478	0.560241	0.465782	0.751902	1	1	FALSE	FALSE	0	0	0	FALSE
mm_Sliding_topH3K27Ac_slide_-20_chr1:23386900	48	33	27	29	60	276	201	294	242	343	1451661854	AGCTTTCACGCATTTCTGAAGTGGTGTGATTTCTCACTCTTACTACAAGTACAGAGATACTTTAACACCCAGCCCTCCGCTGTTTAACAGTCGTTACACTGTCATGTTACATAAGCAAGGAAAAGCTCCAATTCTGGT	mm	chr1:23386900	FALSE	0.859615	0.866391	chr1:23386880	chr6:72001976	-3154	-	Ogfrl1	0.42029	0.0217391	0.445187	0.238802	1.16179	1.17073	0.788594	0.391716	0.590155	1.16626	0.325301	0.901606	0.674699	0.0983936	0.721268	0.960948	1	1	FALSE	FALSE	0	1	0	TRUE
mm_Sliding_topH3K27Ac_slide_-20_chr10:61949690	2100	2415	2927	4268	2045	2188	1727	2060	2894	3290	1929385024	AGGAAGGCCGTTTCGAGGCGGGGCTCCTCCGCCCCGCCTTTCGGTTGAGGGCGTGGTCTGGGTGGGTGACGTCTGGTGGGAGGAGTCAAAGATCTGTCTTCTCAGTCCAGCAACCCTAGAGCTAGTTGTCACGTGACG	mm	chr10:61949690	FALSE	0.770013	1.08018	chr10:61949670	chr10:70883751	97	-	Vps26a	0.615942	0.0724638	0.95588	1.03115	0.960202	0.855212	1.01225	1.24592	1.12908	0.925096	0.767068	0.465863	0.232932	0.534137	0.929525	0.768899	1	1	FALSE	FALSE	0	0	0	TRUE
mm_Sliding_topH3K27Ac_slide_-100_chr17:37095545	136	250	142	498	151	324	326	406	391	491	1762308726	AGGACCCTCAGCTGCTGGGGAACCTCATTAGGTCCGACGTAGGCGGAAAACTGATAGAGTCCCGATCCCAGACGCGGGCTAGAGCGCCCGATCCCAAGGCGTCGGGCAACGAGTGCGCCCGGAGGGCTAGAGCGTCTT	mm	chr17:37095545	FALSE	0.973953	0.977886	chr17:37095445	chr6:30028962	-191	+	Znrd1as	0.637681	0.101449	1.34012	1.62946	0.952741	1.1294	0.887821	0.818598	1.48479	1.04107	0.538153	0.178715	0.461847	0.821285	0.85098	0.501658	1	1	FALSE	FALSE	0	0	0	FALSE
mm_Sliding_topH3K27Ac_slide_-20_chr7:132851375	135	287	240	310	130	158	188	170	192	262	905280288	AGGACTGATGGGGAGTCCCAGCGCTCCGCCGTGACGTCACGCTACCCGAGGGCGGGCTCAATGATCAGAGTTCCTCCTCCATTGGTCCGGAACCCCGTAGTAACCAGGGGAACTGCAAACACTGTCAGGGCCGCTTCC	mm	chr7:132851375	FALSE	1.05259	0.899897	chr7:132851355	chr16:27561403	-54	+	D430042O09Rik	0.623188	0.0724638	1.78697	1.17817	0.870697	0.886237	1.02366	1.60704	1.48257	0.976242	0.682731	0.178715	0.317269	0.821285	0.908104	0.501658	1	1	FALSE	FALSE	0	1	0	FALSE
mm_Sliding_topH3K27Ac_slide_60_chr10:61949690	496	450	474	830	309	1019	921	867	1371	1141	1546466403	AGGAGTCAAAGATCTGTCTTCTCAGTCCAGCAACCCTAGAGCTAGTTGTCACGTGACGAGCCGTGCGCTGTCAAACTCCTCCCTCCGGCACGCCCATTTCCTTTTCCCTAGGGAAACTTGGGGGACTCGAGGGTTTGT	mm	chr10:61949690	FALSE	1.18407	1.47552	chr10:61949750	chr10:70883751	257	-	Vps26a	0.550725	0.0507246	1.17878	1.32712	1.28944	1.03785	1.58229	1.3353	1.4588	1.32979	0.136546	0.186747	0.863454	0.813253	0.474457	0.511246	1	1	FALSE	FALSE	0	0	0	FALSE
hs_Sliding_topH3K27Ac_slide_-40_chr1:225783419	76	62	96	143	79	104	136	142	115	280	1999074150	AGGATCTCTTCATTTGTAGCAGCTGACTATCAGCTGGCATAGGACCCAAATCATGATCCTACTGCTCCAAGTAATTCACATACATCTCCAAGCAACAGCTGTGTAATCTTTATAGTATAGCTAAAAATATAAAGTTCA	hs	chr1:225783419	FALSE	0.712496	0.504351	chr1:225783379	NA	NA	-	ENSG00000154380	0.376812	0	0.635249	0.894335	0.536274	0.69268	0.948309	1.0578	1.00305	0.614477	0.981928	0.60241	0.0180723	0.39759	0.996686	0.85176	1	1	FALSE	FALSE	0	0	0	TRUE
mm_Sliding_topH3K27Ac_slide_20_chr7:4076135	371	319	405	711	247	533	424	522	577	613	1917878178	AGGATGAACCAATAGGGTGGATGCAGAGATCAGATAGGCAAATGAAGAAGCTGGGAGGATGGGTATGTGTGTAGAGGCATGGTGACACCCTCCAGGGTCTGAGACTGGTTGGTATTTCTTCTTCCTTTCCCTTCAGTG	mm	chr7:4076135	FALSE	1.01463	1.15587	chr7:4076155	chr19:54932365	70	+	ENSMUSG00000030428	0.492754	0	1.04538	1.42221	1.25539	1.16309	1.48061	1.42731	1.45396	1.20924	0.242972	0.190763	0.757028	0.809237	0.622015	0.514446	1	1	FALSE	FALSE	0	0	0	FALSE
mm_Sliding_topH3K27Ac_slide_-60_chr3:126960670	209	190	177	684	208	451	534	575	602	684	1364548593	AGGATTGGAAGCTGCCCAGGGGAAGAAATGCTGTTCCACGCTGAACTGCTCCTGTGTACAAAAGACTCTTTTCACCCGGGCTTAGGGAGGTGAAACAATGCCCTCTGCTCTCCTTACTCGCAGCCTCTCGCATTCCAA	mm	chr3:126960670	FALSE	1.14521	1.08077	chr3:126960610	chr4:113942326	31785	-	ENSMUSG00000032826	0.528986	0.0289855	0.739384	1.62474	0.951989	1.14819	0.990482	0.740746	1.18206	1.11299	0.389558	0.411647	0.610442	0.588353	0.752167	0.72732	1	1	FALSE	FALSE	0	0	0	TRUE
mm_Sliding_topH3K27Ac_slide_-80_chr5:66803715	45	99	121	163	48	99	89	88	134	179	1459797679	AGGCAAACTGGGAACACTTTTCTTTACCAGCAATCAAAGAGTGGGAAAGAGCATCTCGGAGAGCTCCACACTCTCAGAGATGCTGGGATGCTGGCAGAAAAGAGGCAGGGGTATTTGCGGATCCCATCTGCCAGGAAT	mm	chr5:66803715	FALSE	0.729355	0.919273	chr5:66803635	chr4:40964252	-39313	-	ENSMUSG00000029207	0.507246	0.0144928	1.66945	1.67779	0.798534	0.671478	0.924134	2.19434	1.67362	0.824314	0.905622	0.10241	0.0943775	0.89759	0.979841	0.385496	1	1	FALSE	FALSE	0	0	0	FALSE
mm_Sliding_topH3K27Ac_slide_20_chr4:48055540	91	136	103	263	122	163	141	210	220	246	1800508640	AGGCAAGAAGTAATACGTGGAAAACTGTCAAGTGCTTCTCTACACACCCACCCACCAGATACCATCGCAGCCGGCTGGGGGAGTCTCCCTCTTCTTGCCTGACAGCTTCACTTTCTTTGAGGTCTGGAACTGGTGATC	mm	chr4:48055540	FALSE	0.840787	1.0982	chr4:48055560	chr9:102581588	-2444	+	ENSMUSG00000028341	0.521739	0.0217391	0.902316	1.06509	0.956674	1.16597	0.735267	0.734914	0.983704	1.06132	0.502008	0.630522	0.497992	0.369478	0.831533	0.872815	1	1	FALSE	FALSE	0	0	0	TRUE
mm_Endogenous_chr1:75476090	626	996	699	750	200	314	302	314	366	273	78839793	AGGCAGACGCCGGGGGCGGAGTCCCCTGTCTCCCCCCTGCGTGGTTGGTGCGTCCCGGATGACGTCAGAAGCAGCCCGCCCCTGCCAGGATGGTGCACCCTGAGTGACGTCAGGAGCAGAGGCCGGAGCTGTCCATCA	mm	chr1:75476090	FALSE	1.62273	1.64631	chr1:75476090	chr2:220408711	-16	+	Tmem198	0.688406	0.0724638	4.03096	1.85277	1.66065	1.57098	3.08537	3.04233	3.06385	1.63452	0.0381526	0.00803213	0.961847	0.991968	0.235996	0.104448	1	1	FALSE	FALSE	0	2	0	FALSE
mm_Sliding_topH3K27Ac_slide_-20_chr9:105545300	10637	8725	11602	13298	1454	10103	5686	11813	7262	2588	1583146392	AGGCAGCGAGGCCACGCTTCCTTCCCTTGTTTCCTAGCAACCGGCTTCCTACTGAACGCTTCCTCAAGCCTCCGTCCGTCACTTCCGATCTCAACAGGAAGTGAGGTCAACCCGGAGGCTTTCCCGGGAGTTCAGCGT	mm	chr9:105545300	FALSE	3.22288	3.44576	chr9:105545280	chr3:130465700	-64	+	Pik3r4	0.586957	0.0724638	4.85714	4.5187	5.63634	6.23445	7.21138	6.94589	7.07863	5.9354	0	0	1	1	0	0	1	1	TRUE	TRUE	0	0	0	FALSE
hs_Sliding_topH3K27Ac_slide_40_chr3:184055300	141	98	73	219	88	134	123	142	187	179	1815729687	AGGCAGGAATGTTCTCCTTATGTGACTAGGCACAGGTTCCAAATGGGGAGGGGACTGGCTCAGCATCCGGAGCCAAAACAGGAATAGAACTGGGAGCTGAGCCTGGAGCGGTTCTGGGCTTTTGGTTCTCTGCATCAA	hs	chr3:184055300	FALSE	1.00798	1.28287	chr3:184055340	chr16:20695045	NA	+	FAM131A	0.536232	0.0144928	0.901411	1.22957	1.08084	1.08352	1.57943	0.722103	1.15077	1.14543	0.34739	0.443775	0.65261	0.556225	0.731201	0.75308	1	1	FALSE	FALSE	0	0	0	TRUE
mm_Sliding_topH3K27Ac_slide_80_chr8:15496355	88	61	67	253	104	292	247	380	377	387	598398245	AGGCAGTTTTCTAGTGGGTTTCCCTACTGTGAAGATTTTCTCCCAAAGTGCTCATAACTCCCACCTTGCCTAGTTCCGCTCGGAAGGTTGTGGGTGTCAGGCGTGGCTTGGAAATGTGTCATTGCTTAGTCGAGTACT	mm	chr8:15496355	FALSE	0.936241	1.19625	chr8:15496435	chr8:2432976	77980	+	ENSMUSG00000077051	0.492754	0.0289855	0.474762	1.20193	1.08939	1.34114	0.83409	0.56079	0.838345	1.21527	0.236948	0.75502	0.763052	0.24498	0.617179	0.918492	1	1	FALSE	FALSE	0	0	1	TRUE
mm_Sliding_topH3K27Ac_slide_-20_chr15:101076845	81	57	142	149	48	80	85	53	116	84	1714988610	AGGCCACCCCCACCCGGGCAATGACGTCTATTTGCATGCACCAGCGCCAAAGGAAGCGTTGGCTCAACGACGATTTGCATGCTCTCACGCTATTGGCTGCGAGGGCGGCGCCGCAGCCAATGGCTGCAGCGGTGTTTA	mm	chr15:101076845	FALSE	1.48437	1.69579	chr15:101076825	chr12:52426818	-20471	+	Nr4a1	0.608696	0.0869565	0.961199	1.53368	1.37506	0.861785	1.66344	2.57517	2.11931	1.59008	0.0461847	0.0421687	0.953815	0.957831	0.270106	0.259436	1	1	FALSE	FALSE	0	1	0	FALSE
mm_Sliding_topH3K27Ac_slide_-40_chr3:79432895	1602	1180	2057	2443	680	2698	1007	2728	1138	1003	1107781508	AGGCCGACAAGCTCTCGCGTGTGCGCATGCGCCCTAGAAGCATAGCGAGGCTGATTTGCTAGGCATTCTGGGAGTTGTAGTGTTTAGCTCCTGGAGCTGTGCGCAGGAGCCTGGTGACGCCTGGCTTGATATCTGATT	mm	chr3:79432895	FALSE	1.47275	1.39327	chr3:79432855	chr4:159593176	-185	+	4930579G24Rik	0.565217	0.057971	1.4046	1.77503	3.88376	3.71489	2.32229	2.6332	2.47775	3.79932	0	0.0140562	1	0.985944	0	0.117695	1	1	TRUE	TRUE	0	0	0	FALSE
hs_Sliding_topH3K27Ac_slide_20_chr2:44001126	403	318	524	479	50	556	202	576	228	150	1404623336	AGGCCGAGAATGAGATGTAAAAGGACTCCTGAAAACTACATTTCCCATGATGCCCGTCTCCCCACGCAACCGCGGCCGCGACGTCGCTCCCATGGCAACCCAGAAGGCCTCACTCCCAGACTCCTTGCGGAGCTCGCC	hs	chr2:44001126	FALSE	1.97543	1.86654	chr2:44001146	chr17:85025780	NA	+	DYNC2LI1	0.601449	0.0797101	5.14798	4.73322	5.35174	5.24486	7.94509	9.12264	8.53386	5.2983	0	0	1	1	0	0	1	1	TRUE	TRUE	1	0	0	FALSE
mm_Endogenous_chr16:98183685	68	151	83	60	562	856	855	989	1104	1314	1657265927	AGGCCGTAGTCCCCGACCGGGCCCGACGTCCTCCTAGGGCGCGGAGCGTGACGGTTACTCACCGCTCTTCAGCCCTGGGGCAGGCGCCAAGCCCCTTTCCGCTCACACTCGGCTCGCGCAACCCGCAGCCTCCACTGC	mm	chr16:98183685	FALSE	0.954493	1.03173	chr16:98183685	chr21:43430367	-101	-	Zbtb21	0.710145	0.115942	0.21748	0.052748	0.940567	1.02802	0.119271	0.128559	0.135114	0.993112	0.654618	0.995984	0.345382	0.00401606	0.900463	0.996855	1	1	FALSE	FALSE	0	0	0	TRUE
mm_Endogenous_chr9:52052335	115	89	124	212	99	175	211	189	200	345	1438211537	AGGCCTATTTTTAGCATGTTCTTTCTTATAAGCGCATCATGAACGTCAGAGAGTCTTAGCAGCCTCACTAATGTGGGAAGTGAACTTGTCAGATATCAGTTCCTCTGCAGGGTCAGGCTTAATTGAAACGCCGAGATG	mm	chr9:52052335	FALSE	0.89715	0.711875	chr9:52052335	chr11:109871007	-46968	+	ENSMUSG00000077796	0.442029	0.0289855	0.72767	1.05801	0.732369	0.748247	1.14505	1.0903	1.11768	0.804513	0.921687	0.47992	0.0783133	0.52008	0.986331	0.780344	1	1	FALSE	FALSE	0	0	0	TRUE
mm_Sliding_topH3K27Ac_slide_-80_chr11:93857260	1215	2367	1754	2488	977	3555	2259	3586	2308	1761	605320637	AGGCGAAGAAAACGCTTGCAGCCTCCTGGGGAAAGTTGTCAGTCTTCAGAGCCCCTCCCTTTCCTCTGGGAACGCCCAGCCAACGCAGCCTCCGGCTGTCACTTCCTCCACCTCTCACCTCTCGGTCCGCGCGCGCGC	mm	chr11:93857260	FALSE	1.88174	1.60942	chr11:93857180	chr17:49198387	-304	+	Spag9	0.637681	0.0797101	1.96103	1.25819	2.91468	2.78134	1.22587	1.56277	1.60961	2.84801	0.00200803	0.116466	0.997992	0.883534	0.0259157	0.401836	1	1	FALSE	FALSE	0	0	0	FALSE
mm_Endogenous_chr11:83116175	824	570	623	1287	217	1658	680	1597	875	507	141839938	AGGCGACAGACACGACCTGGCCGTTTGGTTCTCCCGCGCACCCAGATGACGTCAGGCGGCGAGATTCTCTTACGCCAAAGCTTCCGGCTCACCATCTTTGTCCCTGGCAAATTGGGTTTTGCGCAGTGGCTTAGATCT	mm	chr11:83116175	FALSE	1.96745	2.1193	chr11:83116175	chr17:33914281	-23	+	Ap2b1	0.572464	0.0797101	2.12615	2.93029	4.72159	4.30229	3.7431	2.49912	3.12111	4.51194	0	0.00803213	1	0.991968	0	0.104448	1	1	TRUE	TRUE	0	1	0	FALSE
mm_Sliding_topH3K27Ac_slide_-20_chr17:28044725	279	239	314	270	189	825	397	824	497	350	759340004	AGGCGATGGCAGCACCGCCGGGAGAAGGAGCTGTGGAGCGGAGCTGGAGCTGAGGGCTCGTCGTCGCGCCGCGATGACGTCACGCCCACGGATCCTGGGAGGGGTCACTTCCAGAAGCGCGTTGGTTGCCCAGGGGAT	mm	chr17:28044725	FALSE	1.66389	1.74374	chr17:28044705	chr6:34855860	16	-	Taf11	0.681159	0.108696	1.02357	0.705819	3.40328	3.2156	1.45514	1.4462	1.45067	3.30944	0.00200803	0.190763	0.997992	0.809237	0.0259157	0.514446	1	1	FALSE	FALSE	0	1	0	FALSE
mm_Sliding_topH3K27Ac_slide_60_chr1:154751825	592	822	725	1033	543	541	596	823	847	895	1663859973	AGGCGCTATGACGTATGGGCGATTGCAGCAGTACAATGGCCCCTATCTTCCACCAGCGCCAACGCACCGCCCACTCACGGGAAAGAGAGCCACCTAGTGAGAAACTGTTCACATCTCTGGTGTGTAGCTTTCTACCTC	mm	chr1:154751825	FALSE	0.976844	1.16213	chr1:154751885	chr1:183439472	2169	-	Smg7	0.550725	0.0507246	1.22533	0.939922	0.872741	1.25597	1.0747	1.16224	1.11847	1.06948	0.48996	0.47992	0.51004	0.52008	0.830633	0.780344	1	1	FALSE	FALSE	0	0	0	TRUE
hs_Sliding_topH3K27Ac_slide_-20_chr20:48732577	1362	422	822	1227	392	601	523	718	672	583	1345777976	AGGCGGGACAGCCCGAGGCATGCTGGTTGTTGTAGTCTAGCGTTGGCGCAGTGCCTGATGGGAGTTGTAGTACGTCCCGCGCACACGCTCCCTCGAAGAGTTTCTGCCCCATTCCTGGACGTCACAGCCGGTCCCCAG	hs	chr20:48732577	FALSE	1.31594	1.41545	chr20:48732557	NA	NA	-	UBE2V1	0.623188	0.0797101	0.871377	1.5465	1.48839	1.68213	3.42495	1.82534	2.62515	1.58526	0.0481928	0.0120482	0.951807	0.987952	0.275284	0.106055	1	1	FALSE	FALSE	0	0	0	FALSE
hs_Endogenous_chr14:23398715	129	102	200	333	209	330	230	334	342	379	887384029	AGGCGGGACGAGTCGCCTTAACAACCAGAGCGTCTGCCACAGCTCCCGAACAGGAGGGATGGGGAGTGGCTTTTCCTGCCAATCCGCGGGCTGCACAGTGGCGTACGGCATGGATCCACCAATCTCAGGGTCTGGTTC	hs	chr14:23398715	FALSE	0.890206	1.1081	chr14:23398715	chr14:55136340	NA	-	uc001whl.1	0.615942	0.0652174	0.395033	0.787207	1.25715	1.20368	0.608425	0.832996	0.72071	1.23041	0.216867	0.819277	0.783133	0.180723	0.590878	0.929292	1	1	FALSE	FALSE	1	0	0	TRUE
mm_Sliding_topH3K27Ac_slide_-100_chr11:51076595	233	377	380	568	147	217	142	187	253	1242	1374162149	AGGCGGGCTTCCAGGTTCACCTAAGAACAGAAAGAACCTCAGCCTGACAAGCGGACAGAACCTCGTCCTACCCGCGCCTCCAGCGCTGCGCAGCCGCAGTGTGGCTGATCAAGCCCCGCCGTCCCTGACGTCACAGAC	mm	chr11:51076595	FALSE	0.167714	0.250145	chr11:51076495	chr5:178054192	-220	+	ENSMUSG00000020385	0.630435	0.0797101	2.07589	1.90907	0.252261	0.205647	1.56244	2.25022	1.99248	0.228954	1	0.0562249	0	0.943775	1	0.31382	0	1	FALSE	FALSE	0	1	0	FALSE
mm_Sliding_topH3K27Ac_slide_-40_chr11:74986795	48	131	27	125	148	1245	2346	1192	3022	2034	1775354069	AGGCGGGGGCGGGGCTTCGATCAGGCCGCCCCGCCCTACCCCCACCGCTCCCCACCGCCGGAAATGCCTCCCCGCTGGGACATCTTTGACGTCACAGGACTCTGACGTCACGGTCGCGTGTCTGTCCGCGCGCGCTTG	mm	chr11:74986795	FALSE	1.69192	1.82447	chr11:74986755	chr17:1953759	-174	+	Mir212	0.710145	0.130435	0.716455	0.417291	0.883751	0.800438	0.3197	0.158804	0.566873	1.75819	0.0261044	0.905622	0.973896	0.0943775	0.185541	0.961052	1	1	FALSE	FALSE	0	2	0	FALSE
mm_Sliding_topH3K27Ac_slide_60_chr7:16683580	162	124	186	328	137	203	170	215	237	166	1923702695	AGGCGTCACATGAGCGCCGCGACACTGGTCAGGTGATTAGTGTGACCCAGTTCCGCCGAGGCGTGGCAGAACAAGTCTATAGAGCCTGCTGATTGGTTGGAGGGAGTCAAAGGTCGCGCTTTGGGGGCGGTGGGCTCT	mm	chr7:16683580	FALSE	1.50225	1.75321	chr7:16683640	chr19:48018701	-106	+	ENSMUSG00000006024	0.601449	0.0724638	0.732623	1.18289	1.76563	1.76902	1.16562	1.18182	1.17372	1.76732	0.0261044	0.423695	0.973896	0.576305	0.185541	0.738722	1	1	FALSE	FALSE	0	0	0	FALSE
mm_Sliding_topH3K27Ac_slide_-60_chr14:64987340	82	290	188	308	55	67	184	148	118	190	2017029510	AGGCTAGTGACTGCTTGGGATTCATTACAGCCTCATGACTCAGACCAGTGACTCATCCTTCTGTCAAGAAAGTGTTAACTGGACAAAAAGAATTTGACTCACACAAGTTCTTGGTCTGAGTCATGAAGACAAACCTCA	mm	chr14:64987340	FALSE	1.42058	0.762643	chr14:64987280	chr8:10009864	-48554	-	uc007uig.1	0.427536	0	4.26791	2.76681	0.509134	1.06392	1.46965	2.97546	3.51736	1.09161	0.431727	0.0060241	0.568273	0.993976	0.78627	0.0847571	1	1	FALSE	FALSE	0	0	3	FALSE
hs_Sliding_topH3K27Ac_slide_60_chr5:100239047	273	163	234	648	344	507	756	863	606	777	829425655	AGGCTGAGGGGGCGGAGGCTGCTTGGAGAGTAACGTCCCCGGCTCTGCCTGCTCTGTGCCGGGAGAGGAAGCTCACAGTGCTACGCGCCTGCGAGCTCGCGCACATACACATATACATACATACACACATACATACAT	hs	chr5:100239047	FALSE	1.42726	0.957733	chr5:100239107	chr1:97564240	NA	-	ST8SIA4	0.57971	0.0652174	0.383538	0.930696	0.942103	1.51702	0.78229	0.592129	0.68721	1.22956	0.216867	0.845382	0.783133	0.154618	0.590878	0.944601	1	1	FALSE	FALSE	0	0	0	TRUE
mm_Sliding_topH3K27Ac_slide_-60_chr7:71833430	146	66	97	470	114	273	246	253	413	517	1853210555	AGGCTGTGTTTCCTGTTGATTTATGTGCTGTCACAGAATTAATTGAGTCTGGACACAGGGTCTCATTTTCTTGGACATGTAGCGGGTAATCGTGCTTCCCCTGTAACGTTCAAATAGCTTTCCAGATGGTCTGTTACG	mm	chr7:71833430	FALSE	0.697985	0.980962	chr7:71833370	chr15:29336675	53394	+	ENSMUSG00000030519	0.442029	0.0289855	0.468618	2.03697	0.762401	0.668394	1.26244	0.740672	1.25279	0.839474	0.895582	0.337349	0.104418	0.662651	0.976353	0.660651	1	1	FALSE	FALSE	0	0	0	TRUE
mm_Sliding_topH3K27Ac_slide_-60_chr16:97296955	21029	35673	25337	43678	5088	16179	16566	13733	17627	14970	1798299995	AGGGAATGCCCCAGAGCCAGAGTAGGTATGTGGCCCATCTCTCTCTCCATGGCTATTTGCACGTAAGTGAGATCTGCAGTGAGATATTGTTAGAGTGTTGCTAAGGCAACAGGACTGCAGGAGATGATGAAATAGGAA	mm	chr16:97296955	FALSE	1.6233	1.44594	chr16:97296895	chr21:42102649	-95507	-	Dscam	0.478261	0.00724638	5.67508	4.24138	1.56042	1.25299	4.07413	4.33478	4.95823	1.53462	0.0562249	0.00200803	0.943775	0.997992	0.296043	0.0626689	1	1	FALSE	FALSE	1	1	0	FALSE
mm_Sliding_topH3K27Ac_slide_20_chr10:68676920	71	40	136	212	58	202	161	241	199	158	234594387	AGGGAGAGCCAAGCACAGGGTTCTGAGTTGGCTTTGCACGTCAGCACAAGAGCTGCGCCTTTGGGACTGCCTGTACACATATGCTGGGGCATTGGGGGTGGAGGCATGCATTAAGCTTGATAAGTTACAGAAAGCTGG	mm	chr10:68676920	FALSE	1.49476	1.54664	chr10:68676940	chr10:62702919	849	+	ENSMUSG00000019944	0.536232	0.0144928	0.558228	1.80592	1.84589	2.08335	1.20668	2.04113	1.62391	1.96462	0.0160643	0.114458	0.983936	0.885542	0.137528	0.396103	1	1	FALSE	FALSE	0	0	0	FALSE
hs_Sliding_topH3K27Ac_slide_-40_chr17:33905678	226	118	179	262	66	114	127	126	145	173	1345415094	AGGGAGGTCTCCGCTTTATGACAGAAGCCGCACCCGGAAATGAAACCACCAGGACCTCTGGGATGCCTGGCGGAAGAGAGGCGCTCTAGTTCCGAATGCGGTCCGGAAACCAGAACTAGAGAACTCTATGACCCACCT	hs	chr17:33905678	FALSE	1.07686	1.02924	chr17:33905638	chr11:83112485	NA	-	PEX12	0.565217	0.057971	1.44716	1.96132	0.951415	0.99478	3.37542	2.36085	2.86814	1.05305	0.514056	0.0100402	0.485944	0.98996	0.833611	0.106055	1	1	FALSE	FALSE	0	0	0	FALSE
hs_Sliding_topH3K27Ac_slide_-100_chr3:184055300	1169	1836	1470	3204	928	1712	1590	1618	2122	2085	1503445657	AGGGATAGAGACGGCTGCTCCAGCTAAAGGTCAGTTGTGATGTACATTGCCTGTTGGCACTGTCTAGGGAATGGGCCTCAGCTCCCCGAGTCCCAGAGAGCTTGGCTGAGCCCTGGTGTTCCCACCTCCTCAGAGCCA	hs	chr3:184055300	FALSE	1.11865	1.24978	chr3:184055200	chr16:20695045	NA	+	FAM131A	0.57971	0.0144928	1.60142	1.70583	1.18552	1.05992	1.24174	1.37889	1.65362	1.18421	0.287149	0.108434	0.712851	0.891566	0.676119	0.395173	1	1	FALSE	FALSE	0	0	0	FALSE
hs_Sliding_topH3K27Ac_slide_40_chr11:18656024	338	357	227	327	138	147	122	147	109	173	263352953	AGGGCCGCCACAGCGCTCGCGAGTCCCTGCGTAACTTCCGCTTTTAGGCCGAGACACGTACAAACGTGATACGTGGCTGCTGGCGTCGACCCGAGGGGCAGGGACTAGGCATTTTAGCAACCAAGGGGGTGTGGCTAA	hs	chr11:18656024	FALSE	1.03446	0.773701	chr11:18656064	chr7:54263755	NA	-	SPTY2D1	0.608696	0.0942029	2.09396	1.17074	1.22682	1.16058	2.41435	1.43188	1.92312	1.1937	0.269076	0.064257	0.730924	0.935743	0.651438	0.326851	1	1	FALSE	FALSE	0	0	0	FALSE
hs_Sliding_topH3K27Ac_slide_40_chr2:27712733	286	346	618	661	395	797	671	899	898	678	4962767	AGGGCGGGCCCTTGAGAGGGCTTCATGAATGTTCTCCTTGACCAATCCCGTCGCCGCATGCAAACTCAAGACCAAGCCCCGCCCACAAGCCTTCAGCCAGCCCCAGGTCCTACGTCATAGCGGTCCGTCTCGCTCTTC	hs	chr2:27712733	FALSE	1.45176	1.62645	chr2:27712773	chr5:31593600	NA	-	IFT172	0.608696	0.0652174	0.70902	0.826791	1.69723	1.81106	0.713728	1.36192	1.03782	1.75414	0.0261044	0.554217	0.973896	0.445783	0.185541	0.820032	1	1	FALSE	FALSE	0	1	0	FALSE
mm_Sliding_topH3K27Ac_slide_-60_chr13:69900465	5900	6316	6456	11312	6843	6361	6479	6841	8903	10882	133730773	AGGGCTGACTCCTAGGTGGCCACAGTGGAGCATGTCGTTCATGGCTGCACTGTGGTCTGCGCATCGTTCAGAGCCTCGGCCCATCTGTCTGGCTCCCTTGCCTGGCTCCCACACCTCTTGCAGCCTCCAGTCTGGGCT	mm	chr13:69900465	FALSE	0.873376	1.00466	chr13:69900405	chr5:6430764	21570	-	Ube2ql1	0.623188	0.0289855	0.747094	0.81674	0.843972	0.858644	0.849902	0.821251	0.835577	0.939019	0.748996	0.75502	0.251004	0.24498	0.929525	0.918492	1	1	FALSE	FALSE	0	0	0	TRUE
mm_Sliding_topH3K27Ac_slide_-60_chr12:99801100	259	374	360	815	293	338	421	463	556	613	1190657245	AGGGGATGCTGGCAATCTCTATTAGGCCCGTTATGTTGGACCGACAGCTGTGTGCTTCCAAGAATCATTTGAAGTTAGGAGACTATGGACACGCCATAGCTTTTCATTTATTGATTTGTTCACTCCGTGTGCATAAAT	mm	chr12:99801100	FALSE	1.00745	1.1138	chr12:99801040	chr14:88777291	-11438	-	ENSMUSG00000033854	0.434783	0.0289855	1.0332	1.3743	0.7961	1.03163	0.871356	1.06953	1.20375	1.06062	0.502008	0.38755	0.497992	0.61245	0.831533	0.708068	1	1	FALSE	FALSE	0	0	0	TRUE
hs_Sliding_topH3K27Ac_slide_-60_chr3:64671179	1430	2947	3093	9635	2251	2434	3439	2523	3408	4160	351622094	AGGGGCTGTGGGTGCTTCGGGAAGAATAAAGGCATCACCGGGCACAGTGCCTACGACCCCATTGCGCTTACAGCGCCGTGCGCTGGGAGAGACTGACCCGGGAAAGTTTCTGCGTCACACGCGCGTGGCAGAAACGCA	hs	chr3:64671179	FALSE	1.21266	1.006	chr3:64671119	NA	NA	+	ENSG00000241684	0.615942	0.0942029	1.0597	2.11479	0.84477	0.828374	0.626216	1.19609	1.58725	1.10933	0.39759	0.126506	0.60241	0.873494	0.753687	0.421237	1	1	FALSE	FALSE	0	0	0	FALSE
hs_Sliding_topH3K27Ac_slide_40_chr22:18121403	900	1144	1199	1999	872	1768	1168	1693	1519	2155	574644156	AGGGTTTGGGTCTTCAGGTCACATCTGGACGGAGAGACCTCCGGGGCCTCCGTTGGTCGGTCCTTCCGCTCCGGATACCGTTCCGGATGTCAGGTAGTTCAGGTCCCGCCCCGACGCCGGCCGTGACGAAGGCACGCC	hs	chr22:18121403	FALSE	0.795055	0.865572	chr22:18121443	chr6:120786110	NA	+	ENSG00000099968	0.65942	0.108696	1.06191	1.13263	1.18453	1.07303	1.01739	1.19691	1.10715	1.12878	0.36747	0.483936	0.63253	0.516064	0.739897	0.780344	1	1	FALSE	FALSE	0	0	0	TRUE
hs_Sliding_topH3K27Ac_slide_-40_chr3:13420911	1621	1880	1777	2718	1141	2153	2429	2101	2872	3008	1220092786	AGGTACTGGAGAAGTTTCTGGAGACGAGGAACGACACTCAGCTCCTGCCATCACCTCCCACCGCTGGGAGCCTCTGGGGTGAGTCACCCACAGCCGTGAGCAATTCCACTCAGCAGTGCTATTTCAGTTCTTTCTGAT	hs	chr3:13420911	FALSE	1.18454	1.17246	chr3:13420871	chr6:91026415	NA	-	uc003bxx.3	0.550725	0.0289855	1.33368	1.17694	1.03342	0.954005	1.40043	1.35569	1.37806	1.1785	0.293173	0.236948	0.706827	0.763052	0.680962	0.570503	1	1	FALSE	FALSE	0	0	1	FALSE
mm_Sliding_topH3K27Ac_slide_-80_chr4:129784790	178	79	116	246	95	200	196	219	212	322	1482611199	AGGTCACGAAAAATAAAAACAAACGAGCCACTACGGTCAACAACACTTCCGGACACTCCTACCCAGCCCTCTGTAAGGTACCAGCTCACCGCCTGTGACTTCCGTTTGTTGACCGGAAGATTGACAGCCTGTCCGTCC	mm	chr4:129784790	FALSE	0.892898	0.808487	chr4:129784710	chr1:32110590	-169	+	Pef1	0.521739	0.057971	0.673105	1.27939	0.896779	0.928946	1.84697	1.0629	1.45494	0.912863	0.785141	0.190763	0.214859	0.809237	0.935249	0.514446	1	1	FALSE	FALSE	0	0	0	FALSE
mm_Sliding_topH3K27Ac_slide_-40_chr9:107456980	493	682	850	1397	869	1521	1632	1309	1689	2111	447833003	AGGTCATCCGTCGAGCTGTAGCGTCGTGGCCCCGCCCCTCGACGTCTTCACCCCCTCACCCCCCTCGACACCAGAGCTAAAGTCGGGCTGTCTACGTTTCAGTCCTAACGGTTGCCGCGCGGCGCTGGCCTCCGCGCA	mm	chr9:107456980	FALSE	1.13405	0.982504	chr9:107456940	chr3:50374875	-86	+	ENSMUSG00000010067	0.666667	0.123188	0.635249	0.794269	1.04028	0.846942	0.55923	0.851448	0.714759	1.05828	0.508032	0.821285	0.491968	0.178715	0.831533	0.929292	1	1	FALSE	FALSE	0	0	0	TRUE
hs_Sliding_topH3K27Ac_slide_20_chr14:90810968	45	27	23	102	50	103	149	84	182	164	527776418	AGGTGGCATCGAGGATGGAAATTCACCCCCTTATTTTTCACTATCCTCAAATGTTTAGCTAACGGATTCATCAGAACTAGTGAGAGCATAATGTCTTTCAACATCTCTCAGGAGTATCAAGCAGCTGATTGCAACTTT	hs	chr14:90810968	FALSE	1.33274	1.36276	chr14:90810988	chr12:101405355	NA	-	NRDE2	0.405797	0.0144928	0.437092	1.00791	0.906786	0.699581	0.887168	0.400421	0.722501	1.34775	0.128514	0.819277	0.871486	0.180723	0.465782	0.929292	1	1	FALSE	FALSE	0	0	0	FALSE
mm_Sliding_topH3K27Ac_slide_40_chr2:181336040	91235	64531	97477	74722	26020	69354	42883	86858	43933	32725	1481495267	AGGTGGGCGGGGCTTTCCGTGACCCAGCTCTCTACTTCCGGTGCGCGGGTGACGTAGTGCCTGCATCTCTTACTGCTGCGACACCCGGAGGACTCTGAGTCTTCTGTCGTATACTTGCTCCCCTGCTTTTCTGTGTTT	mm	chr2:181336040	FALSE	1.92224	1.64856	chr2:181336080	chr20:62612464	97	+	Prpf6	0.57971	0.0652174	2.00743	1.41884	3.05987	3.6252	3.45635	3.26102	3.35869	3.34254	0.00200803	0.0060241	0.997992	0.993976	0.0259157	0.0847571	1	1	FALSE	FALSE	0	0	0	FALSE
hs_Endogenous_chr9:122132201	2264	1452	1573	3957	1648	1731	1686	1686	2055	2722	299892575	AGGTGTTTCCACGGCCGCGTGGATCCATCGAGTGTGGGTTTTGTCTCGGGAGTTGCCCGTGTGGGTCCGTTTGTGTCTGCGCGTCTCTCTGTGAGTGTTTGACACTGTTTGTTTCTCTCGGTGTGTAGGCGAGAGCCC	hs	chr9:122132201	FALSE	0.908597	0.927079	chr9:122132201	chr4:68615885	NA	-	ENSG00000078725	0.572464	0.0797101	0.713163	1.18631	0.918164	0.846003	1.3542	0.830865	1.09253	0.917838	0.779116	0.5	0.220884	0.5	0.933906	0.787024	1	1	FALSE	FALSE	0	0	0	TRUE
mm_Sliding_topH3K27Ac_slide_-60_chr16:91263240	511	276	324	799	420	731	669	843	937	1201	1850500611	AGGTTTGGCAGCCCGATGCCCCGCCCCTCTCCATTCTCTCTCTGAACACATCAGCCCGTTTGTTCCCTTGATCCCCCCTCTTCCTGTTGCATTCTGCCTGTTCAATGGGGAAAGAGTGGAACCGGATGGCTGGACCCA	mm	chr16:91263240	FALSE	0.817118	0.958053	chr16:91263180	chr21:34437086	-6893	+	Olig1	0.572464	0.0289855	0.531912	0.939915	0.878791	0.958709	1.19932	0.671514	0.935417	0.91875	0.779116	0.676707	0.220884	0.323293	0.933906	0.885678	1	1	FALSE	FALSE	0	0	0	TRUE
mm_Sliding_topH3K27Ac_slide_80_chr10:89208640	492	522	401	1428	411	388	473	467	432	851	1741817693	AGTAAACTGGCAGTTTGTTACTGCTCTTGGCTTCTCCATATTTGTCTCAAGAAACAGGCTAAATGTAGGACCCTGTTCCAAGTTGGTGACAGAGAATTAAAAGCTCTTGGTTAGGATCTCTTTCTCTCCTCTGTTATT	mm	chr10:89208640	FALSE	0.81533	0.623372	chr10:89208720	chr12:100535606	818	+	ENSMUSG00000019951	0.405797	0	1.02804	1.71663	0.658284	0.749531	1.18001	0.849301	1.37233	0.719351	0.963855	0.238956	0.0361446	0.761044	0.989773	0.570503	1	1	FALSE	FALSE	0	0	0	FALSE
mm_Sliding_topH3K27Ac_slide_-80_chr16:5992280	3746	3697	4455	9898	4225	6915	7581	7887	9234	13410	242421693	AGTAAAGCAAACACCACGGAGCTAGGGAGAACAGATGAAGGCAGAGGCTAAGCTGCACTTAGTTCAGCTCTGAGCTACACTTTGTTCTAGCTGTCCTTCTACCATTTATTATTTACCAACACTTTTCAGCAATAACGT	mm	chr16:5992280	FALSE	0.829277	0.845579	chr16:5992200	chr16:6193204	16441	+	1700123O21Rik	0.427536	0.0144928	0.708276	1.15748	0.744517	0.803314	0.873986	0.917868	0.932876	0.837428	0.895582	0.676707	0.104418	0.323293	0.976353	0.885678	1	1	FALSE	FALSE	0	0	0	TRUE
mm_Sliding_topH3K27Ac_slide_20_chr8:130961210	213	256	112	680	183	360	413	330	445	388	264897028	AGTACAGTGTAATTCAGCAGATGAAGGGCCGAGGCAGGCGCTGCTAATCACGCAGCATAGCACGTACAGCAGTACACACGTACACTTCTATTTTTATGCACATGATTATGCAGATGACATTTGTCTTGATTTTCAGCT	mm	chr8:130961210	FALSE	1.56142	1.40838	chr8:130961230	chr10:33539090	-50762	-	uc009nzu.1	0.442029	0.0362319	1.13232	1.8359	1.33962	1.16167	1.14734	0.532753	1.48411	1.4849	0.0722892	0.178715	0.927711	0.821285	0.349042	0.501658	1	1	FALSE	FALSE	0	0	0	FALSE
mm_Sliding_topH3K27Ac_slide_40_chr13:83705515	120	64	70	399	147	428	425	488	578	519	315588952	AGTACGTCAAGTTTCCACCCCTGCTGGCTCCTCAAACCACTACAAACATCCGCACGTCACTGCAGTGCTGAGTAATGGCAGGATTGGAGCTGGTTGATTTTGCTACAGATTTTTTTTCCACAGGATATTTTCAGCTTC	mm	chr13:83705515	FALSE	1.20122	1.36758	chr13:83705555	chr5:88129340	-7180	+	uc007rih.2	0.463768	0.0217391	0.352405	1.34106	1.19066	1.28427	0.804688	0.414515	0.84673	1.2844	0.170683	0.748996	0.829317	0.251004	0.531719	0.918492	1	1	FALSE	FALSE	0	0	0	TRUE
mm_Sliding_topH3K27Ac_slide_-40_chr16:97296955	2258	2478	1812	4692	584	2426	3494	2625	3911	1465	1251669851	AGTAGGTATGTGGCCCATCTCTCTCTCCATGGCTATTTGCACGTAAGTGAGATCTGCAGTGAGATATTGTTAGAGTGTTGCTAAGGCAACAGGACTGCAGGAGATGATGAAATAGGAACCAGAATCCACACTGCTCCA	mm	chr16:97296955	FALSE	3.49854	3.27826	chr16:97296915	chr21:42102649	-95467	-	Dscam	0.463768	0.00724638	3.43454	3.9695	2.39092	2.44734	3.81131	2.70088	3.70202	3.3884	0	0.00401606	1	0.995984	0	0.0770232	1	1	TRUE	TRUE	1	1	0	FALSE
mm_Sliding_topH3K27Ac_slide_-60_chr3:88307645	5059	4144	4768	12080	2601	3840	5376	5200	6496	6437	424939804	AGTAGGTGCAAAGTGAGGGAGAGGATCAGGCATCCCCAGAGAGCCAAGGAAGTTGGGGGGAGGGCTGAAGCTGCTGCCCATCAGTGACTCACCCCACTTCCACCACTGGCTCCCCTTTCCTCAGTAGTAATAGTGAGT	mm	chr3:88307645	FALSE	1.22512	1.23924	chr3:88307585	chr1:156084066	251	-	Lmna	0.565217	0	1.28961	2.29466	0.861309	1.10337	1.91729	1.59571	1.79213	1.23218	0.214859	0.0763052	0.785141	0.923695	0.588208	0.334554	1	1	FALSE	FALSE	0	0	1	FALSE
hs_Endogenous_chr3:9273037	337	419	360	695	325	698	683	783	645	1108	2093319487	AGTATCAGGATTTGCCTTCTCACAATCCCTTGTCATTCATCTTGCCTCCCTTGGAAACGGCCGTCACCCATTTGGCAGTAATGAGGATGGAAGGATGCGGTTCTGTCTCTTTAGAAAACTGGGCAATTAAATTTTCTT	hs	chr3:9273037	FALSE	0.904238	0.714846	chr3:9273037	chr6:112880270	NA	+	SRGAP3-AS3	0.442029	0.0217391	1.04354	1.05656	0.909551	0.965216	1.02214	0.964225	1.05005	0.937383	0.753012	0.528112	0.246988	0.471888	0.929525	0.796228	1	1	FALSE	FALSE	0	0	0	TRUE
mm_Sliding_topH3K27Ac_slide_-40_chr4:13134245	114	67	68	144	75	178	135	161	121	136	349369518	AGTATGAGATTTCTCATGACTCAGTTTTTCTCTGCCTCCTGCAAACAGTCCGTGCAGCTTGCAGAGAGCTGATGAATAGGCAACGCTGTAAATGCAGAGCCAGCGTGCCGGTGAGACACTCAACAGCGTCTGCGCAGG	mm	chr4:13134245	FALSE	1.45612	1.09254	chr4:13134205	chr8:93706682	-60032	-	ENSMUSG00000080663	0.521739	0.0434783	0.723091	0.94862	1.8897	1.61692	1.49833	0.789236	1.14378	1.75331	0.0261044	0.451807	0.973896	0.548193	0.185541	0.759576	1	1	FALSE	FALSE	0	0	1	FALSE
mm_Sliding_topH3K27Ac_slide_-60_chr1:75260885	1867	1978	2068	2849	1260	1112	1092	1116	1236	1840	1134211829	AGTCAGCCCAGGAGCCTAGGCGGAGTCTGCCACTCCCCACCCACCTCCAAGGCGGGGTCTAGTTGCCCCTCTTGAGGCGACCCGGCCAACTGCAGGCGTGCAATGACGACATCTCCACCCCCGGCTCTTATGCCTATT	mm	chr1:75260885	FALSE	0.870576	0.824885	chr1:75260825	chr2:220174240	-18	-	Ptprn	0.637681	0.0507246	1.27068	1.11715	0.872566	0.828417	1.46062	1.42869	1.44466	0.850491	0.88755	0.194779	0.11245	0.805221	0.976353	0.521996	1	1	FALSE	FALSE	0	1	0	FALSE
mm_Sliding_topH3K27Ac_slide_-20_chr13:51676150	43749	39552	57943	58886	10916	70995	30677	71294	36668	38091	1169009321	AGTCATGGTGCATTCATCTCTCCTGCACACGGAGTGCGACTGTAATTATTTCAATGCGGAAATTCCTGCAGACTCCTCCTGCCGGCTTCCTCTCAGCAAGTCACAATGTGTTTCCATGGCAACCCTGTTGCTAAGGGG	mm	chr13:51676150	FALSE	1.18139	1.18211	chr13:51676130	chr9:91833070	13657	-	Shc3	0.507246	0.0289855	2.93281	2.66526	2.69102	2.55642	3.95065	4.62058	4.28561	2.62372	0.00200803	0.00401606	0.997992	0.995984	0.0259157	0.0770232	1	1	FALSE	FALSE	1	0	0	FALSE
mm_Sliding_topH3K27Ac_slide_80_chr3:117060455	1052	1769	1313	1516	826	1065	1823	2033	1381	2386	233572460	AGTCATTTCTAAGGAGCTGGGTAGTGCTTGCTGCCAACTCCTAAATAGCTGGAAGAATGATGCCTTCTTCCCTCTTCTACAATCTCTTTAGAGGTTCATCGTGCATTCAAGTTTCAGGGAGACAATTTGCCATCCAAT	mm	chr3:117060455	FALSE	1.12077	0.710749	chr3:117060535	chr1:99732428	-3179	-	Lppr4	0.434783	0.00724638	1.73351	0.906797	0.644452	1.16378	1.25545	1.38371	1.32016	0.915761	0.785141	0.277108	0.214859	0.722892	0.935249	0.603625	1	1	FALSE	FALSE	0	0	0	FALSE
hs_Sliding_topH3K27Ac_slide_20_chr17:685586	80	91	100	39	200	2512	1034	3042	1197	546	1479268593	AGTCCACGAAGGGCGCCACGGGCCGTGACGTCACTAGCCGCCGACGGCGCGCTTTCGTGACGCAGCCCGGGTCTCAGGGAACATGGCGGCGCTGGTGAGACCCGCGAGGTTTGTCGTGCGACCGTTGCTGCAGGTGGT	hs	chr17:685586	FALSE	2.77798	2.69212	chr17:685606	chr11:76057240	NA	-	ENSG00000167699	0.688406	0.144928	0.368291	0.0963442	6.6426	7.60972	0.394297	0.43524	0.414769	7.12616	0	0.957831	1	0.0421687	0	0.979808	1	1	TRUE	TRUE	0	1	0	FALSE
hs_Sliding_topH3K27Ac_slide_20_chr2:220408711	29	45	47	39	23	36	65	60	42	98	1507578501	AGTCCCCTGCCTCCCGCGGCGTGGTTGGTGCGTCCCATGTGACGTCAGAAGCAGCCCGCCCCTGCCTGGATGGTGCGCCCTGAGTGACGTCAGGAGCAGAGGCCGGAGCTGTCCATCAGCACCAAAGGCCGCGGGCGG	hs	chr2:220408711	FALSE	0.972947	0.526279	chr2:220408731	chr1:75476090	NA	+	ENSG00000188760	0.695652	0.0869565	1.58367	0.837776	0.530381	0.836234	1.24289	1.77881	1.51085	0.749613	0.953815	0.170683	0.0461847	0.829317	0.989773	0.499534	1	1	FALSE	FALSE	0	2	0	FALSE
mm_Sliding_topH3K27Ac_slide_-80_chr10:31329605	107	182	278	368	283	470	539	617	690	948	1223451076	AGTCCGCAAGCAGTGGCTGGTGTCCCTGGAGGAGAAGCGGGAGACCTCCCTCTCCTCGTGCAGCACCTAGGGCCCTGCTCCCTCCCCTCACCCCACCCCTTTGGCACACACCTCCCCACACGTACACACATACGCGCG	mm	chr10:31329605	FALSE	0.834031	0.893786	chr10:31329525	chr6:125283078	-86	-	Rnf217	0.65942	0.0507246	0.520553	0.64247	0.715815	0.888954	0.372701	0.855101	0.613901	0.863909	0.865462	0.893574	0.134538	0.106426	0.967165	0.960948	1	1	FALSE	FALSE	0	0	0	TRUE
mm_Sliding_topH3K27Ac_slide_-80_chr15:3978085	473	638	508	1178	390	707	834	840	893	1099	584085829	AGTCCTGAACTTAAGAAGAGTGCATCACGCAGGGCATTTACTTGCACTGTGTGCTCTTGAACTCCTTCCCCTGTTGCTCATTTCCTTGCCTTCAATCTCTGAGTGTTGAGAATCTAAAGATGTCATCACAGGACTCCC	mm	chr15:3978085	FALSE	1.11319	0.997807	chr15:3978005	chr5:41869269	519	-	BC037032	0.463768	0.00724638	1.32415	1.49235	0.928823	1.04396	1.19553	1.13386	1.40825	1.0555	0.512048	0.218876	0.487952	0.781124	0.831533	0.551688	1	1	FALSE	FALSE	0	2	0	FALSE
mm_Sliding_topH3K27Ac_slide_-40_chr3:145771170	279	490	336	617	182	238	254	260	291	333	1892340855	AGTCTCCTGTTGAGATTGACAGAACGCCTTCACCAATACCTTATCCGCTCCCCAACATTGTCTCTCATAGAAGGCTAGTGATTGGTTGTTGTGTTGTGACGTCACCTAACGTAATCCCAGAGAAGCCCAGTTTCCCAC	mm	chr3:145771170	FALSE	1.1189	1.0731	chr3:145771130	chr1:85527880	-4	-	ENSMUSG00000043020	0.478261	0.0289855	2.17924	1.67496	1.03192	1.06643	1.51111	1.60704	1.9271	1.096	0.423695	0.064257	0.576305	0.935743	0.781518	0.326851	1	1	FALSE	FALSE	0	2	0	FALSE
hs_Sliding_topH3K27Ac_slide_60_chr9:125027196	2822	3736	3400	5797	1649	2433	2939	2765	2952	4058	267590023	AGTCTTTCCTTAGTAACCTGGGCGATAGCTGGTGAGTGTCCTTGACAGGGCCTCGAGGGGCGCGTGTGGTCTGGGTGCCAGAGACCCTTACTCAGGGACCTCTGGGGGACCTCAGGGGACCAGACTACCGTCCCCGAC	hs	chr9:125027196	FALSE	1.0624	0.8933	chr9:125027256	chr2:35992210	NA	+	ENSG00000148187	0.623188	0.0434783	1.83386	1.7369	0.865648	0.930648	1.68694	1.79481	1.78538	0.977851	0.682731	0.0783133	0.317269	0.921687	0.908104	0.337327	1	1	FALSE	FALSE	0	0	0	FALSE
mm_Sliding_topH3K27Ac_slide_60_chr12:71469945	2114	3017	2953	4479	2184	2437	2308	2644	2852	3382	1260468982	AGTGACGTTTCAACATGCTGGAGATTGGAAGGCAGGGCTCTTGGCTTCGTCTCAGACTCATGCTGCCTCTGCTGCTGAGTGTGGAGATGAATTTATAACACCGAACTCTTCCCTGCTCACACCTCCCGTTTTCCTCAC	mm	chr12:71469945	FALSE	1.00107	1.03554	chr12:71470005	chr14:51607152	21464	-	Trim9	0.514493	0.0289855	1.11816	1.01326	1.04038	1.0678	0.954148	1.17698	1.06571	1.05409	0.512048	0.516064	0.487952	0.483936	0.831533	0.790562	1	1	FALSE	FALSE	0	0	0	TRUE
mm_Sliding_topH3K27Ac_slide_-80_chr12:53390420	1512	1547	986	3237	623	1092	1187	955	1460	1094	1681955252	AGTGCCCCGTAATGCAGAGGCAGTGCTGCGCAGTTTATCCCACTTCATTCCTGTTCCCCTGCTTTTCAGCCTTGTTCTGTTTTCCCCCTTTTGAAGTGCATTAGTTACCATGGAGACAGTGATGTCATTGGAATTCAT	mm	chr12:53390420	FALSE	1.5916	1.63881	chr12:53390340	chr14:32298938	113187	+	ENSMUSG00000035142	0.471014	0.0144928	2.00993	2.56712	1.44117	1.19231	2.39236	1.37768	2.28853	1.61521	0.0401606	0.0220884	0.959839	0.977912	0.24316	0.164489	1	1	FALSE	FALSE	1	1	0	FALSE
hs_Sliding_topH3K27Ac_slide_40_chr16:68057144	417	258	879	612	124	514	159	575	203	137	966002341	AGTGCGGGAGAAGCGCACATCAGTGACGTCACGGACGCGCCGCGACCTCGCGTACGGTGGCTGGCGAGGCTCAGTACGGTGTGTGGAGCTGGAGCACCGTGAGGAAGAAGCGAGGTTCTTTTTAAGAGTTCAGCTGCG	hs	chr16:68057144	FALSE	1.70247	1.81957	chr16:68057184	chr8:108535365	NA	+	ENSG00000167264	0.615942	0.115942	1.68414	2.43849	5.41694	5.73257	3.31496	6.17058	4.74277	5.57476	0	0.00200803	1	0.997992	0	0.0626689	1	1	TRUE	TRUE	0	1	0	FALSE
mm_Sliding_topH3K27Ac_slide_80_chr6:141444305	284	414	391	881	244	366	366	293	378	527	584668175	AGTGCTGAATAATTTGGCTCCCAGCGCTGGCTAGTTTCAGACCACCTGCAGATTCTAATCTACGCAAATTTATTTGGTACAAACTTTCTTCTACGTCACTTGGTTCAGCATAATTCCAGAGAGGTTTATTGCTAATGT	mm	chr6:141444305	FALSE	1.01876	0.880793	chr6:141444385	chr12:20810572	-28441	+	Slco1c1	0.405797	0.0217391	1.37338	1.78393	1.00272	0.75938	1.14734	1.39491	1.57865	0.949777	0.7249	0.130522	0.2751	0.869478	0.918974	0.424903	1	1	FALSE	FALSE	0	1	0	FALSE
mm_Sliding_topH3K27Ac_slide_-40_chr5:71487660	188	126	117	578	301	533	566	652	746	716	1324267469	AGTGGAGCGACGTGGTTGCCTGGAAGAGGTAACGATGTATGGCTCCCACTGGAGGGCGAAGGGGCTAATCACGCCTTTACTTAGTCATCAGCGCATCCACGCAGGACCATGTTAAACGCACGTTACGTGGAATTACAC	mm	chr5:71487660	FALSE	1.15959	1.27944	chr5:71487620	chr4:46392668	492	-	Gabra2	0.536232	0.0724638	0.338831	0.948752	1.07479	1.24376	0.61568	0.33836	0.643791	1.21951	0.230924	0.869478	0.769076	0.130522	0.606086	0.950006	1	1	FALSE	FALSE	0	0	0	TRUE
hs_Sliding_topH3K27Ac_slide_-100_chr3:5068159	279	611	417	686	247	458	345	492	493	512	1130220122	AGTGTCCTGGGGCCTGCACCCTAGAGCCAGTGGCTTCCTGAGTGGGCCGTGCCCCGGGTCACTTCCCGGGGGCGGGTTAGCCTCACTGAGGCGGCCGGGATGCTCTTGGTCTCCTAGACAACAGTGTGTGACCGAGGA	hs	chr3:5068159	FALSE	0.988441	1.18241	chr3:5068059	NA	NA	-	ENSG00000230182	0.65942	0.0507246	2.00228	1.3722	1.29154	1.31249	1.11345	1.4696	1.68724	1.30202	0.15261	0.0943775	0.84739	0.905622	0.498963	0.364452	1	1	FALSE	FALSE	0	0	0	FALSE
mm_Endogenous_chr18:67697035	256	300	302	509	120	408	303	498	535	461	1973313761	AGTGTGAGTTAACATGTAGTCTGCACTATGTATGACACAGCTAGCTTTGGCTCTTTGCTTGACCAGAGATGGTAAGATTGAAAATATTTACATTTGATTTTCTGAAAAGCCAACTTTCAAATTTTAAAATGTAGTTAC	mm	chr18:67697035	FALSE	0.964148	1.4251	chr18:67697035	chr18:12521000	-11792	-	Spire1	0.333333	0	2.02358	2.09569	1.27782	1.47547	2.10292	2.19071	2.14681	1.37665	0.108434	0.0421687	0.891566	0.957831	0.422535	0.259436	1	1	FALSE	FALSE	0	0	0	FALSE
mm_Sliding_topH3K27Ac_slide_40_chr4:97473040	2646	989	1896	4316	2494	8844	6420	8656	9782	10714	63769296	AGTGTGTGTAGCATTTATCAAAACTTTCTGGAGCCCCCTCACCTCATTAGCATGTGAATCTCTATTCAGCAGTTAATGTCCGTTACTGCAAGAGTGCTCAATTCTTGTTTTCAATAAGCCAGTTGTAAAATGTCAGAC	mm	chr4:97473040	FALSE	0.878993	1.12116	chr4:97473080	chr1:61577384	28351	-	ENSMUSG00000048747	0.398551	0.00724638	0.320981	0.85502	1.19181	1.10349	1.04582	0.661761	0.85379	1.14765	0.345382	0.746988	0.654618	0.253012	0.731008	0.918492	1	1	FALSE	FALSE	0	0	0	TRUE
hs_Sliding_topH3K27Ac_slide_40_chr1:61577384	343	199	200	300	191	256	390	420	450	528	1697514882	AGTGTGTGTAGCATTTATCAAAACTTTCTGGAGCCCCTCTCACCTCATTAGCATCTGAATCTCTATTCAGCAGTTAATGTCCGTTACTGCTAGAGTGCTCAATTCTTGTTTTCAATAAGCCAGTTGTAAAATGTCAGA	hs	chr1:61577384	FALSE	1.08351	1.04658	chr1:61577424	chr4:97473040	NA	+	ENSG00000270742	0.391304	0.00724638	0.843333	0.776031	0.700031	1.08647	1.77021	0.911498	1.34085	1.06504	0.497992	0.273092	0.502008	0.726908	0.831533	0.603625	1	1	FALSE	FALSE	0	0	0	FALSE
mm_Sliding_topH3K27Ac_slide_60_chr13:59247450	135	105	235	496	220	322	311	384	438	546	1410895598	AGTGTTCTGTCACCCCTAAAAATACAGAACCCCTTCCTGATCTTCCTCCAGTCTTGTTTTAGGAACCATCAGACCACATCCCACTCCTTCCACTCCGTTCTCTCTTGACAGAATACATCCACACCTCAGATGTGAACG	mm	chr13:59247450	FALSE	0.835544	0.985086	chr13:59247510	chr9:87656116	-36607	-	uc007qul.1	0.471014	0.0144928	0.386319	1.11391	0.85148	0.960596	0.604887	0.929832	0.76736	0.910315	0.789157	0.797189	0.210843	0.202811	0.936135	0.926906	1	1	FALSE	FALSE	0	0	0	TRUE
hs_Sliding_topH3K27Ac_slide_-40_chr4:82391786	589	540	414	1599	537	1211	1195	1214	1349	1431	3111358	AGTTCAGAGACCCTCCCTTCGGCCATTAGACCATCTGAGCTAAATATAGATCTACACACACCAGCAGTTCCTGACCGTCGTCACATGGTGCTGACGAAGGACTCCTTGGAGACGCGTTCGGCCCAAACACATACACAA	hs	chr4:82391786	FALSE	1.22498	1.15762	chr4:82391746	chr5:99680685	NA	-	ENSG00000138670	0.514493	0.0507246	0.813953	1.47118	1.22184	1.15873	1.0812	0.671097	1.14257	1.1913	0.269076	0.455823	0.730924	0.544177	0.651438	0.762593	1	1	FALSE	FALSE	0	0	0	TRUE
mm_Endogenous_chr1:75260885	660	2412	727	3332	604	1184	2297	1338	2440	1643	897320538	AGTTGCCCCTCTTGAGGCGACCCGGCCAACTGCAGGCGTGCAATGACGACATCTCCACCCCCGGCTCTTATGCCTATTTGCGTCATACTGGCGTAAGAGCCCCCTCTTAGCCGGGGACCTACTCAACCTAAGCCTCCT	mm	chr1:75260885	FALSE	2.05081	1.82367	chr1:75260885	chr2:220174240	102	-	Ptprn	0.594203	0.057971	3.23236	2.72558	1.04046	1.1123	1.07714	1.04775	2.97897	1.93724	0.0180723	0.0100402	0.981928	0.98996	0.147019	0.106055	1	1	FALSE	FALSE	0	1	0	FALSE
hs_Sliding_topH3K27Ac_slide_-60_chr7:120590634	165	98	131	234	133	360	299	328	309	437	1412211422	AGTTGTTCCTAGTTGTGTTATGCAGGTGCATACAACTCCCGCCATTCTCTGTGCAAAAATCAACAAATAAACAGAGGCACCGCATTTCGGATTCTGTTACGCACTGTTTGCAATGGCGCCCGGTATTCGTAGTTTCTG	hs	chr7:120590634	FALSE	1.00367	0.8683	chr7:120590574	chr6:21899430	NA	+	ENSG00000071243	0.456522	0.0507246	0.596423	0.869271	1.18941	1.02517	1.22291	0.857391	1.04015	1.10729	0.39759	0.550201	0.60241	0.449799	0.753687	0.817326	1	1	FALSE	FALSE	0	0	0	TRUE
mm_Sliding_topH3K27Ac_slide_-100_chr13:83705515	35	23	52	50	27	300	242	311	267	360	6636858	AGTTTCAACAGCTGTGCTGGGTCTTTAATCATATATTATCTTTATGAAGCCTTTTTCTAACATATGTTAATTGGCTGTTTTCTGTGACAAATTATGAGCTCTTACTTTGATGAGGTTCAATTGCAATCATGTTGGAGT	mm	chr13:83705515	FALSE	0.986086	0.910755	chr13:83705415	chr5:88129340	-7460	+	uc007rih.2	0.333333	0	0.689515	0.91495	1.20318	1.17994	1.27781	1.67648	1.47715	1.19156	0.269076	0.178715	0.730924	0.821285	0.651438	0.501658	1	1	FALSE	FALSE	0	0	0	FALSE
mm_Sliding_topH3K27Ac_slide_80_chr13:51944455	153	247	173	288	160	247	268	268	240	505	167266233	ATAAATAGGAGTGAGCCAGTCTGAGTGGGGTGGGCATCTGCTAGTTCCTATTCTCAGGGCTTCTGCCCACCACATCAGTGAGGGCTGCTGCTCTCCACAATTCCTTTTAAAGTCGGAGGACAAACTCACCAGAGCCAA	mm	chr13:51944455	FALSE	0.778476	0.583597	chr13:51944535	chr9:92222088	2503	+	ENSMUSG00000021453	0.514493	0.00724638	1.24956	0.889331	0.706182	0.724846	0.942616	0.941207	1.06944	0.715514	0.965863	0.516064	0.0341365	0.483936	0.989773	0.790562	1	1	FALSE	FALSE	0	0	0	TRUE
hs_Sliding_topH3K27Ac_slide_80_chr21:40178998	1091	803	999	2505	745	1514	1455	1519	1735	2246	1200659326	ATAAATCTCCACGTTAAGCTTTATTAAAATTCTGAGTAGTAGCGCAGCACAGTAAATGTTAGCACCGACCATCCGCAGGGAAATGCTCAGATACTCATTTCTGGGATTAGTCATTCATCTCTCTAAACTGATCGCTTT	hs	chr21:40178998	FALSE	0.950288	0.948599	chr21:40179078	chr16:95925015	NA	+	ENSG00000157557	0.398551	0.0362319	0.872447	1.66128	0.973257	0.923741	1.44355	1.16726	1.30541	0.949443	0.726908	0.287149	0.273092	0.712851	0.92016	0.612667	1	1	FALSE	FALSE	0	0	1	FALSE
hs_Sliding_topH3K27Ac_slide_-40_chr13:109115896	1164	763	839	2899	785	1460	1424	1585	1439	2234	1843875181	ATAAATGACTATTCATTGAATGAATGCTGTAGCTTATATGTGACTGCTTTCCCTGGCTGACTAATATATCAAGCATGGTACTTGTTTTGTGCTCTGAAAAACTTTCTCCATTACCATAGTAACCTCTTACATGTTGGC	hs	chr13:109115896	FALSE	0.935037	0.790989	chr13:109115856	chr8:10131055	NA	+	ENSG00000232087	0.362319	0	0.786746	1.82461	0.943585	0.969055	1.46166	0.930361	1.30568	0.95632	0.714859	0.287149	0.285141	0.712851	0.912309	0.612667	1	1	FALSE	FALSE	1	0	0	FALSE
mm_Sliding_topH3K27Ac_slide_40_chr7:80782710	92	85	83	209	55	76	79	73	72	118	639400795	ATAAATGTCATTGATGTAAAAAAAACTGCGTTGATGTAGAGGAGTCCACCTCAAAGAAGGATGATTACTTCACAGCGGAAACCCCACTGAAGAACATCACTGTTGCTAAGACAACCGAGAGTGAAGCTGGTTGCCCAC	mm	chr7:80782710	FALSE	0.98208	0.749279	chr7:80782750	chr15:93324286	-8185	-	ENSMUSG00000065729	0.434783	0.0217391	1.25094	1.87748	0.929914	0.844974	1.64888	1.31363	1.56421	0.887444	0.827309	0.134538	0.172691	0.865462	0.953071	0.424903	1	1	FALSE	FALSE	1	1	0	FALSE
mm_Sliding_topH3K27Ac_slide_20_chr13:23713080	43	40	32	57	74	177	221	255	230	458	118621545	ATAAGATTTCTTTCAGGATTGGGTTAGTTTTAGTGTTTCGTCACGAACAGGAACGTAAACGACACTTGAAGGTCTACTGTCTCATTGGCTGTCTTGTCACTTCGCTTTCACCAATCGGGACGTACGAATTAAACTGCA	mm	chr13:23713080	FALSE	0.707829	0.616673	chr13:23713100	chr6:26158244	127	-	Hist1h2be	0.42029	0.057971	0.43753	0.38057	0.557981	0.760461	0.572796	0.376424	0.47461	0.662251	0.96988	0.939759	0.0301205	0.060241	0.989773	0.972624	1	1	FALSE	FALSE	0	1	0	TRUE
mm_Sliding_topH3K27Ac_slide_-60_chr7:71833010	89	40	48	157	67	263	185	213	228	227	1576323540	ATAATTATCTGGTGGCTTCTGTCTAGGGCATTTGGACTGGTTGGATTGTATGAGTGTACTCTGAAGCTATGTCAGTGTGAATCATGTATAGTCAACGCAGCTAAGTCACACTAGAAAGAAACAAAAACGTATTATCTT	mm	chr7:71833010	FALSE	1.19549	1.23339	chr7:71832950	chr15:29336242	52974	+	ENSMUSG00000030519	0.384058	0.0144928	0.483242	1.15775	1.67279	1.28161	1.30942	0.623628	0.966524	1.4772	0.0742972	0.654618	0.925703	0.345382	0.35673	0.880951	1	1	FALSE	FALSE	0	0	0	FALSE
mm_Sliding_topH3K27Ac_slide_-80_chr15:66156245	739	512	434	1500	719	1643	1905	1766	1945	2360	1552629073	ATACAAATGCTTTAATCCTCGCTCGCTCGCCCTGCAGTCTGTGCCCAGCTGCCAGGCTGCTGGAGGGGCTGGAGGCCAACGTGAAGGGGATTCTCTCCCATGCATTATTCACGCCAGTGCTTCCCTTTCTATTTTTAA	mm	chr15:66156245	FALSE	1.18409	1.01205	chr15:66156165	chr8:133528938	38299	-	Kcnq3	0.536232	0.0362319	0.576396	1.03075	1.00516	1.02207	1.01316	0.525436	0.803573	1.09807	0.419679	0.777108	0.580321	0.222892	0.778367	0.921206	1	1	FALSE	FALSE	0	0	0	TRUE
hs_Sliding_topH3K27Ac_slide_80_chr9:102582536	2747	3797	2201	7210	2032	2648	2922	3114	3364	4755	1719077059	ATACAATGTAGCAGCGCCCTCCTTCCTTCCGAGGCTGGATTGGAACCCGCCGCAGTGCAGAGACTCGGTTGCTCTCGGCTGGGTCAACTTTCGGGGCATTCTCCCACGATCCTCTCCGCACCACCGTGTCTGAATTGG	hs	chr9:102582536	FALSE	0.901429	0.868757	chr9:102582616	chr4:48056395	NA	-	LOC101928438	0.594203	0.0724638	1.5125	1.75308	0.804042	0.89448	1.3326	0.942878	1.63279	0.885093	0.837349	0.11245	0.162651	0.88755	0.958967	0.396103	1	1	FALSE	FALSE	0	0	0	FALSE
mm_Sliding_topH3K27Ac_slide_-100_chr5:32000875	225	92	98	359	193	358	373	314	462	637	1689454484	ATACAATTTGGGAGAAAGGGTTGGATCCCTTTAGATTCTCCTCAGAATGGGTGGACATTCTTTGGATCGGAACCAATTCGCTCTCCCCGCCCCTCCCTGATGTTGCCCAGTGGAGAAATTGCTCCCCCACAGTAACTT	mm	chr5:32000875	FALSE	0.858957	0.890626	chr5:32000775	chr2:28114146	252	+	ENSMUSG00000052139	0.5	0.0217391	0.385843	0.919027	0.811437	0.673275	1.14918	0.442006	0.795594	0.874791	0.84739	0.777108	0.15261	0.222892	0.960412	0.921206	1	1	FALSE	FALSE	0	0	0	TRUE
mm_Sliding_topH3K27Ac_slide_40_chr11:105689600	114	72	90	194	130	558	625	624	671	965	240757292	ATACAGAAACTGTTTCTTGGCTCTTCTTGGTGCCTGCAGTTGTTTTACCATATGGCACTGCTCTAATTTTGTCTGTGTTCTTCTCTTGAGACTTTTGTGAATAGATTACATTTTTAGAAAAAGTTTAAAATAACTTTT	mm	chr11:105689600	FALSE	0.950068	0.853863	chr11:105689640	chr17:61372554	-12252	+	uc007lxo.1	0.326087	0	0.4483	0.737309	0.834869	0.883201	0.86442	0.60264	0.73353	0.901965	0.803213	0.815261	0.196787	0.184739	0.939288	0.928905	1	1	FALSE	FALSE	0	0	0	TRUE
mm_Sliding_topH3K27Ac_slide_-20_chr4:133285965	76	156	166	204	124	273	236	286	228	291	588267171	ATACAGCCTCGGGTCACGTGACTCGCCACATGGCCCCGCCAGCACAAACTATTGTCTGGCTGCAGAGCTTCTATACAAAGGCACCAGGCCTCCACTTCCTGTGATTCTAGGGACTGGCAGCAGCTGTTGATCAGTTCC	mm	chr4:133285965	FALSE	1.18965	0.962132	chr4:133285945	chr1:27049870	6131	-	ENSMUSG00000007880	0.557971	0.0289855	1.01832	0.81283	1.35451	1.34238	0.604165	1.16532	0.915573	1.34844	0.126506	0.686747	0.873494	0.313253	0.463991	0.889661	1	1	FALSE	FALSE	0	0	0	FALSE
mm_Sliding_topH3K27Ac_slide_-40_chr15:96471305	52	54	43	128	68	440	506	592	729	656	1323091096	ATACCAGACCCGTGCAGTGGCGGGACTTGCCAGTTTCCTATAGGGTGAGTTATTTGACAATGAGGCCAGCCAGCTCAGGTTTTATTTCCGTTGTCCTTCTGACGTCAGAAAAAGCACGAGTTGCAGCACTGTTTCTTG	mm	chr15:96471305	FALSE	1.13148	1.36464	chr15:96471265	chr12:46660828	-1168	-	Slc38a1	0.492754	0.0362319	0.642783	0.93002	0.968412	1.23259	0.753803	0.550451	0.786401	1.24806	0.196787	0.781124	0.803213	0.218876	0.565331	0.92198	1	1	FALSE	FALSE	0	1	0	TRUE
mm_Sliding_topH3K27Ac_slide_60_chr7:148749030	125	333	319	435	105	195	206	171	273	319	1847339732	ATACGTCTCTCGGACCTGATTCAGGCGGCATGTTGGGCGATGATTAGATCTCACCCACTGCGATTAAAGTGACTCATTCCCCCAGGGAACCGGGAGCAGCCGGGTGTGGATGCTGGAAGCTGCGCCTGCTTCTCCGCT	mm	chr7:148749030	FALSE	0.94728	1.05091	chr7:148749090	chr11:926646	1072	+	Ap2a2	0.57971	0.0652174	2.56705	2.04687	0.882582	0.732163	1.1735	2.6446	2.30696	0.999094	0.640562	0.0220884	0.359438	0.977912	0.898186	0.164489	1	1	FALSE	FALSE	0	0	1	FALSE
mm_Sliding_topH3K27Ac_slide_80_chr17:46297885	585	615	685	658	226	562	413	557	497	462	341745806	ATAGCTGCGGACTCAGTATCCCTTGATGCCCTGCGGCTTTTTCTGACGCGACTAGGAGGACAGGGAAGGCAGGGGCGTGGCCTACAGTGGGCCACACCCCGCTCTCCTCCGGCTGGCCCGACTCGGCGGTGGCAGTAG	mm	chr17:46297885	FALSE	1.31132	1.32101	chr17:46297965	chr6:43597115	65	+	Gtpbp2	0.652174	0.0724638	2.20265	1.4385	1.75633	1.6467	2.55159	2.6384	2.595	1.70152	0.0341365	0.0120482	0.965863	0.987952	0.221115	0.106055	1	1	FALSE	FALSE	0	0	0	FALSE
mm_Sliding_topH3K27Ac_slide_-80_chr15:75525180	371	668	459	868	387	356	350	390	405	454	1695682612	ATAGCTGTTCCCCCGTGCTAGTGAATGATGGAGATCAGACGTCACGGTGGAGGTGGCTCGCTGCCATGCTCTGTGGAGCCTTTGCATAAAGAGAACGTCTAATATGCACTTGTGCCTGGATTCGCTGAAATCACATGG	mm	chr15:75525180	FALSE	1.13087	1.09545	chr15:75525100	chr8:144443814	-9689	+	ENSMUSG00000022580	0.514493	0.0434783	1.39716	1.10815	1.13215	1.17331	0.944988	1.03243	1.25266	1.15273	0.337349	0.337349	0.662651	0.662651	0.72202	0.660651	1	1	FALSE	FALSE	0	1	0	TRUE
hs_Sliding_topH3K27Ac_slide_40_chr8:126231698	183	64	50	161	130	309	315	281	382	488	1487427900	ATAGCTTAAGTGTGATTCACTCTGAGTCATTTACTGCTGCTGCTGCTGCTGCTATACTGCCTAGAGCTTGACATTGAACAAGTTGGCAGCCTGTATTGCTACATTTTTTCTAGGAACTCTGAACACATTTCATTCTTG	hs	chr8:126231698	FALSE	0.946875	0.96125	chr8:126231738	chr15:59312325	NA	+	ENSG00000242170	0.413043	0	0.398489	0.61189	0.914218	0.786482	1.38762	0.3348	0.861211	0.954062	0.714859	0.738956	0.285141	0.261044	0.912309	0.917149	1	1	FALSE	FALSE	0	0	1	TRUE
mm_Sliding_topH3K27Ac_slide_20_chr13:23790405	110	72	54	254	90	176	127	139	214	235	1952193157	ATAGGCCTTCTGCGGACCTGGTTGAAAACTAGAGCGTTAGGCGGGGTTTCCGAATCCGGGTCTTGGAAGGGGGTGGAGAAAAAAGGATGCGTCATTGGAATCTGAATGTTTTCATTGGCTAGCAAGCCCCAGCTATTC	mm	chr13:23790405	FALSE	0.792753	1.11825	chr13:23790425	chr6:26104076	118	-	Hist1h4c	0.507246	0.0434783	0.647544	1.39438	1.08132	0.807885	1.2048	0.522288	1.02096	0.955501	0.714859	0.576305	0.285141	0.423695	0.912309	0.833385	1	1	FALSE	FALSE	0	0	1	TRUE
mm_Sliding_topH3K27Ac_slide_80_chr15:50497670	96	68	94	261	93	178	86	175	172	179	934564456	ATAGGGTAATTTTTCCATCCAGATGCAAGTGCTATCAGAGGCCCTCGTCAGCTAAACTAATTATGATCTTGCAATTGCTGATGCCTGCCCACTCTAACATTCGACATCCTCCATTAATCACCAATACAAGGAAAATGA	mm	chr15:50497670	FALSE	0.70477	1.17996	chr15:50497750	chr8:116432002	-161237	-	ENSMUSG00000038679	0.413043	0.0144928	0.591842	1.38659	1.43575	1.33533	1.01754	0.879841	0.989217	1.38554	0.106426	0.62249	0.893574	0.37751	0.41851	0.86694	1	1	FALSE	FALSE	0	0	0	FALSE
mm_Sliding_topH3K27Ac_slide_-80_chr12:85029790	3374	4827	3648	6923	3319	3754	4055	4175	6110	12189	1547799974	ATAGTCCAGAAGTGAGTGAGTGGCACTCGGGGCTAACTTCTCAGTGTGTCTGTTGGCAGGCGAAGAGTCGTATGGCGCTTGTTCTTTCTTCAGAACTGTCACGATGCATGTGTCTGACGCTTGTAGGCGCCTTTAGTG	mm	chr12:85029790	FALSE	0.488005	0.615554	chr12:85029710	chr14:73603822	118	+	Psen1	0.514493	0.0507246	1.1772	1.03057	0.44467	0.467833	1.00208	0.956768	1.10389	0.55178	0.987952	0.48996	0.0120482	0.51004	0.997247	0.784896	1	1	FALSE	FALSE	0	0	0	TRUE
mm_Endogenous_chr2:3644365	129	56	67	272	110	172	216	160	215	245	380277140	ATAGTCCTTCAGAGTAATTGTCAGACACTTGGTCTGTGCGCTTTTGCTCACGTCATGTGGATCAACATGGCTTTTTAAATGGAGATAAATTGTTTTTTATGTGTGGGTGATTCATTTGATACTTCTCTATAAATTCAT	mm	chr2:3644365	FALSE	1.29327	1.07762	chr2:3644365	chr10:14630004	13616	+	ENSMUSG00000026655	0.355072	0.0144928	0.412074	1.22171	1.01362	0.891982	1.15601	0.530202	0.843105	1.18544	0.285141	0.751004	0.714859	0.248996	0.675095	0.918492	1	1	FALSE	FALSE	0	1	0	TRUE
mm_Sliding_topH3K27Ac_slide_40_chr2:101975135	245	241	239	633	144	148	206	193	191	352	253499356	ATATATTTAGTCTCTCTATTTATTGAAGGCAGAGACAACCGTCATCAATCTTTGCCTTTGGGAGACAGCAGATGGCATTCTTGGCACCAGACCCACTCTCCTAGCTGTGCTCTGCTCAGACTAGTGCTGCCCTGTCTG	mm	chr2:101975135	FALSE	0.858472	0.666321	chr2:101975175	chr11:36031840	-3061	-	ENSMUSG00000048058	0.478261	0.00724638	1.35467	2.17186	0.607058	0.748888	1.67713	1.44476	1.76327	0.762397	0.943775	0.0843373	0.0562249	0.915663	0.989773	0.352047	1	1	FALSE	FALSE	0	0	0	FALSE
mm_Sliding_topH3K27Ac_slide_60_chr18:23602865	211	128	136	546	205	581	699	697	888	874	301354624	ATATCCATCTGTATCATAGGCAGCATATGTTGCCATTTGTCTCACGGTGACAGCTCACTTCATTCATTTTCAGAAAGGAAAGAGATGAAGCCCGTGGGCTTGAATCATTTTGGCTTGCTGGTCTTCTTTATGTAAACA	mm	chr18:23602865	FALSE	1.17319	1.24765	chr18:23602925	chr18:32215804	29070	+	ENSMUSG00000024302	0.413043	0.0144928	0.505401	1.31592	0.959789	1.08924	1.01459	0.57749	0.910661	1.21042	0.242972	0.692771	0.757028	0.307229	0.622015	0.89299	1	1	FALSE	FALSE	0	0	0	TRUE
mm_Sliding_topH3K27Ac_slide_-80_chr12:30324575	54	30	34	141	110	329	260	256	435	411	2009138897	ATATTCTGTTGTAATGTGCCTTCCTGTCTTATTATAGTCTTTATTTTCTGTAAAGGTTCCTTCCTTTCTCTTTTGAGAATCTGGAAGTGGACATACTTTGAATTTCATAGACGTAAGAAATTGAATTATCATCTCACA	mm	chr12:30324575	FALSE	0.927969	1.29969	chr12:30324495	chr2:2179808	-46895	-	C630031E19Rik	0.318841	0.00724638	0.220754	0.633312	1.15575	0.850747	0.48391	0.269058	0.427033	1.11383	0.389558	0.955823	0.610442	0.0441767	0.752167	0.979808	1	1	FALSE	FALSE	0	0	0	TRUE
mm_Sliding_topH3K27Ac_slide_60_chr13:44035440	602	1263	985	1439	433	842	759	835	1101	1146	1920452261	ATCACACTTCTTGTGACTCTGCTTCAGAGTCCAAGCTATTCTGTCCGTTCCATGGTAACGGAGAAGAGGATGCCTGAAGAGCTTCGGACTGTAGGTTCCAAATCTGCGTCAGAACCTAGGCACCCTGTGCCCGGGTCA	mm	chr13:44035440	FALSE	0.971536	1.17977	chr13:44035500	chr6:14291918	67390	+	ENSMUSG00000089107	0.521739	0.0362319	2.36099	1.64197	1.06081	0.995186	1.37048	1.98019	2.00148	1.07565	0.473896	0.0542169	0.526104	0.945783	0.820002	0.305626	1	1	FALSE	FALSE	0	0	0	FALSE
mm_Sliding_topH3K27Ac_slide_80_chr14:68701850	3631	5992	3715	8868	3926	11244	12808	11459	18434	13068	1234862702	ATCACAGTCTGCGTCAGAGTCCCGGCGTATAAATAGAGGTGGCAGGACCGCGCCGAGCCGCACACAGCCATCCATCCTCCCCTTTCCCTCTTCTCCCCCGTTCTTCTCTCTAGGTCCCCCATCTCCGCCCCGGGCCTG	mm	chr14:68701850	FALSE	1.43772	1.73222	chr14:68701930	chr8:24814201	91	+	ENSMUSG00000022055	0.630435	0.0724638	1.23538	1.11601	1.24229	1.19768	0.911674	0.823697	1.17569	1.58497	0.0481928	0.421687	0.951807	0.578313	0.275284	0.738221	1	1	FALSE	FALSE	0	0	0	FALSE
mm_Sliding_topH3K27Ac_slide_40_chr9:77765105	163	136	144	162	59	123	172	132	153	93	650739251	ATCACGAAAGTTCTATCGCCCCAGGATTGGTTCCAAGGCCGCATGACATCATAGCGCTTGATCCTGCCTCCGGGCTCGGATTGGCTGGCCGCGCCATTGTGACGTCACGGTCAGCCCACGCCGGGGTTGAAGCTGCCG	mm	chr9:77765105	FALSE	2.71298	2.02023	chr9:77765145	chr6:53213871	15	+	ENSMUSG00000032349	0.615942	0.0942029	1.86581	1.35661	1.90956	1.93862	2.72332	2.12456	2.42394	2.36661	0.0060241	0.0180723	0.993976	0.981928	0.0728194	0.148072	1	1	FALSE	FALSE	0	2	0	FALSE
mm_Sliding_topH3K27Ac_slide_-80_chr1:44204735	628	595	711	1322	678	894	797	894	984	1496	603744850	ATCACTCGCGACCGGAGGAAGGCTCGGCGCTGGCGTCACCGGTGCTGCTTCTCAGTACTTTTAGGCGTGCCAGTACTGGGGCTGAAACCTTTCTGCTCCTCCCACCACATTTAAATTCCGCTGTTCTTTCGGGAGACC	mm	chr1:44204735	FALSE	0.781499	0.807712	chr1:44204655	chr13:103498394	-178	+	ENSMUSG00000026048	0.572464	0.0724638	0.710341	0.96337	0.862814	0.816222	0.913048	0.912849	0.912948	0.839518	0.895582	0.690763	0.104418	0.309237	0.976353	0.892506	1	1	FALSE	FALSE	0	1	0	TRUE
mm_Sliding_topH3K27Ac_slide_-40_chr13:52962205	236	303	284	586	224	347	365	353	440	654	1717955905	ATCACTGAGCCTCAATCACAGCCTGACAGCTCCAGCAACATCTCACTCGGAGTAATTATAGCAAATGGCGTGCAGGCTTAATGTTCTGCCTTTTTTTATTCTCGAACGTAATCAACAAGATATTAAGATTGCTTCTGC	mm	chr13:52962205	FALSE	0.818685	0.826167	chr13:52962165	chr9:94033744	-52476	-	ENSMUSG00000021460	0.42029	0.0289855	1.0949	1.29253	0.76606	0.737224	1.03855	1.10365	1.19371	0.822426	0.907631	0.399598	0.0923695	0.600402	0.979841	0.71449	1	1	FALSE	FALSE	0	0	0	TRUE
mm_Sliding_topH3K27Ac_slide_-60_chr8:46020580	90	268	144	187	39	58	122	113	52	150	2016923888	ATCACTGCAACGGGGAAGCTGGAGGCAGCCTGGGCGTCCTTAGCTGCAACTGGCTGGGAGGCCGAATGAAGTCGGAGAACCCGGTCAGCTCCGGGGAGTCGGGGGCGAGGCGGGGCTCTGACGTCACCTCCCCTCCCC	mm	chr8:46020580	FALSE	1.19308	0.425701	chr8:46020520	chr4:187647928	-15101	+	Fat1	0.681159	0.0724638	5.56224	2.36902	0.558275	1.02894	2.27479	3.21408	3.96563	0.809392	0.917671	0.00401606	0.0823293	0.995984	0.985721	0.0770232	1	1	FALSE	FALSE	0	1	0	FALSE
mm_Sliding_topH3K27Ac_slide_-60_chr19:53388805	1244	1473	1552	3158	1408	2011	1953	1999	2711	2846	229512366	ATCACTTGATCTCAGTTTCTCCGCCTCCTCCTCCTCCCCCTCCCAGCGCTAGACACATGGTTTCCACATGGAGACAAACTTCTTTCCTCCGACTGGACTTGACCTAGCTGTATCGTCCAGCCAATCGGCAGCATCCGC	mm	chr19:53388805	FALSE	1.00663	1.16973	chr19:53388745	chr10:111971060	3690	+	Mxi1	0.550725	0.0434783	0.846798	1.10816	1.02021	0.959357	0.870926	0.959507	0.977476	1.08818	0.447791	0.638554	0.552209	0.361446	0.80275	0.878268	1	1	FALSE	FALSE	0	0	0	TRUE
mm_Sliding_topH3K27Ac_slide_20_chr7:71833010	25	40	48	74	79	334	243	334	278	425	88689690	ATCATGTATAGTCAACGCAGCTAAGTCACACTAGAAAGAAACAAAAACGTATTATCTTTGTAACACGTGAGGCCACCCTGGAAGATGGAAGTGGTCTTGGCACCAGCCTGGCTGTGTCCATATGCTTTGATTTTACCC	mm	chr7:71833010	FALSE	0.838724	0.803246	chr7:71833030	chr15:29336242	53134	+	ENSMUSG00000030519	0.442029	0.0217391	0.409838	0.462803	1.13467	1.0734	0.311944	0.5289	0.43632	1.10403	0.401606	0.953815	0.598394	0.0461847	0.757536	0.979808	1	1	FALSE	FALSE	0	0	0	TRUE
mm_Sliding_topH3K27Ac_slide_-60_chr13:53075665	120	69	271	540	191	98	130	116	90	203	1638424562	ATCATTGCACACAAATCACACGCGCACATTCTCACATCAGTTCGTCCTCGGTGCCCACGTTTCATCGCTGGCCCATTATGCAATGTAAGAAAGGACACATCCCTCCACCTTCCCGAGGGCTCGTAAAACACGGTGACG	mm	chr13:53075665	FALSE	0.939397	0.544427	chr13:53075605	chr9:94185332	-863	-	Nfil3	0.521739	0.0724638	0.292412	1.39686	0.697014	0.780485	0.619315	1.23508	0.927197	0.741912	0.957831	0.680723	0.0421687	0.319277	0.989773	0.888563	1	1	FALSE	FALSE	0	0	0	TRUE
hs_Sliding_topH3K27Ac_slide_-60_chr21:33031728	29	24	34	69	37	136	133	102	118	161	1892528737	ATCCATCTTGGGGCGTCCCAATTGCTGAGTAACAAATGAGACGCTGTGGCCAAACTCAGTCATAACTAATGACATTTCTAGACAAAGTGACTTCAGATTTTCAAAGCGTACCCTGTTTACATCATTTTGCCAATTTCG	hs	chr21:33031728	FALSE	1.21179	0.900013	chr21:33031668	chr16:90220745	NA	-	ENSG00000234509	0.413043	0.0289855	0.525036	0.921379	1.21962	0.86532	0.772609	0.799901	0.786255	1.0559	0.512048	0.781124	0.487952	0.218876	0.831533	0.92198	1	1	FALSE	FALSE	0	1	0	TRUE
mm_Sliding_topH3K27Ac_slide_-40_chr19:10856250	61	28	61	175	53	262	323	237	413	315	1683618869	ATCCCACTACGGTTATTTTAAAAGAGTGACATAAGTTTTCTGGGTATCAGAATTCTATCCCACTGAGTTTATTTTGAGAGAATGATGTAAGTTTTATTTTTAAAATTTCAGTCTTGAAAATATGACATTGGACACGAA	mm	chr19:10856250	FALSE	1.50416	1.61002	chr19:10856210	chr11:60805495	-11308	-	ENSMUSG00000024670	0.304348	0.0144928	0.427624	1.63137	1.20089	1.02764	1.13453	1.00187	1.0682	1.55709	0.0522088	0.516064	0.947791	0.483936	0.28862	0.790562	1	1	FALSE	FALSE	0	2	0	FALSE
mm_Sliding_topH3K27Ac_slide_-40_chr11:97627965	1314	2148	1620	3865	462	3090	1992	3023	2226	996	146325268	ATCCCTACAGGAACCAGCTGCCCTTTTCCCCGCCCGCTCTAGCTCGCACTTCCGGGGTGGTGTCATATGACTGCGTCAGCGTCTCGGCTCGATGACGTTTGGTATGAGCGCTAAGTCTACGTGAACCTAGAGTCGCAA	mm	chr11:97627965	FALSE	2.93381	2.74447	chr11:97627925	chr17:36981654	-42	-	Cwc25	0.572464	0.0869565	3.76333	4.13332	4.4793	4.14554	2.80361	3.05233	3.94832	4.31242	0	0.00401606	1	0.995984	0	0.0770232	1	1	TRUE	TRUE	0	0	0	FALSE
hs_Endogenous_chr14:102829271	36	85	57	135	189	7128	3971	7748	4691	2230	1341238310	ATCCGTAGAAGGAGACGCGAAGCCCCGCCCACCCCACCGGAAACGCATTTGCGTCACGTCCGCCCCGCCCGCTGCCACTTGTGGCTCTGCCGCTCTAGCCCCCGGCGGAGCCAGCTGCTGCTCTTCGGTGCTGGCCCC	hs	chr14:102829271	FALSE	2.61214	2.58317	chr14:102829271	chr12:112127360	NA	-	CINP	0.702899	0.108696	0.36403	0.352909	4.61503	4.74556	0.18776	0.262526	0.358469	4.68029	0	0.971888	1	0.0281124	0	0.982187	1	1	TRUE	TRUE	0	0	0	FALSE
mm_Sliding_topH3K27Ac_slide_-80_chr8:87185635	199	337	278	313	144	74	91	131	117	97	620483578	ATCGCAGATTTGATTGGTTCAGTTCAGGCTCACCCACAGCAGCCTGTGGGGGCGAGGTGACTCAAGTCACTTCCCAGTCCCTAGGGCGGGTCCACACCCTGGCCTCCTCCCAGGCCCCACACCCACGCAAGGCAACAG	mm	chr8:87185635	FALSE	1.37617	1.48118	chr8:87185555	chr19:13265219	-1276	-	Ier2	0.623188	0.0289855	1.89429	1.07392	1.10147	1.8446	1.36224	1.68051	1.52138	1.47303	0.0763052	0.162651	0.923695	0.837349	0.362318	0.485126	1	1	FALSE	FALSE	0	0	0	FALSE
hs_Endogenous_chr12:31742875	144	138	184	217	155	224	277	307	281	352	372313705	ATCGCCCTTTAGCGGCCCCTTTTAACGGCGTCGTTTGCCCAGCACAGCCCCGCACTGCGCCATCAAATGAGTCAAGCGGAAGGACCGGTACCCCTCCGGGAAAACCAGGCACTAACACACGGTGCACCCAACTGAATT	hs	chr12:31742875	FALSE	1.15435	0.980294	chr12:31742875	chr6:149049100	NA	+	DENND5B-AS1	0.586957	0.0797101	0.720654	0.691702	0.918791	1.19124	0.915787	1.03334	0.974566	1.06732	0.493976	0.64257	0.506024	0.35743	0.831284	0.880951	1	1	FALSE	FALSE	0	0	1	TRUE
mm_Sliding_topH3K27Ac_slide_-80_chr15:103103210	220	128	148	584	327	1180	1191	1134	1308	1673	1845717747	ATCGCTTCCTCCGTTCCCCATGGAAACAACACCGCCCTCAATGATCCTCCCGCCCCTTCAGTGCTGAGGTTTTGGCCTTTCATTGAAAATTCCGGGTGACAATCTAACAGCTGCCTCTTCTGGCTGGACAGTTGGCTT	mm	chr15:103103210	FALSE	1.04428	0.960074	chr15:103103130	chr12:54718806	-291	+	ENSMUSG00000060992	0.528986	0.0362319	0.316841	0.882381	1.01835	0.925805	0.663191	0.393979	0.599611	1.00218	0.634538	0.899598	0.365462	0.100402	0.898186	0.960948	1	1	FALSE	FALSE	0	0	0	TRUE
mm_Endogenous_chr3:104315935	399	290	295	612	361	480	468	502	612	586	653220544	ATCGGAGCCCCGGGATGAGGTTGCGTCGGAAATTGGGTTCTGAGAGAGGCGAGGCCTACGATTGCCCCGCCCCCTAGGAGGCGAGCATTACAGCGGCCCTTTCTCCTTTTCCGAGCTGCTTCTGCAGTTCTGCAGCTA	mm	chr3:104315935	FALSE	1.17152	1.28247	chr3:104315935	chr1:113615683	95	-	ENSMUSG00000032913	0.601449	0.0724638	0.650235	0.837597	1.18265	1.17006	1.0895	0.711335	0.90042	1.22699	0.222892	0.704819	0.777108	0.295181	0.598048	0.901507	1	1	FALSE	FALSE	0	0	0	TRUE
mm_Sliding_topH3K27Ac_slide_-100_chr1:39044485	114	58	96	277	135	157	201	176	238	441	1576187986	ATCGGGTCACTGTCAGGCAATTCTGCTTCCGACAGGCTCCGATTGGCGGCCCGGGAAGTCGCAGAACCTATGCTTACCTCGGGTCAGCCCCAAACAACCAGCCACTTTCCCTAACAAGGTAGCGCCTGGACATGGCCC	mm	chr1:39044485	FALSE	0.668589	0.662722	chr1:39044385	chr2:101179298	-373	+	Pdcl3	0.594203	0.057971	0.347755	1.01376	0.514011	0.5451	0.832405	0.619008	0.725707	0.665655	0.96988	0.817269	0.0301205	0.182731	0.989773	0.929292	1	1	FALSE	FALSE	0	0	0	TRUE
mm_Sliding_topH3K27Ac_slide_40_chr11:97311435	395	483	604	782	368	547	677	765	1093	1152	1574802580	ATCGGGTGGCGGCAGCTGCTGACGCCACCACCGACGCGGCAAGTCCCCTCCACACCCATCCTCCCTCCTCCTACCGCCAGGCAGCCGAAGAGAGCCGGGTGGGGGAGAGGGGAAGCTTCAGGGAGGGCTGGCTAAGGG	mm	chr11:97311435	FALSE	0.862061	1.16509	chr11:97311475	chr17:36621168	42	+	Arhgap23	0.695652	0.0652174	1.06238	1.04991	0.685561	0.907008	1.05807	1.42872	1.24339	1.01358	0.61245	0.353414	0.38755	0.646586	0.888931	0.679703	1	1	FALSE	FALSE	0	1	0	TRUE
mm_Sliding_topH3K27Ac_slide_60_chr18:75714565	83	107	157	304	50	132	67	156	115	200	114277678	ATCTATCTTTAGCAGGGACTTAATGAGGGCAATTTCCTTGCTGAGAGAGAAAGAGAAACCGTGGGCAATGTGAGCGTGGATCTGCCTCACGGTCCCCCCAGCTCCTGACAAGAGGATGGCAGTGACAGTCACTATGGG	mm	chr18:75714565	FALSE	0.491413	0.706091	chr18:75714625	chr18:46246838	33162	-	uc008fqf.1	0.521739	0.0217391	1.73218	3.00396	0.952917	1.06536	1.63633	2.73331	2.36807	1.00914	0.616466	0.0220884	0.383534	0.977912	0.889213	0.164489	1	1	FALSE	FALSE	0	0	0	FALSE
mm_Sliding_topH3K27Ac_slide_60_chr13:104900745	1400	2227	2190	2396	1124	2288	1747	2603	2629	3469	1856924575	ATCTCTTGGAATAAAGGAAGATGCTCTCACTATGGCTCACATTCTGAGTCAGCAGTACGAGATCTCCCTCAACTTAGAAGCGAGGCCTTTCAAGGGTGATTCTCCATATGTCTGCACTCCTATACTTTCTTGTATCTG	mm	chr13:104900745	FALSE	0.738738	0.930634	chr13:104900805	chr5:65017060	957	+	ENSMUSG00000042743	0.442029	0.0144928	1.60374	1.0532	0.952276	1.02488	1.22779	1.69604	1.46192	0.988577	0.660643	0.186747	0.339357	0.813253	0.900463	0.511246	1	1	FALSE	FALSE	0	0	0	FALSE
mm_Sliding_topH3K27Ac_slide_60_chr12:86777785	272	136	160	288	140	232	259	200	307	346	1841790921	ATCTGACATTAGCAGCTGCTGCTGCATGAACAAACGAGATGGTCTCTTTTGGAGATGGGCCGTGACAGAAGATTGCCTTGCCCACACCAATGGGGATAATCTCGCTTGGAAAGTTTTTCCTTATAGGTCAAAACATCC	mm	chr12:86777785	FALSE	1.09806	1.08957	chr12:86777845	chr14:75704882	-36934	+	ENSMUSG00000021250	0.463768	0.0217391	0.786304	1.01638	0.968107	0.789508	1.91516	0.994835	1.455	1.09381	0.425703	0.190763	0.574297	0.809237	0.781518	0.514446	1	1	FALSE	FALSE	0	0	0	FALSE
mm_Sliding_topH3K27Ac_slide_20_chr9:77765105	421	755	516	839	274	301	412	363	415	564	1827354222	ATCTGATTCTGGAATTTACAATCACGAAAGTTCTATCGCCCCAGGATTGGTTCCAAGGCCGCATGACATCATAGCGCTTGATCCTGCCTCCGGGCTCGGATTGGCTGGCCGCGCCATTGTGACGTCACGGTCAGCCCA	mm	chr9:77765105	FALSE	1.07157	0.90357	chr9:77765125	chr6:53213871	-25	+	ENSMUSG00000032349	0.550725	0.0724638	2.23037	1.51287	0.770546	0.879083	1.51459	1.6393	1.87162	0.987569	0.662651	0.0682731	0.337349	0.931727	0.900463	0.326892	1	1	FALSE	FALSE	0	2	0	FALSE
hs_Endogenous_chr6:157101746	120	125	101	307	96	197	241	178	304	231	1061288122	ATCTGCCATCTGATTGGCTCCCCTCTCACCATTGGGCATTTAGCACTGCTGATGTAAATAGAAGTGCTGAGCAGTACAGTCACAAAAATTCTTGCCACAAATAATAACTGAGCTCTATTACAAGCAAATGTAAGGTTC	hs	chr6:157101746	FALSE	1.53041	1.61605	chr6:157101746	chr17:4997505	NA	-	ENSG00000270487	0.413043	0	1.05395	1.58	1.2313	1.05247	1.23218	0.915818	1.31698	1.57323	0.0481928	0.279116	0.951807	0.720884	0.275284	0.603785	1	1	FALSE	FALSE	0	0	0	FALSE
hs_Sliding_topH3K27Ac_slide_20_chr12:8129593	1443	1894	1450	1842	592	1921	1500	1757	1935	1800	1105448551	ATCTGGCTTCTCTTAGCCCATCTATTCTAGCTCTCTCTTTTCCTTCCCCTCATTCTTCCCCAGAGAGAGGTTGCTATGGGAATGGCATCGTCATAGAAAGCCAGCTGGTAGAGAGAAGCAGTGACAGAAGCAGAAACA	hs	chr12:8129593	FALSE	1.22242	1.32008	chr12:8129613	chr6:122719940	NA	+	ENSG00000206636	0.478261	0.00724638	2.58963	1.5373	1.54087	1.33322	2.40275	2.13209	2.26742	1.43704	0.0903614	0.0240964	0.909639	0.975904	0.391775	0.171624	1	1	FALSE	FALSE	1	0	0	FALSE
mm_Sliding_topH3K27Ac_slide_-40_chr13:53077460	1059	789	700	2557	707	1431	1366	1355	1866	1974	2069704809	ATCTGGTGGCATGTTCTTAAGTCAGTCATCGGGTTGGCTATTGTAAAGGAACGTGGCAAACACTCCCCGCGTTTACAGACACGTAAGATTATAGCCGGCCTTGGCAAAGGGAGCCATATTCCTGACAGTGACGCACGC	mm	chr13:53077460	FALSE	1.01509	1.1608	chr13:53077420	chr9:94187338	938	-	ENSMUSG00000056749	0.507246	0.057971	0.903311	1.78691	1.04666	0.93755	1.47652	0.861862	1.34511	1.08795	0.447791	0.269076	0.552209	0.730924	0.80275	0.603625	1	1	FALSE	FALSE	0	0	1	FALSE
mm_Sliding_topH3K27Ac_slide_20_chr15:79178000	104	146	135	93	101	205	119	127	210	155	395329821	ATGAAAGGAATCCTGTGCGTGAGTAATTCCGGGAAGCTCGCCTTACAACTGCGCGCGGCTCCAGCCCCCTTCGCCGCCTGCCCCATAACAAAACTCGGAGCGGCGCTGCGCGGAGCCGGGTTCCTAGTGAACTGCGGT	mm	chr15:79178000	FALSE	1.1262	1.66372	chr15:79178020	chr22:38598026	70	+	ENSMUSG00000042622	0.623188	0.108696	1.17007	0.454939	1.90956	1.11911	1.01502	1.16351	1.08927	1.51434	0.064257	0.502008	0.935743	0.497992	0.327291	0.788017	1	1	FALSE	FALSE	0	0	1	FALSE
mm_Sliding_topH3K27Ac_slide_40_chr8:130961210	476	811	454	1813	432	429	516	497	683	632	2135131435	ATGAAGGGCCGAGGCAGGCGCTGCTAATCACGCAGCATAGCACGTACAGCAGTACACACGTACACTTCTATTTTTATGCACATGATTATGCAGATGACATTTGTCTTGATTTTCAGCTTTATCCCATTTTGCATGAAA	mm	chr8:130961210	FALSE	1.19766	1.32708	chr8:130961250	chr10:33539090	-50722	-	uc009nzu.1	0.427536	0.0362319	1.51956	2.07351	0.980057	1.07409	1.08614	0.914811	1.79653	1.26237	0.192771	0.0742972	0.807229	0.925703	0.56322	0.327844	1	1	FALSE	FALSE	0	0	0	FALSE
mm_Sliding_topH3K27Ac_slide_60_chr6:28655570	64	87	36	200	80	176	228	184	288	221	1221450021	ATGACAGCATTTGCCAGCACGCTTACGCAGTGACTCAGGAGACAGGGTGGCCAGCAGAGCAGCCTATTTGTGGGAGTGGATTTTAAGAAGTGCTAATTCCATGGCAGTTTGGAGATATTAATATCGTGCTGGCAGTAG	mm	chr6:28655570	FALSE	1.51337	1.60027	chr6:28655630	chr7:127526138	-29	+	ENSMUSG00000001424	0.485507	0.0217391	0.880256	1.23518	1.14982	1.13718	0.788594	0.391716	1.05772	1.55682	0.0522088	0.522088	0.947791	0.477912	0.28862	0.79412	1	1	FALSE	FALSE	0	0	1	FALSE
mm_Sliding_topH3K27Ac_slide_40_chr1:39044485	7413	8081	8576	12033	5426	7176	7015	8108	8537	8263	837196710	ATGACGTCACCCTATAGTCCCACCCACCGGAGGCACGGCCTGTCATTCCAACGCTCTCAGCCTTCGCCCGGGTTCCTGAGGACCAGGCGCAGACTCCAGTCTTCACTTCCTCCTTGGCTCCGCCCTTTTCGTGCCTGG	mm	chr1:39044485	FALSE	1.24535	1.2687	chr1:39044525	chr2:101179298	-93	+	Pdcl3	0.623188	0.0652174	1.20549	1.09568	1.25388	1.34023	1.34672	1.37583	1.36127	1.29705	0.160643	0.248996	0.839357	0.751004	0.516062	0.584281	1	1	FALSE	FALSE	0	0	0	FALSE
mm_Endogenous_chr15:101076845	256	526	355	997	198	649	393	555	597	425	462842997	ATGACGTCTATTTGCATGCACCAGCGCCAAAGGAAGCGTTGGCTCAACGACGATTTGCATGCTCTCACGCTATTGGCTGCGAGGGCGGCGCCGCAGCCAATGGCTGCAGCGGTGTTTACAGCGCGGCTTGGGTGATGT	mm	chr15:101076845	FALSE	1.35646	1.72496	chr15:101076845	chr12:52426818	-20431	+	Nr4a1	0.586957	0.0942029	2.15031	2.48783	2.20479	1.78364	1.2745	1.56071	2.31907	1.99421	0.0160643	0.0220884	0.983936	0.977912	0.137528	0.164489	1	1	FALSE	FALSE	0	0	0	FALSE
mm_Sliding_topH3K27Ac_slide_60_chr16:85801100	717	771	743	1016	568	262	346	313	368	430	1165906345	ATGAGATCATCCAGCTCCACGTGGAAGGCATGGGGCAGGGCGGGGAGCCTCAGCCAAGGGGTGGGGCTTGAGGAGTCTCAGTCTGTAAGGCTCAGCTCTCTCATTCAAGGGGTCCCAGGGGGTTCTCTGCTTGATCCA	mm	chr16:85801100	FALSE	1.18035	1.05093	chr16:85801160	chr21:28215402	-506	-	ENSMUSG00000022893	0.601449	0.0144928	1.09872	0.883764	0.879719	0.99421	1.24433	1.13867	1.1915	1.11564	0.389558	0.399598	0.610442	0.600402	0.752167	0.71449	1	1	FALSE	FALSE	0	0	0	TRUE
mm_Sliding_topH3K27Ac_slide_60_chr10:98786170	35	40	36	69	75	102	200	151	186	331	413071700	ATGAGATGCGTAGTTGCTCTCCTCATTTGAATTGAAAATTTGATCCAATTCTGGAGACTTCTCAGTTAGCAGCGACCTTCTGGATTGAGCCGTAAATCTGGAACCGACGGGAACATTATTTGCTTTGGTTTAACAGGG	mm	chr10:98786170	FALSE	0.886347	0.690046	chr10:98786230	chr12:89680406	24769	+	uc007gxl.1	0.427536	0.0362319	0.431696	0.454547	0.444922	0.623091	0.460013	0.417831	0.443122	0.788196	0.933735	0.949799	0.0662651	0.0502008	0.988136	0.978296	1	1	FALSE	FALSE	0	0	0	TRUE
hs_Sliding_topH3K27Ac_slide_80_chr3:9273037	56	41	37	157	66	240	280	292	293	417	1657307281	ATGAGGATGGAAGGATGCGGTTCTGTCTCTTTAGAAAACTGGGCAATTAAATTTTCTTTAATGAAGTTCTTTATTTTCTCCTAGCAATATAATTTCTGTTGTGGATTTGGATAAATGTTTTTTAATTCCTTTAAATAG	hs	chr3:9273037	FALSE	0.984972	0.862828	chr3:9273117	chr6:112880270	NA	+	SRGAP3-AS3	0.297101	0.00724638	0.502828	1.17529	0.830972	0.956421	0.836388	0.487997	0.839061	0.9239	0.769076	0.75502	0.230924	0.24498	0.929989	0.918492	1	1	FALSE	FALSE	0	0	0	TRUE
mm_Sliding_topH3K27Ac_slide_40_chr5:35002830	1074	631	970	1693	407	726	406	694	630	857	576385860	ATGAGTGCGTCAGCTTCCCGTATTTCGCGAGAAGTACACAAGTCCTGGATGACACTAAACAGGCACTACAGTTTACTGGATTAAAGACTACAACTCCCAGGAGGCCACACTTCCTCGACTTCCTGGCGCTGGGCCTTA	mm	chr5:35002830	FALSE	0.69494	0.902719	chr5:35002870	chr4:2965174	113	-	Nop14	0.507246	0.0434783	1.25492	2.0552	1.22311	1.10607	2.6012	2.07461	2.3379	1.16459	0.327309	0.0220884	0.672691	0.977912	0.721268	0.164489	1	1	FALSE	FALSE	0	0	0	FALSE
mm_Sliding_topH3K27Ac_slide_-40_chr15:103103210	187	120	111	434	181	207	286	381	376	441	2120423309	ATGATCCTCCCGCCCCTTCAGTGCTGAGGTTTTGGCCTTTCATTGAAAATTCCGGGTGACAATCTAACAGCTGCCTCTTCTGGCTGGACAGTTGGCTTCCGTGAAGCGAGTGACTACGCTGACTGGTCAAGACGCGAA	mm	chr15:103103210	FALSE	0.951326	1.04699	chr15:103103170	chr12:54718806	-211	+	ENSMUSG00000060992	0.528986	0.0507246	0.536639	1.18468	0.677709	1.18002	1.01842	0.533831	0.860661	0.999157	0.640562	0.738956	0.359438	0.261044	0.898186	0.917149	1	1	FALSE	FALSE	0	0	0	TRUE
hs_Sliding_topH3K27Ac_slide_20_chr9:102583356	63	50	68	112	74	194	187	188	176	249	1780672532	ATGATTTGCAATAGTCAGACCCGCTCAGCTGTTCAACACGTGTGTGTTTGTTTTACACACAGAGTAGTTTCTGCTGCAGCGCGCGTGTGCATGATGGATGTGCACTTCGCTGGGTTATAACGTGTCCAGTTAAGAAAC	hs	chr9:102583356	FALSE	1.10165	0.867973	chr9:102583376	chr4:48057230	NA	+	NR4A3	0.471014	0.0507246	0.546913	0.747786	1.1249	1.03124	0.839213	0.799901	0.819557	1.07807	0.465863	0.771084	0.534137	0.228916	0.808958	0.921206	1	1	FALSE	FALSE	0	0	0	TRUE
hs_Sliding_topH3K27Ac_slide_-40_chr5:124242576	460	464	419	1008	382	487	506	588	592	798	1594330348	ATGATTTGGTTACTGCAGCAGGGCGCGCTGCTCCTTGGCTGTGGTAGCCTTGAGTCAGTGCCAAACAATGAAGCAATGCTATTATTAGCCTTTCCATTCAATGGCGACAAAACAGTCCATGTTTCTATTTTCAGACTG	hs	chr5:124242576	FALSE	0.930142	0.910986	chr5:124242536	chr18:55293815	NA	+	ENSG00000249423	0.456522	0.0217391	0.983183	1.30373	0.881125	1.00641	1.18702	0.954794	1.14346	0.94377	0.740964	0.451807	0.259036	0.548193	0.927499	0.759576	1	1	FALSE	FALSE	0	0	0	TRUE
mm_Sliding_topH3K27Ac_slide_40_chr7:4076135	974	1162	961	2364	815	1190	1522	1470	1280	1960	252886876	ATGCAGAGATCAGATAGGCAAATGAAGAAGCTGGGAGGATGGGTATGTGTGTAGAGGCATGGTGACACCCTCCAGGGTCTGAGACTGGTTGGTATTTCTTCTTCCTTTCCCTTCAGTGCCGGCATTGGCATTGGTTTC	mm	chr7:4076135	FALSE	1.1391	0.801949	chr7:4076175	chr19:54932365	110	+	ENSMUSG00000030428	0.5	0.00724638	1.15406	1.43311	0.876601	1.02439	1.17805	1.02642	1.29359	0.970523	0.690763	0.303213	0.309237	0.696787	0.912309	0.631632	1	1	FALSE	FALSE	0	0	0	TRUE
hs_Sliding_topH3K27Ac_slide_-20_chr9:91833070	1557	726	1078	2113	562	1763	1198	2102	1176	1473	2087989259	ATGCCGCATTCATTTCTTAAACACGCTGAGAACTACTGTAATTATTTCAATGAGAAATTCCTGCGAACTCCTCCTGTCTCCTTATGTCTGCTTCCTCTCAGCGAGTCACAATGTGTTTCCATGGCAACTCTGTTGCTA	hs	chr9:91833070	FALSE	1.19304	0.980387	chr9:91833050	chr13:51676150	NA	-	SHC3	0.427536	0.0289855	1.04563	1.85761	1.72807	1.94909	2.73096	1.66971	2.20034	1.83858	0.0200803	0.0321285	0.97992	0.967871	0.157029	0.21841	1	1	FALSE	FALSE	1	0	0	FALSE
hs_Sliding_topH3K27Ac_slide_-20_chr6:34855860	164	39	78	88	65	86	55	130	111	91	1755416599	ATGCCTGAGGCAGAAGCTCGGAAACCCGAGCTGCACAGGCCAGGATCTTACTTCCTGTCGTCGCGCAGCGATGACATCACCCCTACCGCTCTCCTGAGGGGTCATTTTGAGGCGCGCGTAGAGGACTAGAGGACTCAT	hs	chr6:34855860	FALSE	0.886591	1.49787	chr6:34855840	chr17:28044725	NA	-	ENSG00000064995	0.586957	0.0724638	0.485658	0.668899	1.36448	1.95121	2.4871	1.04458	1.76584	1.65785	0.0381526	0.0843373	0.961847	0.915663	0.235996	0.352047	1	1	FALSE	FALSE	0	1	0	FALSE
mm_Endogenous_chr4:68615885	12402	16204	14904	20572	7236	13284	10631	13631	14352	13902	1826723353	ATGCGGGAGCTTGACGTGACTGCGTGTACATACCTGAGTGGGTTTTGTCTGGGGTGACGCACGTCTGAGTCCCGTTGTGTCTCTGTGTTTCTCTGTGACTACTGGAAATTGTTTTTGTGTGTAGGCGAGAGCCCACTT	mm	chr4:68615885	FALSE	1.12176	1.26773	chr4:68615885	chr9:122132201	454	-	Brinp1	0.514493	0.0507246	1.81261	1.40465	1.37963	1.33922	1.68949	1.79293	1.74121	1.35943	0.124498	0.0863454	0.875502	0.913655	0.463991	0.352047	1	1	FALSE	FALSE	0	0	0	FALSE
mm_Sliding_topH3K27Ac_slide_-60_chr12:40949955	911	1542	1501	1081	1481	590	378	667	712	459	633571379	ATGCGTGGGCGGGCCTCCATCGCTCGCTGGCCAATCGCTGCAGATCTCCCCACCGCGGCGTCCACTGGGGCGGTGCCTGCATTCGGACTCCCATTCCCAGAGCCTCAGTCTGCCCTCGGTGCCTGGGCTGCTATGCCT	mm	chr12:40949955	FALSE	1.20804	1.90485	chr12:40949895	chr7:112090356	-115	+	Gm7008	0.681159	0.0797101	0.84277	0.36063	1.85588	1.98479	0.606355	0.882236	0.744295	1.92034	0.0180723	0.815261	0.981928	0.184739	0.147019	0.928905	1	1	FALSE	FALSE	0	0	0	FALSE
mm_Sliding_topH3K27Ac_slide_80_chr13:12553365	217	504	452	499	222	421	473	530	558	749	1603422358	ATGCTAAAGTGCGTGTCTGGAATAACGGAGTGTGACACAGCTGTCAACTGTCCCTGGGCCTGTCATTCTTGGGGATCCAGGTGATGCTCGCCCTTTCCCTGGCAGGTGAGCCGCCGAGCGGAGAGCCCTCACCGCAGC	mm	chr13:12553365	FALSE	0.926363	0.91484	chr13:12553445	chr1:236687784	211	-	ENSMUSG00000057554	0.601449	0.0507246	1.83763	1.11055	0.811543	0.966488	0.963541	1.77233	1.47409	0.920602	0.7751	0.180723	0.2249	0.819277	0.931695	0.503589	1	1	FALSE	FALSE	0	0	0	FALSE
mm_Sliding_topH3K27Ac_slide_80_chr13:104900745	296	487	363	959	334	516	593	633	627	632	1744377022	ATGCTCTCACTATGGCTCACATTCTGAGTCAGCAGTACGAGATCTCCCTCAACTTAGAAGCGAGGCCTTTCAAGGGTGATTCTCCATATGTCTGCACTCCTATACTTTCTTGTATCTGTATCATATATGCTGTTAAGA	mm	chr13:104900745	FALSE	1.37638	1.21827	chr13:104900825	chr5:65017060	997	+	ENSMUSG00000042743	0.427536	0.0144928	1.18022	1.41861	1.17881	1.36801	0.873592	0.946061	1.29941	1.29733	0.160643	0.291165	0.839357	0.708835	0.516062	0.613609	1	1	FALSE	FALSE	0	0	0	TRUE
mm_Sliding_topH3K27Ac_slide_-100_chr14:30109580	165	242	168	548	188	33	25	33	41	49	474584981	ATGCTTTGATGAGTAATATCTCTTCTCTTCATATTTGTCTAGAACTTTTTTTTTCATTGAATAGGGAGAGTGATGAAAGTGTTTTCCATAATAATAACAATGACACAGGCCTGATGATGAACTACAATTAGCTCCCTG	mm	chr14:30109580	FALSE	0.748421	1.0275	chr14:30109480	chr3:54666042	78556	+	ENSMUSG00000075245	0.333333	0	1.04193	1.44017	0.972365	0.919857	0.865146	0.777876	1.24105	0.946111	0.730924	0.353414	0.269076	0.646586	0.922522	0.679703	1	1	FALSE	FALSE	0	0	1	TRUE
hs_Sliding_topH3K27Ac_slide_60_chr5:124242576	124	58	65	211	95	160	181	119	157	283	2092795221	ATGGCGACAAAACAGTCCATGTTTCTATTTTCAGACTGTTCTCTTCTGGTGCAATAGATTTGCCAGAAACCTAAGCCTCAGGGCTAGCACTGGACCAACAGGGCAAAGTAGGCACCTGAAGCCAAAACATGCACAGTG	hs	chr5:124242576	FALSE	0.938197	0.681249	chr5:124242636	chr18:55293815	NA	+	ENSG00000249423	0.471014	0.00724638	0.494179	1.09736	0.816291	0.574332	1.28665	0.595592	0.941123	0.809723	0.917671	0.670683	0.0823293	0.329317	0.985721	0.885559	1	1	FALSE	FALSE	0	0	0	TRUE
mm_Sliding_topH3K27Ac_slide_-20_chr13:69900465	4816	4888	5459	10982	7607	8712	8788	8493	9196	12871	1409876928	ATGGCTGCACTGTGGTCTGCGCATCGTTCAGAGCCTCGGCCCATCTGTCTGGCTCCCTTGCCTGGCTCCCACACCTCTTGCAGCCTCCAGTCTGGGCTCCTCTCCAAGGCAGTGCTTAGGCAATGATGAGCTAGCTTG	mm	chr13:69900465	FALSE	1.00157	0.877363	chr13:69900445	chr5:6430764	21650	-	Ube2ql1	0.601449	0.0217391	0.520113	0.713279	0.977275	0.901262	0.624075	0.624682	0.624378	0.939465	0.748996	0.88755	0.251004	0.11245	0.929525	0.960948	1	1	FALSE	FALSE	0	0	0	TRUE
mm_Sliding_topH3K27Ac_slide_40_chr3:89518945	437	407	631	798	145	502	275	484	379	314	212692010	ATGGGCCTCCCTCCCACGCCGGCGCGCCAGTGATGTCACCAATCTGCGCCCTAACCATTGATTCCTGACTGAAGGTGGAAGACTACGCGTTGGGACTAGCCGGGAAGGGCGCAGCCTTGGGCTCACGAGTGGGCAGCG	mm	chr3:89518945	FALSE	1.28471	1.48218	chr3:89518985	chr1:154600477	82	+	Adar	0.637681	0.0797101	2.27199	2.71911	2.30826	2.10532	2.97082	3.78809	3.37946	2.20679	0.0100402	0.0060241	0.98996	0.993976	0.106382	0.0847571	1	1	FALSE	FALSE	0	1	0	FALSE
mm_Sliding_topH3K27Ac_slide_40_chr12:35182840	210	223	277	453	252	282	383	420	466	543	939022856	ATGGTCTTGATTACCTTGGAGACTTACATCCTGCCTTCTGTGTATATGTGGTTGTTAGTCACTTCTACCAAGTTGTCTCACCACCACTTCTCAAGAACTATAACACAAGATACAATGTTTCAATAACTGATTTTTTTT	mm	chr12:35182840	FALSE	1.03467	1.05385	chr12:35182880	chr7:18561684	-30290	-	uc007nja.1	0.362319	0	0.716282	0.888155	0.749826	1.05646	0.821452	0.956838	0.889145	1.04426	0.532129	0.720884	0.467871	0.279116	0.847309	0.909709	1	1	FALSE	FALSE	0	0	0	TRUE
mm_Sliding_topH3K27Ac_slide_80_chr9:29024360	75	79	133	254	68	192	117	160	176	176	2084008816	ATGTACTGCTAGATGACAAAGAAGGGCAGGGGAGAGTAGTTCTGCTCTCTTTTAGAACAACCAGGGCTACAAACATGAAAGGGATCTTGTGACCTTTTGTTGTGCTGTGTAGTAGCTATTTATAATCTGAGTCATCTG	mm	chr9:29024360	FALSE	0.975158	1.22798	chr9:29024440	chr11:131982088	31270	-	ENSMUSG00000059974	0.42029	0	0.940368	1.84551	1.57507	1.24168	1.08722	1.70256	1.39489	1.40838	0.0943775	0.2249	0.905622	0.7751	0.391775	0.55386	1	1	FALSE	FALSE	0	0	1	FALSE
mm_Sliding_topH3K27Ac_slide_60_chr11:83112485	676	733	856	992	394	691	592	608	640	927	235406686	ATGTAGCCCTGAGCCGGAACTCGGGAACTCTATGACCAACTGGGACTTCCGTTTCCGCCCCCCTGACGACGAGGCGACGGGTTAGTGCAGTGAGTGCATTCTGTTCCTGGTTAGCTCTGAGCGAAGCTTCCTGGAGGG	mm	chr11:83112485	FALSE	0.936793	0.847799	chr11:83112545	chr17:33905678	126	-	Pex12	0.586957	0.0652174	1.50587	1.24396	1.07624	0.895831	1.69127	1.8912	1.79124	0.986036	0.662651	0.0783133	0.337349	0.921687	0.900463	0.337327	1	1	FALSE	FALSE	0	0	0	FALSE
mm_Sliding_topH3K27Ac_slide_-60_chr16:21846060	245	196	238	714	311	1097	1084	1140	1240	1437	900054136	ATGTCTGATTGGCGGGCTCTGTTTATTCTGTGACCAGATTCTTTCTAAAAGAGGGCTGGCCATACCTGCCTGAAGCCTATTGGCTGGGCATTCTCTGGGCCCTCCCTCTCCCTCCCCCCAACCTTTTCCTTCACAGCA	mm	chr16:21846060	FALSE	1.10656	1.05964	chr16:21846000	chr3:185080927	91	-	ENSMUSG00000092078	0.536232	0.00724638	0.510123	1.1343	1.1022	1.08355	0.77655	0.666156	0.822213	1.09288	0.427711	0.769076	0.572289	0.230924	0.782693	0.921206	1	1	FALSE	FALSE	0	0	0	TRUE
hs_Sliding_topH3K27Ac_slide_-40_chr1:230300977	75	48	37	151	116	612	586	685	606	680	1168498604	ATGTGAAAGTCTGAGAAGGAGAGCCAACACTCATCATTCTCCACTCTTAACACAATCATTTTTATTCCAGTGCCTTTCATTCCAGGCTAATCCATATGGATACAGATTTTTATATAGTTGTTTCATTGTGTACATAAA	hs	chr1:230300977	FALSE	1.26413	1.09435	chr1:230300937	chr8:126813830	NA	+	ENSG00000143641	0.347826	0	0.334937	0.643147	1.29943	1.37589	0.637334	0.277653	0.489042	1.33766	0.134538	0.937751	0.865462	0.062249	0.474457	0.972624	1	1	FALSE	FALSE	0	0	0	FALSE
hs_Sliding_topH3K27Ac_slide_80_chr9:137097900	74	88	72	173	33	214	328	238	460	138	1648240414	ATGTGACTTTATCCCACTCAAGAATTAGAGCCTCCCAAACGTTGTCGGGGTTGCTAGGCAACCCCCCGAGATGACATCACTCACACAAGCCACGCTGCGGCGATGTCATCTCTACATATTTATAGCGCCTCTGCAGAG	hs	chr9:137097900	FALSE	3.48656	4.09328	chr9:137097980	chr2:27428700	NA	+	ENSG00000273473	0.514493	0.0507246	2.15848	2.59014	2.23896	2.35559	2.21045	1.89923	2.37431	3.78992	0	0.0220884	1	0.977912	0	0.164489	1	1	TRUE	TRUE	0	2	1	FALSE
mm_Sliding_topH3K27Ac_slide_-80_chr7:52781640	162	137	194	468	168	369	241	416	314	340	2065895426	ATGTTTCACAGGCTGTAGCAAAGGCTGTCCCGGCCGGCAAAGGGATGCGGGGTCGCGCGGGATATCGCATGTAATCTTCCACAAACTCAGAGCTGACTCAATCTGCGCCAACATCGTCCACGCGGCTTTTATACCCTG	mm	chr7:52781640	FALSE	1.03978	1.13408	chr7:52781560	chr19:49375636	-158	-	Ppp1r15a	0.557971	0.0797101	0.660071	1.37635	1.56696	1.67116	0.950537	1.0052	1.01821	1.61906	0.0401606	0.580321	0.959839	0.419679	0.24316	0.836459	1	1	FALSE	FALSE	0	0	0	FALSE
mm_Sliding_topH3K27Ac_slide_-60_chr5:72378455	115	75	83	207	144	90	102	134	127	123	2100969853	ATTACTAACAGACACCTGCTGATCTCACATCTCCATCCCCGCTCCATTCTCACTGGAAGGAATCTCTTTTCTCCTGTGATGCCAATTCATGATAAATGCTCACAAAGGCATGACAATTTCAGTTGCCAGACCATCTGG	mm	chr5:72378455	FALSE	1.21646	1.26792	chr5:72378395	chr4:47280792	-46392	-	ENSMUSG00000080736	0.449275	0.00724638	0.421578	0.71023	1.05645	1.488	0.787225	0.501735	0.64448	1.27222	0.180723	0.869478	0.819277	0.130522	0.544707	0.950006	1	1	FALSE	FALSE	0	0	0	TRUE
hs_Sliding_topH3K27Ac_slide_-100_chr15:29336675	220	117	159	418	175	245	169	254	255	300	1479435011	ATTAGAATGTTTCAGGAGGCGAGTGGTGAGCACGGTGTCGGGGGCCGCATTAGCTATTGATTTATGTGCTGTTATAGAATTAATTGAGTCTGGACATGGAGACTCATTTTCTTGGACATGTAGCAGGTAATCATGCTT	hs	chr15:29336675	FALSE	0.826356	1.04379	chr15:29336575	chr7:71833430	NA	+	ENSG00000034053	0.434783	0.0289855	0.541162	1.18013	1.17911	1.15642	1.23922	0.790894	1.01506	1.16777	0.323293	0.584337	0.676707	0.415663	0.721268	0.836975	1	1	FALSE	FALSE	0	0	0	TRUE
mm_Sliding_topH3K27Ac_slide_-80_chr7:4076135	195	429	237	576	148	86	194	195	171	167	211484481	ATTAGCATCACAATGACGTCTCTCCAGCAGGGGGAGTGAGGTCTTCAGGTTACCTTGGCAACTGGTGGAGGCAAACCTCGTGCTGTTCTTTTTCCCACGGAGGATGAACCAATAGGGTGGATGCAGAGATCAGATAGG	mm	chr7:4076135	FALSE	1.70407	1.2574	chr7:4076055	chr19:54932365	-130	+	ENSMUSG00000030428	0.514493	0.0217391	2.34625	1.92288	0.743521	1.59485	1.29878	1.39395	2.13457	1.48073	0.0722892	0.0421687	0.927711	0.957831	0.349042	0.259436	1	1	FALSE	FALSE	1	1	0	FALSE
hs_Endogenous_chr7:127581814	78	58	45	164	72	175	216	259	278	210	2073719705	ATTAGCATTTGCATTTTAAATTACAAGCTAGAGCAGACGACATTTATGCTATATTTGTACCATTGCCTTCTTCATGAATGATGTCGTATGTGCAGGGAATGCAGAAATAACTCTTCTAAGGCCCTGATGTATTTTAGT	hs	chr7:127581814	FALSE	1.50882	1.62562	chr7:127581814	chr6:28704050	NA	+	ENSG00000197157	0.355072	0.0144928	0.652041	1.12539	1.20318	1.68455	1.06789	0.54405	0.888715	1.56722	0.0502008	0.720884	0.949799	0.279116	0.280227	0.909709	1	1	FALSE	FALSE	0	0	0	FALSE
mm_Sliding_topH3K27Ac_slide_20_chr10:126859330	238	174	173	432	86	171	258	285	314	269	1078940794	ATTAGCTTTTCAGGAAACCCCTGTGGTGGACAGCCCTCCTCAGCCGTTGCTGGGAGACTGCTCTGACGTCACTGTCTGCAGCCAGAGCAGGAATAGCCTGTGAGAGGAAGAACTGCTGGGAAATTAAAAGATGACAGT	mm	chr10:126859330	FALSE	1.40692	1.43341	chr10:126859350	chr12:57734070	1083	+	ENSMUSG00000025404	0.521739	0.0144928	1.63769	2.48186	0.917815	1.44709	2.72799	1.75108	2.23953	1.42016	0.0943775	0.0261044	0.905622	0.973896	0.391775	0.183265	1	1	FALSE	FALSE	0	1	0	FALSE
mm_Sliding_topH3K27Ac_slide_-60_chr12:101405355	409	654	567	834	224	464	643	567	658	687	501794630	ATTATTGATGCTGACGTCATCGGACCTTCATCACGCAGCTTGAGTGGCTTGGGCCGGAAGAACCAGATCTTTCCTTGGTAGATTAAAAGGCGGCATGGAAGATGGAAGCCTGCCCGGTGCTTGTTCACAAGCCTCAGA	mm	chr12:101405355	FALSE	1.37295	1.17615	chr12:101405295	chr14:90810968	7372	-	Nrde2	0.514493	0.0434783	2.36325	1.83954	0.975152	1.12727	1.79986	2.2034	2.10139	1.27455	0.176707	0.0421687	0.823293	0.957831	0.540191	0.259436	1	1	FALSE	FALSE	0	1	0	FALSE
mm_Sliding_topH3K27Ac_slide_60_chr15:59312325	303	520	408	738	290	511	545	547	655	752	1865421601	ATTCACTCTGAGTCACTGCTGGTGCTGAGCTGCCTGGTGCTTGACATTGAACAAGTTGGCAGCCTGCATTGCTACATTTTTTCTAGGAACTCTGAACACATTTCATTCTTGTGAATTTGCTTGTGCAATGATATTAAA	mm	chr15:59312325	FALSE	1.06312	1.06959	chr15:59312385	chr8:126231698	106693	+	Nsmce2	0.413043	0	1.45139	1.25733	0.981102	0.993509	1.02993	1.22468	1.35436	1.06635	0.497992	0.261044	0.502008	0.738956	0.831533	0.602666	1	1	FALSE	FALSE	0	0	1	FALSE
mm_Sliding_topH3K27Ac_slide_40_chr2:118488960	163	132	111	377	98	573	1084	678	1069	517	1121027797	ATTCAGTGGGTTTTTTTGTGTCAATGACATCACCCTCCTCCCCATGGCAACCCCCGACGATATCAAAATTGCCAGGCAACGTTGGAGCTGCTCGCGCCCTACAGGAGCAGGTCGCTGCCTGAGATTCTAATGGAGAAA	mm	chr2:118488960	FALSE	3.07568	2.5391	chr2:118489000	chr15:40531222	2	+	ENSMUSG00000074923	0.521739	0.0434783	1.09025	1.90067	1.6002	1.79119	1.63955	0.985953	1.49546	2.80739	0.00200803	0.176707	0.997992	0.823293	0.0259157	0.501658	1	1	FALSE	FALSE	0	1	0	FALSE
mm_Sliding_topH3K27Ac_slide_-80_chr5:137506075	1664	1499	1981	2351	897	2036	1682	1932	1918	2329	325377453	ATTCATTCATTTCCCGGAGCTCGGCTAGCGCACGCCCCTCTAGCCGAGGGCCCTACTGCGCAGGTGCAGGCCGGGAGCGACGCTTATCCTCCAATCATTGGACTTTCACCGTCCACCAGACACCCGCCCGCTTCCCCA	mm	chr5:137506075	FALSE	1.0594	1.01128	chr5:137505995	chr7:100808940	-214	+	uc009abl.1	0.630435	0.0869565	1.35266	1.29495	1.26217	1.13303	1.82862	1.92243	1.87553	1.1976	0.263052	0.0682731	0.736948	0.931727	0.651438	0.326892	1	1	FALSE	FALSE	0	0	0	FALSE
mm_Endogenous_chr5:144861165	1097	1105	1174	1554	574	511	385	556	491	596	871192541	ATTCCTCTGTCTGCAGGGGGCGCACCGATCGCCACCTTGCCGCCTATGGCTGAGAGGGTGGGGCTCCCGGAGTCAGTATGGATTGACGATTGGCTGGTCCAGGTGTCGGTCCCGGCATCCCGCCTCAGCTCTACGTCA	mm	chr5:144861165	FALSE	0.947581	1.01164	chr5:144861165	chr7:97736110	-139	+	Lmtk2	0.637681	0.0724638	1.55822	1.33761	1.2379	1.27418	1.8839	1.78039	1.83215	1.25604	0.192771	0.0722892	0.807229	0.927711	0.56322	0.327844	1	1	FALSE	FALSE	0	0	0	FALSE
mm_Sliding_topH3K27Ac_slide_20_chr12:40949955	3262	3525	3541	5613	2202	2654	2584	2488	2767	3922	1418381249	ATTCGGACTCCCATTCCCAGAGCCTCAGTCTGCCCTCGGTGCCTGGGCTGCTATGCCTTAGGGCCGCGTGGAGCTTTGGGAGATGTAGTTAGCGAGAGGGCGCGGCCTTCTCCGGGCTCCTCCCAGTCCGATTGCGTC	mm	chr12:40949955	FALSE	0.966466	0.866352	chr12:40949975	chr7:112090356	45	+	Gm7008	0.637681	0.0724638	1.29575	1.25942	0.977023	0.866453	1.46026	1.39981	1.43003	0.921738	0.773092	0.200803	0.226908	0.799197	0.931695	0.52343	1	1	FALSE	FALSE	0	0	0	FALSE
hs_Sliding_topH3K27Ac_slide_40_chr4:13853090	91	134	86	257	160	204	298	341	339	455	1929308129	ATTCTTTTTGCTTAACCAATTTCACAGGCCCCGCACAAAGCACTGCCTTCATTTGGCTTCCTATAATTGCTTATCATTAGGCCCAGCCGCCCCACGAAGTACCTTTTAATTTATTTAAGTCTCATCTCTGATGGATGG	hs	chr4:13853090	FALSE	0.960742	0.914916	chr4:13853130	chr5:42458975	NA	+	ENSG00000250634	0.427536	0.0217391	0.677898	0.793605	0.647336	1.02364	0.560641	0.467883	0.735751	0.937829	0.751004	0.815261	0.248996	0.184739	0.929525	0.928905	1	1	FALSE	FALSE	0	0	0	TRUE
hs_Sliding_topH3K27Ac_slide_-60_chr13:109115896	605	890	730	2250	467	691	850	804	573	1097	800963171	ATTGCTAACATGCATGCTGTATAAATGACTATTCATTGAATGAATGCTGTAGCTTATATGTGACTGCTTTCCCTGGCTGACTAATATATCAAGCATGGTACTTGTTTTGTGCTCTGAAAAACTTTCTCCATTACCATA	hs	chr13:109115896	FALSE	1.13662	0.641418	chr13:109115836	chr8:10131055	NA	+	ENSG00000232087	0.355072	0	1.5426	2.38044	0.909458	1.00104	1.27703	1.36071	1.96152	0.95525	0.714859	0.060241	0.285141	0.939759	0.912309	0.31382	1	1	FALSE	FALSE	0	0	0	FALSE
hs_Sliding_topH3K27Ac_slide_80_chr3:129158957	975	403	478	1520	450	617	517	669	656	786	538878454	ATTGCTTTTGCTGCTTTTCTGGCTTTCCCTTTCGGACATGCGCGCTCGGAGCAAGGCGCCCTCGCACTCAGCTTACCGCGCATGTACGTTGCCAGGGGTAACGCAGGTAGCCAAAGTGGCTTGTGGAGTGGCGACCGT	hs	chr3:129158957	FALSE	0.964872	1.02488	chr3:129159037	chr6:115803490	NA	+	ENSG00000163913	0.586957	0.0869565	0.72489	1.66887	1.13338	1.16253	2.13578	0.924644	1.53021	1.14796	0.345382	0.160643	0.654618	0.839357	0.731008	0.480807	1	1	FALSE	FALSE	0	0	0	FALSE
mm_Sliding_topH3K27Ac_slide_-60_chr9:105545300	722	685	917	1362	315	632	451	751	534	630	1276469064	ATTGGTCACAGAGTTAGTGAAGAAAAGCACCTCCTGCTTGAGGCAGCGAGGCCACGCTTCCTTCCCTTGTTTCCTAGCAACCGGCTTCCTACTGAACGCTTCCTCAAGCCTCCGTCCGTCACTTCCGATCTCAACAGG	mm	chr9:105545300	FALSE	1.05012	1.04086	chr9:105545240	chr3:130465700	-144	+	Pik3r4	0.543478	0.0507246	1.76019	2.13628	1.4484	1.62818	2.25938	2.53407	2.39673	1.53829	0.0562249	0.0220884	0.943775	0.977912	0.296043	0.164489	1	1	FALSE	FALSE	0	0	0	FALSE
mm_Sliding_topH3K27Ac_slide_60_chr7:132851375	92	104	65	83	61	197	140	135	195	188	198332931	ATTGGTCCGGAACCCCGTAGTAACCAGGGGAACTGCAAACACTGTCAGGGCCGCTTCCGGTTCGGGAGGCCGGAACCGCCGCCTCTAGGGATGGACGGTTAGTGTCCGTGGGCCCCGCCGGGAGGTTGGGCGGCCGTC	mm	chr7:132851375	FALSE	1.09238	1.27371	chr7:132851435	chr16:27561403	106	+	D430042O09Rik	0.673913	0.101449	1.38001	0.672263	1.51293	0.980795	1.48669	0.927561	1.20713	1.24686	0.200803	0.38755	0.799197	0.61245	0.572081	0.708068	1	1	FALSE	FALSE	0	0	0	TRUE
mm_Sliding_topH3K27Ac_slide_40_chr3:145771170	1081	1004	902	1841	623	1110	1007	1066	1464	1875	803995901	ATTGGTTGTTGTGTTGTGACGTCACCTAACGTAATCCCAGAGAAGCCCAGTTTCCCACTAGCAAGGAAAGCACTAGTTCTCTGTTCGATTTAGGTCTCTGTTCTTTGCAGTGGCCCCTCTTGACTTAGGTCCATGCCT	mm	chr3:145771170	FALSE	0.787825	0.95881	chr3:145771210	chr1:85527880	156	-	ENSMUSG00000043020	0.478261	0.0217391	1.30444	1.46001	0.854738	0.77653	1.71041	1.26031	1.48536	0.873318	0.851406	0.178715	0.148594	0.821285	0.962739	0.501658	1	1	FALSE	FALSE	0	2	0	FALSE
mm_Endogenous_chr6:92890970	74	430	129	631	91	131	167	93	188	187	1168954368	ATTGTGCGTAAGGCGCGGTGCAGTGAGCTGGGAGAGCCAGCCGCGGGAAAGTTTCTGCGTCATACGCGCGTGGTAGAAACGCACGTCGCTTGGGAAAGTGAAGGACCACCCTAGTTGGGTCCAGAATTGTACATGACT	mm	chr6:92890970	FALSE	1.31002	1.23455	chr6:92890970	chr3:64671180	395	+	9530026P05Rik	0.565217	0.0869565	3.82478	3.42593	1.01144	0.679272	0.801593	1.23398	3.62536	1.27228	0.180723	0.0060241	0.819277	0.993976	0.544707	0.0847571	1	1	FALSE	FALSE	0	0	0	FALSE
mm_Endogenous_chr7:28337965	391	236	413	215	388	808	668	684	984	916	2052055270	ATTTAAGAGAAGGGATGAGGGCACCTAAGTGGGCCAAGGACGATATAGAAGAGATGCATTATAGACGAGAGGGTGACACAGGGAGGGCAGCCAAGGTGTCGCGCACCAGATCGCACAGTACCTGCACGTCAGAGTCTT	mm	chr7:28337965	FALSE	1.06975	1.31914	chr7:28337965	chr19:40854806	-70	-	ENSMUSG00000003363	0.528986	0.0434783	0.492334	0.273778	1.27358	1.01991	0.993364	0.926568	0.959966	1.19445	0.269076	0.654618	0.730924	0.345382	0.651438	0.880951	1	1	FALSE	FALSE	0	0	0	TRUE
mm_Sliding_topH3K27Ac_slide_40_chr5:126064405	300	241	330	560	189	347	314	423	369	406	191294176	ATTTATGATCTCTGAGTCACTCCCGTCTCCATGGTGATGGGTGCGCTGAAGGCAGAGGGAGGGAGTGAGTCCCTGCATTAGTAAATGACCCAGCGACAGGAGAAAGCCCTCAAACACATTAAGGATTAATTGAGCACC	mm	chr5:126064405	FALSE	1.1345	1.11607	chr5:126064445	chr12:125757218	-38345	+	uc008zrt.2	0.5	0.0217391	1.03213	1.46392	1.234	1.42304	1.56467	1.51989	1.54228	1.32852	0.136546	0.146586	0.863454	0.853414	0.474457	0.452546	1	1	FALSE	FALSE	0	0	1	FALSE
hs_Sliding_topH3K27Ac_slide_-40_chr9:94033744	248	180	196	467	181	337	384	335	402	444	1632884062	ATTTCAATCAAAGCTTGACAGCTACCAGTTATATTTCACACAGAGTAATTATAGCAAATGGCATTCAGGCTTAATGTTCTGCCATTTCTTTTTTTTCTGAAATGTAATCAACAAGATATTAAGACTGCTTCTGCTTAG	hs	chr9:94033744	FALSE	1.26867	1.11182	chr9:94033704	chr13:52962205	NA	-	ENSG00000148090	0.326087	0	0.804959	1.27476	1.09587	1.03054	1.35063	0.94262	1.14663	1.19025	0.271084	0.447791	0.728916	0.552209	0.655375	0.754672	1	1	FALSE	FALSE	0	0	0	TRUE
mm_Sliding_topH3K27Ac_slide_40_chr6:47543865	128	74	83	251	88	210	251	231	211	322	673791976	ATTTCGATCATCTAGTCTTTAACAACCTACCCCTGGAGATTTGGGGAATAATCACTGAGTAAATGACAGTTGATTTCGTTAGCACCTGTCACCATTCTCAAAAGCACACAAGTTGGCCAAAACAGATTTTGTTTTTCT	mm	chr6:47543865	FALSE	1.14346	0.804673	chr6:47543905	chr7:148580141	-1084	-	Ezh2	0.384058	0.0144928	0.680658	1.40923	0.941618	0.979848	1.43381	0.821022	1.12741	0.974065	0.682731	0.46988	0.317269	0.53012	0.908104	0.771816	1	1	FALSE	FALSE	0	0	0	TRUE
mm_Sliding_topH3K27Ac_slide_20_chr1:36360450	458	973	394	1620	250	619	667	592	1022	959	794378354	ATTTTAATTCTCTTACAAGGAATGGTGTTTAGAGAAATGACTTAACCGGATTACTCATCGTCGATAATGACTTGGCCCAGCTCCGAGGCTATTCCTAGACGTGACGCTTGAGGCTTTGATTCTTTTTACTTTTGCACA	mm	chr1:36360450	FALSE	1.02026	1.30865	chr1:36360470	chr2:97197950	-4087	+	Arid5a	0.405797	0.0434783	3.1503	3.20159	0.93193	0.843151	1.80588	1.37188	3.17595	1.16446	0.327309	0.0060241	0.672691	0.993976	0.721268	0.0847571	1	1	FALSE	FALSE	0	1	1	FALSE
mm_Sliding_topH3K27Ac_slide_20_chr19:7166385	1940	2761	2674	4902	1933	3221	3320	3815	3885	5376	2050702399	ATTTTATTCTTAGTAATCTCTTAAGCATTCCATACGTTGGGCCGCACGCCTGAGCTGAGCCTACCAGAGGCTTCATTCGCAAAATGCAAATGCCCCTGGCCCTGATGCCTCTCTCCTTCCTTGCCTTTTCTTCCCCGC	mm	chr19:7166385	FALSE	0.905901	0.887411	chr19:7166405	chr11:63889583	-13794	-	Flrt1	0.507246	0.0362319	1.15615	1.25295	0.865053	0.969254	0.989312	1.20417	1.20455	0.917154	0.783133	0.38755	0.216867	0.61245	0.935249	0.708068	1	1	FALSE	FALSE	0	0	0	TRUE
mm_Sliding_topH3K27Ac_slide_-80_chr2:93998290	70	32	54	97	94	463	546	555	686	988	250184722	ATTTTTTGAACGCTTTAGGTCTAAGACCCGCCTACATAGTCATATCCATGTGTCTATTGGTGACTTCTCTTTCCTGTAAGCGTACTATGTCTCCTATTGGTTAGCCTTCGTTTCGTAGCCCCGCCCACAATCCCCTTC	mm	chr2:93998290	FALSE	0.810658	0.852629	chr2:93998210	chr11:43702147	9	-	ENSMUSG00000027195	0.456522	0.0434783	0.275551	0.509841	0.676605	0.767253	0.734064	0.500063	0.617063	0.831643	0.901606	0.893574	0.0983936	0.106426	0.979189	0.960948	1	1	FALSE	FALSE	0	0	0	TRUE
mm_Sliding_topH3K27Ac_slide_20_chr11:105689600	119	76	95	198	107	480	514	535	540	818	474860226	CAAAAGTCCTAGGTACTGAGATACAGAAACTGTTTCTTGGCTCTTCTTGGTGCCTGCAGTTGTTTTACCATATGGCACTGCTCTAATTTTGTCTGTGTTCTTCTCTTGAGACTTTTGTGAATAGATTACATTTTTAGA	mm	chr11:105689600	FALSE	0.921747	0.81065	chr11:105689620	chr17:61372554	-12292	+	uc007lxo.1	0.376812	0	0.574923	0.914266	0.847226	0.893311	1.09629	0.772857	0.934575	0.870269	0.859438	0.676707	0.140562	0.323293	0.965821	0.885678	1	1	FALSE	FALSE	0	0	0	TRUE
mm_Sliding_topH3K27Ac_slide_-80_chr4:49533995	463	647	651	1280	364	469	455	607	524	738	273527545	CAAAATTCTCTACGTGTTGCCAAGGGAAGCTTCCACAGCCAGCCTCTTCTTGCTAACCGAGACACGATCAGCGCCGCCATTCTCGACAAGCAACCCAAGAGCGCCAGACGTGCCCGACTCAGCCAATCAGATGAGAGC	mm	chr4:49533995	FALSE	0.904392	0.871902	chr4:49533915	chr9:104160960	-130	-	ENSMUSG00000044018	0.557971	0.0652174	1.43874	1.7374	0.917546	1.1234	1.25384	1.55682	1.58807	1.02047	0.590361	0.126506	0.409639	0.873494	0.878124	0.421237	1	1	FALSE	FALSE	0	0	0	FALSE
mm_Endogenous_chr5:149436765	126	130	35	480	69	277	388	230	439	300	1033819920	CAAAGGCAAGCATCAGAGCTTCTTTTCAGACACAATGAGGTCAAGTCTGACGTCGTCATTGATGTATGTATATATGTCATGTTGAATTGAATTACTGTTAACGGTAACCATGACAACGAGAAATCTCATTCTCGTTGC	mm	chr5:149436765	FALSE	1.8972	1.79695	chr5:149436765	chr13:30491898	72400	-	ENSMUSG00000001687	0.391304	0.0362319	1.52501	3.43703	1.33312	1.04715	1.80005	0.441548	2.48102	1.84707	0.0200803	0.0140562	0.97992	0.985944	0.157029	0.117695	1	1	FALSE	FALSE	1	1	0	FALSE
mm_Sliding_topH3K27Ac_slide_-80_chr17:71948135	221	521	301	453	127	115	120	96	176	202	1878018766	CAAAGTCAAGCAGGAATGAATCGGCTCTGAGCTCTGATCGCCTCTCGGGCGCCTCAACCTCACAAGGAAGAACCACGTCGTCCTTAGAGAGCCTGACGTCCGGAGCAGGTGCTGTCGCACACGTGTGACGTAGCCACC	mm	chr17:71948135	FALSE	0.871428	1.06993	chr17:71948055	chr2:29093222	-126	-	Trmt61b	0.586957	0.0797101	3.32058	1.76232	0.821973	0.649116	1.71535	2.06311	2.54145	0.970678	0.690763	0.0120482	0.309237	0.987952	0.912309	0.106055	1	1	FALSE	FALSE	0	0	0	FALSE
mm_Sliding_topH3K27Ac_slide_20_chr7:116309730	106	58	56	171	132	446	457	464	583	771	407830466	CAAATCATGAATCATATGGGAAACTTTTAGCAAGACACCGCCATCCAAGGAGACAATTTACAGTTGAGTTAATCTGGGTACATTAGTGAGACATGGATTCTGGACGACAGACCAATTTATGTTGTTTCCCTGTCCCCC	mm	chr7:116309730	FALSE	0.869488	0.928554	chr7:116309750	chr11:8280686	-3872	+	uc009jdl.1	0.42029	0.0144928	0.355659	0.640049	0.835202	0.821989	0.791581	0.369295	0.580438	0.899021	0.805221	0.901606	0.194779	0.0983936	0.939288	0.960948	1	1	FALSE	FALSE	0	0	1	TRUE
hs_Sliding_topH3K27Ac_slide_20_chr10:105156355	273	182	236	423	104	830	277	748	210	180	669184407	CAAATCCCGCCCTTCCGATTCCTGTCTCTAGGTCACCTCCGCAACACAGCAACGGAAGTAGGGTGTTGAGCCCGCCCACACTTCCGGAAGAATTGCACTGGACTGTGGGTATCCTGGTCTCCGCGTGTGTGAGTACCG	hs	chr10:105156355	FALSE	2.2574	1.43265	chr10:105156375	chr19:47165255	NA	+	ENSG00000148843	0.57971	0.0652174	1.4165	2.00955	6.65759	5.67586	2.58757	1.97532	2.28145	6.16672	0	0.0240964	1	0.975904	0	0.171624	1	1	TRUE	TRUE	0	0	0	FALSE
mm_Sliding_topH3K27Ac_slide_60_chr6:149049100	389	603	682	1320	421	573	612	652	659	851	237283740	CAAATGGGGGCCATGCTCCTCCAGTGACACCTCGGCAGTGATTCACGGCGCGCCCCTCTTGGGGAGGATTGTCCAACTACATCAACTCAGGAACCAGGCAGGGGTATCAACAAAGCATCAGGCCGCAACCCAAGCGTC	mm	chr6:149049100	FALSE	1.05493	0.95093	chr6:149049160	chr12:31742875	-840	-	ENSMUSG00000030313	0.586957	0.0434783	1.15935	1.54911	0.972157	1.04645	0.910817	1.41014	1.35423	1.00931	0.616466	0.261044	0.383534	0.738956	0.889213	0.602666	1	1	FALSE	FALSE	0	0	0	FALSE
mm_Sliding_topH3K27Ac_slide_-40_chr15:37389160	86	183	126	232	97	121	183	142	174	139	760906876	CAACAGCGGCGGCGGCGGCAGCAGCAGCAGCAAGGTCCAGCATCCACCAGATTCTCACAAGCCTTTGACTGTGCGGACTCAGCCACAGACTCTGCCTCTGGCTGACGTCAAAGTCCCTGTCACATGGCCAGATAAAAG	mm	chr15:37389160	FALSE	1.93125	1.53719	chr15:37389120	chr8:102803244	-57	-	Ncald	0.586957	0.0434783	1.52707	1.1817	1.25685	1.39533	0.873957	1.13073	1.35439	1.73422	0.0301205	0.261044	0.96988	0.738956	0.209744	0.602666	1	1	FALSE	FALSE	0	1	0	FALSE
mm_Sliding_topH3K27Ac_slide_-80_chr1:23386900	161	156	221	282	190	189	195	240	267	328	48347836	CAACCCTTTGTCTCAACCCTTCCCACCCTGTCTGTGCTGACAGACTGGCATCATCTAAGCAGCTTTCACGCATTTCTGAAGTGGTGTGATTTCTCACTCTTACTACAAGTACAGAGATACTTTAACACCCAGCCCTCC	mm	chr1:23386900	FALSE	0.872093	0.999609	chr1:23386820	chr6:72001976	-3274	-	Ogfrl1	0.478261	0.00724638	0.664585	0.733308	0.831954	0.999401	0.835287	1.01251	0.923897	0.935851	0.75502	0.684739	0.24498	0.315261	0.929525	0.889409	1	1	FALSE	FALSE	0	0	0	TRUE
mm_Sliding_topH3K27Ac_slide_-100_chr8:10131055	155	89	149	359	105	53	75	108	109	155	2145544004	CAACCGTCCCGGATTTGATATTCAGAAAAGCAGGGCAGAATTGCTGACACGGACTCTGCATAGACAGCCATTCACGGAGTGAATGCCGCAGCTCTCCTGCCGCTGTTCTCCCTGGATGACTAATATATCAAGCATGGT	mm	chr8:10131055	FALSE	0.709792	0.86355	chr8:10130955	chr13:109115896	-23067	+	Myo16	0.507246	0.0434783	0.686089	1.68926	0.493691	0.951688	1.45514	1.23525	1.3452	0.786671	0.933735	0.269076	0.0662651	0.730924	0.988136	0.603625	1	1	FALSE	FALSE	0	0	1	FALSE
mm_Sliding_topH3K27Ac_slide_40_chr4:13134245	165	226	164	411	202	331	289	297	369	607	64046847	CAACGCTGTAAATGCAGAGCCAGCGTGCCGGTGAGACACTCAACAGCGTCTGCGCAGGATGAATCGTGTTCTTTCCCAGTCAGTTGGCTTTTCAAGATCTTTGCTAAAGAAGAGATGCAAAAACTCTCTGGGACTCTT	mm	chr4:13134245	FALSE	0.698411	0.746501	chr4:13134285	chr8:93706682	-59872	-	ENSMUSG00000080663	0.485507	0.0434783	0.905601	1.00527	0.787319	0.668298	0.805186	0.706727	0.955434	0.727808	0.961847	0.658635	0.0381526	0.341365	0.989773	0.881517	1	1	FALSE	FALSE	0	0	0	TRUE
mm_Sliding_topH3K27Ac_slide_40_chr8:108130750	936	544	710	1499	620	1620	1693	1531	1977	1862	2128921663	CAACTAGGTTTGGGGCAGTTGCCATGGAGACAGGGACAGGCTTTTGCGCGCGACCCCCTTCTCCCTTGCAGCCACCCTTTTGCCTGGGTTATTTATAGCTTCTGTTTACCTCAGTCTACTGTAGCCCTACAGCTGAGT	mm	chr8:108130750	FALSE	1.33376	1.30383	chr8:108130790	chr16:67564359	1702	+	Fam65a	0.536232	0.0217391	0.71021	1.19454	1.25616	1.12305	1.48815	0.996841	1.2425	1.3188	0.144578	0.353414	0.855422	0.646586	0.486213	0.679703	1	1	FALSE	FALSE	1	0	0	FALSE
mm_Sliding_topH3K27Ac_slide_-20_chr14:120674715	3889	5199	7664	9508	2938	3475	4476	4833	5050	7475	358433378	CAACTCCCAGCTACGGGCTGGGTGTCTCGAAGCGTATTTGTCTGAGCTACCCCTCTCTGTGCTCTGCCAATTATGTGCCACTTTGTCTCGGAGCTATGACTGCTTTCCTCGGAGAGGGAGATCCCTTTTCCATCAGTA	mm	chr14:120674715	FALSE	0.878376	0.829608	chr14:120674695	chr13:97874372	-215	+	Mbnl2	0.528986	0.0362319	1.43234	1.59893	0.671205	0.883096	1.30482	2.27072	1.78777	0.853992	0.883534	0.0783133	0.116466	0.921687	0.976353	0.337327	1	1	FALSE	FALSE	0	0	0	FALSE
mm_Sliding_topH3K27Ac_slide_60_chr7:28232360	135	410	355	668	295	250	235	349	259	471	374382996	CAAGACACAAAAGGAATCTCAGTTGATGTCACACACAGTCACACATAAATGGGATCATATCACGCACCCATGTGGTGTCCCAAACCTTCCCAATCCGAAAGTATCACACTCCATTACAGCTTACCATATCACACAGGC	mm	chr7:28232360	FALSE	0.731895	0.675261	chr7:28232420	chr19:40972538	-225	-	ENSMUSG00000011751	0.449275	0.0144928	1.12497	1.11878	0.766356	1.01206	0.451103	1.04753	1.12188	0.889209	0.825301	0.477912	0.174699	0.522088	0.952676	0.780344	1	1	FALSE	FALSE	0	1	0	TRUE
mm_Sliding_topH3K27Ac_slide_-20_chr10:58334820	139	430	131	601	85	199	309	271	369	331	1077120104	CAAGCAAGAAAGCTTAGCAGTTTTGGATTTGGAAATATTTGTGACGTAGGTAACTATGTATGTAATAATGTTATACAGCAGAGCCATCTGCCTTTGGAAGGATGTGTGTCACAGGCTTTTATGGGAAAGCATTTTTAT	mm	chr10:58334820	FALSE	1.36941	1.36896	chr10:58334800	chr2:109823948	57974	+	ENSMUSG00000037990	0.369565	0.00724638	4.09477	3.49339	0.868033	1.11826	1.61198	1.34156	3.79408	1.36918	0.118474	0.00401606	0.881526	0.995984	0.44793	0.0770232	1	1	FALSE	FALSE	0	0	0	FALSE
mm_Sliding_topH3K27Ac_slide_20_chr5:31593600	1104	1532	1919	2619	1223	1952	2700	1935	2684	2314	1691535529	CAAGCGCAGTGAGTCCTAAGGCGGGCCCATAAGAGGGGTTGTGGAATTCTCTCCGCGACCAATCCTGTGGCTGCATGCAAACCTAACGCAAACCTCCGCCCACAAGTCTTCGGTCCTCTCCGGATTCTACGTCACCAT	mm	chr5:31593600	FALSE	1.7116	1.42433	chr5:31593620	chr2:27712733	153	-	Ift172	0.565217	0.0652174	1.01394	1.05804	1.21795	1.14214	0.889828	1.36586	1.12785	1.56797	0.0502008	0.467871	0.949799	0.532129	0.280227	0.771101	1	1	FALSE	FALSE	0	1	0	FALSE
mm_Sliding_topH3K27Ac_slide_-20_chr6:31274950	326	1260	308	2030	262	374	799	505	791	525	60295530	CAAGCTTATTATCAGCATCCACTTATTCAGCCAGGATGCTGTGACGTCCATTGCAGAGAGTGAGTCAGAAGCCACAAGCTAACAGGTCTATTCCTTTCCTCTGTCACCTAGGAAACCAACTCATCATCCACAGGAAAT	mm	chr6:31274950	FALSE	2.23249	1.85016	chr6:31274930	chr7:130920652	2940	+	ENSMUSG00000087380	0.456522	0.00724638	3.89268	3.82812	1.02855	1.31382	1.22653	1.02331	3.8604	2.04133	0.0140562	0.00401606	0.985944	0.995984	0.130419	0.0770232	1	1	FALSE	FALSE	0	0	1	FALSE
mm_Sliding_topH3K27Ac_slide_-60_chr4:49533995	962	1684	1758	2488	657	826	1022	1147	1079	1422	694838935	CAAGGGAAGCTTCCACAGCCAGCCTCTTCTTGCTAACCGAGACACGATCAGCGCCGCCATTCTCGACAAGCAACCCAAGAGCGCCAGACGTGCCCGACTCAGCCAATCAGATGAGAGCTTACTTCAGCGGCCCCTGAC	mm	chr4:49533995	FALSE	1.05427	0.931783	chr4:49533935	chr9:104160960	-90	-	ENSMUSG00000044018	0.586957	0.0652174	2.0747	1.87101	0.838671	1.10171	1.44336	2.32923	1.97286	0.993028	0.654618	0.060241	0.345382	0.939759	0.900463	0.31382	1	1	FALSE	FALSE	0	0	0	FALSE
hs_Sliding_topH3K27Ac_slide_-20_chr2:27712733	193	308	210	242	144	86	111	98	131	246	1390541122	CAAGGTCACACGTAACTTTGCGGCGAAGCAAACAGAACGTGCGCAAGCGCGGTGAGATCTAGGGCGGGCCCTTGAGAGGGCTTCATGAATGTTCTCCTTGACCAATCCCGTCGCCGCATGCAAACTCAAGACCAAGCC	hs	chr2:27712733	FALSE	0.661896	0.653927	chr2:27712713	chr5:31593600	NA	-	IFT172	0.565217	0.0797101	1.73128	0.830317	0.504748	0.544118	1.32117	1.26945	1.29531	0.657911	0.971888	0.301205	0.0281124	0.698795	0.99035	0.629742	1	1	FALSE	FALSE	0	0	0	TRUE
mm_Endogenous_chr12:32036340	257	191	376	260	108	518	203	626	343	115	1386217115	CAAGGTCTCCCCACCCTGCGCCTGCGCAACATATACGTCATCGCCGAGGAGCAGCGCGATTGGCCCGAAAGGCAGAGGCTTTCCGGTCGCTTCGTCGTGCGCTGTCGTGAAGGGCGCTGCGCTTTGTGGCAGCTGGGG	mm	chr12:32036340	FALSE	2.58941	3.6626	chr12:32036340	chr7:107531553	4	-	Dld	0.652174	0.115942	1.43149	1.18944	6.50344	7.43496	2.3457	3.03056	2.68813	6.9692	0	0.0120482	1	0.987952	0	0.106055	1	1	TRUE	TRUE	0	1	0	FALSE
mm_Sliding_topH3K27Ac_slide_60_chr15:100435675	72	79	83	277	96	196	424	255	489	396	988160988	CAAGGTGAGGAACATTTTAGCTCATACATTATTTACCAGCCCTCACAGGCATAATAGACCGCGTGCATATTCATCATGCGGCATGTATTATTCATGAGAAGTTCCCTTCAACGGCTGGAAGAGAATGAGGTTGTTGGC	mm	chr15:100435675	FALSE	1.57062	1.51637	chr15:100435735	chr12:51619632	5380	-	ENSMUSG00000009739	0.442029	0.0289855	0.666094	1.42561	0.714615	0.879523	0.739307	0.752603	1.04585	1.5435	0.0562249	0.540161	0.943775	0.459839	0.296043	0.809416	1	1	FALSE	FALSE	0	0	0	FALSE
hs_Sliding_topH3K27Ac_slide_20_chr2:98770046	1241	806	941	3071	802	1533	1451	1545	2015	2878	1644871099	CAAGTCATGTTCCTGGCAGACACCTGTGATCTCTAATTAGGTATTTAGAGTGTATTGGCCCATCACTTAGGCTTGGCATTGCTTCTTTGTTTCTAATCTCCAATTTAATTTAGAAGCACTGATTGGTGCCTGTTTATG	hs	chr2:98770046	FALSE	0.739569	0.85976	chr2:98770066	chr1:37134960	NA	+	uc010yvi.1	0.398551	0	0.813468	1.89189	0.769064	0.73323	1.52532	1.02135	1.35268	0.799664	0.923695	0.263052	0.0763052	0.736948	0.987557	0.603625	1	1	FALSE	FALSE	0	0	0	FALSE
mm_Sliding_topH3K27Ac_slide_20_chr19:47165255	3417	3428	4700	3876	1856	5729	3412	5761	3285	2046	1003844919	CAAGTCCCGCCCTTCTACTTCCCGTTTCAGCCGGCGTCAGACCCGACGTCAGAACGGAAGTAGCCCTGGTCTTACCTACGCTCGTGGACGAGTCGCGTGGAGCTGTCGGCTCCCTGTTCTGCGCGTGCGATTGCGTTG	mm	chr19:47165255	FALSE	2.44627	1.97162	chr19:47165275	chr10:105156355	40	+	Pdcd11	0.623188	0.123188	1.495	1.0318	4.04282	3.84587	1.81481	2.20434	2.00957	3.94435	0	0.0542169	1	0.945783	0	0.305626	1	1	TRUE	TRUE	0	1	0	FALSE
mm_Endogenous_chr12:60230715	88	60	58	217	58	176	228	194	241	294	496772763	CAAGTTATGAGGTCCCTGAAATTGGATTACGGGTTGGTAGTCACAGCTCCACCTATAGTACCCCTCTGTTACAGCGTCAAAACAGGATCACACTCTGTGTGGAAACGGGAGTGCAGAAGGTATTAAAATCTGGACTCT	mm	chr12:60230715	FALSE	1.1376	1.00661	chr12:60230715	chr14:39734448	-17	+	Ctage5	0.463768	0.0217391	0.837342	1.84851	0.864324	0.901274	1.49561	0.870481	1.34293	1.07211	0.487952	0.271084	0.512048	0.728916	0.83051	0.603625	1	1	FALSE	FALSE	0	0	0	FALSE
hs_Sliding_topH3K27Ac_slide_-20_chr3:129158957	1384	1328	1522	2468	1068	2384	1936	2473	2481	2667	913791554	CAATCAAATCCATTCTCGAGGAAGACGCACCGCCCCCACACGCCCCGACCAATCGCTCGCGCTCTGGTTGCGCTGGCGCCTTAGGGGCTCCAGTGCCACCATTGCTTTTGCTGCTTTTCTGGCTTTCCCTTTCGGACA	hs	chr3:129158957	FALSE	1.06484	1.14234	chr3:129158937	chr6:115803490	NA	+	ENSG00000163913	0.594203	0.0797101	1.00648	1.14173	1.29061	1.2665	1.2774	1.24052	1.25896	1.27855	0.172691	0.333333	0.827309	0.666667	0.532657	0.657663	1	1	FALSE	FALSE	0	0	0	TRUE
mm_Endogenous_chr7:104100055	450	986	543	877	361	1141	761	1263	923	479	1908481800	CAATCACGCATGCTCAGACTCCACCCAGCGTGATGACGGAAGAGCGAGCACGGGGTGACGTAGCTCAGTTGCAACGTGCTTTAAGTCTGGGTCTGCACTCCGGTCCCATGTACGGTGTGACACTGACCGCTGTGTTCC	mm	chr7:104100055	FALSE	2.33051	2.36624	chr7:104100055	chr11:78285840	-16	+	ENSMUSG00000018995	0.57971	0.0724638	2.2108	1.20028	3.43923	3.60139	1.22876	1.30934	1.70554	3.52031	0	0.0923695	1	0.907631	0	0.359529	1	1	TRUE	TRUE	0	0	0	FALSE
mm_Sliding_topH3K27Ac_slide_-20_chr3:89154275	154	226	234	213	142	187	205	171	296	228	1321747809	CAATCGCCATACACAGCGTCGTCGTTGCTGTCGCTGTGGGCGGATGACGAGAGCTCTTCGCGGGGCGTGCACACCGGGCAGAGCCGTTGCATGTCGTCCCAGCACGACCGGCAGTACAGGGCCTTGCAGTCTGGTGTG	mm	chr3:89154275	FALSE	1.31893	1.59423	chr3:89154255	chr1:155023272	303	-	Adam15	0.644928	0.108696	1.28825	0.74111	1.18418	1.02439	1.06904	1.43445	1.25175	1.45658	0.0823293	0.341365	0.917671	0.658635	0.376849	0.665478	1	1	FALSE	FALSE	0	0	0	FALSE
hs_Sliding_topH3K27Ac_slide_60_chr10:111971059	378	391	340	807	172	567	320	491	526	398	1314339454	CAATCGGCAGCTCCAGCCTCTTCTGACGTCACGCGTTGCTGGGGCCGGAGGCTGGGTGGGGGGTGGAGCCAGGCTGCAAGCCAGGAAATCTCTGGGAGCTGTAGTGCGGCCAGCTGGTCCAGTCTCTTCTTAAAGGGA	hs	chr10:111971059	FALSE	1.17942	1.62291	chr10:111971119	NA	NA	+	MXI1	0.630435	0.0434783	1.84004	2.31812	2.05689	1.685	2.16634	1.72072	2.07908	1.87095	0.0200803	0.0441767	0.97992	0.955823	0.157029	0.267948	1	1	FALSE	FALSE	0	1	0	FALSE
mm_Sliding_topH3K27Ac_slide_40_chr1:75260885	1680	6982	2452	11775	1684	1627	6969	1800	7778	3622	288113804	CAATGACGACATCTCCACCCCCGGCTCTTATGCCTATTTGCGTCATACTGGCGTAAGAGCCCCCTCTTAGCCGGGGACCTACTCAACCTAAGCCTCCTCCACCATATAGTAGGTTCCTCCCTAGAATTCCCACTGGGT	mm	chr1:75260885	FALSE	2.82243	2.63701	chr1:75260925	chr2:220174240	182	-	Ptprn	0.543478	0.0362319	3.35596	3.4547	0.64856	0.678776	0.983401	1.26747	3.40533	2.72972	0.00200803	0.0060241	0.997992	0.993976	0.0259157	0.0847571	1	1	FALSE	FALSE	0	1	0	FALSE
mm_Sliding_topH3K27Ac_slide_-80_chr11:88218720	153	137	150	311	205	657	823	808	804	1308	788704963	CACAAACGGTCGTGTGCACACAGGCGTGTGTGATGTGTAGGGCTCGGGATCTCTCCCTCTCCCACGTAAACACGGGATTCGTTTATTAAATGCCTCTCTGCCATTTCCTTTTTTGCCTTCATCCTGCTTGTTTAATAT	mm	chr11:88218720	FALSE	0.922983	0.754816	chr11:88218640	chr17:55682456	-28456	-	ENSMUSG00000084411	0.478261	0.0507246	0.540937	0.749545	0.725219	0.843735	0.735701	0.636937	0.686319	0.8389	0.895582	0.845382	0.104418	0.154618	0.976353	0.944601	1	1	FALSE	FALSE	0	0	0	TRUE
hs_Sliding_topH3K27Ac_slide_-100_chr10:111971059	1168	1422	1660	2796	1164	1565	1691	1483	1736	2314	978627769	CACAACCTCCCCGCCTTCATTTCAGCGAGTTCCCCTATAATCACTTGATCTCGGTTTCTCCGCCTTCTCCTCCTCCCCCTCCCAGCTAGAGACACATGGTTTCCACATGGAGACAAACTTCTTTCCTCCGACTGGACT	hs	chr10:111971059	FALSE	1.07197	0.921254	chr10:111970959	NA	NA	+	MXI1	0.528986	0.0362319	0.98884	1.18679	0.976478	0.875347	0.98913	1.24141	1.11527	0.996611	0.646586	0.483936	0.353414	0.516064	0.900134	0.780344	1	1	FALSE	FALSE	0	0	0	TRUE
mm_Sliding_topH3K27Ac_slide_-20_chr17:71948135	473	485	506	856	299	510	387	424	390	488	1343450974	CACAAGGAAGAACCACGTCGTCCTTAGAGAGCCTGACGTCCGGAGCAGGTGCTGTCGCACACGTGTGACGTAGCCACCGCCGTGCCCTTTGCCCGGTTTTGGGGTAGTGCAGGCTGTGGGCTCCCCCGCGTCGCCGAC	mm	chr17:71948135	FALSE	1.1633	0.981381	chr17:71948115	chr2:29093222	-6	-	Trmt61b	0.652174	0.101449	1.31296	1.41447	1.5089	1.18672	1.55939	1.47312	1.51625	1.34781	0.128514	0.168675	0.871486	0.831325	0.465782	0.497474	1	1	FALSE	FALSE	0	0	0	FALSE
hs_Sliding_topH3K27Ac_slide_20_chr3:9273037	435	708	571	963	559	1634	1708	1826	1913	2206	1571156206	CACAATCCCTTGTCATTCATCTTGCCTCCCTTGGAAACGGCCGTCACCCATTTGGCAGTAATGAGGATGGAAGGATGCGGTTCTGTCTCTTTAGAAAACTGGGCAATTAAATTTTCTTTAATGAAGTTCTTTATTTTC	hs	chr3:9273037	FALSE	1.13575	1.06488	chr3:9273057	chr6:112880270	NA	+	SRGAP3-AS3	0.413043	0.0217391	1.02518	0.851149	1.06944	1.13057	0.767081	0.889167	0.938166	1.10032	0.413655	0.676707	0.586345	0.323293	0.773041	0.885678	1	1	FALSE	FALSE	0	0	0	TRUE
hs_Sliding_topH3K27Ac_slide_-100_chr3:185080927	409	586	653	1393	369	284	409	373	388	581	1700600011	CACACACACACACTCAAGCTGCCAGTCTGTCTTAAGGCAGTGGCAGATGCCTGATTGGCGGGCTCTGTTTATTCTGTGACCAGATTCCTTCTAAAAGAAGGAAGGCCATGTCTGCCTGAAGCCTATTGGCTGGGCCTA	hs	chr3:185080927	FALSE	1.03264	0.820065	chr3:185080827	chr16:21846060	NA	+	ENSG00000073803	0.514493	0.00724638	1.28544	1.86516	0.705754	0.87687	1.0926	1.54044	1.5753	0.926353	0.767068	0.13253	0.232932	0.86747	0.929525	0.424903	1	1	FALSE	FALSE	0	0	0	FALSE
mm_Sliding_topH3K27Ac_slide_60_chr2:139503255	1889	1952	1924	2893	1539	3845	2215	3508	2865	3356	209117873	CACACCGTGTTCTTCGCAGCCTCCCACGCGACACCTGCGCACTTAAGTAGACGCGCGCGGATTGAATCCAACTCACCCGCCTTTCCGACGCTCCAGGGCGCTGTAGGCGCACGGTCTGCTGCACCCAGTGATCAGCCA	mm	chr2:139503255	FALSE	0.968174	1.04832	chr2:139503315	chr20:13201228	-75	-	ENSMUSG00000085071	0.630435	0.108696	1.02665	0.928755	1.65419	1.42771	1.20992	1.08824	1.14908	1.54095	0.0562249	0.445783	0.943775	0.554217	0.296043	0.75425	1	1	FALSE	FALSE	0	0	0	FALSE
mm_Sliding_topH3K27Ac_slide_-80_chr3:126960670	49	118	37	121	67	78	134	87	170	180	1498650469	CACACTGCGTTCCCAGCTGAAGGATTGGAAGCTGCCCAGGGGAAGAAATGCTGTTCCACGCTGAACTGCTCCTGTGTACAAAAGACTCTTTTCACCCGGGCTTAGGGAGGTGAAACAATGCCCTCTGCTCTCCTTACT	mm	chr3:126960670	FALSE	1.09203	1.15976	chr3:126960590	chr4:113942326	31745	-	ENSMUSG00000032826	0.528986	0.0217391	1.42556	0.892281	0.625653	0.66016	0.720916	0.480713	1.15892	1.1259	0.371486	0.439759	0.628514	0.560241	0.740599	0.751902	1	1	FALSE	FALSE	0	0	0	TRUE
mm_Sliding_topH3K27Ac_slide_80_chr12:112127360	4360	2678	5023	2548	982	2983	1558	3101	1875	1815	746341297	CACACTTGTGGCTCTGCCGCTCTAGCCCTCCGCGGAGTCACTGCTACTCTCTGAGGCCTAACCCGTTGCCTAGGCAACAGGCTCCCAGCAGCCCCTGCGGCCCGGAGTCCATCCCGCCTCCTCCGGGTTGGCGGGGCT	mm	chr12:112127360	FALSE	1.25919	1.26858	chr12:112127440	chr14:102829271	165	-	Cinp	0.681159	0.0652174	2.20739	1.28197	2.37295	2.33361	4.37662	4.45257	4.41459	2.35328	0.0060241	0.00401606	0.993976	0.995984	0.0728194	0.0770232	1	1	FALSE	FALSE	1	0	0	FALSE
mm_Sliding_topH3K27Ac_slide_60_chr18:37803865	8365	8638	8237	10368	3066	44457	17574	42876	22634	6645	1932935648	CACAGACCGGAAGCAGACACGGAGGGGCTGGCCGCCGCTCTTCCGGAAGTACTAGCGGCGCGCGCAGGCGCACTTCGTAATTACGTCGTTCCGTGACTACGTCTTCTCGTGAGAACTTGCCCTGTATAGGCTGTTTCC	mm	chr18:37803865	FALSE	3.87952	4.18272	chr18:37803925	chr5:140700384	127	-	Taf7	0.601449	0.115942	2.28045	1.67076	9.65954	8.81296	2.68941	2.3386	2.51401	9.23625	0	0.0120482	1	0.987952	0	0.106055	1	1	TRUE	TRUE	0	1	0	FALSE
mm_Sliding_topH3K27Ac_slide_40_chr12:71469945	766	995	914	1416	580	729	770	819	1121	1262	1888999237	CACAGATATTTTAAACCTTCAGTGACGTTTCAACATGCTGGAGATTGGAAGGCAGGGCTCTTGGCTTCGTCTCAGACTCATGCTGCCTCTGCTGCTGAGTGTGGAGATGAATTTATAACACCGAACTCTTCCCTGCTC	mm	chr12:71469945	FALSE	0.895021	1.09078	chr12:71469985	chr14:51607152	21424	-	Trim9	0.478261	0.0217391	1.38859	1.20622	0.834026	0.886394	1.30186	1.37176	1.33681	0.992903	0.654618	0.273092	0.345382	0.726908	0.900463	0.603625	1	1	FALSE	FALSE	0	0	0	FALSE
mm_Sliding_topH3K27Ac_slide_80_chr16:21846060	211	223	179	700	249	340	339	380	469	558	479754437	CACAGCCACTAAGTCTGTGCGGAATCCTAAACCAGCCCAATTTACATCCATTCATGAATGTGTGACGTCAGCAAGCTTTGAGCTCCTTTGCGGTGGGCCAGAGGATTGTGTGGGTAGAATCCCCTCCCCCTTATTTTT	mm	chr16:21846060	FALSE	0.891184	1.03212	chr16:21846140	chr3:185080927	371	-	ENSMUSG00000092078	0.492754	0.0217391	0.724912	1.38896	0.879743	0.930147	0.835308	0.625767	1.05694	0.961653	0.704819	0.526104	0.295181	0.473896	0.912309	0.796228	1	1	FALSE	FALSE	0	1	0	TRUE
mm_Sliding_topH3K27Ac_slide_-40_chr13:69900465	2997	4719	3348	7674	5292	2651	2867	3120	3324	10271	1415649236	CACAGTGGAGCATGTCGTTCATGGCTGCACTGTGGTCTGCGCATCGTTCAGAGCCTCGGCCCATCTGTCTGGCTCCCTTGCCTGGCTCCCACACCTCTTGCAGCCTCCAGTCTGGGCTCCTCTCCAAGGCAGTGCTTA	mm	chr13:69900465	FALSE	0.409465	0.397412	chr13:69900425	chr5:6430764	21610	-	Ube2ql1	0.608696	0.0289855	0.721788	0.716462	0.372656	0.414901	0.558252	0.550712	0.719125	0.403439	0.995984	0.821285	0.00401606	0.178715	0.998602	0.929292	0.689357	1	FALSE	FALSE	0	0	0	TRUE
mm_Sliding_topH3K27Ac_slide_-40_chr15:72682960	483	393	402	1013	264	295	339	348	351	465	69210383	CACATGATAGTCCTGTGCTTTGTCCACTCTATGCAAGCAATCGTCTCCAGTGTTCCTGAGGCTTTATTCACACTGTCCCTGAGGATGGCGAGTCTGCATACACGACAGGAAGTGAGAACCAGATGGTTACAGGCTTGA	mm	chr15:72682960	FALSE	1.06942	0.92693	chr15:72682920	chr8:141152802	42126	-	Peg13	0.492754	0.0217391	1.20495	1.89582	0.915968	1.02218	1.80346	1.3255	1.56448	0.998175	0.64257	0.134538	0.35743	0.865462	0.898186	0.424903	1	1	FALSE	FALSE	0	0	0	FALSE
mm_Sliding_topH3K27Ac_slide_80_chr15:37389160	1775	2108	1619	2924	962	1066	1109	1359	1472	1785	2143270864	CACATGGCCAGATAAAAGCCAAGAGAGCATTGGTTGTCGTAGCAACCACAGACTGGCTCTGAAATTATTTCAATAGGTCATCTGTCACTGATGTGTGTGCTCGTGTGTGTGCATATCTGTGTGTGCATGTATGTATAC	mm	chr15:37389160	FALSE	0.911371	1.01266	chr15:37389240	chr8:102803244	183	-	Ncald	0.442029	0.0144928	1.77368	1.50174	0.862244	1.03988	1.81881	1.46498	1.64189	0.962014	0.704819	0.11245	0.295181	0.88755	0.912309	0.396103	1	1	FALSE	FALSE	1	0	0	FALSE
mm_Sliding_topH3K27Ac_slide_-40_chr18:53904745	243	257	286	647	132	368	332	362	396	389	700238827	CACCAAAAATAATAAGAAGAAGAATGGCCAGAGTGTGAACTGTTCTTACTCAGCACTTCCCTGTTTGTCCTATGAAAACAAGTAGCGTCAATACGGTAGTTACTGTAACCGCTGGCGCTGACGTAATCTCTCCCAGAT	mm	chr18:53904745	FALSE	1.25196	1.25008	chr18:53904705	chr5:122759555	458	-	ENSMUSG00000048799	0.434783	0.0362319	1.57594	2.42171	1.36587	1.27105	1.81466	1.88604	1.99882	1.31846	0.144578	0.0542169	0.855422	0.945783	0.486213	0.305626	1	1	FALSE	FALSE	0	1	0	FALSE
mm_Sliding_topH3K27Ac_slide_-20_chr9:54582335	9823	16875	18537	19976	12518	37722	23436	39085	35956	23442	185705978	CACCATTCCCCAACTCTGCCCAGCACACCAACTCACCACCGTACAGCCAGCCGCACAGCACGCCTGACGTCAGTGGAGCACGACCGTGGCGCTCGTGGATGAGCTAACGAAGGGGCGGGGCCTCTCCTGGGATGCGGG	mm	chr9:54582335	FALSE	1.46653	1.88352	chr9:54582315	chr15:78591958	-40	-	uc009prn.1	0.65942	0.0797101	1.09116	0.788433	2.32333	2.27729	0.773522	1.28903	1.03128	2.30031	0.00803213	0.558233	0.991968	0.441767	0.0925312	0.820032	1	1	FALSE	FALSE	0	1	0	FALSE
mm_Sliding_topH3K27Ac_slide_60_chr1:39044485	967	1055	918	1433	510	360	299	406	461	463	1259642209	CACCCACCGGAGGCACGGCCTGTCATTCCAACGCTCTCAGCCTTCGCCCGGGTTCCTGAGGACCAGGCGCAGACTCCAGTCTTCACTTCCTCCTTGGCTCCGCCCTTTTCGTGCCTGGGGGCGGGGAGAAGACCGGAG	mm	chr1:39044485	FALSE	0.94731	1.22268	chr1:39044545	chr2:101179298	-53	+	Pdcl3	0.65942	0.0724638	1.67441	1.38825	1.12262	1.1977	1.86905	1.56687	1.71796	1.16016	0.331325	0.0903614	0.668675	0.909639	0.721268	0.356155	1	1	FALSE	FALSE	0	0	0	FALSE
mm_Sliding_topH3K27Ac_slide_80_chr5:32000875	5012	4494	5412	8573	3803	4016	4364	4101	5525	6143	1257334959	CACCCCTTTCCGTTCCATGACGTCAACGGGGGCACATGTTTCCGTGTTTGTCATCCTCTCCTAATTGCGAGAGCCTAGATGGTGCTTTATACGTCTTTGTGTTCCCCAGACAGCCTGCCCACTAAAAGACCTCATGTG	mm	chr5:32000875	FALSE	1.04209	1.10445	chr5:32000955	chr2:28114146	612	+	ENSMUSG00000052139	0.514493	0.0434783	0.956503	1.11378	0.943897	0.911825	1.29912	1.23877	1.26894	1.07327	0.47992	0.319277	0.52008	0.680723	0.822959	0.638368	1	1	FALSE	FALSE	0	1	0	TRUE
hs_Sliding_topH3K27Ac_slide_-60_chr16:67564359	79	119	105	63	100	146	124	127	176	199	1552295869	CACCCGACAGCCTCCGCCCGGTTCCGGGGTGGGGGGTCCGGGGCTGTGCCGCTCCCCCTCCCTCCTATACGCTTGGGCAGCTGCGAGATGACGTCAGCCGCCGGGTTTGGGGGCAGTTGCCATGGAGACAAGGACAGG	hs	chr16:67564359	FALSE	0.914051	1.08606	chr16:67564299	chr8:108130750	NA	+	ENSG00000039523	0.702899	0.0797101	0.963222	0.311266	1.05928	0.871672	0.778737	0.914005	0.846371	1.00005	0.640562	0.748996	0.359438	0.251004	0.898186	0.918492	1	1	FALSE	FALSE	1	1	0	TRUE
mm_Sliding_topH3K27Ac_slide_60_chr11:98448655	311	606	368	1085	257	245	446	209	448	430	1329228028	CACCGGCCCGCCCGGCGCCTCCTGGGAGTTGTAGGCTTTTCCCTGGTCTAGCTTTTGATCCCACCGCGAGCTTTGGCACCCCGCAGAACGTCCCACCCTGACGCAATAGTGAGATCAGATGCTGTCTCTTTGGTGCGT	mm	chr11:98448655	FALSE	1.52149	1.27939	chr11:98448715	chr17:38083947	93	-	ENSMUSG00000038150	0.608696	0.0724638	1.90862	2.08587	0.822638	0.663866	1.19286	1.24645	1.99725	1.40044	0.0983936	0.0542169	0.901606	0.945783	0.396927	0.305626	1	1	FALSE	FALSE	0	1	0	FALSE
mm_Endogenous_chr10:126507430	529	731	633	909	493	528	653	624	628	598	1426036415	CACCGTCCCACCCCTGCTTCTGGATTGGTGAAACTCGTGGCTAATCCAAGACATCCAGGACTTCAATGCCAATCAATCTGCATTACGTCACCAGCCTGCCTCCCAGTCTTGCCCTTAGTTTCTTCATTGGAGGAAACT	mm	chr10:126507430	FALSE	1.60182	1.28959	chr10:126507430	chr12:58138732	-106	+	LOC100504703	0.507246	0.0217391	1.20019	0.910978	1.27481	1.42523	1.05772	1.11768	1.0877	1.4457	0.0863454	0.504016	0.913655	0.495984	0.384467	0.788645	1	1	FALSE	FALSE	0	1	0	FALSE
mm_Sliding_topH3K27Ac_slide_-60_chr2:28291155	435	239	263	709	392	718	569	679	717	745	1352687712	CACCTCACTTGCTCTCCGTGAGTGGGGAAGCGTGCCTGTGGTAACTTCCTCAGGCACATCTGCCATGGGCATATATTCCTGCTGGTTAACATTCTATTTTGGGTTTTCATACGTAAGTCATACAATCTTAGAACGCCT	mm	chr2:28291155	FALSE	1.12036	1.18183	chr2:28291095	chr9:138365754	-11284	+	ENSMUSG00000035829	0.471014	0.0289855	0.493505	0.893617	1.39149	1.24485	1.09387	0.584021	0.838947	1.31817	0.144578	0.75502	0.855422	0.24498	0.486213	0.918492	1	1	FALSE	FALSE	0	0	0	FALSE
hs_Sliding_topH3K27Ac_slide_-40_chr21:43430367	1401	1886	1608	2666	785	1065	1431	1687	1690	1808	265160985	CACCTCAGAGTTACGTCAGGAAAGGCCGCGTTTTGCGGGGAGGCTGTAGCCTCCCAAGGAGCCCCGCAGTTCTCCTAGAGCTAGGGGCGTGACAGTTACTCACCGGTCTTCAGTCTCGAGGCAGACGCCGGGCCCCTT	hs	chr21:43430367	FALSE	1.16103	1.14784	chr21:43430327	chr16:98183685	NA	-	ENSG00000173276	0.623188	0.0724638	1.9447	1.67796	0.850477	1.27444	1.75927	1.7831	1.81133	1.15443	0.333333	0.0742972	0.666667	0.925703	0.72202	0.327844	1	1	FALSE	FALSE	0	1	0	FALSE
hs_Sliding_topH3K27Ac_slide_40_chr2:98770046	404	304	330	1353	306	567	576	663	609	842	1380490432	CACCTGTGATCTCTAATTAGGTATTTAGAGTGTATTGGCCCATCACTTAGGCTTGGCATTGCTTCTTTGTTTCTAATCTCCAATTTAATTTAGAAGCACTGATTGGTGCCTGTTTATGGCTTACTGGCAGCGGGAGAT	hs	chr2:98770046	FALSE	1.00349	0.888174	chr2:98770086	chr1:37134960	NA	+	uc010yvi.1	0.413043	0.00724638	0.80414	2.18458	0.97226	1.07548	1.30144	0.938754	1.49436	1.02387	0.584337	0.176707	0.415663	0.823293	0.877528	0.501658	1	1	FALSE	FALSE	0	0	0	FALSE
mm_Sliding_topH3K27Ac_slide_-100_chr12:40949955	367	1093	450	773	729	1273	1199	1185	1783	1153	1656636764	CACGACGCCTTAAGTAGCCAGACGGCGGCTTGTCGTCACCATGCGTGGGCGGGCCTCCATCGCTCGCTGGCCAATCGCTGCAGATCTCCCCACCGCGGCGTCCACTGGGGCGGTGCCTGCATTCGGACTCCCATTCCC	mm	chr12:40949955	FALSE	1.52543	1.89896	chr12:40949855	chr7:112090356	-195	+	Gm7008	0.673913	0.108696	1.21359	0.523894	1.59408	1.40376	0.496252	0.537334	0.868742	1.71219	0.0341365	0.732932	0.965863	0.267068	0.221115	0.913817	1	1	FALSE	FALSE	0	1	0	FALSE
mm_Sliding_topH3K27Ac_slide_-80_chr16:4880600	179	58	128	177	69	101	89	116	121	123	657088915	CACGACTGCCATTCCCACAATGCCCCGGTTTATTTGCATCTTTCTGTCCCAGTGACGTCACCTGAGTGAGGTCGCGACTGTACCAATGGGCCGTCACGGGGTGTTAGGACCTGGCCATATAAGGTAAACAAAGCTGGC	mm	chr16:4880600	FALSE	1.06142	1.20802	chr16:4880520	chr16:4666422	125	-	ENSMUSG00000039568	0.543478	0.0507246	0.680391	1.2674	1.18557	1.28812	2.55722	1.6148	2.08601	1.23684	0.210843	0.0441767	0.789157	0.955823	0.586568	0.267948	1	1	FALSE	FALSE	0	1	0	FALSE
mm_Sliding_topH3K27Ac_slide_40_chr4:49644870	4706	5447	6895	9260	3038	18401	7478	19050	8051	4276	245605902	CACGCGTCACTTCCGCCTGGCGGTCTCCCACACGTCACTTCCGCCCTCTCCTCGCCGTGCCTCGGGTAAAGTTGAAGCAACTTCCTTTTCCTTTTCCCTACTTCCTCTCCGTGCCTCCGCCTCCGTGGAGCTCAGTCC	mm	chr4:49644870	FALSE	2.56537	2.31209	chr4:49644910	chr9:104296048	73	+	ENSMUSG00000028309	0.615942	0.0869565	1.45127	1.50596	6.2132	6.08499	1.52696	1.97563	1.7513	6.14909	0	0.0863454	1	0.913655	0	0.352047	1	1	TRUE	TRUE	0	0	0	FALSE
mm_Sliding_topH3K27Ac_slide_-40_chr4:108673090	692	551	469	1154	395	541	489	599	516	682	1666673687	CACGGAGCGCTACGCGGTTTTCCTAAAAACAGCTACGGACGCACGTCACAATCGCAGCAAGACTTCTCCCATCATCCTCCGCCTCTTTTCCTTCGCCCCGCCCACGTCAGGTTTCGAAATGCTCTCTGGGTGCGCCAG	mm	chr4:108673090	FALSE	1.05178	0.929091	chr4:108673050	chr1:52344622	-249	+	ENSMUSG00000053510	0.57971	0.101449	1.1291	1.44344	1.14531	1.19962	1.72692	1.03356	1.38024	1.17247	0.303213	0.23494	0.696787	0.76506	0.695809	0.568793	1	1	FALSE	FALSE	0	0	0	FALSE
hs_Sliding_topH3K27Ac_slide_-20_chr21:33629476	98	30	126	190	111	73	65	68	108	124	1304854702	CACGGGACTTGGCTCGCCTGCTCTATGGCTGACATCCAAAGCTGACTCACTTAAGTTTCGACTGGTTATGGCTTCGCTAAGGGGGACATAGCGATTGAGGAGAGAGGACAGGGGAACTTGAGCAAGTGAAATGACTAT	hs	chr21:33629476	FALSE	0.768942	1.06953	chr21:33629456	chr16:90710185	NA	-	ENSG00000261610	0.507246	0.0362319	0.218765	0.845711	0.849987	0.749013	0.870295	0.988113	0.929204	0.919238	0.7751	0.678715	0.2249	0.321285	0.931695	0.886954	1	1	FALSE	FALSE	0	0	1	TRUE
mm_Sliding_topH3K27Ac_slide_-20_chr19:43526950	241	268	144	600	133	310	392	250	504	795	1786516639	CACGTAATGAAGCTCTGCTCTGCTATTTCTGTGGTGTTGCTTAGCAAGCCAAGTTGCCAACTGGCTTTGATTCTAGTGACTAACAACTTTTTTCGTGCCCTGGTGATGTTGGTTACCATGGTGCTCTGGATGACACAG	mm	chr19:43526950	FALSE	0.723304	0.778496	chr19:43526930	chr10:101102134	10881	+	ENSMUSG00000025189	0.463768	0.0144928	1.63103	2.2289	0.562997	0.429512	1.7862	0.942475	1.92997	0.7509	0.953815	0.064257	0.0461847	0.935743	0.989773	0.326851	1	1	FALSE	FALSE	0	0	0	FALSE
mm_Endogenous_chr11:98448655	2574	2079	2352	3306	922	1501	1201	1613	1460	1422	452056878	CACTACCACGCGCCTATCACGTTGTGCCTCTTGGGAAGTGTAGTTTCTAGGCTGCCTCCTCACCGGCCCGCCCGGCGCCTCCTGGGAGTTGTAGGCTTTTCCCTGGTCTAGCTTTTGATCCCACCGCGAGCTTTGGCA	mm	chr11:98448655	FALSE	1.23893	1.2608	chr11:98448655	chr17:38083947	-27	-	ENSMUSG00000038150	0.601449	0.0652174	1.82517	1.77159	1.52403	1.54931	2.75195	2.22058	2.48626	1.53667	0.0562249	0.0140562	0.943775	0.985944	0.296043	0.117695	1	1	FALSE	FALSE	0	0	0	FALSE
mm_Sliding_topH3K27Ac_slide_60_chr15:82176345	1348	1576	1518	1964	1274	3756	3242	3505	3706	3188	1067936714	CACTACGTCGTCCGGGCGCCGAGGACTTTCCCACCGGCATACGAATGCGTGCTCTGCGCAGGCGGGAGGGCGGTGCTTCCCGTGTGTGTCACGAGTCTCGCGAGTTTTGGAGAAAGTTTCTGCCAGAGGCCGCCTTGG	mm	chr15:82176345	FALSE	1.49175	1.42751	chr15:82176405	chr22:42475584	82	+	ENSMUSG00000022452	0.637681	0.115942	1.0013	0.761664	1.70106	1.50166	1.043	1.0372	1.0401	1.60136	0.0441767	0.550201	0.955823	0.449799	0.259246	0.817326	1	1	FALSE	FALSE	0	0	0	FALSE
mm_Sliding_topH3K27Ac_slide_-40_chr1:13178725	1668	2735	2050	3505	496	1336	2120	1467	2752	1171	1859146199	CACTATGATATGCTCTGATGGCAAGAGCTGACATTTGCTTCTGTTGCCTAGCAACCGCTATGCTATGATGCAAGCATGAGTGTGCATCTATGCCTAGGAACAGCTCTCCGAGCACACACATGCTCTCCCTGTTGAAAG	mm	chr1:13178725	FALSE	2.65571	2.88592	chr1:13178685	chr8:71085226	37546	-	ENSMUSG00000005886	0.485507	0.0144928	4.46329	3.49138	1.64726	1.7111	3.31496	3.59775	3.97734	2.77082	0.00200803	0.00401606	0.997992	0.995984	0.0259157	0.0770232	1	1	FALSE	FALSE	0	0	0	FALSE
hs_Sliding_topH3K27Ac_slide_40_chr6:17707191	46819	31027	53163	56677	11801	68921	19121	72603	27357	19433	1695505873	CACTCATCGGCGCCCGACGCATTTGCATCATCATGCTGCGACGAGCTGATAGGCAAAGAGGAAGGGCTGGTCGAGTCCACGCTCTCGGCCGCGCGGCACGCTGGGAAACGTAGTTCAACAACGGAACGCGGCTTCTCG	hs	chr6:17707191	FALSE	1.44335	1.72871	chr6:17707231	NA	NA	-	NUP153	0.615942	0.130435	2.12814	2.3729	5.12063	5.1029	3.91081	3.92148	3.91614	5.11176	0	0.00401606	1	0.995984	0	0.0770232	1	1	TRUE	TRUE	0	0	0	FALSE
mm_Sliding_topH3K27Ac_slide_20_chr13:53077460	303	292	365	710	214	406	407	395	622	613	1915166240	CACTCCCCGCGTTTACAGACACGTAAGATTATAGCCGGCCTTGGCAAAGGGAGCCATATTCCTGACAGTGACGCACGCGCTTGCCCAAATACGGAATGTGGCAGGTGGCAAGGTCCTTGAGCTCGGACTGTGGGACCT	mm	chr13:53077460	FALSE	0.973948	1.24601	chr13:53077480	chr9:94187338	1058	-	ENSMUSG00000056749	0.565217	0.0652174	1.10446	1.63921	0.956262	0.880114	1.3957	1.4847	1.4402	1.10998	0.395582	0.198795	0.604418	0.801205	0.753687	0.52343	1	1	FALSE	FALSE	0	0	0	FALSE
mm_Sliding_topH3K27Ac_slide_-60_chr5:35002830	10293	17057	9501	31587	6350	12797	10814	13377	12130	10276	448499769	CACTCCGCCACACTTTGGACGACAGTGCGTACAGACCAAGCAGTTCAAGAAACTCGTGCATAGGATGCTGATGTAAAACCACGCCCAGCTTCGTCTCGCGATGAGTGCGTCAGCTTCCCGTATTTCGCGAGAAGTACA	mm	chr5:35002830	FALSE	1.5437	1.44954	chr5:35002770	chr4:2965174	-87	-	Nop14	0.528986	0.0869565	2.17425	2.45768	1.79802	1.77802	1.59783	1.30243	2.31596	1.78802	0.0220884	0.0220884	0.977912	0.977912	0.162375	0.164489	1	1	FALSE	FALSE	0	0	0	FALSE
mm_Endogenous_chr16:97510545	80	109	110	233	46	138	165	126	124	96	602215013	CACTCTCTTTCTCCATTCCCAGGTCTGGGAGTTGGCTGCAACCCAGGGTGGAGATGATGACAAAAGACGACGACGTCAGGACTGGATTTAGCACCAGCTGCCAAGGCCTTTGTGAATTTAATTTTGGAGGCATCTCTT	mm	chr16:97510545	FALSE	2.52124	1.58615	chr16:97510545	chr21:42436468	-67789	+	Bace2	0.5	0.0217391	1.918	2.50259	2.07548	1.79268	1.71433	2.08158	2.21029	2.05369	0.0140562	0.0281124	0.985944	0.971888	0.130419	0.194577	1	1	FALSE	FALSE	0	1	0	FALSE
mm_Sliding_topH3K27Ac_slide_20_chr9:60685375	6119	11747	7654	18356	5275	5055	6672	5461	7572	11475	1218039610	CACTGACTGTATTGACGTGGTCAGCGTGTTTCACAATGTGCTTGAGTCATTTCCCCAGGAGCCCTGAGTTTAGTTACTCAGAGGGAAGGCATGCATTGACAACGAGTTCTCAGCCCCTTTCTTTCACCCAGCTGTCAG	mm	chr9:60685375	FALSE	0.852914	0.810309	chr9:60685395	chr15:70994836	-592	-	ENSMUSG00000052143	0.5	0.0217391	1.80254	1.71928	0.636033	0.650013	1.14346	1.26306	1.76091	0.831612	0.901606	0.0843373	0.0983936	0.915663	0.979189	0.352047	1	1	FALSE	FALSE	0	0	1	FALSE
hs_Sliding_topH3K27Ac_slide_80_chr4:41541220	940	1085	874	1662	628	957	1080	972	1249	1634	1269594924	CACTGAGCTACAGCCGTTTTCTTCATGGTGCTGAATAGACCAAATGTCTCAGGAGTCTGAAACTTCTCTCCTGCCACTCCCAGAGTGGCTGATTCAGCAGTCCCGGGAGAAGGGGTTTGTCCTGTGCTGCGCGGGTGG	hs	chr4:41541220	FALSE	0.969557	0.938649	chr4:41541300	chr5:67290445	NA	+	ENSG00000064042	0.550725	0.0289855	1.39846	1.30756	0.845612	0.812487	1.47547	1.21147	1.35301	0.954103	0.714859	0.263052	0.285141	0.736948	0.912309	0.603625	1	1	FALSE	FALSE	0	0	0	FALSE
mm_Sliding_topH3K27Ac_slide_20_chr11:68908505	762	545	1189	1530	508	944	884	1091	1510	1232	1863579839	CACTGATTTAGGCAGGGCGGGGTTGTCTCTGCAGCCAGTAAAAATGTTGAGAGTGGGTGGGGGTGTGGCTTCCGGTCAGATGTCCAATCAACGAGTTGGGGCGCCCCCGCCCTCACGTGGCTCTATCACTACCGGTTG	mm	chr11:68908505	FALSE	1.05255	1.50508	chr11:68908525	chr17:8059884	-173	+	ENSMUSG00000020893	0.586957	0.0507246	0.868385	1.48805	1.1063	1.20953	1.47861	2.0374	1.75801	1.27881	0.172691	0.0863454	0.827309	0.913655	0.532657	0.352047	1	1	FALSE	FALSE	0	0	0	FALSE
mm_Sliding_topH3K27Ac_slide_-80_chr14:74087735	446	145	150	689	310	718	816	790	946	1201	1564680937	CACTGCAGACATGTCTTGCTCTCTATTCGTGTCTTGGTGATGTTGCTTTCTTACTGCTGGGCCTGGTTTATTATTAGCACAGTACATGCGGGCCACACTGGCAATTTGTGTCTTAGGAGGTTTCCGTTTATAAAAATA	mm	chr14:74087735	FALSE	0.996664	0.967255	chr14:74087655	chr13:48459866	-44248	-	uc007upz.1	0.434783	0.0217391	0.378605	1.09812	0.863163	0.898435	1.4182	0.4212	0.919699	0.98196	0.672691	0.684739	0.327309	0.315261	0.908104	0.889409	1	1	FALSE	FALSE	0	0	0	TRUE
mm_Endogenous_chr12:114047060	131	134	135	180	83	141	70	154	137	67	1882603715	CACTGCAGAGCTGCCAGCATCCTCCAGTCCGCAGCAACATAAGTGGTAGTCGGGAGAGGATGGGCATGGGCGGGGCGCTGTTGGCCACGCCACACGGTGGCGTGCTGACGACACTTAAAGCACGCCGGAAGCCTGCTG	mm	chr12:114047060	FALSE	1.53259	2.51095	chr12:114047060	chr14:105452028	-125	+	BC022687	0.637681	0.0724638	1.30679	1.07148	3.03847	3.13941	1.55581	1.41584	1.48583	3.08894	0.00200803	0.178715	0.997992	0.821285	0.0259157	0.501658	1	1	FALSE	FALSE	0	1	0	FALSE
mm_Endogenous_chr15:97998220	12708	16119	12274	22141	1536	10051	8015	10262	8784	4116	614167902	CACTGCAGCTTCGGAACCCTGTTCTCTTTCTTCCTCACTTCCTCGTTGCCATGGAGACACACGTCATTTACGTGCCGTGCGTCGCCTTGGAAACGGGGGAGCATCCGCGGCGCCGCCGGGAGACCCGCCCCTGCCTCT	mm	chr15:97998220	FALSE	2.85647	2.62065	chr15:97998220	chr12:48577365	-16	+	Ccdc184	0.630435	0.101449	8.49428	7.12192	3.5257	3.40533	8.15548	6.95591	7.8081	3.46551	0	0	1	1	0	0	1	1	TRUE	TRUE	2	0	0	FALSE
mm_Sliding_topH3K27Ac_slide_40_chr6:149049100	163	244	251	516	199	129	175	224	209	320	354295152	CACTGCGTCACCAAACCCGTCAAATGGGGGCCATGCTCCTCCAGTGACACCTCGGCAGTGATTCACGGCGCGCCCCTCTTGGGGAGGATTGTCCAACTACATCAACTCAGGAACCAGGCAGGGGTATCAACAAAGCAT	mm	chr6:149049100	FALSE	0.802213	0.802027	chr6:149049140	chr12:31742875	-880	-	ENSMUSG00000030313	0.572464	0.0434783	0.992468	1.28111	0.582038	0.956094	0.807417	1.09794	1.13679	0.80212	0.921687	0.457831	0.0783133	0.542169	0.986331	0.762978	1	1	FALSE	FALSE	0	0	0	TRUE
mm_Sliding_topH3K27Ac_slide_-20_chr19:5822375	29	135	30	348	73	222	921	201	966	752	1512427005	CACTGCTTCCTTTTCTGGAGTTAGGTACAACTATAAATATCGGTGACGCAGCTAGAGATGACTGTGACTGAGGCTCCCAAGCCTGCGTCAGTGATTGTCACCAGCTGTGGGTGGCTTCCGACAGCGCTAAAATGTGTG	mm	chr19:5822375	FALSE	1.79657	1.57744	chr19:5822355	chr11:65239746	19664	-	Malat1	0.507246	0.0362319	1.49689	2.35531	0.426232	0.365074	0.391596	0.357732	1.9261	1.687	0.0341365	0.064257	0.965863	0.935743	0.221115	0.326851	1	1	FALSE	FALSE	0	0	0	FALSE
hs_Sliding_topH3K27Ac_slide_60_chr9:104296048	524	229	345	923	379	1130	726	1038	741	815	83520583	CACTTCCGCCCGGCGGGGTCTCATAGTCCTATGGGCTGGGTTGAAGCCACTTCCTTTTTTCTTTCCCTTTTTCCTCTCCGTGGCCCCGCCTCCCGGAAGTTCTGCCTTGTCTCCGCCGCGGGTCAGGGGTGAGAGCTG	hs	chr9:104296048	FALSE	1.30671	1.11649	chr9:104296108	chr4:49644870	NA	+	RNF20	0.615942	0.0652174	0.489075	1.20324	2.00185	1.73957	1.36287	0.79239	1.07763	1.87071	0.0200803	0.508032	0.97992	0.491968	0.157029	0.790247	1	1	FALSE	FALSE	0	0	0	FALSE
hs_Sliding_topH3K27Ac_slide_40_chr12:48577365	338	657	365	745	40	169	216	351	175	109	2054593033	CACTTCCTGGTTACCATGGAGACACACGTCATTTACGTGCCGTGCGTCGCCTTGGAAACAGAGGAGCATCCGCGACACCCCCGGGAGACCCACCCCAGCTGCTGCTGCCACACTCGCGGGCGCTGCCCGGTAATGGCC	hs	chr12:48577365	FALSE	2.90689	1.97153	chr12:48577405	chr15:97998220	NA	+	CCDC184	0.644928	0.0869565	13.2949	9.20211	2.23857	4.39828	8.32952	7.94314	11.2485	3.31843	0.00200803	0	0.997992	1	0.0259157	0	1	1	FALSE	FALSE	2	0	0	FALSE
mm_Endogenous_chr13:75227245	390	323	224	1296	454	658	1179	836	1502	1220	1250612496	CACTTCTCCACCCCGCCGGGAATACCATCCAGTTCTCAGTCCAGGTAGATCTGACGTCAAGAGATGGCTTTCGTCGATTTGACGTGTAAACACTCATTTCTATTCTGGTTGGTAAGGCTGGGGCTCCACTCAGTCGGG	mm	chr13:75227245	FALSE	1.41761	1.51183	chr13:75227245	chr5:95769021	-28	+	ENSMUSG00000021587	0.521739	0.0507246	0.575872	1.41039	0.778713	0.935942	0.846783	0.429488	0.993133	1.46472	0.0823293	0.616466	0.917671	0.383534	0.376849	0.861697	1	1	FALSE	FALSE	0	1	0	FALSE
hs_Sliding_topH3K27Ac_slide_-80_chr1:61577384	39	53	38	100	59	121	208	143	177	258	309379140	CAGAAAAGGAGATTGTTGTGCATTCTATTAAATACTGCCAGTATGATTAATTTAAAGGGTTACATTTTATTGAACCCTGGTGTAGATGTTCTTTGTCAACCCACATTCACAGCTAGTTAGAGTGTGTGTAGCATTTAT	hs	chr1:61577384	FALSE	1.18262	0.842454	chr1:61577304	chr4:97473040	NA	+	ENSG00000270742	0.347826	0	0.727116	0.837412	0.677138	0.75704	0.651593	0.560649	0.782264	1.01254	0.61245	0.783133	0.38755	0.216867	0.888931	0.92198	1	1	FALSE	FALSE	0	0	0	TRUE
mm_Sliding_topH3K27Ac_slide_-60_chr6:134836725	108	198	93	230	67	154	167	143	231	256	64623269	CAGAACATGACTATTGGGATAATTCAAAATTAAATATAGATTTCGCTTGGGATCTGTTTTAGCCAGGCAAGCTGACTCAATCTTCTAGTAGCGTCAGCTGAACAACATTTGTAGCCCAGCAGACTACTGACATCATTT	mm	chr6:134836725	FALSE	0.956926	1.10806	chr6:134836665	chr12:12836316	-1198	-	Gpr19	0.391304	0.0144928	2.39205	1.69607	0.868544	0.762954	1.58896	1.20828	2.04406	1.03249	0.560241	0.0502008	0.439759	0.949799	0.858236	0.295102	1	1	FALSE	FALSE	0	1	0	FALSE
mm_Sliding_topH3K27Ac_slide_20_chr10:34001950	97	92	38	118	50	674	307	637	372	121	1165605987	CAGAAGCCAAACAAATACGGAAGTCACGAGCTGAAGAACCAATCAGGTGCGCTGCAGGTTCTCGCGAGACTTGCGGGCTGTGGCTCTGGCGTCACTGCGCTGGAGAGAGCGAGGGGCGGAGCTGGGGTTGCGGGGGAC	mm	chr10:34001950	FALSE	3.72182	3.77529	chr10:34001970	chr6:116601130	-5	+	Tspyl1	0.623188	0.0797101	1.48935	1.16601	8.0424	7.19046	1.91234	0.661565	1.32768	7.61643	0	0.2751	1	0.7249	0	0.603625	1	1	TRUE	TRUE	0	1	0	FALSE
mm_Sliding_topH3K27Ac_slide_20_chr14:68701850	614	956	1094	1862	959	1776	1587	1801	2126	1974	1817872989	CAGAATCCTCCCCTTGGCTGCAGCAACGCGCTGCCCCCACTGGCCTGCGCACGGCGATCGATCACAGTCTGCGTCAGAGTCCCGGCGTATAAATAGAGGTGGCAGGACCGCGCCGAGCCGCACACAGCCATCCATCCT	mm	chr14:68701850	FALSE	1.17932	1.32254	chr14:68701870	chr8:24814201	-29	+	ENSMUSG00000022055	0.644928	0.0942029	0.806898	0.959295	1.29899	1.24615	0.631122	0.99302	0.883097	1.27257	0.180723	0.720884	0.819277	0.279116	0.544707	0.909709	1	1	FALSE	FALSE	0	0	0	TRUE
mm_Sliding_topH3K27Ac_slide_20_chr16:90220745	271	367	356	724	346	439	432	467	484	587	1703404883	CAGACACAGTGGGTTCAGACCTTCCAGGCGCGCACGCGGGCCTCGTGTTCTCGGTTTCCGCGGCGACTCGGCCGACGTCACAGTTAGAAGACAATAGCGACTTTCCCCGCTCAGGCTCCTCGGGAACTTTCTCAGTCC	mm	chr16:90220745	FALSE	1.07956	1.01251	chr16:90220765	chr21:33031728	-201	+	Sod1	0.615942	0.108696	0.858558	1.03384	1.07979	1.08663	0.77207	0.895639	0.946199	1.08321	0.457831	0.666667	0.542169	0.333333	0.808506	0.885022	1	1	FALSE	FALSE	0	1	0	TRUE
mm_Sliding_topH3K27Ac_slide_-20_chr14:64987340	454	2677	480	4718	378	46	159	87	212	81	699489282	CAGACCAGTGACTCATCCTTCTGTCAAGAAAGTGTTAACTGGACAAAAAGAATTTGACTCACACAAGTTCTTGGTCTGAGTCATGAAGACAAACCTCACCAGTGATTTCACACTTGTTATATTTAGACTTTTATGACT	mm	chr14:64987340	FALSE	2.87948	3.21398	chr14:64987320	chr8:10009864	-48474	-	uc007uig.1	0.376812	0	5.7324	6.16676	0.819944	1.46702	1.18393	1.10537	5.94958	3.04673	0.00200803	0	0.997992	1	0.0259157	0	1	1	FALSE	FALSE	0	0	2	FALSE
mm_Sliding_topH3K27Ac_slide_-80_chr3:120995025	8383	6831	10981	13253	3524	11880	11566	11099	11289	10422	1186871753	CAGACTCTTGATCGTGGCTGGATCCGGTAAGTATCCGGGCGGAGGCCGACGGTCTTGAGTTAGGCACTACAAACCCCAGAATGCATCGCGACTCTCTTCGCCCTTCTTAGCGCCTTTAGGAGCGCTGCATGCTGAGAT	mm	chr3:120995025	FALSE	1.62792	1.33014	chr3:120994945	chr1:95538196	131	+	Alg14	0.565217	0.0797101	1.56902	1.8581	1.6458	1.45457	2.34491	2.71247	2.52869	1.55019	0.0542169	0.0120482	0.945783	0.987952	0.294504	0.106055	1	1	FALSE	FALSE	0	0	0	FALSE
mm_Sliding_topH3K27Ac_slide_-40_chr1:23386900	78	106	156	243	143	468	288	432	263	335	1853837833	CAGACTGGCATCATCTAAGCAGCTTTCACGCATTTCTGAAGTGGTGTGATTTCTCACTCTTACTACAAGTACAGAGATACTTTAACACCCAGCCCTCCGCTGTTTAACAGTCGTTACACTGTCATGTTACATAAGCAA	mm	chr1:23386900	FALSE	1.2611	0.964059	chr1:23386860	chr6:72001976	-3194	-	Ogfrl1	0.427536	0.0217391	0.599997	0.839579	2.01703	1.76133	0.537678	0.949615	0.743647	1.88918	0.0180723	0.815261	0.981928	0.184739	0.147019	0.928905	1	1	FALSE	FALSE	0	1	0	FALSE
mm_Endogenous_chr6:30522920	569	1621	583	1927	327	497	642	560	784	697	1864442727	CAGAGCCATTTACTCTGTCAACAGGTCCTTCAGCCCACATCCCTCTCCAGCAGCTCCTCCGGTATTCACTCGCGTCAAAGGGATGACGCACGTGACAGAGTCGAGTGCGGATTCATTTGGGCTGTCACCTAGCAACGC	mm	chr6:30522920	FALSE	1.35115	1.38126	chr6:30522920	chr7:129937602	-3115	-	ENSMUSG00000086854	0.557971	0.057971	4.0125	2.91156	1.02952	1.09738	1.71525	1.55196	3.46203	1.36621	0.118474	0.0060241	0.881526	0.993976	0.44793	0.0847571	1	1	FALSE	FALSE	0	0	0	FALSE
mm_Sliding_topH3K27Ac_slide_40_chr8:128082760	64	47	78	139	54	124	70	164	99	96	59372584	CAGAGCCCCTGGCTGGCCAGCTGCCAGCATGAAACACACCCACCGCTTTCTCTAGCAGGGAAACAATATTTTGGCACACGGCCAGTTTCAGAGCCCGTCAAATGCAAGCTTCGCTGTTAACGTTTTCTAATTCAGTGA	mm	chr8:128082760	FALSE	1.06962	1.26636	chr8:128082800	chr1:232756476	-10816	-	uc009nyf.1	0.514493	0.0362319	0.704504	1.27178	1.86493	2.33332	1.16829	1.25736	1.21282	2.09913	0.0140562	0.383534	0.985944	0.616466	0.130419	0.708068	1	1	FALSE	FALSE	0	0	0	FALSE
mm_Sliding_topH3K27Ac_slide_60_chr10:127963245	559	480	436	707	452	672	919	885	1100	1221	1670158366	CAGAGCCGCTACTCTAATTACTGAGTTCAGAGTGAGCTAGAGTTGAGGGTGTATCTCTCCACACGTTCAAATGGTTTGGCAGGGTTTGGTCTGAATCTTAAATATTCTTTGTCAACTTTCCCAGCGTTTGATACTCAG	mm	chr10:127963245	FALSE	1.10408	1.10629	chr10:127963305	chr12:56521656	439	-	ENSMUSG00000025366	0.434783	0.0217391	0.859572	0.772809	0.79463	0.989988	1.21909	0.839667	1.02938	1.10519	0.399598	0.560241	0.600402	0.439759	0.756241	0.820174	1	1	FALSE	FALSE	0	0	0	TRUE
mm_Sliding_topH3K27Ac_slide_40_chr1:55109510	663	1363	724	1689	571	702	985	617	1255	686	334960150	CAGAGCGTGTCCCGGAGATCCGCGCCCCGATTGGCTGTCCCGAGGCGGCACTGGACACGTGCGTCAGCCTAGCGTCAGCGTGGCGTCATGGGGTTGGGAGGGACTTAGTGGGAAGAGGCGTGTCCAGCTGCTCAGAGG	mm	chr1:55109510	FALSE	2.10627	2.24653	chr1:55109550	chr2:198318048	-23	+	Coq10b	0.666667	0.0942029	1.93214	1.46145	1.47749	1.22847	1.14457	1.10373	1.6968	2.1764	0.0100402	0.0923695	0.98996	0.907631	0.106382	0.359529	1	1	FALSE	FALSE	0	1	0	FALSE
mm_Sliding_topH3K27Ac_slide_-60_chr7:16683580	82	69	136	109	31	57	43	79	64	95	1212172742	CAGAGGGAGTAAGAAGGTTCGTTTTCACTGCACAGTTTTTTCCCAAGTGACTATGACGTAAAGCGAAACAGGAGGCGGAGCTAAACTGCTGGGTCAGTCAAACCTGGAGCATGAACCTAGAGGCGTCACATGAGCGCC	mm	chr7:16683580	FALSE	0.663967	0.827274	chr7:16683520	chr19:48018701	-346	+	ENSMUSG00000006024	0.507246	0.0434783	1.80164	1.73722	0.866288	1.13581	2.60745	3.81888	3.21317	1.00105	0.638554	0.0060241	0.361446	0.993976	0.898186	0.0847571	1	1	FALSE	FALSE	0	1	0	FALSE
mm_Sliding_topH3K27Ac_slide_-20_chr12:40949955	923	1079	731	1165	491	190	212	254	237	298	628815650	CAGATCTCCCCACCGCGGCGTCCACTGGGGCGGTGCCTGCATTCGGACTCCCATTCCCAGAGCCTCAGTCTGCCCTCGGTGCCTGGGCTGCTATGCCTTAGGGCCGCGTGGAGCTTTGGGAGATGTAGTTAGCGAGAG	mm	chr12:40949955	FALSE	1.04357	0.976618	chr12:40949935	chr7:112090356	-35	+	Gm7008	0.644928	0.0652174	1.77877	1.17229	0.920553	1.16418	1.85304	1.29597	1.5745	1.04237	0.536145	0.134538	0.463855	0.865462	0.848587	0.424903	1	1	FALSE	FALSE	0	0	0	FALSE
mm_Sliding_topH3K27Ac_slide_-100_chr18:67697035	329	369	378	700	332	302	434	353	466	498	551127658	CAGATGATTACAATGCTCCTCAGTGTATGAGAGACAGATGTCTGTGGCTTTATTCCTCTGAATCTATTCAAGCAGCAATCGGATCGCTAACATGCATCTCAGTGTGAGTTAACATGTAGTCTGCACTATGTATGACAC	mm	chr18:67697035	FALSE	1.27839	1.14908	chr18:67696935	chr18:12521000	-11992	-	Spire1	0.42029	0.0144928	0.899638	1.04172	0.875566	0.968161	0.976835	0.991089	0.983962	1.21373	0.240964	0.630522	0.759036	0.369478	0.622015	0.872815	1	1	FALSE	FALSE	0	0	0	TRUE
hs_Sliding_topH3K27Ac_slide_-80_chr10:111981758	1552	1510	2043	3163	784	86	106	92	111	135	1137249886	CAGCACCTGAGTCGCTTGGTGCGTTTCCGTGTGGTTGGGATGTCAGCCGGCAGCCCTGGCGACAGGAGCCCTGGGAGGCGGCAGCTACCTCTCGGGTTTAGCATTACGTCATCCCTTCTAGACCCAAATTTATCTCGG	hs	chr10:111981758	FALSE	1.15179	1.00968	chr10:111981678	chr19:53400280	NA	+	ENSG00000119950	0.594203	0.0652174	1.55898	1.99331	0.919763	0.9308	1.95137	2.26836	2.10986	1.08073	0.463855	0.0421687	0.536145	0.957831	0.808958	0.259436	1	1	FALSE	FALSE	0	1	0	FALSE
mm_Sliding_topH3K27Ac_slide_40_chr4:97671150	199	256	292	287	88	144	119	213	109	158	2019490754	CAGCAGATGAATTGCCCTGGCTCTGCCACAAAGCCTGGCTACCCGATGGACTTCGGGGTTCCCAAGTTGTTTGTCAATGGAGAGTGGCAGTGAATGGAACGGGCCTGTGCCTCAGCCTGGCATGAGGTGGCACCCTAG	mm	chr4:97671150	FALSE	1.10482	0.847154	chr4:97671190	chr1:61803966	93507	+	ENSMUSG00000028565	0.57971	0.0217391	2.35471	1.61135	1.31588	1.8413	2.22912	2.88841	2.55877	1.57859	0.0481928	0.0120482	0.951807	0.987952	0.275284	0.106055	1	1	FALSE	FALSE	0	0	0	FALSE
mm_Sliding_topH3K27Ac_slide_80_chr18:23602865	156	119	126	515	150	317	366	302	479	455	754434966	CAGCATATGTTGCCATTTGTCTCACGGTGACAGCTCACTTCATTCATTTTCAGAAAGGAAAGAGATGAAGCCCGTGGGCTTGAATCATTTTGGCTTGCTGGTCTTCTTTATGTAAACACAATGTTGTAGAAGACGTCA	mm	chr18:23602865	FALSE	1.17997	1.29276	chr18:23602945	chr18:32215804	29110	+	ENSMUSG00000024302	0.42029	0.0217391	0.642148	1.69632	1.00591	0.906563	1.02517	0.731204	1.16923	1.23636	0.210843	0.425703	0.789157	0.574297	0.586568	0.740719	1	1	FALSE	FALSE	0	0	0	TRUE
mm_Sliding_topH3K27Ac_slide_100_chr16:20695045	503	408	379	337	226	924	970	1072	1040	644	846432967	CAGCATCCGGAGCCAAAACAAGAATAGAACTGGGAGCTGGGCCTGAAGCAGTTCAGGCTTTGGGCTCTCTGCATCAACACAGCCAGCATGCCTATGATTTCTGTGCTGGGCAAAATGTTTCTGTGGCAGCGCGAAGGG	mm	chr16:20695045	FALSE	2.20947	1.98308	chr16:20695145	chr3:184055300	265	+	ENSMUSG00000050821	0.536232	0.0217391	1.46127	0.736737	2.07156	2.27359	2.19393	1.45979	1.82686	2.17257	0.0100402	0.0742972	0.98996	0.925703	0.106382	0.327844	1	1	FALSE	FALSE	0	0	0	FALSE
hs_Sliding_topH3K27Ac_slide_100_chr3:184055300	388	388	297	598	135	188	205	205	188	268	2100744075	CAGCATCCGGAGCCAAAACAGGAATAGAACTGGGAGCTGAGCCTGGAGCGGTTCTGGGCTTTTGGTTCTCTGCATCAACACAGCCAGCATGCCTATGATTTCTGTGCTGGGCAAAATGTTTCTGTGGCAGCGTGAAGG	hs	chr3:184055300	FALSE	1.12207	0.861422	chr3:184055400	chr16:20695045	NA	+	FAM131A	0.528986	0.0217391	2.32636	2.18856	1.01282	1.04477	2.8331	1.91506	2.37408	1.0288	0.566265	0.0220884	0.433735	0.977912	0.860172	0.164489	1	1	FALSE	FALSE	0	0	0	FALSE
mm_Positive_chr13:114124395	124	448	95	482	70	180	348	223	319	271	1743176139	CAGCATGACGCAGGTTTGTTCTTTTGGTTTCCAGAGATACTAGTAGGTGGCAGCCAGCATTTCTGAGCCACACCCCTCCATCCCTCACGAGTCAGGCGCAGCTATAAATGTACCACTTAACTGATGAAATGATTCCTC	mm	chr13:114124395	FALSE	1.8837	1.44549	chr13:NA	chr5:54144504	-8360	+	ENSMUSG00000021763	0.485507	0.0217391	5.18036	3.40205	0.958991	1.12393	1.74617	1.18137	4.2912	1.66459	0.0361446	0.00401606	0.963855	0.995984	0.232368	0.0770232	1	1	FALSE	FALSE	0	0	0	FALSE
mm_Endogenous_chr19:53400280	209	352	196	945	111	296	551	434	620	486	862031611	CAGCCACCTCTCGGGTTTAGCATTACGTCATCCCTTTAGACCCAAATTTATCTCGGCTGCACACAGCCCCGCAGCTCCCGAGCTGCCGCCGCTGACTTTAGAGCTTACGCACAAAGTTAGACAAGGCTGACTCACTGG	mm	chr19:53400280	FALSE	1.6631	1.56656	chr19:53400280	chr10:111981758	-3622	+	Mxi1	0.550725	0.057971	2.56684	4.2063	0.87936	1.21971	1.85604	1.53707	3.38657	1.61483	0.0401606	0.0060241	0.959839	0.993976	0.24316	0.0847571	1	1	FALSE	FALSE	0	1	1	FALSE
hs_Sliding_topH3K27Ac_slide_60_chr21:42436468	106	102	81	194	88	106	127	104	128	262	1070653501	CAGCCCAGGATCCAGATGACATCAGGACTAGATTCCGAATCAGCTGCCAAGGCTGTTGTGAATTTAATTTCATAGACATTGTTCTGCTAAGTTGATGCCAGGACAGATGATGGGTATGAGAGCAAGAAATGAGATTAG	hs	chr21:42436468	FALSE	0.711057	0.599931	chr21:42436528	chr16:97510545	NA	-	ENSG00000226496	0.434783	0.00724638	0.938204	1.08921	0.584139	0.542169	1.18737	0.801238	1.01371	0.655494	0.973896	0.586345	0.0261044	0.413655	0.991514	0.836975	1	1	FALSE	FALSE	0	1	0	TRUE
mm_Sliding_topH3K27Ac_slide_60_chr11:115794875	100	24	74	281	83	172	166	173	149	203	1042467369	CAGCCCTTTTGATTGGTTGTCATTCGGGCGCGGAGTCTCCTGGGATCCGGAAGAAGTTGGTTTTCTCGCCCCTAAATTGGCTTATGAGTCATAGGCCTGAGCCACACCGCGCTGTGGGAGTAAGATGGCGGGGAAGAA	mm	chr11:115794875	FALSE	1.19954	0.901328	chr11:115794935	chr17:73663335	109	+	ENSMUSG00000020755	0.550725	0.057971	0.234052	1.67271	1.22333	1.164	1.18764	0.776091	0.981866	1.19366	0.269076	0.63253	0.730924	0.36747	0.651438	0.874537	1	1	FALSE	FALSE	0	0	1	TRUE
hs_Sliding_topH3K27Ac_slide_-80_chr15:78591958	44	59	87	63	222	146	155	166	123	232	554282760	CAGCCTCGGGCCCAACCTCGCTCACTCGCCCTCTGGCCTGGACTGTCAACGGCCCTAATGACCCCAATCCCCAACGGCCCTGCGCTCCAACTCACCACTGCACTGCCAGGCTGCACGTCGGAAGCCGGGCTCCGCGCG	hs	chr15:78591958	FALSE	0.980044	0.651043	chr15:78591878	chr9:54582335	NA	-	ENSG00000140395	0.688406	0.0869565	0.215119	0.14021	0.908607	0.977288	0.195372	0.341134	0.268253	0.942948	0.742972	0.973896	0.257028	0.0261044	0.927499	0.982481	1	1	FALSE	FALSE	0	0	0	TRUE
mm_Endogenous_chr7:99785675	11577	5973	13275	10054	3537	27039	11812	27275	13082	4600	1100722791	CAGCCTGGAGGGCGTGGCGGCGTGGCCGTCACCTTGGAAACGAGTACACTTCCGGCGTGCGGTCACTTCCGTATCCTTTATGCACGCGTCACTTCCCGCTTCCTTCCTTTCACCTTTTTCGGGGTTTAGCCTGTGGAA	mm	chr7:99785675	FALSE	3.76676	3.49228	chr7:99785675	chr11:82904724	23	-	Ankrd42	0.586957	0.0942029	1.3669	1.40441	8.4868	8.09859	3.22645	3.26707	3.24676	8.2927	0	0.0060241	1	0.993976	0	0.0847571	1	1	TRUE	TRUE	1	0	0	FALSE
mm_Sliding_topH3K27Ac_slide_-100_chr3:108059885	730	1603	1533	1363	1060	731	659	1065	971	1357	2002880392	CAGCGAAGAGCTGGGCAGGCGAGCGCGAAGTAAGAGACCGGTGTCCCCCGGCTGCATTTACGCGAGCTGGCGAGACTTACGTCACGATTCCGACAACCCAGTCATCAGGCCAAGTCTTGCAGCCATCCAAAGCGCGGC	mm	chr3:108059885	FALSE	0.712373	0.878683	chr3:108059785	chr1:109969288	-218	-	ENSMUSG00000085102	0.615942	0.101449	1.22407	0.635303	0.777766	1.07194	0.67886	1.25891	0.968886	0.924855	0.767068	0.648594	0.232932	0.351406	0.929525	0.880951	1	1	FALSE	FALSE	0	1	0	TRUE
mm_Sliding_topH3K27Ac_slide_-40_chr7:132851375	307	234	284	607	224	193	179	209	175	245	1254405240	CAGCGATCCGAGGCCTAGGGAGGACTGATGGGGAGTCCCAGCGCTCCGCCGTGACGTCACGCTACCCGAGGGCGGGCTCAATGATCAGAGTTCCTCCTCCATTGGTCCGGAACCCCGTAGTAACCAGGGGAACTGCAA	mm	chr7:132851375	FALSE	1.07174	0.877132	chr7:132851335	chr16:27561403	-94	+	D430042O09Rik	0.630435	0.0797101	0.845566	1.33885	1.13737	1.16515	1.351	1.10365	1.22732	1.15126	0.337349	0.363454	0.662651	0.636546	0.72202	0.68335	1	1	FALSE	FALSE	0	1	0	TRUE
mm_Sliding_topH3K27Ac_slide_60_chr4:13134245	449	503	375	1626	349	257	581	302	671	574	2099911156	CAGCGTGCCGGTGAGACACTCAACAGCGTCTGCGCAGGATGAATCGTGTTCTTTCCCAGTCAGTTGGCTTTTCAAGATCTTTGCTAAAGAAGAGATGCAAAAACTCTCTGGGACTCTTTCATCAGCCATCAAACTTGT	mm	chr4:13134245	FALSE	1.48479	1.4355	chr4:13134305	chr8:93706682	-59832	-	ENSMUSG00000080663	0.471014	0.0362319	1.1666	2.3019	0.646446	0.718617	1.26819	0.93533	1.73425	1.46015	0.0823293	0.0903614	0.917671	0.909639	0.376849	0.356155	1	1	FALSE	FALSE	0	0	0	FALSE
hs_Sliding_topH3K27Ac_slide_-80_chr3:184055300	1132	971	767	1833	721	914	916	1018	964	1166	1316421626	CAGCTAAAGGTCAGTTGTGATGTACATTGCCTGTTGGCACTGTCTAGGGAATGGGCCTCAGCTCCCCGAGTCCCAGAGAGCTTGGCTGAGCCCTGGTGTTCCCACCTCCTCAGAGCCATGAGGCAGGAATGTTCTCCT	hs	chr3:184055300	FALSE	1.15239	1.01525	chr3:184055220	chr16:20695045	NA	+	FAM131A	0.565217	0.00724638	1.09009	1.25608	1.13177	1.19248	1.54766	0.926018	1.23684	1.16213	0.329317	0.35743	0.670683	0.64257	0.721268	0.680186	1	1	FALSE	FALSE	0	0	0	TRUE
mm_Sliding_topH3K27Ac_slide_20_chr9:108551760	4442	4616	4713	4269	2052	5222	4049	5692	4588	4559	4369530	CAGCTCCGGAAGTGTTCTGCGCCGCGCGTCACTTCCGGTAGGGGTCGACCTGCGGTCGCCCTGGAGGCTCCCAGGCTTCTGACGACTGCGTAGTCGGTTGGAATCGCTTCCTCACCATCCTCTAGCGAGAGCCCCTGG	mm	chr9:108551760	FALSE	1.30281	1.2358	chr9:108551780	chr3:48956238	89	-	Arih2	0.652174	0.101449	1.82082	1.02787	1.65378	1.70529	2.13385	1.99931	2.06658	1.67954	0.0341365	0.0461847	0.965863	0.953815	0.221115	0.278162	1	1	FALSE	FALSE	0	0	0	FALSE
mm_Sliding_topH3K27Ac_slide_-20_chr1:36360450	15176	23578	13914	58202	9577	16464	16700	16095	27369	22762	302939523	CAGCTCCTGGCGCGCCTCTCCCGCTCTGATGTAAGCTGATATTTTAATTCTCTTACAAGGAATGGTGTTTAGAGAAATGACTTAACCGGATTACTCATCGTCGATAATGACTTGGCCCAGCTCCGAGGCTATTCCTAG	mm	chr1:36360450	FALSE	1.07624	1.47653	chr1:36360430	chr2:97197950	-4167	+	Arid5a	0.471014	0.0507246	1.99277	3.00261	1.04433	0.965791	1.56204	1.26468	2.49769	1.27638	0.176707	0.0120482	0.823293	0.987952	0.540191	0.106055	1	1	FALSE	FALSE	0	2	1	FALSE
mm_Sliding_topH3K27Ac_slide_60_chr1:13178725	1397	2269	1770	4410	1762	2184	2719	2346	3266	3052	1093840127	CAGCTCTCCGAGCACACACATGCTCTCCCTGTTGAAAGGTCTCCAGTTAAGCCGTAAGCCACTAGATCCCGGAGCTTCCTCTCTGGCACGCTGACTTAGTACTCAGCTTGCACAGGCGCTTCCTCAATGCACTCCACT	mm	chr1:13178725	FALSE	1.30685	1.31409	chr1:13178785	chr8:71085226	37746	-	ENSMUSG00000005886	0.550725	0.0362319	1.04234	1.23658	1.03319	1.0499	0.781545	0.874433	1.13946	1.31047	0.146586	0.457831	0.853414	0.542169	0.486213	0.762978	1	1	FALSE	FALSE	0	0	0	FALSE
mm_Sliding_topH3K27Ac_slide_-80_chr11:98448655	2074	2051	1979	2386	807	1257	1218	1320	1253	1240	1913184860	CAGCTGTAACAAACCAGCGGCGGTGGCTACCCCGCTGGCAGCTCTGGCCGAATCAGCTCCCCGAGCCGGGGCGGTGACGTCACTACCACGCGCCTATCACGTTGTGCCTCTTGGGAAGTGTAGTTTCTAGGCTGCCTC	mm	chr11:98448655	FALSE	1.44088	1.24086	chr11:98448575	chr17:38083947	-187	-	ENSMUSG00000038150	0.630435	0.0797101	2.05718	1.46079	1.46361	1.45397	2.53337	2.13467	2.33402	1.45879	0.0823293	0.0220884	0.917671	0.977912	0.376849	0.164489	1	1	FALSE	FALSE	0	1	0	FALSE
mm_Sliding_topH3K27Ac_slide_-100_chr15:72682960	1676	2141	1922	3851	2439	1565	1465	1975	1842	2415	115396035	CAGGAACACTGGAGAGAGATAACAGCTACTCCCAGCAAAGGGCCAGCCACTTCCCACATCCACATGATAGTCCTGTGCTTTGTCCACTCTATGCAAGCAATCGTCTCCAGTGTTCCTGAGGCTTTATTCACACTGTCC	mm	chr15:72682960	FALSE	0.889861	0.936624	chr15:72682860	chr8:141152802	42006	-	Peg13	0.507246	0.00724638	0.710533	0.780105	0.935639	1.117	0.67737	0.685963	0.745319	1.02632	0.580321	0.815261	0.419679	0.184739	0.873408	0.928905	1	1	FALSE	FALSE	0	0	0	TRUE
hs_Sliding_topH3K27Ac_slide_-20_chr5:136482371	796	991	946	1405	313	927	1054	1036	1048	803	180881686	CAGGAACATTTATTGCAGCTTGTCTGTCCCCATGGTAACCCGTGCATGCATCTTGCCTCCCTTGTCTCCAGAGAGGCTTGTTCACCAGCTGACGACAGAGCCTCTCAGAATATAAAATAGAAGATTCTGCCCATAGGA	hs	chr5:136482371	FALSE	1.92543	1.60265	chr5:136482351	NA	NA	-	ENSG00000152377	0.485507	0.0144928	2.56277	2.2178	1.66677	1.76217	2.50687	2.63091	2.56889	1.76404	0.0261044	0.0120482	0.973896	0.987952	0.185541	0.106055	1	1	FALSE	FALSE	1	1	0	FALSE
mm_Sliding_topH3K27Ac_slide_-60_chr5:65590880	2510	2366	3148	5449	1832	795	1073	934	811	1632	1421136618	CAGGAAGTTGACCAGCCCTCGTAGCATTCAACTTCCCGGAGCTTAGCTCCACCTCCATCACGTGACTCTACCCACCCTGCCCATCTCTCTCAAAGGAGGGCTCCGGGGGCAGCTCCGCCCCACGCTCGCTGATTGGTC	mm	chr5:65590880	FALSE	0.964454	0.61023	chr5:65590820	chr4:39184054	-174	+	Wdr19	0.615942	0.0507246	1.04537	1.46954	0.703329	0.78168	1.35055	1.49578	1.42317	0.787342	0.933735	0.206827	0.0662651	0.793173	0.988136	0.526735	1	1	FALSE	FALSE	0	0	0	FALSE
mm_Endogenous_chr11:116029625	433	313	539	780	88	247	102	321	237	149	1194217954	CAGGACTTGACCGGAAGGACTACATCTCCCAGCGTGCCCCGCAGCGGGGGCAAGGCGTCTGTTGGATGCTCCGCGAGTTGCTAGGAGCTGTCTCAACGTCACTCCCGTGAAGCGCGGGGAAAGCATCTCCCGACTAGG	mm	chr11:116029625	FALSE	1.00419	1.95324	chr11:116029625	chr17:73937282	133	-	Fbf1	0.630435	0.0869565	2.879	4.37928	2.39344	2.94253	4.8503	5.33169	5.091	2.66798	0.00200803	0	0.997992	1	0.0259157	0	1	1	FALSE	FALSE	0	0	0	FALSE
mm_Sliding_topH3K27Ac_slide_40_chr11:88816745	1970	1800	3231	3516	1336	639	693	639	837	2511	1756898361	CAGGAGCCAAAGGCCATCGCGTGACGGCTTGCGCGGGGACTGGGCGGAGTCAGGGGCGGAGCCTAAGTGGGCCCTGACACTCCTAAGGATTCCGCGCTCCCTCTGCCGGTCGGACCCACCCAGGACCTCCTACAAAGG	mm	chr11:88816745	FALSE	0.404845	0.409328	chr11:88816785	chr17:55055427	69	-	Scpep1	0.673913	0.0797101	1.09055	1.30027	0.367422	0.347581	1.45353	2.10518	1.77935	0.407086	0.995984	0.0803213	0.00401606	0.919679	0.998602	0.344248	0.689357	1	FALSE	FALSE	0	0	0	FALSE
mm_Sliding_topH3K27Ac_slide_-20_chr16:97510545	520	578	453	1316	401	541	678	553	1083	887	427521666	CAGGATCCACCGTGAAGCCCCACTCTCTTTCTCCATTCCCAGGTCTGGGAGTTGGCTGCAACCCAGGGTGGAGATGATGACAAAAGACGACGACGTCAGGACTGGATTTAGCACCAGCTGCCAAGGCCTTTGTGAATT	mm	chr16:97510545	FALSE	1.12126	1.49933	chr16:97510525	chr21:42436468	-67829	+	Bace2	0.543478	0.0289855	1.16671	1.62145	0.880613	0.851538	1.27827	0.983361	1.39408	1.3103	0.146586	0.2249	0.853414	0.7751	0.486213	0.55386	1	1	FALSE	FALSE	0	1	0	FALSE
mm_Sliding_topH3K27Ac_slide_80_chr6:124414800	372	508	492	486	329	524	411	605	748	1040	775394472	CAGGCAAGGATTGATGGGGCCGCTGGCCAATTAGAAGACTGAGGGCACCAGGTGCTGCAAGGGGGGGTAGGGAACCAATGCGACTGGGGAGCAGGGGCGGGAGAATGTGTTAGGGCTTTTTCCCCTGGCTGCAGTTTG	mm	chr6:124414800	FALSE	0.579709	0.883204	chr6:124414880	chr12:7282962	158	-	Clstn3	0.601449	0.0217391	1.24982	0.729846	0.72746	0.794556	1.11458	1.30175	1.20817	0.761008	0.947791	0.38755	0.0522088	0.61245	0.989773	0.708068	1	1	FALSE	FALSE	0	0	0	TRUE
mm_Sliding_topH3K27Ac_slide_-40_chr6:21899430	200	238	235	455	139	187	161	187	179	234	1208124584	CAGGCGCATACAACTCCCGTCATCCCCCATGTAAGAAATCAACAAATAAACAGAGGCACCGCATTTCGGATTCTGGCGTGCCCGTTTCGCGCAGGCGTGTGGTTTCTGTAGTTGCCACTCCAAGAGACACCCTCACTA	mm	chr6:21899430	FALSE	1.00928	0.939356	chr6:21899390	chr7:120590634	-220	+	ENSMUSG00000029670	0.528986	0.0652174	1.38593	1.61729	1.15382	1.09151	1.41833	1.47168	1.50161	1.12266	0.373494	0.174699	0.626506	0.825301	0.742017	0.501658	1	1	FALSE	FALSE	0	0	0	FALSE
mm_Sliding_topH3K27Ac_slide_80_chr16:98183685	3359	10197	4071	10937	3318	2625	3161	3174	3653	3630	740683735	CAGGCGCCAAGCCCCTTTCCGCTCACACTCGGCTCGCGCAACCCGCAGCCTCCACTGCCGCTGTGATTCCATCCATCTTGAATTTGACGTCATCCCACACCAGGGATGAGGTCATCGCAAGCAGCGCTCGTCACGTGC	mm	chr16:98183685	FALSE	1.27738	1.23576	chr16:98183765	chr21:43430367	59	-	Zbtb21	0.615942	0.0869565	2.48757	1.62859	1.04408	1.19427	0.997923	1.06803	2.05808	1.25657	0.192771	0.0481928	0.807229	0.951807	0.56322	0.28476	1	1	FALSE	FALSE	0	2	0	FALSE
mm_Sliding_topH3K27Ac_slide_-60_chr11:88218720	405	245	247	999	465	1258	1132	1338	1675	2209	1892679500	CAGGCGTGTGTGATGTGTAGGGCTCGGGATCTCTCCCTCTCCCACGTAAACACGGGATTCGTTTATTAAATGCCTCTCTGCCATTTCCTTTTTTGCCTTCATCCTGCTTGTTTAATATTGCATTTGACATTCTCATTT	mm	chr11:88218720	FALSE	0.751714	0.931133	chr11:88218660	chr17:55682456	-28416	-	ENSMUSG00000084411	0.442029	0.0362319	0.426474	1.06146	0.822235	0.8273	0.85855	0.462384	0.743967	0.841424	0.895582	0.815261	0.104418	0.184739	0.976353	0.928905	1	1	FALSE	FALSE	0	0	0	TRUE
mm_Sliding_topH3K27Ac_slide_60_chr2:71848060	1534	2049	1563	3084	1222	1703	1667	1894	2191	2387	1526887412	CAGGGATGCCAGGATGCTTGGGCGGAAGAGAGCCAGCTGTGCCTAGTGACGTCAGCATTCCCCCCTCTCACCCAAGGCAGGGCTGGCTGTTTCTGCCTGCAGTGCTGATTCTGATAATCTTGGTTCCCTTCTGAGAAC	mm	chr2:71848060	FALSE	1.02444	1.12715	chr2:71848120	chr2:173633308	10331	-	ENSMUSG00000088297	0.572464	0.0144928	1.35722	1.24691	1.03009	1.08375	1.23742	1.11339	1.30206	1.07579	0.471888	0.291165	0.528112	0.708835	0.817351	0.613609	1	1	FALSE	FALSE	0	1	0	FALSE
mm_Sliding_topH3K27Ac_slide_-100_chr5:86602020	157	98	138	162	64	188	163	184	204	133	1616877954	CAGGGGGAGGAGCTGGGGAAAAGTACGCCCAGGACAGGGTTTCCAGTCAGCCCCTGGGACACCTGACTTCCGGTTGGGGCGGGGCAACGGGGCGCGCTTCCTTGCAGGTGAGGGGAGTGCCTACGTGAAGGCTGCTGA	mm	chr5:86602020	FALSE	1.79779	1.88352	chr5:86601920	chr4:68567106	-8	-	ENSMUSG00000035898	0.65942	0.0507246	1.23944	1.25062	2.04088	1.88959	2.41815	1.87697	2.14756	1.96524	0.0160643	0.0421687	0.983936	0.957831	0.137528	0.259436	1	1	FALSE	FALSE	0	0	0	FALSE
hs_Sliding_topH3K27Ac_slide_-80_chr14:23352270	373	403	492	688	391	463	387	462	394	581	1293189159	CAGGTCCCTGCCTTCTGTCACCCTGAGCTCCCTTACCCACTGACACCCCCTGCAACCCTTGTCTGTTCTGCCCCTTGACTGTTCTGTCATAACTCAACCAAGCTCTGCAGTGTGTGTGCTCCCAGAGAGAAGCGACAC	hs	chr14:23352270	FALSE	0.977095	0.832747	chr14:23352190	chr14:55094890	NA	+	ENSG00000139890	0.565217	0.00724638	0.834272	0.869366	1.15058	1.0861	0.940363	1.09534	1.01785	1.11834	0.383534	0.582329	0.616466	0.417671	0.752167	0.836459	1	1	FALSE	FALSE	0	0	0	TRUE
mm_Sliding_topH3K27Ac_slide_-20_chr5:137506075	371	518	536	976	287	370	333	309	370	421	1859658366	CAGGTGCAGGCCGGGAGCGACGCTTATCCTCCAATCATTGGACTTTCACCGTCCACCAGACACCCGCCCGCTTCCCCATGAATGAACATTGACGTCAATGGGGCGGGGCTATCCCACGTGACCCCGCGCGCTCCCCTT	mm	chr5:137506075	FALSE	1.16028	1.07923	chr5:137506055	chr7:100808940	-94	+	uc009abl.1	0.623188	0.0869565	1.46092	1.68019	1.26891	1.00249	1.27425	1.62571	1.57056	1.1357	0.35743	0.134538	0.64257	0.865462	0.735808	0.424903	1	1	FALSE	FALSE	0	1	0	FALSE
mm_Sliding_topH3K27Ac_slide_-100_chr19:43526950	2771	1720	1704	4242	2262	258	204	294	309	270	1359450200	CAGGTTCAGGTTGATGGAGAGGGAGAGACCTGGGTAGTCCCTTCTGGAGCTGGATTCCAAGCTATGCAGAGTCAGACCCGCACGTAATGAAGCTCTGCTCTGCTATTTCTGTGGTGTTGCTTAGCAAGCCAAGTTGCC	mm	chr19:43526950	FALSE	1.10833	1.40536	chr19:43526850	chr10:101102134	10721	+	ENSMUSG00000025189	0.528986	0.0144928	0.615482	0.926551	1.37964	1.48726	1.20756	0.655747	0.931652	1.43345	0.0903614	0.676707	0.909639	0.323293	0.391775	0.885678	1	1	FALSE	FALSE	0	0	0	FALSE
mm_Sliding_topH3K27Ac_slide_-80_chr1:97564240	372	393	554	912	416	489	489	631	852	628	480477794	CAGGTTTCTTTTCAAATGTGACACCTTGTGCATTGGAGGTGGCGGTTTCTTCTGCAGCTGGGCTCGGGGGCGTCACTGGCCCTTTCCTCGCCGTAGCAGGGAAACGATAAGCAAGGCCAGCCAATCACCGTGCTGAGG	mm	chr1:97564240	FALSE	1.14222	1.66599	chr1:97564160	chr5:100239047	-91	-	St8sia4	0.572464	0.0507246	0.764678	1.08316	1.12424	1.37237	0.881481	1.15925	1.02036	1.40411	0.0963855	0.576305	0.903614	0.423695	0.396927	0.833385	1	1	FALSE	FALSE	0	0	0	FALSE
mm_Sliding_topH3K27Ac_slide_-20_chr11:97311435	4184	8695	6222	6824	3807	4756	4901	4232	6159	5934	1624324016	CAGTCAGCCAGAGGGTGGGGCCCAGGCATTCCTGTGGTTGGGAGCCAAGGCTGGAGGCCAATCGGGTGGCGGCAGCTGCTGACGCCACCACCGACGCGGCAAGTCCCCTCCACACCCATCCTCCCTCCTCCTACCGCC	mm	chr11:97311435	FALSE	1.21154	1.27455	chr11:97311415	chr17:36621168	-78	+	Arhgap23	0.688406	0.0507246	1.8487	0.88562	1.15719	0.974093	1.08336	1.42268	1.36716	1.24304	0.202811	0.240964	0.797189	0.759036	0.574939	0.570503	1	1	FALSE	FALSE	0	1	0	FALSE
mm_Sliding_topH3K27Ac_slide_-60_chr9:54582335	364	996	828	1757	1100	927	1138	927	1486	1595	1703619991	CAGTCGCCCTCTCGCCCTAGTAGGCAACAGCACCAAAGACCACCATTCCCCAACTCTGCCCAGCACACCAACTCACCACCGTACAGCCAGCCGCACAGCACGCCTGACGTCAGTGGAGCACGACCGTGGCGCTCGTGG	mm	chr9:54582335	FALSE	1.04661	1.14407	chr9:54582275	chr15:78591958	-120	-	uc009prn.1	0.637681	0.0724638	0.732903	0.789169	0.839132	0.793819	0.326191	0.655235	0.761036	1.09534	0.425703	0.799197	0.574297	0.200803	0.781518	0.926906	1	1	FALSE	FALSE	0	1	0	TRUE
mm_Sliding_topH3K27Ac_slide_40_chr1:154615385	640	1282	1020	1981	506	479	931	700	846	956	1658909054	CAGTCTGATTGGCCTTCCGTTTCCCCTGCTTGCTAACTCACCAGTGCTTTCAGAGACTGAGTAGGTATGGATGGTCCAGCCCAGTTTGAATAACCTGTAGGAAATAAAGTAAGCTGCCACCTACAGGTCGTGCGGGTT	mm	chr1:154615385	FALSE	1.42854	1.08669	chr1:154615425	chr1:183602988	-163	+	ENSMUSG00000008475	0.5	0.0217391	2.05077	1.93431	0.723417	1.0001	1.24679	1.75472	1.99254	1.25762	0.192771	0.0562249	0.807229	0.943775	0.56322	0.31382	1	1	FALSE	FALSE	0	0	0	FALSE
mm_Sliding_topH3K27Ac_slide_-80_chr5:67359515	236	183	225	657	290	444	392	432	487	593	1430689642	CAGTCTTGGTTTCTAGTGACGGTCTCGGGGAATATTAAGCGGAGGTTTATCTTCGAGTGACTGGAGTTATTTTTGTTTTCGTCAGCCTGGGACTATTGTAATGAACGCGAAGGCACTGGCAGGAACAAGGCTTTTATT	mm	chr5:67359515	FALSE	0.969691	1.00848	chr5:67359435	chr4:41614621	-299	+	Limch1	0.449275	0.0507246	0.510779	1.11933	1.08103	0.995019	0.80219	0.675373	0.815055	1.03803	0.548193	0.773092	0.451807	0.226908	0.856988	0.921206	1	1	FALSE	FALSE	0	0	0	TRUE
hs_Sliding_topH3K27Ac_slide_60_chr16:68057144	2299	2169	2511	1765	868	1055	644	1156	553	649	876141254	CAGTGACGTCACGGACGCGCCGCGACCTCGCGTACGGTGGCTGGCGAGGCTCAGTACGGTGTGTGGAGCTGGAGCACCGTGAGGAAGAAGCGAGGTTCTTTTTAAGAGTTCAGCTGCGAGGTCTGTAGCTCCGAATAG	hs	chr16:68057144	FALSE	1.4556	1.04634	chr16:68057204	chr8:108535365	NA	+	ENSG00000167264	0.601449	0.108696	2.02264	1.00465	2.34703	2.43285	2.61086	2.51818	2.56452	2.38994	0.00401606	0.0120482	0.995984	0.987952	0.0503181	0.106055	1	1	FALSE	FALSE	0	1	0	FALSE
mm_Sliding_topH3K27Ac_slide_80_chr7:37484275	225	178	165	572	256	283	332	346	451	530	1604320686	CAGTGCAACTTCAGGGATTTGGGGCGGCTTGCCGAGAGAGGACCACATATGGACGTGATGTATTTTGATATGAATAACACTCAGACGTGCAGAGGCTCAGACGCTGCCTGAAGGGGAAGGTTGCTTAGGAGTCCTTTT	mm	chr7:37484275	FALSE	0.918891	1.04495	chr7:37484355	chr19:31839102	1299	+	Tshz3	0.507246	0.0362319	0.562807	1.10394	0.770942	0.891667	0.866375	0.561052	0.833376	0.981918	0.672691	0.761044	0.327309	0.238956	0.908104	0.921206	1	1	FALSE	FALSE	0	0	0	TRUE
mm_Sliding_topH3K27Ac_slide_-60_chr12:53390420	560	453	249	1318	285	514	622	612	849	759	568031082	CAGTGCTGCGCAGTTTATCCCACTTCATTCCTGTTCCCCTGCTTTTCAGCCTTGTTCTGTTTTCCCCCTTTTGAAGTGCATTAGTTACCATGGAGACAGTGATGTCATTGGAATTCATTGGTATGGACAGAGTTTAGT	mm	chr12:53390420	FALSE	1.20213	1.3736	chr12:53390360	chr14:32298938	113227	+	ENSMUSG00000035142	0.442029	0.00724638	1.28657	2.28487	0.977761	1.10132	1.9369	0.760525	1.78572	1.28786	0.164659	0.0783133	0.835341	0.921687	0.517176	0.337327	1	1	FALSE	FALSE	1	1	0	FALSE
mm_Sliding_topH3K27Ac_slide_-80_chr18:67697035	1682	2846	2625	3603	1507	1949	2008	2552	2445	3171	363119710	CAGTGTATGAGAGACAGATGTCTGTGGCTTTATTCCTCTGAATCTATTCAAGCAGCAATCGGATCGCTAACATGCATCTCAGTGTGAGTTAACATGTAGTCTGCACTATGTATGACACAGCTAGCTTTGGCTCTTTGC	mm	chr18:67697035	FALSE	0.928901	0.946838	chr18:67696955	chr18:12521000	-11952	-	Spire1	0.434783	0.0144928	1.52863	1.18125	0.887415	1.09923	1.10021	1.51627	1.35494	0.99332	0.654618	0.261044	0.345382	0.738956	0.900463	0.602666	1	1	FALSE	FALSE	0	0	0	FALSE
mm_Sliding_topH3K27Ac_slide_-20_chr5:35002830	1122	1473	903	2020	294	989	913	1075	1520	781	1698190916	CAGTTCAAGAAACTCGTGCATAGGATGCTGATGTAAAACCACGCCCAGCTTCGTCTCGCGATGAGTGCGTCAGCTTCCCGTATTTCGCGAGAAGTACACAAGTCCTGGATGACACTAAACAGGCACTACAGTTTACTG	mm	chr5:35002830	FALSE	1.71483	2.38993	chr5:35002810	chr4:2965174	-7	-	Nop14	0.492754	0.0652174	4.05541	3.39465	1.82834	1.88001	3.76192	2.67362	3.72503	2.05238	0.0140562	0.00401606	0.985944	0.995984	0.130419	0.0770232	1	1	FALSE	FALSE	0	0	0	FALSE
mm_Sliding_topH3K27Ac_slide_80_chr15:82771490	822	723	772	1536	501	647	545	710	664	924	890501041	CAGTTCAGCCAAGAGCCCTCGCGTGGAAACCACCACGCTGAAGGTGGCAATATTTCACCTCACCTAGAAGTGTACTGTGAGCGCTGGAGTCTCAATGGAGCAAGTGTTTGTGTGTGGCTGGGGAGGGAGGTACTGGAT	mm	chr15:82771490	FALSE	0.86522	0.882448	chr15:82771570	chr22:42713242	-18076	-	ENSMUSG00000092751	0.543478	0.0289855	1.1681	1.51476	1.01098	1.04952	1.61733	1.34134	1.47933	1.03025	0.562249	0.178715	0.437751	0.821285	0.858248	0.501658	1	1	FALSE	FALSE	0	0	0	FALSE
mm_Endogenous_chr16:95925015	180	155	194	271	178	245	227	318	315	358	1746685560	CAGTTGAGAGACTTGCTCCCGCTGTGGAAGCTCCTGTCGGTATCTGCCTGCCTACACCACCGCCAATCCGGAGATACATCTCAGTGTTAAGCTTTTATTAAAATCTGAGTAATCTCGCAGTGCAGTTAATGTGAACAC	mm	chr16:95925015	FALSE	0.930132	1.08049	chr16:95925015	chr21:40178998	909	+	ENSMUSG00000022895	0.478261	0.0362319	0.704841	0.752212	0.988085	1.21324	0.996818	0.948726	0.972772	1.10066	0.413655	0.646586	0.586345	0.353414	0.773041	0.880951	1	1	FALSE	FALSE	0	0	0	TRUE
hs_Sliding_topH3K27Ac_slide_-100_chr2:28114146	1236	1075	1036	2542	975	1447	1273	1606	1518	2026	173369848	CATACAGTTTGGAAGAGGGGAGAGTGTCCCTTTTTAAGACGTCCCCTAGAGTGGGGTGGTCATTCTTCGGGTCTGAGCTAACTTGTTTTTCTCGAATGTTGCCCCTTGGGGGAAATTGCTTCCCCAGTGTAACTTCCC	hs	chr2:28114146	FALSE	0.921703	0.920079	chr2:28114046	chr5:32000875	NA	-	BRE-AS1	0.5	0.0217391	0.892449	1.28814	1.03119	1.0827	1.24962	0.924942	1.09029	1.05695	0.51004	0.502008	0.48996	0.497992	0.831533	0.788017	1	1	FALSE	FALSE	0	0	0	TRUE
mm_Endogenous_chr16:21846060	95	36	90	270	229	466	371	486	468	582	1318861666	CATACCTGCCTGAAGCCTATTGGCTGGGCATTCTCTGGGCCCTCCCTCTCCCTCCCCCCAACCTTTTCCTTCACAGCACACACAGCCACTAAGTCTGTGCGGAATCCTAAACCAGCCCAATTTACATCCATTCATGAA	mm	chr16:21846060	FALSE	0.935089	0.987451	chr16:21846060	chr3:185080927	211	-	ENSMUSG00000092078	0.528986	0.00724638	0.127247	0.582532	1.15604	1.14055	0.408933	0.34211	0.375521	1.1483	0.345382	0.967871	0.654618	0.0321285	0.731008	0.982187	1	1	FALSE	FALSE	0	0	0	TRUE
hs_Sliding_topH3K27Ac_slide_60_chr8:81397685	119	56	103	148	81	105	127	147	99	196	49435685	CATACTGTAATACTCACAAGGTGGTTGTAGAAGTATAAACACGACTGGAGTTATCTGATTGGCTGCTGGTGATGTAACACCCATGTCAATACTTCCCAGTGAACGCACGTGTTCGACCTTTTATTTAAATTTCCATTT	hs	chr8:81397685	FALSE	0.950494	0.620257	chr8:81397745	NA	NA	+	ZBTB10	0.398551	0.0289855	0.559606	0.902751	0.773472	1.02439	1.44819	1.10691	1.27755	0.898929	0.805221	0.311245	0.194779	0.688755	0.939288	0.634127	1	1	FALSE	FALSE	0	1	0	TRUE
mm_Sliding_topH3K27Ac_slide_-100_chr7:28460255	58	44	26	64	56	276	190	322	247	355	1618262165	CATAGCCAGATTTGCTTGCCTCACCAGCTATGGGATCACTGGCATCTGCAGTAAGAACTTGTCTATACTCTTCTGCCTCCTATAATGAGCTTCAGTTTGGAGAGAGGGGGCTGAAAGGAGGGGTTTCCGGGGGTGGGG	mm	chr7:28460255	FALSE	0.785104	0.8544	chr7:28460155	chr19:40696598	376	+	C030039L03Rik	0.521739	0.00724638	0.635981	0.564655	1.12251	1.23888	1.02095	0.404152	0.71255	1.1807	0.293173	0.821285	0.706827	0.178715	0.680962	0.929292	1	1	FALSE	FALSE	0	0	0	TRUE
mm_Endogenous_chr3:79432895	203	123	92	264	95	389	318	408	384	369	2143694658	CATAGCGAGGCTGATTTGCTAGGCATTCTGGGAGTTGTAGTGTTTAGCTCCTGGAGCTGTGCGCAGGAGCCTGGTGACGCCTGGCTTGATATCTGATTGGCTGTCTGGAAAAAATGAGACGTACTTGGGGTCCAGGGC	mm	chr3:79432895	FALSE	1.26416	1.2779	chr3:79432895	chr4:159593176	-105	+	4930579G24Rik	0.536232	0.0289855	1.048	1.373	1.52207	1.51021	2.10638	0.842992	1.47468	1.51614	0.062249	0.180723	0.937751	0.819277	0.319911	0.503589	1	1	FALSE	FALSE	0	0	0	FALSE
mm_Sliding_topH3K27Ac_slide_-60_chr1:80387110	101	73	60	280	97	332	344	297	292	335	1654455161	CATAGGAACAGGGATTCATGCCTCTCTTGGTTGGTGATTTTACTTTCAAGGAAAATGCAAGGACAGATTGTAGCTGTTCACGGTTTCAAAGCTTCACAGAAAGAAATGGCTTCAGATTATATTGTCTCCTAATTAGCA	mm	chr1:80387110	FALSE	1.50631	1.07036	chr1:80387050	chr2:225493770	5227	-	ENSMUSG00000090637	0.391304	0.00724638	0.609159	1.42619	1.43088	1.21092	1.02639	0.538442	1.01767	1.3209	0.144578	0.582329	0.855422	0.417671	0.486213	0.836459	1	1	FALSE	FALSE	0	0	0	FALSE
mm_Sliding_topH3K27Ac_slide_-40_chr2:93998290	462	311	414	1027	493	768	744	688	810	1027	1359166517	CATATCCATGTGTCTATTGGTGACTTCTCTTTCCTGTAAGCGTACTATGTCTCCTATTGGTTAGCCTTCGTTTCGTAGCCCCGCCCACAATCCCCTTCGGCGCGCTCAGAGCCGCATTTCCGTATTAAGACAGTGGCT	mm	chr2:93998290	FALSE	1.06268	0.968517	chr2:93998250	chr11:43702147	89	-	ENSMUSG00000027195	0.507246	0.0652174	0.510614	1.02924	1.0797	0.914999	0.923759	0.730992	0.827375	1.0156	0.608434	0.767068	0.391566	0.232932	0.887321	0.921206	1	1	FALSE	FALSE	0	0	0	TRUE
mm_Sliding_topH3K27Ac_slide_40_chr1:54764910	647	787	749	1747	529	918	887	913	1030	1156	342123784	CATATTCAGATACGTGCCTGCCTCACATCAGATCTTTTATGAATGGCTGATCCCAGATGGTGGTGCCGTCAGAAGCATGAGTTTAATACGGCATCTAGTTTCTTTTTGCTCCAGCATATCGTGTCATTTCCAACTGCT	mm	chr1:54764910	FALSE	1.12556	1.09414	chr1:54764950	chr2:197924391	26418	+	uc007azt.1	0.442029	0.0289855	1.2042	1.63166	1.14656	1.07874	1.20562	1.2325	1.41793	1.11265	0.389558	0.206827	0.610442	0.793173	0.752167	0.526735	1	1	FALSE	FALSE	0	0	0	FALSE
mm_Sliding_topH3K27Ac_slide_-60_chr3:89154275	398	551	837	1335	496	456	386	454	534	629	1044194839	CATCACACTTTATTAAGCAAGAAGGCGGGCAGCATCCCTTCAATCGCCATACACAGCGTCGTCGTTGCTGTCGCTGTGGGCGGATGACGAGAGCTCTTCGCGGGGCGTGCACACCGGGCAGAGCCGTTGCATGTCGTC	mm	chr3:89154275	FALSE	0.900199	1.04252	chr3:89154215	chr1:155023272	223	-	Adam15	0.594203	0.101449	0.899186	1.32981	1.04671	0.985843	0.790979	1.46894	1.12996	1.01628	0.606426	0.461847	0.393574	0.538153	0.887321	0.763739	1	1	FALSE	FALSE	0	0	0	TRUE
mm_Sliding_topH3K27Ac_slide_-100_chr7:116309730	663	906	571	2237	727	828	1650	1200	1888	1536	1417651027	CATCAGTAGTTAATGCAGTATTGACTGCATTACACGCTCCCGTGCCTCCCCTCGCTAATGCCAATTGCATCACCTTGTACAGTCACCGGCTTGCTTAGCCAATAGCCGTTAAAAGCAATCCAAATCATGAATCATATG	mm	chr7:116309730	FALSE	1.57578	1.5094	chr7:116309630	chr11:8280686	-4112	+	uc009jdl.1	0.456522	0.0362319	1.00873	1.52028	0.778306	1.06707	0.898965	0.683693	1.2645	1.54259	0.0562249	0.325301	0.943775	0.674699	0.296043	0.648524	1	1	FALSE	FALSE	0	1	1	FALSE
mm_Endogenous_chr11:108033420	94	90	124	216	28	155	125	162	166	125	1444251098	CATCATACACAACTGTGTGTGGATGACAGCAACCTGTGGTTAATCTCCATATCAGGGAGTCCCTTACGCTGTATAACAAAGCGACTCCAAGATCTGTTTCCATGACAACAGCAGCATCACACAGGAAAGAGAATGGAG	mm	chr11:108033420	FALSE	1.4669	1.63076	chr11:108033420	chr17:64515009	-9743	+	ENSMUSG00000084978	0.456522	0.0144928	2.60174	3.81142	1.79033	1.77014	3.30928	3.85499	3.58213	1.78023	0.0220884	0.0060241	0.977912	0.993976	0.162375	0.0847571	1	1	FALSE	FALSE	1	1	0	FALSE
hs_Sliding_topH3K27Ac_slide_40_chr12:8235294	42	115	116	274	200	121	130	137	130	239	1770399810	CATCATGCACTTTCAGTCGTGCTTGCTCCATTGCCAGTCCCCTTTCATTCGCTCTTCCCTGCGTCCTTCAGCTTATCATCCTCATCCTTTCTCTCTCTCTCTCTCTCACACACACACACACACACACACACACACACA	hs	chr12:8235294	FALSE	0.797898	0.667941	chr12:8235334	chr6:122824930	NA	+	ENSG00000089818	0.5	0.0217391	0.465423	0.67688	0.730969	0.782934	0.207006	0.504879	0.571151	0.756951	0.949799	0.903614	0.0502008	0.0963855	0.989773	0.961052	1	1	FALSE	FALSE	0	0	0	TRUE
mm_Sliding_topH3K27Ac_slide_60_chr14:55708255	400	391	437	1205	292	485	825	647	1048	1737	198348854	CATCATGGAGGAGGGACTCTGTCAGGTTGCCAAGGCAACCAAGCAATTTATGACATCAGAGGCTTGAAGTGTTTGGTTCTCTCAGGGGGCTGGGAAGATTCAAGTTCCTGTCAGTTGCAGTAAATGGGAATTATACTT	mm	chr14:55708255	FALSE	0.696716	0.740891	chr14:55708315	chr14:24017704	-2510	-	Zfhx2	0.463768	0	1.08386	2.0389	0.403138	0.508753	1.35033	1.30274	1.56138	0.718804	0.963855	0.134538	0.0361446	0.865462	0.989773	0.424903	1	1	FALSE	FALSE	1	1	0	FALSE
hs_Sliding_topH3K27Ac_slide_60_chr14:24017703	114	106	111	348	145	218	243	311	323	421	942749465	CATCATGGAGGGAGGAACCCTGTCAGGTTGCCAAGGCAATACCAGCAATTTATGACATCAGAGGCTTGAGGTCTTTGGTTCTCAGGGGCTGGGAAGATTCAAGTTCCTCTCAGCTGAAGTTTATGGGAATTCTACTTT	hs	chr14:24017703	FALSE	0.846693	0.942135	chr14:24017763	NA	NA	-	ENSG00000136367	0.471014	0	0.591722	1.18578	0.747628	1.00898	0.774998	0.666368	0.888748	0.894414	0.817269	0.720884	0.182731	0.279116	0.949792	0.909709	1	1	FALSE	FALSE	1	1	0	TRUE
mm_Sliding_topH3K27Ac_slide_40_chr4:128411660	1059	375	613	1296	1027	1322	1268	1342	1512	2848	233755341	CATCCAGCTGTTTACAATTGAGCTTCTGCACACTCTAGCCTGTGATTTGGGGTGAGTCTGCCTCTGTCCTGAGAGACGGCATGAGAGTCAGCTGTACAGTAGTGGCTGCCAGGAGGGAGGGGTTGGTCCTCCAGCCAA	mm	chr4:128411660	FALSE	0.653102	0.651936	chr4:128411700	chr1:33808030	6515	+	ENSMUSG00000028796	0.550725	0.00724638	0.295556	0.623485	0.670197	0.643598	1.01646	0.519576	0.768017	0.656898	0.971888	0.797189	0.0281124	0.202811	0.99035	0.926906	1	1	FALSE	FALSE	0	0	0	TRUE
hs_Sliding_topH3K27Ac_slide_20_chr12:48577365	672	1043	595	1193	68	139	143	162	223	76	484803805	CATCCTCCCTTTTTCTTCGCCACTTCCTGGTTACCATGGAGACACACGTCATTTACGTGCCGTGCGTCGCCTTGGAAACAGAGGAGCATCCGCGACACCCCCGGGAGACCCACCCCAGCTGCTGCTGCCACACTCGCG	hs	chr12:48577365	FALSE	2.7601	3.60316	chr12:48577385	chr15:97998220	NA	+	CCDC184	0.608696	0.0797101	12.4152	8.66808	2.64066	2.91141	9.74146	7.61671	10.5417	3.18163	0.00200803	0	0.997992	1	0.0259157	0	1	1	FALSE	FALSE	2	0	0	FALSE
mm_Sliding_topH3K27Ac_slide_-60_chr8:96091180	263	345	230	458	156	214	330	265	223	357	1476288576	CATCCTGGTCCCCAGAAAGACACTGGGCTTAAACCAGACAGCATCTTTCAGAGAGCGTCCCTGTTTCTTTATGAGAGCATTCGAGGAGAAGGCTGCGCTGATTGACGTGGGTTGTAATAATACTCATTTGGCTGTAAT	mm	chr8:96091180	FALSE	1.35596	0.76706	chr8:96091120	chr16:55940218	31453	-	Ces5a	0.471014	0.0289855	1.79009	1.45055	0.86548	1.01386	1.66186	1.2834	1.62032	1.06151	0.502008	0.114458	0.497992	0.885542	0.831533	0.396103	1	1	FALSE	FALSE	0	0	0	FALSE
mm_Sliding_topH3K27Ac_slide_-40_chr4:48057230	39	31	40	174	59	165	151	115	221	207	1893567426	CATCTACAACCCTCAAATGCGAGTTGAGTTCCATGTCTGACCCGGTGCTGGGGAGTAGAGGAACAGTCAGACTCACTCAGCTGTTCAACACGTGTGGTGTGTTTGTTTTATATATAGTTTCTCGTGCAGCGCGCGCGT	mm	chr4:48057230	FALSE	1.07006	1.31104	chr4:48057190	chr9:102583356	-874	+	ENSMUSG00000028341	0.5	0.057971	0.425294	1.4571	1.15087	0.758804	0.651593	0.590156	0.941195	1.19055	0.269076	0.670683	0.730924	0.329317	0.651438	0.885559	1	1	FALSE	FALSE	0	0	0	TRUE
mm_Sliding_topH3K27Ac_slide_20_chr2:35992210	130	79	101	294	216	409	375	400	562	608	1144119853	CATGACGCCCGCACCTCCGCTGTCCCGCGTGTGTTTCTCTATAGTCCCGGCCGTAGCTGGTGAGTGGCCTTGAGTGTGTGTGGGGGTCGGCTCTCAAGGAGTGGGCGGGATTCGAGCTCTGGTGACACTTTTCTAGGC	mm	chr2:35992210	FALSE	0.904752	1.13508	chr2:35992230	chr9:125027196	26	-	Rbm18	0.615942	0.0724638	0.296042	0.672488	0.97125	0.898584	0.593271	0.40703	0.500151	1.01991	0.594378	0.931727	0.405622	0.0682731	0.881425	0.970749	1	1	FALSE	FALSE	0	0	0	TRUE
mm_Sliding_topH3K27Ac_slide_-20_chr11:68939355	363	261	188	814	460	912	1162	1058	1365	1402	78608796	CATGATGGCCTTGTCACGTGCTAAGATGTGTGTTATTCACTTGATTGTTGATGAGGTCACCTGGCATTTATGAATTGGTGCAGCTTTCCGATGCACGGTGTGATTCACGTGGGTGATTCACATGTAGGAATTCTGGTG	mm	chr11:68939355	FALSE	1.21579	1.19558	chr11:68939335	chr17:8021851	-82	+	ENSMUSG00000020892	0.456522	0.0289855	0.459264	0.874294	0.9392	1.03072	0.777879	0.355762	0.666779	1.20569	0.251004	0.85743	0.748996	0.14257	0.634534	0.949841	1	1	FALSE	FALSE	0	1	0	TRUE
mm_Sliding_topH3K27Ac_slide_-40_chr17:85025780	721	486	825	592	195	459	301	569	268	372	1503207508	CATGCTCACCATATCATCTGGCATCCTAGGGCTTGATGCTGAATACGGAGAAGTAAGCCGAAGGTGGAGAACTACACTTCCCATGAGGCTGCTCTTTGGGACGCAACCTCGGCCGTGACGTCGTTGCCATGGCAACCG	mm	chr17:85025780	FALSE	1.18693	0.884677	chr17:85025740	chr2:44001126	-135	+	ENSMUSG00000024253	0.550725	0.057971	2.01735	1.49996	1.78148	2.08916	3.64472	3.6828	3.66376	1.93532	0.0180723	0.0060241	0.981928	0.993976	0.147019	0.0847571	1	1	FALSE	FALSE	1	0	0	FALSE
mm_Sliding_topH3K27Ac_slide_-100_chr15:97998220	437	167	300	859	463	992	969	1067	1391	1454	2059636818	CATGCTGTCCTATTAAACATTGCAGCCACATGCTCTTTGCAGCTTCTCTGAGGCTACTGCAGCATCCCTGCCCCGCCCGTCAGCCCATACAACAGAGCTTCACTGCAGCTTCGGAACCCTGTTCTCTTTCTTCCTCAC	mm	chr15:97998220	FALSE	0.9776	1.17478	chr15:97998120	chr12:48577365	-216	+	Ccdc184	0.536232	0.0217391	0.291954	0.91665	0.985051	1.00231	0.930388	0.564026	0.747207	1.07619	0.46988	0.815261	0.53012	0.184739	0.814695	0.928905	1	1	FALSE	FALSE	0	0	0	TRUE
mm_Sliding_topH3K27Ac_slide_-100_chr13:69900465	3985	4158	4539	8719	3599	3575	3135	3728	3996	6248	1013115668	CATGGGCTTACTCCCAATGTTCATCTGTCTGTGGGACTCAAGGGCTGACTCCTAGGTGGCCACAGTGGAGCATGTCGTTCATGGCTGCACTGTGGTCTGCGCATCGTTCAGAGCCTCGGCCCATCTGTCTGGCTCCCT	mm	chr13:69900465	FALSE	0.736035	0.785375	chr13:69900365	chr5:6430764	21490	-	Ube2ql1	0.57971	0.0289855	0.935152	1.19695	0.826126	0.814962	1.09147	1.09784	1.09465	0.820544	0.907631	0.5	0.0923695	0.5	0.979841	0.787024	1	1	FALSE	FALSE	0	0	0	TRUE
mm_Sliding_topH3K27Ac_slide_20_chr3:9249875	381	514	471	1084	207	410	429	468	441	446	1870190844	CATGGGGAAAACCCTGCCTAATATTTATAACGCTATGACATACTGTAATACTCACAAGGTGGTTGTAGAAGTATAAACACGACTGGAGATATCTGATTGGCTGCTGGTGATGTAACACCCATGTCAATACTTCCCACT	mm	chr3:9249875	FALSE	1.41099	1.21422	chr3:9249895	chr8:81397686	-651	+	Zbtb10	0.413043	0.0144928	2.00989	2.58732	1.32727	1.43322	1.81434	1.98066	2.2986	1.38025	0.106426	0.0220884	0.893574	0.977912	0.41851	0.164489	1	1	FALSE	FALSE	0	1	0	FALSE
hs_Sliding_topH3K27Ac_slide_40_chr2:197924391	259	184	199	479	207	288	302	305	281	493	1438204607	CATGTATTCAGATATGCGCCTGCCTCACATTTAATCTTTTATGAATGGCTGCTCCCAGATGGTGATGTGATTCAGCAATGCAATTTTAGATACACCATCTATTTTCCTTACTTCAATGTACTGTGTCAATTACAACTT	hs	chr2:197924391	FALSE	0.898591	0.699926	chr2:197924431	chr1:54764910	NA	-	ENSG00000065413	0.369565	0.00724638	0.719494	1.14329	0.843445	0.844997	1.23337	0.836839	1.0351	0.844221	0.893574	0.556225	0.106426	0.443775	0.976353	0.820032	1	1	FALSE	FALSE	0	0	0	TRUE
hs_Sliding_topH3K27Ac_slide_80_chr15:29336242	362	131	275	920	361	494	719	643	762	876	1670527227	CATGTGAGACCAAATGGGGGACAAGATTGGTGTCAGGAACAATTTGGCTGAGTCTGTTTCTCATTTGTATGATACGTTTTCACCCAGCCTGTATTGTGGTCACTGAATAGCTATTTTTCATCTGGTCTGCTATATTAC	hs	chr15:29336242	FALSE	1.204	1.06818	chr15:29336322	chr7:71833010	NA	+	ENSG00000034053	0.413043	0.00724638	0.293727	1.25913	0.814206	1.00256	0.988473	0.663109	0.825791	1.13609	0.35743	0.767068	0.64257	0.232932	0.735808	0.921206	1	1	FALSE	FALSE	0	0	0	TRUE
mm_Sliding_topH3K27Ac_slide_80_chr12:120702940	24263	10665	12904	30852	5251	10153	9885	10644	11569	10852	1057204113	CATGTTAACCTCTGTATATGTCTGTATTCTCCCATTTGTCTTATTTGGTTTGCCTTTGTCTTCATTCCCTCTGAGCCTGTTGCCTTGGTAACCATCACTATGTGCTTGTATGTGAAGCTTTCCTTTGACGTGCATTTA	mm	chr12:120702940	FALSE	1.33619	1.30912	chr12:120703020	chr7:20181643	21218	+	Macc1	0.405797	0.00724638	1.64399	2.9029	1.35082	1.33967	4.55477	2.13915	3.34696	1.34524	0.130522	0.0060241	0.869478	0.993976	0.465782	0.0847571	1	1	FALSE	FALSE	1	0	0	FALSE
mm_Sliding_topH3K27Ac_slide_-100_chr18:42875035	166	72	115	281	102	407	467	557	609	642	1136107542	CATGTTCTCTCTGGAGCCCGACTCAATATGTTCCCTAATTGGTTATTTTTTTTTTTTTTCTTCACAAGAACTGCTAGTTTAAAATGGCATTCTATTCTAGGTCTATTTATAGGCACAGGATTTTTCTTTTTCTTTTTT	mm	chr18:42875035	FALSE	1.06705	1.16486	chr18:42874935	chr5:146052480	135529	-	Gpr151	0.318841	0.00724638	0.571363	1.36112	0.915315	1.18501	1.60425	0.981424	1.29284	1.11596	0.38755	0.303213	0.61245	0.696787	0.752167	0.631632	1	1	FALSE	FALSE	0	0	0	TRUE
mm_Sliding_topH3K27Ac_slide_-60_chr15:82176345	2717	2722	4481	5727	1015	3862	2766	3289	3573	3589	2005980055	CATTACACATTCTGGTTCCTTAATTCAAGTCTTCCCGAGGTGAGGGGCGGGAACACCTACAAAGGGAGCCCTGGCGGCCCCGCCCTCTGGAGTCCGGGAGGGGCGTCCTTCTCCTGACGTCACTACGTCGTCCGGGCG	mm	chr15:82176345	FALSE	1.13053	1.22251	chr15:82176285	chr22:42475584	-158	+	ENSMUSG00000022452	0.623188	0.0797101	2.17071	2.78774	1.55364	1.25168	2.63868	3.84298	3.24083	1.40266	0.0983936	0.0060241	0.901606	0.993976	0.396927	0.0847571	1	1	FALSE	FALSE	0	1	0	FALSE
mm_Endogenous_chr5:81452050	244	91	159	466	240	476	437	360	358	609	897550933	CATTAGGAAGTGTAAGGCTGCTTGCACCTCTGATTTTACATCCTTGCAGCCAGCTGCCGGGGAAATGAGGAGACACATAGATTCTGGCAGGAAGGGAAAAAATGCCTTCTGTGTTTTGCTCCGAAGTAAATAGGAGGT	mm	chr5:81452050	FALSE	1.05261	0.721869	chr5:81452050	chr4:62069223	1216	+	ENSMUSG00000037605	0.471014	0.0144928	0.306909	0.959325	1.1285	0.807398	1.00217	0.576693	0.789433	0.967948	0.696787	0.777108	0.303213	0.222892	0.912309	0.921206	1	1	FALSE	FALSE	0	0	0	TRUE
mm_Sliding_topH3K27Ac_slide_-100_chr7:71833430	200	78	116	341	237	338	353	371	384	377	1295421612	CATTAGGATGCTTCCGGAGCCCAGGGCTCGGCCGTGTCAGAGGCTGTGTTTCCTGTTGATTTATGTGCTGTCACAGAATTAATTGAGTCTGGACACAGGGTCTCATTTTCTTGGACATGTAGCGGGTAATCGTGCTTC	mm	chr7:71833430	FALSE	1.37352	1.25079	chr7:71833330	chr15:29336675	53314	+	ENSMUSG00000030519	0.5	0.0362319	0.266395	0.710881	1.29445	1.34411	0.83185	0.426058	0.628954	1.31928	0.144578	0.881526	0.855422	0.118474	0.486213	0.957986	1	1	FALSE	FALSE	0	0	0	FALSE
hs_Sliding_topH3K27Ac_slide_-100_chr14:90810968	435	270	300	645	463	812	646	774	712	809	158498865	CATTCCTAGTGCAGTTCTCCATCCTGCCTCATTAGAGATGCTTATGTCATGGACAGAACCTCCACAATGCAGCTTGATTGGCTTAAGCAGAAGACACAGATCTTTCCATGTTAGACTGAAAGGTGGCATCGAGGATGG	hs	chr14:90810968	FALSE	1.17135	1.08075	chr14:90810868	chr12:101405355	NA	-	NRDE2	0.463768	0.00724638	0.472022	0.688287	1.44917	1.30676	0.92613	0.564026	0.745078	1.37796	0.108434	0.815261	0.891566	0.184739	0.422535	0.928905	1	1	FALSE	FALSE	0	1	0	FALSE
hs_Sliding_topH3K27Ac_slide_-40_chr2:28114146	968	1913	1858	3372	965	1848	1679	1991	2322	2472	713417002	CATTCTTCGGGTCTGAGCTAACTTGTTTTTCTCGAATGTTGCCCCTTGGGGGAAATTGCTTCCCCAGTGTAACTTCCCTCGTGCGCTGTATGACGTCGACGTGACGCAGCAGGATGCCACCCCTTTCCGTTCCATGAC	hs	chr2:28114146	FALSE	0.996332	1.15347	chr2:28114106	chr5:32000875	NA	-	BRE-AS1	0.536232	0.0652174	1.6046	1.72644	1.07936	1.10008	0.988807	1.67601	1.66552	1.08972	0.443775	0.106426	0.556225	0.893574	0.799727	0.395173	1	1	FALSE	FALSE	0	0	0	FALSE
mm_Sliding_topH3K27Ac_slide_80_chr8:67372545	32	37	26	86	31	57	32	74	45	87	1467516520	CATTGAAAACCGATAAGGTTCCATGAATCAGATCGAATGAAAAGGTTCACCCTTTTTGGAGAGAGGTTTGTCTGCGGTTTGAAAGTCAGATCCAAAGGACTCTGTACTCCTTCATAAAGGTTAAACTGATGAAGGTGG	mm	chr8:67372545	FALSE	0.539551	0.635164	chr8:67372625	chr4:166130060	-1011	-	ENSMUSG00000031605	0.413043	0.0217391	0.966095	1.37065	0.945947	1.16176	1.01754	0.730081	1.16837	1.05385	0.512048	0.429719	0.487952	0.570281	0.831533	0.746194	1	1	FALSE	FALSE	0	0	0	TRUE
mm_Endogenous_chr15:103103210	229	333	258	740	278	301	345	369	527	603	777303145	CATTGAAAATTCCGGGTGACAATCTAACAGCTGCCTCTTCTGGCTGGACAGTTGGCTTCCGTGAAGCGAGTGACTACGCTGACTGGTCAAGACGCGAAGGCTGGCTCATCTTCACCCAATGTTGCCTCTTTGAGGCGG	mm	chr15:103103210	FALSE	0.839274	1.07321	chr15:103103210	chr12:54718806	-131	+	ENSMUSG00000060992	0.536232	0.0507246	0.96957	1.31516	0.72071	0.835817	0.811997	0.807856	1.14236	0.956244	0.714859	0.455823	0.285141	0.544177	0.912309	0.762593	1	1	FALSE	FALSE	0	0	0	TRUE
hs_Sliding_topH3K27Ac_slide_40_chr13:30491898	119	125	134	288	84	34	101	99	35	82	1175325732	CATTGATGTATATATATGTCATTATGTTGAATTGAATTTCTGTTAACTGTAACCATGACAACAACACATCCCATTCACATGTAGAGAACAGTGAGTCGTTTGGACAAGCATCAGTGAAGGCCCGGCTTCCTAAGAAAA	hs	chr13:30491898	FALSE	1.8068	0.52414	chr13:30491938	chr5:149436765	NA	-	LINC00572	0.376812	0.0144928	1.20451	1.69396	0.598655	1.64901	1.39647	1.38862	1.44924	1.16547	0.325301	0.190763	0.674699	0.809237	0.721268	0.514446	1	1	FALSE	FALSE	1	0	0	FALSE
mm_Sliding_topH3K27Ac_slide_20_chr4:151851750	189	376	317	566	216	244	205	190	358	269	1422826062	CATTGGCAATGGCCAAGGCAGTCCATGCAAATCATGCAGCTCCCGCCGATGCGTGGATTGGCGGGCGCGCGCAGAGTCAGAATCCTTGGACTCGGGTTCTCATTGGCCGCGCGGCCTTGACGCAAAAGTGACGTGGGG	mm	chr4:151851750	FALSE	1.1179	1.63427	chr4:151851770	chr1:6052584	132	-	Kcnab2	0.615942	0.0942029	1.40901	1.29465	1.30963	0.964725	0.862525	1.27751	1.35183	1.37609	0.110442	0.263052	0.889558	0.736948	0.427448	0.603625	1	1	FALSE	FALSE	0	0	0	FALSE
mm_Sliding_topH3K27Ac_slide_-60_chr6:31274950	3003	5461	4308	6119	3492	3943	5717	5721	7169	7733	131254421	CATTGTCTTAACCACTAGGGCCCCGCTGCTACCTTCAGCTCAAGCTTATTATCAGCATCCACTTATTCAGCCAGGATGCTGTGACGTCCATTGCAGAGAGTGAGTCAGAAGCCACAAGCTAACAGGTCTATTCCTTTC	mm	chr6:31274950	FALSE	1.08448	1.13842	chr6:31274890	chr7:130920652	2860	+	ENSMUSG00000087380	0.485507	0.0144928	1.26584	0.86576	0.73619	1.01048	0.847705	1.07389	1.0658	1.11145	0.393574	0.516064	0.606426	0.483936	0.753687	0.790562	1	1	FALSE	FALSE	0	0	1	TRUE
mm_Sliding_topH3K27Ac_slide_-40_chr10:110603075	2709	1697	1686	7207	2265	1216	2084	1502	3173	15764	912823881	CATTTAACACTTCTTTGTGAGCGACATCTGCGTCGTGAAACATAACCTAATTTCATTTTAACTAAATGCCGTCTGAAATAAGTTAACTTGGGTTCGTCTCTAAACAGATGGGAACACTTATCTGACGATAGCATATCT	mm	chr10:110603075	FALSE	0.193925	0.24717	chr10:110603035	chr12:76952371	1138	+	Osbpl8	0.369565	0.0434783	0.606448	1.57209	0.111373	0.130139	1.17897	0.64796	1.08927	0.220548	1	0.502008	0	0.497992	1	0.788017	0	1	FALSE	FALSE	0	0	0	TRUE
hs_Sliding_topH3K27Ac_slide_40_chr7:127581814	38	36	30	77	63	281	338	272	473	441	727069725	CATTTATGCTATATTTGTACCATTGCCTTCTTCATGAATGATGTCGTATGTGCAGGGAATGCAGAAATAACTCTTCTAAGGCCCTGATGTATTTTAGTCTCTTTTTTAGCAAACTGCTATTTCTTTTTTACTCTTGAT	hs	chr7:127581814	FALSE	1.12429	1.31709	chr7:127581854	chr6:28704050	NA	+	ENSG00000197157	0.34058	0.00724638	0.462532	0.603867	0.919981	0.842428	0.594575	0.414515	0.533199	1.22069	0.230924	0.919679	0.769076	0.0803213	0.606086	0.965522	1	1	FALSE	FALSE	0	0	0	TRUE
mm_Sliding_topH3K27Ac_slide_80_chr1:79578030	485	876	509	1281	154	301	383	250	427	379	647299692	CATTTCCCTTCTGCTTCTGCAATATGCTTTTTTTGTGTGTGTGAATGACTAACCAAACGCTACAAAGAGCTTTCAGGTCCGGGCTGAAGATGCGGGGAGGAGAGATGACTCATCCCTCTGACGTCAGAGCCTCCTTCC	mm	chr1:79578030	FALSE	1.48239	1.38351	chr1:79578110	chr2:224590337	67751	-	ENSMUSG00000077782	0.492754	0.0289855	4.60429	4.10979	1.14667	0.900955	3.10445	2.87711	4.35704	1.43295	0.0903614	0.00401606	0.909639	0.995984	0.391775	0.0770232	1	1	FALSE	FALSE	0	1	2	FALSE
mm_Endogenous_chr12:35182840	3876	4183	4662	7911	2918	4574	4687	4492	5855	6879	242021020	CATTTTCTCGCGGTGTTAATTTTGGTCTAACATCCTCCTGATGGTCTTGATTACCTTGGAGACTTACATCCTGCCTTCTGTGTATATGTGGTTGTTAGTCACTTCTACCAAGTTGTCTCACCACCACTTCTCAAGAAC	mm	chr12:35182840	FALSE	0.999474	1.04519	chr12:35182840	chr7:18561684	-30370	-	uc007nja.1	0.427536	0.0144928	1.16033	1.33948	0.960024	0.891901	1.30937	1.39074	1.35005	1.02233	0.590361	0.267068	0.409639	0.732932	0.878124	0.603625	1	1	FALSE	FALSE	0	0	0	FALSE
hs_Sliding_topH3K27Ac_slide_-100_chr13:48459866	477	274	272	755	276	639	505	493	729	942	992615847	CATTTTGCTTTCTTTCTTAGTTACCACTAACATCTTTGCTCTATATTTGTGTCTCAGTGATGTTCCCTTCTTGCTGCTAAGCCTGGTCTATTGTTGGCATGGCACATGTGGGCTGCATGGGTAATTTGTGTCCTAGGA	hs	chr13:48459866	FALSE	0.786398	0.950319	chr13:48459766	chr14:74087735	NA	-	ENSG00000234689	0.427536	0	0.803565	1.35154	0.979403	0.714823	1.70362	0.857865	1.28074	0.868358	0.861446	0.311245	0.138554	0.688755	0.965821	0.634127	1	1	FALSE	FALSE	0	0	0	TRUE
mm_Sliding_topH3K27Ac_slide_40_chr13:75228715	42	64	35	78	74	297	469	292	459	712	2062343533	CATTTTGGCGCGTTTTCTATTCTGGAGGTGGTGATTGAGACTCTGAAGTCACAGATGAGTAATCGGCGTAGGCAGTGTCTATTTCATACATCAAATCCACTAGGAAATATTCCTTCTCTAGCCAGAGGCTTCATTCTC	mm	chr13:75228715	FALSE	0.966261	0.791636	chr13:75228755	chr5:95767516	1361	+	Pcsk1	0.434783	0.0289855	0.700048	0.52078	0.602265	0.560151	0.559476	0.411714	0.610414	0.878949	0.841365	0.895582	0.158635	0.104418	0.958967	0.960948	1	1	FALSE	FALSE	0	0	1	TRUE
mm_Sliding_topH3K27Ac_slide_20_chr12:31383275	320	128	200	656	116	1084	760	804	1292	800	774926510	CCAAAATACCCACAGCATTACTTGATTAAGGGGGCGTTGCAGAAGCAAAACAATTCCAAACAAAGTCGCTTGACGCAGGAAGTCCCAGTTGGTCCAGCTCCTATTTAGAACCCTGTGACTGAGCTTCTGAGCCAGAAT	mm	chr12:31383275	FALSE	1.39356	1.98319	chr12:31383295	chr2:517232	113980	+	ENSMUSG00000043061	0.471014	0.0217391	0.893165	2.79407	1.95637	1.37268	2.71929	1.50083	2.11006	1.68838	0.0341365	0.0421687	0.965863	0.957831	0.221115	0.259436	1	1	FALSE	FALSE	0	0	0	FALSE
mm_Sliding_topH3K27Ac_slide_40_chr6:28655570	86	32	62	145	57	50	50	73	51	112	1553769815	CCAAACACAACTCTGTGATAATGACAGCATTTGCCAGCACGCTTACGCAGTGACTCAGGAGACAGGGTGGCCAGCAGAGCAGCCTATTTGTGGGAGTGGATTTTAAGAAGTGCTAATTCCATGGCAGTTTGGAGATAT	mm	chr6:28655570	FALSE	0.654868	0.559171	chr6:28655610	chr7:127526138	-69	+	ENSMUSG00000001424	0.478261	0.0144928	0.454417	1.25685	0.64456	0.89024	1.48726	0.946839	1.21705	0.7674	0.943775	0.369478	0.0562249	0.630522	0.989773	0.687117	1	1	FALSE	FALSE	0	0	1	TRUE
mm_Sliding_topH3K27Ac_slide_40_chr11:93856515	79	71	24	179	51	159	162	148	269	252	451031570	CCAAACTTGAGACTGGAAGATGAGAATACACGGAAGTAATCTCTGACTCAGCCTGCCCAAGGCTAGGGTGTTGTGGCATTCCCCACGAGTGACGCACTCCCAAGATAGGTGACTTCATGTATCATGGGACTTATTCCA	mm	chr11:93856515	FALSE	0.94301	1.31082	chr11:93856555	chr17:49199395	-809	+	Spag9	0.492754	0.0217391	1.12685	1.7341	0.910978	0.802165	1.52693	0.409638	1.43048	1.12692	0.36747	0.200803	0.63253	0.799197	0.739897	0.52343	1	1	FALSE	FALSE	0	0	0	FALSE
hs_Sliding_topH3K27Ac_slide_-60_chr16:55948577	150	213	229	514	140	344	287	229	218	348	1404538299	CCAACCAGTTCTCTGGGAGTACGTGTCTGGCTGGGGATGCTTGCTAAGGACACCCAGGGTTCTATCTAAGACTCACTGCATCAGAATGTCTAGGGAAGGACATGCCCTTTAAACGAAATCCCTGATAACTTTCTGGAC	hs	chr16:55948577	FALSE	1.20977	0.769255	chr16:55948517	NA	NA	-	ENSG00000159398	0.492754	0.0144928	1.23149	1.81395	1.42722	0.898791	1.05615	1.42386	1.52272	1.163	0.327309	0.162651	0.672691	0.837349	0.721268	0.485126	1	1	FALSE	FALSE	0	0	0	FALSE
hs_Sliding_topH3K27Ac_slide_80_chr17:42201101	849	916	969	448	612	1595	1647	1880	2297	2020	2008709959	CCAACCCCTCCCCTGCCTCTCGGCCCTCCCCGCCGGGCGGGGCCAGCGACGCCATCGTGACAGCTCCTTAAAGGGCCAGTGCCCAGCACAGGGTTCGGCCGAGACGGGGTGGAAGGGAAGGGATCGGAACCCAGCGAG	hs	chr17:42201101	FALSE	1.19604	1.39638	chr17:42201181	NA	NA	-	ENSG00000108840	0.710145	0.0869565	1.2115	0.361674	1.14004	1.27119	1.36748	1.37826	1.37287	1.29621	0.160643	0.238956	0.839357	0.761044	0.516062	0.570503	1	1	FALSE	FALSE	0	0	0	FALSE
mm_Sliding_topH3K27Ac_slide_-100_chr1:154751825	177	191	285	795	204	333	309	332	277	353	616915017	CCAACTCCTATTAACCTAGAACAGTGTTTATTTGGAACGTGTTTCTGTTCTCAGGAAACGAAAGTACAGCCCACTTGGACATCATTCTCAAGGACAGCATGTCATTAACGAAATAGAAAGTGAACTATGCCCCCTCAT	mm	chr1:154751825	FALSE	1.28406	0.963602	chr1:154751725	chr1:183439472	1849	-	Smg7	0.413043	0.0217391	0.757849	1.92543	1.36201	1.28459	0.855277	1.21611	1.34164	1.3233	0.14257	0.271084	0.85743	0.728916	0.486213	0.603625	1	1	FALSE	FALSE	0	0	0	FALSE
mm_Sliding_topH3K27Ac_slide_60_chr8:23868005	194	361	124	1114	225	723	705	572	888	760	11795372	CCAACTCTGAAAATTCCTGTGATTCGATGACATCAGTACGGTGAATAATCAAACTGGCGGCAAGCCAAGACTGGCTGTGCTCCTCCGCGCGCACTTCCTCCCCCTCCTTAGAGACACCGGCTGCTCCATTGGCTCCTC	mm	chr8:23868005	FALSE	1.36075	1.4348	chr8:23868065	chr8:42065380	-90	+	Plat	0.550725	0.0507246	1.29869	2.44621	1.37352	1.02798	0.849929	0.479732	1.87245	1.39777	0.0983936	0.0682731	0.901606	0.931727	0.396927	0.326892	1	1	FALSE	FALSE	0	1	0	FALSE
hs_Sliding_topH3K27Ac_slide_40_chr10:101102134	72	95	25	222	108	533	534	523	674	595	833310467	CCAACTGGCTTAGATTCTGGTGACGAACAACTATTTTTTCATGCCCTAGTGATGTTGGTTACCATGGTGCTCTGGATGACACAGTTGGCTTTTTTATAATTGCCTTTTAGTGGCTCAAGAATTTATTTTGTGATAAAG	hs	chr10:101102134	FALSE	1.31652	1.39103	chr10:101102174	chr19:43526950	NA	+	ENSG00000119946	0.384058	0.00724638	0.711999	1.01559	1.29337	1.20057	0.657162	0.2015	0.863797	1.35377	0.126506	0.73494	0.873494	0.26506	0.463991	0.913817	1	1	FALSE	FALSE	0	0	0	FALSE
mm_Sliding_topH3K27Ac_slide_-100_chr12:32036340	68	35	38	81	88	251	244	248	423	386	161835388	CCAAGGAGCGGTACACACGACTCCAGCTCTGCATCGTCCCTCGGTCCCGTCCCTCCAACCAGGGGTTTTCACCTCCGCTGAACGCCTGGTAAGACTTATCCAAGGTCTCCCCACCCTGCGCCTGCGCAACATATACGT	mm	chr12:32036340	FALSE	0.927266	1.34569	chr12:32036240	chr7:107531553	-196	-	Dld	0.601449	0.0724638	0.321933	0.454772	0.938853	0.87754	0.76171	0.375889	0.5688	1.13648	0.35743	0.905622	0.64257	0.0943775	0.735808	0.961052	1	1	FALSE	FALSE	0	0	0	TRUE
mm_Sliding_topH3K27Ac_slide_60_chr6:83267650	125	159	126	258	87	134	190	115	142	252	1682753840	CCAATAGGAGATCTCAGTTCTACGTAAGCTGGTCCAGGAGCAGGTCCTGATTGGCTGAAGGAGTCAAGCCCCTGACTGAGGAGAGGCAGCAGTGGTCCCTCAGCTAGGCCAACTGAATCTGGGGTTCATTCATTCATT	mm	chr6:83267650	FALSE	1.106	0.691959	chr6:83267710	chr2:74425701	170	-	ENSMUSG00000005667	0.528986	0.00724638	1.4793	1.46518	0.767742	0.623304	1.4163	1.2607	1.47224	0.898979	0.805221	0.180723	0.194779	0.819277	0.939288	0.503589	1	1	FALSE	FALSE	0	0	0	FALSE
mm_Sliding_topH3K27Ac_slide_40_chr1:97564240	6853	10897	9620	9497	8355	400	392	440	538	427	641754660	CCAATCACCGTGCTGAGGGGGCGGAGGCTGCTGTTGCCTTGCGTTACTGGCGGCTGCTCGGAGAGTCGTTGTGAGCTCGGTCTGCACTATGCCGGGTGGAGGAAGCTCACAGTCGCACGCGGACGCGTTCTTGCGCAC	mm	chr1:97564240	FALSE	1.34667	1.5472	chr1:97564280	chr5:100239047	149	-	St8sia4	0.644928	0.101449	1.0557	0.561605	1.35252	1.40743	0.808533	1.00228	0.905405	1.44693	0.0863454	0.694779	0.913655	0.305221	0.384467	0.89299	1	1	FALSE	FALSE	0	0	0	FALSE
mm_Sliding_topH3K27Ac_slide_-40_chr9:107951560	3614	4659	3644	6261	3099	6156	4535	5862	6750	7493	1447955040	CCAATGGGCATCTGACTCGCGAGTTCTCCGGGTCCCCATGGCAGCCCAGGGCGTTGGAAATCTAATTGGCTACGTCCGCCGCAGCGTAAAGTCTGACGCTCGGCTGCGGGCGGCCCTGCCACGTAGATTGGCTCTCCC	mm	chr9:107951560	FALSE	0.887817	1.10622	chr9:107951520	chr3:49761420	-119	+	ENSMUSG00000070284	0.637681	0.0942029	1.21689	0.99819	1.18619	1.06854	1.14956	1.02357	1.10754	1.12737	0.36747	0.483936	0.63253	0.516064	0.739897	0.780344	1	1	FALSE	FALSE	1	0	0	TRUE
mm_Sliding_topH3K27Ac_slide_-20_chr4:48056395	2004	5969	2799	7300	1183	3104	4766	2684	5317	2790	1348477222	CCAATTTAGAAACATCGCCTGCGTCAATCACGCGCCTCGCGTGCGTCAGCGCCGCGCGGCTCCAGGTCCTGCTCCCCCAACCCCCAGCCTTTGAATGGATTCAATGTAGGAGCGCCCTCCTTCCTTCTGGGCTAGGAT	mm	chr4:48056395	FALSE	2.50583	2.34021	chr4:48056375	chr9:102582536	-1669	+	ENSMUSG00000028341	0.608696	0.0869565	4.0841	3.0488	1.60631	1.31396	1.66985	2.05957	3.56645	2.42302	0.00200803	0.0060241	0.997992	0.993976	0.0259157	0.0847571	1	1	FALSE	FALSE	0	0	0	FALSE
mm_Sliding_topH3K27Ac_slide_40_chr1:145975235	1677	1701	1010	3703	1209	3402	3444	3016	4019	3303	141622421	CCAATTTTAGATTGAGTTGCTTGGGATGGGCTCTGCTTATGAATCACTTATATGGCAGCGGGTGCTGCCAACTCAAGGCAGACTATATTTACCTTAGCCGTCACGGATCCTTCTCACTTGCAGAGTCTTGTGAGATAG	mm	chr1:145975235	FALSE	1.52952	1.49418	chr1:145975275	chr1:192647440	-49090	-	ENSMUSG00000051079	0.463768	0.0217391	1.13883	1.51328	1.48709	1.24717	1.36732	0.727201	1.32605	1.51185	0.064257	0.277108	0.935743	0.722892	0.327291	0.603625	1	1	FALSE	FALSE	0	0	1	FALSE
hs_Sliding_topH3K27Ac_slide_-80_chr12:48577365	617	575	862	1426	792	892	741	881	834	1136	165751253	CCACACGCTCTTTCCAGCCTTGGCCGAAGCCACTGTAGCGTCCCCTCTCCTCCCCCCACCCCGCTAGTCCAGACTCCAGAGCCCCACTGCAGCTTCCAGCCATCCTCCCTTTTTCTTCGCCACTTCCTGGTTACCATG	hs	chr12:48577365	FALSE	0.956845	0.901531	chr12:48577285	chr15:97998220	NA	+	CCDC184	0.615942	0.0362319	0.587655	0.889581	1.1337	1.05925	0.767933	0.947417	0.857675	1.09648	0.423695	0.740964	0.576305	0.259036	0.781518	0.918492	1	1	FALSE	FALSE	0	0	0	TRUE
hs_Sliding_topH3K27Ac_slide_40_chr8:102803243	115	196	175	286	95	159	126	116	147	213	459246902	CCACAGACTCTGCCTCTAGCTGACGTCAAAGTCCCTGTCACATGGCCAGATGAAAGCCAAGAGATCATTGGTTGTCGTAGCAACCACAGACCGGCTCTGAAATTATTTCAATAGGTCATCTGTCACTGTGGTGTGTGT	hs	chr8:102803243	FALSE	0.867746	0.847482	chr8:102803283	NA	NA	-	ENSG00000104490	0.485507	0.0217391	1.66998	1.48742	1.07778	0.743842	1.19327	1.60352	1.5787	0.910809	0.789157	0.130522	0.210843	0.869478	0.936135	0.424903	1	1	FALSE	FALSE	1	1	0	FALSE
mm_Sliding_topH3K27Ac_slide_-100_chr19:4794055	128	93	59	215	91	321	290	286	353	430	185697349	CCACAGCAGTGACTCTGGGTAGAAAGAGGGGTGAACCTACCCACCGGATTGGCCGTTCGGTAAAGTAAAAGGCTGGCGTTCCCGGAGATCCTCTTCCTGATTGGTTACCCGGAACGCCAATTACCTGAGAGGCCAGGA	mm	chr19:4794055	FALSE	0.989308	1.00809	chr19:4793955	chr11:66406037	-154	-	Rbm4	0.557971	0.0507246	0.82722	1.16732	1.07782	0.908448	1.38654	0.564378	0.997268	0.998699	0.64257	0.610442	0.35743	0.389558	0.898186	0.857115	1	1	FALSE	FALSE	0	0	0	TRUE
mm_Endogenous_chr12:112127360	230	60	101	179	47	556	310	450	291	240	513835379	CCACAGGTAGATTCCTGAGAAGACCCAAAAACCCGCCTGCGAACTGAGGAAGTGACGTCACTTCCGTCCTTGGGCCCGCCCACACTTGTGGCTCTGCCGCTCTAGCCCTCCGCGGAGTCACTGCTACTCTCTGAGGCC	mm	chr12:112127360	FALSE	1.89475	1.48893	chr12:112127360	chr14:102829271	5	-	Cinp	0.608696	0.057971	1.03332	1.88168	3.34484	2.56097	4.82385	1.87061	3.34723	2.9529	0.00200803	0.0060241	0.997992	0.993976	0.0259157	0.0847571	1	1	FALSE	FALSE	0	1	0	FALSE
mm_Sliding_topH3K27Ac_slide_-100_chr7:99785675	209	271	261	333	553	901	819	902	924	1481	1099606561	CCACAGTCTCCGGTTTCCTGGGCCCGCGGGTGGTTGTGACGGCGACCGCCGTCGGCGGGAACGCTCTCCTCCGAGTCGTTTTCCAGCGTCTCAGTTCCCGCAGCCTGGAGGGCGTGGCGGCGTGGCCGTCACCTTGGA	mm	chr7:99785675	FALSE	0.811205	0.766143	chr7:99785575	chr11:82904724	-177	-	Ankrd42	0.695652	0.130435	0.396665	0.297516	0.878377	0.831867	0.37255	0.410842	0.391696	0.855122	0.875502	0.961847	0.124498	0.0381526	0.971428	0.98216	1	1	FALSE	FALSE	0	0	0	TRUE
mm_Sliding_topH3K27Ac_slide_20_chr4:97473040	76	52	34	187	49	29	27	36	27	100	1743110140	CCACATTCACAGCTAGTTAGAGTGTGTGTAGCATTTATCAAAACTTTCTGGAGCCCCCTCACCTCATTAGCATGTGAATCTCTATTCAGCAGTTAATGTCCGTTACTGCAAGAGTGCTCAATTCTTGTTTTCAATAAG	mm	chr4:97473040	FALSE	0.396064	0.331556	chr4:97473060	chr1:61577384	28311	-	ENSMUSG00000048747	0.405797	0.00724638	0.858988	1.88554	0.418706	0.491705	1.52891	0.604007	1.37227	0.455206	0.993976	0.238956	0.0060241	0.761044	0.998602	0.570503	0.689357	1	FALSE	FALSE	0	0	0	FALSE
hs_Sliding_topH3K27Ac_slide_20_chr1:61577384	482	292	290	1131	459	911	936	984	1052	1286	1870212904	CCACATTCACAGCTAGTTAGAGTGTGTGTAGCATTTATCAAAACTTTCTGGAGCCCCTCTCACCTCATTAGCATCTGAATCTCTATTCAGCAGTTAATGTCCGTTACTGCTAGAGTGCTCAATTCTTGTTTTCAATAA	hs	chr1:61577384	FALSE	1.06767	1.00454	chr1:61577404	chr4:97473040	NA	+	ENSG00000270742	0.398551	0.00724638	0.514932	1.21742	1.0228	1.0451	1.03514	0.549977	0.866177	1.03611	0.558233	0.732932	0.441767	0.267068	0.858236	0.913817	1	1	FALSE	FALSE	0	0	0	TRUE
mm_Sliding_topH3K27Ac_slide_-20_chr6:30522920	74	97	62	274	67	94	94	79	71	149	1821792266	CCACATTTAGCTCCCTGTGACAGAGCCATTTACTCTGTCAACAGGTCCTTCAGCCCACATCCCTCTCCAGCAGCTCCTCCGGTATTCACTCGCGTCAAAGGGATGACGCACGTGACAGAGTCGAGTGCGGATTCATTT	mm	chr6:30522920	FALSE	0.92543	0.585147	chr6:30522900	chr7:129937602	-3155	-	ENSMUSG00000086854	0.536232	0.0507246	1.17186	2.02054	0.910863	0.724174	1.08873	0.805519	1.5962	0.817519	0.909639	0.12249	0.0903614	0.87751	0.980468	0.415933	1	1	FALSE	FALSE	0	0	0	FALSE
mm_Sliding_topH3K27Ac_slide_60_chr9:37015760	4392	4503	3830	9026	3906	2443	2178	2732	3417	6366	558001911	CCACCCACCACGCTTTGCGTTGCCTGGAGCCACAGCCAACGTCAGCTATTGAGGACGCCCTTAAGTGCTGAAAGGGCGGCTTTGATTGGTCCATCTTAAATTTCTTAAATGAGCCCCTACTTGTGATTCGTCCAAAGT	mm	chr9:37015760	FALSE	0.501872	0.65913	chr9:37015820	chr11:124981702	-37	+	Tmem218	0.507246	0.0434783	0.933145	1.14171	0.554074	0.58616	1.10839	0.853544	1.03743	0.580501	0.985944	0.554217	0.0140562	0.445783	0.996686	0.820032	1	1	FALSE	FALSE	0	0	0	TRUE
mm_Sliding_topH3K27Ac_slide_20_chr7:104100055	942	1309	1071	1879	628	639	501	644	548	746	324790907	CCACCCAGCGTGATGACGGAAGAGCGAGCACGGGGTGACGTAGCTCAGTTGCAACGTGCTTTAAGTCTGGGTCTGCACTCCGGTCCCATGTACGGTGTGACACTGACCGCTGTGTTCCGTGTAGTCGAACCTTCTGTG	mm	chr7:104100055	FALSE	0.985146	0.902058	chr7:104100075	chr11:78285840	24	+	ENSMUSG00000018995	0.57971	0.0797101	1.68717	1.47829	1.23673	1.1791	1.47861	1.48453	1.58273	1.20791	0.246988	0.126506	0.753012	0.873494	0.626689	0.421237	1	1	FALSE	FALSE	0	0	0	FALSE
mm_Sliding_topH3K27Ac_slide_-60_chr19:4794055	67	121	108	196	43	78	77	93	57	123	227667525	CCACCGGATTGGCCGTTCGGTAAAGTAAAAGGCTGGCGTTCCCGGAGATCCTCTTCCTGATTGGTTACCCGGAACGCCAATTACCTGAGAGGCCAGGAAGAGGTGGAAACGTCAGTAACCTGGACCTTTTATATGAAA	mm	chr19:4794055	FALSE	0.918306	0.569066	chr19:4793995	chr11:66406037	-74	-	Rbm4	0.514493	0.057971	2.2777	2.25205	0.915589	1.03271	1.53592	2.18632	2.26488	0.974152	0.682731	0.0240964	0.317269	0.975904	0.908104	0.171624	1	1	FALSE	FALSE	0	0	0	FALSE
mm_Sliding_topH3K27Ac_slide_-20_chr1:75260885	295	1398	441	1643	210	342	567	465	682	484	2087396742	CCACCTCCAAGGCGGGGTCTAGTTGCCCCTCTTGAGGCGACCCGGCCAACTGCAGGCGTGCAATGACGACATCTCCACCCCCGGCTCTTATGCCTATTTGCGTCATACTGGCGTAAGAGCCCCCTCTTAGCCGGGGAC	mm	chr1:75260885	FALSE	1.71846	1.73034	chr1:75260865	chr2:220174240	62	-	Ptprn	0.623188	0.0652174	5.38849	3.86553	1.02022	1.31223	1.38473	1.82801	4.62701	1.7244	0.0321285	0.00200803	0.967871	0.997992	0.221115	0.0626689	1	1	FALSE	FALSE	0	1	0	FALSE
mm_Sliding_topH3K27Ac_slide_-40_chr2:167460085	226	280	267	271	33	125	85	150	100	92	1679296583	CCACGAGAACAACGTAAGAGGAAGGGGGGGGGAGGGAAAGAGCGCCCCGGGGCATGCTGGTTATTGTAGTCCAGCGGTGGCCTGCTGGGAGTTGTAGTACTTGGAGTTCACATTTCCCTCAAGGAGACTCCGCCCCTT	mm	chr2:167460085	FALSE	1.35529	1.33477	chr2:167460045	chr20:48732578	2410	-	ENSMUSG00000078923	0.586957	0.0434783	6.8679	4.05739	1.9617	2.22693	6.75084	7.04298	6.89691	2.09432	0.0140562	0	0.985944	1	0.130419	0	1	1	FALSE	FALSE	0	0	0	FALSE
mm_Sliding_topH3K27Ac_slide_-60_chr14:55136340	594	2252	1334	2142	895	970	901	1140	1717	2520	113642138	CCACGCCGGGATTCCTTGATACTAGAGTCCAATCACGAAGCGGTGAAGAGTCCCCAGGAGGCGGGACAAGTCGCCTTAACAACCAGAGCGTCTTTACAGCTCCAGAGCGGAGGCGGAGGGACCAAGCCGCTGCTCCCA	mm	chr14:55136340	FALSE	0.524477	0.836686	chr14:55136280	chr14:23398715	-142	-	ENSMUSG00000023110	0.601449	0.0724638	2.03669	1.18246	0.555754	0.617884	0.654225	1.29745	1.60958	0.680581	0.96988	0.116466	0.0301205	0.883534	0.989773	0.401836	1	1	FALSE	FALSE	1	0	0	FALSE
mm_Endogenous_chr6:29298075	232	303	271	346	222	603	346	703	397	447	1800494860	CCACGCGATTGTGAGACCAATGGCCGTACGAAGAAGCCATACGTCAGCAGTGATCGTGCCGGGGATTGGTGTGAAGACCCCCGACAAGTCGGATGGGGGCGGGGCCATTAACCACTTCCGGTTGGGCGGTGCTTGTGC	mm	chr6:29298075	FALSE	1.13546	1.09063	chr6:29298075	chr7:128379352	7	+	ENSMUSG00000029767	0.608696	0.0869565	1.10476	0.770042	1.9477	2.14808	1.03015	1.06261	1.04638	2.04789	0.0140562	0.540161	0.985944	0.459839	0.130419	0.809416	1	1	FALSE	FALSE	0	0	0	FALSE
mm_Sliding_topH3K27Ac_slide_20_chr1:99944395	849	1356	1021	1448	463	1365	1112	1328	1747	1241	260688242	CCACGTAGATGCTCTGAGCAACCCGTGTATGCATACTGACATCATCAGGAGAGACTTGGAGGCAGAGGCTACTATGGTAACGGAGCAATGTGCTGGGAGACAGCCGCCTTTAATTGCTTTAACAACTTCCTGGGGCTC	mm	chr1:99944395	FALSE	1.31442	1.72868	chr1:99944415	chr5:102143810	65	-	B230216N24Rik	0.514493	0.0289855	2.3706	1.54518	1.58808	1.4616	1.80755	1.91957	1.95789	1.52484	0.060241	0.060241	0.939759	0.939759	0.310988	0.31382	1	1	FALSE	FALSE	1	1	0	FALSE
mm_Sliding_topH3K27Ac_slide_-20_chr7:138009130	1059	1494	1412	2486	1438	1045	1483	966	1042	1280	560153397	CCACTATGGGACAGCTTGCAAATTATCTGCAAAGGAACCAAACCTATTTTTAAAGATCCCTGTGCCTCGCAGCTCTAGGTGATGACATCAGAGAACCTCTAGTTCCACGTCCTAAGCCGAGCCTCGTGGTCCTCAAAA	mm	chr7:138009130	FALSE	1.69955	0.999656	chr7:138009110	chr10:124133919	-179	+	ENSMUSG00000040268	0.478261	0.0289855	0.840952	0.854148	1.17874	1.03079	0.72594	0.854742	0.84755	1.3496	0.126506	0.748996	0.873494	0.251004	0.463991	0.918492	1	1	FALSE	FALSE	0	2	0	FALSE
hs_Endogenous_chr16:57481313	717	1459	1219	663	1221	1238	1306	1113	1709	1848	2108964980	CCACTCTCACCTGCCGCCTGGGCTCGCTCCCGGCTTCTCTCCAGCCGTCGACTCCACGCCTTGCGCCTCTCGCGAGAGGAGGAGGCTCCACGGAGCGACGACTTCCGCCCTCCTTAGGGCCGTGGTCCCGTAGCTACC	hs	chr16:57481313	FALSE	1.03668	1.13562	chr16:57481313	NA	NA	-	ENSG00000005194	0.695652	0.108696	0.967207	0.26828	0.96723	0.822613	0.578851	0.869055	0.723953	1.08615	0.453815	0.817269	0.546185	0.182731	0.804725	0.929292	1	1	FALSE	FALSE	0	0	0	TRUE
hs_Sliding_topH3K27Ac_slide_-20_chr12:8235294	120659	150649	148045	202240	127643	80056	80928	82085	99803	117033	2040949960	CCACTCTGCGTTATTCCACTCTGCCTCTCCCGTAATCCCCTGGGGCACCCATCTGCTCCCCATCATGCACTTTCAGTCGTGCTTGCTCCATTGCCAGTCCCCTTTCATTCGCTCTTCCCTGCGTCCTTCAGCTTATCA	hs	chr12:8235294	FALSE	1.01436	1.0472	chr12:8235274	chr6:122824930	NA	+	ENSG00000089818	0.557971	0.0362319	0.95532	0.782819	0.987636	0.957983	0.931808	1.00962	0.970711	1.03078	0.560241	0.646586	0.439759	0.353414	0.858236	0.880951	1	1	FALSE	FALSE	0	0	0	TRUE
mm_Sliding_topH3K27Ac_slide_-80_chr14:55708255	242	346	292	352	205	197	169	177	219	281	997222393	CCAGAGAAGCAAAGTCACTACCAGAGACAGGAGTCCTACAGTTATGACTCCTTCCAGAAGCCTGTCCCACACGTGACGTGACACAGAGGGGCAAGGTGTTCCTGTACGGGTCTCAATATGGTAACGCCAGCTGCCTCT	mm	chr14:55708255	FALSE	0.882231	0.957041	chr14:55708175	chr14:24017704	-2790	-	Zfhx2	0.536232	0.0289855	1.36616	0.84836	1.01221	0.860338	1.16366	1.2399	1.20178	0.936275	0.75502	0.393574	0.24498	0.606426	0.929525	0.71449	1	1	FALSE	FALSE	0	0	1	TRUE
hs_Sliding_topH3K27Ac_slide_-20_chr8:133528937	284	264	419	448	167	203	207	243	240	358	974380834	CCAGAGGACATGAAGGCCAACGTGAACGGGATTCTCTCCCATGCATTATTCACACCAGTGCTTCCCTTTCTATTTTTAATGTTCAGCATGTAGCGGTTCCCTCTGCCAGCTATTTTTAGCATTGTTGCTGCCAGCTGA	hs	chr8:133528937	FALSE	0.848182	0.82323	chr8:133528917	NA	NA	-	ENSG00000184156	0.471014	0.0217391	1.27958	1.32542	0.818699	0.927098	1.67635	2.18402	1.93019	0.872899	0.855422	0.064257	0.144578	0.935743	0.965821	0.326851	1	1	FALSE	FALSE	0	0	0	FALSE
mm_Sliding_topH3K27Ac_slide_80_chr12:86796580	1056	900	912	2321	977	1223	1138	1410	1346	2574	981047943	CCAGATCCAGGAGAAAACGTGCTCAACGTGCAGCTCTGCTCCTACTGATTATAGCCCCACAGATGACATCGCTCCATAGTCACACCAAGTCTCCTGTGGGAGTCTTGCTCCTCGTTCTCAGTGTCTGTTACAGCTCGG	mm	chr12:86796580	FALSE	0.648538	0.642139	chr12:86796660	chr14:75726104	-18099	+	ENSMUSG00000021250	0.528986	0.0362319	0.745637	1.17374	0.686008	0.748192	1.06545	0.812567	0.959688	0.7171	0.963855	0.654618	0.0361446	0.345382	0.989773	0.880951	1	1	FALSE	FALSE	0	0	0	TRUE
mm_Sliding_topH3K27Ac_slide_20_chr13:78301630	2290	2089	2722	2702	462	141	124	220	111	120	546798192	CCAGATTGTGATACTGTCACAAAGCTGTTGCTAGGCAACAAATGTGGTTACCAGGTCTCAGCGAATAGCTGAAGGGGGAAGGCAAAGTGTTGCACCATTGTAGAGTAACCATAGCAATGACCTACTATTACAGACTAA	mm	chr13:78301630	FALSE	1.5158	1.13589	chr13:78301650	chr5:92958147	-1511	-	uc007rhc.1	0.442029	0.00724638	3.65996	2.88958	1.69648	2.50405	4.88604	5.12868	5.00736	2.10027	0.0140562	0.00200803	0.985944	0.997992	0.130419	0.0626689	1	1	FALSE	FALSE	1	0	0	FALSE
mm_Sliding_topH3K27Ac_slide_80_chr6:120786110	1041	1178	1146	542	1489	15480	5283	15176	7534	5028	650440079	CCAGCAGGTGTCAGTGACCCTGCTTCGTTTCCAGTTGACCGAGCCGCTGGCTTCCGGCTTGGCATTACGCCCGGGCCCCGCCCCTACGCCGCCGTGACGTAGGCGCGCCAGGGTGACCTCACCGTCCAACATGGCGGC	mm	chr6:120786110	FALSE	1.5413	1.84002	chr6:120786190	chr22:18121403	23	+	Bcl2l13	0.688406	0.108696	0.640369	0.179844	4.44516	4.12254	0.689159	0.66996	0.67956	4.28385	0	0.849398	1	0.150602	0	0.944601	1	1	TRUE	TRUE	0	1	0	FALSE
mm_Endogenous_chr8:126813830	499	379	450	1278	449	602	909	745	845	1111	1107410311	CCAGCATGAGCTTCCCCGTGTCTCGTTCCAGGCTGGTCCATATGGATGGGTATTTTTAGATAGTTGTTTTATTGTGTACATAAAATTTGGTCTCCTGCTTAACATAAGCATTTTGCATATTTGATGTGGTCTTTATCA	mm	chr8:126813830	FALSE	1.20019	0.933976	chr8:126813830	chr1:230300977	-5172	+	ENSMUSG00000089704	0.391304	0.0144928	0.683239	1.40629	0.782337	0.915893	1.09551	0.872419	1.04477	1.06709	0.493976	0.544177	0.506024	0.455823	0.831284	0.81295	1	1	FALSE	FALSE	0	0	0	TRUE
mm_Sliding_topH3K27Ac_slide_40_chr16:31275570	76	64	56	225	65	104	145	97	114	183	339318544	CCAGCCCTCTCCCATCGCCCTATGAGGCCATTTTTATATTGCTGTCTTATGACAGAAAACTGAGGCTCACGGGTGACTCACTCCACAAAGATAAGAGATGTTAGCTGACTGAACAATTAGTCATTTAATTCACATTTC	mm	chr16:31275570	FALSE	1.1623	0.764974	chr16:31275610	chr3:195270376	287	-	Ppp1r2	0.427536	0.0144928	0.796978	1.71025	0.820528	0.723974	1.15256	0.749953	1.25362	0.963638	0.704819	0.337349	0.295181	0.662651	0.912309	0.660651	1	1	FALSE	FALSE	0	0	2	TRUE
hs_Sliding_topH3K27Ac_slide_40_chr16:57481313	72	121	126	95	346	997	728	1058	797	729	1188711159	CCAGCCGTCGACTCCACGCCTTGCGCCTCTCGCGAGAGGAGGAGGCTCCACGGAGCGACGACTTCCGCCCTCCTTAGGGCCGTGGTCCCGTAGCTACCGGTCGCGTCGCCGTGGGCGACGTGCCCGCTTCCAAAATGG	hs	chr16:57481313	FALSE	1.46489	1.34253	chr16:57481353	NA	NA	-	ENSG00000005194	0.695652	0.144928	0.283067	0.135656	1.9746	1.98226	0.205126	0.316996	0.261061	1.97843	0.0160643	0.973896	0.983936	0.0261044	0.137528	0.982481	1	1	FALSE	FALSE	0	0	0	FALSE
mm_Sliding_topH3K27Ac_slide_-100_chr5:72378455	858	970	1219	2651	855	2465	2293	2825	2735	2630	2085071682	CCAGCCTGGGTTTCAGCCTTTCGTCTGCCCCTTGGTACCAATTACTAACAGACACCTGCTGATCTCACATCTCCATCCCCGCTCCATTCTCACTGGAAGGAATCTCTTTTCTCCTGTGATGCCAATTCATGATAAATG	mm	chr5:72378455	FALSE	1.27894	1.27701	chr5:72378355	chr4:47280792	-46472	-	ENSMUSG00000080736	0.485507	0.0144928	0.918301	1.53192	1.35323	1.46712	0.989201	1.24107	1.22511	1.41018	0.0943775	0.365462	0.905622	0.634538	0.391775	0.68335	1	1	FALSE	FALSE	0	0	0	FALSE
hs_Sliding_topH3K27Ac_slide_-100_chr7:127526137	11023	13644	17844	29011	7937	12608	14121	13044	16804	17214	1201218055	CCAGCCTTCTTACTAGCTCTTTGATGGGTGGAGCCTCTCTTGTTCCCTGCTAGGGCCCCTTAGTGACAACCTTAGTTTAAATCCTCACCATGTATCAACATCTACATCTGCTGATTTGAGGCTGTTGCCTTCTCCATG	hs	chr7:127526137	FALSE	1.20333	1.19874	chr7:127526037	NA	NA	+	ENSG00000197157	0.478261	0	1.39144	1.80592	1.05749	1.03498	1.36901	1.95702	1.66301	1.20103	0.259036	0.108434	0.740964	0.891566	0.644867	0.395173	1	1	FALSE	FALSE	0	0	0	FALSE
mm_Sliding_topH3K27Ac_slide_20_chr15:101076845	217	238	324	458	295	359	258	328	418	422	699921324	CCAGCGCCAAAGGAAGCGTTGGCTCAACGACGATTTGCATGCTCTCACGCTATTGGCTGCGAGGGCGGCGCCGCAGCCAATGGCTGCAGCGGTGTTTACAGCGCGGCTTGGGTGATGTAATGGAATCCTGGCTAGCCC	mm	chr15:101076845	FALSE	0.896828	1.21634	chr15:101076865	chr12:52426818	-20391	+	Nr4a1	0.608696	0.0869565	0.653032	0.767069	1.22827	1.06161	0.725106	0.956053	0.840579	1.14494	0.34739	0.75502	0.65261	0.24498	0.731201	0.918492	1	1	FALSE	FALSE	0	1	0	TRUE
mm_Sliding_topH3K27Ac_slide_-20_chr2:38806145	583	710	467	1221	544	1009	851	883	1086	999	1364591171	CCAGCTCTGCAAGTGTGAGTGAATCTCGCTTTGGCGGCTGCCCAGATGACGTCAGACACTGTACAAGCCTTATCTGCCCTAGCTTCTGTCTCACAATGGGTGCCGTCACAGGCCCTGTGTTCTTGTGCCAAGCCAGCC	mm	chr2:38806145	FALSE	1.24959	1.33493	chr2:38806125	chr9:127563048	11243	+	ENSMUSG00000083776	0.565217	0.0289855	1.05643	1.10894	1.45827	1.20725	1.05641	0.747269	1.08268	1.33276	0.136546	0.506024	0.863454	0.493976	0.474457	0.790247	1	1	FALSE	FALSE	0	1	0	FALSE
mm_Sliding_topH3K27Ac_slide_-20_chr2:139503255	219	219	134	668	230	203	376	244	293	316	1157783925	CCAGGATGAGCCCCCAGACTCGAGTCTACCAAGCTGAGAGTCACCCAGCATCCCACTGACGTCCGAGCGCCTTCGCAGCGCACACCGTGTTCTTCGCAGCCTCCCACGCGACACCTGCGCACTTAAGTAGACGCGCGC	mm	chr2:139503255	FALSE	1.74543	1.13861	chr2:139503235	chr20:13201228	-235	-	ENSMUSG00000085071	0.637681	0.101449	0.770719	1.43496	0.927514	1.05464	0.938598	0.50715	1.10284	1.44202	0.0863454	0.491968	0.913655	0.508032	0.384467	0.786278	1	1	FALSE	FALSE	0	0	0	FALSE
mm_Sliding_topH3K27Ac_slide_60_chr9:77765105	2154	3883	2583	8830	1669	2275	2275	2117	3844	2104	1871123056	CCAGGATTGGTTCCAAGGCCGCATGACATCATAGCGCTTGATCCTGCCTCCGGGCTCGGATTGGCTGGCCGCGCCATTGTGACGTCACGGTCAGCCCACGCCGGGGTTGAAGCTGCCGGGCGCCTTCCTCTTGCATCG	mm	chr9:77765105	FALSE	1.58613	2.24352	chr9:77765165	chr6:53213871	55	+	ENSMUSG00000032349	0.644928	0.0942029	1.88317	2.61394	1.56116	1.37429	1.27219	1.34718	2.24856	1.91482	0.0180723	0.0240964	0.981928	0.975904	0.147019	0.171624	1	1	FALSE	FALSE	0	2	0	FALSE
mm_Endogenous_chr11:76057240	334	272	467	209	105	754	534	1036	414	227	1918052890	CCAGGCAGAGGGACACCCCGCCCACCAAACCGGGAAGGATCGTCGGGTGACGTCACTAACACTCGACCGCGCGCTCGGGTGAGGTAGCGCGCGCCAGGGGAAAGATGGCAGCGCCGGCGAAGGGCATGTGGTGCTCCC	mm	chr11:76057240	FALSE	3.45078	2.23958	chr11:76057240	chr17:685586	3	+	Rnmtl1	0.688406	0.115942	2.09681	0.983441	4.79575	6.23356	3.1356	3.87157	3.50358	5.51466	0	0.0060241	1	0.993976	0	0.0847571	1	1	TRUE	TRUE	0	1	0	FALSE
mm_Sliding_topH3K27Ac_slide_-100_chr4:129784790	409	515	773	2058	409	578	287	557	624	1866	1820374494	CCAGGCCCGAGGTCCGCTGCAGGTCACGAAAAATAAAAACAAACGAGCCACTACGGTCAACAACACTTCCGGACACTCCTACCCAGCCCTCTGTAAGGTACCAGCTCACCGCCTGTGACTTCCGTTTGTTGACCGGAA	mm	chr4:129784790	FALSE	0.225617	0.410644	chr4:129784690	chr1:32110590	-209	+	Pef1	0.550725	0.0652174	1.01921	2.48607	0.447226	0.407705	0.985743	1.64519	1.75264	0.427466	0.993976	0.0863454	0.0060241	0.913655	0.998602	0.352047	0.689357	1	FALSE	FALSE	0	0	0	FALSE
hs_Sliding_topH3K27Ac_slide_20_chr20:62612464	261	243	382	233	155	207	164	299	238	256	2027164816	CCAGGGAATCAAAAGTGGGCGGGGCGTGTGCGGACTGAGCGCTCTGCTTCCGGGGCGCGGGTGACGCGACGACGGCGACACTTTGCTACGGAGTGCATCGGACGTCGAAGCCTAGAGTCTCTGCGTCTTTCCCTCTTC	hs	chr20:62612464	FALSE	0.939736	1.14164	chr20:62612484	chr2:181336040	NA	+	ENSG00000101161	0.637681	0.123188	1.26898	0.742703	1.16746	1.59527	1.65986	2.14531	1.90259	1.38136	0.106426	0.0662651	0.893574	0.933735	0.41851	0.326851	1	1	FALSE	FALSE	0	0	0	FALSE
mm_Sliding_topH3K27Ac_slide_-100_chr8:108130750	315	890	655	587	303	376	401	638	819	788	775714164	CCAGGGAGGAGGCTGGCAGGAAGTGAGGCCACTAAGTAGTCTCCACCCGGTTCCGGGGTGGGGTGGGGGTCTTAGGCCATAGCAGGCCCCCCTCCCCTTTTCAGTGGCAGTTCTGGTTGGCGGCTGCCAGATGACGTC	mm	chr8:108130750	FALSE	0.746483	1.27629	chr8:108130650	chr16:67564359	1422	+	Fam65a	0.644928	0.0289855	2.37754	0.957165	0.688927	1.10585	1.02478	1.88173	1.66735	1.01139	0.614458	0.104418	0.385542	0.895582	0.888931	0.392195	1	1	FALSE	FALSE	0	0	0	FALSE
mm_Sliding_topH3K27Ac_slide_40_chr13:75227245	308	615	141	1226	245	398	826	460	967	426	1683643791	CCAGGTAGATCTGACGTCAAGAGATGGCTTTCGTCGATTTGACGTGTAAACACTCATTTCTATTCTGGTTGGTAAGGCTGGGGCTCCACTCAGTCGGGAGACTGAAGCACTTTAGTGAGCGCTCGCTCTCGCCGCCCA	mm	chr13:75227245	FALSE	2.84428	2.78747	chr13:75227285	chr5:95769021	52	+	ENSMUSG00000021587	0.528986	0.0652174	2.03184	2.47238	1.34892	1.47486	1.23922	0.500971	2.25211	2.81587	0.00200803	0.0240964	0.997992	0.975904	0.0259157	0.171624	1	1	FALSE	FALSE	0	1	0	FALSE
mm_Endogenous_chr5:126064405	710	951	746	922	265	390	432	453	494	665	475969725	CCAGGTGGCATGTGGTGGCGTGTGCAGTCAGATTATTTTTATTTATGATCTCTGAGTCACTCCCGTCTCCATGGTGATGGGTGCGCTGAAGGCAGAGGGAGGGAGTGAGTCCCTGCATTAGTAAATGACCCAGCGACA	mm	chr5:126064405	FALSE	0.952936	0.912217	chr5:126064405	chr12:125757218	-38425	+	uc008zrt.2	0.521739	0.0289855	2.90479	1.719	0.846748	0.93042	2.64105	2.45049	2.54577	0.932577	0.763052	0.0120482	0.236948	0.987952	0.929525	0.106055	1	1	FALSE	FALSE	0	0	1	FALSE
mm_Sliding_topH3K27Ac_slide_80_chr1:154615385	628	652	708	1171	347	689	630	685	772	1191	994110628	CCAGTGCTTTCAGAGACTGAGTAGGTATGGATGGTCCAGCCCAGTTTGAATAACCTGTAGGAAATAAAGTAAGCTGCCACCTACAGGTCGTGCGGGTTACTACATCATCCAGAGCCCTGTTCATATTAAGCTATTCTT	mm	chr1:154615385	FALSE	0.775944	0.795973	chr1:154615465	chr1:183602988	-83	+	ENSMUSG00000008475	0.456522	0.0144928	1.52089	1.66732	0.835254	0.785563	1.784	1.77608	1.78004	0.810409	0.917671	0.0803213	0.0823293	0.919679	0.985721	0.344248	1	1	FALSE	FALSE	0	1	0	FALSE
hs_Sliding_topH3K27Ac_slide_-60_chr6:34855860	7942	5782	8001	9592	1720	6238	4607	5691	6355	5994	1872376225	CCATCACGGATAGGATTGGAGGGGAGAGGAGATCGCGGAGATGCCTGAGGCAGAAGCTCGGAAACCCGAGCTGCACAGGCCAGGATCTTACTTCCTGTCGTCGCGCAGCGATGACATCACCCCTACCGCTCTCCTGAG	hs	chr6:34855860	FALSE	1.12747	1.30194	chr6:34855800	chr17:28044725	NA	-	ENSG00000064995	0.601449	0.0724638	2.721	2.75532	1.50259	1.2968	4.55161	4.04925	4.30043	1.3997	0.0983936	0.00401606	0.901606	0.995984	0.396927	0.0770232	1	1	FALSE	FALSE	0	1	0	FALSE
mm_Sliding_topH3K27Ac_slide_20_chr6:122824930	2158	2715	3216	5125	2894	2559	2545	2824	2665	3634	662237280	CCATCCCTCCCCCTGAGACATCGTCTGCTCCTCGTCATCCGCAATCCATTCATGCCTGCTCCATCTGTTACTCTTGCTGCGACCTTTGGCTTGTAATCCTCCACGCGCGCGTCCGCACACGCACACGGCACGCTCCCC	mm	chr6:122824930	FALSE	1.02732	0.900544	chr6:122824950	chr12:8235294	396	+	Necap1	0.608696	0.0869565	0.759366	0.874957	1.01671	1.06141	0.735049	0.967334	0.851192	1.03906	0.544177	0.746988	0.455823	0.253012	0.855776	0.918492	1	1	FALSE	FALSE	0	0	0	TRUE
hs_Sliding_topH3K27Ac_slide_-80_chr13:58204211	16787	23032	21329	34284	15027	22375	22134	22170	28568	33402	1024333328	CCATCTAACTGATCTAATCAATGACTCCGAAGAGCCGGGGCTCCTGGCCCCGCCCCCGCCATCCTCTTCTCCGCCTCCCATTGGACGCGGGCCGAGAAGGCAGGGCCTTGCTCCTCGCTCGGATTGGCTGACAGGGAA	hs	chr13:58204211	FALSE	0.972051	1.05027	chr13:58204131	NA	NA	+	PCDH17	0.637681	0.0724638	1.24062	1.12722	0.967168	0.906558	1.1012	1.23554	1.18392	1.01116	0.614458	0.407631	0.385542	0.592369	0.888931	0.722455	1	1	FALSE	FALSE	0	0	0	TRUE
mm_Endogenous_chr4:48300480	718	695	910	1330	155	472	482	544	595	347	1141625843	CCATCTCTGTTTCCATGGAGAAGTATGCCAGGATGCGTTTGCCTCCATGGAAACGGATGACTGTCTCTTTCTACTCACACAACTAATTAAATCGAACCCTTTCTGAGCAGCCCATTGTCCTGGAGGAAACTGAAGAGG	mm	chr4:48300480	FALSE	2.0376	2.10562	chr4:48300480	chr9:102871050	7738	+	ENSMUSG00000028344	0.471014	0.0217391	3.62938	4.23947	1.96392	2.14127	4.56621	5.11056	4.83839	2.07161	0.0140562	0.00200803	0.985944	0.997992	0.130419	0.0626689	1	1	FALSE	FALSE	0	0	0	FALSE
mm_Sliding_topH3K27Ac_slide_20_chr13:69900465	9749	17243	18233	29828	12509	20515	14222	20408	23625	22854	871604045	CCATCTGTCTGGCTCCCTTGCCTGGCTCCCACACCTCTTGCAGCCTCCAGTCTGGGCTCCTCTCCAAGGCAGTGCTTAGGCAATGATGAGCTAGCTTGCGCTTGGAACCCAAGCGGGCTATTTTTAAAAGTACCACAC	mm	chr13:69900465	FALSE	0.912852	1.26941	chr13:69900485	chr5:6430764	21730	-	Ube2ql1	0.557971	0.0144928	1.11576	1.17813	1.29605	1.21967	0.768247	1.2688	1.14694	1.25786	0.192771	0.447791	0.807229	0.552209	0.56322	0.754672	1	1	FALSE	FALSE	0	0	0	TRUE
mm_Sliding_topH3K27Ac_slide_80_chr6:122824930	817	552	571	1872	1955	1975	1759	1995	2302	2665	1930255765	CCATCTGTTACTCTTGCTGCGACCTTTGGCTTGTAATCCTCCACGCGCGCGTCCGCACACGCACACGGCACGCTCCCCCCCCTCCCCCCGCGCTTCTGATCCCGCCTGACACTTGTCCGGAATGGTAGTTTTGCTGTC	mm	chr6:122824930	FALSE	0.968212	1.06072	chr6:122825010	chr12:8235294	516	+	Necap1	0.623188	0.0942029	0.228545	0.473097	1.06999	1.02246	0.411945	0.254243	0.350821	1.04623	0.526104	0.971888	0.473896	0.0281124	0.840836	0.982187	1	1	FALSE	FALSE	0	0	0	TRUE
mm_Sliding_topH3K27Ac_slide_-60_chr14:120674715	780	594	401	1796	665	1407	1772	1674	2051	2304	551284845	CCATCTTAGGAGTTTCGTGATTCCCGGAGTGTTTATGATGCAACTCCCAGCTACGGGCTGGGTGTCTCGAAGCGTATTTGTCTGAGCTACCCCTCTCTGTGCTCTGCCAATTATGTGCCACTTTGTCTCGGAGCTATG	mm	chr14:120674715	FALSE	1.12819	1.09314	chr14:120674655	chr13:97874372	-295	+	Mbnl2	0.514493	0.0434783	0.72301	1.33437	0.881704	0.992374	1.15621	0.524906	1.02869	1.11067	0.393574	0.560241	0.606426	0.439759	0.753687	0.820174	1	1	FALSE	FALSE	0	0	0	TRUE
hs_Sliding_topH3K27Ac_slide_-20_chr9:104160960	83	39	51	60	84	65	37	30	65	69	536955889	CCATCTTCGATGAGATCCACGGGCCTGAGCGCAGCCTTCAGCCAGCAGTGACGCGCCCAGACCAGCCAATCGGATACAATCCCAGTGGCAAGAGCTTTCTTTTTCCTGTAGGCTCCCTCGCCCTTTGCACGCTGGGAA	hs	chr9:104160960	FALSE	0.786601	1.1568	chr9:104160940	chr4:49533995	NA	-	MRPL50	0.586957	0.057971	0.375807	0.352909	1.36011	0.593847	0.974008	0.528506	0.751257	0.976981	0.682731	0.815261	0.317269	0.184739	0.908104	0.928905	1	1	FALSE	FALSE	0	0	0	TRUE
mm_Sliding_topH3K27Ac_slide_-100_chr10:121062745	85	57	46	150	77	180	175	147	176	186	210071496	CCATTAAGTCAAGAATAATCAAACAATGTGGAAAATTCCTCCACACCTACTTAAGCCTGTTTGAGACCGACTGAATCTTTCCAGCCTTTTAACATCAAGTTGACAAGTCGCTTTAATACAACGTAACTTCCCCCAGTA	mm	chr10:121062745	FALSE	1.38015	1.16196	chr10:121062645	chr12:64799064	-827	-	Xpot	0.391304	0.0217391	0.599189	0.96248	1.39724	1.07946	1.08816	0.520027	0.804092	1.27106	0.180723	0.777108	0.819277	0.222892	0.544707	0.921206	1	1	FALSE	FALSE	0	0	0	TRUE
mm_Sliding_topH3K27Ac_slide_-20_chr8:69964015	364	492	656	2308	508	628	1112	816	780	1196	861451881	CCATTAGGGTTCTTCTAAGAGCACCCATGTGCCAACCACACAACACAACACTAGATGTCAGCAGAGGTAGACAGACTCATCTAGCAACCTGGAAACCTGAGAAGAAATCCCCATGTACGTCACAGTTTATTTCTGTTA	mm	chr8:69964015	FALSE	1.36388	0.800859	chr8:69963995	chr8:17999464	-50681	+	Nat1	0.449275	0.00724638	0.783937	2.24473	0.758123	0.931883	0.706319	1.12409	1.51433	1.08237	0.461847	0.168675	0.538153	0.831325	0.808958	0.497474	1	1	FALSE	FALSE	0	0	0	FALSE
hs_Sliding_topH3K27Ac_slide_-60_chr5:124242576	136	60	65	314	135	165	190	176	163	244	335993792	CCATTCCCTGGAGAAACTTTATGATTTGGTTACTGCAGCAGGGCGCGCTGCTCCTTGGCTGTGGTAGCCTTGAGTCAGTGCCAAACAATGAAGCAATGCTATTATTAGCCTTTCCATTCAATGGCGACAAAACAGTCC	hs	chr5:124242576	FALSE	1.14226	0.820334	chr5:124242516	chr18:55293815	NA	+	ENSG00000249423	0.478261	0.0217391	0.359747	1.14918	0.97635	0.985202	0.993044	0.41912	0.754462	0.981298	0.678715	0.813253	0.321285	0.186747	0.908104	0.928905	1	1	FALSE	FALSE	0	0	0	TRUE
mm_Sliding_topH3K27Ac_slide_-100_chr11:50105960	722	712	955	613	89	356	225	393	303	303	840295686	CCATTGTTTTCCGCGCCGCTGCCGCCGCCATCTTAAAATTGTTTTCGGGGCTTTCGGAAGAGGGCGGGGCCTGGGCCGGCGAACTCTGCGTCACTGCTGATGGACCGAAGCTCTAGCCAATCAAAGGAAACCCGCTGC	mm	chr11:50105960	FALSE	1.08929	1.22798	chr11:50105860	chr5:179159699	-78	-	Maml1	0.601449	0.0942029	6.47544	3.403	1.69636	1.77155	7.9967	9.34055	8.66862	1.73395	0.0301205	0	0.96988	1	0.209744	0	1	1	FALSE	FALSE	0	0	0	FALSE
hs_Sliding_topH3K27Ac_slide_-20_chr21:34437086	943	1400	1254	2100	530	698	885	808	771	1158	663335864	CCCAAACACATCGGCCTGTTTGTTCTCTTTCATCCCCGCTCTTCCTGTTGCATTCTGCCGGTTCAATGGGGAAGGAGTGAAACCGGATGGCTGGACCCAGTGCGGGGAAATGACTTCAGAGCCACCTTTGTTTCCCTC	hs	chr21:34437086	FALSE	1.12108	0.817596	chr21:34437066	chr16:91263240	NA	+	OLIG1	0.543478	0.0362319	2.13812	1.95765	0.870278	0.953027	1.75388	2.05959	2.04788	0.969338	0.694779	0.0481928	0.305221	0.951807	0.912309	0.28476	1	1	FALSE	FALSE	0	0	0	FALSE
mm_Sliding_topH3K27Ac_slide_-80_chr11:97311435	50	69	37	365	87	188	169	200	193	226	1837673458	CCCAAGTAGGCTGGCATCCCCAGATGTCAACATCTGGGAGCTCCCACGACCCGCCATCTCCAGTCAGCCAGAGGGTGGGGCCCAGGCATTCCTGTGGTTGGGAGCCAAGGCTGGAGGCCAATCGGGTGGCGGCAGCTG	mm	chr11:97311435	FALSE	1.09693	1.04868	chr11:97311355	chr17:36621168	-198	+	Arhgap23	0.652174	0.0289855	0.641962	2.07284	1.20105	1.20872	0.566519	0.370204	1.3574	1.20488	0.25502	0.25502	0.74498	0.74498	0.64138	0.593951	1	1	FALSE	FALSE	0	0	0	FALSE
hs_Sliding_topH3K27Ac_slide_-100_chr21:19796818	169	133	143	588	202	253	213	275	273	408	445951355	CCCAATTGTCTAGTAAAGCTCTCAGCCCAGCCAAACGTTGTGGAGAAACTATACAGCAATTCCTTTTTGCAACACTCTTGTTTTGACATCTCAGTGAGTCTATTTACATGTAGTAATTTCTCAGTGCCAGTTAAAGTC	hs	chr21:19796818	FALSE	0.76581	0.821666	chr21:19796718	chr16:79109475	NA	-	ENSG00000154646	0.398551	0.00724638	0.532942	1.43819	0.895306	0.920608	0.824705	0.616231	0.985567	0.907957	0.795181	0.628514	0.204819	0.371486	0.939063	0.872815	1	1	FALSE	FALSE	0	0	0	TRUE
mm_Sliding_topH3K27Ac_slide_-80_chr6:115803490	1682	2733	4352	4322	3933	6066	5668	5815	6979	8477	718074777	CCCACACAGCAGCCTTCCCGCCACCGCTTCAGCTACAGATGCCACAGCCAGGGTCCCGCCAATCAAACCCTCTGTCGTCAAGACTCCCCGCCCCACCCACCTTTCCGGACCAATCGCTCGTGTCATACTTACGCTTCC	mm	chr6:115803490	FALSE	0.98082	1.01098	chr6:115803410	chr3:129158957	-157	+	ENSMUSG00000030323	0.615942	0.0652174	0.562465	0.54294	1.03317	0.936936	0.421566	0.963217	0.692391	0.995902	0.646586	0.843373	0.353414	0.156627	0.900134	0.944601	1	1	FALSE	FALSE	0	0	0	TRUE
mm_Sliding_topH3K27Ac_slide_-40_chr10:80729705	104	170	163	138	242	553	443	569	569	696	773208155	CCCACACCCGGGAAGCCCGGAGGAGATGGGCGGCCGCCATGACGCTGGCCGGCCGCTCGCACGTGCAGACTTCCGTGTTACGTCAGCCCTCCAGATCGGCTTTGGAGGTGTTGGAGGCGCCGCGGCCTTCTGGGAAAT	mm	chr10:80729705	FALSE	0.933676	1.00391	chr10:80729665	chr19:3762616	-54	-	ENSMUSG00000034932	0.681159	0.108696	0.568608	0.281744	1.14717	1.11662	0.423625	0.586316	0.50497	1.13189	0.363454	0.931727	0.636546	0.0682731	0.739619	0.970749	1	1	FALSE	FALSE	0	1	0	TRUE
hs_Sliding_topH3K27Ac_slide_40_chr22:41844392	3070	4587	3461	6155	3537	6730	6657	6481	8012	8184	1133322949	CCCACACTCTGAGCGTCGCAACCCCGGGGGCACCTCCAGGGACTACTTGCCTTGTGCGTCAGCGAGTGACAGCGTCACACACACGCCCCCTCCCGCACATGCCCGCTGCACCCTCCCTTTCCCCCTCCCCTTCCCTTC	hs	chr22:41844392	FALSE	1.1932	1.20218	chr22:41844432	chr15:81690335	NA	-	TOB2	0.673913	0.0652174	1.04972	0.859774	1.1873	1.08163	0.855592	0.851777	0.954747	1.19769	0.263052	0.658635	0.736948	0.341365	0.651438	0.881517	1	1	FALSE	FALSE	0	0	0	TRUE
hs_Sliding_topH3K27Ac_slide_-100_chr17:71766832	122	204	214	420	128	281	218	335	255	202	1777482944	CCCACATCCACTGCCTGGCCGGGCTGGAACAGGATGGGGCGCAGACAGGCAGGTTCTCGGCAGACAGGCTCTGTGAAGAAGGTCTCATGCTTCCCCCATCCCACCCCAAGGGAGTGGCGAGGGAAGGGAAGCCTGTGA	hs	chr17:71766832	FALSE	1.58309	1.55018	chr17:71766732	chr11:114059780	NA	-	ENSG00000177338	0.637681	0.0289855	1.29003	1.62118	2.00847	2.26514	0.939536	1.45533	1.4556	2.13681	0.0140562	0.190763	0.985944	0.809237	0.130419	0.514446	1	1	FALSE	FALSE	0	0	0	FALSE
mm_Sliding_topH3K27Ac_slide_20_chr11:76057240	160	151	216	161	43	231	109	249	92	84	780307718	CCCACCAAACCGGGAAGGATCGTCGGGTGACGTCACTAACACTCGACCGCGCGCTCGGGTGAGGTAGCGCGCGCCAGGGGAAAGATGGCAGCGCCGGCGAAGGGCATGTGGTGCTCCCTGGGATCATTGCTGCGGGTG	mm	chr11:76057240	FALSE	1.90348	1.34494	chr11:76057260	chr17:685586	43	+	Rnmtl1	0.666667	0.115942	2.84242	1.8499	3.97049	4.04876	3.66788	4.37265	4.02026	4.00963	0	0.00401606	1	0.995984	0	0.0770232	1	1	TRUE	TRUE	0	1	0	FALSE
mm_Sliding_topH3K27Ac_slide_20_chr1:44204735	186	95	95	259	118	691	546	596	627	341	654732172	CCCACCACATTTAAATTCCGCTGTTCTTTCGGGAGACCGGGTCCGCTCCGGAAGTGCGTCAGCGCCGTGTTCCTCCTTCAAGCCCTGGTGACAGCGGGTTCCAGGCGGAGAGCGGTGGGCTCTGCGTGAGTTGGTGGC	mm	chr1:44204735	FALSE	2.34877	2.25791	chr1:44204755	chr13:103498394	22	+	ENSMUSG00000026048	0.630435	0.0869565	0.65166	1.08445	2.92573	2.38723	1.5538	0.700811	1.1273	2.65648	0.00200803	0.46988	0.997992	0.53012	0.0259157	0.771816	1	1	FALSE	FALSE	0	0	0	FALSE
[truncated: 2,625 more rows]

## Sheet: KEY
Column Name	Description
label	Full label
Un1_E	cDNA read counts, enhancer assay, unstimulated condition, biorep1
KCl1_E	cDNA read counts, enhancer assay, stimulated conditioned, biorep1
Un2_E	cDNA read counts, enhancer assay, unstimulated condition, biorep2
KCl2_E	cDNA read counts, enhancer assay, stimulated conditioned, biorep2
DNA_E	DNA read counts, enhancer assay
Un1_P	cDNA read counts, promoter assay, unstimulated condition, biorep1
[truncated: 40 more rows]
