# Supplementary material for: High-throughput functional comparison of promoter and enhancer activities
Source: HighWire-hosted journal article supplement (doi:10.1101/gr.204834.116), 2016-06-16
Supplement: Supplemental_Table_S2.xlsx [file Supplemental_Table_S2.xlsx]

## Sheet: KEY
Column Name	Description
name	TF name associated with motif
X.Motif	Full sequence of motif
ratio	Ratio of motif counts within the gene to flanking sequences
CpG	Number of CpGs in single motif

## Sheet: Motif Data
name	X.Motif	ratio	CpG
ETS	SMGGAAGT	53.819	0
EGR	CGCNCMGGAA	21.926	1
GATA	YMATCNNNNNGCGM	21.926	1
KLF	GGGYGTGNY	19.933	0
STAT	TCCCRGAAR	19.933	0
*	RAACYRCNNNNCCC	19.933	0
ETS	CCGGAARY	18.936	1
AP2	TCCMANNWGGC	17.94	0
NRF	RCGCANGCGY	16.943	2
*	ACTACNNNNCCC	14.95	0
NFY	GCTNWTTGK	13.953	0
*	RGGAGTTRW	13.953	0
*	GTGANNNCAC	10.963	0
*	WCAAMKYCCAG	10.963	0
IRF	AACYRNAAC	9.966	0
KLF	GGGYGNNGTC	9.966	0
POU	TTGYANNTTT	9.966	0
ETS	SCGGAAGY	9.634	1
IRF	TGTRNTTT	8.97	0
REST	GGTGCT	6.977	0
RFX	KYTCCNNRRNAAC	6.644	0
NFY	TGATTGRY	5.98	0
*	TTTNCTA	5.98	0
NHLH	GCTGCT	5.799	0
CREB	ACGTSACT	5.648	1
AP1	TGCTGAY	5.482	0
HOMEO	CAGNTGT	5.41	0
NFY	YGACYAAT	5.315	0
FOS	GTGACGY	4.514	1
ZBTB	MTCGCGAGA	4.485	2
RHR	GTTTCC	4.153	0
CREB	TGCRTCA	3.854	0
PAX	CGTSACG	3.844	2
NFY	YNATTGGT	3.559	0
* Did not have a good enough match to assign a TF name
