# Supplementary material for: High-throughput functional comparison of promoter and enhancer activities
Source: HighWire-hosted journal article supplement (doi:10.1101/gr.204834.116), 2016-06-16
Supplement: Supplemental_Table_S3.xlsx [file Supplemental_Table_S3.xlsx]

## Sheet: KEY
Column Name	Description
label	Full label
KCl1_E	mean cDNA read counts collapsed across barcodes, normalized to negative controls, enhancer assay, stimulated conditioned, biorep1
KCl2_E	mean cDNA read counts collapsed across barcodes, normalized to negative controls, enhancer assay, stimulated conditioned, biorep2
KCl3_E	mean cDNA read counts collapsed across barcodes, normalized to negative controls, enhancer assay, stimulated conditioned, biorep3
DNA_E	mean DNA read counts collapsed across barcodes, normalized to negative controls, enhancer assay
KCl1_P	mean cDNA read counts collapsed across barcodes, normalized to negative controls, promoter assay, stimulated conditioned, biorep1
KCl2_P	mean cDNA read counts collapsed across barcodes, normalized to negative controls, promoter assay, stimulated conditioned, biorep2
KCl3_P	mean cDNA read counts collapsed across barcodes, normalized to negative controls, promoter assay, stimulated conditioned, biorep3
DNA_P	mean DNA read counts collapsed across barcodes, normalized to negative controls, promoter assay
Un1_E	mean cDNA read counts collapsed across barcodes, normalized to negative controls, enhancer assay, unstimulated condition, biorep1
Un2_E	mean cDNA read counts collapsed across barcodes, normalized to negative controls, enhancer assay, unstimulated condition, biorep2
Un3_E	mean cDNA read counts collapsed across barcodes, normalized to negative controls, enhancer assay, unstimulated condition, biorep3
Un1_P	mean cDNA read counts collapsed across barcodes, normalized to negative controls, promoter assay, unstimulated condition, biorep1
Un2_P	mean cDNA read counts collapsed across barcodes, normalized to negative controls, promoter assay, unstimulated condition, biorep2
Un3_P	mean cDNA read counts collapsed across barcodes, normalized to negative controls, promoter assay, unstimulated condition, biorep3
E_U_1	Enhancer activity, unstimulated condition, biorep1
E_U_2	Enhancer activity, unstimulated condition, biorep2
E_U_3	Enhancer activity, unstimulated condition, biorep3
E_K_1	Enhancer activity, stimulated condition, biorep1
E_K_2	Enhancer activity, stimulated condition, biorep2
E_K_3	Enhancer activity, stimulated condition, biorep3
P_K_1	Promoter activity, stimulated condition, biorep1
P_K_2	Promoter activity, stimulated condition, biorep2
P_K_3	Promoter activity, stimulated condition, biorep3
P_U_1	Promoter activity, unstimulated condition, biorep1
P_U_2	Promoter activity, unstimulated condition, biorep2
P_U_3	Promoter activity, unstimulated condition, biorep3
tileSeq	Tile sequence
P_U_SE	Standard error, promoter activity, unstimulated condition
P_K_SE	Standard error, promoter activity, stimulated condition
E_U_SE	Standard error, enhancer activity, unstimulated condition
E_K_SE	Standard error, enhancer activity, stimulated condition
maxP	Maximum promoter activity
maxE	Maximum Enhancer activity
CpG_motif	CpG content of single motif
CpG	CpG content of tile sequence
bkg	Spacer sequence
CpG_bkg	CpG content of spacer sequence
maxE_SE	Standard error, maximum enhancer activity
maxP_SE	Standard error, maximum promoter activity
CpGnum	Number of CpGs in tile sequence
GC_motif	GC content of single motif
maxE_p	p-value of maximum enhancer activity (one-tailed t-test, mu=1)
maxP_p	p-value of maximum promoter activity (one-tailed t-test, mu=1)

## Sheet: TN04 Spaced Set
label	KCl1_E	KCl2_E	KCl3_E	DNA_E	KCl1_P	KCl2_P	KCl3_P	DNA_P	Un1_E	Un2_E	Un3_E	Un1_P	Un2_P	Un3_P	E_U_1	E_U_2	E_U_3	E_K_1	E_K_2	E_K_3	P_K_1	P_K_2	P_K_3	P_U_1	P_U_2	P_U_3	tileSeq	P_U_SE	P_K_SE	E_U_SE	E_K_SE	maxP	maxE	seq	CpG_motif	CpG	bkg	CpG_bkg	maxE_SE	maxP_SE
>1_top25_spaced_set.top25_spaced_RFX_from_HT_SELEX_spacing1.CGTTGCTAGGCAACG_on_bkg_ttattttaaga	12963.6	13314.8	15618.1	1345.72	6694.02	6842.75	7138.27	2356.59	15531.4	17614.8	16065.3	14216.3	16305.7	15972.8	11.5413	13.0895	11.9381	9.6332	9.89419	11.6058	2.84055	2.90366	3.02906	6.03255	6.91918	6.7779	CGTTGCTAGGCAACGttattttaagaCGTTGCTAGGCAACGttattttaagaCGTTGCTAGGCAACGttattttaagaCGTTGCTAG	0.275036	0.0554005	0.464277	0.618624	6.57654	12.1896	CGTTGCTAGGCAACG	0.133333	0.0804598	ttattttaaga	0	0.464277	0.275036
>1_top25_spaced_set.top25_spaced_RFX_from_HT_SELEX_spacing1.CGTTGCTAGGCAACG_on_bkg_cgctcgagcgc	948.216	1112.09	1546.22	116.814	1488.03	1440.47	1482.7	1008.33	1059.44	72.3659	1631.74	2958.01	3284.03	3349.26	9.06943	NA	13.9686	8.1173	9.52018	13.2366	1.47573	1.42856	1.47045	2.93356	3.25689	3.32157	CGTTGCTAGGCAACGcgctcgagcgcCGTTGCTAGGCAACGcgctcgagcgcCGTTGCTAGGCAACGcgctcgagcgcCGTTGCTAG	0.120019	0.0149189	2.0001	1.52729	3.17067	11.519	CGTTGCTAGGCAACG	0.133333	0.183908	cgctcgagcgc	0.272727	2.0001	0.120019
>1_top25_spaced_set.top25_spaced_RFX_from_HT_SELEX_spacing1.CGTTGCTAGGCAACG_on_bkg_cccgcgctgcc	24323.5	66175.8	109206	496.165	25662.4	27289.7	26935.5	15558.1	97342.9	382.092	123897	59560	62773.5	62659.1	196.19	NA	249.71	49.0231	133.374	220.1	1.64945	1.75405	1.73128	3.82823	4.03478	4.02743	CGTTGCTAGGCAACGcccgcgctgccCGTTGCTAGGCAACGcccgcgctgccCGTTGCTAGGCAACGcccgcgctgccCGTTGCTAG	0.0676579	0.031759	21.8492	49.3871	3.96348	222.95	CGTTGCTAGGCAACG	0.133333	0.149425	cccgcgctgcc	0.181818	21.8492	0.0676579
>1_top25_spaced_set.top25_spaced_PWM_RFX_long.TGTTGCCATGGCAACA_on_bkg_ttattttaaga	6498.72	6696.51	7182.69	1467.26	6680.62	7547.74	6900.63	4136.3	10408.9	10059.8	9511.24	17040.6	18079.2	18689.8	7.09415	6.85621	6.48233	4.42916	4.56396	4.89532	1.61512	1.82476	1.66831	4.11976	4.37087	4.51848	TGTTGCCATGGCAACAttattttaagaTGTTGCCATGGCAACAttattttaagaTGTTGCCATGGCAACAttattttaagaTGTTGC	0.116386	0.0629165	0.178065	0.138497	4.33637	6.8109	TGTTGCCATGGCAACA	0	0	ttattttaaga	0	0.178065	0.116386
>1_top25_spaced_set.top25_spaced_PWM_RFX_long.TGTTGCCATGGCAACA_on_bkg_cgctcgagcgc	1300.44	1914.01	2237.71	1373.45	2778.43	2974.4	3073.68	2915.51	2097.89	1901.78	1928.72	4545.59	4595.92	4704.21	1.52746	1.38467	1.40429	0.946843	1.39358	1.62926	0.952982	1.0202	1.05425	1.55911	1.57637	1.61351	TGTTGCCATGGCAACAcgctcgagcgcTGTTGCCATGGCAACAcgctcgagcgcTGTTGCCATGGCAACAcgctcgagcgcTGTTGC	0.0160515	0.0297515	0.0446873	0.200113	1.583	1.43881	TGTTGCCATGGCAACA	0	0.103448	cgctcgagcgc	0.272727	0.0446873	0.0160515
>1_top25_spaced_set.top25_spaced_PWM_RFX_long.TGTTGCCATGGCAACA_on_bkg_cccgcgctgcc	12955.4	16207.3	18629.9	5489.68	13155.3	13655	14244.4	8700.77	15571.9	7542.45	16380.1	24908	26792.7	26226.9	2.83658	1.37393	2.98381	2.35997	2.95232	3.39362	1.51196	1.5694	1.63715	2.86273	3.07935	3.01432	TGTTGCCATGGCAACAcccgcgctgccTGTTGCCATGGCAACAcccgcgctgccTGTTGCCATGGCAACAcccgcgctgccTGTTGC	0.0641742	0.0361776	0.513848	0.29945	2.98547	2.90197	TGTTGCCATGGCAACA	0	0.0689655	cccgcgctgcc	0.181818	0.29945	0.0641742
>1_top25_spaced_set.top25_spaced_ELK1.ACCGGAAGT_on_bkg_ttattttaaga	104.969	118.522	89.8753	73.1563	241.166	390.085	289.935	318.68	166.894	162.1	172.253	245.902	331.064	348.648	2.28134	2.2158	2.35459	1.43485	1.62012	1.22854	0.756765	1.22407	0.909801	0.771627	1.03886	1.09404	ACCGGAAGTttattttaagaACCGGAAGTttattttaagaACCGGAAGTttattttaagaACCGGAAGTttattttaagaACCGGAA	0.0995573	0.137549	0.0400855	0.113095	0.968177	2.28391	ACCGGAAGT	0.111111	0.0574713	ttattttaaga	0	0.0400855	0.0995573
>1_top25_spaced_set.top25_spaced_ELK1.ACCGGAAGT_on_bkg_cgctcgagcgc	277.583	354.306	282.465	110.914	885.111	956.928	828.516	942.965	642.69	33.7707	490.454	1829.16	2052.6	1945.52	5.79446	NA	4.42191	2.50268	3.19441	2.54669	0.938648	1.01481	0.878629	1.9398	2.17675	2.06319	ACCGGAAGTcgctcgagcgcACCGGAAGTcgctcgagcgcACCGGAAGTcgctcgagcgcACCGGAAGTcgctcgagcgcACCGGAA	0.0684214	0.0394034	0.560342	0.223601	2.05991	5.10819	ACCGGAAGT	0.111111	0.195402	cgctcgagcgc	0.272727	0.560342	0.0684214
>1_top25_spaced_set.top25_spaced_ELK1.ACCGGAAGT_on_bkg_cccgcgctgcc	3400.98	7914.51	11073	270.796	7310.33	7584.32	7317.19	7274.06	13450.1	105.172	17578.3	14181.8	14141.7	13582	49.6688	NA	64.9132	12.5592	29.2268	40.8905	1.00499	1.04265	1.00593	1.94963	1.94413	1.86719	ACCGGAAGTcccgcgctgccACCGGAAGTcccgcgctgccACCGGAAGTcccgcgctgccACCGGAAGTcccgcgctgccACCGGAA	0.0266126	0.0124012	6.22353	8.22096	1.92032	57.291	ACCGGAAGT	0.111111	0.149425	cccgcgctgcc	0.181818	6.22353	0.0266126
>1_top25_spaced_set.top25_spaced_NFYlong_from_Clusters_5and92.TGACCAATCAGCA_on_bkg_ttattttaaga	829.251	891.439	755.686	576.991	891.81	887.85	866.135	928.256	752.977	776.727	661.01	926.086	1003.71	939.215	1.30501	1.34617	1.14562	1.4372	1.54498	1.3097	0.960737	0.956471	0.933077	0.997662	1.08129	1.01181	TGACCAATCAGCAttattttaagaTGACCAATCAGCAttattttaagaTGACCAATCAGCAttattttaagaTGACCAATCAGCAtt	0.0258428	0.00859777	0.0611561	0.0679981	1.03025	1.43063	TGACCAATCAGCA	0	0	ttattttaaga	0	0.0679981	0.0258428
>1_top25_spaced_set.top25_spaced_NFYlong_from_Clusters_5and92.TGACCAATCAGCA_on_bkg_cgctcgagcgc	2958.95	3070.23	2892.52	3682.6	3302.63	3563.59	3539.77	3660.73	2345.31	2106.33	1938.06	5000	5298.27	5619.03	0.636862	0.571969	0.526275	0.803495	0.833714	0.785456	0.902178	0.973465	0.966959	1.36585	1.44733	1.53495	TGACCAATCAGCAcgctcgagcgcTGACCAATCAGCAcgctcgagcgcTGACCAATCAGCAcgctcgagcgcTGACCAATCAGCAcg	0.0488256	0.0227556	0.0320838	0.014078	1.44937	0.807555	TGACCAATCAGCA	0	0.114943	cgctcgagcgc	0.272727	0.014078	0.0488256
>1_top25_spaced_set.top25_spaced_NFYlong_from_Clusters_5and92.TGACCAATCAGCA_on_bkg_cccgcgctgcc	7101.7	7175.64	8292.37	8861.95	9246.36	9687.12	9694.47	8033.99	6669.92	4606.33	6448.88	12214.6	13010.5	13212	0.752647	0.519788	0.727704	0.801371	0.809714	0.935728	1.1509	1.20577	1.20668	1.52036	1.61943	1.64452	TGACCAATCAGCAcccgcgctgccTGACCAATCAGCAcccgcgctgccTGACCAATCAGCAcccgcgctgccTGACCAATCAGCAcc	0.0379035	0.0184417	0.0738148	0.043462	1.59477	0.848937	TGACCAATCAGCA	0	0.0689655	cccgcgctgcc	0.181818	0.043462	0.0379035
>1_top25_spaced_set.top25_spaced_PWM_atoh1_long.CAGaACAGATGGcaTC_on_bkg_ttattttaaga	542.337	510.654	449.376	211.799	503.266	507.924	500.046	434.712	867.656	669.626	589.733	513.374	674.505	681.033	4.09659	3.1616	2.78439	2.56062	2.41103	2.12171	1.1577	1.16842	1.15029	1.18095	1.55161	1.56663	CAGaACAGATGGcaTCttattttaagaCAGaACAGATGGcaTCttattttaagaCAGaACAGATGGcaTCttattttaagaCAGaAC	0.126131	0.00526027	0.39004	0.128825	1.43307	3.34753	CAGAACAGATGGCATC	0	0	ttattttaaga	0	0.39004	0.126131
>1_top25_spaced_set.top25_spaced_PWM_atoh1_long.CAGaACAGATGGcaTC_on_bkg_cgctcgagcgc	215.769	290.001	368.672	415.929	339.139	306.786	416.552	384.05	217.158	247.974	233.347	381.076	418.936	408.62	0.522103	0.596192	0.561027	0.518763	0.697237	0.886382	0.883061	0.798818	1.08463	0.992256	1.09084	1.06398	CAGaACAGATGGcaTCcgctcgagcgcCAGaACAGATGGcaTCcgctcgagcgcCAGaACAGATGGcaTCcgctcgagcgcCAGaAC	0.0294236	0.0847925	0.0213969	0.106137	1.04902	0.700794	CAGAACAGATGGCATC	0	0.103448	cgctcgagcgc	0.272727	0.106137	0.0294236
>1_top25_spaced_set.top25_spaced_PWM_atoh1_long.CAGaACAGATGGcaTC_on_bkg_cccgcgctgcc	4307.21	4948.93	4823.92	6182.89	6950.26	7523.36	7249.29	6376.86	4985.85	5306.83	4079.76	8921.48	8566.21	8174.43	0.806394	0.858309	0.659847	0.696633	0.800424	0.780204	1.08992	1.17979	1.13681	1.39904	1.34333	1.28189	CAGaACAGATGGcaTCcccgcgctgccCAGaACAGATGGcaTCcccgcgctgccCAGaACAGATGGcaTCcccgcgctgccCAGaAC	0.0338322	0.0259522	0.0594224	0.0317678	1.34142	0.77485	CAGAACAGATGGCATC	0	0.0689655	cccgcgctgcc	0.181818	0.0594224	0.0338322
>1_top25_spaced_set.top25_spaced_AP1_short.TGACTCA_on_bkg_ttattttaaga	1240.96	1052.83	630.961	576.401	1850.61	2110.93	2059.82	1889.2	860.824	661.907	683.072	2067.87	2024.75	1934.34	1.49345	1.14834	1.18506	2.15295	1.82656	1.09466	0.979575	1.11737	1.09032	1.09458	1.07175	1.02389	TGACTCAttattttaagaTGACTCAttattttaagaTGACTCAttattttaagaTGACTCAttattttaagaTGACTCAttatttta	0.0208273	0.0421521	0.109429	0.312889	1.06341	1.69139	TGACTCA	0	0	ttattttaaga	0	0.312889	0.0208273
>1_top25_spaced_set.top25_spaced_AP1_short.TGACTCA_on_bkg_cgctcgagcgc	11786.8	14184.8	18345.6	4267.85	8770.73	9829.34	9352.23	7198.89	3048.99	1455.04	2847.69	7430.26	7202.35	7037	0.714411	0.34093	0.667242	2.76177	3.32365	4.29855	1.21834	1.3654	1.29912	1.03214	1.00048	0.977512	TGACTCAcgctcgagcgcTGACTCAcgctcgagcgcTGACTCAcgctcgagcgcTGACTCAcgctcgagcgcTGACTCAcgctcgag	0.0158359	0.0425191	0.117424	0.44894	1.29429	3.46132	TGACTCA	0	0.16092	cgctcgagcgc	0.272727	0.44894	0.0475845
>1_top25_spaced_set.top25_spaced_AP1_short.TGACTCA_on_bkg_cccgcgctgcc	152767	204883	254391	5786.43	81527.4	94750.1	88986.1	65115.2	59399.8	1157.85	53032.7	67180	63567.5	61340.7	10.2654	NA	9.16501	26.4008	35.4076	43.9634	1.25205	1.45511	1.3666	1.03171	0.97623	0.942034	TGACTCAcccgcgctgccTGACTCAcccgcgctgccTGACTCAcccgcgctgccTGACTCAcccgcgctgccTGACTCAcccgcgct	0.0261293	0.0587805	0.449216	5.07043	1.35792	35.2573	TGACTCA	0	0.114943	cccgcgctgcc	0.181818	5.07043	0.06288
>1_top25_spaced_set.top25_spaced_PWM_atoh1_short.CAGATGGT_on_bkg_ttattttaaga	149.289	172.74	168.745	120.354	417.016	479.48	433.985	480.471	128.343	71.401	107.764	660.052	684.406	584.468	1.06638	0.593258	0.895393	1.24041	1.43527	1.40208	0.867931	0.997938	0.903249	1.37376	1.42445	1.21645	CAGATGGTttattttaagaCAGATGGTttattttaagaCAGATGGTttattttaagaCAGATGGTttattttaagaCAGATGGTtta	0.0626187	0.0388122	0.138316	0.0601869	1.33822	1.35925	CAGATGGT	0	0	ttattttaaga	0	0.0601869	0.0626187
>1_top25_spaced_set.top25_spaced_PWM_atoh1_short.CAGATGGT_on_bkg_cgctcgagcgc	1102.17	847.308	1058.33	764.602	4289.9	4685.09	4591.25	4839.03	675.874	105.172	566.822	4712.4	4924.5	4845.5	0.883955	NA	0.74133	1.44149	1.10817	1.38415	0.886522	0.968188	0.948796	0.973831	1.01766	1.00134	CAGATGGTcgctcgagcgcCAGATGGTcgctcgagcgcCAGATGGTcgctcgagcgcCAGATGGTcgctcgagcgcCAGATGGTcgc	0.0127899	0.0246346	0.0582264	0.102892	0.997611	1.31127	CAGATGGT	0	0.149425	cgctcgagcgc	0.272727	0.102892	0.0127899
>1_top25_spaced_set.top25_spaced_PWM_atoh1_short.CAGATGGT_on_bkg_cccgcgctgcc	25740.6	33190	35651.1	3291.45	29813.3	31859	30074.3	30480.5	28413	629.101	26906.2	31826.3	31468.4	30394.4	8.63239	NA	8.1746	7.82046	10.0837	10.8315	0.97811	1.04523	0.986675	1.04415	1.03241	0.997176	CAGATGGTcccgcgctgccCAGATGGTcccgcgctgccCAGATGGTcccgcgctgccCAGATGGTcccgcgctgccCAGATGGTccc	0.0141154	0.0210901	0.186893	0.905157	1.02458	9.57854	CAGATGGT	0	0.091954	cccgcgctgcc	0.181818	0.905157	0.0141154
>1_top25_spaced_set.top25_spaced_CREB_ATF_short.TGACGTCA_on_bkg_ttattttaaga	660.135	687.177	502.568	353.982	1028.3	993.499	1116.62	998.529	466.036	563.489	454.815	1015.24	1030.94	888.392	1.31655	1.59186	1.28485	1.86488	1.94127	1.41975	1.02982	0.994962	1.11826	1.01674	1.03246	0.889701	TGACGTCAttattttaagaTGACGTCAttattttaagaTGACGTCAttattttaagaTGACGTCAttattttaagaTGACGTCAtta	0.0451945	0.0366967	0.0974819	44.4127	1.04768	1.74197	TGACGTCA	0.125	0.0574713	ttattttaaga	0	44.4127	0.0500023
>1_top25_spaced_set.top25_spaced_CREB_ATF_short.TGACGTCA_on_bkg_cgctcgagcgc	2239.33	2318.75	3600.51	459.587	3193.77	3277.12	3007.62	2833.8	1010.64	145.697	977.514	3280.13	3132.43	3016.87	2.19901	NA	2.12694	4.87248	5.04529	7.83424	1.12703	1.15644	1.06134	1.1575	1.10538	1.0646	TGACGTCAcgctcgagcgcTGACGTCAcgctcgagcgcTGACGTCAcgctcgagcgcTGACGTCAcgctcgagcgcTGACGTCAcgc	0.0268838	0.0281123	0.0294243	44.4127	1.11494	5.91733	TGACGTCA	0.125	0.206897	cgctcgagcgc	0.272727	44.4127	0.0366795
>1_top25_spaced_set.top25_spaced_CREB_ATF_short.TGACGTCA_on_bkg_cccgcgctgcc	67084.2	143455	224455	1518.58	51314.7	50095.5	55429.9	39473.8	59369.5	494.983	60114.6	38224	38647.3	39120.8	39.0953	NA	39.5859	44.1755	94.4662	147.806	1.29997	1.26908	1.40422	0.96834	0.979062	0.991057	TGACGTCAcccgcgctgccTGACGTCAcccgcgctgccTGACGTCAcccgcgctgccTGACGTCAcccgcgctgccTGACGTCAccc	0.00656117	0.0408821	0.200293	44.4127	1.32442	95.4824	TGACGTCA	0.125	0.149425	cccgcgctgcc	0.181818	44.4127	0.0440329
>1_top25_spaced_set.top25_spaced_NFI_half.CTGCCAAA_on_bkg_ttattttaaga	478.19	569.916	502.568	408.85	756.155	627.794	717.497	673.313	587.058	468.931	484.514	670.118	667.079	727.79	1.43588	1.14695	1.18507	1.1696	1.39395	1.22922	1.12304	0.932395	1.06562	0.995255	0.990742	1.08091	CTGCCAAAttattttaagaCTGCCAAAttattttaagaCTGCCAAAttattttaagaCTGCCAAAttattttaagaCTGCCAAAtta	0.0293326	0.0564653	0.0906267	0.0670914	1.04035	1.26426	CTGCCAAA	0	0	ttattttaaga	0	0.0670914	0.0798931
>1_top25_spaced_set.top25_spaced_NFI_half.CTGCCAAA_on_bkg_cgctcgagcgc	1687.66	2135.92	1916.73	263.717	2971.86	2913.45	2998.44	2913.87	1752.39	109.996	2013.58	3419.61	3324.88	3187.64	6.64497	NA	7.63537	6.39952	8.0993	7.26813	1.0199	0.999854	1.02902	1.17356	1.14105	1.09395	CTGCCAAAcgctcgagcgcCTGCCAAAcgctcgagcgcCTGCCAAAcgctcgagcgcCTGCCAAAcgctcgagcgcCTGCCAAAcgc	0.0231097	0.00861461	0.40433	0.490725	1.13619	7.25565	CTGCCAAA	0	0.149425	cgctcgagcgc	0.272727	0.490725	0.0231097
>1_top25_spaced_set.top25_spaced_NFI_half.CTGCCAAA_on_bkg_cccgcgctgcc	2051.55	4416.85	8495.96	394.1	17298.6	18693.6	17687.9	15273.7	4771.13	236.395	4481.97	19989.9	18750.6	18618.6	12.1064	NA	11.3727	5.20566	11.2074	21.5579	1.13257	1.22391	1.15806	1.30878	1.22764	1.219	CTGCCAAAcccgcgctgccCTGCCAAAcccgcgctgccCTGCCAAAcccgcgctgccCTGCCAAAcccgcgctgccCTGCCAAAccc	0.0285961	0.0272106	0.299542	4.7758	1.2518	12.657	CTGCCAAA	0	0.091954	cccgcgctgcc	0.181818	4.7758	0.0285961
>1_top25_spaced_set.top25_spaced_CREB_ATF_long.CATGACGTCATC_on_bkg_ttattttaaga	10709.1	12654.1	11206.9	2617.11	3815.94	4146.69	4080.19	3275.04	7607.85	6875.72	7136.19	3803.57	3699.26	3634.89	2.90697	2.62722	2.72675	4.09197	4.83516	4.28217	1.16516	1.26615	1.24584	1.16138	1.12953	1.10987	CATGACGTCATCttattttaagaCATGACGTCATCttattttaagaCATGACGTCATCttattttaagaCATGACGTCATCttattt	0.0150065	0.0308412	0.0818677	0.2229	1.22572	4.4031	CATGACGTCATC	0.0833333	0.045977	ttattttaaga	0	0.2229	0.0367088
>1_top25_spaced_set.top25_spaced_CREB_ATF_long.CATGACGTCATC_on_bkg_cgctcgagcgc	15112	18142.7	22276.2	10085.5	7657.85	7641.2	7664.01	6961.92	11418.1	9879.39	12533.7	7664.65	7478.34	7513.72	1.13213	0.979559	1.24274	1.49838	1.79888	2.20873	1.09996	1.09757	1.10085	1.10094	1.07418	1.07926	CATGACGTCATCcgctcgagcgcCATGACGTCATCcgctcgagcgcCATGACGTCATCcgctcgagcgcCATGACGTCATCcgctcg	0.00820572	0.000978271	0.0762953	0.205868	1.09946	1.83533	CATGACGTCATC	0.0833333	0.172414	cgctcgagcgc	0.272727	0.205868	0.00128408
>1_top25_spaced_set.top25_spaced_CREB_ATF_long.CATGACGTCATC_on_bkg_cccgcgctgcc	154673	200818	245701	59387.6	48033.8	50018.3	49877.1	39712.4	123594	42539.6	135063	45126.5	43623.1	43716.2	2.08113	NA	2.27427	2.60447	3.38148	4.13724	1.20954	1.25951	1.25596	1.13633	1.09848	1.10082	CATGACGTCATCcccgcgctgccCATGACGTCATCcccgcgctgccCATGACGTCATCcccgcgctgccCATGACGTCATCcccgcg	0.0122472	0.0160969	0.0788456	0.442485	1.24167	3.3744	CATGACGTCATC	0.0833333	0.137931	cccgcgctgcc	0.181818	0.442485	0.0188252
>1_top25_spaced_set.top25_spaced_PWM_PF0149.1_CREB_middle.TGACGTCACAG_on_bkg_ttattttaaga	601.819	524.524	376.009	352.212	531.737	558.716	567.942	627.554	615.362	486.299	431.056	629.853	626.856	606.831	1.74713	1.3807	1.22385	1.70868	1.48923	1.06756	0.847317	0.890308	0.90501	1.00366	0.998889	0.966978	TGACGTCACAGttattttaagaTGACGTCACAGttattttaagaTGACGTCACAGttattttaagaTGACGTCACAGttattttaag	0.0115157	0.017309	0.155044	0.188119	0.989844	1.45056	TGACGTCACAG	0.0909091	0.045977	ttattttaaga	0	0.155044	0.0115157
>1_top25_spaced_set.top25_spaced_PWM_PF0149.1_CREB_middle.TGACGTCACAG_on_bkg_cgctcgagcgc	465.36	467.785	706.163	117.994	955.451	1009.75	1006.51	831.835	371.364	62.7171	319.05	878.631	877.475	851.799	3.14731	NA	2.70395	3.94393	3.96447	5.98473	1.14861	1.21388	1.20999	1.05626	1.05487	1.024	TGACGTCACAGcgctcgagcgcTGACGTCACAGcgctcgagcgcTGACGTCACAGcgctcgagcgcTGACGTCACAGcgctcgagcg	0.0105281	0.0211406	0.181004	0.676869	1.19083	4.63104	TGACGTCACAG	0.0909091	0.183908	cgctcgagcgc	0.272727	0.676869	0.0258447
>1_top25_spaced_set.top25_spaced_PWM_PF0149.1_CREB_middle.TGACGTCACAG_on_bkg_cccgcgctgcc	5155.12	14227.7	24757.9	275.516	10805.6	10959	11483.6	9285.83	11092.6	116.75	11325.4	10854.2	10984.5	10505.2	40.2612	NA	41.1062	18.7108	51.6402	89.86	1.16366	1.18018	1.23668	1.1689	1.18293	1.13131	TGACGTCACAGcccgcgctgccTGACGTCACAGcccgcgctgccTGACGTCACAGcccgcgctgccTGACGTCACAGcccgcgctgc	0.0154099	0.0221076	0.344942	20.5579	1.19351	53.4037	TGACGTCACAG	0.0909091	0.137931	cccgcgctgcc	0.181818	20.5579	0.026536
>1_top25_spaced_set.top25_spaced_motif_74_alittle_SRFlike.TGCCAAAA_on_bkg_ttattttaaga	124.796	128.609	166.911	146.313	531.737	700.935	618.405	547.475	140.055	170.783	128.129	576.647	522.277	544.826	0.957228	1.16725	0.87572	0.85294	0.879003	1.14078	0.971253	1.2803	1.12956	1.05328	0.953974	0.995162	TGCCAAAAttattttaagaTGCCAAAAttattttaagaTGCCAAAAttattttaagaTGCCAAAAttattttaagaTGCCAAAAtta	0.0288067	0.0892243	0.0868403	0.0919128	1.12704	1.00007	TGCCAAAA	0	0	ttattttaaga	0	0.0868403	0.115223
>1_top25_spaced_set.top25_spaced_motif_74_alittle_SRFlike.TGCCAAAA_on_bkg_cgctcgagcgc	1174.48	1494.14	1001.47	1324.48	1740.08	2043.88	1898.34	1854.88	1213.64	832.69	964.786	1844.98	2019.8	1766.62	0.916315	0.62869	0.728424	0.886746	1.12809	0.756119	0.938108	1.1019	1.02343	0.994664	1.08891	0.952418	TGCCAAAAcgctcgagcgcTGCCAAAAcgctcgagcgcTGCCAAAAcgctcgagcgcTGCCAAAAcgctcgagcgcTGCCAAAAcgc	0.0403448	0.0472954	0.0843201	0.108953	1.02115	0.923652	TGCCAAAA	0	0.149425	cgctcgagcgc	0.272727	0.108953	0.0670944
>1_top25_spaced_set.top25_spaced_motif_74_alittle_SRFlike.TGCCAAAA_on_bkg_cccgcgctgcc	4732.91	5310.81	4299.34	1828.32	15553.5	16168.2	16124.4	15097.2	4030.84	912.775	4036.49	18242.7	17888	17798.3	2.20467	NA	2.20776	2.58867	2.90475	2.35153	1.03022	1.07094	1.06804	1.20835	1.18485	1.17891	TGCCAAAAcccgcgctgccTGCCAAAAcccgcgctgccTGCCAAAAcccgcgctgccTGCCAAAAcccgcgctgccTGCCAAAAccc	0.00898727	0.0131155	0.00126065	0.160242	1.1907	2.61498	TGCCAAAA	0	0.091954	cccgcgctgcc	0.181818	0.160242	0.00898727
>1_top25_spaced_set.top25_spaced_NFI_full.TTTGGCAGACTGCCAAA_on_bkg_ttattttaaga	316.072	257.219	165.077	216.519	1169.82	1078.83	1112.03	1165.22	269.861	239.29	218.074	1183.49	1182.55	1211.63	1.24636	1.10517	1.00718	1.45979	1.18797	0.762413	1.00395	0.925857	0.954348	1.01568	1.01487	1.03983	TTTGGCAGACTGCCAAAttattttaagaTTTGGCAGACTGCCAAAttattttaagaTTTGGCAGACTGCCAAAttattttaagaTTT	0.00818713	0.0228152	0.0694206	0.202939	1.02346	1.13672	TTTGGCAGACTGCCAAA	0	0	ttattttaaga	0	0.202939	0.00818713
>1_top25_spaced_set.top25_spaced_NFI_full.TTTGGCAGACTGCCAAA_on_bkg_cgctcgagcgc	573.828	650.612	667.645	1682.01	4266.45	3927.27	3979.26	3624.78	565.587	479.545	499.788	3917.17	3662.75	4251.88	0.336257	0.285103	0.297138	0.341157	0.386807	0.396934	1.17703	1.08345	1.0978	1.08067	1.01048	1.17301	TTTGGCAGACTGCCAAAcgctcgagcgcTTTGGCAGACTGCCAAAcgctcgagcgcTTTGGCAGACTGCCAAAcgctcgagcgcTTT	0.0470632	0.029097	0.0154415	0.0171554	1.11942	0.374966	TTTGGCAGACTGCCAAA	0	0.103448	cgctcgagcgc	0.272727	0.0171554	0.0370816
>1_top25_spaced_set.top25_spaced_NFI_full.TTTGGCAGACTGCCAAA_on_bkg_cccgcgctgcc	11989.7	13698.1	14631.3	16336.9	16658.9	18145.1	17562.2	16669.4	12514.6	11041.1	11148.1	19455	19177.6	19264.1	0.766036	0.675839	0.682387	0.733906	0.83848	0.895601	0.999368	1.08853	1.05356	1.16711	1.15047	1.15566	TTTGGCAGACTGCCAAAcccgcgctgccTTTGGCAGACTGCCAAAcccgcgctgccTTTGGCAGACTGCCAAAcccgcgctgccTTT	0.00491594	0.0259363	0.029036	0.0473426	1.15774	0.822663	TTTGGCAGACTGCCAAA	0	0.0689655	cccgcgctgcc	0.181818	0.0473426	0.00491594
>1_top25_spaced_set.top25_spaced_MYBL2.AACCGTTAACGG_on_bkg_ttattttaaga	113.133	165.175	82.5385	94.9853	442.137	345.388	462.428	491.91	135.175	59.8225	62.7917	382.514	351.485	361.862	1.42311	0.629808	0.661068	1.19106	1.73895	0.868961	0.898816	0.702136	0.940065	0.777608	0.714531	0.735626	AACCGTTAACGGttattttaagaAACCGTTAACGGttattttaagaAACCGTTAACGGttattttaagaAACCGTTAACGGttattt	0.0185387	0.073407	0.259382	0.253948	0.847006	1.26632	AACCGTTAACGG	0.166667	0.091954	ttattttaaga	0	0.253948	0.130888
>1_top25_spaced_set.top25_spaced_MYBL2.AACCGTTAACGG_on_bkg_cgctcgagcgc	1060.18	1001.13	1513.21	1473.75	2279.35	2476.64	2315.81	2536.36	1215.11	790.235	920.662	2844.41	2418.94	2365.32	0.824503	0.536209	0.624709	0.719379	0.679313	1.02678	0.898669	0.976452	0.913043	1.12145	0.953703	0.932563	AACCGTTAACGGcgctcgagcgcAACCGTTAACGGcgctcgagcgcAACCGTTAACGGcgctcgagcgcAACCGTTAACGGcgctcg	0.0597518	0.0238949	0.0852655	0.109754	1.00257	0.808489	AACCGTTAACGG	0.166667	0.218391	cgctcgagcgc	0.272727	0.109754	0.0597518
>1_top25_spaced_set.top25_spaced_MYBL2.AACCGTTAACGG_on_bkg_cccgcgctgcc	6128.99	7509.77	8213.5	1372.27	6781.95	7084.52	6997.89	6025.49	6912.45	419.722	6602.46	6670.98	6967.2	6508.44	5.03724	NA	4.81134	4.46631	5.47251	5.98533	1.12554	1.17576	1.16138	1.10713	1.15629	1.08015	AACCGTTAACGGcccgcgctgccAACCGTTAACGGcccgcgctgccAACCGTTAACGGcccgcgctgccAACCGTTAACGGcccgcg	0.0222879	0.0149307	0.0922223	0.446146	1.15423	5.30805	AACCGTTAACGG	0.166667	0.183908	cccgcgctgcc	0.181818	0.446146	0.0187457
>1_top25_spaced_set.top25_spaced_EGR_long.AATGCGTGGGCGGA_on_bkg_ttattttaaga	895.731	919.178	803.375	361.652	1278.68	1446.57	1364.35	1204.45	857.896	720.764	628.765	1266.9	1365.72	1219.76	2.37216	1.99298	1.73859	2.47678	2.54161	2.2214	1.06163	1.20102	1.13276	1.05185	1.1339	1.01272	AATGCGTGGGCGGAttattttaagaAATGCGTGGGCGGAttattttaagaAATGCGTGGGCGGAttattttaagaAATGCGTGGGCG	0.035706	0.0402409	0.184074	0.0977385	1.13181	2.41326	AATGCGTGGGCGGA	0.142857	0.091954	ttattttaaga	0	0.0977385	0.0514001
>1_top25_spaced_set.top25_spaced_EGR_long.AATGCGTGGGCGGA_on_bkg_cgctcgagcgc	3981.81	6643.55	10176.1	147.493	2934.18	2982.53	3013.12	3226.02	3144.15	51.1386	3334.75	3308.89	3149.75	2892.86	21.3174	NA	22.6096	26.9966	45.0433	68.9938	0.909537	0.924523	0.934006	1.02569	0.976359	0.896729	AATGCGTGGGCGGAcgctcgagcgcAATGCGTGGGCGGAcgctcgagcgcAATGCGTGGGCGGAcgctcgagcgcAATGCGTGGGCG	0.0375681	0.00712299	0.527549	12.1634	0.966259	47.0113	AATGCGTGGGCGGA	0.142857	0.195402	cgctcgagcgc	0.272727	12.1634	0.0375681
>1_top25_spaced_set.top25_spaced_EGR_long.AATGCGTGGGCGGA_on_bkg_cccgcgctgcc	717.285	2146.01	8187.82	113.864	10937.9	11586.8	10979.9	11985.6	3006.54	135.083	2440.39	12145.5	11810	11748.3	26.4046	NA	21.4324	6.29947	18.8471	71.9086	0.912583	0.966721	0.91609	1.01334	0.98535	0.980202	AATGCGTGGGCGGAcccgcgctgccAATGCGTGGGCGGAcccgcgctgccAATGCGTGGGCGGAcccgcgctgccAATGCGTGGGCG	0.0102965	0.017491	2.02987	20.1074	0.992964	32.3517	AATGCGTGGGCGGA	0.142857	0.16092	cccgcgctgcc	0.181818	20.1074	0.0102965
>1_top25_spaced_set.top25_spaced_PWM_emxdlx_long.TGCACTGTAATTAAC_on_bkg_ttattttaaga	1285.28	1209.18	647.469	859.587	3411.49	3370.58	3475.55	3074.03	1304.9	984.176	991.939	3143.51	3383.66	3235.41	1.51805	1.14494	1.15397	1.49523	1.4067	0.753232	1.10978	1.09647	1.13062	1.0226	1.10072	1.0525	TGCACTGTAATTAACttattttaagaTGCACTGTAATTAACttattttaagaTGCACTGTAATTAACttattttaagaTGCACTGTA	0.0227578	0.00993682	0.122894	0.233977	1.11229	1.27232	TGCACTGTAATTAAC	0	0	ttattttaaga	0	0.122894	0.0128684
>1_top25_spaced_set.top25_spaced_PWM_emxdlx_long.TGCACTGTAATTAAC_on_bkg_cgctcgagcgc	7782.83	7645.95	7485.33	5125.66	6212.53	6822.43	6573.08	6796.86	8954.71	9319.76	7085.28	6919.76	6636.14	6436.27	1.74704	1.81825	1.38231	1.5184	1.4917	1.46036	0.914029	1.00376	0.967076	1.01808	0.976353	0.946947	TGCACTGTAATTAACcgctcgagcgcTGCACTGTAATTAACcgctcgagcgcTGCACTGTAATTAACcgctcgagcgcTGCACTGTA	0.0206372	0.0260468	0.135018	0.0167731	0.98046	1.6492	TGCACTGTAATTAAC	0	0.103448	cgctcgagcgc	0.272727	0.135018	0.0206372
>1_top25_spaced_set.top25_spaced_PWM_emxdlx_long.TGCACTGTAATTAAC_on_bkg_cccgcgctgcc	17963.6	19455.3	17314.7	13289.7	13114.2	13076	12922.3	12335.3	17694.2	21178.1	14956.3	14109.9	13751.9	13588.1	1.33143	1.59358	1.12541	1.3517	1.46394	1.30287	1.06314	1.06004	1.04758	1.14386	1.11483	1.10156	TGCACTGTAATTAACcccgcgctgccTGCACTGTAATTAACcccgcgctgccTGCACTGTAATTAACcccgcgctgccTGCACTGTA	0.0124888	0.00475487	0.135472	0.0476829	1.12008	1.37284	TGCACTGTAATTAAC	0	0.0689655	cccgcgctgcc	0.181818	0.0476829	0.0124888
>1_top25_spaced_set.top25_spaced_BHLHA15_NeuroD.CATATG_on_bkg_ttattttaaga	165.617	203.001	146.735	135.693	607.938	739.537	789.063	787.71	220.086	142.802	183.284	655.738	511.139	591.584	1.62194	1.05239	1.35072	1.22053	1.49603	1.08137	0.771779	0.938843	1.00172	0.83246	0.648892	0.751017	CATATGttattttaagaCATATGttattttaagaCATATGttattttaagaCATATGttattttaagaCATATGttattttaagaCA	0.0531037	0.0686114	0.164477	0.121838	0.904113	1.34168	CATATG	0	0	ttattttaaga	0	0.164477	0.113088
>1_top25_spaced_set.top25_spaced_BHLHA15_NeuroD.CATATG_on_bkg_cgctcgagcgc	657.803	625.394	656.64	1612.39	2776.75	2923.61	3087.44	3263.61	483.115	322.269	364.022	3267.18	3119.43	3017.89	0.299627	0.199871	0.225766	0.407968	0.387868	0.407246	0.850824	0.895822	0.946021	1.0011	0.955824	0.92471	CATATGcgctcgagcgcCATATGcgctcgagcgcCATATGcgctcgagcgcCATATGcgctcgagcgcCATATGcgctcgagcgcCA	0.0221767	0.0274946	0.0298862	0.00658301	0.960544	0.401027	CATATG	0	0.172414	cgctcgagcgc	0.272727	0.00658301	0.0221767
>1_top25_spaced_set.top25_spaced_BHLHA15_NeuroD.CATATG_on_bkg_cccgcgctgcc	19269.9	22288.5	22311.1	4626.55	21810.4	21942.3	22023.1	19973.9	20832.5	1015.05	18106.1	22358.4	22089.1	21597.9	4.50282	NA	3.91351	4.16507	4.81752	4.8224	1.09195	1.09855	1.1026	1.11938	1.1059	1.08131	CATATGcccgcgctgccCATATGcccgcgctgccCATATGcccgcgctgccCATATGcccgcgctgccCATATGcccgcgctgccCA	0.0111458	0.00310353	0.240583	0.218302	1.1022	4.60166	CATATG	0	0.114943	cccgcgctgcc	0.181818	0.218302	0.0111458
>1_top25_spaced_set.top25_spaced_cluster_45_atoh1_middle.ACCATCTGCT_on_bkg_ttattttaaga	304.409	317.741	121.056	284.956	2379	2525.4	2396.55	2431.77	429.924	267.271	220.619	2599.94	2520.42	2322.63	1.50874	0.93794	0.774223	1.06827	1.11505	0.424826	0.978299	1.0385	0.985517	1.06916	1.03646	0.955118	ACCATCTGCTttattttaagaACCATCTGCTttattttaagaACCATCTGCTttattttaagaACCATCTGCTttattttaagaACC	0.0339035	0.0189791	0.222627	0.222688	1.02024	1.07363	ACCATCTGCT	0	0	ttattttaaga	0	0.222627	0.0339035
>1_top25_spaced_set.top25_spaced_cluster_45_atoh1_middle.ACCATCTGCT_on_bkg_cgctcgagcgc	18791.7	19349.4	20256.8	18191.2	22565.7	22872.8	22348.8	22704.7	14814.6	3686.8	13640.2	21386.3	20921.4	20501.1	0.814383	NA	0.749827	1.03301	1.06367	1.11355	0.99388	1.0074	0.984327	0.941931	0.921458	0.902946	ACCATCTGCTcgctcgagcgcACCATCTGCTcgctcgagcgcACCATCTGCTcgctcgagcgcACCATCTGCTcgctcgagcgcACC	0.0112586	0.00669483	0.0263547	0.0234692	0.995204	1.07008	ACCATCTGCT	0	0.137931	cgctcgagcgc	0.272727	0.0234692	0.00969607
>1_top25_spaced_set.top25_spaced_cluster_45_atoh1_middle.ACCATCTGCT_on_bkg_cccgcgctgcc	52378.1	62370.4	68142	13549.9	50607.9	52299.9	50790.9	50908.6	58283.7	2396.76	63712.3	54217.7	52185	52003.5	4.30143	NA	4.70207	3.86559	4.60303	5.02898	0.994093	1.02733	0.997687	1.065	1.02507	1.02151	ACCATCTGCTcccgcgctgccACCATCTGCTcccgcgctgccACCATCTGCTcccgcgctgccACCATCTGCTcccgcgctgccACC	0.0139419	0.0105305	0.163561	0.339833	1.03719	4.50175	ACCATCTGCT	0	0.091954	cccgcgctgcc	0.181818	0.163561	0.0139419

## Sheet: TN04 Packed Set
label	KCl1_E	KCl2_E	KCl3_E	DNA_E	KCl1_P	KCl2_P	KCl3_P	DNA_P	Un1_E	Un2_E	Un3_E	Un1_P	Un2_P	Un3_P	E_U_1	E_U_2	E_U_3	E_K_1	E_K_2	E_K_3	P_K_1	P_K_2	P_K_3	P_U_1	P_U_2	P_U_3	tileSeq	P_U_SE	P_K_SE	E_U_SE	E_K_SE	maxP	maxE	CpG	CpGnum	names	CpG_motif	GC_motif	maxE_SE	maxP_SE	maxE_p	maxP_p
>1_top25_packed_set.top25_packed_AP1_alt1.TGACGCAC	71833.4	71975.8	133683	7126.84	40283.9	48321.8	52959	3389.44	8264.69	8865.3	9031.82	35002.9	36566.2	38898.2	1.15966	1.24393	1.2673	10.0793	10.0993	18.7577	11.8851	14.2566	15.6247	10.327	10.7883	11.4763	TGACGCACTGACGCACTGACGCACTGACGCACTGACGCACTGACGCACTGACGCACTGACGCACTGACGCACTGACGCACTGACGCA	0.333902	1.0924	0.0326892	2.88948	13.9221	12.9787	0.126437	11	AP1_alt1	0.125	0.625	2.88948	1.0924	0.0535544	0.00707084
>1_top25_packed_set.top25_packed_foxk1.GACGCAAC	1611.85	2776.45	3738.08	542.773	672.417	1048.35	772.548	325.217	1452.27	822.076	1453.54	3360.66	3530.32	3438.71	2.67566	1.51459	2.67799	2.96966	5.1153	6.887	2.0676	3.22356	2.37549	10.3336	10.8553	10.5736	GACGCAACGACGCAACGACGCAACGACGCAACGACGCAACGACGCAACGACGCAACGACGCAACGACGCAACGACGCAACGACGCAA	0.150763	0.345629	0.387414	1.13256	10.5875	4.99065	0.241379	21	foxk1	0.125	0.625	1.13256	0.150763	0.0719581	0.000247182
>1_top25_packed_set.top25_packed_EGR_long.AATGCGTGGGCGGA	3009.1	3666.62	4737.71	1273.16	2335.45	3045.51	2580.05	1534.56	1570.86	1962.56	1885.45	8937.3	10309.4	10702.4	1.23383	1.54149	1.48092	2.36349	2.87995	3.72123	1.5219	1.98461	1.68129	5.824	6.71813	6.97421	AATGCGTGGGCGGAAATGCGTGGGCGGAAATGCGTGGGCGGAAATGCGTGGGCGGAAATGCGTGGGCGGAAATGCGTGGGCGGAAAT	0.348651	0.135709	0.0940988	0.395667	6.50545	2.98823	0.137931	12	EGR_long	0.142857	0.642857	0.395667	0.348651	0.0373956	0.00398652
>1_top25_packed_set.top25_packed_RFX_short.GGTTGCTA	53914.2	69740.3	72810	19254.9	22004.7	23683.5	23221.4	14522	107504	115308	121143	74341.4	76959.2	78274	5.58321	5.9885	6.29155	2.80003	3.62195	3.78138	1.51527	1.63087	1.59905	5.11923	5.29949	5.39004	GGTTGCTAGGTTGCTAGGTTGCTAGGTTGCTAGGTTGCTAGGTTGCTAGGTTGCTAGGTTGCTAGGTTGCTAGGTTGCTAGGTTGCT	0.0795925	0.034477	0.20519	0.30405	5.26959	5.95442	0	0	RFX_short	0	0.5	0.20519	0.0795925	0.00171085	0.000347333
>1_top25_packed_set.top25_packed_RFX_from_HT_SELEX_spacing1.CGTTGCTAGGCAACG	626.312	636.742	902.421	717.994	1461.23	1389.68	1525.83	1014.87	524.107	671.555	605.855	2668.97	2926.36	2905.06	0.72996	0.935322	0.843816	0.872308	0.886834	1.25686	1.43982	1.36931	1.50347	2.62986	2.88348	2.86249	CGTTGCTAGGCAACGCGTTGCTAGGCAACGCGTTGCTAGGCAACGCGTTGCTAGGCAACGCGTTGCTAGGCAACGCGTTGCTAGGCA	0.081269	0.0387437	0.0593997	0.125834	2.79194	1.00534	0.126437	11	RFX_from_HT_SELEX_spacing1	0.133333	0.6	0.125834	0.081269	0.970031	0.00205052
>1_top25_packed_set.top25_packed_CREB_ATF_short.TGACGTCA	0	2.52175	22.0103	57.2271	201.809	180.821	210.111	158.523	7.80793	8.68391	2.54561	452.977	345.297	368.977	0.136437	0.151745	0.0444825	0	0.0440656	0.384612	1.27306	1.14066	1.32543	2.85749	2.17822	2.3276	TGACGTCATGACGTCATGACGTCATGACGTCATGACGTCATGACGTCATGACGTCATGACGTCATGACGTCATGACGTCATGACGTC	0.206088	0.0549807	0.0334956	0.170273	2.45444	0.142893	0.126437	11	CREB_ATF_short	0.125	0.5	0.170273	0.206088	1.98048	0.0194927
>1_top25_packed_set.top25_packed_ELK1.ACCGGAAGT	20.9937	52.9568	93.5437	77.2861	154.915	229.581	198.183	189.573	161.038	113.856	115.401	345.125	376.856	299.858	2.08367	1.47317	1.49316	0.271636	0.685204	1.21035	0.817179	1.21104	1.04542	1.82053	1.98792	1.58175	ACCGGAAGTACCGGAAGTACCGGAAGTACCGGAAGTACCGGAAGTACCGGAAGTACCGGAAGTACCGGAAGTACCGGAAGTACCGGA	0.117853	0.114176	0.200249	0.271622	1.79673	1.68333	0.114943	10	ELK1	0.111111	0.555556	0.200249	0.117853	0.0761917	0.0211875
>1_top25_packed_set.top25_packed_CREB_ATF_long.CATGACGTCATC	49402.8	54653.9	86738.8	16156.3	16365.8	17604.6	19202.7	10063.7	14848.7	15103.2	17693.7	11068.4	11312.5	11132.3	0.919065	0.934818	1.09515	3.0578	3.38281	5.36872	1.62621	1.74931	1.90811	1.09984	1.12409	1.10618	CATGACGTCATCCATGACGTCATCCATGACGTCATCCATGACGTCATCCATGACGTCATCCATGACGTCATCCATGACGTCATCCAT	0.00726046	0.081593	0.0562549	0.722257	1.76121	3.93644	0.0804598	7	CREB_ATF_long	0.0833333	0.5	0.722257	0.081593	0.0555086	0.0112951
>1_top25_packed_set.top25_packed_NFI_half.CTGCCAAA	148.122	155.088	102.715	202.36	311.506	314.913	300.945	184.671	134.687	182.362	88.2478	264.596	264.851	242.936	0.66558	0.901177	0.436093	0.731974	0.766395	0.507584	1.68682	1.70527	1.62963	1.4328	1.43418	1.31551	CTGCCAAACTGCCAAACTGCCAAACTGCCAAACTGCCAAACTGCCAAACTGCCAAACTGCCAAACTGCCAAACTGCCAAACTGCCAA	0.03933	0.0227685	0.134262	0.0811443	1.6739	0.668651	0	0	NFI_half	0	0.5	0.0811443	0.0227685	1.94494	0.00113954
>1_top25_packed_set.top25_packed_E2F1_half.GCGCCAAA	199.44	150.044	194.424	77.8761	235.304	225.518	303.698	165.06	230.334	27.0166	156.979	217.141	240.718	217.524	2.9577	NA	2.01576	2.56099	1.9267	2.49658	1.42557	1.36628	1.83993	1.31553	1.45837	1.31785	GCGCCAAAGCGCCAAAGCGCCAAAGCGCCAAAGCGCCAAAGCGCCAAAGCGCCAAAGCGCCAAAGCGCCAAAGCGCCAAAGCGCCAA	0.0472306	0.148986	0.384545	0.201554	1.54393	2.48673	0.126437	11	E2F1_half	0.125	0.625	0.384545	0.148986	0.195304	0.0675166
>1_top25_packed_set.top25_packed_motif_74_alittle_SRFlike.TGCCAAAA	22.16	10.087	20.1761	33.6283	123.095	77.2044	81.6589	76.8099	15.1279	6.75415	11.8795	94.9094	119.431	139.256	0.449855	0.200847	0.353259	0.658969	0.299956	0.599973	1.60259	1.00514	1.06313	1.23564	1.55489	1.81299	TGCCAAAATGCCAAAATGCCAAAATGCCAAAATGCCAAAATGCCAAAATGCCAAAATGCCAAAATGCCAAAATGCCAAAATGCCAAA	0.166979	0.190225	0.0724818	0.111151	1.53451	0.519632	0	0	motif_74_alittle_SRFlike	0	0.375	0.111151	0.166979	1.95041	0.0852923
>1_top25_packed_set.top25_packed_AP1_NEF2.ATGAGTCAT	1618.85	2135.92	2340.43	827.139	1858.99	1649.74	1867.14	1199.54	1215.11	778.657	795.927	1604.83	1334.78	1274.65	1.46905	0.941386	0.962266	1.95717	2.5823	2.82954	1.54975	1.3753	1.55655	1.33787	1.11274	1.06261	ATGAGTCATATGAGTCATATGAGTCATATGAGTCATATGAGTCATATGAGTCATATGAGTCATATGAGTCATATGAGTCATATGAGT	0.0846441	0.059313	0.172513	0.25959	1.49387	2.45634	0	0	AP1_NEF2	0	0.333333	0.25959	0.059313	0.0303343	0.0141192
>1_top25_packed_set.top25_packed_AP1_long.GTGACTCACCA	4320.04	6088.77	6522.38	2146.31	2631.89	3086.14	3048.9	2284.69	3082.67	3420.49	2811.2	2740.87	2486.39	2569.63	1.43626	1.59366	1.30978	2.01277	2.83685	3.03888	1.15197	1.3508	1.3345	1.19967	1.08828	1.12472	GTGACTCACCAGTGACTCACCAGTGACTCACCAGTGACTCACCAGTGACTCACCAGTGACTCACCAGTGACTCACCAGTGACTCACC	0.0327889	0.0637328	0.0821107	0.31383	1.27909	2.6295	0	0	AP1_long	0	0.545455	0.31383	0.0637328	0.0351482	0.048395
>1_top25_packed_set.top25_packed_NFYlong_from_Clusters_5and92.TGACCAATCAGCA	1056.68	1284.83	1434.34	538.643	538.436	516.05	492.706	421.638	1153.62	1387.5	1191.34	406.96	408.416	406.587	2.14172	2.57591	2.21175	1.96175	2.38531	2.66287	1.27701	1.22392	1.16855	0.965189	0.968642	0.964304	TGACCAATCAGCATGACCAATCAGCATGACCAATCAGCATGACCAATCAGCATGACCAATCAGCATGACCAATCAGCATGACCAATC	0.00132341	0.0313115	0.134585	0.203853	1.22316	2.33664	0	0	NFYlong_from_Clusters_5and92	0	0.461538	0.203853	0.0313115	0.0224784	0.0191236
>1_top25_packed_set.top25_packed_AP1_short.TGACTCA	11835.8	14319.8	18015.4	3842.48	5557.7	5434.78	5623.45	4539.96	3591.16	3212.08	2971.57	4319.82	4128.71	4200.04	0.934594	0.83594	0.773348	3.08025	3.7267	4.68849	1.22417	1.1971	1.23866	0.95151	0.909417	0.925128	TGACTCATGACTCATGACTCATGACTCATGACTCATGACTCATGACTCATGACTCATGACTCATGACTCATGACTCATGACTCATGA	0.0122808	0.0121787	0.0469341	0.467224	1.21998	3.83181	0	0	AP1_short	0	0.428571	0.467224	0.0121787	0.0261587	0.00305111
>1_top25_packed_set.top25_packed_EGR1_HTSELEX.TGAGTGGGCGG	1870.77	2249.4	2417.46	675.516	4594.71	5158.47	4661.9	4363.46	1988.58	240.255	1832.84	5389.7	5331.68	5045.74	2.94379	NA	2.71324	2.7694	3.3299	3.57869	1.053	1.1822	1.06839	1.23519	1.22189	1.15636	TGAGTGGGCGGTGAGTGGGCGGTGAGTGGGCGGTGAGTGGGCGGTGAGTGGGCGGTGAGTGGGCGGTGAGTGGGCGGTGAGTGGGCG	0.0243641	0.040744	0.094123	0.239329	1.20448	3.22599	0.091954	8	EGR1_HTSELEX	0.0909091	0.727273	0.239329	0.0243641	0.011363	0.0139014
>1_top25_packed_set.top25_packed_CAMTA.CACGCGTT	16502.2	19702.4	21832.4	33955.8	32130.3	34102	33371	30895.6	20725.2	15915.7	19596.9	37750.9	36436.9	35663.8	0.610358	0.468718	0.577132	0.485992	0.580238	0.642965	1.03996	1.10378	1.08012	1.22189	1.17936	1.15433	CACGCGTTCACGCGTTCACGCGTTCACGCGTTCACGCGTTCACGCGTTCACGCGTTCACGCGTTCACGCGTTCACGCGTTCACGCGT	0.0197188	0.0186267	0.0427651	0.0456177	1.18519	0.569732	0.252874	22	CAMTA	0.25	0.625	0.0456177	0.0197188	1.98895	0.0111483
>1_top25_packed_set.top25_packed_cluster_67_NEF2_MAFG_AP1.TGCTGAGTCAC	12003.7	16610.8	16421.5	14234.8	9175.18	9618.04	9400.86	8185.98	8766.35	8663.64	8292.75	8520.28	8613.86	8441.76	0.615839	0.608624	0.582568	0.843266	1.16691	1.15362	1.12084	1.17494	1.14841	1.04084	1.05227	1.03125	TGCTGAGTCACTGCTGAGTCACTGCTGAGTCACTGCTGAGTCACTGCTGAGTCACTGCTGAGTCACTGCTGAGTCACTGCTGAGTCA	0.00607696	0.0156183	0.0101047	0.105736	1.14806	1.0546	0	0	cluster_67_NEF2_MAFG_AP1	0	0.545455	0.105736	0.0156183	0.657023	0.0109444
>1_top25_packed_set.top25_packed_cluster_42_jun_noncanonical_creblike.GTGATGTCAC	10852.6	12084.2	14693.7	12962.2	6885.78	7123.12	7333.7	6363.78	11150.7	11872.8	12013.6	7476.27	7222.77	6920.11	0.860244	0.915955	0.926813	0.837245	0.932264	1.13358	1.08203	1.11932	1.15241	1.17482	1.13498	1.08742	GTGATGTCACGTGATGTCACGTGATGTCACGTGATGTCACGTGATGTCACGTGATGTCACGTGATGTCACGTGATGTCACGTGATGT	0.0252618	0.0203307	0.0206196	0.0873585	1.13241	0.967695	0.091954	8	cluster_42_jun_noncanonical_creblike	0	0.5	0.0873585	0.0252618	1.25298	0.0345271
>1_top25_packed_set.top25_packed_AP1_alt5.GTGAGGAAGCA	34.9895	15.1305	25.6787	61.9469	58.6166	91.4262	82.5764	89.884	68.3193	62.7171	61.0946	93.4714	95.297	112.828	1.10287	1.01243	0.986242	0.564831	0.24425	0.414527	0.652137	1.01716	0.9187	1.03991	1.06022	1.25526	GTGAGGAAGCAGTGAGGAAGCAGTGAGGAAGCAGTGAGGAAGCAGTGAGGAAGCAGTGAGGAAGCAGTGAGGAAGCAGTGAGGAAGC	0.0686487	0.109034	0.0353292	0.0926036	1.11847	1.03385	0	0	AP1_alt5	0	0.545455	0.0353292	0.0686487	0.439128	0.226548
>1_top25_packed_set.top25_packed_NFYshort.ACCAATCAG	164.451	165.175	176.082	63.7168	78.7138	77.2044	79.8238	70.2729	159.086	234.465	207.891	34.5125	68.6881	42.6916	2.49677	3.67981	3.26274	2.58096	2.59232	2.76351	1.12012	1.09864	1.13591	0.491121	0.977448	0.607511	ACCAATCAGACCAATCAGACCAATCAGACCAATCAGACCAATCAGACCAATCAGACCAATCAGACCAATCAGACCAATCAGACCAAT	0.146612	0.0108021	0.346427	0.0590475	1.11822	3.14644	0	0	NFYshort	0	0.444444	0.346427	0.0108021	0.0250732	0.00824567
>1_top25_packed_set.top25_packed_PWM_atoh1_long.CAGaACAGATGGcaTC	83.9748	35.3045	77.036	66.6667	130.631	123.933	133.04	116.032	36.5996	56.9278	38.1841	126.546	128.094	109.778	0.548995	0.853917	0.572762	1.25962	0.529568	1.15554	1.12582	1.0681	1.14658	1.09061	1.10395	0.946104	CAGaACAGATGGcaTCCAGaACAGATGGcaTCCAGaACAGATGGcaTCCAGaACAGATGGcaTCCAGaACAGATGGcaTCCAGaACA	0.0505398	0.0234786	0.0979203	0.227993	1.1135	0.981576	0	0	PWM_atoh1_long	0	0.5	0.227993	0.0234786	1.05705	0.0402277
>1_top25_packed_set.top25_packed_PWM_Yap7_half_Emxdlx_half_NFE2_clust5and64and67_like_mafflike.ATTAGTCAGCA	50.1516	35.3045	27.5128	75.5162	164.127	146.282	211.029	158.523	20.4958	53.0683	41.5783	113.604	130.569	152.47	0.271409	0.702741	0.550587	0.664117	0.467509	0.36433	1.03535	0.922783	1.33122	0.71664	0.823663	0.961819	ATTAGTCAGCAATTAGTCAGCAATTAGTCAGCAATTAGTCAGCAATTAGTCAGCAATTAGTCAGCAATTAGTCAGCAATTAGTCAGC	0.0709669	0.121799	0.126302	0.0879308	1.09645	0.508246	0	0	PWM_Yap7_half_Emxdlx_half_NFE2_clust5and64and67_like_mafflike	0	0.363636	0.126302	0.121799	1.93992	0.51143
>1_top25_packed_set.top25_packed_cluster_45_atoh1_middle.ACCATCTGCT	21207.1	22270.8	21084	32109.1	19153.4	20314.9	19628.4	18427.8	20950.6	18955	19579.1	19027.9	18660.3	18140.9	0.652481	0.590331	0.609768	0.66047	0.693598	0.656636	1.03937	1.1024	1.06515	1.03256	1.01261	0.984428	ACCATCTGCTACCATCTGCTACCATCTGCTACCATCTGCTACCATCTGCTACCATCTGCTACCATCTGCTACCATCTGCTACCATCT	0.0139629	0.0182954	0.0183558	0.011734	1.06898	0.670235	0	0	cluster_45_atoh1_middle	0	0.5	0.011734	0.0182954	1.99874	0.0637066
>1_top25_packed_set.top25_packed_cluster_115.TGTCAATACGC	544.67	368.176	361.335	476.696	1993.8	2096.71	1980	1964.37	720.769	401.389	550.7	1918.32	2106.44	2018.7	1.51201	0.842024	1.15524	1.14259	0.772348	0.757999	1.01498	1.06737	1.00795	0.976556	1.07232	1.02766	TGTCAATACGCTGTCAATACGCTGTCAATACGCTGTCAATACGCTGTCAATACGCTGTCAATACGCTGTCAATACGCTGTCAATACG	0.0276654	0.0187434	0.193544	0.125875	1.0301	1.16976	0.091954	8	cluster_115	0.0909091	0.454545	0.193544	0.0187434	0.472933	0.249509
>1_top25_packed_set.top25_packed_PWM_atoh1_short.CAGATGGT	1193.14	1298.7	1366.47	1087.32	1133.81	1147.91	1222.13	1191.37	1140.93	1519.68	1339.84	1154.73	1191.21	1195.36	1.04931	1.39765	1.23224	1.09733	1.19441	1.25674	0.951688	0.963518	1.02582	0.969245	0.999867	1.00335	CAGATGGTCAGATGGTCAGATGGTCAGATGGTCAGATGGTCAGATGGTCAGATGGTCAGATGGTCAGATGGTCAGATGGTCAGATGG	0.0108349	0.0229935	0.100598	0.0463808	0.990822	1.2264	0	0	PWM_atoh1_short	0	0.5	0.100598	0.0108349	0.153293	1.51386
>1_top25_packed_set.top25_packed_PWM_emxdlx_long.TGCACTGTAATTAAC	3543.27	3229.1	2740.28	1852.51	2843.74	3350.26	3157.17	3276.68	3415.97	3363.57	2422.57	3236.99	3171.41	3207.97	1.84397	1.81568	1.30773	1.91269	1.7431	1.47923	0.867874	1.02246	0.963527	0.987886	0.967873	0.979031	TGCACTGTAATTAACTGCACTGTAATTAACTGCACTGTAATTAACTGCACTGTAATTAACTGCACTGTAATTAACTGCACTGTAATT	0.00578987	0.0450421	0.174225	0.126112	0.978263	1.71167	0	0	PWM_emxdlx_long	0	0.333333	0.126112	0.00578987	0.0299962	1.93581
>1_top25_packed_set.top25_packed_PWM_PF0149.1_CREB_middle.TGACGTCACAG	174.948	295.045	320.983	351.622	545.972	607.477	591.797	601.405	118.095	110.961	121.341	586.713	522.896	454.361	0.335857	0.315569	0.345088	0.497544	0.839095	0.912863	0.907827	1.01009	0.984024	0.975569	0.869457	0.755498	TGACGTCACAGTGACGTCACAGTGACGTCACAGTGACGTCACAGTGACGTCACAGTGACGTCACAGTGACGTCACAGTGACGTCACA	0.0635426	0.0306815	0.0087185	0.12793	0.967315	0.749834	0.091954	8	PWM_PF0149	0.0909091	0.545455	0.12793	0.0306815	1.8103	1.60167
>1_top25_packed_set.top25_packed_NFI_full.TTTGGCAGACTGCCAAA	27.9916	8.82613	7.33676	102.655	442.974	428.688	413.799	555.646	17.5678	14.4732	20.3649	559.39	562.5	469.608	0.171135	0.140989	0.198382	0.272677	0.0859786	0.0714701	0.797224	0.771511	0.744717	1.00674	1.01233	0.845156	TTTGGCAGACTGCCAAATTTGGCAGACTGCCAAATTTGGCAGACTGCCAAATTTGGCAGACTGCCAAATTTGGCAGACTGCCAAATT	0.0548174	0.0151583	0.016575	0.0647863	0.954743	0.170169	0	0	NFI_full	0	0.470588	0.016575	0.0548174	1.9996	1.50416
>1_top25_packed_set.top25_packed_MYBL1.ACCGTTAAACGG	37.3221	37.8263	16.5077	61.9469	90.4371	121.902	116.524	119.301	54.6555	25.0868	16.9707	87.7193	97.7723	116.894	0.882296	0.404973	0.273956	0.602486	0.610624	0.266482	0.758061	1.0218	0.97673	0.73528	0.819546	0.979825	ACCGTTAAACGGACCGTTAAACGGACCGTTAAACGGACCGTTAAACGGACCGTTAAACGGACCGTTAAACGGACCGTTAAACGGACC	0.0717219	0.0814478	0.184854	0.113382	0.918865	0.520408	0.16092	14	MYBL1	0.166667	0.5	0.184854	0.0814478	1.87803	1.57587
>1_top25_packed_set.top25_packed_clust23_emxdlx_short.CTGTAATTA	201.773	109.696	82.5385	116.224	1099.48	898.009	1070.74	1338.45	101.015	124.469	98.4302	766.465	759.901	902.622	0.869139	1.07094	0.8469	1.73607	0.943832	0.710166	0.821456	0.67093	0.799983	0.57265	0.567745	0.674377	CTGTAATTACTGTAATTACTGTAATTACTGTAATTACTGTAATTACTGTAATTACTGTAATTACTGTAATTACTGTAATTACTGTAA	0.0347553	0.047007	0.0712638	0.310439	0.764123	1.13002	0	0	clust23_emxdlx_short	0	0.222222	0.310439	0.047007	0.716034	1.9625
>1_top25_packed_set.top25_packed_SRF_long.ACCATATATGGC	337.066	399.697	205.429	523.304	667.392	621.698	668.869	866.155	569.979	397.53	353.84	670.118	538.366	526.53	1.08919	0.759654	0.676165	0.644111	0.763796	0.392562	0.770523	0.717769	0.772228	0.77367	0.621559	0.607894	ACCATATATGGCACCATATATGGCACCATATATGGCACCATATATGGCACCATATATGGCACCATATATGGCACCATATATGGCACC	0.0531279	0.0178758	0.126086	0.109396	0.753507	0.84167	0	0	SRF_long	0	0.416667	0.126086	0.0178758	1.66396	1.99478

## Sheet: TN04 Dinucleotide Exp.
label	KCl1_E	KCl2_E	KCl3_E	DNA_E	KCl1_P	KCl2_P	KCl3_P	DNA_P	Un1_E	Un2_E	Un3_E	Un1_P	Un2_P	Un3_P	E_U_1	E_U_2	E_U_3	E_K_1	E_K_2	E_K_3	P_K_1	P_K_2	P_K_3	P_U_1	P_U_2	P_U_3	tileSeq	P_U_SE	P_K_SE	E_U_SE	E_K_SE	maxP	maxE	maxE_SE	maxP_SE
>1_dinucleotide_set.dinuc_test_aatgtaCc._with_spacer_cgcgcgcgcgc_on_filler_tatatatatatatatatata_with_spacing_11	60.6485	143.74	91.7095	24.7788	500.754	479.48	493.623	768.099	141.519	2.89464	50.0636	488.927	452.351	394.389	5.71129	NA	2.02043	2.4476	5.80093	3.70113	0.651939	0.624242	0.642655	0.636542	0.588923	0.513461	atatataaatgtaCccgcgcgcgcgcaatgtaCccgcgcgcgcgcaatgtaCccgcgcgcgcgcaatgtaCccgcgcgcgcgctata	0.0358321	0.00813885	1.50679	0.978243	0.639612	3.98322	0.978243	0.00813885
>1_dinucleotide_set.dinuc_test_aatgtaCc._with_spacer_cacacacacac_on_filler_gagagagagagagagagaga_with_spacing_11	53.6506	15.1305	40.3522	85.5457	89.5997	130.028	156.895	99.6895	32.6957	108.066	19.5163	57.5209	58.7871	134.174	0.382201	1.26326	0.228139	0.627157	0.17687	0.471703	0.898788	1.30433	1.57384	0.577	0.589702	1.34592	agagagaaatgtaCccacacacacacaatgtaCccacacacacacaatgtaCccacacacacacaatgtaCccacacacacacgaga	0.254214	0.196185	0.322445	0.132046	1.25899	0.624533	0.322445	0.196185
>1_dinucleotide_set.dinuc_test_aatgtaCc._with_spacer_gagagagagag_on_filler_gagagagagagagagagaga_with_spacing_11	60.6485	39.0871	47.6889	109.145	151.566	190.979	217.451	227.161	44.4076	76.2254	32.2444	153.868	166.46	154.503	0.406869	0.698389	0.295428	0.555671	0.358123	0.436934	0.667217	0.840721	0.957254	0.677353	0.732785	0.680146	agagagaaatgtaCcgagagagagagaatgtaCcgagagagagagaatgtaCcgagagagagagaatgtaCcgagagagagaggaga	0.0180299	0.0842632	0.120134	0.0574143	0.821731	0.466896	0.120134	0.0842632
>1_dinucleotide_set.dinuc_test_TGACGTCA._with_spacer_cacacacacac_on_filler_cacacacacacacacacaca_with_spacing_11	463.028	259.74	260.455	376.991	242.003	217.391	206.441	321.948	386.98	346.391	349.597	225.769	223.391	226.672	1.0265	0.918832	0.927335	1.22822	0.688982	0.690878	0.751683	0.675237	0.641224	0.70126	0.693873	0.704064	acacacaTGACGTCAcacacacacacTGACGTCAcacacacacacTGACGTCAcacacacacacTGACGTCAcacacacacaccaca	0.00303946	0.0326616	0.0345586	0.179431	0.699733	0.957554	0.0345586	0.00303946
