# Supplementary material for: High-throughput functional comparison of promoter and enhancer activities
Source: HighWire-hosted journal article supplement (doi:10.1101/gr.204834.116), 2016-06-16
Supplement: Supplemental_Table_S4.xlsx [file Supplemental_Table_S4.xlsx]

## Sheet: KEY
Column Name	Description
name	TF name associated with motif
seq	Full sequence of motif
CBPTSS.nCenter.2.	Counts within annotated promoters
CBPTSS.nFlank.8.	Counts within flanks of annotated promoters
CBPTSS.ratio	Ratio of counts within annotated promoters to the respective flanking sequences
CBPnTSS.nCenter.2.	Counts within distal enhancers
CBPnTSS.nFlank.8.	Counts within flanks of distal enhancers
CBPnTSS.ratio	Ratio of counts within distal enhancers to the respective flanking sequences
CpG	CpG fraction of a single motif

## Sheet: Motif Data
name	seq	CBPTSS.nCenter.2.	CBPTSS.nFlank.8.	CBPTSS.ratio	CBPnTSS.nCenter.2.	CBPnTSS.nFlank.8.	CBPnTSS.ratio	CpG	p binom (proximal)	p binom (distal)
YGACNNYACAR	TGACRTCACAR	91	52	7	27	15	7.2	0	2.25961e-22	8.87196e-08
YY2	NNCCGCCATNW	1554	1160	5.3586	80	200	1.6	0.0909091	2.06358e-278	0.0961749
Creb5	NATGACGTCAYN	65	52	5	30	19	6.3158	0.0833333	1.88632e-12	8.64487e-08
ATGGYGGA	ATGGCGGA	297	297	4	22	59	1.4915	0.125	3.82571e-39	0.367049
CST6	RTGACGTMR	516	532	3.8797	179	141	5.078	0.111111	7.40839e-64	5.56107e-32
RYTGCNNRGNAAC	GTTGCYWRGMAAC	39	41	3.8049	39	21	7.4286	0	3.92925e-06	7.59303e-11
cluster_148	GATGKMRGCG	277	292	3.7945	19	38	2	0.1	4.55098e-34	0.0992241
RYTGCNWTGGNR	GYTGCYATGGMR	77	97	3.1753	141	57	9.8947	0	2.58841e-08	2.89134e-42
YY1	NCCGCCATTNN	202	258	3.1318	16	70	0.9143	0.0909091	8.91885e-19	0.936399
cluster_14_CREB_ATF	TGACGTCA	478	622	3.074	182	174	4.1839	0.125	1.45046e-40	4.01715e-26
GTCNYYATGR	GTCKCYATGG	125	169	2.9586	57	72	3.1667	0	4.18134e-11	1.64026e-06
cluster_103	ACAWNRNSRCGG	183	266	2.7519	17	54	1.2593	0.0833333	1.84612e-13	0.62617
cluster_70	CGTSACG	392	601	2.609	31	49	2.5306	0.285714	8.39579e-24	0.00458199
JDP2	ATGASTCAT	92	144	2.5556	202	87	9.2874	0	1.5384e-06	1.1742e-57
CREB1	TGACGYMW	728	1164	2.5017	359	393	3.6539	0.125	2.56751e-38	2.88423e-41
GTTRYCATRR	GTTGCCATRG	88	141	2.4965	195	96	8.125	0	5.02407e-06	3.27854e-51
cluster_3	SCGGAAGY	5226	8638	2.42	632	1883	1.3425	0.125	7.21058e-239	0.448122
ETV6	CCGGAASCGGAAGTN	769	1272	2.4182	118	462	1.0216	0.133333	8.03619e-37	0.99643
cluster_115	YRTCANNRCGC	214	364	2.3516	44	59	2.9831	0.0909091	1.04231e-10	6.42392e-05
cluster_88	GGCNKCCATNK	1826	3130	2.3335	358	961	1.4901	0	3.41671e-76	0.039722
cluster_22	TGCGCANK	1790	3069	2.333	170	544	1.25	0.125	1.11669e-74	0.780824
cluster_156	YRCCAKNNGNCGC	140	245	2.2857	11	23	1.913	0.0769231	4.93902e-07	0.210555
STP1	YGCGGCKS	4653	8411	2.2128	108	233	1.8541	0.125	3.8178e-160	0.00325163
cluster_19	GKCGCNNNNNNNTGAYG	640	1160	2.2069	83	175	1.8971	0.0588235	1.61799e-23	0.0057195
cluster_102	ATGGYGGA	479	874	2.1922	69	395	0.6987	0	1.14523e-17	1
CREB_from_MA0018.2	TGACGT	1386	2553	2.1716	742	947	3.1341	0.166667	4.49721e-46	3.22696e-64
cluster_11_STAT_E12_ETS	MGGAAGTG	4175	7871	2.1217	857	3269	1.0486	0	1.81918e-123	1
EGR_from_MA0162.1_JASPAR	GCGYGGGYG	689	1335	2.0644	32	40	3.2	0.111111	6.69456e-20	0.000255392
cluster_157	KCCGNSWTTT	235	459	2.0479	46	139	1.3237	0.1	1.12112e-07	0.545101
hlh-2::hlh-14	NKRRCASCTGTYMMNW	23	46	2	21	30	2.8	0	0.0752046	0.00817658
RFX3	NGTTNCCATGGNAACN	17	34	2	62	16	15.5	0	0.114501	8.84891e-24
bZIP910	MTGACGT	642	1286	1.9969	425	550	3.0909	0.142857	2.13541e-16	1.19463e-36
GTTGNYNNRGNAAC	GTTGYCMKRGNAAC	29	60	1.9333	91	36	10.1111	0	0.0659038	3.56874e-28
WCTCNATGGY	TCTCYATGGY	120	250	1.92	70	131	2.1374	0	0.000789756	0.00119551
Gamyb	SRYAACSGMC	129	279	1.8495	27	53	2.0377	0	0.00152992	0.0498872
E2F1	NNNTGGCGCCANNN	86	200	1.72	11	18	2.4444	0.0714286	0.0297308	0.0855358
FHL1	GACGCAMM	293	692	1.6936	82	146	2.2466	0.125	0.000412316	0.000151529
MBP1::SWI6	WCGCGTY	815	1935	1.6848	106	141	3.0071	0.285714	1.98961e-08	6.24883e-10
CYTAGCAAY	CYTAGCAAC	146	352	1.6591	166	136	4.8824	0	0.0160179	1.3481e-28
cluster_69	SGCGSSAAA	603	1546	1.5602	100	143	2.7972	0.111111	0.000655993	2.53828e-08
RDR1	WGCGGAAM	348	911	1.528	77	144	2.1389	0.125	0.0172819	0.00069805
GTTNYYNNGGTNA	GTTRCYMWGGTRA	16	43	1.4884	63	31	8.129	0	0.401646	1.25018e-17
RFX1	SGTTRCYA	652	1778	1.4668	604	791	3.0544	0	0.020223	3.86969e-50
MEF2D	NCTAWAAATAGM	15	42	1.4286	61	40	6.1	0	0.459412	5.46832e-14
MEF2A	CTATTTWTAG	27	76	1.4211	91	78	4.6667	0	0.42505	1.13601e-15
cluster_87	RYTGCNWTGGNR	418	1177	1.4206	466	637	2.9262	0	0.139307	5.73167e-36
cluster_37	GTTRYCATRR	520	1483	1.4026	690	816	3.3824	0	0.166568	1.65662e-68
TGA1A	WACGTCA	312	892	1.3991	265	420	2.5238	0.142857	0.241447	2.0879e-15
Ascl2	RRCAGCTGYY	220	641	1.3729	208	347	2.3977	0	0.366822	5.46798e-11
TGTYNNNNNRGCARM	TGTYKYSMWRGCARM	14	43	1.3023	48	37	5.1892	0	0.581026	6.59635e-10
E2F1	TTTSGCGC	119	376	1.266	22	30	2.9333	0.125	0.704981	0.00469096
cluster_89	GTTNYYNNGGTNA	813	2603	1.2493	900	1231	2.9245	0	0.950069	1.37433e-67
cluster_43	GTTGNYNNRGNAAC	746	2476	1.2052	729	1428	2.042	0	0.993027	4.31264e-20
8mer_51	TGCACGAT	84	286	1.1748	47	79	2.3797	0.125	0.860477	0.00148587
NFE2	NATGASTCATN	27	92	1.1739	168	68	9.8824	0	0.751248	5.28383e-50
TGANNYRGCA	TGASKYRGCA	125	449	1.1136	175	280	2.5	0	0.967986	1.67444e-10
8mer_37	TGGTACGA	17	64	1.0625	12	23	2.087	0.125	0.83174	0.142113
class	CYWWWTWWRG	694	2657	1.0448	964	1885	2.0456	0	1	3.67117e-26
RIM101	YGCCAAG	1125	4331	1.039	1292	1887	2.7387	0	1	2.98792e-83
motif_74	TGCSRAAA	639	2471	1.0344	556	1043	2.1323	0	1	2.03247e-18
ARG81	RTGACTCH	810	3186	1.0169	1573	1887	3.3344	0	1	8.37913e-150
GMEB2	TTACGYAM	60	236	1.0169	49	86	2.2791	0.125	0.976235	0.00232249
cluster_35	GCANCTGNY	6269	25271	0.9923	7335	13354	2.1971	0	1	6.86861e-245
cluster_7_AP1	TGANTCA	4716	19038	0.9909	7221	10688	2.7025	0	1	0
cluster_27	TGGNNNNNNKCCAR	1797	7547	0.9524	1872	3359	2.2292	0	1	2.2433e-67
TGGNNNNNNKCCAR	TGGMNNSNRKCCAR	106	447	0.9485	177	234	3.0256	0	0.999524	1.11637e-15
CAGNYGKNAAA	CAGMTGKSAAA	42	183	0.918	67	97	2.7629	0	0.99019	6.12333e-06
cluster_32_NFE_NRF	TGASTMAGC	351	1531	0.917	539	758	2.8443	0	1	6.00169e-39
Fos	RTGASTMA	742	3253	0.9124	3212	2130	6.0319	0	1	0
run::Bgb	WAACCGCAR	45	200	0.9	26	43	2.4186	0.111111	0.994543	0.0133304
CCANNAGRKGGC	CCASYAGRKGGC	30	136	0.8824	46	46	4	0	0.986647	2.18377e-07
hlh-2::lin-32	NMRMMCAKMTGKYMYS	21	96	0.875	52	59	3.5254	0	0.972688	5.19483e-07
hlh-2::hlh-19	KNKRMCAKSTGKBMMN	74	343	0.863	100	194	2.0619	0	0.999842	0.000341873
AP1_from_MA0099.2_JASPAR	TGACTCA	480	2247	0.8545	1904	1338	5.6921	0	1	0
TGANTCA	TGASTCA	480	2247	0.8545	1904	1338	5.6921	0	1	0
nub	TATGYAAATKMK	12	58	0.8276	39	47	3.3191	0	0.956058	3.29768e-05
NFIX	NNTGCCAAN	1629	7934	0.8213	3120	4988	2.502	0	1	1.32138e-157
NFIA	NNTGCCAANN	1625	7916	0.8211	3108	4978	2.4974	0	1	3.22353e-156
cluster_47_motif_22_NFI	TGCCAAR	2648	12942	0.8184	4329	7998	2.165	0	1	5.57047e-138
NFE2L2	RTGACWMAGCA	18	88	0.8182	63	66	3.8182	0	0.981701	4.64988e-09
twi	YMSCMYRTGTTS	37	182	0.8132	66	106	2.4906	0	0.998468	7.39274e-05
8mer_11	GTGCCAAA	2176	11006	0.7908	3929	7327	2.1449	0	1	3.38491e-121
YAP7	MTTAGTMAKMR	31	157	0.7898	80	106	3.0189	0	0.998112	6.39812e-08
Dlx2	VRDRYAATTRBHYMRS	15	78	0.7692	30	52	2.3077	0	0.98543	0.0131082
motif_103	TRTAANTAC	157	826	0.7603	299	578	2.0692	0	1	1.13077e-09
AGL3	CCAWWWWTRG	94	510	0.7373	196	361	2.1717	0	1	5.53724e-08
POU6F2	NSCTMATTAN	429	2366	0.7253	1318	2182	2.4161	0	1	1.47265e-61
cluster_64	TTANTCA	1259	7467	0.6744	2724	4977	2.1893	0	1	3.47446e-91
8mer_10	GCCAAAAA	91	561	0.6488	157	311	2.0193	0	1	2.15154e-05
PAX4	CTAATTAG	18	111	0.6486	95	116	3.2759	0	0.999265	2.16731e-10
POU2F3	TATGCWAAT	87	540	0.6444	291	534	2.1798	0	1	3.34451e-11
POU2F1	NWTATGCWAATN	66	410	0.6439	238	429	2.2191	0	1	5.64894e-10
YATGNWAAT	YATGYWAAT	194	1213	0.6397	549	1005	2.1851	0	1	8.8949e-20
POU2F2	NTATGCWAATN	86	538	0.6394	290	534	2.1723	0	1	4.74315e-11
Nobox	TAATTRSY	366	2298	0.6371	1384	1935	2.861	0	1	3.75704e-98
Pou2f2	NWTRMATATKYAWN	71	447	0.6353	222	440	2.0182	0	1	5.49662e-07
8mer_1_8mer_15_RC	AGTGCAAT	42	270	0.6222	69	137	2.0146	0	1	0.00388364
YWATTWNNRGCT	YWATTWKWRGCT	17	116	0.5862	68	123	2.2114	0	0.999835	0.000715834
POU3F2	NWTGMATAAWTNA	28	192	0.5833	105	170	2.4706	0	0.999998	9.50591e-07
POU3F1	WTATGCWAATNW	43	297	0.5791	182	263	2.7681	0	1	1.47854e-13
LHX2	NCTAATTANN	154	1080	0.5704	731	1000	2.924	0	1	2.98716e-55
exex	STAATTA	345	2423	0.5695	1599	2129	3.0042	0	1	3.22752e-125
ISX	NTAATYTAATTAN	1180	8333	0.5664	3398	6475	2.0992	0	1	8.0836e-97
DLX2	NYAATTAN	1178	8321	0.5663	3393	6464	2.0996	0	1	9.13984e-97
MSX1	NYAATTAAAANNYAATTA	1178	8322	0.5662	3393	6466	2.099	0	1	1.19594e-96
HESX1	NNTAATTRNN	1172	8298	0.565	3379	6449	2.0958	0	1	1.07523e-95
LBX2	AATTGGCCAATTA	1171	8296	0.5646	3379	6447	2.0965	0	1	8.22573e-96
ALX3	NNYAATTANN	1175	8344	0.5633	3394	6505	2.087	0	1	1.58117e-94
MEOX1	NSTAATTANN	277	1967	0.5633	1240	1714	2.8938	0	1	2.48664e-90
Pph13	MTAATTR	764	5447	0.561	2604	4452	2.3396	0	1	1.25882e-108
Vsx2	KWTAATTAG	49	355	0.5521	261	336	3.1071	0	1	2.01496e-23
squamosa	MYAWAWAWRGWAAK	13	104	0.5	39	77	2.026	0	0.999948	0.0233015
VAX1	YTAATTAN	320	2646	0.4837	1323	2268	2.3333	0	1	9.47322e-56
LMX1A	NTAATTAN	411	3434	0.4787	1758	2891	2.4324	0	1	5.3412e-83
Lhx8	NTAATTANNNNTAATTAN	411	3438	0.4782	1758	2894	2.4299	0	1	9.37477e-83
HOXD8	NNTAATTANN	409	3425	0.4777	1745	2884	2.4202	0	1	3.10677e-81
TAL1::TCF3	MSAMCAKMTGKT	14	121	0.4628	113	87	5.1954	0	0.999995	2.80916e-21
BHLHA15	NNCATATGNN	312	2726	0.4578	1258	2026	2.4837	0	1	1.54836e-63
LHX6	NYTAATTARN	111	1015	0.4374	444	880	2.0182	0	1	2.31343e-12
BHLHE22	NANCATATGNTN	13	144	0.3611	128	129	3.969	0	1	1.1327e-17
BHLHE23	ANCATATGNT	13	145	0.3586	129	129	4	0	1	5.64234e-18
Atoh1	RNCATATGNY	49	622	0.3151	400	410	3.9024	0	1	2.43575e-50
