# Supplementary material for: High-throughput functional comparison of promoter and enhancer activities
Source: HighWire-hosted journal article supplement (doi:10.1101/gr.204834.116), 2016-06-16
Supplement: Supplemental_Table_S5.xlsx [file Supplemental_Table_S5.xlsx]

## Sheet: TN05
label	Un1_E	Un2_E	Un3_E	KCl1_E	KCl2_E	KCl3_E	DNA_E	Un1_P	Un2_P	Un3_P	KCl1_P	KCl2_P	KCl3_P	DNA_P	Un1_E_DN	Un2_E_DN	Un3_E_DN	KCl1_E_DN	KCl2_E_DN	KCl3_E_DN	Un1_P_DN	Un2_P_DN	Un3_P_DN	KCl1_P_DN	KCl2_P_DN	KCl3_P_DN	seq	negCntl	ActivKCl1_P	ActivKCl2_P	ActivKCl3_P	ActivUn1_P	ActivUn2_P	ActivUn3_P	ActivKCl1_E	ActivKCl2_E	ActivKCl3_E	ActivUn1_E	ActivUn2_E	ActivUn3_E	ActivKCl1_P_DN	ActivKCl2_P_DN	ActivKCl3_P_DN	ActivUn1_P_DN	ActivUn2_P_DN	ActivUn3_P_DN	ActivKCl1_E_DN	ActivKCl2_E_DN	ActivKCl3_E_DN
activeMutant_.ip.-1561984360_mm_chr13:22036870$scrRFX5_scrRFX5at-37^RFX5_RFX5at22_1	1462	1592	687	860	1522	751	1985	1076	1655	1734	2431	1272	1711	1698	1834	3926	2530	2351	1490	1033	1352	2152	1181	1774	1015	2442	AAAAGTAATTCAGAAACACTGCGCGTTGCATTCCGAGAGTGATGCTCCTTTGTGTTCCCCGGTGAGGCGCTCCTGTGTGTTGCGGGGAGGGGGAAACCAAGGGAAAGGGTCTACGCGACCGGAAGTGACCGCTAAGCC	FALSE	1.08264	1.04636	1.02422	1.02121	1.03775	1.02052	1.2637	1.20828	1.30282	1.27357	1.58443	1.25673	1.07835	1.03549	1.02739	0.949325	0.902849	0.988642	1.16611	1.07118	1.0244
activeMutant_.If.1131500696_mm_chr13:22036870$RFX5_RFX5at22^scrRFX5_scrRFX5at-37_1	17738	21122	9811	7053	13179	6203	13015	7580	12188	13175	14971	8188	10633	9890	16272	37887	31727	18293	11620	8328	10419	17360	9002	11135	6214	15574	AAAAGTAATTCAGAAACACTGCGCGTTGCATTCTGGGAATTGTGGTCCTTTGTGTTCCCCGGTGAGGCGCTCCTGTGTGTTGCGGGGAGGGCCTTTGGTTCCCTTTCGGTCTACGCGACCGGAAGTGACCGCTAAGCC	FALSE	1.1447	1.15641	1.0928	1.23513	1.31211	1.33127	1.58065	1.59571	1.64121	2.35665	3.20613	2.73726	1.16208	1.08841	1.12494	1.25605	1.25044	1.29381	1.55781	1.43425	1.41791
activeMutant_.ip.731120773_mm_chr13:22036870$RFX5_RFX5at22^scrRFX5_scrRFX5at-37_1	16951	20967	11324	4743	10317	4867	6877	4090	6316	6671	6492	3561	4905	4262	9089	20451	19065	8244	6156	4417	4015	7066	3163	4539	2537	6611	AAAAGTAATTCAGAAACACTGCGCGTTGCATTCTGGGAATTGTGGTCCTTTGTGTTCCCCGGTGAGGCGCTCCTGTGTGTTGCGGGGAGGGCGTTGCCATGGCAACGGGTCTACGCGACCGGAAGTGACCGCTAAGCC	FALSE	1.15187	1.16705	1.16979	1.54649	1.57783	1.56419	2.01168	2.36412	2.43707	4.26217	6.0232	5.97926	1.09923	1.03115	1.1081	1.12318	1.18106	1.0549	1.62911	1.76319	1.7451
activeMutant_.i2.1043475163_mm_chr13:22036870$RFX5_RFX5at22^scrRFX5_scrRFX5at-37_1	3774	4257	2061	1378	2642	1207	2301	1064	1569	1801	1975	1065	1390	1424	3245	8125	6333	2993	2185	1564	1512	2441	1235	1597	802	2035	AAAAGTAATTCAGAAACACTGCGCGTTGCATTCTGGGAATTGTGGTCCTTTGTGTTCCCCGGTGAGGCGCTCCTGTGTGTTGCGGGGAGGGGCAAACCAAGGGATAGGGTCTACGCGACCGGAAGTGACCGCTAAGCC	FALSE	1.04881	1.04465	0.992172	1.20412	1.17313	1.26391	1.74678	1.80938	1.80633	2.83609	3.65491	3.25243	1.15754	0.975621	1.02089	1.26595	1.22115	1.23277	1.7702	1.87308	1.84941
active_.chr13:22036870_base_active_1	18748	21766	10873	6546	12039	5996	12180	6010	9444	10254	11989	6444	8471	8425	15442	39275	31368	13489	10489	7736	8427	13216	6925	8556	5126	12434	AAAAGTAATTCAGAAACACTGCGCGTTGCATTCTGGGAATTGTGGTCCTTTGTGTTCCCCGGTGAGGCGCTCCTGTGTGTTGCGGGGAGGGGGAAACCAAGGGAAAGGGTCTACGCGACCGGAAGTGACCGCTAAGCC	FALSE	1.0761	1.06836	1.02199	1.14959	1.19349	1.21628	1.5676	1.55761	1.6952	2.6616	3.53038	3.24152	1.0482	1.05396	1.05431	1.19256	1.11748	1.16836	1.34845	1.51977	1.54615
activeMutant_.i1.-1916585200_mm_chr13:22036870$RFX5_RFX5at22^scrRFX5_scrRFX5at-37_1	24701	28646	14269	8228	15133	8068	14496	8642	13043	13878	15689	8842	11604	10741	20130	50745	42898	17790	13120	9888	12122	18774	9593	11594	7028	17056	AAAAGTAATTCAGAAACACTGCGCGTTGCATTCTGGGAATTGTGGTCCTTTGTGTTCCCCGGTGAGGCGCTCCTGTGTGTTGCGGGGAGGGGGAAACCAAGGGAAGGGGTCTACGCGACCGGAAGTGACCGCTAAGCC	FALSE	1.10456	1.14984	1.09811	1.29661	1.2929	1.2912	1.65559	1.6451	1.91657	2.94646	3.90396	3.57431	1.11412	1.13345	1.13438	1.34557	1.24515	1.26951	1.39494	1.49109	1.55013
activeMutant_.i2.1708095571_mm_chr13:22036870$scrRFX5_scrRFX5at-37^RFX5_RFX5at22_1	547	570	251	290	616	291	791	308	526	595	658	416	568	532	701	1476	1024	816	485	449	451	775	449	541	367	874	AAAAGTAATTCAGAAACACTGCGCGTTGCATTCTGTGAATTGTCGTCCTTTGTGTTCCCCGGTGAGGCGCTCCTGTGTGTTGCGGGGAGGGGGAAACCAAGGGAAAGGGTCTACGCGACCGGAAGTGACCGCTAAGCC	FALSE	0.935303	1.09223	1.08522	0.932992	1.0527	1.11768	1.06937	1.22721	1.26684	1.19576	1.4236	1.15224	1.04961	1.19501	1.17361	1.01074	1.03777	1.19967	1.29182	1.11287	1.42115
activeMutant_.If.932094291_mm_chr13:22036870$scrRFX5_scrRFX5at-37^RFX5_RFX5at22_1	3497	3275	1721	1950	3692	1685	4682	2723	4408	4842	6096	3275	4461	4229	3659	8018	6084	4668	2820	2418	3711	6305	3165	4430	2563	6059	AAAAGTAATTCAGAAACACTGCGCGTTGCATTGACCCTTAACACCAGGTTTGTGTTCCCCGGTGAGGCGCTCCTGTGTGTTGCGGGGAGGGGGAAACCAAGGGAAAGGGTCTACGCGACCGGAAGTGACCGCTAAGCC	FALSE	1.09005	1.0817	1.0722	1.03764	1.10978	1.14419	1.21481	1.24264	1.2393	1.29151	1.38188	1.33474	1.08121	1.04985	1.0235	1.04623	1.06208	1.06381	0.929647	0.814002	0.962773
activeMutant_.i1.-1496976903_mm_chr13:22036870$scrRFX5_scrRFX5at-37^RFX5_RFX5at22_1	444	550	228	157	278	149	430	299	495	537	591	431	425	326	476	899	605	262	339	194	512	736	306	429	258	679	AAAAGTAATTCAGAAACACTGCGCGTTGCATTGTGGGAATTGAGGTCCTTTGTGTTCCCCGGTGAGGCGCTCCTGTGTGTTGCGGGGAGGGGGAAACCAAGGGAAAGGGTCTACGCGACCGGAAGTGACCGCTAAGCC	FALSE	1.37091	1.84668	1.32511	1.47806	1.61667	1.64614	1.06497	1.0188	1.19323	1.78545	2.52688	1.92536	1.35826	1.37094	1.48791	1.87253	1.60831	1.33423	0.676875	1.26939	1.00205
inducibleMutant_.If.708318807_mm_chr1:108068150$RFX5_RFX5at28^CREB5_CREB5at26_1	382	279	194	175	320	146	740	835	1193	1264	1528	759	983	885	271	674	407	472	250	173	1128	1753	958	998	644	1358	AAACCTCCTGGGAAACAGCTCCGCCCCACCCCCGTACGCACGCGTCACGTTTGTTTACCCTGAGGCCCCGCCCCCAGCCTCCCGCTCTCCGCAGAAAACAGCAGTACGATTGCATGCATATTCATGATCAACTCCGCC	FALSE	1.30562	1.19793	1.129	1.52048	1.43526	1.4273	0.689782	0.681448	0.679403	0.892619	0.744839	0.951955	1.16394	1.26055	1.09618	1.51964	1.41107	1.53868	0.449183	0.344835	0.329161
inducibleMutant_.ip.962626001_mm_chr1:108068150$RFX5_RFX5at28^CREB5_CREB5at26_1	900	795	573	709	1612	680	2147	1661	2675	2648	3666	1868	2548	2253	940	1568	1593	1312	962	717	2011	3398	1659	2312	1337	3332	AAACCTCCTGGGAAACAGCTCCGCCCCACCCCCGTACGCACGCGTCACGTTTGTTTACCCTGAGGCCCCGCCCCCAGCCTCCCGCTCTCCGCAGAAACGTTGCCATGGCAACGATGCATATTCATGATCAACTCCGCC	FALSE	1.23047	1.1581	1.14953	1.18808	1.26414	1.17454	0.963207	1.18317	1.09064	0.724844	0.731518	0.969101	1.05918	1.02799	1.0565	1.06421	1.07442	1.04668	0.490453	0.521228	0.535875
inducibleMutant_.i2.211403198_mm_chr1:108068150$RFX5_RFX5at28^CREB5_CREB5at26_1	552	513	275	545	860	397	1543	1241	2018	2088	2790	1561	1949	1626	488	1285	994	933	754	570	1551	2860	1461	1940	1187	2705	AAACCTCCTGGGAAACAGCTCCGCCCCACCCCCGTACGCACGCGTCACGTTTGTTTACCCTGAGGCCCCGCCCCCAGCCTCCCGCTCTCCGCAGAAATCTCGTCATGCTATCGATGCATATTCATGATCAACTCCGCC	FALSE	1.29754	1.34096	1.21835	1.22996	1.3214	1.28328	1.03023	0.878309	0.885994	0.618597	0.656812	0.647162	1.23147	1.26458	1.18843	1.13728	1.25301	1.27719	0.483266	0.566063	0.590282
inducibleMutant_.ip.577184717_mm_chr1:108068150$CREB5_CREB5at26^RFX5_RFX5at28_1	290	334	201	342	642	279	705	370	660	640	913	454	599	702	370	808	839	734	405	351	652	1198	495	619	454	874	AAACCTCCTGGGAAACAGCTCCGCCCCACCCCCGTACGCACGCGTCACGTTTGTTTACCCTGAGGCCCCGCCCCCAGCCTCCCGCTCTCCGCAGAAATGACGTCACCCTAACGATGCATATTCATGATCAACTCCGCC	FALSE	0.983494	0.903339	0.867305	0.849382	1.00101	0.911074	1.41495	1.43503	1.36277	0.711284	0.935938	1.03527	0.910114	1.1203	0.889406	1.10735	1.21571	1.00229	0.88061	0.704259	0.841929
inducibleMutant_.i1.-2084576674_mm_chr1:108068150$RFX5_RFX5at28^CREB5_CREB5at26_1	621	460	330	515	1065	548	1097	785	1269	1483	1666	972	1391	1370	502	1088	1103	1070	811	551	1205	1958	899	1317	717	1982	AAACCTCCTGGGAAACAGCTCCGCCCCACCCCCGTACGCACGCGTCACGTTTGTTTACCCTGAGGCCCCGCCCCCAGCCTCCCGCTCTCCGCAGAAATGACGTCATGCTAAGGATGCATATTCATGATCAACTCCGCC	FALSE	0.919587	0.99101	1.03202	0.923395	0.986219	1.08176	1.36932	1.52988	1.7202	0.978857	0.828402	1.09233	0.992219	0.9066	1.0335	1.04868	1.01813	0.932751	0.657791	0.722628	0.67723
inducibleMutant_.i1.479700120_mm_chr1:108068150$CREB5_CREB5at26^RFX5_RFX5at28_1	577	349	253	430	620	288	1288	812	1414	1445	1790	990	1293	1235	498	1021	920	647	545	349	1240	2175	1070	1296	850	1816	AAACCTCCTGGGAAACAGCTCCGCCCCACCCCCGTACGCACGCGTCACGTTTGTTTACCCTGAGGCCCCGCCCCCAGCCTCCCGCTCTCCGCAGAAATGTCGGCCTGCTAACGATGCATATTCATGATCAACTCCGCC	FALSE	1.09603	1.1197	1.06418	1.05957	1.21903	1.16926	0.973774	0.758561	0.769986	0.77463	0.535303	0.713265	1.08313	1.19225	1.05045	1.1971	1.25459	1.23153	0.441227	0.538696	0.475843
inducible_.chr1:108068150_base_inducible_1	820	628	354	738	1577	753	1680	1153	1904	1993	2490	1487	1975	1926	660	1375	1687	1690	1117	723	1541	2621	1482	1811	1061	2786	AAACCTCCTGGGAAACAGCTCCGCCCCACCCCCGTACGCACGCGTCACGTTTGTTTACCCTGAGGCCCCGCCCCCAGCCTCCCGCTCTCCGCAGAAATGTCGTCATGCTAACGATGCATATTCATGATCAACTCCGCC	FALSE	0.977645	1.07842	1.0423	0.964743	1.05255	1.0341	1.28131	1.47923	1.54345	0.843993	0.738483	0.765139	0.97052	0.95428	1.03336	0.953942	0.96944	1.09375	0.739018	0.707964	0.632102
inducibleMutant_.If.-1519164520_mm_chr1:108068150$CREB5_CREB5at26^RFX5_RFX5at28_1	858	722	446	574	1088	489	1887	1007	1591	1656	2079	1227	1594	1953	868	1831	1539	1231	872	627	1482	2309	1280	1569	946	2354	AAACCTCCTGGGAAACAGCTCCGCCCCACCCCCGTACGCACGCGTCACGTTTGTTTACCCTGAGGCCCCGCCCCCAGCCTCCCGCTCTCCGCAGATTACAGCAGTACCTAACGATGCATATTCATGATCAACTCCGCC	FALSE	0.80499	0.877555	0.829599	0.830933	0.867362	0.847362	0.887249	0.908598	0.892366	0.78623	0.755884	0.858241	0.829207	0.839085	0.861053	0.904736	0.842233	0.931611	0.530861	0.54504	0.540593
activeMutant_.ip.-1538259388_mm_chr5:136482331$scrRFX5_scrRFX5at-47^RFX5_RFX5at-25^scrRFX5_scrRFX5at19_1	5792	6870	3528	2966	5972	3237	3650	2490	3875	3921	6292	3107	4433	2741	4767	11051	9625	5618	4216	2972	2636	4469	2177	3462	1980	4773	AAACCTCGTCAAGCTATGAGCACCGAGAGTGATGCTCCCTTGTCTGTCCCCATGGTAACCCGTGCATGCATCTTGCCTCCCTTGTCTCCAGAGAGGCTTGTTCACCAGCTGACGACAGAGCCTCTCAGAATATAAAAT	FALSE	1.73587	1.5833	1.64388	1.46396	1.5052	1.42955	2.37019	2.57835	3.05391	2.74391	3.71838	3.5098	1.30365	1.25133	1.24396	1.1466	1.16148	1.12895	1.72623	1.87761	1.82577
activeMutant_.If.1947860600_mm_chr5:136482331$scrRFX5_scrRFX5at-47^RFX5_RFX5at-25^scrRFX5_scrRFX5at19_1	5677	5847	2937	2252	5100	2614	2778	2090	2875	3459	5954	3029	4287	2362	3487	8799	7502	4286	3127	2406	2371	3478	1895	3246	1810	4769	AAACCTCGTCAAGCTATGAGCACCTTGTAAATAACGTCCTTGTCTGTCCCCATGGTAACCCGTGCATGCATCTTGCCTCCCTTGTCTCCAGAGAGGCTTGTTCACCAGCTGACGACAGAGCCTCTCAGAATATAAAAT	FALSE	1.90619	1.79123	1.84483	1.42595	1.29596	1.46346	2.36451	2.89303	3.24026	3.53363	4.15806	3.839	1.41844	1.32744	1.44236	1.19682	1.04896	1.1404	1.52826	1.61608	1.71522
activeMutant_.i1.474949669_mm_chr5:136482331$scrRFX5_scrRFX5at-47^RFX5_RFX5at-25^scrRFX5_scrRFX5at19_1	10205	11211	5503	4336	9119	4464	4799	3460	5051	5353	8285	4198	6097	3475	6024	14206	13208	6955	5931	4063	3587	6231	3494	4597	2690	7145	AAACCTCGTCAAGCTATGAGCAGGAACATTTAATGCAGCTTGTCTGTCCCCATGGTAACCCGTGCATGCATCTTGCCTCCCTTGTCTCCAGAGAGGCTTGTTCACCAGCTGACGACAGAGCCTCTCAGAATATAAAAT	FALSE	1.80292	1.68741	1.78338	1.60457	1.54759	1.53941	2.63539	2.99441	3.20317	3.67703	4.61513	4.16385	1.36541	1.34096	1.46884	1.2307	1.27736	1.42921	1.68565	2.08347	1.96878
activeMutant_.ip.1973311587_mm_chr5:136482331$RFX5_RFX5at-25^scrRFX5_scrRFX5at-47^scrRFX5_scrRFX5at19_1	5695	6519	3384	3845	8228	4304	3511	2725	4443	4258	8286	4418	5652	2370	3602	8818	7246	4872	3626	2610	2535	4111	2123	3121	1808	4176	AAACCTCGTCAAGCTATGAGCAGGAACATTTATTGCAGCTTGTCCGTTGCCATGGCAACGCGTGCATGCATCTTGCCTCCCTTGTCTCCAGAGAGGCTTGTTCACCAGCTGACGACAGAGCCTCTCAGAATATAAAAT	FALSE	2.64384	2.60381	2.42402	1.85292	1.996	1.79543	3.19427	3.69299	4.22131	2.80477	3.66809	3.49982	1.35921	1.3215	1.25874	1.27528	1.23569	1.27329	1.73135	1.86764	1.85437
activeMutant_.i2.1303716225_mm_chr5:136482331$RFX5_RFX5at-25^scrRFX5_scrRFX5at-47^scrRFX5_scrRFX5at19_1	3254	3664	1648	1723	3650	1615	3974	1874	2696	3147	4077	2154	2931	2926	3948	8556	6749	3846	2732	2155	2854	4749	2241	3238	1887	4157	AAACCTCGTCAAGCTATGAGCAGGAACATTTATTGCAGCTTGTCTCTCCCCATGGTATCCCGTGCATGCATCTTGCCTCCCTTGTCTCCAGAGAGGCTTGTTCACCAGCTGACGACAGAGCCTCTCAGAATATAAAAT	FALSE	1.05367	1.02826	1.01818	1.03213	0.98102	1.07481	1.26463	1.44737	1.39943	1.41587	1.82145	1.50583	1.14221	1.11716	1.01492	1.16293	1.15621	1.08866	1.10703	1.13978	1.24016
activeMutant_.i1.-1018026783_mm_chr5:136482331$RFX5_RFX5at-25^scrRFX5_scrRFX5at-47^scrRFX5_scrRFX5at19_1	1199	1250	511	489	1067	571	1485	776	1027	1236	1755	864	1213	1108	1308	2875	2279	1638	1035	641	992	1847	847	1235	620	1799	AAACCTCGTCAAGCTATGAGCAGGAACATTTATTGCAGCTTGTCTGACCCCATGGTAAGCCGTGCATGCATCTTGCCTCCCTTGTCTCCAGAGAGGCTTGTTCACCAGCTGACGACAGAGCCTCTCAGAATATAAAAT	FALSE	1.19778	1.0892	1.11276	1.12865	0.986877	1.11478	0.960479	1.13228	1.32409	1.39613	1.66293	1.24951	1.15045	0.969324	1.15989	1.06745	1.18751	1.0866	1.24508	1.14029	0.974145
active_.chr5:136482331_base_active_1	9001	10066	5032	4603	9527	5191	4868	3253	4688	5001	8811	4567	6345	3477	6660	14362	12313	7028	5336	4306	3639	6059	3040	4801	2679	7061	AAACCTCGTCAAGCTATGAGCAGGAACATTTATTGCAGCTTGTCTGTCCCCATGGTAACCCGTGCATGCATCTTGCCTCCCTTGTCTCCAGAGAGGCTTGTTCACCAGCTGACGACAGAGCCTCTCAGAATATAAAAT	FALSE	1.91628	1.83467	1.85485	1.50771	1.43554	1.43735	2.75801	3.08404	3.67203	3.19723	4.08504	3.7535	1.42518	1.3347	1.45073	1.24782	1.24139	1.24278	1.70236	1.87338	2.08533
activeMutant_.i2.-814863551_mm_chr5:136482331$scrRFX5_scrRFX5at19^scrRFX5_scrRFX5at-47^RFX5_RFX5at-25_1	3398	3510	1747	1154	2738	1259	1741	1294	1927	1994	2618	1402	1726	1394	2182	4858	4059	2401	1631	1182	1274	2004	836	1562	900	2192	AAACCTCGTCAAGCTATGAGCAGGAACATTTATTGCAGCTTGTCTGTCCCCATGGTAACCCGTGCATGCATCTTGCCTCCCTTGTCTCCAGTGAGGCTTCTTCACCAGCTGACGACAGAGCCTCTCAGAATATAAAAT	FALSE	1.42019	1.40481	1.25852	1.49593	1.47181	1.42946	1.93336	2.47827	2.49019	3.37488	3.98289	3.64368	1.15654	1.1184	1.12332	1.08964	1.02411	0.852452	1.45062	1.42825	1.42778
activeMutant_.ip.-475151971_mm_chr5:136482331$scrRFX5_scrRFX5at19^scrRFX5_scrRFX5at-47^RFX5_RFX5at-25_1	7862	8689	4079	3590	7522	3616	4065	2213	3322	3566	5434	3078	3873	3186	5048	12382	9980	5114	3945	2849	2413	4323	2052	3158	1922	4557	AAACCTCGTCAAGCTATGAGCAGGAACATTTATTGCAGCTTGTCTGTCCCCATGGTAACCCGTGCATGCATCTTGCCTCCCTTGTCTCCCGAGAGTGATGCTCCCCAGCTGACGACAGAGCCTCTCAGAATATAAAAT	FALSE	1.28977	1.34944	1.23562	1.11937	1.11016	1.11853	2.57596	2.916	3.06319	3.34431	4.22279	3.64368	1.02308	1.04502	1.02178	0.902999	0.966607	0.9155	1.35188	1.51153	1.50575
activeMutant_.i1.-1966151327_mm_chr5:136482331$scrRFX5_scrRFX5at19^scrRFX5_scrRFX5at-47^RFX5_RFX5at-25_1	513	385	261	229	371	166	320	223	340	220	440	236	309	211	318	777	588	266	245	144	195	322	188	214	142	309	AAACCTCGTCAAGCTATGAGCAGGAACATTTATTGCAGCTTGTCTGTCCCCATGGTAACCCGTGCATGCATCTTGCCTCCCTTGTCTCGAGAGAGGCTAGTTCACCAGCTGACGACAGAGCCTCTCAGAATATAAAAT	FALSE	1.57692	1.56229	1.48853	1.70318	1.71565	1.04196	2.08733	1.827	1.78634	2.77205	2.37684	2.96167	1.04682	1.1658	1.04617	1.10186	1.08714	1.26649	1.06175	1.41742	1.14917
activeMutant_.If.-1804660682_mm_chr5:136482331$scrRFX5_scrRFX5at19^scrRFX5_scrRFX5at-47^RFX5_RFX5at-25_1	7591	8532	4189	2686	5819	2782	3350	2047	2892	2959	4463	2300	3094	2730	4651	10818	8956	4538	3606	2215	2285	3659	1852	2599	1567	4002	AAACCTCGTCAAGCTATGAGCAGGAACATTTATTGCAGCTTGTCTGTCCCCATGGTAACCCGTGCATGCATCTTGCCTCCCTTGTCTCGTCTCTCCGAACAAGTCCAGCTGACGACAGAGCCTCTCAGAATATAAAAT	FALSE	1.23624	1.17679	1.15197	1.20835	1.12789	1.08316	2.33866	2.73727	2.85969	3.91822	5.03148	4.54059	0.982621	0.994313	1.04723	0.997928	0.954795	0.964284	1.4	1.61242	1.36621
activeMutant_.i2.1364964468_mm_chr5:136482331$scrRFX5_scrRFX5at-47^RFX5_RFX5at-25^scrRFX5_scrRFX5at19_1	5498	5593	3165	3041	6330	3542	3812	3180	4689	4834	8133	4500	5746	3096	3670	9263	9327	4594	3839	3290	3631	6087	2939	4584	2425	6317	AAACCTCGTCAAGCTATGAGCAGGATCATTTATCGCAGCTTGTCTGTCCCCATGGTAACCCGTGCATGCATCTTGCCTCCCTTGTCTCCAGAGAGGCTTGTTCACCAGCTGACGACAGAGCCTCTCAGAATATAAAAT	FALSE	1.9865	2.03022	1.88646	1.65525	1.61254	1.56033	2.32685	2.61677	3.19965	2.49394	2.89856	3.01486	1.52822	1.35684	1.45759	1.3983	1.4006	1.34935	1.24973	1.51367	1.78937
inducibleMutant_.ip.1916731948_mm_chr19:10856230$CREB5_CREB5at-65^RFX5_RFX5at-56^CREB5_CREB5at-9^scrCREB5_scrCREB5at17^scrRFX5_scrRFX5at27^scrCREB5_scrCREB5at31_1	539	586	288	1785	2832	1727	477	428	634	841	2084	1071	1691	596	452	1411	858	3623	2164	1861	649	1146	466	1535	1172	2786	AAAGAATGACGTCACCTTTCTGGGTATCAGAATTCTATCCCACTGAGTTTATTTTGAGAGAATGATGTAAGTTTTATTTTTAAAATTTCAGTCTTGAAAATATGACATTGGACACGAAGTATGAATCACATCCTGCCT	FALSE	2.64417	2.51001	2.88389	1.15727	1.1326	1.41013	10.915	9.35599	12.4675	1.95391	2.427	2.1924	2.6583	3.40642	3.33934	1.2983	1.36977	1.11139	5.11973	4.43226	5.25782
inducibleMutant_.i2.323698290_mm_chr19:10856230$CREB5_CREB5at-65^RFX5_RFX5at-56^CREB5_CREB5at-9^scrCREB5_scrCREB5at17^scrRFX5_scrRFX5at27^scrCREB5_scrCREB5at31_1	421	387	191	1363	2486	1319	609	732	1004	1185	2968	1563	2114	1066	461	1255	702	2337	1571	1500	1113	1659	913	2436	1514	3660	AAAGAGGGCCATAAGTTTTCTGGGTATCAGAATTCTATCCCACTGAGTTTATTTTGAGAGAATGATGTAAGTTTTATTTTTAAAATTTCAGTCTTGAAAATATGACATTGGACACGAAGTATGAATCACATCCTGCCT	FALSE	2.10545	2.04802	2.01572	1.1066	1.00279	1.11089	6.52806	6.43278	7.4582	1.19536	1.2554	1.13884	2.35864	2.46029	2.45273	1.24484	1.10866	1.21742	1.8464	1.79901	2.36941
inducibleMutant_.i1.1496070332_mm_chr19:10856230$CREB5_CREB5at-65^RFX5_RFX5at-56^CREB5_CREB5at-9^scrCREB5_scrCREB5at17^scrRFX5_scrRFX5at27^scrCREB5_scrCREB5at31_1	191	229	108	513	1022	555	266	182	246	361	1035	446	637	365	191	534	277	990	698	612	301	542	240	651	438	1103	AAAGAGTGACAGACGTTTTCTGGGTATCAGAATTCTATCCCACTGAGTTTATTTTGAGAGAATGATGTAAGTTTTATTTTTAAAATTTCAGTCTTGAAAATATGACATTGGACACGAAGTATGAATCACATCCTGCCT	FALSE	2.1443	1.70677	1.7739	0.803558	0.717587	0.988382	5.62524	6.05458	7.18485	1.24161	1.70076	1.47431	1.8409	2.07873	2.15878	0.983217	1.05783	0.934641	2.28437	2.33441	2.82334
inducibleMutant_.i2.-368211573_mm_chr19:10856230$RFX5_RFX5at-56^CREB5_CREB5at-65^CREB5_CREB5at-9^scrCREB5_scrCREB5at17^scrRFX5_scrRFX5at27^scrCREB5_scrCREB5at31_1	436	422	252	1607	2504	1263	697	701	1253	1313	3071	1545	2262	1237	556	1325	951	2466	1482	1390	991	1721	872	2261	1435	3624	AAAGAGTGACATAACTTTTCTGGGTATCAGAATTCTATCCCACTGAGTTTATTTTGAGAGAATGATGTAAGTTTTATTTTTAAAATTTCAGTCTTGAAAATATGACATTGGACACGAAGTATGAATCACATCCTGCCT	FALSE	1.87736	1.74458	1.85868	0.913244	1.07848	1.06073	6.72494	5.6613	6.23989	1.08165	1.19611	1.31285	1.88657	2.00955	2.09288	0.955168	0.991109	1.00201	1.67899	1.46249	1.89213
inducibleMutant_.i1.-1366346312_mm_chr19:10856230$RFX5_RFX5at-56^CREB5_CREB5at-65^CREB5_CREB5at-9^scrCREB5_scrCREB5at17^scrRFX5_scrRFX5at27^scrCREB5_scrCREB5at31_1	286	386	225	949	1527	884	432	417	680	714	1716	854	1094	622	391	879	589	1780	1087	1017	560	763	439	1263	789	1592	AAAGAGTGACATAAGATTTCTGGGTATGAGAATTCTATCCCACTGAGTTTATTTTGAGAGAATGATGTAAGTTTTATTTTTAAAATTTCAGTCTTGAAAATATGACATTGGACACGAAGTATGAATCACATCCTGCCT	FALSE	2.08624	1.91778	1.78776	1.0804	1.16399	1.14715	6.40749	5.57019	7.04652	1.14477	1.7652	1.89123	2.09583	2.19737	1.82843	1.07343	0.873865	1.00323	2.41021	2.13331	2.75319
inducibleMutant_.i2.883391346_mm_chr19:10856230$CREB5_CREB5at-9^CREB5_CREB5at-65^RFX5_RFX5at-56^scrCREB5_scrCREB5at17^scrRFX5_scrRFX5at27^scrCREB5_scrCREB5at31_1	253	328	135	398	893	462	658	827	1310	1419	2882	1509	2127	1395	316	898	491	760	457	439	1124	1856	1047	1942	1179	2593	AAAGAGTGACATAAGTTTTCTGGGTATCAGAATTCTATCCCACTGAGTTTATTTTGAGAGAAGGCTGTAAGTTTTATTTTTAAAATTTCAGTCTTGAAAATATGACATTGGACACGAAGTATGAATCACATCCTGCCT	FALSE	1.56228	1.51094	1.5498	0.955366	0.999838	1.01653	1.76426	2.13865	2.41781	0.664858	0.984777	0.744997	1.43687	1.46405	1.32786	0.960656	0.947794	1.06684	0.458843	0.399904	0.529902
inducibleMutant_.ip.-1957160985_mm_chr19:10856230$CREB5_CREB5at-9^CREB5_CREB5at-65^RFX5_RFX5at-56^scrCREB5_scrCREB5at17^scrRFX5_scrRFX5at27^scrCREB5_scrCREB5at31_1	271	233	136	788	1150	659	360	279	415	478	1261	626	932	477	255	760	403	1359	812	669	332	741	408	963	582	1495	AAAGAGTGACATAAGTTTTCTGGGTATCAGAATTCTATCCCACTGAGTTTATTTTGAGAGAATGACGTCACCTTTATTTTTAAAATTTCAGTCTTGAAAATATGACATTGGACACGAAGTATGAATCACATCCTGCCT	FALSE	1.9991	1.83311	1.986	0.942594	0.926322	1.00143	6.38454	5.03396	6.30361	1.30167	1.27863	1.37178	2.08377	2.11359	2.23897	0.829842	1.10665	1.21582	2.39953	2.07803	2.36164
inducibleMutant_.i1.-1268917316_mm_chr19:10856230$CREB5_CREB5at-9^CREB5_CREB5at-65^RFX5_RFX5at-56^scrCREB5_scrCREB5at17^scrRFX5_scrRFX5at27^scrCREB5_scrCREB5at31_1	117	149	95	201	336	191	274	352	509	448	873	470	610	525	169	556	300	327	240	169	350	716	280	502	344	930	AAAGAGTGACATAAGTTTTCTGGGTATCAGAATTCTATCCCACTGAGTTTATTTTGAGAGAATGATGGACGTTTTATTTTTAAAATTTCAGTCTTGAAAATATGACATTGGACACGAAGTATGAATCACATCCTGCCT	FALSE	1.25746	1.25046	1.18101	1.08049	1.03226	0.852765	2.13969	1.93243	2.40043	0.738363	1.0743	1.25898	0.986931	1.13505	1.26546	0.794849	0.971547	0.758098	0.524582	0.558041	0.542042
inducibleMutant_.ip.-1287846054_mm_chr19:10856230$scrCREB5_scrCREB5at17^CREB5_CREB5at-65^RFX5_RFX5at-56^CREB5_CREB5at-9^scrRFX5_scrRFX5at27^scrCREB5_scrCREB5at31_1	359	353	175	535	997	486	650	820	1150	1092	1620	922	1165	853	418	830	551	1001	641	521	850	1526	824	1215	698	1731	AAAGAGTGACATAAGTTTTCTGGGTATCAGAATTCTATCCCACTGAGTTTATTTTGAGAGAATGATGTAAGTTTTATTTTTAAAATAACCCTCAAGGTAATATGACATTGGACACGAAGTATGAATCACATCCTGCCT	FALSE	1.43616	1.50978	1.38822	1.54919	1.43543	1.27934	2.40075	2.41711	2.57471	0.955027	1.07288	0.977622	1.47018	1.4175	1.44969	1.18808	1.27443	1.37311	0.988348	0.917325	1.02848
inducibleMutant_.If.1794257183_mm_chr19:10856230$scrCREB5_scrCREB5at17^CREB5_CREB5at-65^RFX5_RFX5at-56^CREB5_CREB5at-9^scrRFX5_scrRFX5at27^scrCREB5_scrCREB5at31_1	100	53	54	316	494	300	210	122	152	197	366	253	348	373	161	330	228	553	347	253	161	282	159	384	202	703	AAAGAGTGACATAAGTTTTCTGGGTATCAGAATTCTATCCCACTGAGTTTATTTTGAGAGAATGATGTAAGTTTTATTTTTAAAATAAGTCAGAACTTAATATGACATTGGACACGAAGTATGAATCACATCCTGCCT	FALSE	0.742011	0.947423	0.948314	0.527096	0.433878	0.527798	4.38908	3.707	4.91936	0.823408	0.498593	0.933729	1.06259	0.938122	1.34639	0.514627	0.53858	0.60592	1.24865	1.13562	1.14213
inducibleMutant_.i2.-1689151298_mm_chr19:10856230$scrCREB5_scrCREB5at17^CREB5_CREB5at-65^RFX5_RFX5at-56^CREB5_CREB5at-9^scrRFX5_scrRFX5at27^scrCREB5_scrCREB5at31_1	234	337	136	871	1534	893	552	546	933	1022	2087	1283	1567	800	267	838	549	1613	991	901	732	1405	687	1746	1063	2594	AAAGAGTGACATAAGTTTTCTGGGTATCAGAATTCTATCCCACTGAGTTTATTTTGAGAGAATGATGTAAGTTTTATTTTTAAAATCTCAGTCTTGAGAATATGACATTGGACACGAAGTATGAATCACATCCTGCCT	FALSE	1.97274	2.24011	1.99095	1.09987	1.24172	1.27665	4.6024	4.37926	5.57081	0.733012	1.20609	0.894636	2.25266	2.30176	2.31636	1.09093	1.25111	1.22066	1.69812	1.51216	1.89644
inducibleMutant_.i1.521272105_mm_chr19:10856230$scrCREB5_scrCREB5at17^CREB5_CREB5at-65^RFX5_RFX5at-56^CREB5_CREB5at-9^scrRFX5_scrRFX5at27^scrCREB5_scrCREB5at31_1	74	54	31	130	224	148	92	96	124	195	473	196	382	163	59	169	83	226	170	113	161	193	118	241	197	488	AAAGAGTGACATAAGTTTTCTGGGTATCAGAATTCTATCCCACTGAGTTTATTTTGAGAGAATGATGTAAGTTTTATTTTTAAAATTTCAGGCCTGAAAATATGACATTGGACACGAAGTATGAATCACATCCTGCCT	FALSE	2.19438	1.67958	2.38209	0.949122	0.809966	1.19552	4.12156	3.83685	5.53962	1.39084	1.15957	1.22355	1.52606	2.09361	2.13874	1.17764	0.84349	1.02901	1.16774	1.27314	1.16734
inducibleMutant_.ip.1528537767_mm_chr19:10856230$scrCREB5_scrCREB5at31^CREB5_CREB5at-65^RFX5_RFX5at-56^CREB5_CREB5at-9^scrCREB5_scrCREB5at17^scrRFX5_scrRFX5at27_1	937	1057	461	1713	3191	1733	1534	1527	2550	2589	4820	2645	3172	2268	1086	3131	2026	3370	2066	1621	2129	3417	1819	3251	1992	4673	AAAGAGTGACATAAGTTTTCTGGGTATCAGAATTCTATCCCACTGAGTTTATTTTGAGAGAATGATGTAAGTTTTATTTTTAAAATTTCAGTCTTGAAAAAACCCTCAAGGTCACGAAGTATGAATCACATCCTGCCT	FALSE	1.6071	1.62898	1.42158	1.08501	1.1971	1.14077	3.25715	3.27805	3.89027	1.05621	1.36126	1.09124	1.4795	1.52147	1.4719	1.1192	1.07328	1.14003	1.25144	1.11199	1.2035
inducibleMutant_.If.904522957_mm_chr19:10856230$scrCREB5_scrCREB5at31^CREB5_CREB5at-65^RFX5_RFX5at-56^CREB5_CREB5at-9^scrCREB5_scrCREB5at17^scrRFX5_scrRFX5at27_1	565	469	237	1709	2848	1684	725	829	1185	1391	3167	1762	2459	1307	561	1613	1039	3103	1995	1982	1056	1995	897	2783	1632	4083	AAAGAGTGACATAAGTTTTCTGGGTATCAGAATTCTATCCCACTGAGTTTATTTTGAGAGAATGATGTAAGTTTTATTTTTAAAATTTCAGTCTTGAAAAATACTGTAACCTCACGAAGTATGAATCACATCCTGCCT	FALSE	1.83236	1.88305	1.91234	1.02216	0.965329	1.06356	6.87559	6.19037	7.99853	1.34755	1.27798	1.18702	2.19776	2.16302	2.23167	0.963305	1.08737	0.975537	1.99954	1.86329	2.55349
inducibleMutant_.i2.1012716798_mm_chr19:10856230$scrCREB5_scrCREB5at31^CREB5_CREB5at-65^RFX5_RFX5at-56^CREB5_CREB5at-9^scrCREB5_scrCREB5at17^scrRFX5_scrRFX5at27_1	226	252	131	627	909	549	299	315	440	510	1291	634	773	624	206	608	397	1046	609	524	375	648	280	803	534	1208	AAAGAGTGACATAAGTTTTCTGGGTATCAGAATTCTATCCCACTGAGTTTATTTTGAGAGAATGATGTAAGTTTTATTTTTAAAATTTCAGTCTTGAAAACATGACATTGGGCACGAAGTATGAATCACATCCTGCCT	FALSE	1.56452	1.41918	1.25915	0.813513	0.750759	0.816763	6.11649	4.79079	6.32277	1.30699	1.66502	1.59091	1.32823	1.48243	1.38295	0.71651	0.739777	0.637823	1.4118	1.19137	1.41401
inducible_.chr19:10856230_base_inducible_1	283	304	151	956	1534	798	529	567	895	982	2830	1455	2100	1015	360	900	564	1583	1053	915	762	1214	584	2023	1278	3391	AAAGAGTGACATAAGTTTTCTGGGTATCAGAATTCTATCCCACTGAGTTTATTTTGAGAGAATGATGTAAGTTTTATTTTTAAAATTTCAGTCTTGAAAATATGACATTGGACACGAAGTATGAATCACATCCTGCCT	FALSE	2.10843	2.0023	2.10298	0.900234	0.938835	0.966843	5.27118	4.56967	5.19462	0.92505	1.13529	1.0365	2.05718	2.18113	2.38664	0.895086	0.852046	0.81785	1.31353	1.26642	1.51796
inducibleMutant_.i1.-287540550_mm_chr19:10856230$scrCREB5_scrCREB5at31^CREB5_CREB5at-65^RFX5_RFX5at-56^CREB5_CREB5at-9^scrCREB5_scrCREB5at17^scrRFX5_scrRFX5at27_1	395	359	153	1260	1902	1138	610	645	896	940	2523	1259	1849	975	403	1151	740	1865	1183	1021	851	1558	624	1628	984	2528	AAAGAGTGACATAAGTTTTCTGGGTATCAGAATTCTATCCCACTGAGTTTATTTTGAGAGAATGATGTAAGTTTTATTTTTAAAATTTCAGTCTTGAAAATATGAGACTGGACACGAAGTATGAATCACATCCTGCCT	FALSE	1.95682	1.80365	1.92759	1.06609	0.978444	0.963461	6.02485	4.91355	6.42419	1.1197	1.16266	0.910769	1.72342	1.74827	1.85224	1.04064	1.13834	0.909718	1.61101	1.48113	1.7633
inducibleMutant_.i2.-493886327_mm_chr19:10856230$scrRFX5_scrRFX5at27^CREB5_CREB5at-65^RFX5_RFX5at-56^CREB5_CREB5at-9^scrCREB5_scrCREB5at17^scrCREB5_scrCREB5at31_1	371	390	215	1203	2082	1209	597	451	661	631	1782	852	1274	908	402	1022	783	1926	1295	997	604	1078	537	1277	683	1836	AAAGAGTGACATAAGTTTTCTGGGTATCAGAATTCTATCCCACTGAGTTTATTTTGAGAGAATGATGTAAGTTTTATTTTTAAAATTTCAGTCTTGAAATTATGACACTGGACACGAAGTATGAATCACATCCTGCCT	FALSE	1.48409	1.31065	1.42615	0.800441	0.775083	0.694471	5.87756	5.49568	6.97362	1.07457	1.29057	1.30771	1.4516	1.30302	1.44448	0.793098	0.845752	0.84065	1.78647	1.741	1.84891
inducibleMutant_.ip.705827940_mm_chr19:10856230$scrRFX5_scrRFX5at27^CREB5_CREB5at-65^RFX5_RFX5at-56^CREB5_CREB5at-9^scrCREB5_scrCREB5at17^scrCREB5_scrCREB5at31_1	871	797	411	1991	3599	1972	1133	1523	2255	2484	4853	2756	3510	1942	698	1960	1532	3891	3047	2676	2079	3636	1669	3673	2470	5705	AAAGAGTGACATAAGTTTTCTGGGTATCAGAATTCTATCCCACTGAGTTTATTTTGAGAGAATGATGTAAGTTTTATTTTTAAAATTTCAGTCTTGCCGAGAGTGATGCTCCCACGAAGTATGAATCACATCCTGCCT	FALSE	1.88973	1.98227	1.83713	1.26383	1.23632	1.27824	5.12563	5.00572	5.99354	1.3293	1.38969	1.31722	1.95215	2.20325	2.09861	1.27638	1.33378	1.22161	1.68747	1.9153	2.32029
inducibleMutant_.i1.-2024663615_mm_chr19:10856230$scrRFX5_scrRFX5at27^CREB5_CREB5at-65^RFX5_RFX5at-56^CREB5_CREB5at-9^scrCREB5_scrCREB5at17^scrCREB5_scrCREB5at31_1	454	493	231	1369	2352	1410	705	743	1179	1250	2933	1646	2232	1107	475	1299	856	2420	1723	1518	1059	1784	796	2301	1467	3337	AAAGAGTGACATAAGTTTTCTGGGTATCAGAATTCTATCCCACTGAGTTTATTTTGAGAGAATGATGTAAGTTTTATTTTTAAAATTTCAGTCTTGGAAATATGACATTGGACACGAAGTATGAATCACATCCTGCCT	FALSE	2.00356	2.07689	2.04941	1.08163	1.13396	1.12843	5.66396	5.2573	6.8871	1.11353	1.38149	1.18979	2.14541	2.29562	2.15345	1.14058	1.14804	1.0221	1.84116	1.89999	2.30903
inducibleMutant_.If.-1801762419_mm_chr19:10856230$scrRFX5_scrRFX5at27^CREB5_CREB5at-65^RFX5_RFX5at-56^CREB5_CREB5at-9^scrCREB5_scrCREB5at17^scrCREB5_scrCREB5at31_1	422	434	233	1472	2510	1465	616	561	1061	986	2862	1508	1960	920	409	1225	690	2663	1754	1707	832	1360	608	2013	1347	3156	AAAGAGTGACATAAGTTTTCTGGGTATCAGAATTCTATCCCACTGAGTTTATTTTGAGAGAATGATGTAAGTTTTATTTTTAAAATTTCAGTCTTGTTTTATACTGTAACCTCACGAAGTATGAATCACATCCTGCCT	FALSE	2.35245	2.28953	2.16546	0.982683	1.22789	1.07103	6.97	6.42107	8.18961	1.18458	1.39187	1.37348	2.25839	2.53628	2.45061	1.07823	1.05308	0.939382	2.43786	2.32732	3.12429
inducibleMutant_.If.983967954_mm_chr19:10856230$CREB5_CREB5at-9^CREB5_CREB5at-65^RFX5_RFX5at-56^scrCREB5_scrCREB5at17^scrRFX5_scrRFX5at27^scrCREB5_scrCREB5at31_1	58	80	30	168	289	138	158	201	358	359	699	362	466	328	62	286	107	211	139	126	340	456	218	410	252	781	AAAGAGTGACATAAGTTTTCTGGGTATCAGAATTCTATCCCACTGAGTTTATTTTGAGAGTTACTACATTCATTTATTTTTAAAATTTCAGTCTTGAAAATATGACATTGGACACGAAGTATGAATCACATCCTGCCT	FALSE	1.61154	1.54158	1.44409	0.987554	1.1621	1.09378	3.1014	2.88241	3.00766	0.634754	1.00028	0.689462	1.29019	1.33089	1.70099	1.23589	0.990379	0.944734	0.541793	0.517315	0.646848
inducibleMutant_.ip.389277195_mm_chr19:10856230$RFX5_RFX5at-56^CREB5_CREB5at-65^CREB5_CREB5at-9^scrCREB5_scrCREB5at17^scrRFX5_scrRFX5at27^scrCREB5_scrCREB5at31_1	505	714	336	1043	1316	985	239	483	716	817	1391	786	1133	310	181	511	334	1052	650	605	383	688	303	809	513	1147	AAAGAGTGACATACGTTGCCATGGCAACGGAATTCTATCCCACTGAGTTTATTTTGAGAGAATGATGTAAGTTTTATTTTTAAAATTTCAGTCTTGAAAATATGACATTGGACACGAAGTATGAATCACATCCTGCCT	FALSE	3.39315	3.54155	3.71493	2.51087	2.45914	2.63373	12.7289	8.67706	14.192	3.65366	5.90188	5.10491	2.69358	2.86664	2.64318	1.47303	1.58102	1.38934	2.85811	2.55956	3.28624
inducibleMutant_.If.-1190743397_mm_chr19:10856230$RFX5_RFX5at-56^CREB5_CREB5at-65^CREB5_CREB5at-9^scrCREB5_scrCREB5at17^scrRFX5_scrRFX5at27^scrCREB5_scrCREB5at31_1	172	237	72	547	687	574	263	279	339	419	844	657	820	479	172	378	354	932	622	522	277	608	239	689	423	1106	AAAGAGTGACATATCAAAAGACCCATAGTGAATTCTATCCCACTGAGTTTATTTTGAGAGAATGATGTAAGTTTTATTTTTAAAATTTCAGTCTTGAAAATATGACATTGGACACGAAGTATGAATCACATCCTGCCT	FALSE	1.33243	1.91585	1.74004	0.938658	0.753523	0.874157	6.06649	4.11638	7.51558	1.13086	1.78026	0.994084	1.48466	1.52975	1.64947	0.689477	0.904229	0.709233	1.63872	1.58515	1.83502
RFXrandMutant_.If.1111195260_mm_chr11:31330880$scrCREB5_scrCREB5at-58^RFX5_RFX5at-54^scrCREB5_scrCREB5at-24^scrCREB5_scrCREB5at35^scrRFX5_scrRFX5at51_1	3678	3663	1930	1697	3438	1424	4834	3396	4941	5528	5655	3237	4321	3869	3921	7375	5852	4332	2666	1882	3509	6227	3055	4257	2530	5877	AAAGGAAACTGATTTCAAGTGGTTAGTAACAGCTCAGTGTCAGCAGCCCGTGTGAGAACCACACTGCATTAGAGGTGCTGGCCAATCACGGGGCGCGGTTATATTCCCGTCTCATAGCAACCAAGAGATCTGCATGGC	FALSE	1.10528	1.16863	1.13519	1.41452	1.35972	1.42784	1.02395	1.12076	1.0144	1.31565	1.49699	1.44976	1.13566	1.13276	1.08513	1.08134	1.14654	1.12238	0.943006	0.841154	0.81908
RFXrandMutant_.If.1393815036_mm_chr11:31330880$RFX5_RFX5at-54^scrCREB5_scrCREB5at-58^scrCREB5_scrCREB5at-24^scrCREB5_scrCREB5at35^scrRFX5_scrRFX5at51_1	3543	3736	1712	1614	3725	1488	4375	2832	4027	4378	5029	2837	3771	3552	3537	7043	5532	4745	2678	1979	3265	5465	2843	3826	2301	5420	AAAGGAAACTGTAAACAAGTGGTATCATTGTGCTCAGTGTCAGCAGCCCGTGTGAGAACCACACTGCATTAGAGGTGCTGGCCAATCACGGGGCGCGGTTATATTCCCGTCTCATAGCAACCAAGAGATCTGCATGGC	FALSE	1.07065	1.11563	1.07911	1.28487	1.20709	1.23172	1.07605	1.34172	1.1712	1.40032	1.68701	1.42093	1.11177	1.12217	1.09006	1.09594	1.09604	1.13771	1.12509	0.920348	0.938163
RFXrandMutant_.i1.-2124988201_mm_chr11:31330880$scrCREB5_scrCREB5at-58^RFX5_RFX5at-54^scrCREB5_scrCREB5at-24^scrCREB5_scrCREB5at35^scrRFX5_scrRFX5at51_1	2110	2172	1204	1076	1681	775	2207	1408	2244	2076	2787	1450	1953	1666	1932	3624	2885	2098	1462	899	1568	2672	1400	1781	1070	2850	AAAGGAAACTGTAAAGGTCACCATAGTAACAGCTCAGTGTCAGCAGCCCGTGTGAGAACCACACTGCATTAGAGGTGCTGGCCAATCACGGGGCGCGGTTATATTCCCGTCTCATAGCAACCAAGAGATCTGCATGGC	FALSE	1.26503	1.2157	1.19154	1.36197	1.4341	1.24527	1.42205	1.20027	1.20922	1.65316	1.94423	1.98094	1.1034	1.11257	1.22207	1.12214	1.14254	1.19448	1.06061	1.07124	0.908636
RFXrandMutant_.i1.-691426213_mm_chr11:31330880$RFX5_RFX5at-54^scrCREB5_scrCREB5at-58^scrCREB5_scrCREB5at-24^scrCREB5_scrCREB5at35^scrRFX5_scrRFX5at51_1	1571	1511	735	597	1544	498	2107	1365	1916	1960	2259	1361	1600	1758	1319	2988	2274	1566	1156	686	1512	2663	1213	1650	946	2269	AAAGGAAACTGTAAAGTACACCATAGTAAGAGCTCAGTGTCAGCAGCCCGTGTGAGAACCACACTGCATTAGAGGTGCTGGCCAATCACGGGGCGCGGTTATATTCCCGTCTCATAGCAACCAAGAGATCTGCATGGC	FALSE	0.971707	1.08136	0.925088	1.25127	1.1604	1.11416	0.826448	1.15478	0.8139	1.28928	1.41674	1.26669	0.96874	0.932157	0.922022	1.02544	1.0791	0.980773	0.750236	0.8027	0.657068
RFXrandMutant_.If.-1059752110_mm_chr11:31330880$scrCREB5_scrCREB5at-24^scrCREB5_scrCREB5at-58^RFX5_RFX5at-54^scrCREB5_scrCREB5at35^scrRFX5_scrRFX5at51_1	3213	3292	1614	1408	2679	1287	4233	1916	3027	3270	3991	2113	2889	2871	3057	5937	4466	3214	1957	1320	2478	4235	1934	3034	1665	4420	AAAGGAAACTGTAAAGTTCACCATAGTAACAGCTCAGTGTCAGCACGGGCACACTCTACCACACTGCATTAGAGGTGCTGGCCAATCACGGGGCGCGGTTATATTCCCGTCTCATAGCAACCAAGAGATCTGCATGGC	FALSE	1.0512	1.02801	1.02281	1.07548	1.12257	1.13822	0.970197	0.997331	1.04698	1.31249	1.53639	1.38453	1.09075	1.00461	1.0998	1.02907	1.05083	0.957525	0.942839	0.832093	0.774187
RFXrandMutant_.i1.1218297736_mm_chr11:31330880$scrCREB5_scrCREB5at-24^scrCREB5_scrCREB5at-58^RFX5_RFX5at-54^scrCREB5_scrCREB5at35^scrRFX5_scrRFX5at51_1	2212	2300	1071	1044	1715	791	3159	1450	2156	2310	2673	1520	1991	2185	1866	4026	2787	2289	1381	897	1901	2962	1375	2181	1232	2814	AAAGGAAACTGTAAAGTTCACCATAGTAACAGCTCAGTGTCAGCAGCCCGGGCGAGAACCACACTGCATTAGAGGTGCTGGCCAATCACGGGGCGCGGTTATATTCCCGTCTCATAGCAACCAAGAGATCTGCATGGC	FALSE	0.925094	0.971682	0.926194	1.06944	1.05058	1.0565	0.963954	0.855518	0.86225	1.21079	1.43836	1.23108	1.03026	0.976734	0.920022	1.0373	0.965704	0.894495	0.882306	0.771536	0.691268
RFXrandMutant_.If.-595207280_mm_chr11:31330880$scrCREB5_scrCREB5at35^scrCREB5_scrCREB5at-58^RFX5_RFX5at-54^scrCREB5_scrCREB5at-24^scrRFX5_scrRFX5at51_1	1556	1577	721	755	1545	744	2521	1290	1921	1977	3019	1455	1971	2276	1673	3693	2674	2059	1271	1016	1653	2857	1491	2040	1229	2643	AAAGGAAACTGTAAAGTTCACCATAGTAACAGCTCAGTGTCAGCAGCCCGTGTGAGAACCACACTGCATTAGAGGTGCTGGCCAATCACGGGGCGCGGTTATATAGGGCAGAGTATGCAACCAAGAGATCTGCATGGC	FALSE	1.00306	0.892941	0.88023	0.91339	0.898644	0.868051	0.873534	0.965762	1.01626	1.06726	1.2358	1.03851	0.925125	0.935398	0.829565	0.865917	0.894228	0.931177	0.761919	0.681691	0.751669
RFXrandMutant_.i1.-8217076_mm_chr11:31330880$scrCREB5_scrCREB5at35^scrCREB5_scrCREB5at-58^RFX5_RFX5at-54^scrCREB5_scrCREB5at-24^scrRFX5_scrRFX5at51_1	675	812	351	419	687	348	1321	864	1176	1226	1958	976	1229	1203	924	1886	1304	1277	795	580	1157	1801	861	1345	697	1783	AAAGGAAACTGTAAAGTTCACCATAGTAACAGCTCAGTGTCAGCAGCCCGTGTGAGAACCACACTGCATTAGAGGTGCTGGCCAATCACGGGGCGCGGTTATATTCCCGGCCCATAGCAACCAAGAGATCTGCATGGC	FALSE	1.23079	1.13323	1.03841	1.15741	1.04082	1.01844	0.92516	0.819537	0.907157	0.883558	1.21435	0.96483	1.15398	1.00365	1.05879	1.14668	1.06649	1.01734	0.894026	0.806707	0.811835
putativeConstitWgoodRFXsite_.chr11:31330880_base_RFX25_great_tiles_from_constitK27_CBP_peaks_1	1924	2080	978	942	1637	625	2557	1346	1988	2129	2355	1387	1783	1710	1707	3362	2683	1863	1492	931	1723	2409	1462	1797	1010	2550	AAAGGAAACTGTAAAGTTCACCATAGTAACAGCTCAGTGTCAGCAGCCCGTGTGAGAACCACACTGCATTAGAGGTGCTGGCCAATCACGGGGCGCGGTTATATTCCCGTCTCATAGCAACCAAGAGATCTGCATGGC	FALSE	1.04144	1.13295	1.05983	1.26849	1.23781	1.2442	1.07455	1.00886	0.841697	1.30109	1.60702	1.38885	1.08466	1.02316	1.06529	1.20134	1.00358	1.21528	0.917575	1.06509	0.916767
RFXrandMutant_.i1.1132759385_mm_chr11:31330880$scrRFX5_scrRFX5at51^scrCREB5_scrCREB5at-58^RFX5_RFX5at-54^scrCREB5_scrCREB5at-24^scrCREB5_scrCREB5at35_1	7275	7472	3296	3707	7574	3073	12740	5723	8803	9425	12121	6610	8711	8712	8438	17994	12975	10758	6796	4741	7520	12270	6532	8717	5435	12141	AAAGGAAACTGTAAAGTTCACCATAGTAACAGCTCAGTGTCAGCAGCCCGTGTGAGAACCACACTGCATTAGAGGTGCTGGCCAATCACGGGGCGCGGTTATATTCCCGTCTCATAGCAAGCAAGAGATCAGCATGGC	FALSE	1.0521	1.05978	1.01632	1.05863	1.07583	1.08112	0.848709	0.936851	0.830614	0.987411	1.15866	0.93943	1.03274	1.08068	0.995548	1.02914	1.00331	1.06575	1.04001	0.952247	0.916342
inducibleMutant_.If.353419355_mm_chr19:10856230$CREB5_CREB5at-65^RFX5_RFX5at-56^CREB5_CREB5at-9^scrCREB5_scrCREB5at17^scrRFX5_scrRFX5at27^scrCREB5_scrCREB5at31_1	480	489	212	1316	2156	1270	682	688	1064	1234	2743	1454	2057	1119	439	1231	638	2425	1360	1333	975	1558	825	2173	1301	3138	AAAGTCACTGTATTCATTTCTGGGTATCAGAATTCTATCCCACTGAGTTTATTTTGAGAGAATGATGTAAGTTTTATTTTTAAAATTTCAGTCTTGAAAATATGACATTGGACACGAAGTATGAATCACATCCTGCCT	FALSE	1.85368	1.81496	1.86847	0.990825	1.01238	1.10204	5.6283	4.98172	6.41247	1.217	1.41649	1.12875	2.00434	2.01402	2.00331	1.03884	0.991854	1.04797	1.82518	1.48362	2.00588
activeMutant_.ip.-128102105_mm_chr18:37803885$CREB5_CREB5at-37^CREB5_CREB5at49_1	516	474	335	338	705	407	488	2214	3632	3824	2514	1227	1741	284	442	1044	1093	920	607	469	3092	5459	3311	1787	1126	2359	AAAGTGCTCCGTCAGAGCGGAAGCAGACGCGGAATGACGTCACCGACCGGAAGCAGACACGGAGGGGCTGGCCGCCGCTCTTCCGGAAGTACTAGCGGCGCGCGCAGGCGCACTTCGTAATTACGTCGTTCCGTGACT	FALSE	6.69399	6.03474	6.23107	12.5631	13.6163	13.4558	2.02024	2.27659	2.87198	1.82837	1.91888	2.49271	6.49454	6.86811	5.93383	12.9807	13.6932	16.5717	2.72831	2.60906	2.78074
activeMutant_.i1.338055068_mm_chr18:37803885$CREB5_CREB5at-37^CREB5_CREB5at49_1	1491	825	1100	747	1392	745	1495	3334	4998	5932	2592	1606	2190	705	1575	1721	3227	1750	1436	948	5191	8342	4578	1990	1197	3282	AAAGTGCTCCGTCAGAGCGGAAGCAGACGCGGCGCTACGGCCCAGACCGGAAGCAGACACGGAGGGGCTGGCCGCCGCTCTTCCGGAAGTACTAGCGGCGCGCGCAGGCGCACTTCGTAATTACGTCGTTCCGTGACT	FALSE	2.78025	3.18192	3.15745	7.62106	7.54813	8.40858	1.45742	1.46728	1.71602	1.72453	1.09019	2.67176	2.91344	2.94118	3.32564	8.77885	8.4293	9.23025	2.09061	2.48645	2.26425
activeMutant_.i2.199752850_mm_chr18:37803885$CREB5_CREB5at49^CREB5_CREB5at-37_1	1338	997	883	665	1174	593	1245	2352	3413	3583	1721	1019	1349	343	1324	2429	2474	1710	1290	761	3324	5529	3257	1460	934	1974	AAAGTGCTCCGTCAGAGCGGAAGCAGACGCGGCGCTACGTCACAGACCGGAAGCAGACACGGAGGGGCTGGCCGCCGCTCTTCCGGAAGTACTAGCGGCGCGCGCAGGCGCACTTCGTAAGTCCGTCGTTCCGTGACT	FALSE	3.79424	4.14966	3.9976	11.0505	10.5944	10.4391	1.55797	1.48598	1.64018	1.85832	1.58203	2.57536	4.3934	4.71704	4.1113	11.5543	11.4832	13.4974	4.19882	4.59103	3.73591
activeMutant_.ip.-1664851020_mm_chr18:37803885$CREB5_CREB5at49^CREB5_CREB5at-37_1	3961	3508	2753	3182	4927	3124	3824	11289	17477	19839	11369	6436	9361	2070	4603	8235	8932	6027	5124	3871	17217	26340	15692	8452	5149	13526	AAAGTGCTCCGTCAGAGCGGAAGCAGACGCGGCGCTACGTCACAGACCGGAAGCAGACACGGAGGGGCTGGCCGCCGCTCTTCCGGAAGTACTAGCGGCGCGCGCAGGCGCACTTCGTAATGACGTCACCCCGTGACT	FALSE	4.15327	4.34288	4.59657	8.78868	8.98937	9.57768	2.4271	2.03039	2.81319	1.79111	1.81231	2.61418	4.21436	4.30893	4.66793	9.9166	9.06475	10.7754	2.4522	3.02171	3.1489
activeMutant_.i1.-739074858_mm_chr18:37803885$CREB5_CREB5at49^CREB5_CREB5at-37_1	3166	2786	2093	1412	2986	1968	3070	10293	14974	16986	7501	4316	5878	1752	2798	6405	6860	3480	2686	2165	16556	25344	13743	5648	3904	8579	AAAGTGCTCCGTCAGAGCGGAAGCAGACGCGGCGCTACGTCACAGACCGGAAGCAGACACGGAGGGGCTGGCCGCCGCTCTTCCGGAAGTACTAGCGGCGCGCGCAGGCGCACTTCGTAATTACGGCCTTCCGTGACT	FALSE	3.2376	3.44096	3.41018	9.46774	9.09989	9.68875	1.34153	1.53273	2.20746	1.78323	1.7928	2.47558	3.32738	3.86005	3.49807	11.2667	10.3051	11.15	1.6729	1.87148	2.08079
active_.chr18:37803885_base_active_1	4685	3975	3144	2734	4163	2757	4620	12466	18983	21770	12792	7018	10672	2181	5052	9349	9122	6159	5001	3064	19689	31109	17783	9519	6219	14321	AAAGTGCTCCGTCAGAGCGGAAGCAGACGCGGCGCTACGTCACAGACCGGAAGCAGACACGGAGGGGCTGGCCGCCGCTCTTCCGGAAGTACTAGCGGCGCGCGCAGGCGCACTTCGTAATTACGTCGTTCCGTGACT	FALSE	4.43528	4.49459	4.97361	9.21107	9.26705	9.97501	1.72608	1.41997	2.05495	1.75348	1.69975	2.47108	4.50483	4.93949	4.69076	10.7633	10.1611	11.5898	2.37837	2.79908	2.36558
activeMutant_.If.-1205712127_mm_chr18:37803885$CREB5_CREB5at49^CREB5_CREB5at-37_1	9945	9038	6399	4749	7444	4846	8628	31174	47139	53732	25808	14632	19212	5142	9758	18457	19638	11537	8219	6171	48909	76957	43494	19379	12921	28906	AAAGTGCTCCGTCAGAGCGGAAGCAGACGCGGCGCTACGTCACAGACCGGAAGCAGACACGGAGGGGCTGGCCGCCGCTCTTCCGGAAGTACTAGCGGCGCGCGCAGGCGCACTTCGTTTAATGCAGCAACCGTGACT	FALSE	3.79543	3.97469	3.79772	9.7701	9.7607	10.4427	1.60545	1.3596	1.9341	1.9931	2.06944	2.69308	3.88993	4.35292	4.01589	11.3405	10.6617	12.0233	1.88967	1.9512	2.02083
activeMutant_.i2.2055661857_mm_chr18:37803885$CREB5_CREB5at-37^CREB5_CREB5at49_1	1224	861	819	658	1238	698	1233	3881	5813	6650	3455	1867	2542	536	1068	1761	2479	1637	1026	852	6095	9138	5245	2533	1686	3571	AAAGTGCTCCGTCAGAGCGGAAGCAGACGCGGCGGTCCGTCACAGACCGGAAGCAGACACGGAGGGGCTGGCCGCCGCTCTTCCGGAAGTACTAGCGGCGCGCGCAGGCGCACTTCGTAATTACGTCGTTCCGTGACT	FALSE	4.8744	4.86532	4.82051	11.6686	11.547	12.3985	1.55657	1.58224	1.94939	1.71654	1.37953	2.41194	4.87767	5.44891	4.75938	13.5577	12.145	13.9094	2.57222	2.33667	2.67658
activeMutant_.If.-797083544_mm_chr18:37803885$CREB5_CREB5at-37^CREB5_CREB5at49_1	4176	3678	2764	1884	3422	2052	3712	11587	17658	19979	8758	4786	6708	2334	4344	8335	8431	4352	3328	2885	17183	27026	15829	6333	3928	9369	AAAGTGCTCCGTCAGAGCGGAAGCAGACGCGGGCGATGCAGTGTGACCGGAAGCAGACACGGAGGGGCTGGCCGCCGCTCTTCCGGAAGTACTAGCGGCGCGCGCAGGCGCACTTCGTAATTACGTCGTTCCGTGACT	FALSE	2.83754	2.8642	2.92129	8.00035	8.05514	8.55428	1.4804	1.45274	1.9036	1.9453	1.95746	2.70381	2.8006	2.91533	2.8676	8.77756	8.24881	9.64005	1.57041	1.74059	2.08137
RFXrandMutant_.If.-782234278_mm_chr11:33371030$RFX5_RFX5at-13^scrCREB5_scrCREB5at21^scrRFX5_scrRFX5at45_1	224	198	111	160	228	91	563	475	676	768	1052	522	704	965	205	631	270	245	202	148	635	1263	576	688	418	1107	AACAACTGATAAACAAACCAAAAGCACTGTGAGGCTTATTTCTAAATTATTCCGATACAAAAGTTTCGCTTTTGTGCAGATTGTAGCTCGAGCAGAGTAGAACCCCCATGCTTTTCAAGAACAACGTTTCCGCCATCT	FALSE	0.824378	0.755571	0.741528	0.793241	0.745851	0.795325	0.828929	0.638177	0.556595	0.687977	0.694779	0.715914	0.735874	0.750353	0.819494	0.784553	0.932366	0.848441	0.213827	0.255528	0.25825
RFXrandMutant_.i1.-665526038_mm_chr11:33371030$RFX5_RFX5at-13^scrCREB5_scrCREB5at21^scrRFX5_scrRFX5at45_1	180	165	83	56	211	50	271	214	358	364	508	314	420	361	155	457	308	280	133	97	291	520	320	418	241	626	AACAACTGATAAACAAACCAAAAGCACTGTGAGGCTTATTTCTAAATTATTCCGATTGATTTCAAAGCGAGATGTGCAGATTGTAGCTCGAGCAGAGTAGAACCCCCATGCTTTTCAAGAACAACGTTTCCGCCATCT	FALSE	1.06413	1.21494	1.18256	0.955312	1.05586	1.00764	0.602732	1.22695	0.635341	1.14852	1.20283	1.11213	1.19512	1.15645	1.23878	0.961084	1.02614	1.26	0.653244	0.449737	0.452449
inactive_.chr12:57845975_base_inactive_1	2065	1986	972	1513	2653	965	6094	4919	7319	8341	10631	5701	8133	8221	2483	4366	3923	3320	2332	1674	7039	11095	5674	7843	4842	11580	AACCCCCGACCCCCTATCGCTGTCCGAACCCCCACCCATTCCTTCATCTTCTTCACCCTCACCAATAGAACGAGTTTACTCTTTTCGGACTTCGGGTCCTCTCCATCCTCGATCCTTCGAGATCTTCTTAATGTTTTC	TRUE	0.977885	0.968631	1.00556	0.964253	0.947894	1.01392	0.724173	0.68604	0.545294	0.585938	0.643823	0.579176	0.984691	1.02027	1.00626	1.02085	0.96142	0.98105	0.340125	0.346273	0.342875
activeMutant_.ip.746636643_mm_chr16:9281235$scrRFX5_scrRFX5at-63^scrRFX5_scrRFX5at-49^RFX5_RFX5at-26^scrCREB5_scrCREB5at-23^CREB5_CREB5at10^RFX5_RFX5at12^RFX5_RFX5at34_1	3459	3749	1877	1594	3112	1573	2269	1223	2004	2082	2308	1302	1691	1346	2019	4910	3532	2597	1693	1177	1219	2262	1016	1329	800	2122	AACTGACCGAGAGTGATGCTCCCATAGTGACGCACCAGCAGGTGGTTACCATGGAATGAGACAGCAGCAAAGCACTGTCCCTGTCGTCATGGAGCCCCTGAGCCATCTCCTAAGCAACCTGGCAGGAGATCCCCAAAC	FALSE	1.29667	1.35113	1.27697	1.46427	1.5852	1.54578	2.04908	2.16132	2.38726	2.63603	3.26416	3.00384	1.01911	1.02958	1.12623	1.07978	1.19718	1.07294	1.62499	1.53542	1.47244
activeMutant_.If.284489888_mm_chr16:9281235$scrRFX5_scrRFX5at-63^scrRFX5_scrRFX5at-49^RFX5_RFX5at-26^scrCREB5_scrCREB5at-23^CREB5_CREB5at10^RFX5_RFX5at12^RFX5_RFX5at34_1	2712	2949	1403	2640	5055	2944	2864	1518	2072	2465	3641	1878	2850	1948	2247	4515	3313	3028	2039	1446	1623	2875	1452	2151	1281	3540	AACTGACGTCGTGGCAAACGGACATAGTGACGCACCAGCAGGTGGTTACCATGGAATGAGACAGCAGCAAAGCACTGTCCCTGTCGTCATGGAGCCCCTGAGCCATCTCCTAAGCAACCTGGCAGGAGATCCCCAAAC	FALSE	1.41342	1.3466	1.48709	1.2558	1.13249	1.26456	2.68866	2.7814	3.53974	1.63739	2.03419	1.77882	1.13971	1.13914	1.29819	0.993357	1.05138	1.05951	1.30916	1.27774	1.24993
activeMutant_.i1.-660419727_mm_chr16:9281235$scrRFX5_scrRFX5at-63^scrRFX5_scrRFX5at-49^RFX5_RFX5at-26^scrCREB5_scrCREB5at-23^CREB5_CREB5at10^RFX5_RFX5at12^RFX5_RFX5at34_1	653	737	411	460	902	404	466	329	517	614	652	346	443	359	256	822	559	620	418	406	305	505	270	314	184	518	AACTGAGCAGCACCGTATGCCTCATAGTGACGCACCAGCAGGTGGTTACCATGGAATGAGACAGCAGCAAAGCACTGTCCCTGTCGTCATGGAGCCCCTGAGCCATCTCCTAAGCAACCTGGCAGGAGATCCCCAAAC	FALSE	1.37338	1.34621	1.25427	1.47686	1.53331	1.70917	2.87924	3.05025	2.98539	2.42305	3.12443	3.2026	0.902771	0.887851	1.03077	1.01293	1.00209	1.06905	1.45453	1.42133	1.90431
activeMutant_.ip.1680681848_mm_chr16:9281235$scrRFX5_scrRFX5at-49^scrRFX5_scrRFX5at-63^RFX5_RFX5at-26^scrCREB5_scrCREB5at-23^CREB5_CREB5at10^RFX5_RFX5at12^RFX5_RFX5at34_1	1786	1742	1026	745	1479	751	2205	1190	1752	1864	2074	1162	1567	1463	1395	3110	2529	1808	1174	807	1530	2221	1102	1651	803	2081	AACTGAGCAGCACCGTTTGCCCGAGAGTGATGCTCCAGCAGGTGGTTACCATGGAATGAGACAGCAGCAAAGCACTGTCCCTGTCGTCATGGAGCCCCTGAGCCATCTCCTAAGCAACCTGGCAGGAGATCCCCAAAC	FALSE	1.07202	1.10941	1.0887	1.31081	1.27504	1.27325	0.985492	1.057	1.17284	1.40058	1.56074	1.68961	1.16478	0.950798	1.01614	1.24687	1.08147	1.07069	1.04083	0.979576	0.928826
activeMutant_.ip.-1641826841_mm_chr16:9281235$RFX5_RFX5at-26^scrRFX5_scrRFX5at-63^scrRFX5_scrRFX5at-49^scrCREB5_scrCREB5at-23^CREB5_CREB5at10^RFX5_RFX5at12^RFX5_RFX5at34_1	891	1058	569	391	735	448	454	216	419	433	571	328	423	222	413	779	492	431	297	296	217	411	181	340	159	468	AACTGAGCAGCACCGTTTGCCTCATAGTGACGCACCAGCAGGTCGTTGCCATGGCAACGGACAGCAGCAAAGCACTGTCCCTGTCGTCATGGAGCCCCTGAGCCATCTCCTAAGCAACCTGGCAGGAGATCCCCAAAC	FALSE	1.94501	2.06373	1.93673	1.56798	2.00953	1.94915	2.51204	2.55121	3.39804	3.39357	4.60383	4.55096	1.58077	1.24068	1.50598	1.16542	1.31886	1.15892	1.63512	1.63312	2.24514
activeMutant_.i2.-1868968894_mm_chr16:9281235$RFX5_RFX5at-26^scrRFX5_scrRFX5at-63^scrRFX5_scrRFX5at-49^scrCREB5_scrCREB5at-23^CREB5_CREB5at10^RFX5_RFX5at12^RFX5_RFX5at34_1	1797	1884	938	1698	3459	2041	2585	1296	1632	1972	2606	1361	1963	1361	1841	4541	2844	2751	1815	1349	1663	2771	1258	1629	1050	2416	AACTGAGCAGCACCGTTTGCCTCATAGTGACGCACCAGCAGGTGCTTACCATGGAATGAGACAGCAGCAAAGCACTGTCCCTGTCGTCATGGAGCCCCTGAGCCATCTCCTAAGCAACCTGGCAGGAGATCCCCAAAC	FALSE	1.44795	1.39679	1.46603	1.53457	1.27672	1.44797	1.91594	2.10865	2.71887	1.20205	1.43983	1.31762	1.23539	1.33644	1.26813	1.45683	1.4504	1.31386	1.70238	1.62792	1.66901
activeMutant_.i1.-1008550613_mm_chr16:9281235$RFX5_RFX5at-26^scrRFX5_scrRFX5at-63^scrRFX5_scrRFX5at-49^scrCREB5_scrCREB5at-23^CREB5_CREB5at10^RFX5_RFX5at12^RFX5_RFX5at34_1	1924	1847	940	1627	3033	1506	2444	1010	1504	1446	2071	1152	1546	1223	1805	4171	2867	2296	1538	1020	1211	1931	1046	1414	798	2088	AACTGAGCAGCACCGTTTGCCTCATAGTGACGCACCAGCAGGTGGATACCATGGAATGAGACAGCAGCAAAGCACTGTCCCTGTCGTCATGGAGCCCCTGAGCCATCTCCTAAGCAACCTGGCAGGAGATCCCCAAAC	FALSE	1.28054	1.3157	1.28489	1.33086	1.30934	1.18155	1.94174	1.95563	2.12192	1.36125	1.49299	1.3966	1.19334	1.1303	1.21963	1.18057	1.12478	1.21572	1.58114	1.53513	1.40436
activeMutant_.ip.846372333_mm_chr16:9281235$scrCREB5_scrCREB5at-23^scrRFX5_scrRFX5at-63^scrRFX5_scrRFX5at-49^RFX5_RFX5at-26^CREB5_CREB5at10^RFX5_RFX5at12^RFX5_RFX5at34_1	185	225	63	102	134	50	231	181	306	379	401	198	274	227	178	507	215	169	142	104	293	513	243	240	126	390	AACTGAGCAGCACCGTTTGCCTCATAGTGACGCACCAGCAGGTGGTAACCCTCAAGGTAGACAGCAGCAAAGCACTGTCCCTGTCGTCATGGAGCCCCTGAGCCATCTCCTAAGCAACCTGGCAGGAGATCCCCAAAC	FALSE	1.33585	1.21835	1.22689	1.28497	1.43525	1.66849	1.28793	0.914129	0.745357	1.38482	1.92425	0.990319	1.09126	0.961527	1.22734	1.53893	1.60991	1.52162	0.627026	0.763619	0.771459
activeMutant_.i2.-569698961_mm_chr16:9281235$scrCREB5_scrCREB5at-23^scrRFX5_scrRFX5at-63^scrRFX5_scrRFX5at-49^RFX5_RFX5at-26^CREB5_CREB5at10^RFX5_RFX5at12^RFX5_RFX5at34_1	2226	2600	1128	1936	3316	1904	3030	1015	1544	1714	2765	1464	1768	1452	2300	5071	3710	3078	2022	1260	1358	2257	1103	1719	1070	2619	AACTGAGCAGCACCGTTTGCCTCATAGTGACGCACCAGCAGGTGGTCACCATGGAATGAGACAGCAGCAAAGCACTGTCCCTGTCGTCATGGAGCCCCTGAGCCATCTCCTAAGCAACCTGGCAGGAGATCCCCAAAC	FALSE	1.44001	1.40834	1.23765	1.12652	1.13217	1.17965	1.86367	1.72459	2.16387	1.27033	1.6952	1.3518	1.22194	1.27654	1.28853	1.11509	1.10733	1.07978	1.78536	1.69992	1.4612
activeMutant_.i1.1393362029_mm_chr16:9281235$scrCREB5_scrCREB5at-23^scrRFX5_scrRFX5at-63^scrRFX5_scrRFX5at-49^RFX5_RFX5at-26^CREB5_CREB5at10^RFX5_RFX5at12^RFX5_RFX5at34_1	1473	1748	825	1324	2094	1222	1313	421	734	709	1209	605	914	691	914	2467	1607	1819	1101	884	520	947	416	619	355	1117	AACTGAGCAGCACCGTTTGCCTCATAGTGACGCACCAGCAGGTGGTTACCAGGCAATGAGACAGCAGCAAAGCACTGTCCCTGTCGTCATGGAGCCCCTGAGCCATCTCCTAAGCAACCTGGCAGGAGATCCCCAAAC	FALSE	1.32308	1.22295	1.34447	0.981844	1.13097	1.02537	2.94123	2.5132	3.20489	1.93987	2.63007	2.28158	0.924602	0.889953	1.15478	0.897224	0.976298	0.85574	2.21707	1.94502	2.15417
activeMutant_.ip.-1547387490_mm_chr16:9281235$CREB5_CREB5at10^scrRFX5_scrRFX5at-63^scrRFX5_scrRFX5at-49^RFX5_RFX5at-26^scrCREB5_scrCREB5at-23^RFX5_RFX5at12^RFX5_RFX5at34_1	303	403	161	527	883	510	409	181	310	427	764	344	500	287	406	743	467	782	485	483	278	392	221	354	204	601	AACTGAGCAGCACCGTTTGCCTCATAGTGACGCACCAGCAGGTGGTTACCATGGAATGAGACAGCAGCAAAGCACTGTCAATGACGTCACCGAGCCCCTGAGCCATCTCCTAAGCAACCTGGCAGGAGATCCCCAAAC	FALSE	2.01303	1.67421	1.7708	1.01633	1.15004	1.48681	3.75831	3.40214	4.29391	1.28101	1.94658	1.42938	1.2731	1.2313	1.49595	1.15488	0.973004	1.09455	2.29483	2.06288	2.83381
activeMutant_.If.487914058_mm_chr16:9281235$RFX5_RFX5at12^scrRFX5_scrRFX5at-63^scrRFX5_scrRFX5at-49^RFX5_RFX5at-26^scrCREB5_scrCREB5at-23^CREB5_CREB5at10^RFX5_RFX5at34_1	2078	2001	1002	1689	2726	1520	3284	1239	1828	1925	2767	1488	1960	1864	2249	5230	3510	3330	1888	1436	1787	2709	1331	1968	1204	2817	AACTGAGCAGCACCGTTTGCCTCATAGTGACGCACCAGCAGGTGGTTACCATGGAATGAGACAGCAGCAAAGCACTGTCCCACAGCAGTACCTCGGGCTGAGCCATCTCCTAAGCAACCTGGCAGGAGATCCCCAAAC	FALSE	1.12254	1.11504	1.06879	1.07118	1.04415	1.03204	1.50014	1.30809	1.59385	1.09415	1.20374	1.10793	1.08974	1.11892	1.07961	1.14302	1.03532	1.01498	1.50461	1.23643	1.29722
activeMutant_.ip.1813886947_mm_chr16:9281235$RFX5_RFX5at12^scrRFX5_scrRFX5at-63^scrRFX5_scrRFX5at-49^RFX5_RFX5at-26^scrCREB5_scrCREB5at-23^CREB5_CREB5at10^RFX5_RFX5at34_1	2457	3075	1666	1284	2191	1389	775	557	1068	1120	1086	647	915	580	791	2063	1428	1120	632	618	713	956	550	521	423	950	AACTGAGCAGCACCGTTTGCCTCATAGTGACGCACCAGCAGGTGGTTACCATGGAATGAGACAGCAGCAAAGCACTGTCCCCGTTGCCATGGCAACGCTGAGCCATCTCCTAAGCAACCTGGCAGGAGATCCCCAAAC	FALSE	1.41592	1.55815	1.60352	1.54763	1.96054	1.92975	4.83247	4.45508	6.17173	5.48198	7.83851	7.80584	0.927154	1.26337	1.1701	1.46567	1.17419	1.34791	1.62635	1.33016	1.79418
activeMutant_.i2.679246944_mm_chr16:9281235$CREB5_CREB5at10^scrRFX5_scrRFX5at-63^scrRFX5_scrRFX5at-49^RFX5_RFX5at-26^scrCREB5_scrCREB5at-23^RFX5_RFX5at12^RFX5_RFX5at34_1	1043	1039	512	776	1488	776	2131	604	907	973	1286	721	892	1377	1191	2585	1404	1720	1060	792	917	1410	571	943	557	1374	AACTGAGCAGCACCGTTTGCCTCATAGTGACGCACCAGCAGGTGGTTACCATGGAATGAGACAGCAGCAAAGCACTGTCCCGGCCGTCATGGAGCCCCTGAGCCATCTCCTAAGCAACCTGGCAGGAGATCCCCAAAC	FALSE	0.706228	0.731364	0.658435	0.706873	0.701303	0.706138	1.06215	1.10036	1.25396	0.846321	0.963212	0.872435	0.706838	0.70071	0.712818	0.793983	0.72945	0.589425	1.05201	0.939693	0.968493
activeMutant_.i2.-1133228399_mm_chr16:9281235$RFX5_RFX5at12^scrRFX5_scrRFX5at-63^scrRFX5_scrRFX5at-49^RFX5_RFX5at-26^scrCREB5_scrCREB5at-23^CREB5_CREB5at10^RFX5_RFX5at34_1	242	252	139	344	662	336	451	149	226	222	426	184	258	285	447	803	457	505	331	179	242	280	153	222	152	366	AACTGAGCAGCACCGTTTGCCTCATAGTGACGCACCAGCAGGTGGTTACCATGGAATGAGACAGCAGCAAAGCACTGTCCCTCTCGTCATGGAGTCCCTGAGCCATCTCCTAAGCAACCTGGCAGGAGATCCCCAAAC	FALSE	1.13032	0.901789	0.920146	0.84252	0.844299	0.778429	2.22478	2.31311	2.56548	0.92784	1.10386	1.11914	0.80399	0.92388	0.917407	1.01239	0.69988	0.763086	1.49235	1.41774	1.05758
activeMutant_.i1.1398669807_mm_chr16:9281235$RFX5_RFX5at12^scrRFX5_scrRFX5at-63^scrRFX5_scrRFX5at-49^RFX5_RFX5at-26^scrCREB5_scrCREB5at-23^CREB5_CREB5at10^RFX5_RFX5at34_1	167	224	128	533	797	437	301	114	177	171	367	222	360	209	143	389	363	608	455	417	129	159	109	302	157	405	AACTGAGCAGCACCGTTTGCCTCATAGTGACGCACCAGCAGGTGGTTACCATGGAATGAGACAGCAGCAAAGCACTGTCCCTGACGTCATGGAGCGCCTGAGCCATCTCCTAAGCAACCTGGCAGGAGATCCCCAAAC	FALSE	1.32788	1.48368	1.75081	0.879017	0.901695	0.817637	5.16495	4.1726	4.99944	0.959366	1.47018	1.54415	1.49143	1.30128	1.38431	0.735901	0.541952	0.741322	2.45009	2.65754	3.35966
activeMutant_.i1.1592660009_mm_chr16:9281235$CREB5_CREB5at10^scrRFX5_scrRFX5at-63^scrRFX5_scrRFX5at-49^RFX5_RFX5at-26^scrCREB5_scrCREB5at-23^RFX5_RFX5at12^RFX5_RFX5at34_1	1795	2204	918	1276	2380	1316	3171	957	1626	1635	2370	1242	1655	1599	2227	4596	3816	2889	1893	1362	1412	2470	1289	1584	982	2338	AACTGAGCAGCACCGTTTGCCTCATAGTGACGCACCAGCAGGTGGTTACCATGGAATGAGACAGCAGCAAAGCACTGTCCCTGTCGGCCTGGAGCCCCTGAGCCATCTCCTAAGCAACCTGGCAGGAGATCCCCAAAC	FALSE	1.12083	1.08494	1.05204	0.9645	1.08269	1.02183	1.17371	1.18276	1.42911	0.978819	1.37311	1.05122	1.02247	1.06385	1.04453	1.05284	1.10042	1.14586	1.52168	1.44516	1.43428
activeMutant_.i1.-1426359121_mm_chr16:9281235$RFX5_RFX5at34^scrRFX5_scrRFX5at-63^scrRFX5_scrRFX5at-49^RFX5_RFX5at-26^scrCREB5_scrCREB5at-23^CREB5_CREB5at10^RFX5_RFX5at12_1	500	477	217	856	1042	576	831	465	755	694	1060	589	745	449	433	1226	823	933	558	463	601	1004	548	638	438	916	AACTGAGCAGCACCGTTTGCCTCATAGTGACGCACCAGCAGGTGGTTACCATGGAATGAGACAGCAGCAAAGCACTGTCCCTGTCGTCATGGAGCCCCTGAGCCAACTCCTAAGCAAGCTGGCAGGAGATCCCCAAAC	FALSE	1.78524	1.83232	1.68652	1.66896	1.79033	1.54463	3.00454	1.97597	2.38686	1.04041	1.13398	0.948211	1.46662	1.68984	1.45739	1.59589	1.59293	1.73485	1.75009	1.51706	1.73636
active_.chr16:9281235_base_active_1	341	444	155	225	573	309	371	212	313	337	510	258	390	248	185	586	435	361	216	195	259	313	234	269	196	508	AACTGAGCAGCACCGTTTGCCTCATAGTGACGCACCAGCAGGTGGTTACCATGGAATGAGACAGCAGCAAAGCACTGTCCCTGTCGTCATGGAGCCCCTGAGCCATCTCCTAAGCAACCTGGCAGGAGATCCCCAAAC	FALSE	1.55509	1.45312	1.59843	1.3776	1.34377	1.35797	1.76894	2.43386	2.86808	1.58933	2.36428	1.51707	1.11955	1.36906	1.46331	1.24516	0.89909	1.34119	1.22597	1.0632	1.324
activeMutant_.i2.1170668745_mm_chr16:9281235$RFX5_RFX5at34^scrRFX5_scrRFX5at-63^scrRFX5_scrRFX5at-49^RFX5_RFX5at-26^scrCREB5_scrCREB5at-23^CREB5_CREB5at10^RFX5_RFX5at12_1	3359	3049	1354	2410	4630	2359	5004	1614	2105	2189	3658	1993	2422	2343	3031	7281	4582	4720	2871	1921	1881	2971	1588	2192	1367	3388	AACTGAGCAGCACCGTTTGCCTCATAGTGACGCACCAGCAGGTGGTTACCATGGAATGAGACAGCAGCAAAGCACTGTCCCTGTCGTCATGGAGCCCCTGAGCCCTCTCCTAAGCATCCTGGCAGGAGATCCCCAAAC	FALSE	1.18062	1.18814	1.05071	1.11012	0.95656	0.93365	1.40477	1.45807	1.62337	1.16072	1.20373	0.982535	0.96563	1.01068	1.03299	0.957177	0.903318	0.963396	1.69666	1.49581	1.38058
activeMutant_.ip.1155220598_mm_chr16:9281235$RFX5_RFX5at34^scrRFX5_scrRFX5at-63^scrRFX5_scrRFX5at-49^RFX5_RFX5at-26^scrCREB5_scrCREB5at-23^CREB5_CREB5at10^RFX5_RFX5at12_1	2950	3701	1627	2688	4544	2765	2011	943	1569	1621	2518	1363	2078	940	1679	3577	2441	2380	1610	1245	948	1539	867	1268	845	1807	AACTGAGCAGCACCGTTTGCCTCATAGTGACGCACCAGCAGGTGGTTACCATGGAATGAGACAGCAGCAAAGCACTGTCCCTGTCGTCATGGAGCCCCTGAGCCGTTGCCATGGCAACGTGGCAGGAGATCCCCAAAC	FALSE	2.02566	2.02535	2.24698	1.61667	1.77716	1.72332	3.89873	3.56075	4.73467	2.53656	3.63577	2.9378	1.3923	1.5572	1.37327	1.20242	1.16633	1.31105	2.13243	2.0908	2.23022
activeMutant_.If.-1959795376_mm_chr16:9281235$RFX5_RFX5at34^scrRFX5_scrRFX5at-63^scrRFX5_scrRFX5at-49^RFX5_RFX5at-26^scrCREB5_scrCREB5at-23^CREB5_CREB5at10^RFX5_RFX5at12_1	2775	3011	1345	3322	5968	3499	4606	1705	2318	2375	4920	2650	3351	2405	3287	7547	5019	5188	3430	2437	2202	3502	1643	2845	1595	3803	AACTGAGCAGCACCGTTTGCCTCATAGTGACGCACCAGCAGGTGGTTACCATGGAATGAGACAGCAGCAAAGCACTGTCCCTGTCGTCATGGAGCCCCTGAGCGTAGAGGATTCGTTGGTGGCAGGAGATCCCCAAAC	FALSE	1.54699	1.53909	1.41625	1.14248	1.0262	0.986868	2.10369	2.04183	2.61593	1.04177	1.29145	1.06034	1.22098	1.14885	1.12963	1.09164	1.03732	0.971067	1.81681	1.74098	1.70626
activeMutant_.If.1373664521_mm_chr16:9281235$CREB5_CREB5at10^scrRFX5_scrRFX5at-63^scrRFX5_scrRFX5at-49^RFX5_RFX5at-26^scrCREB5_scrCREB5at-23^RFX5_RFX5at12^RFX5_RFX5at34_1	850	718	390	590	972	442	1799	844	1267	1350	1827	935	1251	1485	829	2176	1239	1307	654	488	1041	1779	978	1330	720	1792	AACTGAGCAGCACCGTTTGCCTCATAGTGACGCACCAGCAGGTGGTTACCATGGAATGAGACAGCAGCAAAGCACTGTCGGACAGCAGTACGAGCCCCTGAGCCATCTCCTAAGCAACCTGGCAGGAGATCCCCAAAC	FALSE	0.930358	0.879463	0.856274	0.915914	0.908412	0.908486	0.956591	0.851432	0.846053	0.817	0.788466	0.787191	0.924416	0.839891	0.862059	0.835795	0.853414	0.936136	0.741266	0.537608	0.553348
activeMutant_.i2.-1825694451_mm_chr16:9281235$scrRFX5_scrRFX5at-49^scrRFX5_scrRFX5at-63^RFX5_RFX5at-26^scrCREB5_scrCREB5at-23^CREB5_CREB5at10^RFX5_RFX5at12^RFX5_RFX5at34_1	1254	1087	448	480	762	390	1317	489	690	731	732	472	600	813	706	2179	1369	1158	616	539	553	893	503	627	275	876	AACTGAGCAGCACCGTTTGCCTCTTAGTGACCCACCAGCAGGTGGTTACCATGGAATGAGACAGCAGCAAAGCACTGTCCCTGTCGTCATGGAGCCCCTGAGCCATCTCCTAAGCAACCTGGCAGGAGATCCCCAAAC	FALSE	0.680861	0.81093	0.750141	0.969297	0.903631	0.89854	1.06307	0.911767	1.01973	1.64644	1.63055	1.2352	0.796011	0.585948	0.769731	0.81098	0.782476	0.879436	1.19962	0.92492	1.11636
activeMutant_.If.583115915_mm_chr16:9281235$scrRFX5_scrRFX5at-49^scrRFX5_scrRFX5at-63^RFX5_RFX5at-26^scrCREB5_scrCREB5at-23^CREB5_CREB5at10^RFX5_RFX5at12^RFX5_RFX5at34_1	5838	6698	3424	1900	3671	1640	3649	1662	2491	2923	2768	1612	2130	1877	3135	7290	5813	3768	2152	1772	1795	2970	1551	1945	1223	2983	AACTGAGCAGCACCGTTTGCGAGTATCACTGCGTGGAGCAGGTGGTTACCATGGAATGAGACAGCAGCAAAGCACTGTCCCTGTCGTCATGGAGCCCCTGAGCCATCTCCTAAGCAACCTGGCAGGAGATCCCCAAAC	FALSE	1.11517	1.19959	1.15345	1.42694	1.413	1.55624	1.51875	1.58535	1.54766	2.76646	3.62628	3.40727	1.06954	1.1287	1.13531	1.14019	1.1272	1.17456	1.69072	1.39956	1.58966
activeMutant_.i1.1771229820_mm_chr16:9281235$scrRFX5_scrRFX5at-49^scrRFX5_scrRFX5at-63^RFX5_RFX5at-26^scrCREB5_scrCREB5at-23^CREB5_CREB5at10^RFX5_RFX5at12^RFX5_RFX5at34_1	1694	1992	869	1481	2490	1405	1333	748	1121	1192	1645	799	1298	844	1005	2216	1693	1895	1206	931	905	1446	711	842	581	1429	AACTGAGCAGCACCGTTTGCGTCATAGTGAAGCACCAGCAGGTGGTTACCATGGAATGAGACAGCAGCAAAGCACTGTCCCTGTCGTCATGGAGCCCCTGAGCCATCTCCTAAGCAACCTGGCAGGAGATCCCCAAAC	FALSE	1.47388	1.32232	1.5632	1.42823	1.41415	1.41138	3.24064	2.94363	3.62955	2.19744	2.95222	2.36721	1.0297	1.19248	1.20953	1.27844	1.2205	1.19744	1.891	1.74429	1.85743
activeMutant_.i2.-385271366_mm_chr16:9281235$scrRFX5_scrRFX5at-63^scrRFX5_scrRFX5at-49^RFX5_RFX5at-26^scrCREB5_scrCREB5at-23^CREB5_CREB5at10^RFX5_RFX5at12^RFX5_RFX5at34_1	1864	2082	1105	1516	2961	1601	1644	583	1018	1132	1460	791	1084	681	1186	3025	2466	2104	1149	988	703	1331	620	895	577	1195	AACTGAGCATCACCGTTCGCCTCATAGTGACGCACCAGCAGGTGGTTACCATGGAATGAGACAGCAGCAAAGCACTGTCCCTGTCGTCATGGAGCCCCTGAGCCATCTCCTAAGCAACCTGGCAGGAGATCCCCAAAC	FALSE	1.62123	1.62241	1.61795	1.37962	1.5916	1.66115	2.68969	2.83825	3.35348	1.96055	2.50189	2.44066	1.3565	1.46773	1.25356	1.23079	1.39233	1.29411	2.6021	2.05962	2.44295
RFXgreatMutant_.i1.-2036933834_mm_chr4:207108822$CREB5_CREB5at-36^scrRFX5_scrRFX5at0^RFX5_RFX5at21^CREB5_CREB5at27_1	7850	8905	4551	2036	3607	1863	4487	3454	5758	5756	4277	2260	3230	3203	2815	6299	5545	3560	2248	1695	2755	4475	2320	3337	1756	4276	AAGCCTGCTGGAATCCTGGGATGATTCCCCATCATTTACCGCCTGGGCTTGTTGGCTGTGATCTGCTGGTATGCATGGTGATAGGGAGGCAGTTGCTATGGCGACAGTAACTAGGAGGTGTATCAACTACCAGAATTG	FALSE	1.00977	0.985561	1.02501	1.73782	1.91402	1.79587	1.32351	1.26679	1.42976	3.02516	3.92074	3.68296	1.07533	0.949696	0.953688	1.02551	0.995283	1.02957	0.93609	0.856749	0.891083
RFXgreatMutant_.If.-411328982_mm_chr4:207108822$scrRFX5_scrRFX5at0^CREB5_CREB5at-36^RFX5_RFX5at21^CREB5_CREB5at27_1	4848	5909	2829	2054	3647	1981	3287	2658	4414	4777	4448	2524	3319	2701	2378	5279	4209	2839	2005	1623	2659	4666	2377	2947	1827	4426	AAGCCTGCTGGAATCCTGGGATGATTCCCCATCATTTACCTCATGGGCTTGTTGGCTGTGATCTGCTGGATACGTACCACTATCCGAGGCAGTTGCTATGGCGACAGTAACTAGGAGGTGTATCAACTACCAGAATTG	FALSE	1.24531	1.30526	1.24901	1.58588	1.73996	1.76743	1.82266	1.74844	2.07535	2.55034	3.55144	3.12521	1.12615	1.17174	1.17061	1.17373	1.23064	1.25093	0.885249	0.906158	1.01181
RFXgreatMutant_.i1.1033048824_mm_chr4:207108822$scrRFX5_scrRFX5at0^CREB5_CREB5at-36^RFX5_RFX5at21^CREB5_CREB5at27_1	3838	4311	2101	1307	2693	1157	3296	2338	3737	4258	3837	2122	2902	2284	1772	3643	2910	2044	1547	1045	2189	3490	1889	2520	1575	3676	AAGCCTGCTGGAATCCTGGGATGATTCCCCATCATTTACCTCATGGGCTTGTTGGCTGTGATCTGCTGGGATGCATGGTAATAGGGAGGCAGTTGCTATGGCGACAGTAACTAGGAGGTGTATCAACTACCAGAATTG	FALSE	1.27038	1.29772	1.29147	1.64963	1.74205	1.86303	1.15663	1.28755	1.20879	2.0135	2.58393	2.31465	1.1388	1.19454	1.14975	1.14268	1.08853	1.17561	0.753719	0.826815	0.770416
RFXgreatMutant_.i1.328840890_mm_chr4:207108822$RFX5_RFX5at21^CREB5_CREB5at-36^scrRFX5_scrRFX5at0^CREB5_CREB5at27_1	1201	1205	503	634	1160	562	2575	965	1741	1593	2212	1308	1607	2127	1316	2991	1969	2176	1048	907	1586	2406	1146	1644	1037	2422	AAGCCTGCTGGAATCCTGGGATGATTCCCCATCATTTACCTCATGGGCTTGTTGGCTGTGATCTGCTGGTATGCATGGTGATAGGGAGGCAGATGCTATGGCGAGAGTAACTAGGAGGTGTATCAACTACCAGAATTG	FALSE	0.786422	0.858959	0.767945	0.731136	0.871493	0.748443	0.718154	0.709897	0.751563	0.806492	0.924485	0.709312	0.797768	0.844555	0.813453	0.88902	0.805821	0.76585	0.861621	0.601462	0.718034
RFXgreatMutant_.If.1661339871_mm_chr4:207108822$CREB5_CREB5at27^CREB5_CREB5at-36^scrRFX5_scrRFX5at0^RFX5_RFX5at21_1	2086	1937	984	1251	2114	1065	4331	1999	3007	3080	3994	2231	3178	3071	2263	5442	4461	3321	2499	1672	2599	4166	2000	3072	1749	4415	AAGCCTGCTGGAATCCTGGGATGATTCCCCATCATTTACCTCATGGGCTTGTTGGCTGTGATCTGCTGGTATGCATGGTGATAGGGAGGCAGTTGCATACCGCTGTCAAACTAGGAGGTGTATCAACTACCAGAATTG	FALSE	0.983482	1.01473	1.05186	1.04899	1.04252	1.00226	0.842509	0.769186	0.846774	0.832838	0.88355	0.824999	1.03248	0.986568	1.02701	1.00903	0.966384	0.925714	0.910781	0.993346	0.916773
putativeConstitWgreatRFXsite_.chr4:207108822_base_RFX25_great_tiles_from_constitK27_CBP_peaks_1	5967	7124	3795	1961	3639	2159	4230	3566	5710	6457	5017	2780	3653	3198	2540	5403	4603	3199	2170	1544	2777	5200	2665	3155	1832	4885	AAGCCTGCTGGAATCCTGGGATGATTCCCCATCATTTACCTCATGGGCTTGTTGGCTGTGATCTGCTGGTATGCATGGTGATAGGGAGGCAGTTGCTATGGCGACAGTAACTAGGAGGTGTATCAACTACCAGAATTG	FALSE	1.18633	1.21422	1.16106	1.79697	1.90104	2.01773	1.35221	1.35568	1.75759	2.43921	3.32716	3.25775	1.01827	0.992348	1.09122	1.03532	1.15834	1.18453	0.842482	0.828315	0.812969
RFXgreatMutant_.i1.1203642259_mm_chr4:207108822$CREB5_CREB5at27^CREB5_CREB5at-36^scrRFX5_scrRFX5at0^RFX5_RFX5at21_1	6317	6736	3531	2439	4511	2483	6935	4029	5939	6455	6366	3476	4788	4827	4137	7691	7089	4635	3137	2629	4017	6939	3652	4757	2728	6440	AAGCCTGCTGGAATCCTGGGATGATTCCCCATCATTTACCTCATGGGCTTGTTGGCTGTGATCTGCTGGTATGCATGGTGATAGGGAGGCAGTTGCTATGGCGGCCGTAACTAGGAGGTGTATCAACTACCAGAATTG	FALSE	0.997304	1.00585	1.00823	1.34511	1.30999	1.33638	1.02582	1.02504	1.23292	1.57507	1.91887	1.84883	1.01718	0.979003	0.953091	0.992202	1.02407	1.07543	0.808718	0.793326	0.917104
RFXgreatMutant_.If.-793414945_mm_chr4:207108822$RFX5_RFX5at21^CREB5_CREB5at-36^scrRFX5_scrRFX5at0^CREB5_CREB5at27_1	1932	1925	952	1151	1927	1051	4069	1867	2707	3149	3758	2175	2868	3162	1877	4060	3664	3329	2277	1569	2587	4145	2213	2734	1737	3984	AAGCCTGCTGGAATCCTGGGATGATTCCCCATCATTTACCTCATGGGCTTGTTGGCTGTGATCTGCTGGTATGCATGGTGATAGGGAGGCTCAACGATACCGCTGTGTAACTAGGAGGTGTATCAACTACCAGAATTG	FALSE	0.898738	0.960792	0.921933	0.951527	0.911505	0.995226	0.825075	0.746292	0.889449	0.82102	0.934615	0.849563	0.89244	0.951601	0.900084	0.975462	0.933841	0.994824	0.8867	0.879054	0.835538
RFXgreatMutant_.If.-1870842119_mm_chr4:207108822$CREB5_CREB5at-36^scrRFX5_scrRFX5at0^RFX5_RFX5at21^CREB5_CREB5at27_1	8718	10075	5350	2292	4281	2235	3947	3770	6098	6929	4211	2313	3426	3464	3363	6982	6389	3351	2556	1825	3139	4522	2341	2669	1699	4043	AAGCCTGCTGGAATCCTGGGATGATTCCCCATCTAAATGGAGTACGGCTTGTTGGCTGTGATCTGCTGGTATGCATGGTGATAGGGAGGCAGTTGCTATGGCGACAGTAACTAGGAGGTGTATCAACTACCAGAATTG	FALSE	0.919275	0.932674	1.00529	1.75389	1.87431	1.99896	1.69376	1.7092	1.94992	3.8193	5.04275	4.9219	0.795267	0.849635	0.83378	1.08041	0.929957	0.960617	0.814744	0.900735	0.887136
inactive_.chr18:23602865_base_inactive_1	2313	1957	1067	1328	2218	881	2531	1327	2050	1918	2918	1643	2204	1930	2081	4934	3981	2957	1914	1391	1715	2403	1354	2088	1366	3092	AAGGGCCTTGTAGTCTTGGTAGCAGATGTAGTTATTCCAAGATTCTATTTTTGCTTAACAATATCCATCTGTATCATAGGCAGCATATGTTGCCATTTGTCTCACGGTGACAGCTCACTTCATTCATTTTCAGAAAGG	TRUE	1.14332	1.18908	1.16074	1.10803	1.13091	0.993121	1.53042	1.38097	1.19864	1.58022	1.52753	1.5308	1.11665	1.22606	1.14448	1.05945	0.886966	0.997213	1.29038	1.21059	1.2136
RFXrandMutant_.i1.1025100898_mm_chr12:177874880$CREB5_CREB5at-1^scrRFX5_scrRFX5at-39^RFX5_RFX5at45_1	1811	1505	993	881	1534	838	815	767	1042	1175	1097	628	798	846	960	2060	1977	1455	1087	630	871	1515	703	810	507	1265	AAGGGGGTGCTTTGAGCTCATCTGCATTACAGATCAGGTCTCTCCGAGAGAATCAGCCATCCATAATTCATTACAGGCTTCCTGCCGGGGATGGAGACAGCCTGATCCTAGCAACAGAGTCATAGCAACAGGAGCTGA	FALSE	0.980561	1.03686	0.95877	1.46105	1.31138	1.38796	3.153	2.96608	3.54073	3.84233	3.64812	4.42423	0.988227	1.03814	1.06818	1.22751	1.27571	1.18117	1.4485	1.56846	1.25394
RFXrandMutant_.i1.-1489596158_mm_chr12:177874880$RFX5_RFX5at45^scrRFX5_scrRFX5at-39^CREB5_CREB5at-1_1	557	499	199	283	595	276	549	438	509	614	683	434	504	571	529	1060	908	551	450	303	436	845	398	562	313	703	AAGGGGGTGCTTTGAGCTCATCTGCATTACAGATCAGGTCTCTCCGAGAGAATCAGCCATCCATAATTCATTACATGTTTCCTGCCGGGGATGGAGACAGCCTGATCCTAGCAACAAAGTCATAGCAAGAGGAGCTGA	FALSE	0.90453	1.06166	0.897173	1.23617	0.949105	1.07459	1.50356	1.70789	1.73118	1.75435	1.79564	1.31622	1.01588	0.949566	0.879518	0.910387	1.05422	0.990772	0.812719	0.962034	0.893536
putativeConstitWgoodRFXsite_.chr12:177874880_base_RFX25_great_tiles_from_constitK27_CBP_peaks_1	2164	2026	1222	1194	2211	1045	1221	1148	1582	1901	1851	969	1502	1100	1333	2846	2689	1964	1485	933	1191	2205	1076	1289	799	1776	AAGGGGGTGCTTTGAGCTCATCTGCATTACAGATCAGGTCTCTCCGAGAGAATCAGCCATCCATAATTCATTACATGTTTCCTGCCGGGGATGGAGACAGCCTGATCCTAGCAACAGAGTCATAGCAACAGGAGCTGA	FALSE	1.27248	1.23045	1.3879	1.68185	1.53125	1.72703	2.85229	2.85357	2.94718	3.06462	3.27804	3.63414	1.20949	1.25826	1.15339	1.29091	1.42799	1.39042	1.50374	1.64797	1.42822
RFXrandMutant_.If.38692899_mm_chr12:177874880$RFX5_RFX5at45^scrRFX5_scrRFX5at-39^CREB5_CREB5at-1_1	1644	1591	795	1139	2683	1061	2373	1680	2203	2239	3735	1782	2356	2375	2143	4537	3763	2831	1999	1206	2424	3923	2029	2378	1531	3533	AAGGGGGTGCTTTGAGCTCATCTGCATTACAGATCAGGTCTCTCCGAGAGAATCAGCCATCCATAATTCATTACATGTTTCCTGCCGGGGATGGAGACAGCCTGATCCTAGCAAGTCTCAGTATCGTTGTGGAGCTGA	FALSE	1.18923	1.04804	1.00831	1.13995	0.987605	0.942109	1.40001	1.78171	1.53966	1.19795	1.32453	1.21651	1.03345	1.11668	1.06269	1.21687	1.1767	1.21435	1.00392	1.02746	0.855045
RFXrandMutant_.If.1825762187_mm_chr12:177874880$CREB5_CREB5at-1^scrRFX5_scrRFX5at-39^RFX5_RFX5at45_1	1205	1139	585	477	1025	388	1009	613	949	1105	1252	685	1074	902	869	1811	1681	903	620	466	863	1397	692	1019	641	1295	AAGGGGGTGCTTTGAGCTCATCTGCATTACAGATCAGGTCTCTCCGAGAGAATCAGCCATCCATAATTGTAATGTACAAACCTGCCGGGGATGGAGACAGCCTGATCCTAGCAACAGAGTCATAGCAACAGGAGCTGA	FALSE	1.04963	1.06076	1.21026	1.0952	1.12019	1.22424	1.3789	1.60084	1.32418	2.06505	2.23009	2.10529	1.16603	1.23103	1.02563	1.14072	1.10332	1.0905	0.843152	0.839072	0.869931
RFXrandMutant_.i1.-740544979_mm_chr12:177874880$scrRFX5_scrRFX5at-39^CREB5_CREB5at-1^RFX5_RFX5at45_1	112	91	68	74	97	75	127	159	235	228	224	143	188	180	86	243	222	153	182	63	156	343	180	170	93	208	AAGGGGGTGCTTTGAGCTCATCTGCATTACGGATCAGGTCACTCCGAGAGAATCAGCCATCCATAATTCATTACATGTTTCCTGCCGGGGATGGAGACAGCCTGATCCTAGCAACAGAGTCATAGCAACAGGAGCTGA	FALSE	0.941052	1.10967	1.06162	1.42352	1.39004	1.26582	1.69955	1.2036	2.03359	1.52493	1.41556	1.94425	0.974807	0.895009	0.825499	1.0333	1.35748	1.42143	0.715886	1.23428	0.58935
RFXrandMutant_.If.-93644305_mm_chr12:177874880$scrRFX5_scrRFX5at-39^CREB5_CREB5at-1^RFX5_RFX5at45_1	2680	2397	1379	1074	2173	993	1803	1802	2773	2951	3047	1600	2387	1900	1830	4019	3232	2164	1636	1037	2035	3430	1917	2073	1207	3307	AAGGGGGTGCTTTGAGCTCATCTGCATTACTCTAGTCCAGAGAGGCAGAGAATCAGCCATCCATAATTCATTACATGTTTCCTGCCGGGGATGGAGACAGCCTGATCCTAGCAACAGAGTCATAGCAACAGGAGCTGA	FALSE	1.21271	1.17625	1.27697	1.52841	1.55392	1.55212	1.73746	1.89923	1.89653	2.57024	2.62641	2.77725	1.12613	1.10045	1.24339	1.27699	1.28603	1.43415	0.959243	1.0511	0.919032
inducibleMutant_.If.670682044_mm_chr6:4347775$RFX5_RFX5at-5_1	39	53	26	47	50	45	72	69	66	75	120	66	123	121	62	91	52	48	82	57	56	118	52	132	50	183	AAGTGATTGAATTCTTTACATGAGCACAGCACAAGCTCGCAGGCTGCGTGCGTCATTGGGCTCTCCAACGATCCTTTAGGATGAATAGAACCTAATATGCATTCAGCAACAGGCTGCCGACGCCATCCATCTCCACGG	FALSE	0.749953	0.761887	1.03324	0.918972	0.580752	0.619422	1.90402	1.09434	2.15222	0.936627	1.45423	1.31126	1.12598	0.715816	1.08042	0.551796	0.694715	0.610864	0.334103	0.827261	0.793222
inducibleMutant_.ip.1739434281_mm_chr6:4347775$RFX5_RFX5at-5_1	3062	3104	1640	2594	5993	2982	3047	2288	3453	3633	7498	4209	5800	2606	2206	5182	4426	3691	3220	2571	2582	3940	1972	4093	2422	6064	AAGTGATTGAATTCTTTACATGAGCACAGCACAAGCTCGCAGGCTGCGTGCGTCATTGGGCTCTCGTTGCCATGGCAACGATGAATAGAACCTAATATGCATTCAGCAACAGGCTGCCGACGCCATCCATCTCCACGG	FALSE	2.17575	2.25599	2.26222	1.41488	1.41076	1.39316	2.48315	3.09946	3.37009	1.73767	2.01252	1.95442	1.6211	1.60997	1.6623	1.18129	1.07704	1.07562	1.19287	1.50833	1.66124
inducibleMutant_.i2.1789157680_mm_chr6:4347775$RFX5_RFX5at-5_1	1524	1231	659	1764	2974	1748	2377	956	1681	1776	3622	2022	2839	1580	1481	3410	2167	3460	2566	2016	1467	2191	1159	2699	1718	4044	AAGTGATTGAATTCTTTACATGAGCACAGCACAAGCTCGCAGGCTGCGTGCGTCATTGGGCTCTGCTTGCTAGGAAATCCATGAATAGAACCTAATATGCATTCAGCAACAGGCTGCCGACGCCATCCATCTCCACGG	FALSE	1.73352	1.78754	1.82638	0.975078	1.13277	1.1233	2.16459	1.97163	2.53232	1.10864	1.0231	1.00671	1.76315	1.88358	1.82844	1.107	0.98786	1.04268	1.84435	1.9825	2.14852
inducibleMutant_.i1.-212353501_mm_chr6:4347775$RFX5_RFX5at-5_1	439	345	189	459	767	287	823	280	438	482	1055	493	637	525	401	1112	600	829	458	454	454	893	357	814	467	1078	AAGTGATTGAATTCTTTACATGAGCACAGCACAAGCTCGCAGGCTGCGTGCGTCATTGGGCTCTGGATGCTAGGAAATGCATGAATAGAACCTAATATGCATTCAGCAACAGGCTGCCGACGCCATCCATCTCCACGG	FALSE	1.51961	1.31166	1.23328	0.859483	0.888275	0.917484	1.62674	1.46862	1.20085	0.922357	0.82815	0.833889	1.60032	1.5409	1.46685	1.03103	1.21172	0.966575	1.3299	1.06493	1.45614
inducible_.chr6:4347775_base_inducible_1	1721	1753	828	1992	3008	1867	1980	1375	1898	2105	4731	2599	3868	1456	1146	2605	1645	2672	1881	1724	1232	2340	1031	2959	1712	4578	AAGTGATTGAATTCTTTACATGAGCACAGCACAAGCTCGCAGGCTGCGTGCGTCATTGGGCTCTGGTTGCTAGGAAATCCATGAATAGAACCTAATATGCATTCAGCAACAGGCTGCCGACGCCATCCATCTCCACGG	FALSE	2.45714	2.49331	2.70027	1.52188	1.38793	1.44478	2.93447	2.39402	3.24702	1.50297	1.74907	1.51849	2.09762	2.03685	2.24616	1.00885	1.14489	1.00652	1.54561	1.57704	1.9938
inducible_.chr21:38282316_base_inducible_1	739	590	260	1343	2003	1096	1110	829	1266	1398	3331	1638	2303	1083	686	1336	1016	1670	1029	1008	1073	2077	967	1799	962	2713	AATAAGATTAGTTGTGCTTCAGTCATAACATCGTAAGTTGCTAGGCAGCCAGAAGTGAGTTAATCAGAAAATGAATCATCAAAGACATGGTACGCAATCTCCTTTTATGGGTGTCTCATTCTTAAAACACTTTCAAGG	FALSE	2.32586	2.1126	2.16146	1.23357	1.24462	1.29	3.52906	2.84363	3.40012	1.15121	1.05007	0.850544	1.71453	1.53873	1.78956	1.18126	1.36621	1.26918	1.29871	1.15985	1.56725
inducible_.chr8:87500485_base_inducible_1	940	22	375	1716	3303	318	559	960	1425	1528	2926	1562	2284	1247	1492	180	1659	2767	1894	1863	1297	2085	1072	2356	1330	3257	AATCCCGGCCCCCTTCCCGGCGCCGCGGCCCTGCCCGGCAGAGCGGGGGGGAGGGGATTCCCGGAATCTGCCCGGAGACCGCGCTGGCGTCACTGAGCTGAATAGGCCCATATATGGGCAGAGCTTCCGTAACGTCAG	FALSE	1.77438	1.74963	1.86171	1.24063	1.21669	1.22452	8.95388	9.31132	1.95894	2.90771	0.0777501	2.43594	1.95007	1.84758	1.86585	1.24008	1.1911	1.22195	1.86882	1.85408	2.51566
inducibleMutant_.ip.928510391_mm_chr19:53400300$CREB5_CREB5at-69_1	2699	2557	872	4671	6638	3169	2742	2084	3216	3206	8429	4581	6129	2562	2173	5364	2437	7167	4126	3080	2919	4466	2557	6555	3923	9822	AATGACGTCACCCCTTTAGACCCAAATTTATCTCGGCTGCACACAGCCCCGCAGCTCCCGAGCTGCCGCCGCTGACTTTAGAGCTTACGCACAAAGTTAGACAAGGCTGACTCACTGGGCAGAGCCAAGGTTTTCCGT	FALSE	2.48791	2.49755	2.4316	1.31086	1.3365	1.25053	4.96876	3.81491	3.9798	1.70204	1.84227	1.15477	2.6408	2.6525	2.73871	1.35841	1.24179	1.41866	2.35604	1.96591	2.02431
Synthetic	27	27	48	63	98	73	51	145	168	146	219	79	105	40	32	30	77	205	110	106	241	372	238	77	68	106	AATGCGTGGGCGGAAATGCGTGGGCGGAAATGCGTGGGCGGAAATGCGTGGGCGGAAATGCGTGGGCGGAAATGCGTGGGCGGAAATGCGTGGGCGGAAATGCGTGGGCGGAAATGCGTGGGCGGAAATGCGTGGGCG	FALSE	4.14021	2.75867	2.66816	5.8418	4.47179	3.64757	3.6031	3.0281	4.929	0.915436	1.04588	3.41757	1.98689	2.94487	1.89309	7.18344	6.62511	8.45753	4.31637	3.35697	4.46222
Synthetic	1566	1551	998	1747	3008	1852	1962	2696	4300	4357	5754	3187	4549	4123	1104	3047	2385	3316	2361	2043	3672	5849	2839	4372	2518	6374	AATGCGTGGGCGGATTATTTTAAGAAATGCGTGGGCGGATTATTTTAAGAAATGCGTGGGCGGATTATTTTAAGAAATGCGTGGGCGGATTATTTTAAGAAATGCGTGGGCGGATTATTTTAAGAAATGCGTGGGCGG	FALSE	1.05535	1.07969	1.12146	1.05377	1.11042	1.05605	2.59716	2.41598	3.25049	1.38015	1.56172	1.84705	1.09448	1.05794	1.10439	1.06185	1.0106	0.978766	0.67737	0.699032	0.834373
inducibleMutant_.i2.-824093891_mm_chr12:3823545$RFX5_RFX5at-6^scrRFX5_scrRFX5at-54^scrCREB5_scrCREB5at-5_1	1671	1236	413	594	1157	388	3807	2312	3401	3387	4677	2581	3574	3741	1190	3258	1440	1269	814	516	3168	5314	2735	3665	2147	5123	AATTCCAGCTCTCTCACAGCAGCTATTTTGGGCATAAACCTTTTATTCTCTCTGCGTTAGGGGCCGTGCCATGGTATCCATTAGCGCAAGCAAAGGAGTCTGTGATTCAGACTCATCCCCTCCCCTGCGGCTGCCATA	FALSE	0.945405	0.963679	0.971066	0.995953	0.967947	0.90477	0.455102	0.478922	0.350958	0.758976	0.641395	0.393925	1.01118	0.994171	0.978278	1.00966	1.01192	1.03919	0.285692	0.265614	0.232256
inducibleMutant_.i2.-2086919178_mm_chr12:3823545$scrCREB5_scrCREB5at-5^scrRFX5_scrRFX5at-54^RFX5_RFX5at-6_1	1941	1523	537	928	1421	496	4477	2367	3649	3729	5721	2849	3939	4216	1341	4682	1597	1630	1101	780	3433	6096	2806	4254	2610	5842	AATTCCAGCTCTCTCACAGCAGCTATTTTGGGCATAAACCTTTTATTCTCTCTGCGTTAGGGGCCGTGCCATGGTGACCATTAGCGCAAGCAAAGGAGTCTGTGATTCAGACTCATCCCCTCCCCTGCGGCTGCCATA	FALSE	1.02615	0.943896	0.949658	0.904766	0.921522	0.883899	0.604598	0.500175	0.381506	0.749675	0.672052	0.435546	1.04145	1.0724	0.989889	0.970843	1.03004	0.946049	0.325621	0.318787	0.31153
inducibleMutant_.ip.121345446_mm_chr12:3823545$RFX5_RFX5at-6^scrRFX5_scrRFX5at-54^scrCREB5_scrCREB5at-5_1	3413	3313	1142	2328	3367	1414	2228	2430	3903	3995	6591	3733	5397	2181	815	2638	1075	1278	880	606	2297	3678	2080	2784	1665	4069	AATTCCAGCTCTCTCACAGCAGCTATTTTGGGCATAAACCTTTTATTCTCTCTGCGTTAGGGGCGTTGCCATGGCAACGATTAGCGCAAGCAAAGGAGTCTGTGATTCAGACTCATCCCCTCCCCTGCGGCTGCCATA	FALSE	2.28525	2.39075	2.51524	1.79552	1.90535	1.83051	3.04771	2.38146	2.18545	2.64884	2.93762	1.86122	1.31752	1.32244	1.33278	1.25569	1.20134	1.35561	0.493515	0.49254	0.467867
inducibleMutant_.i1.-816927363_mm_chr12:3823545$RFX5_RFX5at-6^scrRFX5_scrRFX5at-54^scrCREB5_scrCREB5at-5_1	1405	1235	348	615	1074	405	3030	1886	2629	2847	4111	2151	2822	2910	978	3219	1258	1106	746	515	2928	4120	2085	3088	1759	4344	AATTCCAGCTCTCTCACAGCAGCTATTTTGGGCATAAACCTTTTATTCTCTCTGCGTTAGGGGCTATGCCATGGTAAGCATTAGCGCAAGCAAAGGAGTCTGTGATTCAGACTCATCCCCTCCCCTGCGGCTGCCATA	FALSE	1.0683	1.03248	0.985703	1.04445	0.9619	0.977699	0.592022	0.558568	0.460276	0.801804	0.805219	0.417045	1.09528	1.0471	1.06641	1.19965	1.00859	1.01845	0.320101	0.312939	0.298002
inducible_.chr12:3823545_base_inducible_1	2283	1964	592	1937	2681	1271	3227	2445	3649	4039	9254	4789	6766	3095	1023	3473	1307	1881	1374	988	2946	4765	2344	5260	2997	7674	AATTCCAGCTCTCTCACAGCAGCTATTTTGGGCATAAACCTTTTATTCTCTCTGCGTTAGGGGCTGTGCCATGGTAACCATTAGCGCAAGCAAAGGAGTCTGTGATTCAGACTCATCCCCTCCCCTGCGGCTGCCATA	FALSE	2.26103	2.16131	2.22205	1.27308	1.25529	1.30414	1.7508	1.30922	1.35629	1.22332	1.20235	0.666146	1.75415	1.67742	1.77128	1.13487	1.09676	1.07652	0.511862	0.541926	0.537529
inducibleMutant_.i1.-1121150030_mm_chr12:3823545$scrCREB5_scrCREB5at-5^scrRFX5_scrRFX5at-54^RFX5_RFX5at-6_1	499	485	144	262	418	193	1437	962	1676	1812	2092	1076	1635	1784	492	1187	586	575	357	262	1458	2384	973	1745	982	2253	AATTCCAGCTCTCTCACAGCAGCTATTTTGGGCATAAACCTTTTATTCTCTCTGCGTTAGGGGCTGTGCGACGGTAACCATTAGCGCAAGCAAAGGAGTCTGTGATTCAGACTCATCCCCTCCCCTGCGGCTGCCATA	FALSE	0.886758	0.842461	0.931547	0.868998	1.00026	1.01502	0.531802	0.458389	0.462495	0.600452	0.666768	0.363875	1.00958	0.953528	0.902177	0.974402	0.951967	0.775255	0.271455	0.24428	0.247293
inducibleMutant_.i2.2040457987_mm_chr12:3823545$scrRFX5_scrRFX5at-54^RFX5_RFX5at-6^scrCREB5_scrCREB5at-5_1	4163	3514	1646	3601	5780	3249	5656	2746	4543	5024	8704	4554	6355	4496	3564	8635	5058	5832	3413	3081	3697	6676	3308	5085	2965	7308	AATTCCAGCTCTCTCACATCAGCTATCTTGGGCATAAACCTTTTATTCTCTCTGCGTTAGGGGCTGTGCCATGGTAACCATTAGCGCAAGCAAAGGAGTCTGTGATTCAGACTCATCCCCTCCCCTGCGGCTGCCATA	FALSE	1.46397	1.41481	1.43672	0.984267	1.07584	1.11669	1.85703	1.6104	1.97809	1.27272	1.22739	1.05674	1.16737	1.14239	1.16118	0.98039	1.05779	1.04584	1.09249	0.926668	1.15391
inducibleMutant_.ip.-1541958609_mm_chr12:3823545$scrRFX5_scrRFX5at-54^RFX5_RFX5at-6^scrCREB5_scrCREB5at-5_1	7183	7450	3832	6112	10356	5766	9102	5255	8182	8503	14572	7806	10800	8241	7197	16632	13107	11041	7099	5588	6867	11436	5790	9201	5359	13375	AATTCCAGCTCTCTCCCGAGAGTGATGCTCCGCATAAACCTTTTATTCTCTCTGCGTTAGGGGCTGTGCCATGGTAACCATTAGCGCAAGCAAAGGAGTCTGTGATTCAGACTCATCCCCTCCCCTGCGGCTGCCATA	FALSE	1.33714	1.32306	1.33207	1.02762	1.05709	1.03111	1.95863	1.79296	2.18144	1.36459	1.617	1.52875	1.15238	1.12647	1.15942	0.993488	0.988563	0.998678	1.12837	1.05155	1.14178
inducibleMutant_.i1.-673260558_mm_chr12:3823545$scrRFX5_scrRFX5at-54^RFX5_RFX5at-6^scrCREB5_scrCREB5at-5_1	3031	2570	1003	3028	3960	2058	4240	3072	4615	4921	10921	5869	8213	4396	1740	5755	2187	3097	1911	1549	4082	6328	3422	5999	3472	8951	AATTCCAGCTCTCTCGCAGCAGCTAATTTGGGCATAAACCTTTTATTCTCTCTGCGTTAGGGGCTGTGCCATGGTAACCATTAGCGCAAGCAAAGGAGTCTGTGATTCAGACTCATCCCCTCCCCTGCGGCTGCCATA	FALSE	1.87864	1.86483	1.899	1.12617	1.11775	1.11868	2.08303	1.47178	1.67142	1.2361	1.19745	0.858977	1.40852	1.36817	1.45459	1.10711	1.02546	1.10649	0.593346	0.530661	0.593334
inducibleMutant_.If.579583592_mm_chr12:3823545$scrRFX5_scrRFX5at-54^RFX5_RFX5at-6^scrCREB5_scrCREB5at-5_1	3394	3353	1317	3227	4935	2741	6270	3475	5427	5623	9208	4656	6996	5398	3128	9221	4445	5279	2965	2425	3994	7489	3994	5579	3194	8344	AATTCCAGCTCTCTCTGTCGTCGATAAAACCGCATAAACCTTTTATTCTCTCTGCGTTAGGGGCTGTGCCATGGTAACCATTAGCGCAAGCAAAGGAGTCTGTGATTCAGACTCATCCCCTCCCCTGCGGCTGCCATA	FALSE	1.28994	1.20479	1.31734	1.03743	1.07043	1.04099	1.50119	1.24032	1.50539	0.936006	1.05647	0.762719	1.06676	1.02499	1.10425	0.882167	0.988328	1.05172	0.823652	0.670511	0.756457
RFXgreatMutant_.i1.-1110876575_mm_chr6:88324055$RFX5_RFX5at2^scrRFX5_scrRFX5at-47^scrCREB5_scrCREB5at5_1	139	183	70	57	215	87	257	216	327	453	540	302	423	387	195	493	232	217	113	71	195	512	306	414	209	606	ACAGCATTCTGTTTGTGCGAGGCCAATTAAGATGCTGCCTCTAGTGCTAGGAGATGAAGAGCTGCAGAGACAGATGCCATGGAAAGCAATTTTCCCCACATTTCCTGCAGAGCCAGAAACCGCTGAGTAATATGCCTT	FALSE	1.05517	1.09	1.11099	0.899459	0.899641	1.16976	0.646915	1.31832	1.16571	0.935225	1.40672	0.989034	1.10416	0.935518	1.11863	0.600758	0.942474	1.12392	0.472252	0.356436	0.308925
RFXgreatMutant_.i1.-561449313_mm_chr6:88324055$scrCREB5_scrCREB5at5^scrRFX5_scrRFX5at-47^RFX5_RFX5at2_1	781	796	307	272	571	257	853	639	814	904	1165	562	810	792	863	1676	1090	776	404	353	805	1215	673	780	446	994	ACAGCATTCTGTTTGTGCGAGGCCAATTAAGATGCTGCCTCTAGTGCTAGGAGATGAAGAGCTGCAGAGACAGTTGCCAGGCAAACCAATTTTCCCCACATTTCCTGCAGAGCCAGAAACCGCTGAGTAATATGCCTT	FALSE	1.11234	0.991159	1.03954	1.30021	1.09429	1.14065	0.930091	1.05488	1.03751	1.5832	1.84355	1.30688	1.01651	0.975498	0.896575	1.21184	1.09285	1.20786	0.825204	0.622688	0.750507
putativeConstitWgreatRFXsite_.chr6:88324055_base_RFX25_great_tiles_from_constitK27_CBP_peaks_1	1625	1826	828	402	885	325	872	630	1107	971	873	411	643	396	579	1683	932	607	432	313	374	792	496	501	385	661	ACAGCATTCTGTTTGTGCGAGGCCAATTAAGATGCTGCCTCTAGTGCTAGGAGATGAAGAGCTGCAGAGACAGTTGCCATGGAAACCAATTTTCCCCACATTTCCTGCAGAGCCAGAAACCGCTGAGTAATATGCCTT	FALSE	1.66708	1.4497	1.65043	2.5638	2.97636	2.45039	1.34467	1.59934	1.28343	3.22234	4.13689	3.44795	1.30582	1.68416	1.19243	1.12604	1.42476	1.78038	1.29098	1.33169	1.33093
RFXgreatMutant_.i1.123404447_mm_chr6:88324055$scrRFX5_scrRFX5at-47^RFX5_RFX5at2^scrCREB5_scrCREB5at5_1	965	1038	429	336	414	196	552	488	808	813	788	363	503	464	391	997	546	483	270	178	649	874	378	438	262	735	ACAGCATTCTGTTTGTGCGAGGGCAATTAAGAAGCTGCCTCTAGTGCTAGGAGATGAAGAGCTGCAGAGACAGTTGCCATGGAAACCAATTTTCCCCACATTTCCTGCAGAGCCAGAAACCGCTGAGTAATATGCCTT	FALSE	1.28424	1.09275	1.10187	1.69489	1.85407	1.75099	1.77544	1.18189	1.22271	3.02289	3.71491	2.82205	0.974313	0.978138	1.13161	1.66764	1.34185	1.15798	0.876706	0.71033	0.645963
RFXgreatMutant_.If.-875807225_mm_chr6:88324055$scrRFX5_scrRFX5at-47^RFX5_RFX5at2^scrCREB5_scrCREB5at5_1	3389	3707	1579	930	1367	626	1220	1599	2238	2677	1572	964	1160	1232	1021	2662	1658	1061	612	410	1270	1732	1084	1129	657	1774	ACAGCATTCTGTTTGTGCGAGGGGTTAATTCTACGACGCTCTAGTGCTAGGAGATGAAGAGCTGCAGAGACAGTTGCCATGGAAACCAATTTTCCCCACATTTCCTGCAGAGCCAGAAACCGCTGAGTAATATGCCTT	FALSE	0.964895	1.09295	0.957038	2.09159	1.93411	2.17144	2.22346	1.76573	1.76694	4.80337	6.00278	4.69969	0.945857	0.923786	1.02865	1.22905	1.00149	1.25068	0.72532	0.606394	0.560375
RFXrandMutant_.i1.-1724122489_mm_chr19:32330690$scrCREB5_scrCREB5at-34^RFX5_RFX5at-13^scrCREB5_scrCREB5at7^scrRFX5_scrRFX5at22_1	2800	3028	1476	640	1275	608	1035	2143	3207	3891	2204	1196	1625	1212	728	1850	1223	748	507	380	1402	2502	1262	1352	784	2196	ACAGTCAAGTAAATGCCTGCCTATTTTATTTATCTTTTAGGGCAGCTAAATCTATCAGTTTCCATGGCGCCCTGTATTCACCATGGAAACTCTGACAAGCTCGTTGTGCTTTAAGGAGGAAAGAAAAGACACACCAGA	FALSE	1.37514	1.37835	1.3628	2.84943	2.81727	3.20826	1.80362	1.94126	2.02288	4.67791	5.7797	5.17836	1.15137	1.12055	1.29436	1.37918	1.4706	1.48007	0.519785	0.510646	0.527942
RFXrandMutant_.i1.-1746370600_mm_chr19:32330690$RFX5_RFX5at-13^scrCREB5_scrCREB5at-34^scrCREB5_scrCREB5at7^scrRFX5_scrRFX5at22_1	865	829	352	374	478	251	729	666	961	1207	1413	700	942	1087	486	1174	723	466	355	297	802	1334	709	925	516	1240	ACAGTCAAGTAAATGCCTGCCTATTTTATTTATCTTTTAGTGTAGCTAAATCTATCAGATTCCATGGCGCGCTGTATTCACCATGGAAACTCTGACAAGCTCGTTGTGCTTTAAGGAGGAAAGAAAAGACACACCAGA	FALSE	0.982994	0.899499	0.880853	0.987378	0.941296	1.10966	1.49641	1.03327	1.18564	2.05174	2.24655	1.75332	0.878323	0.822313	0.814925	0.879671	0.874252	0.927136	0.361061	0.39867	0.460079
putativeConstitWgoodRFXsite_.chr19:32330690_base_RFX25_great_tiles_from_constitK27_CBP_peaks_1	1153	1251	628	291	596	272	266	949	1345	1459	866	423	597	318	283	813	706	286	129	133	471	833	442	451	259	604	ACAGTCAAGTAAATGCCTGCCTATTTTATTTATCTTTTAGTGTAGCTAAATCTATCAGTTTCCATGGCGCCCTGTATTCACCATGGAAACTCTGACAAGCTCGTTGTGCTTTAAGGAGGAAAGAAAAGACACACCAGA	FALSE	2.05934	1.858	1.90822	4.80925	4.50327	4.585	3.19093	3.53085	3.52122	7.49518	9.29107	8.57284	1.46383	1.41088	1.35686	1.76591	1.86607	1.9757	0.757467	0.495196	0.704255
RFXrandMutant_.If.493242527_mm_chr19:32330690$scrRFX5_scrRFX5at22^scrCREB5_scrCREB5at-34^RFX5_RFX5at-13^scrCREB5_scrCREB5at7_1	321	325	137	33	125	54	129	471	670	683	209	114	199	150	83	290	203	63	42	39	180	378	202	179	92	232	ACAGTCAAGTAAATGCCTGCCTATTTTATTTATCTTTTAGTGTAGCTAAATCTATCAGTTTCCATGGCGCCCTGTATTCACCATGGAAACTGACTGTTCGAGCAACAGCTTTAAGGAGGAAAGAAAAGACACACCAGA	FALSE	1.05364	1.06156	1.34848	5.06021	4.75572	4.5503	0.746156	1.52699	1.44149	4.30279	4.97718	3.85636	1.2317	1.06246	1.1049	1.43073	1.79519	1.9142	0.353732	0.3418	0.437803
RFXrandMutant_.i1.1306136555_mm_chr19:32330690$scrRFX5_scrRFX5at22^scrCREB5_scrCREB5at-34^RFX5_RFX5at-13^scrCREB5_scrCREB5at7_1	559	713	399	80	228	136	141	342	569	663	372	180	265	231	161	411	300	163	94	51	174	309	162	164	108	238	ACAGTCAAGTAAATGCCTGCCTATTTTATTTATCTTTTAGTGTAGCTAAATCTATCAGTTTCCATGGCGCCCTGTATTCACCATGGAAACTGTGACAAGCTAGTTGTGCTTTAAGGAGGAAAGAAAAGACACACCAGA	FALSE	1.21778	1.08841	1.16605	2.3859	2.6226	2.86822	1.65492	2.54818	3.32144	6.85531	9.98988	10.2754	0.732781	0.809895	0.736022	0.898076	0.952921	0.99685	0.594293	0.496741	0.371761
RFXrandMutant_.i1.1995937948_mm_chr19:32330690$scrCREB5_scrCREB5at7^scrCREB5_scrCREB5at-34^RFX5_RFX5at-13^scrRFX5_scrRFX5at22_1	396	344	182	133	278	144	364	530	790	932	695	482	668	500	150	470	320	359	196	124	444	908	445	511	367	823	ACAGTCAAGTAAATGCCTGCCTATTTTATTTATCTTTTAGTGTAGCTAAATCTATCAGTTTCCATGGCGCCCTGTATTCACGACGGAAACTCTGACAAGCTCGTTGTGCTTTAAGGAGGAAAGAAAAGACACACCAGA	FALSE	1.05112	1.34651	1.35796	1.70822	1.68225	1.86276	1.06575	1.20353	1.36228	1.88117	1.86701	1.81558	1.05486	1.27149	1.17586	1.05874	1.29368	1.26508	0.604713	0.47852	0.417597
inducibleMutant_.ip.-52750140_mm_chr7:130920632$scrCREB5_scrCREB5at-45^RFX5_RFX5at33^scrRFX5_scrRFX5at41^scrCREB5_scrCREB5at46^scrRFX5_scrRFX5at49^scrCREB5_scrCREB5at55_1	2481	2567	1096	2838	6877	3108	3017	1949	2787	2980	4262	2471	3187	2540	2052	4827	4055	4558	2995	2415	2175	3648	1654	3028	1595	3976	ACATACTTATTATCAGCATCCATTAACCCTCAAGGTATTCTATGACGTCCATTGCAGTGAGTGAGTCAGAAGCCACAAGCTAACAGGTCTATTCCTTCCCACCGTCACCTTGGAAACCAATGCATCATCCACAGGAAA	FALSE	1.26887	1.35885	1.27535	1.23656	1.16825	1.17245	2.74374	3.59202	3.54741	1.42195	1.68089	1.31911	1.23045	1.08779	1.11825	1.02094	1.02313	0.925611	1.51135	1.43939	1.60099
inducibleMutant_.If.1521922709_mm_chr7:130920632$scrCREB5_scrCREB5at-45^RFX5_RFX5at33^scrRFX5_scrRFX5at41^scrCREB5_scrCREB5at46^scrRFX5_scrRFX5at49^scrCREB5_scrCREB5at55_1	1755	1959	995	3346	6991	4162	2173	1476	2069	2235	4060	2226	3192	1726	1736	3611	2779	5273	4094	3914	1646	2634	1398	2693	1466	4082	ACATACTTATTATCAGCATCCATTACAAGTCGATGTATTCTATGACGTCCATTGCAGTGAGTGAGTCAGAAGCCACAAGCTAACAGGTCTATTCCTTCCCACCGTCACCTTGGAAACCAATGCATCATCCACAGGAAA	FALSE	1.77878	1.80143	1.87977	1.37811	1.2763	1.29404	4.4913	5.06984	6.59551	1.39653	1.781	1.66268	1.61042	1.47133	1.6895	1.13701	1.08714	1.15131	2.57301	2.89548	3.81843
inducibleMutant_.i2.779883537_mm_chr7:130920632$scrCREB5_scrCREB5at-45^RFX5_RFX5at33^scrRFX5_scrRFX5at41^scrCREB5_scrCREB5at46^scrRFX5_scrRFX5at49^scrCREB5_scrCREB5at55_1	1795	2059	856	3813	6808	4161	2414	1270	1892	1750	4437	2197	3226	1577	1581	3757	2225	7031	5170	4122	1401	2132	1242	2811	1726	4132	ACATACTTATTATCAGCATCCATTCGTTCAGCTACGATTCTATGACGTCCATTGCAGTGAGTGAGTCAGAAGCCACAAGCTAACAGGTCTATTCCTTCCCACCGTCACCTTGGAAACCAATGCATCATCCACAGGAAA	FALSE	2.12763	1.94594	2.07929	1.29781	1.27739	1.10896	4.60718	4.44423	5.93563	1.28576	1.68504	1.28761	1.8398	1.89595	1.87178	1.05921	0.963088	1.11948	3.755	4.00196	4.40131
inducibleMutant_.i2.-157488791_mm_chr7:130920632$RFX5_RFX5at33^scrCREB5_scrCREB5at-45^scrRFX5_scrRFX5at41^scrCREB5_scrCREB5at46^scrRFX5_scrRFX5at49^scrCREB5_scrCREB5at55_1	2163	1943	895	983	2553	1325	3302	1285	2079	2014	2947	1713	2117	2296	2359	4994	3566	2914	2322	1595	1843	3148	1501	2099	1300	3260	ACATACTTATTATCAGCATCCATTTGTTCAGCTACAATTCTATGACGTCCATTGCAGTGAGTGAGTCAGAAGCCACAAGCTAACAGGTCTATTCCTTCCCACCCTCACCTTGGAATCCAATGCATCATCCACAGGAAA	FALSE	0.970614	1.04212	0.937197	0.901924	0.964084	0.876594	0.868325	1.2184	1.3818	1.1327	1.16248	0.984221	0.943589	0.980818	1.01431	0.957038	0.976727	0.929256	1.06891	1.23454	1.16975
inducibleMutant_.i1.-1592990519_mm_chr7:130920632$RFX5_RFX5at33^scrCREB5_scrCREB5at-45^scrRFX5_scrRFX5at41^scrCREB5_scrCREB5at46^scrRFX5_scrRFX5at49^scrCREB5_scrCREB5at55_1	685	645	375	451	1069	591	1552	835	1214	1199	1696	938	1303	1131	803	1827	1297	1182	904	656	990	1545	851	1355	827	1835	ACATACTTATTATCAGCATCCATTTGTTCAGCTACAATTCTATGACGTCCATTGCAGTGAGTGAGTCAGAAGCCACAAGCTAACAGGTCTATTCCTTCCCACCGACACCTTGGAAAGCAATGCATCATCCACAGGAAA	FALSE	1.13397	1.15844	1.17102	1.18977	1.14285	1.05942	0.847599	1.08543	1.3113	0.763191	0.821028	0.877377	1.23657	1.26666	1.15904	1.04363	0.973142	1.06953	0.880197	0.975708	0.976667
inducibleMutant_.If.1498695317_mm_chr7:130920632$scrRFX5_scrRFX5at41^scrCREB5_scrCREB5at-45^RFX5_RFX5at33^scrCREB5_scrCREB5at46^scrRFX5_scrRFX5at49^scrCREB5_scrCREB5at55_1	1720	1967	901	1485	3649	1564	3467	1376	2284	2412	3666	1863	2667	2517	2521	4937	3880	3571	2770	2265	1917	3195	1744	2666	1556	3787	ACATACTTATTATCAGCATCCATTTGTTCAGCTACAATTCTATGACGTCCATTGCAGTGAGTGAGTCAGAAGCCACAAGCTAACAGGTCTATTCCTTCCCACCGTCACCTACCTTTGGTTACGTAGATCCACAGGAAA	FALSE	1.10141	1.03386	1.07702	0.880996	0.966152	0.957646	1.24933	1.65857	1.55342	0.857845	1.12083	0.943664	1.09325	1.07089	1.07482	0.90806	0.90427	0.984895	1.1949	1.34342	1.51527
inducibleMutant_.ip.516808460_mm_chr7:130920632$scrRFX5_scrRFX5at41^scrCREB5_scrCREB5at-45^RFX5_RFX5at33^scrCREB5_scrCREB5at46^scrRFX5_scrRFX5at49^scrCREB5_scrCREB5at55_1	1606	1622	799	1080	2429	1136	2541	1249	1794	2086	2571	1539	2087	1767	1610	4511	3108	2403	1703	1140	1553	2795	1168	1945	1062	2939	ACATACTTATTATCAGCATCCATTTGTTCAGCTACAATTCTATGACGTCCATTGCAGTGAGTGAGTCAGAAGCCACAAGCTAACAGGTCTATTCCTTCCCACCGTCACCTCCGAGAGTGATGCTCCATCCACAGGAAA	FALSE	1.10028	1.21656	1.20052	1.13911	1.08098	1.17975	1.23972	1.50639	1.5395	1.09289	1.26106	1.1418	1.13612	1.04113	1.1882	1.04788	1.12682	0.939578	1.14536	1.1765	1.08636
inducibleMutant_.i1.1054892154_mm_chr7:130920632$scrRFX5_scrRFX5at41^scrCREB5_scrCREB5at-45^RFX5_RFX5at33^scrCREB5_scrCREB5at46^scrRFX5_scrRFX5at49^scrCREB5_scrCREB5at55_1	1128	1082	462	1890	4297	1989	1697	896	1334	1446	2725	1285	1844	1315	865	2366	2074	3518	2697	2071	1240	1958	1080	1835	1000	2750	ACATACTTATTATCAGCATCCATTTGTTCAGCTACAATTCTATGACGTCCATTGCAGTGAGTGAGTCAGAAGCCACAAGCTAACAGGTCTATTCCTTCCCACCGTCACCTGGGAAACCAAAGCATCATCCACAGGAAA	FALSE	1.56704	1.36493	1.42534	1.09805	1.0801	1.09889	3.24852	3.99023	4.03607	1.14937	1.25961	0.988568	1.4403	1.31732	1.49394	1.12427	1.06071	1.16741	2.25317	2.50363	2.65192
inducibleMutant_.ip.1007383256_mm_chr7:130920632$scrCREB5_scrCREB5at46^scrCREB5_scrCREB5at-45^RFX5_RFX5at33^scrRFX5_scrRFX5at41^scrRFX5_scrRFX5at49^scrCREB5_scrCREB5at55_1	1282	1238	585	911	1836	812	2119	1151	1887	2133	2627	1422	2088	1846	1589	3280	2051	2320	1595	1005	1465	2690	1209	2099	1139	2712	ACATACTTATTATCAGCATCCATTTGTTCAGCTACAATTCTATGACGTCCATTGCAGTGAGTGAGTCAGAAGCCACAAGCTAACAGGTCTATTCCTTCCCACCGTCACCTTGGAAAACCCTCAAGGTTCCACAGGAAA	FALSE	1.07613	1.07597	1.14969	1.00481	1.08836	1.1547	1.25399	1.36539	1.31957	1.04614	1.1542	1.00247	1.17361	1.06883	1.0495	0.946197	1.03808	0.930939	1.05848	1.05473	0.916726
inducibleMutant_.i1.350817543_mm_chr7:130920632$scrCREB5_scrCREB5at46^scrCREB5_scrCREB5at-45^RFX5_RFX5at33^scrRFX5_scrRFX5at41^scrRFX5_scrRFX5at49^scrCREB5_scrCREB5at55_1	2731	3058	1259	5161	10305	5826	3982	2145	3360	3446	5817	3070	4391	2736	2590	5930	4932	6722	4693	4157	2968	4535	2169	3463	2118	5382	ACATACTTATTATCAGCATCCATTTGTTCAGCTACAATTCTATGACGTCCATTGCAGTGAGTGAGTCAGAAGCCACAAGCTAACAGGTCTATTCCTTCCCACCGTCACCTTGGAAACCAAGGCATCATCCACAGGAAA	FALSE	1.60776	1.56731	1.63128	1.26343	1.30754	1.25866	3.7804	4.07813	5.0382	1.18592	1.51714	1.14808	1.30641	1.34099	1.40525	1.29337	1.18079	1.12686	2.06922	2.09387	2.55841
inducibleMutant_.ip.-628458920_mm_chr7:130920632$scrCREB5_scrCREB5at55^scrCREB5_scrCREB5at-45^RFX5_RFX5at33^scrRFX5_scrRFX5at41^scrCREB5_scrCREB5at46^scrRFX5_scrRFX5at49_1	1284	1226	559	1174	2613	1081	1915	952	1362	1383	2032	1062	1522	1456	1093	2964	1863	2131	1541	1022	1052	1855	821	1394	901	2209	ACATACTTATTATCAGCATCCATTTGTTCAGCTACAATTCTATGACGTCCATTGCAGTGAGTGAGTCAGAAGCCACAAGCTAACAGGTCTATTCCTTCCCACCGTCACCTTGGAAACCAATGCAAACCCTCAAGGTAA	FALSE	1.05536	1.01881	1.06252	1.05369	0.995975	0.94923	1.78815	2.15023	1.94385	1.15939	1.26477	1.05996	0.988197	1.07196	1.08383	0.86145	0.907597	0.801509	1.23267	1.29198	1.18194
inducibleMutant_.If.1473682236_mm_chr7:130920632$scrCREB5_scrCREB5at55^scrCREB5_scrCREB5at-45^RFX5_RFX5at33^scrRFX5_scrRFX5at41^scrCREB5_scrCREB5at46^scrRFX5_scrRFX5at49_1	2502	2432	1214	2235	5214	3005	3872	1354	2047	2159	3249	1738	2377	2301	2852	5663	4228	4168	2900	2233	1845	2728	1392	2232	1208	3259	ACATACTTATTATCAGCATCCATTTGTTCAGCTACAATTCTATGACGTCCATTGCAGTGAGTGAGTCAGAAGCCACAAGCTAACAGGTCTATTCCTTCCCACCGTCACCTTGGAAACCAATGCAAGTAGGTGTCCTAA	FALSE	1.06775	1.05503	1.05001	0.948289	0.947183	0.937663	1.68363	2.12202	2.67249	1.11734	1.24085	1.13849	1.0012	0.909426	1.0118	0.955995	0.844575	0.859903	1.52558	1.53849	1.6341
inducibleMutant_.i2.278346641_mm_chr7:130920632$scrCREB5_scrCREB5at55^scrCREB5_scrCREB5at-45^RFX5_RFX5at33^scrRFX5_scrRFX5at41^scrCREB5_scrCREB5at46^scrRFX5_scrRFX5at49_1	1085	1289	626	1635	3300	1846	1775	964	1465	1460	2196	1177	1461	1444	1120	2796	1894	2585	1484	1315	1173	2130	995	1456	824	1878	ACATACTTATTATCAGCATCCATTTGTTCAGCTACAATTCTATGACGTCCATTGCAGTGAGTGAGTCAGAAGCCACAAGCTAACAGGTCTATTCCTTCCCACCGTCACCTTGGAAACCAATGCACCATCCACAGGGAA	FALSE	1.15001	1.13852	1.02841	1.07584	1.0802	1.01041	2.68674	2.92975	3.58129	1.05698	1.43465	1.28063	1.04073	0.988501	0.929082	0.968515	1.05081	0.979451	1.50771	1.25453	1.53343
inducible_.chr7:130920632_base_inducible_1	704	758	349	1621	3403	1930	1041	511	828	881	1597	898	1321	723	599	1568	1181	2606	1891	1834	658	1146	500	1070	709	1724	ACATACTTATTATCAGCATCCATTTGTTCAGCTACAATTCTATGACGTCCATTGCAGTGAGTGAGTCAGAAGCCACAAGCTAACAGGTCTATTCCTTCCCACCGTCACCTTGGAAACCAATGCATCATCCACAGGAAA	FALSE	1.67034	1.73488	1.85715	1.13899	1.21934	1.21772	4.5419	5.15141	6.38429	1.16938	1.4385	1.21737	1.52752	1.69873	1.70343	1.08508	1.12916	0.983011	3.03571	3.19277	4.27136
inducibleMutant_.i1.1633895582_mm_chr7:130920632$scrCREB5_scrCREB5at55^scrCREB5_scrCREB5at-45^RFX5_RFX5at33^scrRFX5_scrRFX5at41^scrCREB5_scrCREB5at46^scrRFX5_scrRFX5at49_1	1541	1841	860	4033	7555	4496	2640	988	1678	1678	3492	2032	2720	2012	1743	3424	2513	6749	5101	4415	1431	2208	1097	2350	1404	3233	ACATACTTATTATCAGCATCCATTTGTTCAGCTACAATTCTATGACGTCCATTGCAGTGAGTGAGTCAGAAGCCACAAGCTAACAGGTCTATTCCTTCCCACCGTCACCTTGGAAACCAATGCATCATCGACAGGAAA	FALSE	1.31246	1.41068	1.37411	0.791348	0.887966	0.833441	4.45584	4.50967	5.86447	1.00933	1.37765	1.18288	1.20554	1.2088	1.1479	0.847983	0.781774	0.775006	2.82512	3.09486	3.69495
inducibleMutant_.i2.686935719_mm_chr7:130920632$scrRFX5_scrRFX5at49^scrCREB5_scrCREB5at-45^RFX5_RFX5at33^scrRFX5_scrRFX5at41^scrCREB5_scrCREB5at46^scrCREB5_scrCREB5at55_1	2223	2239	1149	3942	7827	4568	3289	2511	3991	4134	4973	2595	3669	2089	2049	4689	3537	6976	4299	3840	3505	5752	3465	3228	1946	4958	ACATACTTATTATCAGCATCCATTTGTTCAGCTACAATTCTATGACGTCCATTGCAGTGAGTGAGTCAGAAGCCACAAGCTAACAGGTCTATTCCTTCCCACCGTCACCTTGGAAACCAATTCATCATCCACAGGAAA	FALSE	1.80019	1.73513	1.78522	1.93708	2.03412	1.97762	3.49589	3.75013	4.78265	1.16872	1.34487	1.26854	1.59491	1.61369	1.69548	2.00044	1.96151	2.35772	2.8125	2.51214	3.09527
inducibleMutant_.ip.-2120324738_mm_chr7:130920632$scrRFX5_scrRFX5at49^scrCREB5_scrCREB5at-45^RFX5_RFX5at33^scrRFX5_scrRFX5at41^scrCREB5_scrCREB5at46^scrCREB5_scrCREB5at55_1	1904	1874	853	1926	4198	2186	2704	1592	2636	2605	3511	1883	2680	2254	2033	4204	3605	3749	2716	2090	2257	3885	1841	2910	1534	3894	ACATACTTATTATCAGCATCCATTTGTTCAGCTACAATTCTATGACGTCCATTGCAGTGAGTGAGTCAGAAGCCACAAGCTAACAGGTCTATTCCTTCCCACCGTCACCTTGGAAACCCCGAGAGTGATGCTCCGAAA	FALSE	1.17792	1.16689	1.20855	1.13822	1.24516	1.15495	2.07757	2.44653	2.78387	1.21757	1.36916	1.14548	1.33254	1.17893	1.23415	1.19386	1.22786	1.16098	1.40083	1.47092	1.56134
inducibleMutant_.i1.-1786139498_mm_chr7:130920632$scrRFX5_scrRFX5at49^scrCREB5_scrCREB5at-45^RFX5_RFX5at33^scrRFX5_scrRFX5at41^scrCREB5_scrCREB5at46^scrCREB5_scrCREB5at55_1	1765	1867	788	3503	7057	3959	2226	1496	2089	2525	4031	2303	3130	1840	1406	3247	2349	5701	4014	3855	1727	2949	1265	2775	1610	3926	ACATACTTATTATCAGCATCCATTTGTTCAGCTACAATTCTATGACGTCCATTGCAGTGAGTGAGTCAGAAGCCACAAGCTAACAGGTCTATTCCTTCCCACCGTCACCTTGGAAACCGATGCATCATACACAGGAAA	FALSE	1.65666	1.74827	1.72905	1.31024	1.2088	1.37137	4.59008	4.99585	6.12444	1.37105	1.65695	1.28543	1.55664	1.51574	1.52426	1.11905	1.14174	0.977236	2.6095	2.66302	3.52786
inducibleMutant_.If.613771715_mm_chr7:130920632$scrRFX5_scrRFX5at49^scrCREB5_scrCREB5at-45^RFX5_RFX5at33^scrRFX5_scrRFX5at41^scrCREB5_scrCREB5at46^scrCREB5_scrCREB5at55_1	3232	3549	1400	5184	10108	6100	5193	2115	3440	3617	6601	3406	4608	3744	4018	7618	5743	10184	6773	6143	3013	5092	2609	4295	2515	6683	ACATACTTATTATCAGCATCCATTTGTTCAGCTACAATTCTATGACGTCCATTGCAGTGAGTGAGTCAGAAGCCACAAGCTAACAGGTCTATTCCTTCCCACCGTCACCTTGGAAACCTTACGTAGTAGGTGTCGAAA	FALSE	1.33325	1.27069	1.251	0.91036	0.978262	0.965436	2.91174	3.06734	4.04499	1.07619	1.35014	0.97894	1.18405	1.16364	1.27515	0.959487	0.968864	0.990524	2.29091	2.20831	2.7628
inducibleMutant_.i2.-757163178_mm_chr7:130920632$scrCREB5_scrCREB5at46^scrCREB5_scrCREB5at-45^RFX5_RFX5at33^scrRFX5_scrRFX5at41^scrRFX5_scrRFX5at49^scrCREB5_scrCREB5at55_1	1307	1452	668	966	1795	817	2549	1093	1688	1718	2157	1189	1609	1663	1381	3609	2740	2318	1542	1083	1439	2126	1067	1585	892	2325	ACATACTTATTATCAGCATCCATTTGTTCAGCTACAATTCTATGACGTCCATTGCAGTGAGTGAGTCAGAAGCCACAAGCTAACAGGTCTATTCCTTCCCACCGTCACCTTGGAACCCAATGCATCGTCCACAGGAAA	FALSE	0.980835	0.998669	0.983435	1.05917	1.08072	1.03238	1.10538	1.10971	1.10372	0.886625	1.12535	0.951597	0.983738	0.929158	0.998749	1.03168	0.910713	0.912008	1.17394	1.1319	1.09658
inducibleMutant_.If.872240783_mm_chr7:130920632$scrCREB5_scrCREB5at46^scrCREB5_scrCREB5at-45^RFX5_RFX5at33^scrRFX5_scrRFX5at41^scrRFX5_scrRFX5at49^scrCREB5_scrCREB5at55_1	3796	3900	1817	3001	6789	2997	6609	2894	4689	4645	6810	3451	4859	4561	4174	11076	7151	7490	5386	3736	3939	7171	3684	5082	2869	7070	ACATACTTATTATCAGCATCCATTTGTTCAGCTACAATTCTATGACGTCCATTGCAGTGAGTGAGTCAGAAGCCACAAGCTAACAGGTCTATTCCTTCCCACCGTCACCTTGGAATGGTTACGTAGTTCCACAGGAAA	FALSE	1.12908	1.05686	1.08285	1.02253	1.09459	1.01774	1.32445	1.61877	1.56155	0.993173	1.16579	0.998311	1.15005	1.08965	1.10735	1.02968	1.12003	1.14812	1.38308	1.44152	1.37928
inducibleMutant_.i2.-1656764503_mm_chr7:130920632$scrRFX5_scrRFX5at41^scrCREB5_scrCREB5at-45^RFX5_RFX5at33^scrCREB5_scrCREB5at46^scrRFX5_scrRFX5at49^scrCREB5_scrCREB5at55_1	1841	2209	820	3300	6327	3589	2944	1202	1864	2083	3236	1850	2372	1989	2007	4430	3238	3924	2949	2613	1447	2538	1372	2138	1169	2740	ACATACTTATTATCAGCATCCATTTGTTCAGCTACAATTCTATGACGTCCATTGCAGTGAGTGAGTCAGAAGCCACAAGCTAACAGGTCTATTCCTTCCCACCGTCACCTTGGTAACCAATCCATCATCCACAGGAAA	FALSE	1.2303	1.29918	1.21217	0.973886	0.9978	1.04656	3.2695	3.38668	4.19799	1.08131	1.48234	1.0114	1.10947	1.01811	0.984105	0.86738	0.909007	0.980496	1.66157	1.8099	2.21213
inducibleMutant_.ip.-962789800_mm_chr7:130920632$RFX5_RFX5at33^scrCREB5_scrCREB5at-45^scrRFX5_scrRFX5at41^scrCREB5_scrCREB5at46^scrRFX5_scrRFX5at49^scrCREB5_scrCREB5at55_1	3469	4149	1900	7231	14617	8548	3738	2336	3366	3705	7140	3715	5348	2995	3028	6003	4683	8688	5838	4958	2425	4482	2180	3778	2179	5434	ACATACTTATTATCAGCATCCATTTGTTCAGCTACAATTCTATGACGTCCATTGCAGTGAGTGAGTCAGAAGCCACAAGCTAACAGGTCTATTCCTTCCCACCGTTGCCATGGCAACGAATGCATCATCCACAGGAAA	FALSE	1.80277	1.73258	1.815	1.25694	1.1966	1.23624	5.64241	6.16217	7.87465	1.60472	2.19277	1.8457	1.30199	1.26031	1.29613	0.965363	1.06607	1.03463	2.44314	2.37948	2.7875
inducibleMutant_.If.-1701135703_mm_chr7:130920632$RFX5_RFX5at33^scrCREB5_scrCREB5at-45^scrRFX5_scrRFX5at41^scrCREB5_scrCREB5at46^scrRFX5_scrRFX5at49^scrCREB5_scrCREB5at55_1	1137	1026	434	1070	1945	1078	1769	893	1438	1610	1789	1069	1550	1408	1250	2858	1937	2755	1902	1305	1456	2109	1078	1425	862	2066	ACATACTTATTATCAGCATCCATTTGTTCAGCTACAATTCTATGACGTCCATTGCAGTGAGTGAGTCAGAAGCCACAAGCTAACAGGTCTATTCCTTCCCACGCAGTGGAACCTTTGGAATGCATCATCCACAGGAAA	FALSE	0.960828	1.06049	1.11895	1.02209	1.0874	1.1427	1.76426	1.73263	2.09844	1.11139	1.1458	0.890858	1.04461	1.06053	1.04822	1.23292	1.06705	1.08829	1.64795	1.64901	1.56068
inducibleMutant_.i1.1452992416_mm_chr7:130920632$scrCREB5_scrCREB5at-45^RFX5_RFX5at33^scrRFX5_scrRFX5at41^scrCREB5_scrCREB5at46^scrRFX5_scrRFX5at49^scrCREB5_scrCREB5at55_1	1337	1692	679	3127	5742	3704	2139	889	1569	1452	3214	1624	2280	1542	1455	3260	2298	5285	3406	3091	1161	2009	1092	2010	1218	3028	ACATACTTATTATCAGCATCCATTTGTTCGGCTACAATTCTATGACGTCCATTGCAGTGAGTGAGTCAGAAGCCACAAGCTAACAGGTCTATTCCTTCCCACCGTCACCTTGGAAACCAATGCATCATCCACAGGAAA	FALSE	1.57616	1.47107	1.50291	0.929086	1.08336	0.941007	4.26405	4.23026	5.96302	1.08082	1.56271	1.15267	1.34541	1.3683	1.4028	0.897684	0.928124	1.00662	2.88659	2.69634	3.37536
activeMutant_.ip.2071545152_mm_chr7:104100015$scrCREB5_scrCREB5at-38^scrRFX5_scrRFX5at-6^CREB5_CREB5at24_1	1374	1259	755	926	1893	1083	1785	1188	2149	2193	1818	1013	1399	887	1420	3764	2695	2329	1862	1250	1821	2676	1759	1290	870	1913	ACCGCCCCTACCGGTGCGGCGCCTCACGAGCAACCCTCAAGGTTCACGCATGCTCAGACTCCACCCAGCGTGATGACGGAAGAGCGAGCACGGGGTGACGTAGCTCAGTTGCAACGTGCTTTAAGTCTGGGTCTGCAC	FALSE	1.54992	1.59521	1.60316	2.1584	2.57956	2.47073	1.51314	1.67119	2.08928	1.33101	1.39341	1.53587	1.5011	1.69907	1.5407	2.44772	2.14918	2.81883	2.21142	2.56254	2.37297
activeMutant_.If.1655570966_mm_chr7:104100015$scrCREB5_scrCREB5at-38^scrRFX5_scrRFX5at-6^CREB5_CREB5at24_1	5371	5455	3633	3517	7748	4636	8503	6567	9953	11101	9241	4893	6684	3764	6039	13607	12945	6744	7124	5608	9465	14542	8830	6351	3874	8661	ACCGCCCCTACCGGTGCGGCGCCTCACGAGCAGGGCCTGTGTTTCACGCATGCTCAGACTCCACCCAGCGTGATGACGGAAGAGCGAGCACGGGGTGACGTAGCTCAGTTGCAACGTGCTTTAAGTCTGGGTCTGCAC	FALSE	1.85655	1.81576	1.80497	2.81162	2.81538	2.94729	1.20644	1.43593	1.87749	1.09224	1.2674	1.55146	1.74155	1.7829	1.64378	2.9981	2.75223	3.33455	1.50901	2.31041	2.50879
activeMutant_.i2.-723662632_mm_chr7:104100015$scrCREB5_scrCREB5at-38^scrRFX5_scrRFX5at-6^CREB5_CREB5at24_1	173	74	56	100	203	123	158	85	111	129	245	70	155	77	71	260	304	122	136	61	102	192	94	135	83	161	ACCGCCCCTACCGGTGCGGCGCCTCACGAGCCCCCGGACACAGTCACGCATGCTCAGACTCCACCCAGCGTGATGACGGAAGAGCGAGCACGGGGTGACGTAGCTCAGTTGCAACGTGCTTTAAGTCTGGGTCTGCAC	FALSE	2.4061	1.26981	2.04608	1.77896	1.53485	1.67421	1.84607	2.02467	2.68074	1.89332	0.925262	1.287	1.80961	1.86726	1.49369	1.57937	1.77632	1.73526	1.33442	2.15607	1.33397
activeMutant_.ip.34976744_mm_chr7:104100015$CREB5_CREB5at24^scrCREB5_scrCREB5at-38^scrRFX5_scrRFX5at-6_1	2870	2879	1753	2189	4323	2637	4532	3110	5090	5706	4657	2790	3563	2047	2848	7031	6428	4315	4146	3077	4801	7417	4473	3235	1950	4770	ACCGCCCCTACCGGTGCGGCGCCTCACGAGCTCCCGGACACAATCACGCATGCTCAGACTCCACCCAGCGTGATGACGGAAGAGCGAGCACGGAATGACGTCACCCAGTTGCAACGTGCTTTAAGTCTGGGTCTGCAC	FALSE	1.72039	1.90379	1.76921	2.44839	2.64748	2.78564	1.40884	1.50318	2.00367	1.09503	1.25499	1.40455	1.63117	1.65019	1.66466	2.79634	2.58119	3.10604	1.77537	2.47244	2.53113
activeMutant_.If.1656514988_mm_chr7:104100015$CREB5_CREB5at24^scrCREB5_scrCREB5at-38^scrRFX5_scrRFX5at-6_1	323	388	216	268	677	296	936	428	733	704	647	334	388	377	394	945	1092	671	452	527	597	997	590	443	266	660	ACCGCCCCTACCGGTGCGGCGCCTCACGAGCTCCCGGACACAATCACGCATGCTCAGACTCCACCCAGCGTGATGACGGAAGAGCGAGCACGGCCACTGCATCGACAGTTGCAACGTGCTTTAAGTCTGGGTCTGCAC	FALSE	1.29778	1.23748	1.0461	1.82954	2.07012	1.86613	0.83515	1.1398	1.08899	0.596707	0.818928	0.837962	1.21284	1.22224	1.25063	1.88803	1.88393	2.22453	1.49901	1.46356	2.35383
activeMutant_.i2.1234838180_mm_chr7:104100015$CREB5_CREB5at24^scrCREB5_scrCREB5at-38^scrRFX5_scrRFX5at-6_1	1576	1506	875	856	2110	1120	3215	1639	2604	2707	2267	1269	1731	1352	1664	3663	3425	2083	1709	1340	2336	3628	2245	1607	946	2398	ACCGCCCCTACCGGTGCGGCGCCTCACGAGCTCCCGGACACAATCACGCATGCTCAGACTCCACCCAGCGTGATGACGGAAGAGCGAGCACGGGGGGCCGTAGCTCAGTTGCAACGTGCTTTAAGTCTGGGTCTGCAC	FALSE	1.26798	1.31104	1.30137	1.95362	2.05067	2.00089	0.776602	1.03423	1.19962	0.847636	0.925409	0.988265	1.22682	1.21208	1.26706	2.06002	1.91162	2.3603	1.29759	1.54305	1.66891
activeMutant_.i1.310220512_mm_chr7:104100015$CREB5_CREB5at24^scrCREB5_scrCREB5at-38^scrRFX5_scrRFX5at-6_1	745	660	384	362	779	536	1121	618	987	1128	792	488	568	596	699	1642	1419	682	825	576	711	1329	840	628	398	869	ACCGCCCCTACCGGTGCGGCGCCTCACGAGCTCCCGGACACAATCACGCATGCTCAGACTCCACCCAGCGTGATGACGGAAGAGCGAGCACGGGGTGACGGACCTCAGTTGCAACGTGCTTTAAGTCTGGGTCTGCAC	FALSE	1.00489	1.14368	0.968688	1.67102	1.76321	1.89136	0.941908	1.09508	1.64651	1.14917	1.16313	1.24386	1.08757	1.15679	1.0416	1.42233	1.58851	2.00336	0.963747	1.68975	1.62735
active_.chr7:104100015_base_active_1	4228	3926	2387	3193	6877	3464	7939	6111	10269	11088	8592	5229	6695	3414	3915	9634	9438	5897	5421	4028	9052	14202	8777	6136	3903	9268	ACCGCCCCTACCGGTGCGGCGCCTCACGAGCTCCCGGACACAATCACGCATGCTCAGACTCCACCCAGCGTGATGACGGAAGAGCGAGCACGGGGTGACGTAGCTCAGTTGCAACGTGCTTTAAGTCTGGGTCTGCAC	FALSE	1.90313	2.13938	1.99328	2.88461	3.20256	3.24564	1.17311	1.36505	1.50251	0.920881	0.976955	1.09177	1.85509	1.9804	1.93931	3.16123	2.96344	3.65434	1.45476	1.93834	1.9867
activeMutant_.i2.-2035037824_mm_chr7:104100015$scrRFX5_scrRFX5at-6^scrCREB5_scrCREB5at-38^CREB5_CREB5at24_1	973	1040	614	757	1695	961	1781	897	1477	1541	1142	712	1034	675	1054	2593	2587	1590	1060	956	1324	2041	1012	865	516	1263	ACCGCCCCTACCGGTGCGGCGCCTCACGAGCTCCCGGACACAATCACGCATGCTCAGACTCCACCCTGCGTGATCACGGAAGAGCGAGCACGGGGTGACGTAGCTCAGTTGCAACGTGCTTTAAGTCTGGGTCTGCAC	FALSE	1.27938	1.47336	1.55704	2.14155	2.32975	2.28144	1.23976	1.49976	1.85809	0.944677	1.15361	1.25185	1.32268	1.32423	1.33667	2.33862	2.15402	2.1311	1.98389	1.91697	2.38484
activeMutant_.ip.1014630854_mm_chr7:104100015$scrRFX5_scrRFX5at-6^scrCREB5_scrCREB5at-38^CREB5_CREB5at24_1	2919	2477	1524	1436	3526	1809	5798	2816	4597	5019	5260	2845	4053	3183	3014	6768	5656	3737	2973	2308	3936	6541	3298	3899	2460	5811	ACCGCCCCTACCGGTGCGGCGCCTCACGAGCTCCCGGACACAATCACGCATGCTCAGACTCCACCGAGAGTGATGCTCCAAGAGCGAGCACGGGGTGACGTAGCTCAGTTGCAACGTGCTTTAAGTCTGGGTCTGCAC	FALSE	1.24965	1.24847	1.29426	1.42572	1.5377	1.57576	0.722407	0.958338	1.0744	0.870543	0.843991	0.95445	1.26433	1.3388	1.30419	1.47433	1.46392	1.47279	0.988806	1.14018	1.22097
activeMutant_.i1.-567333024_mm_chr7:104100015$scrRFX5_scrRFX5at-6^scrCREB5_scrCREB5at-38^CREB5_CREB5at24_1	1322	1351	874	842	1741	979	2760	1231	2102	2140	2069	1208	1579	1252	1281	2937	3193	1680	1513	1094	1791	3179	1731	1389	909	2257	ACCGCCCCTACCGGTGCGGCGCCTCACGAGCTCCCGGACACAATCACGCATGCTCAGACTCCAGCCAGCGTGAAGACGGAAGAGCGAGCACGGGGTGACGTAGCTCAGTTGCAACGTGCTTTAAGTCTGGGTCTGCAC	FALSE	1.24967	1.3477	1.28192	1.5845	1.78756	1.70813	0.889833	0.994041	1.22146	0.828241	0.967022	1.14987	1.14509	1.2577	1.28781	1.70556	1.80882	1.96526	1.13013	1.47519	1.47136
activeMutant_.If.-523709328_mm_chr7:104100015$scrRFX5_scrRFX5at-6^scrCREB5_scrCREB5at-38^CREB5_CREB5at24_1	1893	1898	1100	887	2669	1298	4787	1415	2458	2472	2904	1537	2114	2282	1941	4794	4063	2195	2267	1571	2085	3639	1854	2124	1367	3111	ACCGCCCCTACCGGTGCGGCGCCTCACGAGCTCCCGGACACAATCACGCATGCTCAGACTCCAGGGTCGCACTACTGCCAAGAGCGAGCACGGGGTGACGTAGCTCAGTTGCAACGTGCTTTAAGTCTGGGTCTGCAC	FALSE	0.962319	0.940785	0.941611	0.999262	1.14683	1.08254	0.540463	0.878617	0.933722	0.683788	0.78329	0.834403	0.960685	1.0377	0.97389	1.08935	1.136	1.15484	0.810109	1.21269	1.15922
activeMutant_.ip.-125203350_mm_chr10:111971099$CREB5_CREB5at-28_1	680	826	522	526	971	522	787	648	973	897	997	563	883	662	766	1597	1608	1266	761	515	863	1501	789	816	427	1088	ACCTAGCTGCGTCGTTCAGCCAATCGGCAGCTCCAGCCTCTAATGACGTCACCCGTTGCTGGGGCCGGAGGCTGGGTGGGGGGTGGAGCCAGGCTGCAAGCCAGGAAATCTCTGGGAGCTGTAGTGCGGCCAGCTGGT	FALSE	1.13887	1.18791	1.35577	1.57745	1.5649	1.35408	1.94947	1.94428	2.28403	1.49406	2.07346	2.40848	1.27226	1.11734	1.17408	1.55428	1.61522	1.69413	1.61065	1.40327	1.30995
activeMutant_.i2.443578476_mm_chr10:111971099$CREB5_CREB5at-28_1	1459	719	789	997	1793	825	1984	890	1202	1412	2035	1008	1463	1318	1910	1840	3305	2945	1737	1317	1395	1789	1066	1450	786	2064	ACCTAGCTGCGTCGTTCAGCCAATCGGCAGCTCCAGCCTCTTCGGCCGTCACGCGTTGCTGGGGCCGGAGGCTGGGTGGGGGGTGGAGCCAGGCTGCAAGCCAGGAAATCTCTGGGAGCTGTAGTGCGGCCAGCTGGT	FALSE	1.16758	1.06826	1.12826	1.08821	0.971005	1.07061	1.46575	1.42414	1.43192	1.27159	0.715941	1.44405	1.13552	1.03306	1.11872	1.26193	0.966953	1.14966	1.88189	1.60879	1.68258
activeMutant_.i1.1210453986_mm_chr10:111971099$CREB5_CREB5at-28_1	1168	630	613	723	1108	646	1587	739	1237	1416	1837	996	1362	1117	1307	1562	2686	2011	1269	955	1155	2192	1055	1369	765	1711	ACCTAGCTGCGTCGTTCAGCCAATCGGCAGCTCCAGCCTCTTCTGACGGCCCGCGTTGCTGGGGCCGGAGGCTGGGTGGGGGGTGGAGCCAGGCTGCAAGCCAGGAAATCTCTGGGAGCTGTAGTGCGGCCAGCTGGT	FALSE	1.24364	1.24548	1.23938	1.06618	1.1791	1.26684	1.32882	1.10021	1.40172	1.27262	0.784248	1.40259	1.26501	1.18638	1.09426	1.23283	1.39797	1.34254	1.51629	1.38683	1.43965
active_.chr10:111971099_base_active_1	1884	1991	1160	1385	2971	1553	2850	1226	1885	1985	2916	1611	2093	1529	2098	3956	4270	3379	2502	1917	2014	2979	1537	1985	1180	2889	ACCTAGCTGCGTCGTTCAGCCAATCGGCAGCTCCAGCCTCTTCTGACGTCACGCGTTGCTGGGGCCGGAGGCTGGGTGGGGGGTGGAGCCAGGCTGCAAGCCAGGAAATCTCTGGGAGCTGTAGTGCGGCCAGCTGGT	FALSE	1.44218	1.4717	1.39137	1.29218	1.31261	1.29737	1.41746	1.64275	1.87643	1.14306	1.38012	1.47795	1.33997	1.33688	1.34979	1.57046	1.38795	1.42887	1.86125	1.99753	2.11115
active_.chr5:140700424_base_active_1	2293	85	1360	822	1620	246	773	3308	5067	5509	3042	1609	2170	1528	2397	355	3783	1983	1357	1210	4937	7595	4428	2046	1247	2887	ACGTCGCGACGCGGGGCGGGAGGCGGCTGTGAGTGACAGCCCCTCCGGGCGGAAGGGCGGAGCCCCAGCTAGCGCAGGCGCAATAGCGCAATTACGCTGCCCAGCGTGAAACTCATCTTTTCGCGAGAACTTGTTTTT	FALSE	1.50548	1.47084	1.44351	3.48884	3.53069	3.60297	3.10169	3.30256	1.09588	5.12931	0.217235	6.3886	1.38205	1.41371	1.34974	3.85226	3.54091	4.11918	1.09301	1.0841	1.33342
activeMutant_.i2.309506747_mm_chr5:140700424$scrRFX5_scrRFX5at30_1	6683	196	3676	2402	5097	652	1815	10107	15038	17161	8076	4369	5765	2899	6798	876	10831	4803	4033	3372	14976	23193	13163	5723	3477	8449	ACGTCGCGACGCGGGGCGGGAGGCGGCTGTGAGTGACAGCCCCTCCGGGCGGAAGGGCGGAGCCCCAGCTAGCGCAGGCGCAATAGCGCAATTACGCTGCCCTGCGTGAACCTCATCTTTTCGCGAGAACTTGTTTTT	FALSE	2.10662	2.10507	2.02131	5.6184	5.52299	5.91569	3.86013	4.4254	1.23702	6.36692	0.213339	7.35437	2.03759	2.07765	2.08201	6.15919	5.69927	6.45407	1.39537	1.69822	1.9586
activeMutant_.ip.307657281_mm_chr5:140700424$scrRFX5_scrRFX5at30_1	4899	159	2749	2020	3525	624	1736	8900	13084	14514	8924	5104	6232	2728	4754	598	8337	3567	3143	2438	13293	20127	11159	6279	3895	8736	ACGTCGCGACGCGGGGCGGGAGGCGGCTGTGAGTGACAGCCCCTCCGGGCGGAAGGGCGGAGCCCCAGCTAGCGCAGGCGCAATAGCGCAATTACGCTGCCGAGAGTGATGCTCCTCTTTTCGCGAGAACTTGTTTTT	FALSE	2.47374	2.61336	2.32202	5.25756	5.10656	5.31684	3.39396	3.19981	1.23777	4.87969	0.180941	5.75005	2.37568	2.47332	2.28767	5.80971	5.25587	5.81444	1.10124	1.40642	1.50486
activeMutant_.i1.-1272753676_mm_chr5:140700424$scrRFX5_scrRFX5at30_1	2161	77	1145	839	1550	212	740	3617	5370	5689	3203	1984	2387	1149	1861	258	3610	1596	1153	978	5251	7623	4273	2351	1426	3184	ACGTCGCGACGCGGGGCGGGAGGCGGCTGTGAGTGACAGCCCCTCCGGGCGGAAGGGCGGAGCCCCAGCTAGCGCAGGCGCAATAGCGCAATTACGCTGGCCAGCGTGAAACTCATCTTTTCGCGAGAACTTGTTTTT	FALSE	2.10802	2.41187	2.11161	5.07303	4.97607	4.94796	3.30701	3.30077	0.98653	5.0496	0.205565	5.6185	2.11191	2.14989	1.97961	5.44876	4.72624	5.28615	1.16987	1.22496	1.43326
activeMutant_.If.-1618499303_mm_chr5:140700424$scrRFX5_scrRFX5at30_1	6580	241	3690	2627	5186	810	2905	8795	11779	13114	10281	5877	7396	4577	7140	842	11491	5297	4179	3518	12833	18905	10379	7788	4740	10389	ACGTCGCGACGCGGGGCGGGAGGCGGCTGTGAGTGACAGCCCCTCCGGGCGGAAGGGCGGAGCCCCAGCTAGCGCAGGCGCAATAGCGCAATTACGCTGGGGTCGCACTTTGAGTTCTTTTCGCGAGAACTTGTTTTT	FALSE	1.69861	1.79352	1.64247	3.09666	2.74006	2.86329	2.63766	2.8132	0.960163	3.91664	0.163893	4.6124	1.75625	1.79397	1.62151	3.3429	2.94243	3.2233	0.974706	1.11457	1.29426
activeMutant_.ip.-1086373817_mm_chr9:64101595$scrCREB5_scrCREB5at-40^CREB5_CREB5at-43_1	2420	1949	913	1537	2298	878	5945	2168	3499	3537	4799	2465	3406	3590	1975	4635	3350	2844	1793	1190	3162	5022	2543	3435	2092	4925	ACTAGCCTCAGAGGCAGATGACGCGGAAAAACCCTCAAGGTGGCGCGGCGCATTGGCTTGGGGCGGAGTTAAAGGGAGGCTTTCCGGGCGCCCTCTGCTGACCAGCGGTATCCAGGTGGCTGCTGTACGAGGTTCTTG	FALSE	1.01087	0.95908	0.964344	0.973203	1.03772	0.984581	0.754098	0.609134	0.508568	0.703879	0.647664	0.557655	0.987585	1.00945	0.980026	1.05013	0.996535	1.00688	0.667206	0.609677	0.558159
activeMutant_.If.-1035185776_mm_chr9:64101595$scrCREB5_scrCREB5at-40^CREB5_CREB5at-43_1	2099	2147	1187	1665	2760	1138	6285	2308	3586	3798	5513	2933	3779	4119	2218	6086	3910	3585	2191	1679	3056	5310	2494	3670	2132	5161	ACTAGCCTCAGAGGCAGATGACGCGGAAAATGCAGTGCCCTGGCGCGGCGCATTGGCTTGGGGCGGAGTTAAAGGGAGGCTTTCCGGGCGCCCTCTGCTGACCAGCGGTATCCAGGTGGCTGCTGTACGAGGTTCTTG	FALSE	1.01213	0.994609	0.932539	0.902989	0.926939	0.921454	0.772707	0.69202	0.62351	0.577486	0.674865	0.685791	0.919637	0.896628	0.895092	0.88458	0.91836	0.860659	0.733031	0.649329	0.686379
activeMutant_.i2.-1241921482_mm_chr9:64101595$scrCREB5_scrCREB5at-40^CREB5_CREB5at-43_1	3877	4364	3070	2766	5269	2657	8855	2425	3693	4052	5131	2763	3856	3000	3416	8901	9261	6006	4601	3700	3413	5457	2921	4038	2385	5873	ACTAGCCTCAGAGGCAGATGACGCGGAAACACGTCACGGGGGGCGCGGCGCATTGGCTTGGGGCGGAGTTAAAGGGAGGCTTTCCGGGCGCCCTCTGCTGACCAGCGGTATCCAGGTGGCTGCTGTACGAGGTTCTTG	FALSE	1.29336	1.28645	1.30646	1.30265	1.31066	1.34977	0.911107	0.937679	1.03326	0.75708	0.973612	1.25891	1.38927	1.37716	1.39851	1.35641	1.29582	1.384	1.68612	1.87217	2.07676
activeMutant_.i1.1435990402_mm_chr9:64101595$CREB5_CREB5at-43^scrCREB5_scrCREB5at-40_1	3289	2780	1466	1979	3093	1423	10796	2587	3837	4126	5568	3072	4070	4126	2911	7322	4684	4419	2527	2124	3483	5755	3055	4011	2536	5619	ACTAGCCTCAGAGGCAGATGACGCGGAAATACGGCCCGGGAGGCGCGGCGCATTGGCTTGGGGCGGAGTTAAAGGGAGGCTTTCCGGGCGCCCTCTGCTGACCAGCGGTATCCAGGTGGCTGCTGTACGAGGTTCTTG	FALSE	1.02049	1.03998	1.00264	1.01043	0.990136	0.999334	0.534673	0.451473	0.453888	0.526787	0.508712	0.49308	1.00338	1.06472	0.972871	1.00647	0.993634	1.05247	0.902027	0.747636	0.866823
active_.chr9:64101595_base_active_1	34722	33942	23387	21356	35669	18692	73992	21983	34360	35872	44920	25615	34125	26785	27837	75483	63560	43443	29748	25278	29281	47395	25438	32582	20196	47501	ACTAGCCTCAGAGGCAGATGACGCGGAAATACGTCACGGGAGGCGCGGCGCATTGGCTTGGGGCGGAGTTAAAGGGAGGCTTTCCGGGCGCCCTCTGCTGACCAGCGGTATCCAGGTGGCTGCTGTACGAGGTTCTTG	FALSE	1.2682	1.33578	1.29498	1.32262	1.36582	1.33837	0.841862	0.759663	0.869916	0.811436	0.906239	1.14772	1.25553	1.30614	1.26688	1.30338	1.26052	1.34995	1.36601	1.35575	1.58912
activeMutant_.i1.-1572092535_mm_chr9:64101595$scrCREB5_scrCREB5at-40^CREB5_CREB5at-43_1	27094	26040	16591	19318	35583	17537	71896	20685	30634	33095	43303	23802	31969	29021	23015	63415	50784	37326	25249	20553	27888	45858	23364	31116	18317	44384	ACTAGCCTCAGAGGCAGATGACGCGGAAATACGTGACGGGAGGCGCGGCGCATTGGCTTGGGGCGGAGTTAAAGGGAGGCTTTCCGGGCGCCCTCTGCTGACCAGCGGTATCCAGGTGGCTGCTGTACGAGGTTCTTG	FALSE	1.12835	1.1456	1.11969	1.14863	1.12389	1.13962	0.783724	0.779924	0.839957	0.651633	0.715527	0.837943	1.10666	1.09335	1.09255	1.14573	1.12568	1.14436	1.08324	1.06205	1.19253
activeMutant_.i2.167003781_mm_chr9:64101595$CREB5_CREB5at-43^scrCREB5_scrCREB5at-40_1	7526	7087	4969	4893	8632	4493	18071	4570	6813	7329	9205	4907	6951	6084	6911	16212	16179	10627	7186	5907	6045	9782	5079	6883	3957	9153	ACTAGCCTCAGAGGCAGATGACGCGGAAGTCCGTCACGGGAGGCGCGGCGCATTGGCTTGGGGCGGAGTTAAAGGGAGGCTTTCCGGGCGCCCTCTGCTGACCAGCGGTATCCAGGTGGCTGCTGTACGAGGTTCTTG	FALSE	1.14412	1.12657	1.16129	1.2105	1.19229	1.20383	0.789766	0.752738	0.856171	0.720139	0.774765	0.998466	1.1677	1.12666	1.07473	1.18463	1.14538	1.18663	1.47111	1.44182	1.63487
activeMutant_.ip.-201042359_mm_chr9:64101595$CREB5_CREB5at-43^scrCREB5_scrCREB5at-40_1	2398	2429	1835	1451	2759	1644	3969	1837	2834	3088	3791	1993	2739	1852	2146	5128	5234	3395	2367	1910	2272	3815	2046	2702	1536	3863	ACTAGCCTCAGAGGCAGATGACGCGGAATGACGTCACCGGAGGCGCGGCGCATTGGCTTGGGGCGGAGTTAAAGGGAGGCTTTCCGGGCGCCCTCTGCTGACCAGCGGTATCCAGGTGGCTGCTGTACGAGGTTCTTG	FALSE	1.54793	1.50314	1.50326	1.59848	1.62926	1.66628	1.06633	1.09543	1.42635	1.04473	1.20903	1.67881	1.50587	1.4367	1.49008	1.46266	1.46745	1.57033	1.54392	1.56017	1.73659
activeMutant_.If.-2044722960_mm_chr9:64101595$CREB5_CREB5at-43^scrCREB5_scrCREB5at-40_1	3175	3213	1853	1984	3292	1574	7138	2665	3927	4161	5524	2849	3921	4236	3060	7065	5862	4095	2942	1950	3485	5601	2881	3885	2478	5769	ACTAGCCTCAGAGGCAGATGACGCGGTTTATGCAGTGCGGAGGCGCGGCGCATTGGCTTGGGGCGGAGTTAAAGGGAGGCTTTCCGGGCGCCCTCTGCTGACCAGCGGTATCCAGGTGGCTGCTGTACGAGGTTCTTG	FALSE	0.986134	0.939439	0.940855	1.01386	0.987046	0.981641	0.81072	0.726772	0.759337	0.769133	0.88925	0.942639	0.946624	1.01336	0.972904	0.980895	0.941933	0.96675	0.814184	0.847815	0.775147
RFXrandMutant_.i1.-409293597_mm_chr19:69904017$RFX5_RFX5at-13^CREB5_CREB5at-24^scrRFX5_scrRFX5at24^scrCREB5_scrCREB5at28_1	911	1070	435	435	831	403	1318	580	843	906	1303	748	939	1054	946	2717	1273	1356	608	514	747	1310	727	942	620	1433	ACTTTCAGCTGTGCACCGACATGTTCCCCAGCTCAGCCCCACATCAATGACACCCTTGATTCCATAGTAAGCAAGGGAGAGCGAAGGGGAAAGGGTGTATTGCACTGGGCGAAGGGAATCCAGCCAAAAGGAGCCACA	FALSE	0.93485	0.991273	0.905539	0.886801	0.851568	0.85901	0.962675	0.993574	1.05292	1.19519	1.60383	1.19845	0.922471	1.01899	0.97125	0.844998	0.885403	0.980439	1.08354	0.704169	0.82116
putativeConstitWgoodRFXsite_.chr19:69904017_base_RFX25_great_tiles_from_constitK27_CBP_peaks_1	177	235	122	82	126	69	269	248	384	344	489	240	253	248	266	413	158	287	99	84	322	405	184	200	153	392	ACTTTCAGCTGTGCACCGACATGTTCCCCAGCTCAGCCCCACATCAATGACACCCTTGTTTCCATAGTAACCAAGGGAGAGCGAAGGGGAAAGGGTGTATTGCACTGGGCGAAGGGAATCCAGCCAAAAGGAGCCACA	FALSE	1.49106	1.35174	1.03693	1.61153	1.64859	1.38617	0.889134	0.73813	0.883289	1.13777	1.72586	1.64685	0.832378	1.0687	1.12917	1.54803	1.16336	1.05461	0.974664	0.487301	0.570339
RFXrandMutant_.i1.-1074779024_mm_chr19:69904017$scrCREB5_scrCREB5at28^CREB5_CREB5at-24^RFX5_RFX5at-13^scrRFX5_scrRFX5at24_1	692	579	334	262	731	332	825	246	456	581	649	372	450	759	604	1967	1029	976	545	363	508	602	398	513	299	690	ACTTTCAGCTGTGCACCGACATGTTCCCCAGCTCAGCCCCACATCAATGACACCCTTGTTTCCATAGTAACCAAGGGAGAGCGAAGGGGAAAGGGTGTATTGGACTGGGCGAAGGGAATCCAGCCAAAAGGAGCCACA	FALSE	0.646608	0.684594	0.602633	0.522314	0.639669	0.764971	0.926303	1.3963	1.38577	1.4504	1.38648	1.47007	0.697618	0.682411	0.649431	0.79799	0.565022	0.745363	1.08301	0.876534	0.805323
RFXrandMutant_.If.-1887785853_mm_chr19:69904017$CREB5_CREB5at-24^RFX5_RFX5at-13^scrRFX5_scrRFX5at24^scrCREB5_scrCREB5at28_1	1402	1394	588	781	967	501	1280	840	1217	1365	1466	741	1068	950	1097	3065	1635	1561	793	617	1026	1995	1030	1067	585	1483	ACTTTCAGCTGTGCACCGACATGTTCCCCAGCTCAGCCCCACATCTTACTGTGGGAAGTTTCCATAGTAACCAAGGGAGAGCGAAGGGGAAAGGGTGTATTGCACTGGGCGAAGGGAATCCAGCCAAAAGGAGCCACA	FALSE	1.16694	1.0895	1.14269	1.42493	1.36395	1.43589	1.7797	1.1905	1.34783	1.89397	2.15151	1.66807	1.15927	1.06672	1.11518	1.28765	1.49599	1.54113	1.3839	1.01898	1.09362
inactive_.chr13:103498374_base_inactive_1	10009	10017	4956	6871	11122	5707	14220	4719	7143	7582	10333	5620	6978	7944	12494	23946	20133	17284	11019	8033	6349	10813	5481	7344	4476	10422	AGACGTTTGGGCCTAAGCGCTGGGCGAGGCGAGGCCCTGCCCCTCCCCGCCAACGGCCATTCTCTGGACCTGTCTTTCTTCCGGGAGGCGGTGACAGCTGCTGAGACGTGTTGCAGCCAGAGTCTCTCCGCTTTAATG	TRUE	0.983616	0.988165	0.89284	0.957303	0.957357	0.953795	1.40937	1.23253	1.38202	1.2171	1.39164	1.26555	0.954192	0.97604	0.937211	0.952888	0.969655	0.980725	1.83244	1.69323	1.70272
inactive_.chr9:60685295_base_inactive_1	4242	3753	2016	2351	4488	2022	6621	3375	4905	5327	7490	3854	5363	6114	4628	9851	7059	5779	3909	2922	4449	7983	4052	5460	3103	7994	AGATGGCCCTAAGATTGAAACTGGCTTTAAATACTGTTTTGTTGAATAACCAGATTTGTCTGTCCGCCTCCCACCCCCTGGTCTTCTTGTCACACACTCACACTGACTGTATTGACGTGGTCAGCGTGTTTCACAATG	TRUE	0.926391	0.880478	0.891588	0.889584	0.854173	0.870699	1.0357	1.06818	1.05163	1.10785	1.11981	1.10564	0.921742	0.879171	0.934038	0.867586	0.930146	0.942043	0.796071	0.780467	0.804748
RFXrandMutant_.If.-657571421_mm_chr13:148093370$RFX5_RFX5at-48^scrRFX5_scrRFX5at-27_1	65	63	27	47	46	24	107	73	113	185	176	84	128	231	64	248	78	72	69	45	83	181	110	139	72	245	AGCAAATCTCAGATCTTAGCTGCAAGGATACCTTTGGACGGAGAGGCAGAACACTGAGCCTCATTTTTTTTTTTTTTAACAAATTTTGGGTAAGCCTTTTGTCCCTGAAGCTAAAATGAAAGAACTTGGACCATATCC	FALSE	0.576154	0.507925	0.563222	0.509272	0.520834	0.800333	1.28121	0.677468	0.772385	1.05042	1.16318	0.916276	0.621077	0.53993	0.757669	0.428392	0.558183	0.676873	0.26251	0.364629	0.328024
inactive_.chr19:40972477_base_inactive_1	7153	7999	3360	4335	7955	3902	12795	4136	5837	6353	8928	4698	6321	6875	9050	19307	15263	12033	8500	5811	5504	8920	4394	5948	3530	9053	AGCGGGGCGTGTACGACGTCCGCCGCAGGAGTGTGTAGTATCAGTGTCCGGGTCAGTTACTCGTCGAGTTGTGTGACACGGTGTCGGTGTGTGAGCTTACGGGTCCGCGTGTCTGTGTAGGAATCACGACTGTACACC	TRUE	0.982018	0.954492	0.934534	0.969497	0.903961	0.923457	0.988222	0.979748	1.05015	0.966679	1.23505	0.953554	0.892978	0.889445	0.940688	0.954512	0.924278	0.908477	1.4741	1.50925	1.42326
activeMutant_.ip.-462980668_mm_chr13:51664915$scrCREB5_scrCREB5at-17^scrCREB5_scrCREB5at6^scrRFX5_scrRFX5at49^scrCREB5_scrCREB5at54_1	2401	2377	1015	1505	2435	1291	3863	2011	2877	3074	4010	2042	2921	3408	2434	5560	4164	4036	2663	1930	2413	4192	2236	2571	1628	4270	AGGCAATCCCCTGGGCTCAGGCGGCTTCAGCCAATGAGAGGCTGAGCCGATGAACCCTCAAGGTAAGGCTCGCTCAATAGTGGAAGATTCCATTTCAATCAAGGGCGGGATCTTTTATCCAACAGCAGTGTGGGAAAA	FALSE	0.889781	0.836928	0.871192	0.950936	0.89882	0.901395	1.13636	0.993319	1.15082	1.07474	1.21561	0.954087	0.778654	0.827507	0.895064	0.844177	0.876258	0.932607	0.997416	0.953863	0.953593
activeMutant_.i1.1090786886_mm_chr13:51664915$scrCREB5_scrCREB5at-17^scrCREB5_scrCREB5at6^scrRFX5_scrRFX5at49^scrCREB5_scrCREB5at54_1	777	714	418	417	949	308	1295	739	1282	1227	1365	830	1169	1288	966	1672	1553	1357	837	537	969	1590	877	1072	543	1497	AGGCAATCCCCTGGGCTCAGGCGGCTTCAGCCAATGAGAGGCTGAGCCGATGACTCAGTCAACAAAGGCTCGCTCAATAGTGGAAGATTCCATTTCAATCAAGGGCGGGATCTTTTATCCAACAGCAGTGTGGGAAAA	FALSE	0.80141	0.900108	0.92253	0.924628	1.05975	0.952005	0.93923	1.15481	0.819006	1.03749	1.08923	1.17207	0.859055	0.730299	0.830293	0.896982	0.87941	0.967855	0.887337	0.793275	0.702043
activeMutant_.ip.1957725957_mm_chr13:51664915$scrCREB5_scrCREB5at6^scrCREB5_scrCREB5at-17^scrRFX5_scrRFX5at49^scrCREB5_scrCREB5at54_1	587	616	255	330	560	298	857	588	840	911	1141	517	811	614	821	1238	1198	965	673	449	619	1109	540	774	412	978	AGGCAATCCCCTGGGCTCAGGCGGCTTCAGCCAATGAGAGGCTGAGCCGATGACTCATTCAACAAAGGCTCGCTCAACCCTCAAGGTTTCCATTTCAATCAAGGGCGGGATCTTTTATCCAACAGCAGTGTGGGAAAA	FALSE	1.40526	1.17613	1.34256	1.54329	1.45661	1.48273	1.12315	1.02973	1.19741	1.18438	1.42	1.08045	1.30111	1.16237	1.13788	1.20198	1.28669	1.25012	1.32368	1.33801	1.23136
activeMutant_.i1.2051669060_mm_chr13:51664915$scrCREB5_scrCREB5at6^scrCREB5_scrCREB5at-17^scrRFX5_scrRFX5at49^scrCREB5_scrCREB5at54_1	232	220	158	84	182	88	358	260	445	474	472	255	392	362	259	615	449	354	201	210	341	599	337	344	230	527	AGGCAATCCCCTGGGCTCAGGCGGCTTCAGCCAATGAGAGGCTGAGCCGATGACTCATTCAACAAAGGCTCGCTCAATAGGGCAAGATTCCATTTCAATCAAGGGCGGGATCTTTTATCCAACAGCAGTGTGGGAAAA	FALSE	0.985988	0.983929	1.10068	1.15745	1.30883	1.30852	0.684387	0.80113	0.846459	1.12057	1.21403	1.60258	0.980826	1.10062	1.03999	1.12311	1.17877	1.32327	0.823606	0.6778	0.976823
activeMutant_.ip.-744068791_mm_chr13:51664915$scrCREB5_scrCREB5at54^scrCREB5_scrCREB5at-17^scrCREB5_scrCREB5at6^scrRFX5_scrRFX5at49_1	1602	1718	975	924	1328	747	2273	1320	2230	2335	2667	1399	2153	1879	1720	3676	2902	2450	1662	1059	1888	3382	1660	1943	1192	2729	AGGCAATCCCCTGGGCTCAGGCGGCTTCAGCCAATGAGAGGCTGAGCCGATGACTCATTCAACAAAGGCTCGCTCAATAGTGGAAGATTCCATTTCAATCAAGGGCGGGATCTTTTATCCAACAACCCTCAAGGTAAA	FALSE	1.07333	1.03998	1.16466	1.1321	1.2636	1.24185	1.18571	0.92069	1.13169	1.2187	1.49319	1.55758	1.0673	1.09892	1.03753	1.19798	1.2822	1.25576	1.09816	1.07974	0.949018
activeMutant_.i1.1501477617_mm_chr13:51664915$scrCREB5_scrCREB5at54^scrCREB5_scrCREB5at-17^scrCREB5_scrCREB5at6^scrRFX5_scrRFX5at49_1	2193	1857	1057	1576	2420	1370	5420	2942	4351	4896	6279	3584	4793	4709	2613	5397	4797	3815	2695	2294	3794	6828	3265	4739	2566	6805	AGGCAATCCCCTGGGCTCAGGCGGCTTCAGCCAATGAGAGGCTGAGCCGATGACTCATTCAACAAAGGCTCGCTCAATAGTGGAAGATTCCATTTCAATCAAGGGCGGGATCTTTTATCCAACAGCAGGGCGGGAAAA	FALSE	1.00832	1.06309	1.03457	1.00682	0.983768	1.03902	0.84813	0.703608	0.870417	0.699638	0.676866	0.708145	1.03872	0.943941	1.03235	0.960604	1.03294	0.985556	0.682324	0.698625	0.820295
activeMutant_.i2.1525089039_mm_chr13:51664915$scrCREB5_scrCREB5at54^scrCREB5_scrCREB5at-17^scrCREB5_scrCREB5at6^scrRFX5_scrRFX5at49_1	170	166	123	100	188	115	285	200	349	311	469	258	266	271	186	502	375	300	119	159	288	543	268	306	165	475	AGGCAATCCCCTGGGCTCAGGCGGCTTCAGCCAATGAGAGGCTGAGCCGATGACTCATTCAACAAAGGCTCGCTCAATAGTGGAAGATTCCATTTCAATCAAGGGCGGGATCTTTTATCCAACCGCAGTGTGGGGAAA	FALSE	1.3087	1.32979	0.997687	1.18932	1.37116	1.14684	1.02344	1.03951	1.3895	1.03143	1.15068	1.56714	1.16545	1.05471	1.25213	1.26706	1.42738	1.4057	0.932345	0.536033	0.987946
activeMutant_.If.-1060092574_mm_chr13:51664915$scrCREB5_scrCREB5at54^scrCREB5_scrCREB5at-17^scrCREB5_scrCREB5at6^scrRFX5_scrRFX5at49_1	1216	1067	684	536	951	511	1829	1144	1606	1737	2013	1003	1607	1352	1112	2420	2651	1629	1245	935	1265	2334	1210	1580	918	2014	AGGCAATCCCCTGGGCTCAGGCGGCTTCAGCCAATGAGAGGCTGAGCCGATGACTCATTCAACAAAGGCTCGCTCAATAGTGGAAGATTCCATTTCAATCAAGGGCGGGATCTTTTATCCAACTCGTCACACCCTAAA	FALSE	1.12591	1.03623	1.20815	1.3636	1.26474	1.28391	0.854785	0.819373	0.962085	1.14962	1.1525	1.35797	1.20621	1.1762	1.06416	1.11555	1.2298	1.27214	1.01477	1.12411	1.1645
activeMutant_.i2.1387737698_mm_chr13:51664915$scrRFX5_scrRFX5at49^scrCREB5_scrCREB5at-17^scrCREB5_scrCREB5at6^scrCREB5_scrCREB5at54_1	953	1049	567	597	1256	638	1549	1188	1893	1865	2156	1175	1618	1332	1008	2447	2242	1605	1153	841	1505	2288	1133	1414	915	2157	AGGCAATCCCCTGGGCTCAGGCGGCTTCAGCCAATGAGAGGCTGAGCCGATGACTCATTCAACAAAGGCTCGCTCAATAGTGGAAGATTCCATTTCAATCAAGGGCGGGATCTTTTATCCATCAGCAGTCTGGGAAAA	FALSE	1.224	1.23216	1.23469	1.43731	1.51314	1.39922	1.12416	1.27777	1.41832	1.06384	1.33787	1.32916	1.09569	1.18996	1.15684	1.34713	1.22366	1.20907	1.01484	1.05667	1.06316
activeMutant_.ip.319987148_mm_chr13:51664915$scrRFX5_scrRFX5at49^scrCREB5_scrCREB5at-17^scrCREB5_scrCREB5at6^scrCREB5_scrCREB5at54_1	1855	1728	954	916	1815	905	2695	1639	2710	2603	3396	1891	2367	2060	1964	3979	4004	2301	1840	1398	2289	3768	2059	2559	1476	3468	AGGCAATCCCCTGGGCTCAGGCGGCTTCAGCCAATGAGAGGCTGAGCCGATGACTCATTCAACAAAGGCTCGCTCAATAGTGGAAGATTCCATTTCAATCAAGGGCGGGATCTTTTATCCGAGAGTGATGCTCCAAAA	FALSE	1.24663	1.2822	1.16792	1.28218	1.40067	1.26275	0.991385	1.06129	1.15637	1.1902	1.2667	1.28539	1.28217	1.24118	1.20265	1.32481	1.30303	1.42074	0.94075	1.09035	1.14273
activeMutant_.i1.608266370_mm_chr13:51664915$scrRFX5_scrRFX5at49^scrCREB5_scrCREB5at-17^scrCREB5_scrCREB5at6^scrCREB5_scrCREB5at54_1	3181	3509	1932	1876	3414	1630	5260	3234	4852	5138	6305	3444	4528	4298	3497	8980	6408	5397	3657	2695	4198	7388	3475	4257	2531	6337	AGGCAATCCCCTGGGCTCAGGCGGCTTCAGCCAATGAGAGGCTGAGCCGATGACTCATTCAACAAAGGCTCGCTCAATAGTGGAAGATTCCATTTCAATCAAGGGCGGGATCTTTTATGCAACAGCAGAGTGGGAAAA	FALSE	1.10932	1.11925	1.07083	1.21259	1.20195	1.19464	1.04029	1.0228	1.06711	1.04571	1.31792	1.33373	1.0223	1.0201	1.05328	1.16453	1.22453	1.14925	1.05757	1.03866	1.05584
activeMutant_.If.-1347470159_mm_chr13:51664915$scrRFX5_scrRFX5at49^scrCREB5_scrCREB5at-17^scrCREB5_scrCREB5at6^scrCREB5_scrCREB5at54_1	914	794	418	352	715	319	1142	541	959	893	973	527	724	782	901	1756	1532	949	747	469	703	1357	533	754	454	1082	AGGCAATCCCCTGGGCTCAGGCGGCTTCAGCCAATGAGAGGCTGAGCCGATGACTCATTCAACAAAGGCTCGCTCAATAGTGGAAGATTCCATTTCAATCAAGGGCGGGATCTTTTATGGTTGTCGTCACACCCAAAA	FALSE	0.940902	0.941317	0.941052	1.11488	1.3057	1.14118	0.899047	0.986631	0.961902	1.38393	1.37355	1.3291	0.995192	1.00569	0.98843	1.07183	1.23618	0.968829	1.02208	1.16608	1.00988
activeMutant_.i2.-1587537137_mm_chr13:51664915$scrCREB5_scrCREB5at6^scrCREB5_scrCREB5at-17^scrRFX5_scrRFX5at49^scrCREB5_scrCREB5at54_1	354	365	172	181	207	161	526	367	642	694	923	413	556	444	366	900	651	417	283	171	560	688	380	556	361	786	AGGCAATCCCCTGGGCTCAGGCGGCTTCAGCCAATGAGAGGCTGAGCCGATGACTCATTCAACAAAGGCTCGCTCCATAGTGGAAGGTTCCATTTCAATCAAGGGCGGGATCTTTTATCCAACAGCAGTGTGGGAAAA	FALSE	1.57202	1.29927	1.27284	1.33205	1.53952	1.56202	1.00369	0.620154	1.05401	1.16373	1.37087	1.18738	1.29251	1.40845	1.26463	1.50377	1.10386	1.21654	0.791002	0.778068	0.648513
activeMutant_.If.920636229_mm_chr13:51664915$scrCREB5_scrCREB5at6^scrCREB5_scrCREB5at-17^scrRFX5_scrRFX5at49^scrCREB5_scrCREB5at54_1	588	613	264	356	633	472	899	551	742	960	1075	584	742	1003	814	1490	1074	845	788	498	654	1160	569	678	462	1146	AGGCAATCCCCTGGGCTCAGGCGGCTTCAGCCAATGAGAGGCTGAGCCGATGACTCATTCAACAAAGGCTCGCTCTTATCACCTTCTTTCCATTTCAATCAAGGGCGGGATCTTTTATCCAACAGCAGTGTGGGAAAA	FALSE	0.810486	0.813287	0.751943	0.885298	0.787654	0.956491	1.15504	1.10958	1.80796	1.13097	1.34707	1.06633	0.697704	0.797917	0.816224	0.777414	0.823886	0.806377	0.709546	0.959046	0.836053
activeMutant_.i2.1753545239_mm_chr13:51664915$scrCREB5_scrCREB5at-17^scrCREB5_scrCREB5at6^scrRFX5_scrRFX5at49^scrCREB5_scrCREB5at54_1	130	104	36	74	125	68	314	134	230	262	413	226	283	186	218	219	122	162	153	98	200	427	251	340	168	358	AGGCAATCCCCTGGGCTCAGGCGGCTTCAGCCAATGAGAGGCTGAGCCGATGCCTCATTCAACGAAGGCTCGCTCAATAGTGGAAGATTCCATTTCAATCAAGGGCGGGATCTTTTATCCAACAGCAGTGTGGGAAAA	FALSE	1.6791	1.69718	1.54652	1.161	1.31658	1.40766	0.687397	0.627329	0.745737	0.715893	0.654325	0.416312	1.88672	1.56464	1.37498	1.28201	1.6354	1.91817	0.733545	1.00414	0.887194
activeMutant_.If.843402747_mm_chr13:51664915$scrCREB5_scrCREB5at-17^scrCREB5_scrCREB5at6^scrRFX5_scrRFX5at49^scrCREB5_scrCREB5at54_1	569	571	306	442	847	338	1149	561	952	1041	1179	696	933	1111	741	1807	1101	952	765	441	735	1298	665	1016	536	1316	AGGCAATCCCCTGGGCTCAGGCGGCTTCAGCCAATGAGAGGCTGAGCCGATGTGAGTAAGTTGTAAGGCTCGCTCAATAGTGGAAGATTCCATTTCAATCAAGGGCGGGATCTTTTATCCAACAGCAGTGTGGGAAAA	FALSE	0.802487	0.875039	0.85359	0.813743	0.912337	0.93637	1.12204	1.16166	1.01298	0.856301	0.981761	0.967048	0.943891	0.835733	0.846189	0.788767	0.832283	0.850813	0.721685	0.840546	0.66839
inducibleMutant_.ip.-527020200_mm_chr11:74986755$scrRFX5_scrRFX5at-15^CREB5_CREB5at15^CREB5_CREB5at31_1	1263	251	643	2487	5064	3003	1414	1863	2710	3264	5066	2772	3986	2910	1502	678	2958	5336	4547	3146	2416	4119	1956	3557	2176	5510	AGGCGGGGGCGGGGCTTCGATCAGGCCGCCCCGCCCTACCCCCACCGCTCCCCACCGAGAGTGATGCTCCCCCGCTGGGACATCTTTGACGTCACAGGACTCTGACGTCACGGTCGCGTGTCTGTCCGCGCGCGCTTG	FALSE	1.31647	1.33055	1.39228	1.03171	0.991537	1.1209	5.13017	5.64364	7.31328	1.5445	0.350683	1.65123	1.26163	1.29534	1.35265	0.989873	1.00834	0.955438	1.54436	1.90742	1.82042
inducibleMutant_.If.1191715908_mm_chr11:74986755$CREB5_CREB5at15^scrRFX5_scrRFX5at-15^CREB5_CREB5at31_1	316	38	167	235	654	162	389	1308	1852	1921	2437	1271	1877	1668	459	82	929	624	469	354	1563	2598	1232	1838	1141	2553	AGGCGGGGGCGGGGCTTCGATCAGGCCGCCCCGCCCTACCCCCACCGCTCCCCACCGCCGGAAATGCCTCCCCGCTGGGACATCAAACTGCAGTGTGGACTCTGACGTCACGGTCGCGTGTCTGTCCGCGCGCGCTTG	FALSE	1.10484	1.06434	1.1438	1.26372	1.18216	1.15091	1.76207	2.64937	1.43407	1.40466	0.192985	1.55888	1.13734	1.18497	1.0934	1.11722	1.10957	1.04988	0.315075	0.343235	0.357365
inducibleMutant_.i2.-115001792_mm_chr11:74986755$CREB5_CREB5at15^scrRFX5_scrRFX5at-15^CREB5_CREB5at31_1	521	63	265	446	978	129	295	1541	2155	2427	3157	1774	2308	2099	617	157	1391	912	613	652	2129	3033	1626	2174	1320	3362	AGGCGGGGGCGGGGCTTCGATCAGGCCGCCCCGCCCTACCCCCACCGCTCCCCACCGCCGGAAATGCCTCCCCGCTGGGACATCTTGGCCGTCACAGGACTCTGACGTCACGGTCGCGTGTCTGTCCGCGCGCGCTTG	FALSE	1.13737	1.18052	1.11765	1.18312	1.09312	1.15549	4.4098	5.22434	1.50582	3.05387	0.421899	3.2619	1.06903	1.08938	1.14422	1.20931	1.02937	1.10112	0.365938	0.356502	0.523047
inducibleMutant_.i2.900782818_mm_chr11:74986755$scrRFX5_scrRFX5at-15^CREB5_CREB5at15^CREB5_CREB5at31_1	213	57	103	422	821	464	310	362	668	588	1108	594	861	716	337	146	533	909	762	626	525	924	484	887	479	1061	AGGCGGGGGCGGGGCTTCGATCAGGCCGCCCCGCCCTACCCCCACCGCTCCCCACCGTCGGAAATCCCTCCCCGCTGGGACATCTTTGACGTCACAGGACTCTGACGTCACGGTCGCGTGTCTGTCCGCGCGCGCTTG	FALSE	1.17021	1.15879	1.22228	0.814768	0.993335	0.820682	3.9706	4.17346	5.15421	1.1881	0.363248	1.20649	1.27865	1.15888	1.05859	0.874222	0.919325	0.960858	1.06924	1.29914	1.4722
inducibleMutant_.i1.-1821590268_mm_chr11:74986755$scrRFX5_scrRFX5at-15^CREB5_CREB5at15^CREB5_CREB5at31_1	1052	63	577	2281	4274	1173	717	965	1454	1466	2685	1553	2106	1422	1535	219	2538	3988	3016	2649	1304	1801	982	1992	1275	2839	AGGCGGGGGCGGGGCTTCGATCAGGCCGCCCCGCCCTACCCCCACCGCTCCCCAGCGCCGGAAAAGCCTCCCCGCTGGGACATCTTTGACGTCACAGGACTCTGACGTCACGGTCGCGTGTCTGTCCGCGCGCGCTTG	FALSE	1.42785	1.52547	1.50536	1.09362	1.08867	1.03026	9.27923	9.39356	5.63359	2.53706	0.173585	2.92215	1.44588	1.5532	1.42624	1.09334	0.902245	0.981609	2.362	2.58908	3.13681
inducibleMutant_.If.-1025335246_mm_chr11:74986755$scrRFX5_scrRFX5at-15^CREB5_CREB5at15^CREB5_CREB5at31_1	1794	75	820	2920	6133	1530	915	1578	2637	2471	3240	1792	2361	1799	2057	292	3280	5493	3991	3677	2272	4054	1675	2193	1350	3389	AGGCGGGGGCGGGGCTTCGATCAGGCCGCCCCGCCCTACCCCCACCGCTCCCCAGGCGGCCTTTACGGAGCCCGCTGGGACATCTTTGACGTCACAGGACTCTGACGTCACGGTCGCGTGTCTGTCCGCGCGCGCTTG	FALSE	1.36192	1.39136	1.33397	1.41356	1.56067	1.37263	9.30824	10.5625	5.75807	3.39028	0.161931	3.25416	1.2582	1.29993	1.34576	1.50575	1.60532	1.32346	2.5716	2.7081	3.44166
RFXgreatMutant_.i1.-73034292_mm_chr3:120015905$RFX5_RFX5at-23^scrCREB5_scrCREB5at-22^scrCREB5_scrCREB5at2^scrRFX5_scrRFX5at11_1	139	163	43	76	129	38	293	289	403	471	556	352	469	442	137	406	151	224	81	40	405	662	315	496	211	704	AGGCTGCTCTCCTTAAAACAAGATATGCTCTGAGTCAAAGTAGAATTGATTCCATGGTAAGTGCTAGATACTTAAGTGCAGGAGCCTGCTTTTTAATCAGTCAAATTGTTCTTTGTCAAGAAATAACCACATACTGTT	FALSE	0.951241	1.11238	1.07853	1.05369	0.970768	1.0649	0.756574	0.693804	0.446604	0.820317	1.09903	0.532902	1.15825	0.826946	1.13783	1.09247	1.06695	1.01301	0.426826	0.223706	0.152385
RFXgreatMutant_.If.-1646222172_mm_chr3:120015905$scrCREB5_scrCREB5at2^RFX5_RFX5at-23^scrCREB5_scrCREB5at-22^scrRFX5_scrRFX5at11_1	731	753	241	335	463	147	667	551	918	1033	1181	668	903	828	369	1086	398	445	242	163	549	972	424	682	367	926	AGGCTGCTCTCCTTAAAACAAGATATGCTCTGAGTCAAAGTAGAATTGTTTCCATGGTAACTGCTAGATACAATTCACGTCCTGCCTGCTTTTTAATCAGTCAAATTGTTCTTTGTCAAGAAATAACCACATACTGTT	FALSE	1.07859	1.12688	1.10851	1.07241	1.18044	1.24675	1.46496	1.09388	0.758923	1.89507	2.23028	1.31201	0.850151	0.767808	0.798925	0.790529	0.836269	0.727884	0.452642	0.356779	0.331484
RFXgreatMutant_.If.-1724243938_mm_chr3:120015905$scrRFX5_scrRFX5at11^RFX5_RFX5at-23^scrCREB5_scrCREB5at-22^scrCREB5_scrCREB5at2_1	423	375	162	139	200	80	477	427	651	702	812	477	705	451	223	574	313	296	152	81	557	748	353	660	412	862	AGGCTGCTCTCCTTAAAACAAGATATGCTCTGAGTCAAAGTAGAATTGTTTCCATGGTAACTGCTAGATACTTAAGTGCACCTCGGACGAAAAATTTCAGTCAAATTGTTCTTTGTCAAGAAATAACCACATACTGTT	FALSE	1.3615	1.47732	1.58889	1.52577	1.53687	1.5555	0.849967	0.660733	0.577534	1.5334	1.55311	1.23323	1.51046	1.58248	1.36539	1.4725	1.1815	1.11256	0.552764	0.411416	0.302422
RFXgreatMutant_.i1.1953926928_mm_chr3:120015905$scrRFX5_scrRFX5at11^RFX5_RFX5at-23^scrCREB5_scrCREB5at-22^scrCREB5_scrCREB5at2_1	773	711	249	218	442	184	487	403	565	720	834	447	648	516	323	952	494	550	298	201	354	742	396	544	266	802	AGGCTGCTCTCCTTAAAACAAGATATGCTCTGAGTCAAAGTAGAATTGTTTCCATGGTAACTGCTAGATACTTAAGTGCAGGAGCCTGCTATTTAATCAGTCAAATTGTTCTTTGTCAAGAAATAACCACATACTGTT	FALSE	1.22223	1.21001	1.27646	1.25862	1.16582	1.39442	1.30567	1.43024	1.30105	2.74464	2.88423	1.85659	1.08816	0.892995	1.11033	0.817955	1.02439	1.09087	0.897714	0.704986	0.655921
putativeConstitWgreatRFXsite_.chr3:120015905_base_RFX25_great_tiles_from_constitK27_CBP_peaks_1	475	538	168	156	289	125	483	646	994	1118	1387	669	968	788	239	720	262	303	203	107	669	1193	491	818	493	1131	AGGCTGCTCTCCTTAAAACAAGATATGCTCTGAGTCAAAGTAGAATTGTTTCCATGGTAACTGCTAGATACTTAAGTGCAGGAGCCTGCTTTTTAATCAGTCAAATTGTTCTTTGTCAAGAAATAACCACATACTGTT	FALSE	1.33103	1.18586	1.24862	1.32113	1.34305	1.41784	0.94207	0.9429	0.891188	1.70052	2.20052	1.26302	1.07144	1.08377	1.02533	1.01222	1.07851	0.88569	0.323848	0.314473	0.228646
RFXgreatMutant_.i1.219175114_mm_chr3:120015905$scrCREB5_scrCREB5at-22^RFX5_RFX5at-23^scrCREB5_scrCREB5at2^scrRFX5_scrRFX5at11_1	153	159	36	78	145	71	333	170	298	306	453	280	352	307	117	436	155	151	107	53	268	484	241	336	197	480	AGGCTGCTCTCCTTAAAACAAGATATGCTCTGAGTCAAAGTAGAATTGTTTCGACGGTAACTGCTAGATACTTAAGTGCAGGAGCCTGCTTTTTAATCAGTCAAATTGTTCTTTGTCAAGAAATAACCACATACTGTT	FALSE	1.11583	1.27395	1.16543	0.892379	1.0335	0.996079	0.683213	0.686181	0.73421	0.794477	0.943285	0.392559	1.12965	1.11159	1.11694	1.04081	1.1231	1.11585	0.414251	0.425461	0.290699
RFXgreatMutant_.If.1012199685_mm_chr8:133443027$scrCREB5_scrCREB5at-69^RFX5_RFX5at-17^CREB5_CREB5at53_1	9346	12109	5732	3516	6914	3616	3139	2859	4887	4862	4271	2320	3205	2617	2704	6195	4336	3727	2224	1753	2097	3711	1725	2503	1451	3665	AGGGTACAGTCTACATACACAAGTCCTTTCTTCACAGACCCTCAATTATTCCTGTTACTATGGAAACCACTGCCTGTGTCAGAGCACCTCAGAGCGGGTGGGAAGGAGGCATGAGCTGCTGCCATGGCAACATGTCTC	FALSE	1.23414	1.23827	1.24482	1.76055	1.98825	1.85662	3.26711	3.47099	3.96683	5.14836	7.62091	6.63073	0.987187	0.960463	1.00045	0.955367	1.01018	0.936941	1.19945	1.0374	1.12793
RFXrandMutant_.i1.-2114737208_mm_chr9:67917867$RFX5_RFX5at-52^scrCREB5_scrCREB5at-38^scrRFX5_scrRFX5at39^CREB5_CREB5at44^scrCREB5_scrCREB5at44_1	900	832	389	513	888	438	1270	1090	1676	1733	2646	1324	1757	1885	890	2457	1384	1561	792	647	1584	2487	1161	1875	1029	2505	AGGTGTGAGCGTATTGCCTATGCTGTGATAAGTCAGATTTATATATTCAGATCAGATTGGAGTTGGAGATTTTTTTTTTTAAGGGAGCAGATGCAGCAGAAGGTGTGACTGCAAATAATGTAACACAAATGTTTGATG	FALSE	1.06149	0.98109	0.94742	0.931867	0.946662	0.918751	1.1782	1.10185	1.18762	1.22539	1.29422	1.11222	1.02667	0.945629	0.94934	1.00189	0.939885	0.875483	0.697455	0.512895	0.577961
RFXrandMutant_.If.1333432310_mm_chr9:67917867$scrCREB5_scrCREB5at-38^RFX5_RFX5at-52^scrRFX5_scrRFX5at39^CREB5_CREB5at44^scrCREB5_scrCREB5at44_1	3383	3389	1552	2244	3653	1600	4627	3527	5318	5703	7422	4023	5821	5510	3443	9521	6914	5627	3608	2513	5023	8514	4255	5374	3086	7593	AGGTGTGAGCGTATTGCCTTTGCTGTGATAAAAGTCTAAATATTATTCAGATCAGATTGGAGTTGGAGATTTTTTTTTTTAAGGGAGCAGATGCAGCAGAAGGTGTGACTGCAAATAATGTAACACAAATGTTTGATG	FALSE	1.01861	1.01984	1.07381	1.03156	1.02761	1.03434	1.41458	1.24413	1.19077	1.26426	1.44698	1.21798	1.00667	0.9702	0.984436	1.08689	1.10076	1.09768	0.860102	0.799336	0.767974
RFXrandMutant_.i1.-1244209261_mm_chr9:67917867$CREB5_CREB5at44^RFX5_RFX5at-52^scrCREB5_scrCREB5at-38^scrRFX5_scrRFX5at39^scrCREB5_scrCREB5at44_1	411	508	206	333	517	247	662	641	906	1123	1450	774	1098	865	487	1281	964	764	486	396	908	1264	763	1158	644	1693	AGGTGTGAGCGTATTGCCTTTGCTGTGATAATTCAGATTTATATATTCAGATCAGATTGGAGTTGGAGATTTTTTTTTTTAAGGGAGCAGATGCAGCAGAAGGTGTGACTGCAAATAATGGACCACAAATGTTTGATG	FALSE	1.26762	1.24985	1.29023	1.19421	1.11518	1.2974	1.46721	1.23069	1.28483	1.07354	1.51599	1.12994	1.38177	1.28969	1.39819	1.25154	1.04098	1.25382	0.743879	0.685858	0.770876
putativeConstitWgoodRFXsite_.chr9:67917867_base_RFX25_great_tiles_from_constitK27_CBP_peaks_1	587	576	325	403	695	343	858	648	993	1102	1361	681	1081	1115	674	1679	1251	1023	813	447	957	1463	807	1049	618	1558	AGGTGTGAGCGTATTGCCTTTGCTGTGATAATTCAGATTTATATATTCAGATCAGATTGGAGTTGGAGATTTTTTTTTTTAAGGGAGCAGATGCAGCAGAAGGTGTGACTGCAAATAATGTAACACAAATGTTTGATG	FALSE	0.923042	0.853109	0.985446	0.936567	0.948215	0.987683	1.37001	1.27647	1.37662	1.183	1.32625	1.37544	0.971053	0.960131	0.998201	1.02332	0.934716	1.02879	0.772726	0.890082	0.675053
RFXrandMutant_.If.-1036387160_mm_chr9:67917867$CREB5_CREB5at44^RFX5_RFX5at-52^scrCREB5_scrCREB5at-38^scrRFX5_scrRFX5at39^scrCREB5_scrCREB5at44_1	1500	1728	733	863	1531	805	2242	1761	2618	3066	3489	2136	2856	2939	1463	4462	3445	2650	1559	1151	2553	4120	2009	2702	1643	3962	AGGTGTGAGCGTATTGCCTTTGCTGTGATAATTCAGATTTATATATTCAGATCAGATTGGAGTTGGAGATTTTTTTTTTTAAGGGAGCAGATGCAGCAGAAGGTGTGACTGCATTATTACATTGTCAAATGTTTGATG	FALSE	0.897717	1.01516	0.987735	0.965603	0.948424	1.04252	1.12274	1.0761	1.23642	1.15688	1.52264	1.18718	0.948917	0.9684	0.963032	1.03568	0.998638	0.971644	0.759401	0.647531	0.659449
RFXrandMutant_.If.900337561_mm_chr9:67917867$scrRFX5_scrRFX5at39^RFX5_RFX5at-52^scrCREB5_scrCREB5at-38^CREB5_CREB5at44^scrCREB5_scrCREB5at44_1	991	1063	485	612	1073	483	1446	1220	1928	2086	2368	1445	2042	1779	991	3009	1983	1859	1048	817	1678	2793	1444	2063	1138	2945	AGGTGTGAGCGTATTGCCTTTGCTGTGATAATTCAGATTTATATATTCAGATCAGATTGGAGTTGGAGATTTTTTTTTTTAAGGGAGCAGATGCAGCAGAAGGTGTGAGACGTTTATTACATTGACAAATGTTTGATG	FALSE	1.00657	1.13455	1.16671	1.10515	1.15389	1.17179	1.23449	1.16935	1.15023	1.18506	1.4523	1.21792	1.19692	1.10811	1.18259	1.12458	1.11842	1.15377	0.880092	0.719117	0.773306
RFXrandMutant_.i1.-1077189417_mm_chr9:67917867$scrRFX5_scrRFX5at39^RFX5_RFX5at-52^scrCREB5_scrCREB5at-38^CREB5_CREB5at44^scrCREB5_scrCREB5at44_1	1191	1310	580	856	1325	693	1726	1748	2684	2765	3520	1811	2376	2702	1342	3583	2411	2099	1171	960	2421	4182	2073	2487	1470	3419	AGGTGTGAGCGTATTGCCTTTGCTGTGATAATTCAGATTTATATATTCAGATCAGATTGGAGTTGGAGATTTTTTTTTTTAAGGGAGCAGATGCAGCAGAAGGTGTGAGTGCAAATAAAGTAACACAAATGTTTGATG	FALSE	0.985134	0.936193	0.893806	1.04254	1.05762	1.02263	1.44657	1.20973	1.38261	1.19318	1.49941	1.22021	0.95002	0.94243	0.90394	1.06828	1.10258	1.09054	0.654262	0.529037	0.598262
RFXrandMutant_.i1.1593291987_mm_chr9:67917867$scrCREB5_scrCREB5at-38^RFX5_RFX5at-52^scrRFX5_scrRFX5at39^CREB5_CREB5at44^scrCREB5_scrCREB5at44_1	595	552	317	485	579	409	957	802	1332	1420	1691	837	1172	1173	776	1453	1178	982	684	500	1270	1896	942	1314	643	1918	AGGTGTGAGCGTATTGCCTTTGCTGTGATAATTCAGGTCTATATATTCAGATCAGATTGGAGTTGGAGATTTTTTTTTTTAAGGGAGCAGATGCAGCAGAAGGTGTGACTGCAAATAATGTAACACAAATGTTTGATG	FALSE	1.09014	0.996689	1.01557	1.10183	1.20903	1.20977	1.47821	0.953414	1.47169	1.07508	1.13951	1.2028	1.15622	0.949576	1.16809	1.29087	1.15146	1.14151	0.70508	0.711823	0.717757
RFXrandMutant_.If.-347736225_mm_chr9:67917867$RFX5_RFX5at-52^scrCREB5_scrCREB5at-38^scrRFX5_scrRFX5at39^CREB5_CREB5at44^scrCREB5_scrCREB5at44_1	595	583	225	330	592	272	894	851	1051	1329	1602	1012	1241	1034	635	1477	978	887	425	366	1121	1981	936	1321	842	2086	AGGTGTGAGCGTATTGCGAAACGACACTATTAACAGATTTATATATTCAGATCAGATTGGAGTTGGAGATTTTTTTTTTTAAGGGAGCAGATGCAGCAGAAGGTGTGACTGCAAATAATGTAACACAAATGTTTGATG	FALSE	1.1716	1.36707	1.21993	1.32632	1.08222	1.28444	1.07667	1.04352	1.0477	1.15084	1.28831	0.913885	1.31863	1.41061	1.44118	1.29259	1.36482	1.28671	0.722483	0.501744	0.596027
activeMutant_.ip.2060618961_mm_chr16:97296915$RFX5_RFX5at-48^scrCREB5_scrCREB5at-35^scrCREB5_scrCREB5at-15^RFX5_RFX5at6^CREB5_CREB5at33_1	7644	8729	5266	5099	8113	5140	2108	4358	6824	7891	11387	6062	8303	1486	2634	5490	4848	7659	5653	4823	1660	2789	1576	4311	2603	7097	AGTAGGTATGTGGCCCATCTCCGTTGCCATGGCAACGTGCACGTAAGTGAGATCTGCAGTGAGATATTGTTAGAGTGTTGCTAAGGCAACAGGACTGCAGGAGATGATGAAATAGGAACCAGAATCCACACTGCTCCA	FALSE	5.79467	5.69809	5.67934	4.72614	4.88937	5.30669	7.05537	6.06493	8.39651	6.27024	8.18057	9.07103	2.99434	3.0344	3.41178	1.33188	1.33703	1.50752	4.34088	4.64381	5.46517
activeMutant_.i1.438842299_mm_chr16:97296915$RFX5_RFX5at-48^scrCREB5_scrCREB5at-35^scrCREB5_scrCREB5at-15^RFX5_RFX5at6^CREB5_CREB5at33_1	996	1406	632	616	1202	959	682	581	895	965	1216	692	959	445	560	1373	970	964	839	602	446	747	394	744	378	1047	AGTAGGTATGTGGCCCATCTCTCACTCCATGGCTAGTTGCACGTAAGTGAGATCTGCAGTGAGATATTGTTAGAGTGTTGCTAAGGCAACAGGACTGCAGGAGATGATGAAATAGGAACCAGAATCCACACTGCTCCA	FALSE	2.06639	2.17209	2.19049	2.10404	2.14139	2.1671	2.63452	2.77738	4.84217	2.52528	4.07278	3.36495	1.72566	1.47146	1.68079	1.19495	1.19583	1.25853	1.82449	2.30153	2.27794
activeMutant_.ip.79185599_mm_chr16:97296915$scrCREB5_scrCREB5at-35^RFX5_RFX5at-48^scrCREB5_scrCREB5at-15^RFX5_RFX5at6^CREB5_CREB5at33_1	3480	3680	1910	2222	4168	2257	2928	2255	3278	3364	4858	2700	3465	1948	2494	5435	4168	4239	3061	2111	1934	2924	1521	2801	1634	4022	AGTAGGTATGTGGCCCATCTCTCTCTCCATGGCTAACCCTCAAGGTGTGAGATCTGCAGTGAGATATTGTTAGAGTGTTGCTAAGGCAACAGGACTGCAGGAGATGATGAAATAGGAACCAGAATCCACACTGCTCCA	FALSE	1.88585	1.93601	1.80799	1.8655	1.79165	1.72575	2.2135	2.24322	2.6544	2.05515	2.48294	2.36869	1.48411	1.45305	1.47495	1.1837	1.0693	1.10986	1.83273	1.91818	1.82476
activeMutant_.ip.42932382_mm_chr16:97296915$scrCREB5_scrCREB5at-15^RFX5_RFX5at-48^scrCREB5_scrCREB5at-35^RFX5_RFX5at6^CREB5_CREB5at33_1	1544	1761	841	894	2321	1016	1376	875	1500	1514	2916	1457	1928	896	1039	2520	2060	1919	1365	988	811	1554	801	1512	860	2164	AGTAGGTATGTGGCCCATCTCTCTCTCCATGGCTATTTGCACGTAAGTGAGATCAACCCTCAAGGTTTGTTAGAGTGTTGCTAAGGCAACAGGACTGCAGGAGATGATGAAATAGGAACCAGAATCCACACTGCTCCA	FALSE	2.46103	2.27135	2.18716	1.57376	1.78244	1.68861	1.89507	2.6581	2.54262	1.94027	2.52831	2.21934	1.74175	1.66267	1.72534	1.07917	1.23553	1.27072	1.80381	1.85968	1.85675
activeMutant_.If.17199934_mm_chr16:97296915$scrCREB5_scrCREB5at-15^RFX5_RFX5at-48^scrCREB5_scrCREB5at-35^RFX5_RFX5at6^CREB5_CREB5at33_1	1440	1763	872	2252	3974	2021	1392	694	1226	1297	4432	2056	3189	711	1020	2601	1802	3656	2344	2254	653	1109	565	2499	1377	3886	AGTAGGTATGTGGCCCATCTCTCTCTCCATGGCTATTTGCACGTAAGTGAGATCACGTCACTCTATTTGTTAGAGTGTTGCTAAGGCAACAGGACTGCAGGAGATGATGAAATAGGAACCAGAATCCACACTGCTCCA	FALSE	4.71377	4.03911	4.55897	1.573	1.83592	1.82298	4.71883	4.49887	4.99958	1.78878	2.50209	2.2747	3.62776	3.35491	3.90444	1.09501	1.11115	1.12955	4.33073	4.02441	5.33814
activeMutant_.i2.753736978_mm_chr16:97296915$scrCREB5_scrCREB5at-15^RFX5_RFX5at-48^scrCREB5_scrCREB5at-35^RFX5_RFX5at6^CREB5_CREB5at33_1	570	723	309	400	956	526	351	215	294	324	668	392	529	281	301	956	601	581	650	465	162	327	145	384	256	548	AGTAGGTATGTGGCCCATCTCTCTCTCCATGGCTATTTGCACGTAAGTGAGATCCGCAGTGAGATGTTGTTAGAGTGTTGCTAAGGCAACAGGACTGCAGGAGATGATGAAATAGGAACCAGAATCCACACTGCTCCA	FALSE	1.79766	1.94855	1.91351	1.23302	1.11397	1.15226	3.32398	4.29206	5.16042	2.80803	4.06931	3.19667	1.41048	1.57816	1.39316	0.68736	0.828995	0.73348	1.74138	2.82372	2.78645
activeMutant_.i1.-282822896_mm_chr16:97296915$scrCREB5_scrCREB5at-15^RFX5_RFX5at-48^scrCREB5_scrCREB5at-35^RFX5_RFX5at6^CREB5_CREB5at33_1	674	799	353	459	823	469	498	442	625	819	1029	540	800	345	383	996	667	854	521	484	262	462	259	522	308	817	AGTAGGTATGTGGCCCATCTCTCTCTCCATGGCTATTTGCACGTAAGTGAGATCTGCAGGGCGATATTGTTAGAGTGTTGCTAAGGCAACAGGACTGCAGGAGATGATGAAATAGGAACCAGAATCCACACTGCTCCA	FALSE	2.25546	2.18629	2.35696	2.06463	1.92883	2.37233	2.68837	2.60427	3.24302	2.34026	3.16962	2.5739	1.56169	1.54649	1.69172	0.905436	0.953967	1.06711	2.0848	1.84346	2.36228
activeMutant_.If.1095171422_mm_chr16:97296915$RFX5_RFX5at6^RFX5_RFX5at-48^scrCREB5_scrCREB5at-35^scrCREB5_scrCREB5at-15^CREB5_CREB5at33_1	662	473	371	380	758	448	778	319	478	553	759	481	585	413	636	1322	989	784	726	449	418	679	447	542	337	909	AGTAGGTATGTGGCCCATCTCTCTCTCCATGGCTATTTGCACGTAAGTGAGATCTGCAGTGAGATATTGTTAGAGACAACGATTCCGTTGTGGACTGCAGGAGATGATGAAATAGGAACCAGAATCCACACTGCTCCA	FALSE	1.38973	1.62677	1.43975	1.24474	1.23228	1.33809	1.42465	1.53534	1.98292	1.47134	1.20108	1.73157	1.35454	1.4135	1.57231	1.20671	1.1712	1.53845	1.59879	2.14586	1.83063
activeMutant_.ip.188790022_mm_chr16:97296915$RFX5_RFX5at6^RFX5_RFX5at-48^scrCREB5_scrCREB5at-35^scrCREB5_scrCREB5at-15^CREB5_CREB5at33_1	2428	2684	1245	1128	1975	1099	847	735	1128	1310	1624	827	1166	499	678	1911	1048	1739	987	1016	292	735	322	778	446	1060	AGTAGGTATGTGGCCCATCTCTCTCTCCATGGCTATTTGCACGTAAGTGAGATCTGCAGTGAGATATTGTTAGAGCGTTGCCATGGCAACGGGACTGCAGGAGATGATGAAATAGGAACCAGAATCCACACTGCTCCA	FALSE	2.46107	2.31493	2.37509	2.3737	2.40681	2.6235	3.88447	3.6745	4.46808	4.95678	6.26021	5.33743	1.60924	1.54829	1.51751	0.697683	1.04929	0.917238	2.93511	2.41452	3.42846
activeMutant_.i2.-382169812_mm_chr16:97296915$RFX5_RFX5at6^RFX5_RFX5at-48^scrCREB5_scrCREB5at-35^scrCREB5_scrCREB5at-15^CREB5_CREB5at33_1	884	910	387	514	1252	528	1243	471	721	892	1277	683	982	789	823	1895	1291	1419	749	607	677	1069	539	953	579	1253	AGTAGGTATGTGGCCCATCTCTCTCTCCATGGCTATTTGCACGTAAGTGAGATCTGCAGTGAGATATTGTTAGAGTCTTGCTAAGGCATCAGGACTGCAGGAGATGATGAAATAGGAACCAGAATCCACACTGCTCCA	FALSE	1.22392	1.20914	1.26508	0.962017	0.972951	1.12979	1.20614	1.58726	1.46275	1.22975	1.44631	1.13054	1.24669	1.27121	1.13449	1.02303	0.965186	0.971043	1.51471	1.15883	1.29544
activeMutant_.i1.1913025996_mm_chr16:97296915$RFX5_RFX5at6^RFX5_RFX5at-48^scrCREB5_scrCREB5at-35^scrCREB5_scrCREB5at-15^CREB5_CREB5at33_1	5284	5146	2584	3172	6329	2929	6706	3243	5095	5425	7267	3893	5301	4953	5430	11804	8513	7641	5698	4310	4521	7737	3721	5621	3493	7924	AGTAGGTATGTGGCCCATCTCTCTCTCCATGGCTATTTGCACGTAAGTGAGATCTGCAGTGAGATATTGTTAGAGTGATGCTAAGGCAAGAGGACTGCAGGAGATGATGAAATAGGAACCAGAATCCACACTGCTCCA	FALSE	1.10949	1.09786	1.08786	1.05516	1.09524	1.09457	1.37967	1.48726	1.50405	1.36249	1.51599	1.39919	1.17135	1.22165	1.14288	1.08828	1.11279	1.06787	1.29929	1.40433	1.46526
activeMutant_.ip.153907732_mm_chr16:97296915$CREB5_CREB5at33^RFX5_RFX5at-48^scrCREB5_scrCREB5at-35^scrCREB5_scrCREB5at-15^RFX5_RFX5at6_1	3049	3475	1808	1037	1872	1043	1734	3171	4804	5448	2873	1583	2234	1485	1765	4180	3492	2217	1244	974	2108	3356	1959	1693	1007	2436	AGTAGGTATGTGGCCCATCTCTCTCTCCATGGCTATTTGCACGTAAGTGAGATCTGCAGTGAGATATTGTTAGAGTGTTGCTAAGGCAACAGGACTGCAGGAAATGACGTCACCGGAACCAGAATCCACACTGCTCCA	FALSE	1.46301	1.48897	1.52911	3.44119	3.44436	3.66624	1.74436	1.70126	2.07129	3.04048	3.95909	3.78613	1.17672	1.17468	1.17186	1.69247	1.60993	1.87514	1.25737	1.02261	1.10443
activeMutant_.If.75452632_mm_chr16:97296915$CREB5_CREB5at33^RFX5_RFX5at-48^scrCREB5_scrCREB5at-35^scrCREB5_scrCREB5at-15^RFX5_RFX5at6_1	4628	5161	2709	1393	2652	1258	3124	2006	2949	3208	3431	1713	2336	2147	2722	6066	4606	2762	2016	1549	2036	3081	1683	2161	1236	3511	AGTAGGTATGTGGCCCATCTCTCTCTCCATGGCTATTTGCACGTAAGTGAGATCTGCAGTGAGATATTGTTAGAGTGTTGCTAAGGCAACAGGACTGCAGGACTACTACTTTATGGAACCAGAATCCACACTGCTCCA	FALSE	1.20844	1.11444	1.10592	1.5057	1.46243	1.49318	1.30061	1.33776	1.38668	2.56163	3.26372	3.1488	1.03888	0.997248	1.16822	1.13063	1.02228	1.11424	1.08347	1.14623	1.21486
activeMutant_.i2.1079935366_mm_chr16:97296915$CREB5_CREB5at33^RFX5_RFX5at-48^scrCREB5_scrCREB5at-35^scrCREB5_scrCREB5at-15^RFX5_RFX5at6_1	5382	5567	3040	1315	2436	1157	2275	2451	3711	4013	2812	1563	2201	1757	1967	4460	3444	2642	1351	1093	1725	2584	1475	1716	965	2699	AGTAGGTATGTGGCCCATCTCTCTCTCCATGGCTATTTGCACGTAAGTGAGATCTGCAGTGAGATATTGTTAGAGTGTTGCTAAGGCAACAGGACTGCAGGAGAGGCTGAAATAGGAACCAGAATCCACACTGCTCCA	FALSE	1.21027	1.24257	1.2733	2.24807	2.2488	2.28249	1.68597	1.68737	1.75129	4.09069	4.83426	4.8522	1.00806	0.95142	1.09738	1.17056	1.04769	1.19329	1.26644	0.938637	1.0475
active_.chr16:97296915_base_active_1	4600	4706	2553	2536	4414	2523	2191	2225	3282	3840	5504	2871	3848	1468	1968	4735	2903	4251	2549	2128	1370	2520	1325	3141	1702	4306	AGTAGGTATGTGGCCCATCTCTCTCTCCATGGCTATTTGCACGTAAGTGAGATCTGCAGTGAGATATTGTTAGAGTGTTGCTAAGGCAACAGGACTGCAGGAGATGATGAAATAGGAACCAGAATCCACACTGCTCCA	FALSE	2.83524	2.73174	2.66435	2.44255	2.38037	2.61406	3.37608	3.17471	3.96535	3.63036	4.24326	4.23112	2.20843	2.0084	2.09543	1.11268	1.22288	1.28297	2.43888	2.11962	2.44091
activeMutant_.i1.-1256426525_mm_chr16:97296915$CREB5_CREB5at33^RFX5_RFX5at-48^scrCREB5_scrCREB5at-35^scrCREB5_scrCREB5at-15^RFX5_RFX5at6_1	3763	3827	2394	1261	2414	1134	2299	1213	1878	1901	1949	1052	1479	1497	2226	4503	3321	2392	1641	1207	953	1996	1053	1383	789	1938	AGTAGGTATGTGGCCCATCTCTCTCTCCATGGCTATTTGCACGTAAGTGAGATCTGCAGTGAGATATTGTTAGAGTGTTGCTAAGGCAACAGGACTGCAGGAGATGATGGACTAGGAACCAGAATCCACACTGCTCCA	FALSE	0.984528	0.981581	1.00422	1.3058	1.33569	1.26903	1.59986	1.65468	1.69856	2.83028	3.28859	3.78122	0.953548	0.913003	0.924821	0.759009	0.949837	0.999846	1.34575	1.33814	1.35766
activeMutant_.i1.-981215649_mm_chr16:97296915$scrCREB5_scrCREB5at-35^RFX5_RFX5at-48^scrCREB5_scrCREB5at-15^RFX5_RFX5at6^CREB5_CREB5at33_1	4473	4951	2488	2716	4744	2668	2636	2813	4227	4903	6539	3487	4579	1945	2473	5539	3713	4023	2863	2759	2023	3223	1629	3463	2077	5636	AGTAGGTATGTGGCCCATCTCTCTCTCCATGGCTATTTGGACGTAAGTGAGATCTGCAGTGAGATATTGTTAGAGTGTTGCTAAGGCAACAGGACTGCAGGAGATGATGAAATAGGAACCAGAATCCACACTGCTCCA	FALSE	2.54232	2.50417	2.39295	2.33071	2.3139	2.51914	3.00531	2.83605	3.48535	2.93419	3.71054	3.42729	1.8377	1.84984	2.07003	1.24009	1.18046	1.1905	1.74203	1.79687	2.38857
activeMutant_.i2.-9563105_mm_chr16:97296915$scrCREB5_scrCREB5at-35^RFX5_RFX5at-48^scrCREB5_scrCREB5at-15^RFX5_RFX5at6^CREB5_CREB5at33_1	2893	3014	1574	1896	3732	1852	2098	1275	1809	1990	3121	1684	2206	1084	1694	4054	2940	3661	2134	1866	1064	1654	920	1852	1027	2681	AGTAGGTATGTGGCCCATCTCTCTCTCCATGGCTCTTTGCACGTAGGTGAGATCTGCAGTGAGATATTGTTAGAGTGTTGCTAAGGCAACAGGACTGCAGGAGATGATGAAATAGGAACCAGAATCCACACTGCTCCA	FALSE	2.17722	2.16993	2.06851	1.89548	1.77681	1.83457	2.63596	2.80318	3.03978	2.38439	2.8381	2.72424	1.76341	1.64119	1.76682	1.17028	1.08697	1.20638	2.84443	2.40314	2.8986
activeMutant_.If.-106005089_mm_chr16:97296915$scrCREB5_scrCREB5at-35^RFX5_RFX5at-48^scrCREB5_scrCREB5at-15^RFX5_RFX5at6^CREB5_CREB5at33_1	6211	6995	3727	3168	5940	3369	2404	2826	4179	4735	5726	3088	4061	1900	2470	5581	4603	4915	3087	3298	1777	2722	1477	3253	1777	4983	AGTAGGTATGTGGCCCATCTCTCTCTCCATGGCTTAAACGTGCATTGTGAGATCTGCAGTGAGATATTGTTAGAGTGTTGCTAAGGCAACAGGACTGCAGGAGATGATGAAATAGGAACCAGAATCCACACTGCTCCA	FALSE	2.27896	2.27016	2.17251	2.39694	2.34181	2.49045	3.84376	3.89374	4.82584	4.46747	5.74835	5.62952	1.76715	1.62013	1.87354	1.11509	1.02057	1.10498	2.17869	1.98334	2.92282
activeMutant_.i2.1565061096_mm_chr16:97296915$RFX5_RFX5at-48^scrCREB5_scrCREB5at-35^scrCREB5_scrCREB5at-15^RFX5_RFX5at6^CREB5_CREB5at33_1	1847	2075	1068	1190	1959	1281	861	864	1355	1414	2334	1125	1591	580	841	1899	1246	1802	974	829	447	920	474	1161	679	1900	AGTAGGTATGTGGCCCATCTCTCTCTCCATGGCTTTTTGCACGTAAGTGAGATCTGCAGTGAGATATTGTTAGAGTGTTGCTAAGGCAACAGGACTGCAGGAGATGATGAAATAGGAACCAGAATCCACACTGCTCCA	FALSE	3.04306	2.7093	2.7882	2.40063	2.48739	2.43631	4.03134	3.58547	5.12333	3.70935	4.76107	4.50417	2.06608	2.02796	2.34019	0.918872	1.12998	1.16165	2.61669	2.04996	2.40676
RFXgreatMutant_.If.1291200079_mm_chr6:204380862$scrRFX5_scrRFX5at-69^scrCREB5_scrCREB5at-59^RFX5_RFX5at-40^scrCREB5_scrCREB5at26_1	3771	4478	2298	2487	4438	2859	3252	4852	7053	7548	7299	3926	5520	3555	1695	4094	2689	3269	2089	1684	2875	5252	2871	4056	2517	5609	AGTTCCGTTTACGTCAGAAAAGGCTCATTGGTTACTGTGGCAACCGACTCTTCCTTGCTCTGGCTGCTTATCCCACGATCCCTCTGTCACCCTATTTTTAGACTGGAGACAACGAGTGAAAATGGCTTTAATTTTTTT	FALSE	1.55261	1.54256	1.57827	2.19948	2.11235	2.12179	2.23065	2.15056	3.0274	2.00512	2.72034	2.56594	1.17761	1.22648	1.12712	0.964215	1.05244	1.14794	0.774462	0.71732	0.797642
RFXrandMutant_.If.-1396572603_mm_chr9:155245572$scrCREB5_scrCREB5at-41^scrRFX5_scrRFX5at-63^RFX5_RFX5at-25^CREB5_CREB5at7_1	8768	9328	5217	2798	4967	2616	3353	4032	6373	6597	5019	2947	3940	2785	2173	4909	4167	3171	2103	1370	2413	3925	2235	2871	1686	4365	AGTTGCAGGAAAAGAATGCTCAGGGCTAAGAACGTACCGTACAGAGTAGCCATGGCAACAGAGTAGCCATGGCAACAGTGTAGTCATGGCAACGAAAAACTCAGTAGTGGATCTCATTAGTATAGGAGCTTTTGCTGA	FALSE	1.36279	1.47804	1.43798	2.3331	2.43641	2.36718	2.434	2.3344	2.68665	4.5217	5.49598	5.64981	1.06402	1.0487	1.11966	1.03302	1.00398	1.14072	0.95895	0.921782	0.828325
RFXrandMutant_.i1.-794166708_mm_chr9:155245572$RFX5_RFX5at-25^scrRFX5_scrRFX5at-63^scrCREB5_scrCREB5at-41^CREB5_CREB5at7_1	2489	2420	1522	613	1373	595	1050	1180	1695	1743	1601	1018	1240	1031	600	1296	1262	952	578	488	1128	1664	850	1079	663	1670	AGTTGCAGGAAAAGAATGCTCAGGGCTATCTTGCATGGCAACAGAGAAGCCATGGCAAGAGAGTAGCCATGGCAACAGTGTAGTCATGGCAACGAAAAACTCAGTAGTGGATCTCATTAGTATAGGAGCTTTTGCTGA	FALSE	1.17428	1.37918	1.22249	1.84443	1.75043	1.68947	1.70285	2.06061	1.95134	4.09892	4.55319	5.26347	1.0802	1.11397	1.15713	1.30445	1.14975	1.17189	0.777684	0.684358	0.797015
RFXrandMutant_.i1.1239815570_mm_chr9:155245572$CREB5_CREB5at7^scrRFX5_scrRFX5at-63^scrCREB5_scrCREB5at-41^RFX5_RFX5at-25_1	12965	13940	7631	3232	5617	2854	3872	5656	9004	9536	6868	3686	4891	3977	2911	6829	5557	3749	2418	1708	3953	6202	3228	4066	2356	6059	AGTTGCAGGAAAAGAATGCTCAGGGCTATCTTGCATGGCAACAGAGTAGCCATGGCAACAGAGTAGCCATGGCAACAGTGTAGGCCTGGCAACGAAAAACTCAGTAGTGGATCTCATTAGTATAGGAGCTTTTGCTGA	FALSE	1.30591	1.29459	1.25004	2.29188	2.41053	2.39619	2.43468	2.28604	2.53819	5.78991	7.11242	7.15637	1.05525	1.02621	1.08836	1.18508	1.11093	1.15373	0.793934	0.74219	0.723165
putativeConstitWgoodRFXsite_.chr9:155245572_base_RFX25_great_tiles_from_constitK27_CBP_peaks_1	30593	34282	19464	8030	13946	7944	9079	13508	20524	22666	14901	7864	11014	7851	6163	15072	13491	8629	5517	4437	8143	13108	7089	8629	5136	12681	AGTTGCAGGAAAAGAATGCTCAGGGCTATCTTGCATGGCAACAGAGTAGCCATGGCAACAGAGTAGCCATGGCAACAGTGTAGTCATGGCAACGAAAAACTCAGTAGTGGATCTCATTAGTATAGGAGCTTTTGCTGA	FALSE	1.43525	1.39911	1.42594	2.77271	2.78336	2.8851	2.57978	2.42062	3.01306	5.82664	7.45964	7.78468	1.13443	1.13323	1.15386	1.23662	1.18938	1.28347	0.925679	0.857812	0.951634
RFXrandMutant_.If.1463226890_mm_chr9:155245572$CREB5_CREB5at7^scrRFX5_scrRFX5at-63^scrCREB5_scrCREB5at-41^RFX5_RFX5at-25_1	1363	1692	833	482	830	386	597	808	1204	1411	1609	722	1032	565	365	923	858	485	414	221	601	984	560	718	416	1140	AGTTGCAGGAAAAGAATGCTCAGGGCTATCTTGCATGGCAACAGAGTAGCCATGGCAACAGAGTAGCCATGGCAACTCACATCAGTACGCAACGAAAAACTCAGTAGTGGATCTCATTAGTATAGGAGCTTTTGCTGA	FALSE	2.1535	1.78493	1.85658	2.30463	2.26887	2.49568	2.35493	2.19088	2.22648	3.94781	5.59907	5.06661	1.31165	1.27545	1.44139	1.26824	1.24067	1.40885	0.722966	0.894471	0.658642
RFXrandMutant_.i1.-586535024_mm_chr9:155245572$scrCREB5_scrCREB5at-41^scrRFX5_scrRFX5at-63^RFX5_RFX5at-25^CREB5_CREB5at7_1	13630	15024	7513	3453	5999	2766	5321	5759	8905	9122	6899	3799	5132	4097	3625	8118	6363	4755	3025	2311	4260	7338	3665	4479	2640	6310	AGTTGCAGGAAAAGAATGCTCAGGGCTATCTTGGACGGCAACAGAGTAGCCATGGCAACAGAGTAGCCATGGCAACAGTGTAGTCATGGCAACGAAAAACTCAGTAGTGGATCTCATTAGTATAGGAGCTTTTGCTGA	FALSE	1.27338	1.2952	1.27322	2.26527	2.3142	2.22502	1.89282	1.77664	1.79005	4.42932	5.57805	5.12704	1.12839	1.11623	1.10024	1.23971	1.27592	1.27155	0.977483	0.901309	0.949816
RFXrandMutant_.i1.-2056891958_mm_chr9:155245572$scrRFX5_scrRFX5at-63^scrCREB5_scrCREB5at-41^RFX5_RFX5at-25^CREB5_CREB5at7_1	2859	3248	1755	693	1223	754	740	1247	1961	2231	1268	700	1052	687	444	1120	1304	580	437	401	746	1141	664	709	496	1205	AGTTGCGGGAAAAGAAAGCTCAGGGCTATCTTGCATGGCAACAGAGTAGCCATGGCAACAGAGTAGCCATGGCAACAGTGTAGTCATGGCAACGAAAAACTCAGTAGTGGATCTCATTAGTATAGGAGCTTTTGCTGA	FALSE	1.39573	1.42322	1.55647	2.92515	3.03916	3.24529	2.73154	2.60441	3.5087	6.68062	8.6711	8.61176	1.0652	1.25067	1.25301	1.29467	1.18315	1.37385	0.711043	0.776495	0.982863
RFXrandMutant_.If.1541114221_mm_chr9:155245572$scrRFX5_scrRFX5at-63^scrCREB5_scrCREB5at-41^RFX5_RFX5at-25^CREB5_CREB5at7_1	11914	14027	7557	3378	6116	3433	2128	2572	4383	4670	2986	1639	2285	1793	2540	6118	5421	3361	2191	1559	1547	2905	1392	1771	996	2553	AGTTGCTCCTTTTCTTACGAGTGGGCTATCTTGCATGGCAACAGAGTAGCCATGGCAACAGAGTAGCCATGGCAACAGTGTAGTCATGGCAACGAAAAACTCAGTAGTGGATCTCATTAGTATAGGAGCTTTTGCTGA	FALSE	1.25935	1.27682	1.29535	2.31169	2.6027	2.60284	4.63013	4.52909	5.55531	9.681	13.0222	12.8951	1.01948	0.962268	1.01718	1.02869	1.15419	1.10353	1.57875	1.49168	1.4641
inducible_.chr14:75746322_base_inducible_1	879	932	409	1823	2868	2045	1391	1425	2520	2409	16294	8478	11772	1764	1085	2550	1623	3911	2427	2410	2359	3314	1812	12197	7754	19894	ATAAAAAGCGAGTTCATTCTGGAGACTCCGGAGCGGCGCCTGCGTCAGCGCAGACGTCAGGGATATTTATAACAAACCCCCTTTCAAGCAAGTGATGCTGAAGGGATAACGGGAACGCAGCGGCAGGATGGAAGAGAC	FALSE	6.98501	6.71316	6.78318	1.30183	1.52102	1.36474	3.82266	3.24913	5.06259	1.09269	1.32367	1.06768	7.13669	7.61455	8.05655	1.59443	1.33833	1.46011	1.8673	1.67952	2.30051
inducibleMutant_.i2.-1948434462_mm_chr14:75746322$scrRFX5_scrRFX5at16_1	108	103	50	86	288	157	183	121	154	138	904	480	827	131	151	197	122	415	210	154	122	304	157	833	438	1256	ATAAAAAGCGAGTTCATTCTGGAGACTCCGGAGCGGCGCCTGCGTCAGCGCAGACGTCAGGGATATTTATAACAAACCCCCTTTCAAGTAAGTGATCCTGAAGGGATAACGGGAACGCAGCGGCAGGATGGAAGAGAC	FALSE	5.21838	5.11802	6.41677	1.48851	1.25165	1.05273	1.37073	2.48003	2.9543	1.02049	1.11193	0.992123	6.56321	5.79188	6.84926	1.11036	1.65315	1.70355	2.6681	1.95687	1.9795
inducibleMutant_.ip.-874754031_mm_chr14:75746322$scrRFX5_scrRFX5at16_1	83	112	57	112	325	216	108	93	99	146	851	380	627	111	137	236	196	465	219	233	170	216	55	756	347	921	ATAAAAAGCGAGTTCATTCTGGAGACTCCGGAGCGGCGCCTGCGTCAGCGCAGACGTCAGGGATATTTATAACAAACCCCCTTTCCCGAGAGTGATGCTCCAGGGATAACGGGAACGCAGCGGCAGGATGGAAGAGAC	FALSE	5.79755	4.78182	5.74152	1.3502	0.949609	1.31444	3.02482	4.74214	6.8871	1.32889	2.04873	1.91645	7.02977	5.41531	5.92737	1.826	1.38625	0.704314	3.52821	2.40844	3.53458
inducibleMutant_.i1.-390923006_mm_chr14:75746322$scrRFX5_scrRFX5at16_1	233	199	121	385	552	342	248	261	325	456	2708	1330	1940	325	223	486	259	587	504	435	481	564	426	2028	1238	3227	ATAAAAAGCGAGTTCATTCTGGAGACTCCGGAGCGGCGCCTGCGTCAGCGCAGACGTCAGGGATATTTATAACAAACCCCCTTTCGAGCAAGTGAAGCTGAAGGGATAACGGGAACGCAGCGGCAGGATGGAAGAGAC	FALSE	6.30091	5.71611	6.06737	1.29418	1.06471	1.40214	4.52809	3.50754	4.74876	1.62457	1.58523	1.77166	6.44061	6.59864	7.09318	1.76456	1.23625	1.86317	1.52118	1.89305	2.25378
inducibleMutant_.If.-1685229904_mm_chr14:75746322$scrRFX5_scrRFX5at16_1	265	210	136	369	697	370	269	401	593	574	3653	2014	2790	445	229	807	371	816	582	549	505	866	406	2734	1768	5066	ATAAAAAGCGAGTTCATTCTGGAGACTCCGGAGCGGCGCCTGCGTCAGCGCAGACGTCAGGGATATTTATAACAAACCCCCTTTCTTCGTTCACTACGACTAGGGATAACGGGAACGCAGCGGCAGGATGGAAGAGAC	FALSE	6.20766	6.32167	6.37274	1.45219	1.41882	1.28903	4.0011	4.08315	4.73648	1.70344	1.54226	1.83583	6.34134	6.88239	8.13263	1.35303	1.38634	1.29686	1.54438	1.59653	2.07739
inactive_.chr11:105689640_base_inactive_1	1399	1258	442	660	948	349	1762	2918	4876	5046	6251	3515	4656	4179	997	3392	1289	1346	728	468	4211	7045	3636	4725	2890	6952	ATACAGAAACTGTTTCTTGGCTCTTCTTGGTGCCTGCAGTTGTTTTACCATATGGCACTGCTCTAATTTTGTCTGTGTTCTTCTCTTGAGACTTTTGTGAATAGATTACATTTTTAGAAAAAGTTTAAAATAACTTTT	TRUE	1.13114	1.17486	1.13246	1.12526	1.24229	1.20666	1.09256	0.847846	0.682065	1.37292	1.41047	0.910884	1.167	1.19796	1.1884	1.2014	1.20093	1.23674	0.271267	0.212654	0.188573
inducibleMutant_.If.1951417556_mm_chr9:77765125$RFX5_RFX5at-22^scrRFX5_scrRFX5at-46^CREB5_CREB5at-8^CREB5_CREB5at48^scrRFX5_scrRFX5at49_1	4861	5087	2483	3777	6872	3740	5657	3149	4892	5397	8296	4450	6022	5295	4727	12082	8808	7691	5277	4181	4196	6459	3644	5549	3539	8641	ATCTGATTCTGGAATTTACAATCACGAAAGTTCTATCGCCCCAGGATACCAAGGTTCCGGCGTTGACATCATAGCGCTTGATCCTGCCTCCGGGCTCGGATTGGCTGGCCGCGCCATTGTGACGTCACGGTCAGCCCA	FALSE	1.18479	1.17389	1.156	0.958397	0.983678	1.01858	1.94745	1.91431	2.27663	1.48585	1.7765	1.59381	1.08166	1.15779	1.1658	0.944812	0.86898	0.978226	1.22332	1.21657	1.3296
inducibleMutant_.ip.-114466606_mm_chr9:77765125$RFX5_RFX5at-22^scrRFX5_scrRFX5at-46^CREB5_CREB5at-8^CREB5_CREB5at48^scrRFX5_scrRFX5at49_1	11238	12873	7265	9211	14521	9495	8535	8696	14575	15682	23695	13326	20117	6914	7448	18091	14769	12856	10211	8068	7503	12381	6772	10972	6737	17117	ATCTGATTCTGGAATTTACAATCACGAAAGTTCTATCGCCCCAGGATCGTTGCCATGGCAACGTGACATCATAGCGCTTGATCCTGCCTCCGGGCTCGGATTGGCTGGCCGCGCCATTGTGACGTCACGGTCAGCCCA	FALSE	2.59159	2.69217	2.95744	2.02688	2.24446	2.26664	3.14781	2.68107	3.83087	2.27677	2.97966	3.09085	1.63794	1.68793	1.76858	1.29384	1.27567	1.39224	1.56603	1.80282	1.96491
inducibleMutant_.i2.-127761879_mm_chr9:77765125$RFX5_RFX5at-22^scrRFX5_scrRFX5at-46^CREB5_CREB5at-8^CREB5_CREB5at48^scrRFX5_scrRFX5at49_1	5373	5348	2985	3839	7237	3968	7619	3933	5937	6467	8879	4893	6834	5687	5624	13469	9818	8684	7074	4745	4989	8309	4258	6394	4053	9265	ATCTGATTCTGGAATTTACAATCACGAAAGTTCTATCGCCCCAGGATTCGTTCCAAGGCCTCATGACATCATAGCGCTTGATCCTGCCTCCGGGCTCGGATTGGCTGGCCGCGCCATTGTGACGTCACGGTCAGCCCA	FALSE	1.18064	1.20178	1.22144	1.1145	1.11152	1.1364	1.46969	1.49684	1.79341	1.21942	1.3867	1.42263	1.16046	1.23455	1.16383	1.04594	1.04082	1.06426	1.28606	1.51843	1.40494
inducibleMutant_.i1.538977680_mm_chr9:77765125$RFX5_RFX5at-22^scrRFX5_scrRFX5at-46^CREB5_CREB5at-8^CREB5_CREB5at48^scrRFX5_scrRFX5at49_1	5252	5201	2629	3388	7721	3743	6717	3705	5685	6305	8879	5068	6772	6136	5430	12719	9408	8086	6570	4655	4993	8091	4129	6220	3891	9761	ATCTGATTCTGGAATTTACAATCACGAAAGTTCTATCGCCCCAGGATTGATTCCAAGGCCGGATGACATCATAGCGCTTGATCCTGCCTCCGGGCTCGGATTGGCTGGCCGCGCCATTGTGACGTCACGGTCAGCCCA	FALSE	1.09425	1.15367	1.1218	0.973064	0.986456	1.02686	1.47121	1.81139	1.91889	1.35202	1.52968	1.42122	1.04628	1.09848	1.13641	0.970179	0.939349	0.956503	1.10987	1.30706	1.27744
inducibleMutant_.ip.553900163_mm_chr9:77765125$CREB5_CREB5at-8^scrRFX5_scrRFX5at-46^RFX5_RFX5at-22^CREB5_CREB5at48^scrRFX5_scrRFX5at49_1	631	600	316	402	839	509	744	353	683	727	1029	618	823	416	620	1431	1173	1256	740	575	469	1019	491	752	409	1094	ATCTGATTCTGGAATTTACAATCACGAAAGTTCTATCGCCCCAGGATTGGTTCCAAGGCCGAATGACGTCACCGCGCTTGATCCTGCCTCCGGGCTCGGATTGGCTGGCCGCGCCATTGTGACGTCACGGTCAGCCCA	FALSE	1.87051	2.07504	2.01089	1.36748	1.74807	1.74643	1.57601	1.77707	2.35587	1.46653	1.59319	1.54227	1.86581	1.70313	1.87867	1.34417	1.74498	1.6777	2.54285	2.17146	2.32745
inducibleMutant_.i2.-2125173817_mm_chr9:77765125$CREB5_CREB5at-8^scrRFX5_scrRFX5at-46^RFX5_RFX5at-22^CREB5_CREB5at48^scrRFX5_scrRFX5at49_1	5151	5176	2648	3162	6312	2935	6988	3763	6055	6257	7804	4258	5742	5707	5598	13002	10291	7592	5534	4168	5489	8811	4501	5947	3417	8208	ATCTGATTCTGGAATTTACAATCACGAAAGTTCTATCGCCCCAGGATTGGTTCCAAGGCCGCAGGCCATCATAGCGCTTGATCCTGCCTCCGGGCTCGGATTGGCTGGCCGCGCCATTGTGACGTCACGGTCAGCCCA	FALSE	1.03406	1.04215	1.02267	1.06259	1.12964	1.09564	1.31982	1.42341	1.44631	1.2746	1.46329	1.37598	1.07555	1.03718	1.02744	1.14673	1.09984	1.12106	1.1204	1.18371	1.22977
inducibleMutant_.i1.-393487811_mm_chr9:77765125$CREB5_CREB5at-8^scrRFX5_scrRFX5at-46^RFX5_RFX5at-22^CREB5_CREB5at48^scrRFX5_scrRFX5at49_1	8340	8077	4533	5566	10529	5354	12480	5648	8612	9018	11855	6251	8846	8022	9895	20729	17893	13932	10448	7395	7337	12145	6424	8419	5115	12423	ATCTGATTCTGGAATTTACAATCACGAAAGTTCTATCGCCCCAGGATTGGTTCCAAGGCCGCATGACAGCCTAGCGCTTGATCCTGCCTCCGGGCTCGGATTGGCTGGCCGCGCCATTGTGACGTCACGGTCAGCCCA	FALSE	1.11752	1.08843	1.12085	1.13462	1.14302	1.12341	1.30087	1.3295	1.4773	1.15554	1.27857	1.31892	1.08323	1.10454	1.10629	1.09046	1.07851	1.13828	1.4627	1.58988	1.55225
inducibleMutant_.ip.1690945097_mm_chr9:77765125$CREB5_CREB5at48^scrRFX5_scrRFX5at-46^RFX5_RFX5at-22^CREB5_CREB5at-8^scrRFX5_scrRFX5at49_1	1537	1489	844	1168	2182	1156	2531	1277	2037	2130	2964	1694	2387	1703	1677	3770	2861	2879	1947	1381	1923	3051	1863	2282	1466	3063	ATCTGATTCTGGAATTTACAATCACGAAAGTTCTATCGCCCCAGGATTGGTTCCAAGGCCGCATGACATCATAGCGCTTGATCCTGCCTCCGGGCTCGGATTGGCTGGCCGCGCCATAATGACGTCACCGTCAGCCCA	FALSE	1.31614	1.38941	1.42469	1.20841	1.27353	1.2499	1.34603	1.35856	1.57279	1.05006	1.16223	1.21087	1.38307	1.4912	1.28487	1.3463	1.27626	1.55498	1.42381	1.39561	1.36548
inducibleMutant_.If.-705812981_mm_chr9:77765125$CREB5_CREB5at48^scrRFX5_scrRFX5at-46^RFX5_RFX5at-22^CREB5_CREB5at-8^scrRFX5_scrRFX5at49_1	1565	1548	729	1430	2605	1242	2932	1316	1941	2324	3228	1971	2662	1948	2036	4075	2876	3575	2348	1507	1603	2601	1387	2410	1510	3505	ATCTGATTCTGGAATTTACAATCACGAAAGTTCTATCGCCCCAGGATTGGTTCCAAGGCCGCATGACATCATAGCGCTTGATCCTGCCTCCGGGCTCGGATTGGCTGGCCGCGCCATACACTGCAGTGCGTCAGCCCA	FALSE	1.25309	1.41329	1.389	1.08869	1.06089	1.19222	1.42258	1.4001	1.45869	0.922964	1.04303	0.902838	1.27694	1.34278	1.28536	0.981116	0.951178	1.01208	1.54565	1.47137	1.30266
inducibleMutant_.If.-1303580454_mm_chr9:77765125$scrRFX5_scrRFX5at49^scrRFX5_scrRFX5at-46^RFX5_RFX5at-22^CREB5_CREB5at-8^CREB5_CREB5at48_1	1301	1259	672	715	1630	718	2621	1120	1623	1771	2627	1419	1973	2183	1458	3464	2989	2425	1529	1183	1396	2492	1099	2001	1063	2663	ATCTGATTCTGGAATTTACAATCACGAAAGTTCTATCGCCCCAGGATTGGTTCCAAGGCCGCATGACATCATAGCGCTTGATCCTGCCTCCGGGCTCGGATTGGCTGGCCGCGCCATTCACTGCAGTGCCAGTCCCCA	FALSE	0.910007	0.907948	0.918661	0.826805	0.791584	0.810729	0.795691	0.980021	0.94333	0.858311	0.948962	0.930998	0.946097	0.843522	0.871451	0.762443	0.813214	0.7156	0.935584	0.855004	0.912507
inducibleMutant_.ip.577937088_mm_chr9:77765125$scrRFX5_scrRFX5at49^scrRFX5_scrRFX5at-46^RFX5_RFX5at-22^CREB5_CREB5at-8^CREB5_CREB5at48_1	4459	4292	2319	3172	6051	2855	10651	4859	7354	8509	10114	5913	7559	8415	5119	10944	8728	7808	5753	4197	6519	10138	5449	7593	4610	10993	ATCTGATTCTGGAATTTACAATCACGAAAGTTCTATCGCCCCAGGATTGGTTCCAAGGCCGCATGACATCATAGCGCTTGATCCTGCCTCCGGGCTCGGATTGGCTGGCCGCGCCATTCCGAGAGTGATGCTCCCCCA	FALSE	0.908881	0.98149	0.913045	0.930532	0.930469	1.0105	0.868657	0.895265	0.923043	0.723905	0.796085	0.7906	0.931326	0.948995	0.933228	0.92364	0.858239	0.920427	0.781467	0.834554	0.839828
inducibleMutant_.i2.-1027502393_mm_chr9:77765125$CREB5_CREB5at48^scrRFX5_scrRFX5at-46^RFX5_RFX5at-22^CREB5_CREB5at-8^scrRFX5_scrRFX5at49_1	3754	3334	1769	2237	4208	2242	6186	3045	4406	4816	6371	3505	4696	4497	4091	8942	7633	5537	3995	2977	3902	6816	3393	4700	2821	6766	ATCTGATTCTGGAATTTACAATCACGAAAGTTCTATCGCCCCAGGATTGGTTCCAAGGCCGCATGACATCATAGCGCTTGATCCTGCCTCCGGGCTCGGATTGGCTGGCCGCGCCATTGGGCCGTCACGGTCAGCCCA	FALSE	1.07133	1.08867	1.06142	1.0912	1.04317	1.07022	1.05478	1.07196	1.24805	1.04935	1.06474	1.0384	1.07874	1.08667	1.07482	1.03452	1.07973	1.07248	1.03699	1.08445	1.11471
inducibleMutant_.i1.708106045_mm_chr9:77765125$CREB5_CREB5at48^scrRFX5_scrRFX5at-46^RFX5_RFX5at-22^CREB5_CREB5at-8^scrRFX5_scrRFX5at49_1	3569	3371	1715	2037	3510	1905	5857	3065	4599	5114	6970	3565	5012	5113	3572	8430	6490	5072	3460	2473	3999	6617	3459	4610	2913	7237	ATCTGATTCTGGAATTTACAATCACGAAAGTTCTATCGCCCCAGGATTGGTTCCAAGGCCGCATGACATCATAGCGCTTGATCCTGCCTCCGGGCTCGGATTGGCTGGCCGCGCCATTGTGACGGCCCGGTCAGCCCA	FALSE	1.03085	0.973903	0.996362	0.966036	0.957679	0.99953	1.01443	0.94438	1.12002	1.05367	1.13703	1.06325	0.930609	0.986919	1.01113	0.932505	0.921925	0.961615	0.835465	0.826066	0.81443
inducibleMutant_.i1.-648273192_mm_chr9:77765125$scrRFX5_scrRFX5at49^scrRFX5_scrRFX5at-46^RFX5_RFX5at-22^CREB5_CREB5at-8^CREB5_CREB5at48_1	4804	4186	2408	3113	5988	3169	7195	3240	4924	5106	7655	4225	6031	4809	5094	10916	9039	8398	5705	4056	4259	7416	3648	6034	3682	9071	ATCTGATTCTGGAATTTACAATCACGAAAGTTCTATCGCCCCAGGATTGGTTCCAAGGCCGCATGACATCATAGCGCTTGATCCTGCCTCCGGGCTCGGATTGGCTGGCCGCGCCATTGTGACGTCACAGTCAGCCCA	FALSE	1.20373	1.22717	1.27473	1.08575	1.09017	1.06105	1.26198	1.31149	1.51669	1.15453	1.14937	1.21527	1.29507	1.32631	1.34749	1.05591	1.09856	1.07827	1.47077	1.44816	1.4202
inducible_.chr9:77765125_base_inducible_1	9066	8757	4887	5944	11575	5834	12749	5961	9177	9629	14980	7988	10917	9492	10001	22916	17795	14044	10368	7539	7738	13797	7268	10729	6725	15848	ATCTGATTCTGGAATTTACAATCACGAAAGTTCTATCGCCCCAGGATTGGTTCCAAGGCCGCATGACATCATAGCGCTTGATCCTGCCTCCGGGCTCGGATTGGCTGGCCGCGCCATTGTGACGTCACGGTCAGCCCA	FALSE	1.19342	1.17547	1.16904	1.01205	1.02938	1.01376	1.3599	1.43074	1.57578	1.22963	1.35697	1.39191	1.16666	1.2273	1.19273	0.971956	1.03547	1.08839	1.24611	1.33337	1.3374
inducibleMutant_.i2.1050576801_mm_chr9:77765125$scrRFX5_scrRFX5at49^scrRFX5_scrRFX5at-46^RFX5_RFX5at-22^CREB5_CREB5at-8^CREB5_CREB5at48_1	5854	5726	3052	3844	6799	3963	10582	4391	7052	7338	10714	6117	8251	7361	6622	14973	11521	8438	7396	5245	6006	9484	4944	8004	4738	11720	ATCTGATTCTGGAATTTACAATCACGAAAGTTCTATCGCCCCAGGATTGGTTCCAAGGCCGCATGACATCATAGCGCTTGATCCTGCCTCCGGGCTCGGATTGGCTGGCCGCGCCATTGTGTCGTCACGCTCAGCCCA	FALSE	1.10066	1.16074	1.13934	0.961314	1.02002	0.996212	1.05955	1.01249	1.28962	0.956576	1.06899	1.04728	1.12231	1.115	1.13741	0.972801	0.917836	0.954703	0.965445	1.22652	1.19981
inducibleMutant_.If.-1533735052_mm_chr9:77765125$CREB5_CREB5at-8^scrRFX5_scrRFX5at-46^RFX5_RFX5at-22^CREB5_CREB5at48^scrRFX5_scrRFX5at49_1	7090	7152	3509	4578	9287	4713	9463	5316	7946	8726	11288	6209	8538	8613	7869	18203	14396	11706	8081	6156	6438	11802	5983	7881	5020	11792	ATCTGATTCTGGAATTTACAATCACGAAAGTTCTATCGCCCCAGGATTGGTTCCAAGGCCGGTACTGTAGTATGCGCTTGATCCTGCCTCCGGGCTCGGATTGGCTGGCCGCGCCATTGTGACGTCACGGTCAGCCCA	FALSE	0.991062	1.00693	1.00759	0.994647	0.98226	1.01245	1.41108	1.54654	1.71504	1.29554	1.4931	1.34648	0.944429	1.00964	0.978045	0.891194	0.976139	0.987396	1.14467	1.14531	1.20351
inducibleMutant_.i2.-255142179_mm_chr9:77765125$scrRFX5_scrRFX5at-46^RFX5_RFX5at-22^CREB5_CREB5at-8^CREB5_CREB5at48^scrRFX5_scrRFX5at49_1	7055	6653	3638	5045	9169	4606	9055	4072	6561	7050	10469	5693	8293	6313	7424	16861	13888	11435	9170	6332	5810	9195	5232	8259	4991	12545	ATCTGATTCTGGAATTTACAATCACGTAAGTTCTCTCGCCCCAGGATTGGTTCCAAGGCCGCATGACATCATAGCGCTTGATCCTGCCTCCGGGCTCGGATTGGCTGGCCGCGCCATTGTGACGTCACGGTCAGCCCA	FALSE	1.25403	1.25961	1.33524	1.03947	1.10654	1.116	1.62509	1.59569	1.75163	1.34723	1.45151	1.45888	1.35031	1.36952	1.41958	1.09728	1.03759	1.17804	1.52555	1.77316	1.68893
inducibleMutant_.ip.723987203_mm_chr9:77765125$scrRFX5_scrRFX5at-46^RFX5_RFX5at-22^CREB5_CREB5at-8^CREB5_CREB5at48^scrRFX5_scrRFX5at49_1	8140	8393	4342	5263	9426	5192	9442	5728	9130	9723	13831	7841	11087	8053	8871	20569	15093	14172	9170	6753	7961	13034	6313	10074	6331	15199	ATCTGATTCTGGAATTTACAATCCCGAGAGTGATGCTCCCCCAGGATTGGTTCCAAGGCCGCATGACATCATAGCGCTTGATCCTGCCTCCGGGCTCGGATTGGCTGGCCGCGCCATTGTGACGTCACGGTCAGCCCA	FALSE	1.29878	1.36002	1.39939	1.14626	1.20711	1.20657	1.62583	1.57318	1.89355	1.49072	1.75608	1.66983	1.29118	1.36186	1.34829	1.17865	1.153	1.11431	1.48217	1.39004	1.41203
inducibleMutant_.i1.-1460718843_mm_chr9:77765125$scrRFX5_scrRFX5at-46^RFX5_RFX5at-22^CREB5_CREB5at-8^CREB5_CREB5at48^scrRFX5_scrRFX5at49_1	6029	5885	3035	4038	7707	3967	8565	4151	6293	6498	9689	5237	6966	6467	6900	15885	11631	10320	7207	5132	5479	8246	4528	7146	4214	10318	ATCTGATTCTGGAATTTACAATCGCGAAAGTTCAATCGCCCCAGGATTGGTTCCAAGGCCGCATGACATCATAGCGCTTGATCCTGCCTCCGGGCTCGGATTGGCTGGCCGCGCCATTGTGACGTCACGGTCAGCCCA	FALSE	1.13296	1.13113	1.09487	1.0344	1.03607	1.00412	1.37513	1.41799	1.59493	1.21717	1.3574	1.2867	1.14052	1.12878	1.13977	1.01012	0.908345	0.995246	1.34401	1.3604	1.33625
inducibleMutant_.If.-512896963_mm_chr9:77765125$scrRFX5_scrRFX5at-46^RFX5_RFX5at-22^CREB5_CREB5at-8^CREB5_CREB5at48^scrRFX5_scrRFX5at49_1	7269	7397	3894	4958	8938	4168	7936	5053	7418	8121	11673	6434	8897	7427	7842	17620	13853	12155	8468	6071	6804	10981	5664	9032	5280	13410	ATCTGATTCTGGAATTTACAATCTGCTTTCAAGATAGCGCCCAGGATTGGTTCCAAGGCCGCATGACATCATAGCGCTTGATCCTGCCTCCGGGCTCGGATTGGCTGGCCGCGCCATTGTGACGTCACGGTCAGCCCA	FALSE	1.18852	1.21004	1.21762	1.09641	1.06342	1.09271	1.82226	1.77482	1.80856	1.58383	1.84138	1.78173	1.2552	1.23151	1.28986	1.09226	1.05327	1.08402	1.37837	1.39182	1.37642
RFXgreatMutant_.If.680182426_mm_chr8:133855865$RFX5_RFX5at-20^scrRFX5_scrRFX5at51_1	3809	3795	1652	2234	3741	1710	5299	2883	4643	4699	6083	3287	4548	4160	3784	9615	7202	5103	3289	2419	3743	6840	3327	4529	2676	6305	ATCTGCACTTCCCAGCTGGAGCTGTCACAAAAGATGGACCATCTGCTGGACAATGGTATCATTGATGTCTCGCCTCACTTTTCAGTGGGCGGCTTGTGCGCTCAGATGTAGCCATGACTGGGGAAATTACGCTGAGAG	FALSE	1.10576	1.10367	1.11124	1.11684	1.18833	1.12882	1.22969	1.11252	1.11124	1.24294	1.41484	1.13204	1.1237	1.11432	1.08272	1.07276	1.17131	1.13681	1.03313	0.965128	0.979147
RFXgreatMutant_.i1.1944253338_mm_chr8:133855865$RFX5_RFX5at-20^scrRFX5_scrRFX5at51_1	992	1229	502	598	1252	592	1543	571	909	915	1269	685	861	958	1261	2602	2078	1520	943	720	813	1309	606	881	506	1307	ATCTGCACTTCCCAGCTGGAGCTGTCACAAAAGATGGACCATCTGCTGGTGATACCATAGTAAGTTGTCTCGCCTCACTTTTCAGTGGGCGGCTTGTGCGCTCAGATGTAGCCATGACTGGGGAAATTACGCTGAGAG	FALSE	1.00169	0.998751	0.913523	0.960526	1.01025	0.954479	1.13042	1.27865	1.32118	1.11168	1.57353	1.18137	0.949189	0.91496	0.974621	1.01181	0.973385	0.899153	1.3363	1.2016	1.26553
RFXgreatMutant_.If.122118225_mm_chr8:133855865$scrRFX5_scrRFX5at51^RFX5_RFX5at-20_1	13897	15740	7663	4505	8365	4275	9801	5552	8709	9064	9844	5052	7095	6216	7857	17354	13541	9922	6609	4803	5894	9688	5015	6503	3846	9541	ATCTGCACTTCCCAGCTGGAGCTGTCACAAAAGATGGACCATCTGCTGGTGTTACCATAGTAACTTGTCTCGCCTCACTTTTCAGTGGGCGGCTTGTGCGCTCAGATGTAGCCATGACTGCCCTTTAATGCGACTCAG	FALSE	1.19756	1.13523	1.16017	1.43939	1.49173	1.4572	1.3407	1.34496	1.50201	2.4518	3.17267	2.83906	1.0798	1.0718	1.0965	1.13051	1.11028	1.1468	1.34435	1.29789	1.30109
RFXgreatMutant_.i1.1776911151_mm_chr8:133855865$scrRFX5_scrRFX5at51^RFX5_RFX5at-20_1	6267	7114	3685	1511	3346	1420	3144	2453	4024	4225	4237	2461	3247	2545	2836	6199	4929	3715	2239	1495	2272	4046	1975	2844	1596	3933	ATCTGCACTTCCCAGCTGGAGCTGTCACAAAAGATGGACCATCTGCTGGTGTTACCATAGTAACTTGTCTCGCCTCACTTTTCAGTGGGCGGCTTGTGCGCTCAGATGTAGCCATGACTGGGGAAATTACACTGAGAG	FALSE	1.25895	1.35069	1.29681	1.55328	1.68346	1.65901	1.4018	1.6771	1.55529	3.44676	4.47014	4.256	1.15341	1.08633	1.10398	1.06438	1.13253	1.10308	1.22941	1.07394	0.989142
putativeConstitWgreatRFXsite_.chr8:133855865_base_RFX25_great_tiles_from_constitK27_CBP_peaks_1	10758	12695	6195	3518	6082	3127	5781	3808	5984	6386	6733	3514	4875	3874	4979	10769	9070	5435	3973	3030	3615	5960	3080	3972	2399	6013	ATCTGCACTTCCCAGCTGGAGCTGTCACAAAAGATGGACCATCTGCTGGTGTTACCATAGTAACTTGTCTCGCCTCACTTTTCAGTGGGCGGCTTGTGCGCTCAGATGTAGCCATGACTGGGGAAATTACGCTGAGAG	FALSE	1.31428	1.26699	1.27908	1.58408	1.64462	1.64733	1.775	1.6579	1.86265	3.21783	4.3383	3.89121	1.05826	1.07272	1.10881	1.11256	1.09597	1.1301	1.18158	1.25191	1.31701
RFXgreatMutant_.If.-1416674441_mm_chr9:98387360$scrRFX5_scrRFX5at-59^RFX5_RFX5at19_1	31444	32891	15858	20146	36780	16364	23950	16585	23938	25432	26580	13857	18637	18425	24214	49365	40267	34417	22924	15320	17964	27625	13803	17384	10492	25446	ATGCAGGTCACGATGTGTTATGGGTACTTCCAGTACTGAGAAGGAGGAGAAAGATTAGGCCTGCTTCCAAATAGCAGGCCTGCCTGCTTGTTACCGTGGTAACCTCCTTTCCCTGAGCTGCTCTCATTTGTCTCTCTC	FALSE	1.0909	1.05049	1.02814	1.4506	1.38329	1.37938	2.45352	2.42003	2.35283	2.27021	2.71307	2.4043	0.973833	0.986433	0.986592	1.16244	1.06808	1.06486	1.57322	1.51879	1.40009
RFXgreatMutant_.If.-1566452386_mm_chr9:98387360$RFX5_RFX5at19^scrRFX5_scrRFX5at-59_1	6366	6245	2817	3218	6657	2910	9126	4327	6626	6748	9318	4890	6673	6941	7293	16004	12324	9060	6096	4182	5864	9404	4894	6781	3948	9210	ATGCAGGTCAGCTACACAATACCCATCTTCCAGTACTGAGAAGGAGGAGAAAGATTAGGCCTGCTTCCAAATAGCAGGCCTGCCTGCTACAATGGCACCATTGGTCCTTTCCCTGAGCTGCTCTCATTTGTCTCTCTC	FALSE	1.01517	0.984054	0.977195	1.00462	1.01639	0.971547	1.02852	1.14951	1.09804	1.2062	1.35189	1.12086	1.00836	0.985308	0.947901	1.00727	0.965163	1.00223	1.09934	1.0721	1.01454
RFXgreatMutant_.i1.1609980533_mm_chr9:98387360$RFX5_RFX5at19^scrRFX5_scrRFX5at-59_1	3596	3703	1777	1761	3808	1816	4986	2264	3459	3813	5061	2881	3591	3652	4313	9791	7015	5397	3684	2481	3060	5370	2631	3867	2135	5194	ATGCAGGTCAGCTACACAATACCCATCTTCCAGTACTGAGAAGGAGGAGAAAGATTAGGCCTGCTTCCAAATAGCAGGCCTGCCTGCTTGATACCGTGGTAAGCTCCTTTCCCTGAGCTGCTCTCATTTGTCTCTCTC	FALSE	1.04796	1.10191	0.999463	0.999043	1.00845	1.04339	1.03018	1.20354	1.25421	1.2471	1.46721	1.29414	1.09291	1.01271	1.01601	0.999002	1.0475	1.02404	1.24465	1.23141	1.14394
putativeConstitWgreatRFXsite_.chr9:98387360_base_RFX25_great_tiles_from_constitK27_CBP_peaks_1	34880	40171	19562	11858	23621	10459	22134	13895	21701	22551	20008	11018	15205	14854	19070	41858	32465	24701	15966	10787	12893	21553	10942	14644	8777	20974	ATGCAGGTCAGCTACACAATACCCATCTTCCAGTACTGAGAAGGAGGAGAAAGATTAGGCCTGCTTCCAAATAGCAGGCCTGCCTGCTTGTTACCGTGGTAACCTCCTTTCCCTGAGCTGCTCTCATTTGTCTCTCTC	FALSE	1.01859	1.03608	1.04046	1.50749	1.5555	1.51717	1.56263	1.68172	1.62718	2.7249	3.58544	3.20922	1.01756	1.02357	1.0087	1.03487	1.03365	1.04708	1.40054	1.3121	1.22282
inducibleMutant_.ip.-629405802_mm_chr9:137097980$scrCREB5_scrCREB5at-58^RFX5_RFX5at-30^RFX5_RFX5at-22^RFX5_RFX5at-21^CREB5_CREB5at0^scrRFX5_scrRFX5at1^scrRFX5_scrRFX5at13_1	2704	3154	1484	2589	5242	2777	1960	2045	3317	3691	5999	3239	4580	2083	2069	4677	3391	3128	2469	1938	2197	3452	1761	3154	1873	4456	ATGTGACTTTAAACCCTCAAGGTATTAGAGCCTCCCAAACGTTGTCGGGGTTGCTAGGCAACCCCCCGAGATGACATCACTCACACAAGCCACGCTGCGGCGATGTCATCTCTACATATTTATAGCGCCTCTGCAGAG	FALSE	2.17785	2.17197	2.2349	1.58213	1.69546	1.77078	3.85285	4.21459	4.87895	2.38553	3.17904	2.74931	1.56284	1.55763	1.5282	1.25752	1.18057	1.2017	1.26474	1.44693	1.56664
inducibleMutant_.If.-967963608_mm_chr9:137097980$scrCREB5_scrCREB5at-58^RFX5_RFX5at-30^RFX5_RFX5at-22^RFX5_RFX5at-21^CREB5_CREB5at0^scrRFX5_scrRFX5at1^scrRFX5_scrRFX5at13_1	1945	2202	1027	2132	3856	2138	1404	1324	2167	2277	3723	2240	2903	1306	1290	2894	2394	2714	1946	1576	1282	2081	1084	1880	1124	2738	ATGTGACTTTAAGGGTGAGTTCTATTAGAGCCTCCCAAACGTTGTCGGGGTTGCTAGGCAACCCCCCGAGATGACATCACTCACACAAGCCACGCTGCGGCGATGTCATCTCTACATATTTATAGCGCCTCTGCAGAG	FALSE	2.1557	2.39573	2.25936	1.63374	1.76664	1.74233	4.4292	4.32797	5.24381	2.39545	3.09842	2.65613	1.48579	1.49087	1.49767	1.17036	1.13511	1.17981	1.75022	1.81892	2.03198
inducibleMutant_.i2.-2098842361_mm_chr9:137097980$scrCREB5_scrCREB5at-58^RFX5_RFX5at-30^RFX5_RFX5at-22^RFX5_RFX5at-21^CREB5_CREB5at0^scrRFX5_scrRFX5at1^scrRFX5_scrRFX5at13_1	2316	2608	1262	2136	4295	2426	2101	2068	3242	3595	5215	3017	3959	1796	1606	4098	2657	3113	2227	1668	1999	3373	1827	2529	1632	4272	ATGTGACTTTACCCCACTCAAGGATTAGAGCCTCCCAAACGTTGTCGGGGTTGCTAGGCAACCCCCCGAGATGACATCACTCACACAAGCCACGCTGCGGCGATGTCATCTCTACATATTTATAGCGCCTCTGCAGAG	FALSE	2.19577	2.3464	2.24058	1.85559	1.92194	2.00034	2.96538	3.22145	3.97623	1.90611	2.45229	2.18112	1.4534	1.57409	1.69922	1.32703	1.33789	1.44597	1.45981	1.51366	1.56385
inducibleMutant_.i2.-827238219_mm_chr9:137097980$RFX5_RFX5at-30^scrCREB5_scrCREB5at-58^RFX5_RFX5at-22^RFX5_RFX5at-21^CREB5_CREB5at0^scrRFX5_scrRFX5at1^scrRFX5_scrRFX5at13_1	648	718	327	529	1273	651	770	417	547	602	1140	641	897	609	711	1286	1308	1141	780	630	586	785	437	632	435	1033	ATGTGACTTTATCCCACTCAAGAATTAGAGCCTCCCAAACCTTGTCGGGGTTTCTAGGCAACCCCCCGAGATGACATCACTCACACAAGCCACGCTGCGGCGATGTCATCTCTACATATTTATAGCGCCTCTGCAGAG	FALSE	1.41555	1.47019	1.49712	1.10346	0.956318	0.987848	2.00387	2.60527	2.91136	1.45519	1.84214	1.54207	1.07113	1.23734	1.21174	1.14724	0.918254	1.01998	1.57795	1.56348	1.74192
inducibleMutant_.i1.-1219034865_mm_chr9:137097980$RFX5_RFX5at-30^scrCREB5_scrCREB5at-58^RFX5_RFX5at-22^RFX5_RFX5at-21^CREB5_CREB5at0^scrRFX5_scrRFX5at1^scrRFX5_scrRFX5at13_1	422	421	183	390	787	313	763	394	653	726	1157	620	830	574	462	1273	830	729	584	353	631	975	438	817	475	1196	ATGTGACTTTATCCCACTCAAGAATTAGAGCCTCCCAAACGATGTCGGGGTTGGTAGGCAACCCCCCGAGATGACATCACTCACACAAGCCACGCTGCGGCGATGTCATCTCTACATATTTATAGCGCCTCTGCAGAG	FALSE	1.52426	1.50873	1.46977	1.10617	1.21125	1.26397	1.49089	1.62542	1.41262	0.956362	1.09005	0.87091	1.4691	1.4335	1.48849	1.31067	1.21005	1.08465	1.06965	1.24198	1.03554
inducibleMutant_.ip.-1511381005_mm_chr9:137097980$RFX5_RFX5at-30^scrCREB5_scrCREB5at-58^RFX5_RFX5at-22^RFX5_RFX5at-21^CREB5_CREB5at0^scrRFX5_scrRFX5at1^scrRFX5_scrRFX5at13_1	807	1051	519	1133	2432	1324	930	652	1094	1096	2171	1178	1664	668	790	1831	1455	1301	978	605	647	1439	604	1011	592	1327	ATGTGACTTTATCCCACTCAAGAATTAGAGCCTCCCAAACGTTGCCATGGCAACGAGGCAACCCCCCGAGATGACATCACTCACACAAGCCACGCTGCGGCGATGTCATCTCTACATATTTATAGCGCCTCTGCAGAG	FALSE	2.45766	2.46321	2.53197	1.57293	1.74371	1.63963	3.55347	4.12093	4.90243	1.50046	2.23259	2.02643	1.56213	1.53519	1.41912	1.15479	1.5346	1.28525	1.64031	1.78721	1.52505
inducibleMutant_.If.-835879644_mm_chr9:137097980$RFX5_RFX5at-22^scrCREB5_scrCREB5at-58^RFX5_RFX5at-30^RFX5_RFX5at-21^CREB5_CREB5at0^scrRFX5_scrRFX5at1^scrRFX5_scrRFX5at13_1	2039	1909	869	1206	2354	1047	2887	1190	1873	1943	2927	1512	2027	2220	1984	4723	3460	3129	1787	1271	1911	2682	1293	2102	1258	3012	ATGTGACTTTATCCCACTCAAGAATTAGAGCCTCCCAAACGTTGTCGCCCAACGATCCGTTGGCCCCGAGATGACATCACTCACACAAGCCACGCTGCGGCGATGTCATCTCTACATATTTATAGCGCCTCTGCAGAG	FALSE	0.997029	0.95133	0.928074	0.863839	0.898292	0.874642	1.21845	1.28491	1.24884	1.22125	1.30632	1.093	0.977287	0.981623	0.969232	1.02632	0.860629	0.827889	1.18707	0.98262	0.964046
inducibleMutant_.ip.-1976436704_mm_chr9:137097980$RFX5_RFX5at-22^scrCREB5_scrCREB5at-58^RFX5_RFX5at-30^RFX5_RFX5at-21^CREB5_CREB5at0^scrRFX5_scrRFX5at1^scrRFX5_scrRFX5at13_1	2442	2608	1369	1982	4219	2182	2415	1796	2707	3076	4241	2545	3273	2019	1717	4630	3178	2553	1687	1194	1705	2861	1582	2092	1208	3035	ATGTGACTTTATCCCACTCAAGAATTAGAGCCTCCCAAACGTTGTCGCGTTGCCATGGCAACGCCCCGAGATGACATCACTCACACAAGCCACGCTGCGGCGATGTCATCTCTACATATTTATAGCGCCTCTGCAGAG	FALSE	1.58844	1.76069	1.64775	1.43354	1.42753	1.52251	2.39382	2.75301	3.11131	1.74849	2.13344	2.05841	1.06947	1.03645	1.07386	1.00685	1.00947	1.11377	1.06497	1.01998	0.995803
inducibleMutant_.If.-1248834772_mm_chr9:137097980$RFX5_RFX5at-21^scrCREB5_scrCREB5at-58^RFX5_RFX5at-30^RFX5_RFX5at-22^CREB5_CREB5at0^scrRFX5_scrRFX5at1^scrRFX5_scrRFX5at13_1	1601	1486	771	1070	2601	1197	2572	1446	2103	2379	3065	1703	2121	2104	1889	3838	2820	2918	1696	1326	1953	3434	1641	2356	1305	3396	ATGTGACTTTATCCCACTCAAGAATTAGAGCCTCCCAAACGTTGTCGGCCAACGATCCGTTGGGCCCGAGATGACATCACTCACACAAGCCACGCTGCGGCGATGTCATCTCTACATATTTATAGCGCCTCTGCAGAG	FALSE	1.1016	1.13058	1.02465	1.10754	1.06421	1.12995	1.21344	1.59362	1.60262	1.07635	1.1414	1.0885	1.15577	1.07444	1.15305	1.10671	1.16269	1.10864	1.16806	0.983998	1.06121
inducibleMutant_.ip.1824711654_mm_chr9:137097980$RFX5_RFX5at-21^scrCREB5_scrCREB5at-58^RFX5_RFX5at-30^RFX5_RFX5at-22^CREB5_CREB5at0^scrRFX5_scrRFX5at1^scrRFX5_scrRFX5at13_1	2064	2555	1212	2470	4295	2361	1936	2289	3795	4202	6505	4103	4976	2113	1224	3809	2659	2542	2175	1342	2001	3418	1837	2869	1775	4121	ATGTGACTTTATCCCACTCAAGAATTAGAGCCTCCCAAACGTTGTCGGCGTTGCCATGGCAACGCCCGAGATGACATCACTCACACAAGCCACGCTGCGGCGATGTCATCTCTACATATTTATAGCGCCTCTGCAGAG	FALSE	2.32802	2.71228	2.39366	1.74576	1.91225	1.98732	3.72132	3.49601	4.19949	1.84348	2.60721	2.27323	1.40144	1.45518	1.39325	1.12908	1.15235	1.23577	1.01321	1.25653	1.06944
inducibleMutant_.i2.1569966447_mm_chr9:137097980$RFX5_RFX5at-22^scrCREB5_scrCREB5at-58^RFX5_RFX5at-30^RFX5_RFX5at-21^CREB5_CREB5at0^scrRFX5_scrRFX5at1^scrRFX5_scrRFX5at13_1	84	70	40	56	189	146	117	54	76	88	131	64	129	154	91	120	134	227	94	64	53	58	30	71	37	100	ATGTGACTTTATCCCACTCAAGAATTAGAGCCTCCCAAACGTTGTCGGCGTTGCTAGGCATCCCCCCGAGATGACATCACTCACACAAGCCACGCTGCGGCGATGTCATCTCTACATATTTATAGCGCCTCTGCAGAG	FALSE	0.643263	0.580486	0.851434	0.565082	0.525443	0.571048	1.39607	2.5456	4.29708	1.24145	1.18196	1.24143	0.475861	0.416196	0.463879	0.410328	0.268298	0.276903	1.24145	0.745112	0.699785
inducibleMutant_.i1.-280394980_mm_chr9:137097980$RFX5_RFX5at-22^scrCREB5_scrCREB5at-58^RFX5_RFX5at-30^RFX5_RFX5at-21^CREB5_CREB5at0^scrRFX5_scrRFX5at1^scrRFX5_scrRFX5at13_1	189	195	91	248	274	130	294	139	253	259	492	222	299	318	306	490	441	375	194	188	207	329	186	250	193	464	ATGTGACTTTATCCCACTCAAGAATTAGAGCCTCCCAAACGTTGTCGGGATTGCTAGGCAAGCCCCCGAGATGACATCACTCACACAAGCCACGCTGCGGCGATGTCATCTCTACATATTTATAGCGCCTCTGCAGAG	FALSE	1.16997	0.97512	0.95571	0.704411	0.847083	0.813923	2.46042	1.46865	1.52266	1.1116	1.31032	1.12393	0.811438	1.05135	1.04236	0.776102	0.73702	0.831405	0.993182	0.744713	0.995488
inducibleMutant_.i2.-875202133_mm_chr9:137097980$RFX5_RFX5at-21^scrCREB5_scrCREB5at-58^RFX5_RFX5at-30^RFX5_RFX5at-22^CREB5_CREB5at0^scrRFX5_scrRFX5at1^scrRFX5_scrRFX5at13_1	164	146	47	100	276	96	300	89	128	205	246	160	221	190	139	387	319	356	180	118	112	297	111	240	94	279	ATGTGACTTTATCCCACTCAAGAATTAGAGCCTCCCAAACGTTGTCGGGCTTGCTAGGCAATCCCCCGAGATGACATCACTCACACAAGCCACGCTGCGGCGATGTCATCTCTACATATTTATAGCGCCTCTGCAGAG	FALSE	0.979083	1.17625	1.18228	0.754875	0.71728	1.07823	0.972264	1.44978	1.10194	0.945272	0.961438	0.568883	1.30377	0.85702	1.049	0.702814	1.11356	0.830417	1.57805	1.15647	1.04576
inducibleMutant_.i1.500705805_mm_chr9:137097980$RFX5_RFX5at-21^scrCREB5_scrCREB5at-58^RFX5_RFX5at-30^RFX5_RFX5at-22^CREB5_CREB5at0^scrRFX5_scrRFX5at1^scrRFX5_scrRFX5at13_1	1292	1400	646	1336	2629	1399	1657	1100	1390	1732	2997	1498	2217	1425	1136	3256	1913	2455	1707	1127	1280	2134	1066	1945	1242	2963	ATGTGACTTTATCCCACTCAAGAATTAGAGCCTCCCAAACGTTGTCGGGGATGCTAGGCAACGCCCCGAGATGACATCACTCACACAAGCCACGCTGCGGCGATGTCATCTCTACATATTTATAGCGCCTCTGCAGAG	FALSE	1.59041	1.46835	1.58137	1.24399	1.03856	1.21463	2.35174	2.50025	2.90738	1.34826	1.66915	1.41565	1.40879	1.50981	1.4854	1.07095	1.06682	1.06333	1.45098	1.46229	1.33172
inducibleMutant_.ip.334715535_mm_chr9:137097980$CREB5_CREB5at0^scrCREB5_scrCREB5at-58^RFX5_RFX5at-30^RFX5_RFX5at-22^RFX5_RFX5at-21^scrRFX5_scrRFX5at1^scrRFX5_scrRFX5at13_1	156	143	63	135	270	128	164	147	245	246	619	352	543	128	81	310	193	355	150	140	189	313	144	355	158	392	ATGTGACTTTATCCCACTCAAGAATTAGAGCCTCCCAAACGTTGTCGGGGTTGCTAGGCAACCCCCCGAAATGACGTCACCCACACAAGCCACGCTGCGGCGATGTCATCTCTACATATTTATAGCGCCTCTGCAGAG	FALSE	3.65695	3.84118	4.31193	1.85074	2.03793	1.9206	2.40102	2.59439	2.68765	1.64481	1.72259	1.3949	2.8626	2.13828	2.18777	1.76047	1.74199	1.59911	2.33584	1.43053	1.84172
inducibleMutant_.If.1008921013_mm_chr9:137097980$CREB5_CREB5at0^scrCREB5_scrCREB5at-58^RFX5_RFX5at-30^RFX5_RFX5at-22^RFX5_RFX5at-21^scrRFX5_scrRFX5at1^scrRFX5_scrRFX5at13_1	1080	1175	522	866	1604	868	1113	902	1374	1529	2034	1217	1562	1406	676	1752	970	1104	700	534	874	1576	799	1083	610	1534	ATGTGACTTTATCCCACTCAAGAATTAGAGCCTCCCAAACGTTGTCGGGGTTGCTAGGCAACCCCCCGACTACTGTAGTGACACACAAGCCACGCTGCGGCGATGTCATCTCTACATATTTATAGCGCCTCTGCAGAG	FALSE	1.09397	1.20903	1.12922	1.03386	1.04048	1.08676	2.26949	2.27104	2.68553	1.67789	2.08561	1.70303	0.795033	0.751556	0.779409	0.741143	0.798512	0.807771	0.661315	0.607753	0.639531
inducibleMutant_.i2.-722874797_mm_chr9:137097980$CREB5_CREB5at0^scrCREB5_scrCREB5at-58^RFX5_RFX5at-30^RFX5_RFX5at-22^RFX5_RFX5at-21^scrRFX5_scrRFX5at1^scrRFX5_scrRFX5at13_1	876	850	407	437	741	425	1070	771	1247	1225	1676	849	1089	1078	724	1579	972	852	533	330	793	1313	704	1006	586	1337	ATGTGACTTTATCCCACTCAAGAATTAGAGCCTCCCAAACGTTGTCGGGGTTGCTAGGCAACCCCCCGAGAGGCCATCACTCACACAAGCCACGCTGCGGCGATGTCATCTCTACATATTTATAGCGCCTCTGCAGAG	FALSE	1.17569	1.10007	1.02681	1.15259	1.23163	1.13561	1.19125	1.09131	1.36776	1.41565	1.56937	1.3812	0.963211	0.941664	0.886009	0.877062	0.867673	0.928283	0.665649	0.603563	0.515467
inducibleMutant_.i1.-417721655_mm_chr9:137097980$CREB5_CREB5at0^scrCREB5_scrCREB5at-58^RFX5_RFX5at-30^RFX5_RFX5at-22^RFX5_RFX5at-21^scrRFX5_scrRFX5at1^scrRFX5_scrRFX5at13_1	655	979	444	418	781	317	749	769	1141	1213	1461	768	1083	681	452	1271	729	693	408	278	744	1117	567	802	481	1164	ATGTGACTTTATCCCACTCAAGAATTAGAGCCTCCCAAACGTTGTCGGGGTTGCTAGGCAACCCCCCGAGATGACAGCCCTCACACAAGCCACGCTGCGGCGATGTCATCTCTACATATTTATAGCGCCTCTGCAGAG	FALSE	1.62234	1.57524	1.61645	1.81978	1.7839	1.78002	1.6278	1.64318	1.45742	1.51215	2.58221	2.15252	1.21554	1.22353	1.22104	1.30257	1.16847	1.18348	0.857059	0.731353	0.68739
inducible_.chr9:137097980_base_inducible_1	563	750	292	682	1170	672	586	742	1117	1254	2116	1051	1672	605	477	1190	618	1008	583	412	588	1123	522	996	577	1589	ATGTGACTTTATCCCACTCAAGAATTAGAGCCTCCCAAACGTTGTCGGGGTTGCTAGGCAACCCCCCGAGATGACATCACTCACACAAGCCACGCTGCGGCGATGTCATCTCTACATATTTATAGCGCCTCTGCAGAG	FALSE	2.64483	2.4265	2.80907	1.97646	1.96576	2.07135	3.39463	3.14632	3.94892	1.66129	2.52845	1.80939	1.69921	1.6521	1.87626	1.15877	1.32231	1.22643	1.40323	1.17633	1.14669
inducibleMutant_.i2.1486939819_mm_chr9:137097980$scrRFX5_scrRFX5at13^scrCREB5_scrCREB5at-58^RFX5_RFX5at-30^RFX5_RFX5at-22^RFX5_RFX5at-21^CREB5_CREB5at0^scrRFX5_scrRFX5at1_1	142	191	93	77	246	75	134	61	91	132	230	106	124	108	90	265	107	214	101	54	97	76	43	68	46	111	ATGTGACTTTATCCCACTCAAGAATTAGAGCCTCCCAAACGTTGTCGGGGTTGCTAGGCAACCCCCCGAGATGACATCACTCACATAAGCCACCCTGCGGCGATGTCATCTCTACATATTTATAGCGCCTCTGCAGAG	FALSE	1.61043	1.37093	1.16702	0.910216	0.897119	1.22141	1.67607	2.89298	1.92736	1.83239	2.81591	2.52014	0.649871	0.737821	0.734218	1.07084	0.501303	0.565941	1.66884	1.14159	0.841929
inducibleMutant_.ip.211244142_mm_chr9:137097980$scrRFX5_scrRFX5at13^scrCREB5_scrCREB5at-58^RFX5_RFX5at-30^RFX5_RFX5at-22^RFX5_RFX5at-21^CREB5_CREB5at0^scrRFX5_scrRFX5at1_1	1739	1808	892	2312	4266	2228	2047	1608	2517	2739	6138	3299	4726	2076	1387	3676	2527	2879	2004	1482	1903	3517	1658	2853	1762	4535	ATGTGACTTTATCCCACTCAAGAATTAGAGCCTCCCAAACGTTGTCGGGGTTGCTAGGCAACCCCCCGAGATGACATCACTCCCGAGAGTGATGCTCCGGCGATGTCATCTCTACATATTTATAGCGCCTCTGCAGAG	FALSE	2.23582	2.21966	2.31392	1.24824	1.29089	1.31849	3.29439	3.28411	3.74803	1.46898	1.7449	1.58232	1.41846	1.47026	1.56054	1.09292	1.20686	1.13523	1.16799	1.17838	1.20206
inducibleMutant_.i1.-158008038_mm_chr9:137097980$scrRFX5_scrRFX5at13^scrCREB5_scrCREB5at-58^RFX5_RFX5at-30^RFX5_RFX5at-22^RFX5_RFX5at-21^CREB5_CREB5at0^scrRFX5_scrRFX5at1_1	200	195	96	225	164	144	203	220	380	334	584	346	375	219	102	311	95	156	118	86	233	418	184	248	150	372	ATGTGACTTTATCCCACTCAAGAATTAGAGCCTCCCAAACGTTGTCGGGGTTGCTAGGCAACCCCCCGAGATGACATCACTCGCACAAGCCAAGCTGCGGCGATGTCATCTCTACATATTTATAGCGCCTCTGCAGAG	FALSE	2.01654	2.20681	1.74048	1.61889	1.84745	1.5241	3.2329	1.2731	2.44271	1.7036	1.8977	1.7172	1.16883	1.18649	1.21346	1.26849	1.3597	1.19426	0.599936	0.657737	0.661241
inducibleMutant_.If.483137504_mm_chr9:137097980$scrRFX5_scrRFX5at13^scrCREB5_scrCREB5at-58^RFX5_RFX5at-30^RFX5_RFX5at-22^RFX5_RFX5at-21^CREB5_CREB5at0^scrRFX5_scrRFX5at1_1	3663	3802	2018	2845	5809	2972	3516	2621	4058	4715	6692	3632	5164	3429	2552	6524	4638	4172	3008	2037	2770	4759	2227	3673	2196	5236	ATGTGACTTTATCCCACTCAAGAATTAGAGCCTCCCAAACGTTGTCGGGGTTGCTAGGCAACCCCCCGAGATGACATCACTCTGTGTTCGGTGCGACGGGCGATGTCATCTCTACATATTTATAGCGCCTCTGCAGAG	FALSE	1.4758	1.47948	1.53074	1.23179	1.26002	1.37412	2.36015	2.60356	2.91076	1.80145	2.13626	2.0841	1.10559	1.10938	1.09083	0.963137	0.988686	0.923165	1.02471	1.07084	1.0003
inducibleMutant_.i2.661917489_mm_chr9:137097980$scrRFX5_scrRFX5at1^scrCREB5_scrCREB5at-58^RFX5_RFX5at-30^RFX5_RFX5at-22^RFX5_RFX5at-21^CREB5_CREB5at0^scrRFX5_scrRFX5at13_1	976	936	469	736	1608	833	965	800	1172	1433	2672	1436	1916	974	629	1490	852	1174	746	586	818	1637	827	1309	742	1802	ATGTGACTTTATCCCACTCAAGAATTAGAGCCTCCCAAACGTTGTCGGGGTTGCTAGGCAACCCCCCGAGATGTCATCACTCACACAAGCCACGCTGCGGCGATGTCATCTCTACATATTTATAGCGCCTCTGCAGAG	FALSE	2.07451	2.05934	1.99949	1.32364	1.28115	1.47027	2.22462	2.62587	2.97251	1.74887	1.91619	1.76479	1.38715	1.31966	1.32167	1.00131	1.19729	1.20691	1.01516	0.934962	1.01308
inducibleMutant_.ip.1705086990_mm_chr9:137097980$scrRFX5_scrRFX5at1^scrCREB5_scrCREB5at-58^RFX5_RFX5at-30^RFX5_RFX5at-22^RFX5_RFX5at-21^CREB5_CREB5at0^scrRFX5_scrRFX5at13_1	2595	2577	1363	1507	3184	1610	1925	2247	3825	3961	4502	2633	3457	2345	1342	3559	2113	1838	1248	894	2068	3826	1853	2873	1418	3771	ATGTGACTTTATCCCACTCAAGAATTAGAGCCTCCCAAACGTTGTCGGGGTTGCTAGGCAACCCCCCGAGCCGAGAGTGATGCTCCAAGCCACGCTGCGGCGATGTCATCTCTACATATTTATAGCGCCTCTGCAGAG	FALSE	1.45178	1.56834	1.49844	1.54418	1.73669	1.688	2.28343	2.6065	2.88006	2.33099	2.64468	2.57106	1.26455	1.04749	1.14879	1.05144	1.16228	1.12321	0.660127	0.64966	0.641948
inducibleMutant_.If.2030564127_mm_chr9:137097980$scrRFX5_scrRFX5at1^scrCREB5_scrCREB5at-58^RFX5_RFX5at-30^RFX5_RFX5at-22^RFX5_RFX5at-21^CREB5_CREB5at0^scrRFX5_scrRFX5at13_1	1582	1806	828	781	1561	801	1584	1335	2201	2354	2399	1463	2038	1720	1003	2153	1263	1502	878	617	1501	2015	1289	1478	1000	2305	ATGTGACTTTATCCCACTCAAGAATTAGAGCCTCCCAAACGTTGTCGGGGTTGCTAGGCAACCCCCCGAGTACTGTAGTGAGTGTGAAGCCACGCTGCGGCGATGTCATCTCTACATATTTATAGCGCCTCTGCAGAG	FALSE	1.05473	1.18809	1.20436	1.25081	1.36246	1.36769	1.43814	1.55297	1.74134	1.72697	2.25244	1.89811	0.886928	1.00714	0.957344	1.04047	0.834559	1.06525	0.735472	0.623132	0.604035
inducibleMutant_.If.1841860436_mm_chr9:137097980$RFX5_RFX5at-30^scrCREB5_scrCREB5at-58^RFX5_RFX5at-22^RFX5_RFX5at-21^CREB5_CREB5at0^scrRFX5_scrRFX5at1^scrRFX5_scrRFX5at13_1	626	623	235	477	1053	578	1013	498	827	774	1140	728	1073	901	818	1578	1296	1168	787	568	630	1161	534	1053	536	1348	ATGTGACTTTATCCCACTCAAGAATTAGAGCCTCCCAAAGCAACAGCCCCAACGAAGGCAACCCCCCGAGATGACATCACTCACACAAGCCACGCTGCGGCGATGTCATCTCTACATATTTATAGCGCCTCTGCAGAG	FALSE	0.956794	1.1286	1.21048	0.890724	0.977267	0.858473	1.37346	1.63807	1.96483	1.06856	1.21498	0.842374	1.20627	1.03052	1.06879	0.833665	0.917947	0.842448	1.0918	1.06626	1.06152
inducibleMutant_.i1.1842389914_mm_chr9:137097980$scrCREB5_scrCREB5at-58^RFX5_RFX5at-30^RFX5_RFX5at-22^RFX5_RFX5at-21^CREB5_CREB5at0^scrRFX5_scrRFX5at1^scrRFX5_scrRFX5at13_1	1536	1641	929	1580	3138	2017	1317	1443	2375	2555	4385	2321	3224	1135	1044	2700	1927	1892	1592	1136	1105	2244	1083	1961	1156	2668	ATGTGACTTTATCCCAGTCAAGAATTAGAGCCTCCCAAACGTTGTCGGGGTTGCTAGGCAACCCCCCGAGATGACATCACTCACACAAGCCACGCTGCGGCGATGTCATCTCTACATATTTATAGCGCCTCTGCAGAG	FALSE	2.92154	2.85635	2.88723	2.04884	2.22792	2.2496	3.49927	3.75476	5.27383	2.01669	2.46157	2.56139	1.7833	1.76433	1.67925	1.16076	1.40844	1.35631	1.40394	1.71223	1.68534
RFXrandMutant_.If.-2088578803_mm_chr3:183313250$scrCREB5_scrCREB5at-34^CREB5_CREB5at3^RFX5_RFX5at8^scrRFX5_scrRFX5at20^CREB5_CREB5at46_1	156	129	73	114	171	65	113	224	318	420	534	284	317	212	34	153	67	107	46	38	249	434	170	314	187	479	ATTCTTTCTACTGGCTCAATTCCAGGAAATGGAATAAGACGTACTTTATGTATTTTTAAGGCAAAGAGCAGTTTTTAAGTAACCATGGCAGCACACTATTCTGAGCTCGCAGAAGTATAGCGTCACTTGGATGTTAGA	FALSE	1.90477	1.87118	1.51987	1.70275	1.59707	1.97981	2.94261	2.38469	1.9808	2.38715	2.25528	2.3458	1.52875	1.528	1.61408	1.40036	1.45836	1.13983	0.425082	0.264872	0.301824
inactive_.chr19:49375716_base_inactive_1	8147	7472	3928	4801	8591	4274	21046	9197	14155	15619	19500	10724	14799	14132	10278	21038	17788	13087	9712	6542	12297	22046	11032	14431	8639	20997	ATTGAGTCTCATAGAGGCCGACGGAGTTCACGGCACCGCTGTTCGCCCGCGCCCCTCGTGGTCGCAGAACGTATTCTAGTTGTTGACCCTACCCTTGGCTATTCTCGTTGCTTCACAATGGGGTGATCCGTTTTATTC	TRUE	1.04344	1.05995	1.06441	1.04877	1.06645	1.10449	0.665377	0.643263	0.699312	0.669364	0.701386	0.677717	1.05399	1.05895	1.0614	1.03746	1.11131	1.10963	0.77994	0.838918	0.779493
inducibleMutant_.i2.1774308049_mm_chr6:92890970$RFX5_RFX5at14^scrRFX5_scrRFX5at8^scrCREB5_scrCREB5at50^scrCREB5_scrCREB5at57_1	12806	11841	5936	13299	27984	14487	31836	7649	11585	12311	19725	10934	14551	12680	17308	36324	27465	31215	24260	16924	9946	17489	8466	14269	8466	20048	ATTGTGCGTAAGGCGCGGTGCAGTGAGCTGGGAGAGCCAGCCGCGGGAAAGTTTCTGCGTCATACGCGCGTGGTAGAAACGCACCTCGCTTGGGAATGTGAAGGACCACCCTAGTTGGGTCCAGAATTGTACATGACT	FALSE	1.17635	1.20446	1.16642	0.972129	0.972768	0.970253	1.21845	1.38518	1.56699	0.695552	0.734784	0.677052	1.16149	1.15658	1.12948	0.935201	0.982553	0.949043	2.07333	2.33553	2.24745
inducibleMutant_.i1.-900618387_mm_chr6:92890970$RFX5_RFX5at14^scrRFX5_scrRFX5at8^scrCREB5_scrCREB5at50^scrCREB5_scrCREB5at57_1	8192	8041	3992	12362	23439	13919	24148	5255	8274	8594	16032	8477	12212	9116	11048	22775	17716	25107	19756	14242	7113	11928	6074	11097	6367	16022	ATTGTGCGTAAGGCGCGGTGCAGTGAGCTGGGAGAGCCAGCCGCGGGAAAGTTTCTGCGTCATACGCGCGTGGTAGAAACGCACGACGCTTGGGAAAGTGAAGGACCACCCTAGTTGGGTCCAGAATTGTACATGACT	FALSE	1.32991	1.29888	1.36165	0.928981	0.966371	0.94211	1.49318	1.52958	1.98487	0.586601	0.657838	0.600283	1.25645	1.20989	1.25556	0.930302	0.932124	0.947103	2.31961	2.64551	2.6307
inducibleMutant_.ip.69864472_mm_chr6:92890970$scrCREB5_scrCREB5at50^scrRFX5_scrRFX5at8^RFX5_RFX5at14^scrCREB5_scrCREB5at57_1	778	880	368	863	1785	954	2241	607	954	996	1358	783	1117	1000	1094	2604	1823	1676	1506	1146	806	1497	744	1104	630	1605	ATTGTGCGTAAGGCGCGGTGCAGTGAGCTGGGAGAGCCAGCCGCGGGAAAGTTTCTGCGTCATACGCGCGTGGTAGAAACGCACGTCGCTTGGGAAAGTGAAGGACCACCCTAGTTGGGAACCCTCAAGGTCATGACT	FALSE	1.02692	1.09369	1.13536	0.978199	1.01574	0.995337	1.12325	1.25519	1.46593	0.600305	0.775766	0.596283	1.13949	1.09133	1.14657	0.960972	1.06643	1.05755	1.41156	1.8384	1.9297
inducibleMutant_.If.1759485108_mm_chr6:92890970$scrCREB5_scrCREB5at50^scrRFX5_scrRFX5at8^RFX5_RFX5at14^scrCREB5_scrCREB5at57_1	1364	1333	612	1297	2915	1418	3031	683	1050	1133	1962	1095	1368	1240	1655	3777	3222	3820	2817	1867	980	1885	830	1353	762	1818	ATTGTGCGTAAGGCGCGGTGCAGTGAGCTGGGAGAGCCAGCCGCGGGAAAGTTTCTGCGTCATACGCGCGTGGTAGAAACGCACGTCGCTTGGGAAAGTGAAGGACCACCCTAGTTGGGAGGTCTTAACATCATGACT	FALSE	1.19651	1.23346	1.12136	0.887642	0.901571	0.913101	1.24813	1.51554	1.611	0.778149	0.868829	0.733182	1.12621	1.06451	1.04736	0.94228	1.08293	0.951444	2.59458	2.77319	2.53529
inducibleMutant_.i2.212034409_mm_chr6:92890970$scrCREB5_scrCREB5at50^scrRFX5_scrRFX5at8^RFX5_RFX5at14^scrCREB5_scrCREB5at57_1	11087	10510	4718	16462	28711	17181	27393	6738	10354	10960	20043	11775	16150	10858	14439	31571	20993	35938	26486	21534	9384	15991	7855	15218	9247	22506	ATTGTGCGTAAGGCGCGGTGCAGTGAGCTGGGAGAGCCAGCCGCGGGAAAGTTTCTGCGTCATACGCGCGTGGTAGAAACGCACGTCGCTTGGGAAAGTGAAGGACCACCCTAGTTGGGCCCAGAATTGTGCATGACT	FALSE	1.39589	1.51476	1.51184	1.00005	1.01529	1.00872	1.75287	1.65167	2.15981	0.699856	0.757972	0.62541	1.44661	1.47526	1.48072	1.03042	1.04915	1.02831	2.78759	2.9777	3.33949
inducibleMutant_.If.2096649500_mm_chr6:92890970$scrCREB5_scrCREB5at57^scrRFX5_scrRFX5at8^RFX5_RFX5at14^scrCREB5_scrCREB5at50_1	6240	6334	3139	6848	13925	7187	17216	4234	6435	7022	14933	7748	10207	6900	9066	17386	13693	15319	11472	7660	6044	10734	4951	9186	5451	13116	ATTGTGCGTAAGGCGCGGTGCAGTGAGCTGGGAGAGCCAGCCGCGGGAAAGTTTCTGCGTCATACGCGCGTGGTAGAAACGCACGTCGCTTGGGAAAGTGAAGGACCACCCTAGTTGGGTCCAGAAAACATGTACTGA	FALSE	1.63658	1.56846	1.5036	0.988873	0.99296	1.017	1.16021	1.27461	1.43755	0.626739	0.726835	0.662072	1.3741	1.3685	1.35793	1.04436	1.10821	1.01993	1.86985	2.02957	1.86933
inducibleMutant_.ip.1379581589_mm_chr6:92890970$scrCREB5_scrCREB5at57^scrRFX5_scrRFX5at8^RFX5_RFX5at14^scrCREB5_scrCREB5at50_1	6889	6694	3329	6960	14121	7227	17319	4001	6045	6170	10283	5394	7413	6897	9542	19545	13985	15432	10595	7617	5427	9354	4531	7451	4225	10559	ATTGTGCGTAAGGCGCGGTGCAGTGAGCTGGGAGAGCCAGCCGCGGGAAAGTTTCTGCGTCATACGCGCGTGGTAGAAACGCACGTCGCTTGGGAAAGTGAAGGACCACCCTAGTTGGGTCCAGAAAACCCTCAAGGT	FALSE	1.12745	1.0924	1.09249	0.934861	0.933187	0.893996	1.17217	1.28486	1.43695	0.687809	0.763577	0.697971	1.11506	1.06117	1.09367	0.938156	0.966156	0.933814	1.88446	1.87523	1.85964
inducibleMutant_.i2.-1025451855_mm_chr6:92890970$scrCREB5_scrCREB5at57^scrRFX5_scrRFX5at8^RFX5_RFX5at14^scrCREB5_scrCREB5at50_1	1732	2066	1087	3081	5491	3066	5558	1396	2043	2162	4094	2263	2815	2278	2945	6324	5145	6672	4912	3571	1647	2845	1444	2876	1543	3868	ATTGTGCGTAAGGCGCGGTGCAGTGAGCTGGGAGAGCCAGCCGCGGGAAAGTTTCTGCGTCATACGCGCGTGGTAGAAACGCACGTCGCTTGGGAAAGTGAAGGACCACCCTAGTTGGGTCCAGAACTGTACATGACT	FALSE	1.35904	1.3876	1.25605	0.987576	0.954876	0.948446	1.61688	1.55685	1.89959	0.538845	0.734348	0.710162	1.3031	1.17335	1.21299	0.862016	0.88969	0.901032	2.46676	2.6322	2.63962
inducible_.chr6:92890970_base_inducible_1	2121	1941	979	3614	5670	3509	5864	1613	2193	2717	4713	2522	3587	2199	2639	5947	4635	7957	5672	3999	2098	3565	1691	3558	2014	4965	ATTGTGCGTAAGGCGCGGTGCAGTGAGCTGGGAGAGCCAGCCGCGGGAAAGTTTCTGCGTCATACGCGCGTGGTAGAAACGCACGTCGCTTGGGAAAGTGAAGGACCACCCTAGTTGGGTCCAGAATTGTACATGACT	FALSE	1.62073	1.60196	1.65801	1.18208	1.06181	1.23474	1.79763	1.52372	2.06061	0.625433	0.653915	0.606227	1.67003	1.58654	1.61295	1.13751	1.1549	1.09306	3.04754	3.14866	3.06219
inducibleMutant_.i1.408301939_mm_chr6:92890970$scrCREB5_scrCREB5at57^scrRFX5_scrRFX5at8^RFX5_RFX5at14^scrCREB5_scrCREB5at50_1	2046	1991	920	2641	4575	2364	5903	1012	1462	1670	3997	2099	2732	1793	2774	5892	5005	5653	4027	2797	1438	2216	1094	2346	1458	3593	ATTGTGCGTAAGGCGCGGTGCAGTGAGCTGGGAGAGCCAGCCGCGGGAAAGTTTCTGCGTCATACGCGCGTGGTAGAAACGCACGTCGCTTGGGAAAGTGAAGGACCACCCTAGTTGGGTCCAGAATTGTAGACGACT	FALSE	1.68575	1.63518	1.54875	0.909576	0.86816	0.93078	1.30497	1.22133	1.37905	0.599332	0.666328	0.565928	1.35049	1.40862	1.43154	0.956212	0.88044	0.867289	2.65536	2.74167	2.62674
inducibleMutant_.i1.236163691_mm_chr6:92890970$scrCREB5_scrCREB5at50^scrRFX5_scrRFX5at8^RFX5_RFX5at14^scrCREB5_scrCREB5at57_1	13297	13123	6239	18153	34591	20481	36387	8172	12514	13066	24126	13148	17583	13352	19476	38973	29022	40547	32880	22476	10626	18243	8708	16775	9669	23903	ATTGTGCGTAAGGCGCGGTGCAGTGAGCTGGGAGAGCCAGCCGCGGGAAAGTTTCTGCGTCATACGCGCGTGGTAGAAACGCACGTCGCTTGGGAAAGTGAAGGACCACCCTAGTTGGGTCCAGGACTGTACATGACT	FALSE	1.3664	1.37545	1.33853	0.986326	0.997889	0.977928	1.45515	1.49807	1.93826	0.63189	0.712487	0.622609	1.29676	1.25445	1.27889	0.948854	0.97333	0.927041	2.55763	3.00607	2.83451
inducibleMutant_.ip.-320294043_mm_chr6:92890970$RFX5_RFX5at14^scrRFX5_scrRFX5at8^scrCREB5_scrCREB5at50^scrCREB5_scrCREB5at57_1	2858	3239	1847	3904	7193	4521	4558	1674	2494	2584	5123	2832	3726	1959	3053	6247	4428	6607	5149	3520	1606	2837	1628	2747	1599	3896	ATTGTGCGTAAGGCGCGGTGCAGTGAGCTGGGAGAGCCAGCCGCGGGAAAGTTTCTGCGTCATACGCGCGTGGTAGAAACGCACGTTGCCATGGCAACGGAAGGACCACCCTAGTTGGGTCCAGAATTGTACATGACT	FALSE	1.97755	2.01925	1.93326	1.37708	1.35548	1.31816	2.49828	2.48685	3.4156	1.08423	1.40387	1.47143	1.44733	1.41394	1.42073	0.977433	1.03166	1.18126	2.8405	3.2085	3.02561
inducibleMutant_.If.1840754913_mm_chr6:92890970$RFX5_RFX5at14^scrRFX5_scrRFX5at8^scrCREB5_scrCREB5at50^scrCREB5_scrCREB5at57_1	1171	1163	613	1327	2647	1474	2608	857	1388	1263	2080	1207	1438	1347	1502	3698	2487	3476	2401	1542	1143	2151	925	1304	946	2052	ATTGTGCGTAAGGCGCGGTGCAGTGAGCTGGGAGAGCCAGCCGCGGGAAAGTTTCTGCGTCATACGCGCGTGGTAGAAACGCAGCAGCGAACCCTTTCAGAAGGACCACCCTAGTTGGGTCCAGAATTGTACATGACT	FALSE	1.16771	1.25162	1.08511	1.0253	1.09712	0.937015	1.48412	1.59941	1.94624	0.776397	0.880972	0.853492	0.9992	1.21658	1.08827	1.01171	1.13758	0.976115	2.17339	2.1759	1.92762
inducibleMutant_.i2.1840709779_mm_chr6:92890970$scrRFX5_scrRFX5at8^RFX5_RFX5at14^scrCREB5_scrCREB5at50^scrCREB5_scrCREB5at57_1	1903	1773	863	1951	4057	2211	5084	1593	2474	2758	3783	2249	2851	2080	2788	5297	3696	5155	3087	2256	2217	3743	1698	2754	1571	4288	ATTGTGCGTAAGGCGCGGTGCAGTGAGCTGGGAGAGCCAGCCGCGGGAAAGTTTCTGCGTCATACGCGCGTGGTAGAAACTCACGTCGCTTGGGAAAGTGAAGGACCACCCTAGTTGGGTCCAGAATTGTACATGACT	FALSE	1.37534	1.51028	1.39321	1.23422	1.26639	1.32508	1.11933	1.25752	1.49758	0.647243	0.688959	0.616385	1.3666	1.30837	1.47271	1.2708	1.28194	1.16038	2.08733	1.81171	1.82634
inducibleMutant_.ip.1141904530_mm_chr6:92890970$scrRFX5_scrRFX5at8^RFX5_RFX5at14^scrCREB5_scrCREB5at50^scrCREB5_scrCREB5at57_1	6368	6111	2903	5513	10469	5767	14142	4224	6408	6812	10519	5534	7538	7401	7691	17784	12730	12902	9279	6199	5733	9483	4511	6992	4186	10249	ATTGTGCGTAAGGCGCGGTGCAGTGAGCTGGGAGAGCCAGCCGCGGGAAAGTTTCTGCGTCATACGCGCGTGGTAGACCGAGAGTGATGCTCCGAAAGTGAAGGACCACCCTAGTTGGGTCCAGAATTGTACATGACT	FALSE	1.07479	1.04443	1.03526	0.919755	0.921859	0.919803	1.13706	1.16657	1.40425	0.778622	0.853673	0.745388	0.975109	0.979774	0.989274	0.923564	0.912779	0.866381	1.46822	1.53047	1.41038
inducibleMutant_.i1.254534784_mm_chr6:92890970$scrRFX5_scrRFX5at8^RFX5_RFX5at14^scrCREB5_scrCREB5at50^scrCREB5_scrCREB5at57_1	1818	2058	1057	3304	6388	3818	4737	1103	1547	2036	4457	2593	3217	2007	2659	6007	4701	8613	6538	4836	1648	2736	1432	3723	2130	5285	ATTGTGCGTAAGGCGCGGTGCAGTGAGCTGGGAGAGCCAGCCGCGGGAAAGTTTCTGCGTCATACGCGCGTGGTAGAGACGCACGTCACTTGGGAAAGTGAAGGACCACCCTAGTTGGGTCCAGAATTGTACATGACT	FALSE	1.67932	1.80463	1.62924	0.885659	0.820683	1.01377	2.03443	2.12508	2.77548	0.663628	0.858286	0.810248	1.91464	1.83844	1.88115	0.979006	0.971134	1.0142	3.61436	3.9766	4.05737
inducibleMutant_.If.2139647618_mm_chr6:92890970$scrRFX5_scrRFX5at8^RFX5_RFX5at14^scrCREB5_scrCREB5at50^scrCREB5_scrCREB5at57_1	12735	11973	5905	16408	31278	18524	22570	7234	11020	11740	23780	12958	17298	11567	15995	32321	24680	37604	29190	21176	9726	16224	8254	16802	9839	24673	ATTGTGCGTAAGGCGCGGTGCAGTGAGCTGGGAGAGCCAGCCGCGGGAAAGTTTCTGCGTCATACGCGCGTGGTAGATTGCGTGCAGCGAACCGAAAGTGAAGGACCACCCTAGTTGGGTCCAGAATTGTACATGACT	FALSE	1.55464	1.56477	1.52005	1.00785	1.01436	1.01428	2.12046	2.18385	2.82624	0.975667	1.048	0.950025	1.49928	1.47349	1.5238	1.00251	0.999189	1.01431	2.73803	3.08055	3.08268
RFXrandMutant_.If.1014233239_mm_chr9:184940900$scrRFX5_scrRFX5at48^RFX5_RFX5at11_1	437	450	172	136	191	68	311	270	565	581	632	305	472	434	154	467	204	306	141	96	328	614	283	462	186	649	ATTTCTCATTTCTTGGAAATAGAGTGCTGAACTCACTCCAGAGAAGCCCAGACACTGAAAATAGCTTTTCTTTGTGAAGCAGTAACCATGGTGCCTGAATCTGAATCTGAATTGGTTAGTTTATATTTCGAAAGTTTT	FALSE	1.1012	0.981617	1.10544	1.00257	1.38609	1.33782	1.27551	0.967805	0.75293	2.42972	2.85853	2.00824	1.09874	0.742404	1.06827	0.901073	1.00783	0.92688	0.593822	0.396592	0.372466
putativeConstitWgoodRFXsite_.chr9:184940900_base_RFX25_great_tiles_from_constitK27_CBP_peaks_1	624	506	220	160	257	105	316	654	736	877	791	434	594	461	128	480	298	221	133	83	495	846	468	600	317	750	ATTTCTCATTTCTTGGAAATAGAGTGCTGAACTCACTCCAGAGAAGCCCAGACACTGAAAATAGCTTTTCTTTGTGAAGCAGTAACCATGGTGCCTGAATCTGAATCTGAATTGGTTTCAAATATAAAGCTTTGTTTT	FALSE	1.29752	1.31499	1.30969	2.28621	1.69985	1.90112	1.47686	1.28162	1.14422	3.41454	3.16339	2.52803	1.34336	1.19117	1.16221	1.28021	1.30731	1.44302	0.403753	0.35218	0.303167
activeMutant_.i2.-1557468130_mm_chr6:108659575$RFX5_RFX5at-22^scrRFX5_scrRFX5at11^scrRFX5_scrRFX5at14^CREB5_CREB5at25_1	806	860	340	474	871	261	1505	781	1208	1437	1683	829	1219	1054	665	2032	807	1142	493	391	1186	1896	890	1152	715	1707	ATTTCTTGTGGGCGAATTGGCCTCTCCGGGGCTGTCAGGATGCTGTTCCTCTCCATGACATCAGCGTGTGCGAATGAGGAGATGCAGCATACTGAGTGGTGTCATCCTAAGAAACCAACCCCCACCACTCCCACACTT	FALSE	1.20748	1.09862	1.17556	1.19412	1.22028	1.36247	0.918644	0.912003	0.597187	0.926047	1.12889	0.820331	1.12812	1.17512	1.15696	1.34159	1.28147	1.20026	0.912537	0.57098	0.624657
activeMutant_.i1.1601938622_mm_chr6:108659575$RFX5_RFX5at-22^scrRFX5_scrRFX5at11^scrRFX5_scrRFX5at14^CREB5_CREB5at25_1	815	636	207	390	532	222	1489	872	1405	1405	1748	906	1305	1116	688	1887	686	488	338	248	1143	1928	858	1209	747	1967	ATTTCTTGTGGGCGAATTGGCCTCTCCGGGGCTGTCAGGATGCTGTTCGACTCCATGACAAGAGCGTGTGCGAATGAGGAGATGCAGCATACTGAGTGGTGTCATCCTAAGAAACCAACCCCCACCACTCCCACACTT	FALSE	1.18445	1.13396	1.18858	1.25919	1.34043	1.25812	0.763969	0.56303	0.51341	0.946449	0.843825	0.504803	1.11816	1.15951	1.25912	1.22112	1.2307	1.09282	0.368282	0.369715	0.374191
activeMutant_.ip.-386243913_mm_chr6:108659575$scrRFX5_scrRFX5at11^RFX5_RFX5at-22^scrRFX5_scrRFX5at14^CREB5_CREB5at25_1	815	957	364	262	754	287	1338	742	1175	1237	1551	871	1288	1093	518	1432	885	736	547	375	941	1613	859	1272	608	1625	ATTTCTTGTGGGCGAATTGGCCTCTCCGGGGCTGTCAGGATGCTGTTCGTCTCCATGACAACAGCGTGTGCGAATGAGGACCGAGAGTGATGCTCCTGGTGTCATCCTAAGAAACCAACCCCCACCACTCCCACACTT	FALSE	1.07307	1.11309	1.19778	1.09401	1.14459	1.13099	0.571151	0.888035	0.738639	1.05326	1.41301	0.987852	1.20118	0.963608	1.06208	1.02647	1.05129	1.11712	0.56713	0.610916	0.577719
activeMutant_.If.-1999741331_mm_chr6:108659575$scrRFX5_scrRFX5at11^RFX5_RFX5at-22^scrRFX5_scrRFX5at14^CREB5_CREB5at25_1	3865	3898	1516	2418	4077	1862	4809	2909	4660	5226	6362	3568	4959	3939	1995	5454	2582	2622	1434	1121	3661	5559	2944	4257	2357	5698	ATTTCTTGTGGGCGAATTGGCCTCTCCGGGGCTGTCAGGATGCTGTTCGTCTCCATGACAACAGCGTGTGCGAATGAGGACTACGTCGTATGACTCTGGTGTCATCCTAAGAAACCAACCCCCACCACTCCCACACTT	FALSE	1.22137	1.26523	1.27965	1.19014	1.2596	1.32585	1.46658	1.33598	1.33331	1.38973	1.60132	1.1447	1.11548	1.03655	1.03338	1.10813	1.00536	1.06238	0.560624	0.444403	0.479209
activeMutant_.ip.-154571629_mm_chr6:108659575$scrRFX5_scrRFX5at14^RFX5_RFX5at-22^scrRFX5_scrRFX5at11^CREB5_CREB5at25_1	671	850	281	320	678	249	1161	738	1136	1229	1114	607	877	905	404	832	599	719	288	171	813	1264	767	881	472	1211	ATTTCTTGTGGGCGAATTGGCCTCTCCGGGGCTGTCAGGATGCTGTTCGTCTCCATGACAACAGCGTGTGCGAATGAGGAGATCCGAGAGTGATGCTCCTGTCATCCTAAGAAACCAACCCCCACCACTCCCACACTT	FALSE	0.930839	0.936855	0.984993	1.31415	1.33648	1.35711	0.80394	0.920263	0.738539	0.999366	1.44636	0.878862	1.00478	0.903463	0.955919	1.07107	0.994967	1.20468	0.669122	0.388471	0.318165
activeMutant_.If.-300755562_mm_chr6:108659575$scrRFX5_scrRFX5at14^RFX5_RFX5at-22^scrRFX5_scrRFX5at11^CREB5_CREB5at25_1	2011	1897	789	1064	1958	952	2309	1985	3072	3289	4074	2317	3296	2157	970	2218	1306	1208	755	602	1960	3392	1768	2449	1506	3543	ATTTCTTGTGGGCGAATTGGCCTCTCCGGGGCTGTCAGGATGCTGTTCGTCTCCATGACAACAGCGTGTGCGAATGAGGAGATCGTCGTATGACTCACCTGTCATCCTAAGAAACCAACCCCCACCACTCCCACACTT	FALSE	1.42827	1.5004	1.55317	1.48303	1.51636	1.52379	1.34407	1.3363	1.41977	1.50599	1.62306	1.24079	1.17187	1.20946	1.1734	1.08338	1.12025	1.16509	0.471674	0.427278	0.46995
activeMutant_.i1.135314119_mm_chr6:108659575$scrRFX5_scrRFX5at14^RFX5_RFX5at-22^scrRFX5_scrRFX5at11^CREB5_CREB5at25_1	1367	1694	539	567	965	424	1321	1059	1473	1735	1553	1017	1249	915	475	1623	671	662	449	272	910	1379	780	974	614	1430	ATTTCTTGTGGGCGAATTGGCCTCTCCGGGGCTGTCAGGATGCTGTTCGTCTCCATGACAACAGCGTGTGCGAATGAGGAGATGCAGCATACTAAGTGGTGTCATCCTAAGAAACCAACCCCCACCACTCCCACACTT	FALSE	1.28348	1.5525	1.38747	1.86515	1.71401	1.89491	1.25195	1.15117	1.10527	1.78937	2.53338	1.4816	1.0987	1.16242	1.11645	1.18576	1.07363	1.21171	0.609343	0.599017	0.500557
activeMutant_.ip.-714302803_mm_chr6:108659575$CREB5_CREB5at25^RFX5_RFX5at-22^scrRFX5_scrRFX5at11^scrRFX5_scrRFX5at14_1	2448	3180	1259	1884	3275	1618	1585	1658	2645	3152	3153	1558	2497	1430	936	3324	1525	2014	1085	787	1367	1950	1050	1378	781	1960	ATTTCTTGTGGGCGAATTGGCCTCTCCGGGGCTGTCAGGATGCTGTTCGTCTCCATGACAACAGCGTGTGCGAATGAGGAGATGCAGCATACTGAATGACGTCACCCTAAGAAACCAACCCCCACCACTCCCACACTT	FALSE	1.66735	1.52182	1.77486	1.86847	1.96935	2.20273	3.46703	3.25609	3.51524	2.67065	3.96358	2.88432	0.994616	0.946089	0.979142	1.13975	0.971424	1.04371	1.18617	0.926207	0.92671
activeMutant_.i2.-348531778_mm_chr6:108659575$CREB5_CREB5at25^RFX5_RFX5at-22^scrRFX5_scrRFX5at11^scrRFX5_scrRFX5at14_1	1034	1276	375	407	685	269	1383	1195	1981	2060	2078	1061	1458	1136	405	1178	493	519	307	201	1144	1837	934	1171	761	1867	ATTTCTTGTGGGCGAATTGGCCTCTCCGGGGCTGTCAGGATGCTGTTCGTCTCCATGACAACAGCGTGTGCGAATGAGGAGATGCAGCATACTGAGGGCTGTCATCCTAAGAAACCAACCCCCACCACTCCCACACTT	FALSE	1.38326	1.30458	1.30455	1.69523	1.85669	1.81217	0.858377	0.780518	0.669786	1.2928	1.82271	0.98459	1.06395	1.16044	1.17406	1.20067	1.15197	1.16868	0.384781	0.329894	0.297936
activeMutant_.i1.1979780034_mm_chr6:108659575$CREB5_CREB5at25^RFX5_RFX5at-22^scrRFX5_scrRFX5at11^scrRFX5_scrRFX5at14_1	2069	2150	959	739	945	515	1705	1533	2376	2674	2251	1253	1746	1306	941	2596	1103	1133	665	419	1393	2347	1230	1507	930	2304	ATTTCTTGTGGGCGAATTGGCCTCTCCGGGGCTGTCAGGATGCTGTTCGTCTCCATGACAACAGCGTGTGCGAATGAGGAGATGCAGCATACTGAGTGGTGGCCTCCTAAGAAACCAACCCCCACCACTCCCACACTT	FALSE	1.30338	1.34011	1.35889	1.89164	1.93703	2.04611	1.26423	0.873418	1.04013	2.09831	2.49117	2.0424	1.191	1.23355	1.26027	1.2717	1.28021	1.33872	0.730654	0.621574	0.540227
active_.chr6:108659575_base_active_1	9350	11230	4181	3831	7391	3271	8478	6787	10521	11675	10705	5866	7892	6096	3772	11161	4675	4932	2735	1761	5517	9593	4747	6343	3633	9320	ATTTCTTGTGGGCGAATTGGCCTCTCCGGGGCTGTCAGGATGCTGTTCGTCTCCATGACAACAGCGTGTGCGAATGAGGAGATGCAGCATACTGAGTGGTGTCATCCTAAGAAACCAACCCCCACCACTCCCACACTT	FALSE	1.32794	1.34409	1.3159	1.7942	1.83757	1.91391	1.31803	1.3738	1.3286	1.90701	2.61683	1.79074	1.07397	1.03237	1.09219	1.07903	1.12104	1.10688	0.681401	0.54768	0.486429
activeMutant_.If.1780809645_mm_chr6:108659575$CREB5_CREB5at25^RFX5_RFX5at-22^scrRFX5_scrRFX5at11^scrRFX5_scrRFX5at14_1	2145	1963	774	717	1160	506	1769	1552	2331	2407	2051	1008	1520	1094	562	1961	855	887	383	271	1116	1967	1050	1225	751	1824	ATTTCTTGTGGGCGAATTGGCCTCTCCGGGGCTGTCAGGATGCTGTTCGTCTCCATGACAACAGCGTGTGCGAATGAGGAGATGCAGCATACTGTCACCACAGTAGCTAAGAAACCAACCCCCACCACTCCCACACTT	FALSE	1.41771	1.28699	1.41224	2.28619	2.2686	2.19872	1.18222	1.03334	0.984983	2.09669	2.19221	1.58876	1.15574	1.18916	1.19106	1.21625	1.28085	1.36426	0.682859	0.427362	0.417116
activeMutant_.i2.-2119306402_mm_chr6:108659575$scrRFX5_scrRFX5at14^RFX5_RFX5at-22^scrRFX5_scrRFX5at11^CREB5_CREB5at25_1	3403	4108	1242	2438	3866	1609	4314	3000	4766	4931	5381	3006	4234	3017	1438	3802	1629	2152	1289	825	2600	3858	1895	2813	1631	4270	ATTTCTTGTGGGCGAATTGGCCTCTCCGGGGCTGTCAGGATGCTGTTCGTCTCCATGACAACAGCGTGTGCGAATGAGGAGATGCATCATACTGCGTGGTGTCATCCTAAGAAACCAACCCCCACCACTCCCACACTT	FALSE	1.34873	1.3917	1.42645	1.60245	1.68194	1.63332	1.64839	1.4122	1.28435	1.36401	1.88122	1.04541	0.962358	0.936474	1.01106	1.02748	0.910956	0.892813	0.600747	0.521545	0.460452
activeMutant_.i2.-1055023590_mm_chr6:108659575$scrRFX5_scrRFX5at11^RFX5_RFX5at-22^scrRFX5_scrRFX5at14^CREB5_CREB5at25_1	3035	3060	1185	1200	2368	920	2910	1939	3161	3398	3364	1742	2508	2123	1237	3152	1423	1605	747	497	1739	3010	1427	1908	1201	2918	ATTTCTTGTGGGCGAATTGGCCTCTCCGGGGCTGTCAGGATGCTGTTCGTCTCCATGACAACAGCGTGTGCGAATGAGGAGATTCAGCATACTGAGTGGTGTCATCCTAAGAAACCAACCCCCACCACTCCCACACTT	FALSE	1.19824	1.14612	1.20077	1.47186	1.58528	1.5995	1.2028	1.28234	1.08868	1.80343	2.07739	1.47867	0.927621	0.979964	0.981886	0.976619	1.01001	0.955434	0.636722	0.429521	0.394196
activeMutant_.ip.1651049103_mm_chr6:108659575$RFX5_RFX5at-22^scrRFX5_scrRFX5at11^scrRFX5_scrRFX5at14^CREB5_CREB5at25_1	1800	2018	689	704	1167	540	1657	1350	1896	2236	1939	1088	1544	1226	729	1757	883	753	471	337	1091	1974	1015	1076	610	1671	ATTTCTTGTGGGCGAATTGGCCTCTCCGGGGCTGTCAGGATGCTGTTCGTTGCCATGGCAACGGCGTGTGCGAATGAGGAGATGCAGCATACTGAGTGGTGTCATCCTAAGAAACCAACCCCCACCACTCCCACACTT	FALSE	1.19598	1.23957	1.28008	1.77452	1.64657	1.8226	1.23924	1.10985	1.12222	1.87838	2.40596	1.50988	0.905866	0.861899	0.97367	1.06099	1.14701	1.1768	0.517284	0.46897	0.462855
activeMutant_.If.2124779497_mm_chr6:108659575$RFX5_RFX5at-22^scrRFX5_scrRFX5at11^scrRFX5_scrRFX5at14^CREB5_CREB5at25_1	1088	906	278	430	845	245	2001	1078	1546	1864	2364	1334	1801	1804	842	2516	917	903	539	306	1304	2664	1301	1867	1149	2738	ATTTCTTGTGGGCGAATTGGCCTCTCCGGGGCTGTCAGGATGCTGTTGCAGAGGTACTGTTGTGCGTGTGCGAATGAGGAGATGCAGCATACTGAGTGGTGTCATCCTAAGAAACCAACCCCCACCACTCCCACACTT	FALSE	0.990944	1.03288	1.01475	0.962988	0.912442	1.03257	0.626797	0.665464	0.421624	0.940191	0.894481	0.50448	1.06819	1.10332	1.08423	0.86182	1.05198	1.0251	0.421576	0.364726	0.285621
RFXrandMutant_.If.516246540_mm_chr4:231913385$scrRFX5_scrRFX5at-26^RFX5_RFX5at-45^CREB5_CREB5at-3_1	788	866	252	331	753	240	874	736	1242	1519	1696	980	1305	949	432	1468	507	714	387	252	853	1653	758	1091	579	1420	ATTTTTACCCACCCTGAGCCTTCCGGTCTCCATGGCGACGCCTGGTTTGTCGTCTAAGGAGGCGGCAATGACGTCACCTTTCCCTTTCCTGCCGCCCAGGCCTCTAGGCGCTGCTGCTTGGGGCCCAGGGGCTGCAAG	FALSE	1.35144	1.44242	1.39774	1.24983	1.39344	1.59957	1.10464	1.35768	0.945597	1.55901	1.95748	1.04697	1.18659	1.05689	1.06893	1.07166	1.24084	1.13535	0.633661	0.497805	0.447136
inducibleMutant_.ip.-486938307_mm_chr5:149436765$scrCREB5_scrCREB5at5^scrCREB5_scrCREB5at10^RFX5_RFX5at33^scrRFX5_scrRFX5at50_1	1150	1093	364	1056	1703	664	1584	752	1308	1413	1909	1023	1332	1357	635	1639	751	1191	508	354	953	1637	752	1075	706	1668	CAAAGGCAAGCATCAGAGCTTCTTTTCAGACACAATGAGGTCAAGTCTGACGTCGTCATTGATGTATGTATATAAACCCTCAAGGTTTGAATTACTGTTAACGGTAACCATGACAACGAGAAATCTCATTCTCGTTGC	FALSE	1.06381	1.053	0.997715	0.893052	1.02627	1.04057	1.94453	1.69424	1.44351	1.25539	1.36319	0.834435	0.817657	0.901243	0.878096	0.837315	0.859368	0.787707	0.739191	0.456981	0.439267
inducibleMutant_.If.1648950416_mm_chr5:149436765$scrCREB5_scrCREB5at5^scrCREB5_scrCREB5at10^RFX5_RFX5at33^scrRFX5_scrRFX5at50_1	1346	1265	527	1880	2773	1474	2171	1386	2256	2206	3759	2004	2762	1678	1224	3204	1315	2071	1022	707	1574	2870	1569	2023	1202	2941	CAAAGGCAAGCATCAGAGCTTCTTTTCAGACACAATGAGGTCAAGTCTGACGTCGTCATTGATGTATGTATATAACAGTACAACTTTTGAATTACTGTTAACGGTAACCATGACAACGAGAAATCTCATTCTCGTTGC	FALSE	1.69402	1.66816	1.67307	1.3311	1.43146	1.31378	2.52583	2.01282	2.338	1.07206	1.15112	0.881449	1.24436	1.24088	1.25207	1.11838	1.21843	1.3291	1.03947	0.743487	0.709468
inducibleMutant_.i2.-1387261913_mm_chr5:149436765$scrCREB5_scrCREB5at5^scrCREB5_scrCREB5at10^RFX5_RFX5at33^scrRFX5_scrRFX5at50_1	1034	932	211	1825	2250	948	1455	728	1151	1376	3456	1917	2870	1189	543	1898	484	1803	847	704	798	1470	696	2091	1243	3014	CAAAGGCAAGCATCAGAGCTTCTTTTCAGACACAATGAGGTCAAGTCTGACGTCGTCATTGATGTATGTATATACGTCATGTTGAGTTGAATTACTGTTAACGGTAACCATGACAACGAGAAATCTCATTCTCGTTGC	FALSE	2.19801	2.25202	2.45348	0.986707	1.03069	1.1565	3.65852	2.43688	2.24363	1.22883	1.26544	0.526582	1.81516	1.81095	1.81087	0.800197	0.880736	0.832059	1.27714	0.869592	0.997002
inducibleMutant_.ip.-437273855_mm_chr5:149436765$scrCREB5_scrCREB5at10^scrCREB5_scrCREB5at5^RFX5_RFX5at33^scrRFX5_scrRFX5at50_1	149	171	49	155	245	91	325	163	247	277	382	231	308	281	118	276	118	138	73	43	211	395	186	183	146	404	CAAAGGCAAGCATCAGAGCTTCTTTTCAGACACAATGAGGTCAAGTCTGACGTCGTCATTGATGTATGTATATATGTCAAACCCTCAAGGTTTACTGTTAACGGTAACCATGACAACGAGAAATCTCATTCTCGTTGC	FALSE	1.028	1.14825	1.11411	0.934803	0.935886	0.985109	1.39109	1.18795	0.964194	0.792752	1.03945	0.547469	0.672182	0.900043	1.02707	0.895265	1.00139	0.940878	0.413616	0.317125	0.257672
inducibleMutant_.i2.17718105_mm_chr5:149436765$scrCREB5_scrCREB5at10^scrCREB5_scrCREB5at5^RFX5_RFX5at33^scrRFX5_scrRFX5at50_1	2377	2455	1032	3539	5257	2971	3059	1613	2598	2642	5673	3013	4383	2006	1510	4195	1754	2855	1472	1137	1547	2976	1496	2558	1439	3754	CAAAGGCAAGCATCAGAGCTTCTTTTCAGACACAATGAGGTCAAGTCTGACGTCGTCATTGATGTATGTATATATGTCACGTTGAATTGAGTTACTGTTAACGGTAACCATGACAACGAGAAATCTCATTCTCGTTGC	FALSE	2.13855	2.09798	2.22087	1.29581	1.37893	1.31617	3.37448	2.70815	3.34449	1.34364	1.58548	1.22503	1.31617	1.24264	1.33687	0.919465	1.05685	1.06005	1.19867	0.895759	0.95441
inducibleMutant_.i1.1783704082_mm_chr5:149436765$scrCREB5_scrCREB5at5^scrCREB5_scrCREB5at10^RFX5_RFX5at33^scrRFX5_scrRFX5at50_1	2838	2488	930	3044	4260	2115	3211	2259	3302	3707	5674	3127	4517	2697	1263	4027	1532	2632	1420	918	2251	3582	1865	2793	1664	4335	CAAAGGCAAGCATCAGAGCTTCTTTTCAGACACAATGAGGTCAAGTCTGACGTCGTCATTGATGTATGTATATATGTCAGGCTGAATTGAATTACTGTTAACGGTAACCATGACAACGAGAAATCTCATTCTCGTTGC	FALSE	1.59091	1.61949	1.70236	1.34981	1.30355	1.37357	2.76509	2.09066	2.26817	1.52829	1.53073	1.05169	1.06889	1.06878	1.14824	0.995108	0.946139	0.982934	0.82192	0.64272	0.573148
inducibleMutant_.If.857395182_mm_chr5:149436765$RFX5_RFX5at33^scrCREB5_scrCREB5at5^scrCREB5_scrCREB5at10^scrRFX5_scrRFX5at50_1	1072	803	301	630	867	406	2211	1311	1866	2105	3034	1522	2295	1996	757	2440	864	1463	698	382	1669	2542	1547	2290	1232	3199	CAAAGGCAAGCATCAGAGCTTCTTTTCAGACACAATGAGGTCAAGTCTGACGTCGTCATTGATGTATGTATATATGTCATGTTGAATTGAATTACTGTTAACCCATTGGTACTGTTGCAGAAATCTCATTCTCGTTGC	FALSE	1.14946	1.06509	1.1687	1.05848	0.995368	1.05391	0.831108	0.617938	0.63233	0.838379	0.717491	0.494338	1.18418	1.06922	1.14493	0.996946	0.907247	1.10168	0.617317	0.426883	0.322261
inducibleMutant_.ip.-2069844613_mm_chr5:149436765$RFX5_RFX5at33^scrCREB5_scrCREB5at5^scrCREB5_scrCREB5at10^scrRFX5_scrRFX5at50_1	1327	1392	439	1916	2571	1273	2408	1827	2847	3174	5140	2780	4037	2244	800	2276	774	1300	717	421	2091	3640	1987	2212	1390	3631	CAAAGGCAAGCATCAGAGCTTCTTTTCAGACACAATGAGGTCAAGTCTGACGTCGTCATTGATGTATGTATATATGTCATGTTGAATTGAATTACTGTTAACCGTTGCCATGGCAACGAGAAATCTCATTCTCGTTGC	FALSE	1.73212	1.73043	1.8286	1.31206	1.35082	1.4135	2.32084	1.68252	1.82045	0.952903	1.14202	0.661995	1.01743	1.07302	1.15592	1.11098	1.15555	1.25864	0.487916	0.390041	0.315911
inducibleMutant_.i2.-1465087553_mm_chr5:149436765$RFX5_RFX5at33^scrCREB5_scrCREB5at5^scrCREB5_scrCREB5at10^scrRFX5_scrRFX5at50_1	1336	1060	342	816	1345	521	2893	1281	2093	2061	3347	1828	2582	2236	1051	2960	1110	1502	874	582	1569	2813	1345	2134	1333	3292	CAAAGGCAAGCATCAGAGCTTCTTTTCAGACACAATGAGGTCAAGTCTGACGTCGTCATTGATGTATGTATATATGTCATGTTGAATTGAATTACTGTTAACGCTAACCATGACATCGAGAAATCTCATTCTCGTTGC	FALSE	1.13194	1.14192	1.17373	0.923243	0.996621	0.921121	0.822711	0.732636	0.620148	0.798532	0.723848	0.429264	0.985065	1.0327	1.05175	0.836617	0.896207	0.855022	0.565748	0.477149	0.438285
inducibleMutant_.i1.1394378015_mm_chr5:149436765$RFX5_RFX5at33^scrCREB5_scrCREB5at5^scrCREB5_scrCREB5at10^scrRFX5_scrRFX5at50_1	1528	1528	611	1210	2069	804	3418	1693	2549	2745	4341	2339	3336	2363	1472	4276	2091	2253	1360	998	2485	3634	1998	3071	1688	4043	CAAAGGCAAGCATCAGAGCTTCTTTTCAGACACAATGAGGTCAAGTCTGACGTCGTCATTGATGTATGTATATATGTCATGTTGAATTGAATTACTGTTAACGGAAACCATGACAAGGAGAAATCTCATTCTCGTTGC	FALSE	1.3892	1.38261	1.43497	1.1546	1.14852	1.16089	1.03257	0.953901	0.81001	0.773011	0.883164	0.649106	1.3414	1.23744	1.22227	1.25383	1.09555	1.20187	0.803012	0.70257	0.711168
inducibleMutant_.ip.-1610538489_mm_chr5:149436765$scrRFX5_scrRFX5at50^scrCREB5_scrCREB5at5^scrCREB5_scrCREB5at10^RFX5_RFX5at33_1	2165	2086	1194	2390	4388	2600	3181	1693	2677	2794	4098	2303	3025	2318	1900	4749	3517	2810	2027	1724	2260	3977	1755	2561	1623	4053	CAAAGGCAAGCATCAGAGCTTCTTTTCAGACACAATGAGGTCAAGTCTGACGTCGTCATTGATGTATGTATATATGTCATGTTGAATTGAATTACTGTTAACGGTAACCATGACAACGACCGAGAGTGATGCTCCTGC	FALSE	1.33689	1.38775	1.32646	1.17702	1.22961	1.20455	2.19149	2.17379	2.8146	1.17687	1.29551	1.36297	1.14035	1.21289	1.24908	1.16244	1.22223	1.07619	1.02098	1.06747	1.25236
inducibleMutant_.If.-945288590_mm_chr5:149436765$scrRFX5_scrRFX5at50^scrCREB5_scrCREB5at5^scrCREB5_scrCREB5at10^RFX5_RFX5at33_1	756	694	260	786	1271	658	874	451	680	609	1074	680	751	750	562	1467	702	988	412	282	630	969	452	693	331	905	CAAAGGCAAGCATCAGAGCTTCTTTTCAGACACAATGAGGTCAAGTCTGACGTCGTCATTGATGTATGTATATATGTCATGTTGAATTGAATTACTGTTAACGGTAACCATGACAACGACTTTAGAGTAAGAGCATGC	FALSE	1.08288	1.26643	1.0178	0.969067	0.96534	0.811459	2.62311	2.29165	2.59251	1.4957	1.56869	1.08021	0.953705	0.764511	0.862011	1.00151	0.920392	0.856651	1.10948	0.670579	0.63313
inducibleMutant_.i1.-1051923491_mm_chr5:149436765$scrRFX5_scrRFX5at50^scrCREB5_scrCREB5at5^scrCREB5_scrCREB5at10^RFX5_RFX5at33_1	1856	2033	759	2734	3739	2195	2456	1493	2317	2492	4660	2703	3766	1729	1039	3434	1593	2020	1226	967	1875	2924	1364	2404	1385	3371	CAAAGGCAAGCATCAGAGCTTCTTTTCAGACACAATGAGGTCAAGTCTGACGTCGTCATTGATGTATGTATATATGTCATGTTGAATTGAATTACTGTTAACGGTAACCATGACAACGAGAAATCTCATACTCGTTGC	FALSE	2.03812	2.18365	2.21395	1.39156	1.4268	1.44034	3.24695	2.39906	3.0776	1.30672	1.63531	1.12217	1.4351	1.38762	1.3928	1.29295	1.20474	1.12136	0.983968	0.865585	0.941753
inducible_.chr5:149436765_base_inducible_1	1115	1065	402	1792	2165	1224	1535	959	1373	1450	3069	1688	2232	1427	547	1883	774	1370	637	476	893	1837	903	1255	734	1915	CAAAGGCAAGCATCAGAGCTTCTTTTCAGACACAATGAGGTCAAGTCTGACGTCGTCATTGATGTATGTATATATGTCATGTTGAATTGAATTACTGTTAACGGTAACCATGACAACGAGAAATCTCATTCTCGTTGC	FALSE	1.62634	1.65227	1.58984	1.08301	1.02442	1.01544	3.40514	2.22261	2.74587	1.25603	1.37066	0.950964	0.907741	0.891023	0.958673	0.746111	0.917055	0.899478	0.808577	0.544916	0.561679
inducibleMutant_.i2.-2144034691_mm_chr5:149436765$scrRFX5_scrRFX5at50^scrCREB5_scrCREB5at5^scrCREB5_scrCREB5at10^RFX5_RFX5at33_1	1381	1413	535	1850	2613	1288	1975	1423	2209	2289	4139	2417	3251	1671	690	2609	862	1344	776	560	1502	2477	1324	1722	1087	2874	CAAAGGCAAGCATCAGAGCTTCTTTTCAGACACAATGAGGTCAAGTCTGACGTCGTCATTGATGTATGTATATATGTCATGTTGAATTGAATTACTGTTAACGGTAACCATGACAACGAGAATTCTCATTCTCGTTGC	FALSE	1.87308	2.02038	1.97753	1.37236	1.40751	1.36893	2.73219	2.08491	2.24572	1.2091	1.4134	0.983633	1.06365	1.12686	1.22867	1.07169	1.05599	1.12626	0.677404	0.566891	0.564309
inducibleMutant_.i1.1403248731_mm_chr5:149436765$scrCREB5_scrCREB5at10^scrCREB5_scrCREB5at5^RFX5_RFX5at33^scrRFX5_scrRFX5at50_1	1152	1186	342	1672	2110	1036	1820	1189	1717	1958	3191	1900	2578	1245	583	2192	687	1318	584	409	1240	2005	892	1567	881	2245	CAAAGGCAAGCATCAGAGCTTCTTTTCAGACACAATGAGGTCAAGTCTGACGTCGTCATTGATGTATGTATATATGTCATGTTGGACTGAATTACTGTTAACGGTAACCATGACAACGAGAAATCTCATTCTCGTTGC	FALSE	1.93819	2.13165	2.10473	1.53904	1.46836	1.57164	2.6796	1.82695	1.96017	1.0945	1.28737	0.682341	1.2991	1.22581	1.28817	1.18748	1.14724	1.01841	0.891602	0.572608	0.553171
RFXgreatMutant_.If.-442897696_mm_chr1:95724612$scrCREB5_scrCREB5at-50^scrRFX5_scrRFX5at-33^scrCREB5_scrCREB5at-26^RFX5_RFX5at-15_1	228	211	66	72	96	34	135	220	399	363	411	245	263	261	94	223	51	70	47	28	184	379	209	238	116	356	CAACACCCTTAGAGGAATTACGTTAAGTATTAGTTACTGCCAATTTTGCATTATAGTTGCCATGGCAGCCGTGCTAGGCTGCTGCTCAAACATTCCTCAGAAGGGGAAGGAATAGTATATAATAAGCTCTTCAAGTGT	FALSE	1.1908	1.31117	1.02423	1.35838	1.62766	1.38988	1.55562	1.1206	0.867264	2.92035	3.08772	1.77524	0.941193	0.7699	0.974395	0.84053	1.03445	1.13824	0.225882	0.219822	0.180644
RFXgreatMutant_.i1.275467894_mm_chr1:95724612$scrCREB5_scrCREB5at-50^scrRFX5_scrRFX5at-33^scrCREB5_scrCREB5at-26^RFX5_RFX5at-15_1	638	538	172	213	310	84	399	371	537	515	433	334	396	355	195	677	237	199	140	78	451	491	315	411	235	604	CAACACCCTTAGAGGAATTTGCAAGTCATAAAGTTACTGCCAATTTTGCATTATAGTTGCCATGGCAGCCGTGCTAGGCTGCTGCTCAAACATTCCTCAGAAGGGGAAGGAATAGTATATAATAAGCTCTTCAAGTGT	FALSE	0.922354	1.31417	1.13383	1.68416	1.61057	1.44974	1.55709	1.22434	0.724958	2.76492	2.66379	1.56532	1.19497	1.14672	1.21544	1.51469	0.985289	1.26127	0.472117	0.481409	0.369974
putativeConstitWgreatRFXsite_.chr1:95724612_base_RFX25_great_tiles_from_constitK27_CBP_peaks_1	211	271	81	98	91	45	156	257	428	407	554	242	327	169	79	196	61	95	41	22	228	490	226	384	218	452	CAACACCCTTAGAGGAATTTGCAATTCATAAAGTTACTGCCAATTTTGCATTATAGTTGCCATGGCAGCCGTGCTAGGCTGCTGCTCAAACATTCCTCAGAAGGGGAAGGAATAGTATATAATAAGCTCTTCAAGTGT	FALSE	2.47891	2.00014	1.96672	2.45067	2.69643	2.40668	1.83234	0.919245	0.993331	2.3388	3.4319	1.88541	2.34524	2.23453	1.91063	1.60851	2.06547	1.90085	0.473436	0.29615	0.2192
RFXgreatMutant_.i1.-273052234_mm_chr1:95724612$scrCREB5_scrCREB5at-26^scrCREB5_scrCREB5at-50^scrRFX5_scrRFX5at-33^RFX5_RFX5at-15_1	563	565	204	124	167	79	262	264	582	593	423	280	334	216	142	357	163	189	62	25	348	606	289	284	184	464	CAACACCCTTAGAGGAATTTGCAATTCATAAAGTTACTGCCAATTTTGGACTATAGTTGCCATGGCAGCCGTGCTAGGCTGCTGCTCAAACATTCCTCAGAAGGGGAAGGAATAGTATATAATAAGCTCTTCAAGTGT	FALSE	1.4809	1.81066	1.57172	1.96965	2.86881	2.74354	1.38047	1.00445	1.03832	3.71571	4.26027	2.82732	1.35708	1.47564	1.53458	1.92088	1.99862	1.90183	0.736941	0.35039	0.194891
RFXgreatMutant_.If.891760769_mm_chr1:95724612$scrRFX5_scrRFX5at-33^scrCREB5_scrCREB5at-50^scrCREB5_scrCREB5at-26^RFX5_RFX5at-15_1	681	563	182	446	456	275	1089	905	1550	1638	3185	1528	2120	1390	426	1191	442	809	364	192	1124	1891	918	1571	973	2212	CAACACCCTTAGAGGAATTTGCAATTCATAAAGTTAGACGGTTAAAACGTAAATAGTTGCCATGGCAGCCGTGCTAGGCTGCTGCTCAAACATTCCTCAGAAGGGGAAGGAATAGTATATAATAAGCTCTTCAAGTGT	FALSE	1.73274	1.53547	1.55025	1.04923	1.18727	1.17763	1.19457	0.65986	0.869583	1.08132	1.02134	0.606862	1.16655	1.21259	1.13683	0.964111	0.969141	0.93876	0.490183	0.319669	0.23259
RFXrandMutant_.i1.-1215595750_mm_chr11:81850992$CREB5_CREB5at34^scrRFX5_scrRFX5at-58^RFX5_RFX5at-48^scrCREB5_scrCREB5at10_1	93	80	27	105	120	49	223	185	266	263	395	206	224	335	133	226	102	166	100	75	219	393	177	252	159	286	CAATTCTTTTCCCCAGAGCCTTGTTGCCAGGGCTGCAGCTGCACAACCAATTCTTATGAAAATGGGGTCTTTGAAATGCTGGTCTATGGAAAAGGATATAAAGGATTTCAGTCTCTCTTCTCAAAACTCACAGTGAGG	FALSE	0.891642	0.858924	0.67965	0.88995	0.845414	0.784552	1.37338	0.847991	0.756654	0.721128	0.708721	0.439648	0.776422	0.822184	0.609883	0.779426	0.835715	0.751026	0.417338	0.364392	0.376983
inactive_.chr15:37389240_base_inactive_1	7768	8268	4154	4064	7905	3758	8547	4228	6325	6601	8196	4825	6557	6127	8839	19824	16430	12086	7769	5485	5703	9472	4783	6231	3852	9276	CACATGGCCAGATAAAAGCCAAGAGAGCATTGGTTGTCGTAGCAACCACAGACTGGCTCTGAAATTATTTCAATAGGTCATCTGTCACTGATGTGTGTGCTCGTGTGTGTGCATATCTGTGTGTGCATGTATGTATAC	TRUE	1.01156	1.09997	1.08778	1.11205	1.09912	1.07665	1.3869	1.45748	1.51408	1.57156	1.91107	1.76482	1.04967	1.08907	1.08153	1.10977	1.1013	1.10963	1.66134	1.54786	1.50742
activeMutant_.ip.921604409_mm_chr9:54582315$CREB5_CREB5at-7^scrRFX5_scrRFX5at-15^scrCREB5_scrCREB5at-1^scrRFX5_scrRFX5at5^scrRFX5_scrRFX5at10_1	2653	2949	1793	1436	3059	1609	3585	2204	3506	3863	2995	1676	2297	1772	2912	6091	5283	2670	2457	1858	3652	5495	3045	2244	1324	2948	CACCATTCCCCAACTCTGCCCAGCACACCAACTCACCACCGTACAGCCAGCCGCACAGCACGAATGACGTCACCGGAGCACGACCGTGGCGCTCGTGGATGAGCTAACGAAGGGGCGGGGCCTCTCCTGGGATGCGGG	FALSE	1.27812	1.32112	1.31759	2.00441	2.10659	2.17857	1.16834	1.34464	1.54551	1.27962	1.62508	1.81609	1.30708	1.29432	1.18847	2.45721	2.20909	2.44259	1.26903	1.69261	1.76558
activeMutant_.i2.-1580786383_mm_chr9:54582315$CREB5_CREB5at-7^scrRFX5_scrRFX5at-15^scrCREB5_scrCREB5at-1^scrRFX5_scrRFX5at5^scrRFX5_scrRFX5at10_1	389	170	247	300	633	297	1261	558	830	902	1119	592	816	788	675	461	1011	582	577	451	646	1165	610	778	555	1088	CACCATTCCCCAACTCTGCCCAGCACACCAACTCACCACCGTACAGCCAGCCGCACAGCACGCCGGCCGTCAGTGGAGCACGACCGTGGCGCTCGTGGATGAGCTAACGAAGGGGCGGGGCCTCTCCTGGGATGCGGG	FALSE	1.07385	1.04937	1.05256	1.14116	1.12146	1.14391	0.693924	0.791049	0.81105	0.533419	0.266332	0.71126	1.01905	1.22007	0.986344	0.977422	1.0532	1.10035	0.622045	0.893848	0.963731
activeMutant_.ip.1812954508_mm_chr9:54582315$scrCREB5_scrCREB5at-1^scrRFX5_scrRFX5at-15^CREB5_CREB5at-7^scrRFX5_scrRFX5at5^scrRFX5_scrRFX5at10_1	1097	1023	654	627	1475	628	2266	726	1251	1177	1623	854	1227	1142	1300	2679	2112	1680	1282	748	1132	1908	824	1212	690	1738	CACCATTCCCCAACTCTGCCCAGCACACCAACTCACCACCGTACAGCCAGCCGCACAGCACGCCTGACAACCCTCAAGGTCGACCGTGGCGCTCGTGGATGAGCTAACGAAGGGGCGGGGCCTCTCCTGGGATGCGGG	FALSE	1.07471	1.04454	1.0921	1.02449	1.16634	1.02996	0.807074	1.02576	0.954346	0.837107	0.891878	1.04801	1.09542	1.04665	1.0872	1.18183	1.19021	1.02562	1.23899	1.37036	1.10291
activeMutant_.If.538333007_mm_chr9:54582315$scrCREB5_scrCREB5at-1^scrRFX5_scrRFX5at-15^CREB5_CREB5at-7^scrRFX5_scrRFX5at5^scrRFX5_scrRFX5at10_1	226	276	165	191	387	317	993	365	497	591	766	444	531	432	428	650	933	522	369	247	501	746	379	554	314	808	CACCATTCCCCAACTCTGCCCAGCACACCAACTCACCACCGTACAGCCAGCCGCACAGCACGCCTGACCAGTCACCTCGTCGACCGTGGCGCTCGTGGATGAGCTAACGAAGGGGCGGGGCCTCTCCTGGGATGCGGG	FALSE	1.34086	1.43559	1.24937	1.36159	1.22491	1.36714	0.561035	0.614153	1.0993	0.393544	0.549098	0.603366	1.32364	1.25911	1.33614	1.38271	1.23017	1.24705	1.01768	1.04269	0.962761
activeMutant_.i2.1974445072_mm_chr9:54582315$scrCREB5_scrCREB5at-1^scrRFX5_scrRFX5at-15^CREB5_CREB5at-7^scrRFX5_scrRFX5at5^scrRFX5_scrRFX5at10_1	124	116	125	163	199	106	358	175	341	382	434	212	257	203	221	319	452	263	229	190	311	478	258	299	159	379	CACCATTCCCCAACTCTGCCCAGCACACCAACTCACCACCGTACAGCCAGCCGCACAGCACGCCTGACCTCAGTGGAGCGCGACCGTGGCGCTCGTGGATGAGCTAACGAAGGGGCGGGGCCTCTCCTGGGATGCGGG	FALSE	1.61671	1.45872	1.28682	1.38925	1.78851	1.88052	1.32804	0.875961	1.0196	0.598926	0.640125	1.26787	1.52026	1.35681	1.33373	1.82659	1.67742	1.80655	1.09115	1.37706	1.57602
activeMutant_.i1.1800210427_mm_chr9:54582315$CREB5_CREB5at-7^scrRFX5_scrRFX5at-15^scrCREB5_scrCREB5at-1^scrRFX5_scrRFX5at5^scrRFX5_scrRFX5at10_1	1340	703	872	803	1783	943	2884	636	1056	1125	1458	770	1091	1549	1746	1768	3208	2246	1472	1376	1050	1451	806	1043	659	1546	CACCATTCCCCAACTCTGCCCAGCACACCAACTCACCACCGTACAGCCAGCCGCACAGCACGCCTGACGGCCGTGGAGCACGACCGTGGCGCTCGTGGATGAGCTAACGAAGGGGCGGGGCCTCTCCTGGGATGCGGG	FALSE	0.711778	0.694339	0.715905	0.661674	0.725847	0.725791	0.812131	0.974251	1.12596	0.803422	0.48156	1.09791	0.694985	0.736972	0.71299	0.80819	0.667308	0.739623	1.22119	1.16003	1.4958
activeMutant_.ip.-2002686840_mm_chr9:54582315$scrRFX5_scrRFX5at5^scrRFX5_scrRFX5at-15^CREB5_CREB5at-7^scrCREB5_scrCREB5at-1^scrRFX5_scrRFX5at10_1	996	1117	421	627	1735	743	2252	916	1253	1454	2269	1026	1536	1298	1226	2140	2577	1512	1390	830	1167	1927	1245	1370	803	2266	CACCATTCCCCAACTCTGCCCAGCACACCAACTCACCACCGTACAGCCAGCCGCACAGCACGCCTGACGTCAGTCCGAGAGTGATGCTCCGCTCGTGGATGAGCTAACGAAGGGGCGGGGCCTCTCCTGGGATGCGGG	FALSE	1.3219	1.10409	1.20281	1.13726	1.0278	1.11944	0.812091	1.21408	1.13613	0.76476	0.979884	0.678829	1.0894	1.07166	1.24713	1.07194	1.05759	1.36339	0.981074	1.30724	1.07673
activeMutant_.If.-385471466_mm_chr9:54582315$scrRFX5_scrRFX5at5^scrRFX5_scrRFX5at-15^CREB5_CREB5at-7^scrCREB5_scrCREB5at-1^scrRFX5_scrRFX5at10_1	5987	5406	3301	5048	10740	5564	8976	2786	4658	4979	7745	4142	5490	4273	6968	11175	11889	11824	9123	6151	4291	6600	3524	5227	3267	7946	CACCATTCCCCAACTCTGCCCAGCACACCAACTCACCACCGTACAGCCAGCCGCACAGCACGCCTGACGTCAGTCCTCGTGCTGGCACCGGCTCGTGGATGAGCTAACGAAGGGGCGGGGCCTCTCCTGGGATGCGGG	FALSE	1.37065	1.35397	1.30593	1.05072	1.16064	1.16445	1.64037	1.88554	2.13457	1.15335	1.18983	1.33539	1.26259	1.32444	1.32844	1.1973	1.10033	1.17228	2.33054	2.60627	2.42392
activeMutant_.i1.-1061724984_mm_chr9:54582315$scrRFX5_scrRFX5at5^scrRFX5_scrRFX5at-15^CREB5_CREB5at-7^scrCREB5_scrCREB5at-1^scrRFX5_scrRFX5at10_1	1622	1894	1067	824	1700	889	2536	1560	2408	2503	1957	1063	1400	1188	1798	3633	3394	1967	1586	1319	2440	3815	2023	1393	832	1974	CACCATTCCCCAACTCTGCCCAGCACACCAACTCACCACCGTACAGCCAGCCGCACAGCACGCCTGACGTCAGTGGAGCACGACAGTGGCGCTCGTGGATGAGCTAACGAAGGGGCGGGGCCTCTCCTGGGATGCGGG	FALSE	1.2457	1.24982	1.19783	2.11615	2.1581	2.1055	0.947728	1.05637	1.20714	1.10595	1.47544	1.52778	1.21026	1.21318	1.18702	2.44878	2.28764	2.42051	1.39448	1.62967	1.86954
active_.chr9:54582315_base_active_1	464	596	274	225	487	332	897	629	1097	1129	871	495	736	458	495	1002	1153	610	537	299	1184	1889	970	614	373	790	CACCATTCCCCAACTCTGCCCAGCACACCAACTCACCACCGTACAGCCAGCCGCACAGCACGCCTGACGTCAGTGGAGCACGACCGTGGCGCTCGTGGATGAGCTAACGAAGGGGCGGGGCCTCTCCTGGGATGCGGG	FALSE	1.43811	1.50963	1.63341	2.21322	2.5502	2.46342	0.731637	0.855561	1.27454	0.894458	1.31263	1.10919	1.38371	1.41078	1.23222	3.08221	2.93817	3.01046	1.12173	1.43127	1.09929
activeMutant_.i2.617347351_mm_chr9:54582315$scrRFX5_scrRFX5at10^scrRFX5_scrRFX5at-15^CREB5_CREB5at-7^scrCREB5_scrCREB5at-1^scrRFX5_scrRFX5at5_1	948	922	486	635	1324	479	2410	664	1058	1131	1205	673	847	1013	1005	1885	1982	1567	1417	773	990	1603	770	942	550	1252	CACCATTCCCCAACTCTGCCCAGCACACCAACTCACCACCGTACAGCCAGCCGCACAGCACGCCTGACGTCAGTGGAGCACGTCCGTGGCCCTCGTGGATGAGCTAACGAAGGGGCGGGGCCTCTCCTGGGATGCGGG	FALSE	0.89953	0.927978	0.849877	1.05632	1.11201	1.11574	0.768533	0.865736	0.684423	0.680183	0.755795	0.732261	0.959807	0.940525	0.882918	1.1652	1.12729	1.08046	1.30282	1.70755	1.28492
activeMutant_.i1.1511912074_mm_chr9:54582315$scrRFX5_scrRFX5at10^scrRFX5_scrRFX5at-15^CREB5_CREB5at-7^scrCREB5_scrCREB5at-1^scrRFX5_scrRFX5at5_1	1354	1421	937	724	1564	723	2251	1608	2587	2774	1892	1127	1421	1276	1400	2573	2997	1971	1202	850	2642	4017	2165	1468	822	1972	CACCATTCCCCAACTCTGCCCAGCACACCAACTCACCACCGTACAGCCAGCCGCACAGCACGCCTGACGTCAGTGGAGCGCGACCGTGGAGCTCGTGGATGAGCTAACGAAGGGGCGGGGCCTCTCCTGGGATGCGGG	FALSE	1.12127	1.23369	1.13195	2.03083	2.15863	2.17253	0.938142	1.0949	1.10604	1.04011	1.24712	1.51151	1.18746	1.11593	1.10403	2.46864	2.24265	2.41176	1.30095	1.14992	1.12169
activeMutant_.If.194857876_mm_chr9:54582315$scrRFX5_scrRFX5at10^scrRFX5_scrRFX5at-15^CREB5_CREB5at-7^scrCREB5_scrCREB5at-1^scrRFX5_scrRFX5at5_1	898	841	605	1021	1688	808	1869	816	1094	1193	1614	969	1454	984	1248	2208	2593	1871	1395	909	1084	1816	1000	1318	774	1895	CACCATTCCCCAACTCTGCCCAGCACACCAACTCACCACCGTACAGCCAGCCGCACAGCACGCCTGACGTCAGTGGAGCTGCTGGCACCGCGAGCTGGATGAGCTAACGAAGGGGCGGGGCCTCTCCTGGGATGCGGG	FALSE	1.24036	1.3755	1.50194	1.33639	1.18374	1.21159	1.59339	1.42324	1.4887	0.830809	0.888948	1.17542	1.38249	1.36258	1.37575	1.31344	1.31471	1.44455	1.60141	1.73059	1.55551
activeMutant_.i2.939309711_mm_chr9:54582315$scrRFX5_scrRFX5at5^scrRFX5_scrRFX5at-15^CREB5_CREB5at-7^scrCREB5_scrCREB5at-1^scrRFX5_scrRFX5at10_1	2531	2637	1392	1501	3719	2011	4646	1804	2551	2758	2912	1810	2453	2266	2734	5582	5534	3305	2876	1991	2497	4016	1937	2199	1288	3190	CACCATTCCCCAACTCTGCCCAGCACACCAACTCACCACCGTACAGCCAGCCGCACAGCACGCCTGACGTCAGTGGATCACGACCCTGGCGCTCGTGGATGAGCTAACGAAGGGGCGGGGCCTCTCCTGGGATGCGGG	FALSE	0.971784	1.11571	1.10032	1.28297	1.19862	1.21631	0.942339	1.26143	1.49052	0.941992	1.1213	1.08794	1.00163	0.98463	1.00567	1.31382	1.26254	1.21506	1.22839	1.54933	1.47951
activeMutant_.If.2017249783_mm_chr9:54582315$CREB5_CREB5at-7^scrRFX5_scrRFX5at-15^scrCREB5_scrCREB5at-1^scrRFX5_scrRFX5at5^scrRFX5_scrRFX5at10_1	108	126	92	103	210	73	373	226	287	279	487	212	311	320	170	362	326	100	184	137	240	365	172	251	183	372	CACCATTCCCCAACTCTGCCCAGCACACCAACTCACCACCGTACAGCCAGCCGCACAGCACGGGACTGCAGTCAGGAGCACGACCGTGGCGCTCGTGGATGAGCTAACGAAGGGGCGGGGCCTCTCCTGGGATGCGGG	FALSE	1.15085	0.925376	0.987853	1.13814	0.954914	0.871294	0.805442	0.887207	0.673939	0.500667	0.667347	0.895623	0.809592	0.990645	0.83046	0.894205	0.812556	0.764021	0.263193	0.701911	0.720902
activeMutant_.i2.1055398927_mm_chr9:54582315$scrRFX5_scrRFX5at-15^CREB5_CREB5at-7^scrCREB5_scrCREB5at-1^scrRFX5_scrRFX5at5^scrRFX5_scrRFX5at10_1	1050	1070	454	675	1496	565	2081	766	1217	1278	1431	907	1117	1144	906	2267	1986	1138	1146	823	915	2051	870	1109	638	1393	CACCATTCCCCAACTCTGCCCAGCACACCAACTCACCACCGTACAGCCAGCCGCACATCACGCCTCACGTCAGTGGAGCACGACCGTGGCGCTCGTGGATGAGCTAACGAAGGGGCGGGGCCTCTCCTGGGATGCGGG	FALSE	0.945914	1.10742	0.992451	1.07905	1.13265	1.11639	0.946101	1.13285	0.934938	0.872472	1.01578	0.792192	1.00057	0.966077	0.869863	0.95361	1.27717	1.08099	0.837801	1.22285	1.21138
activeMutant_.ip.303923449_mm_chr9:54582315$scrRFX5_scrRFX5at-15^CREB5_CREB5at-7^scrCREB5_scrCREB5at-1^scrRFX5_scrRFX5at5^scrRFX5_scrRFX5at10_1	914	723	295	294	660	492	1217	711	1091	1286	1478	781	1149	840	640	1209	1052	932	806	519	947	1488	739	837	600	1445	CACCATTCCCCAACTCTGCCCAGCACACCAACTCACCACCGTACAGCCAGCCGCCCGAGAGTGATGCTCCCAGTGGAGCACGACCGTGGCGCTCGTGGATGAGCTAACGAAGGGGCGGGGCCTCTCCTGGGATGCGGG	FALSE	1.33056	1.29869	1.39035	1.36405	1.38286	1.52993	0.704632	0.85461	1.39213	1.29864	1.17365	0.880193	1.02846	1.23734	1.22889	1.34415	1.26193	1.25052	0.934461	1.1713	1.04038
activeMutant_.i1.-1366813965_mm_chr9:54582315$scrRFX5_scrRFX5at-15^CREB5_CREB5at-7^scrCREB5_scrCREB5at-1^scrRFX5_scrRFX5at5^scrRFX5_scrRFX5at10_1	405	288	248	321	579	321	923	205	301	379	368	187	195	459	352	757	1042	739	409	319	341	591	278	314	170	448	CACCATTCCCCAACTCTGCCCAGCACACCAACTCACCACCGTACAGCCAGCCGCGCAGCACGCCAGACGTCAGTGGAGCACGACCGTGGCGCTCGTGGATGAGCTAACGAAGGGGCGGGGCCTCTCCTGGGATGCGGG	FALSE	0.60628	0.569064	0.431821	0.719747	0.69821	0.825158	1.0144	0.988534	1.19759	0.758731	0.616426	0.975655	0.706089	0.641583	0.697254	0.885763	0.917244	0.860912	1.35599	1.08774	1.17026
activeMutant_.If.1894207704_mm_chr9:54582315$scrRFX5_scrRFX5at-15^CREB5_CREB5at-7^scrCREB5_scrCREB5at-1^scrRFX5_scrRFX5at5^scrRFX5_scrRFX5at10_1	1005	1024	635	742	1432	738	1914	691	1096	1073	1294	813	1016	1140	1316	2310	2453	1735	1470	880	871	1418	765	1134	585	1408	CACCATTCCCCAACTCTGCCCAGCACACCAACTCACCACCGTACAGCCAGCCGCTGTCGTGCGGACTGCACAGTGGAGCACGACCGTGGCGCTCGTGGATGAGCTAACGAAGGGGCGGGGCCTCTCCTGGGATGCGGG	FALSE	0.858356	0.996134	0.90588	0.976814	1.02362	0.940601	1.13075	1.17901	1.32776	0.907943	1.05693	1.2047	1.02672	0.888931	0.882314	0.910938	0.886098	0.953857	1.2818	1.57408	1.29982
activeMutant_.i2.328113267_mm_chr15:97998220$RFX5_RFX5at-26^RFX5_RFX5at10^scrRFX5_scrRFX5at46_1	14523	11588	9567	11356	20899	12264	9531	6481	11123	11961	12117	6962	9403	5533	8897	15270	18965	13728	10815	9548	5979	9570	5359	7270	4260	10264	CACTGCAGCTTCGGAACCCTGTTCTCTTTCTTCCTCACTTCCTCCTTGCCATGGAGTCACACGTCATTTACGTGCCGTGCGTCGCCTTGGAAACGGGGGAGCATCCGCGGCGCCGCCGGGAGACCCGCCCCTGCCTCT	FALSE	1.65605	1.75754	1.72738	1.88764	2.14039	2.16032	3.4753	3.45543	4.43098	2.63483	2.40193	3.64488	1.35618	1.33372	1.3252	1.28838	1.23214	1.37673	2.08964	2.38605	2.90574
activeMutant_.i1.1368524051_mm_chr15:97998220$RFX5_RFX5at-26^RFX5_RFX5at10^scrRFX5_scrRFX5at46_1	13836	10564	8571	10968	21591	12934	12100	7596	11857	12973	14660	7883	11016	6988	10192	16668	19253	15752	11880	10280	7882	12981	6797	8716	5106	12855	CACTGCAGCTTCGGAACCCTGTTCTCTTTCTTCCTCACTTCCTCGATGCCATGGAGAGACACGTCATTTACGTGCCGTGCGTCGCCTTGGAAACGGGGGAGCATCCGCGGCGCCGCCGGGAGACCCGCCCCTGCCTCT	FALSE	1.58642	1.57569	1.60233	1.75174	1.80657	1.85523	2.64392	2.81191	3.6809	1.97724	1.72478	2.57213	1.28738	1.26574	1.31415	1.3448	1.32332	1.38258	1.89849	2.07529	2.47711
activeMutant_.i2.1804579059_mm_chr15:97998220$RFX5_RFX5at10^RFX5_RFX5at-26^scrRFX5_scrRFX5at46_1	23273	21921	15439	12788	24800	14528	12676	10722	17186	19049	15977	9411	13093	6579	10864	20169	22470	14840	10765	8921	6372	9932	5407	7246	4491	10642	CACTGCAGCTTCGGAACCCTGTTCTCTTTCTTCCTCACTTCCTCGTTGCCATGGAGACACACGTCATTTACGTGCCGTGCCTCGCCTTGGAATCGGGGGAGCATCCGCGGCGCCGCCGGGAGACCCGCCCCTGCCTCT	FALSE	1.83643	1.99806	2.02284	2.62636	2.7813	2.8935	2.94256	3.08308	3.94666	3.17471	3.41639	4.42266	1.13679	1.1825	1.15555	1.15476	1.07544	1.16822	1.89976	1.99742	2.28328
activeMutant_.i1.2078992787_mm_chr15:97998220$RFX5_RFX5at10^RFX5_RFX5at-26^scrRFX5_scrRFX5at46_1	11022	9684	6794	6782	11369	7018	5642	8544	14276	15647	9704	6040	8031	3734	5526	10292	9808	7168	5169	4444	4698	7699	4280	4580	2637	6246	CACTGCAGCTTCGGAACCCTGTTCTCTTTCTTCCTCACTTCCTCGTTGCCATGGAGACACACGTCATTTACGTGCCGTGCGACGCCTTGGAAAGGGGGGAGCATCCGCGGCGCCGCCGGGAGACCCGCCCCTGCCTCT	FALSE	1.96524	2.25941	2.18614	3.68744	4.07066	4.18762	3.50615	3.17544	4.28338	3.37802	3.39087	4.37259	1.266	1.22336	1.19496	1.50008	1.46883	1.62928	1.61677	1.68984	2.00403
activeMutant_.ip.-558693541_mm_chr15:97998220$scrRFX5_scrRFX5at46^RFX5_RFX5at-26^RFX5_RFX5at10_1	47264	52019	33393	33401	58607	41674	20606	23017	36598	39928	42867	24059	34739	10585	17568	43395	36258	33924	23386	21500	12619	18756	10589	16156	9480	24224	CACTGCAGCTTCGGAACCCTGTTCTCTTTCTTCCTCACTTCCTCGTTGCCATGGAGACACACGTCATTTACGTGCCGTGCGTCGCCTTGGAAACGGGGGAGCATCCGCGGCGCCGCCGAGAGTGATGCTCCTGCCTCT	FALSE	3.06246	3.17482	3.33586	3.50426	3.68128	3.76962	4.72793	4.48199	6.9643	3.96617	4.98722	5.88448	1.57538	1.55144	1.63486	1.42138	1.26229	1.42197	2.69924	2.69699	3.42021
active_.chr15:97998220_base_active_1	28467	25831	20945	21295	35870	24042	12363	15073	24500	26947	25210	13949	20414	7115	10260	18122	24477	18587	14212	13077	8027	13034	7426	10559	6342	16183	CACTGCAGCTTCGGAACCCTGTTCTCTTTCTTCCTCACTTCCTCGTTGCCATGGAGACACACGTCATTTACGTGCCGTGCGTCGCCTTGGAAACGGGGGAGCATCCGCGGCGCCGCCGGGAGACCCGCCCCTGCCTCT	FALSE	2.67939	2.73842	2.91632	3.414	3.66626	3.78483	5.02411	4.57217	6.69658	3.98155	4.12769	6.15181	1.53176	1.54407	1.62484	1.3451	1.30501	1.48357	2.20018	2.43834	3.09484
activeMutant_.i2.2144720889_mm_chr15:97998220$scrRFX5_scrRFX5at46^RFX5_RFX5at-26^RFX5_RFX5at10_1	15899	18810	11055	10385	17858	12389	5127	5341	9101	9829	9249	5413	7539	3141	5654	12436	10579	8082	6191	5689	3391	5586	3053	4405	2528	6253	CACTGCAGCTTCGGAACCCTGTTCTCTTTCTTCCTCACTTCCTCGTTGCCATGGAGACACACGTCATTTACGTGCCGTGCGTCGCCTTGGAAACGGGGGAGCATCCGCGGCGCCGCCGTGAGACCCCCCCCTGCCTCT	FALSE	2.22672	2.40715	2.43965	2.74027	3.08499	3.12717	5.90811	5.48889	8.32107	5.36217	7.24795	7.82964	1.44751	1.3942	1.42215	1.28717	1.2669	1.38161	2.16708	2.40606	3.04981
activeMutant_.i1.656728740_mm_chr15:97998220$scrRFX5_scrRFX5at46^RFX5_RFX5at-26^RFX5_RFX5at10_1	7758	8658	5432	5289	10442	6276	3047	3176	5305	5470	6190	3384	4983	1626	2862	5743	5933	5139	3347	3133	1479	2650	1415	2178	1364	3192	CACTGCAGCTTCGGAACCCTGTTCTCTTTCTTCCTCACTTCCTCGTTGCCATGGAGACACACGTCATTTACGTGCCGTGCGTCGCCTTGGAAACGGGGGAGCATCCGCGGCGCCGGCGGGAGACCAGCCCCTGCCTCT	FALSE	2.87878	2.90698	3.11496	3.14774	3.47374	3.36184	5.06299	5.4004	7.09278	4.40262	5.61352	6.47342	1.38255	1.45315	1.40239	1.08448	1.16101	1.23698	2.66185	2.51275	3.24448
activeMutant_.If.-937017732_mm_chr15:97998220$scrRFX5_scrRFX5at46^RFX5_RFX5at-26^RFX5_RFX5at10_1	52944	45731	38287	38461	65348	46106	21883	25840	42931	45828	40268	21966	31838	12359	18666	29138	36933	33890	23898	20252	13359	22747	11976	16383	10077	24801	CACTGCAGCTTCGGAACCCTGTTCTCTTTCTTCCTCACTTCCTCGTTGCCATGGAGACACACGTCATTTACGTGCCGTGCGTCGCCTTGGAAACGGGGGAGCATCCGCGGCGCCGGGCCCTCTGGGCGGGGTGCCTCT	FALSE	2.46385	2.48256	2.61845	3.36936	3.69845	3.7056	5.12648	4.70587	7.25532	4.18354	4.12851	6.35318	1.36821	1.41242	1.43355	1.28874	1.31115	1.37738	2.30947	2.36044	2.75924
activeMutant_.ip.-58598878_mm_chr15:97998220$RFX5_RFX5at10^RFX5_RFX5at-26^scrRFX5_scrRFX5at46_1	10550	8107	8380	8026	13534	8780	5239	6299	10096	11029	10457	6080	8528	3490	3764	4955	8177	5654	4370	3831	3370	5352	2822	3795	2303	5804	CACTGCAGCTTCGGAACCCTGTTCTCTTTCTTCCTCACTTCCTCGTTGCCATGGAGACACACGTCATTTACGTGCCGTGCGTTGCCATGGCAACGGGGGAGCATCCGCGGCGCCGCCGGGAGACCCGCCCCTGCCTCT	FALSE	2.26579	2.43338	2.48373	2.90861	3.08004	3.15807	4.46844	4.07092	5.77102	3.48208	3.05704	5.80821	1.12235	1.1431	1.18803	1.15128	1.09245	1.14937	1.36444	1.52852	1.84838
activeMutant_.If.318997476_mm_chr15:97998220$RFX5_RFX5at10^RFX5_RFX5at-26^scrRFX5_scrRFX5at46_1	21752	15839	15284	10588	21304	12355	11080	15362	24849	27036	18826	10441	14150	7801	10670	15529	21224	13218	10207	8047	8506	14238	7199	8874	5295	12571	CACTGCAGCTTCGGAACCCTGTTCTCTTTCTTCCTCACTTCCTCGTTGCCATGGAGACACACGTCATTTACGTGCCGTGGCAGCGGAACCTTTGCGGGGAGCATCCGCGGCGCCGCCGGGAGACCCGCCCCTGCCTCT	FALSE	1.82493	1.86949	1.84369	3.17348	3.39149	3.4634	2.78727	3.02995	3.83981	3.39464	2.82409	5.00892	1.17412	1.1758	1.15119	1.30002	1.3002	1.31174	1.42705	1.59721	1.73696
activeMutant_.ip.-1305440236_mm_chr15:97998220$RFX5_RFX5at-26^RFX5_RFX5at10^scrRFX5_scrRFX5at46_1	18888	16673	14237	14560	24476	16229	9598	13813	20656	23391	20140	11746	16889	6065	7187	11745	15189	11355	8485	7913	6646	10177	5842	7872	4835	12154	CACTGCAGCTTCGGAACCCTGTTCTCTTTCTTCCTCACTTCCTCGTTGCCATGGCAACGCACGTCATTTACGTGCCGTGCGTCGCCTTGGAAACGGGGGAGCATCCGCGGCGCCGCCGGGAGACCCGCCCCTGCCTCT	FALSE	2.51112	2.70515	2.83045	3.67025	3.62617	3.85415	4.42472	4.0186	5.8226	3.40282	3.43181	5.38622	1.33967	1.38096	1.43157	1.30649	1.19536	1.36917	1.57682	1.70779	2.19693
inducibleMutant_.ip.-1246010574_mm_chr19:5822355$scrRFX5_scrRFX5at-8_1	609	461	142	762	1090	379	1011	481	785	865	2036	955	1225	917	462	1463	456	1222	647	411	777	1330	610	1478	705	1847	CACTGCTTCCTTTTCTGGAGTTAGGTACAACTATAAATATCGGTGACGCAGCTAGAGATGACCGAGAGTGATGCTCCCAAGCCTGCGTCAGTGATTGTCACCAGCTGTGGGTGGCTTCCGACAGCGCTAAAATGTGTG	FALSE	1.67898	1.45468	1.35784	0.845307	0.91145	0.942665	2.19841	1.69899	1.29091	1.0416	0.900823	0.510016	1.66359	1.33179	1.43888	1.01025	1.03322	0.945556	1.12235	0.86129	0.754706
inducibleMutant_.i2.-1318605439_mm_chr19:5822355$scrRFX5_scrRFX5at-8_1	708	545	165	1866	2510	981	1241	917	1494	1342	4279	2112	2818	1250	572	2214	577	3280	1744	1233	1225	2072	1111	3733	2127	5144	CACTGCTTCCTTTTCTGGAGTTAGGTACAACTATAAATATCGGTGACGCAGCTAGAGATGACTGTGACTGAGCCTCCCAAGCCTGCGTCAGTGATTGTCACCAGCTGTGGGTGGCTTCCGACAGCGCTAAAATGTGTG	FALSE	2.58863	2.36002	2.29146	1.18222	1.27254	1.07289	4.38577	3.18725	2.7221	0.986497	0.86759	0.48279	3.08241	2.94764	2.93979	1.16843	1.18084	1.26337	2.20998	1.70314	1.66096
inducible_.chr19:5822355_base_inducible_1	459	339	96	970	1416	550	860	475	748	738	2577	1322	1733	929	333	1233	413	1636	960	701	613	1089	574	2309	1290	2960	CACTGCTTCCTTTTCTGGAGTTAGGTACAACTATAAATATCGGTGACGCAGCTAGAGATGACTGTGACTGAGGCTCCCAAGCCTGCGTCAGTGATTGTCACCAGCTGTGGGTGGCTTCCGACAGCGCTAAAATGTGTG	FALSE	2.09767	1.98769	1.89612	0.82398	0.857271	0.793874	3.28987	2.59465	2.20227	0.922887	0.778738	0.40534	2.56537	2.40542	2.27615	0.78672	0.835069	0.878259	1.48317	1.26145	1.2706
inducibleMutant_.If.1209108195_mm_chr19:5822355$scrRFX5_scrRFX5at-8_1	2113	1822	679	5702	7182	4422	3033	1786	2775	2977	7819	4022	5581	2471	2028	5245	2526	10683	6014	4785	2508	4090	2007	6813	3889	10204	CACTGCTTCCTTTTCTGGAGTTAGGTACAACTATAAATATCGGTGACGCAGCTAGAGATGAGACACTGACTCCGAGGCAAGCCTGCGTCAGTGATTGTCACCAGCTGTGGGTGGCTTCCGACAGCGCTAAAATGTGTG	FALSE	2.39286	2.27353	2.29573	1.16479	1.1957	1.20397	5.48353	3.73154	5.02056	1.20465	1.18677	0.812913	2.84582	2.72635	2.95001	1.21013	1.17913	1.15452	3.64121	2.97102	3.26073
inducibleMutant_.i1.920052091_mm_chr19:5822355$scrRFX5_scrRFX5at-8_1	550	403	125	1184	1558	689	978	474	902	983	3402	1715	2428	861	519	1197	439	1869	1030	750	854	1422	725	3037	1577	4142	CACTGCTTCCTTTTCTGGAGTTAGGTACAACTATAAATATCGGTGACGCAGCTAGAGATGAGTGTGACTGAAGCTCCCAAGCCTGCGTCAGTGATTGTCACCAGCTGTGGGTGGCTTCCGACAGCGCTAAAATGTGTG	FALSE	2.98792	2.78223	2.86634	0.887184	1.11541	1.14094	3.53117	2.5104	2.42598	0.97243	0.814059	0.464106	3.64069	3.17282	3.43663	1.18258	1.17654	1.19691	1.82823	1.46032	1.46677
inactive_.chr5:102143850_base_inactive_1	5727	5416	2667	3095	5378	2780	10931	5484	8008	8266	11011	5738	7932	7951	6655	15348	11106	9090	5876	4651	6833	11531	5571	7802	4713	11338	CAGACTTTAGTGTGACCTTTCGCTCGTTGCTCTCTCTCCCCGAAATAACACCCCACTTAGTAGGGGTGCATCTACTAGACTTGTTGGGGACATACGTATGACTGTAGTAGTCCTCTCTGAACCTCCGTCTCCTATGAT	TRUE	1.04723	1.00802	1.01401	1.11151	1.07235	1.03893	0.82586	0.77531	0.875772	0.905945	0.978833	0.885951	1.01281	1.02682	1.01869	1.02463	1.03313	0.995951	0.962868	0.902141	0.984986
RFXgreatMutant_.i1.1225420224_mm_chr5:67393152$RFX5_RFX5at-60^CREB5_CREB5at-42^scrRFX5_scrRFX5at24^scrCREB5_scrCREB5at46_1	4883	5454	2440	2599	5443	2348	8439	4073	6191	6968	8776	4737	6081	6776	5868	12800	9822	7449	4830	3612	5455	9965	4564	6126	3807	9018	CAGCTGATTAGATGGCATGGCAAGAGAAAAGATGTAATCCCAGCAGACACACTCTAATCAATGCCCCCAGCACAGATGGTCTCCGGAGGATCAACAAGAAAGAGGCTGGCAGGCATTCAGTTGATCACGTGCTAGCTT	FALSE	0.979403	0.976477	0.912186	0.968678	0.972792	1.02765	0.898299	1.01639	0.958106	1.00053	1.27677	1.04989	0.933138	0.973254	0.950741	0.959836	1.04765	0.957412	0.925869	0.870138	0.897594
RFXgreatMutant_.i1.1669985658_mm_chr5:67393152$CREB5_CREB5at-42^RFX5_RFX5at-60^scrRFX5_scrRFX5at24^scrCREB5_scrCREB5at46_1	931	910	415	345	567	275	719	323	476	536	591	338	408	414	470	1511	1115	664	464	334	354	581	332	426	222	570	CAGCTGATTAGTTGGCATGGCAACAGAAAAGATGGACTCCCAGCAGACACACTCTAATCAATGCCCCCAGCACAGATGGTCTCCGGAGGATCAACAAGAAAGAGGCTGGCAGGCATTCAGTTGATCACGTGCTAGCTT	FALSE	1.07951	1.14038	1.00171	1.25731	1.22416	1.29382	1.39957	1.24271	1.31707	2.23901	2.50036	2.09588	1.06207	0.928901	0.983558	1.01948	0.999738	1.13989	1.3508	1.36814	1.35847
RFXgreatMutant_.If.-1232576457_mm_chr5:67393152$scrCREB5_scrCREB5at46^RFX5_RFX5at-60^CREB5_CREB5at-42^scrRFX5_scrRFX5at24_1	938	1134	538	433	941	402	964	524	832	729	1111	589	726	846	874	1764	1451	918	560	427	558	1169	572	812	524	969	CAGCTGATTAGTTGGCATGGCAACAGAAAAGATGTAATCCCAGCAGACACACTCTAATCAATGCCCCCAGCACAGATGGTCTCCGGAGGATCAACAAGAAAGAGGCTGGCAGGCAAAGTCAACTAGTCGTGCTAGCTT	FALSE	0.993075	0.972472	0.872265	0.998159	1.04709	0.861128	1.31014	1.53825	1.436	1.68252	2.32395	2.02652	0.990668	1.07295	0.818237	0.786393	0.984361	0.961064	0.913897	0.808038	0.84989
RFXgreatMutant_.i1.1801378944_mm_chr5:67393152$scrCREB5_scrCREB5at46^RFX5_RFX5at-60^CREB5_CREB5at-42^scrRFX5_scrRFX5at24_1	3586	3678	1713	1281	2248	984	2754	1344	1953	2110	2431	1364	1880	2178	2139	4758	4092	2462	1676	1178	1701	2553	1383	1707	989	2750	CAGCTGATTAGTTGGCATGGCAACAGAAAAGATGTAATCCCAGCAGACACACTCTAATCAATGCCCCCAGCACAGATGGTCTCCGGAGGATCAACAAGAAAGAGGCTGGCAGGCATTCAGGTCATCACGTGCTAGCTT	FALSE	0.844044	0.874759	0.877368	0.994443	0.954722	0.968134	1.35672	1.28631	1.23037	2.25155	2.63838	2.2586	0.808943	0.786602	0.901987	0.931155	0.835032	0.902591	0.952039	0.939356	0.910737
putativeConstitWgreatRFXsite_.chr5:67393152_base_RFX25_great_tiles_from_constitK27_CBP_peaks_1	16564	17666	8843	4720	10350	4617	11744	6012	9201	9684	10707	6252	8060	8495	9667	22170	17866	10101	6974	4918	6901	11261	5645	7508	4487	10665	CAGCTGATTAGTTGGCATGGCAACAGAAAAGATGTAATCCCAGCAGACACACTCTAATCAATGCCCCCAGCACAGATGGTCTCCGGAGGATCAACAAGAAAGAGGCTGGCAGGCATTCAGTTGATCACGTGCTAGCTT	FALSE	0.953109	1.02799	0.964392	1.1405	1.1532	1.13921	1.17228	1.3888	1.35379	2.43884	2.97175	2.7342	0.912227	0.914976	0.896857	0.968555	0.94433	0.944555	1.00144	1.00215	0.974834
RFXgreatMutant_.i1.599711759_mm_chr5:67393152$scrRFX5_scrRFX5at24^RFX5_RFX5at-60^CREB5_CREB5at-42^scrCREB5_scrCREB5at46_1	12080	14508	6922	3683	7656	3303	7639	4436	6774	7167	7510	4177	5745	5389	6555	16194	11814	6834	4597	3345	4880	8733	4329	5512	3177	7587	CAGCTGATTAGTTGGCATGGCAACAGAAAAGATGTAATCCCAGCAGACACACTCTAATCAATGCCCCCAGCACAGATGGTCTCCGGAGGATCAGCAAGAAAGAAGCTGGCAGGCATTCAGTTGATCACGTGCTAGCTT	FALSE	1.05383	1.08265	1.08359	1.32654	1.33835	1.32905	1.40628	1.57936	1.48894	2.73442	3.75198	3.29035	1.05571	1.02124	1.00574	1.07966	1.15442	1.14184	1.06805	1.04131	1.04519
RFXgreatMutant_.If.-1281527577_mm_chr5:67393152$scrRFX5_scrRFX5at24^RFX5_RFX5at-60^CREB5_CREB5at-42^scrCREB5_scrCREB5at46_1	5302	5635	2601	2576	4795	2252	7227	3233	4739	5172	6277	3189	4668	5075	4707	10245	8291	5608	3988	2785	3938	7395	3186	4231	2450	6357	CAGCTGATTAGTTGGCATGGCAACAGAAAAGATGTAATCCCAGCAGACACACTCTAATCAATGCCCCCAGCACAGATGGTCTCCGGAGGATCATGTTCTTTCTCCGACCCAGGCATTCAGTTGATCACGTGCTAGCTT	FALSE	0.935307	0.877709	0.934925	1.02662	0.994222	1.01843	1.03967	1.04555	1.07304	1.26857	1.54037	1.30686	0.860497	0.836271	0.894833	0.925157	1.03804	0.892352	0.930672	0.959253	0.924048
RFXgreatMutant_.If.1506192964_mm_chr5:67393152$CREB5_CREB5at-42^RFX5_RFX5at-60^scrRFX5_scrRFX5at24^scrCREB5_scrCREB5at46_1	1407	1516	698	521	1101	401	1218	664	1135	1139	1317	694	916	1086	1040	1969	1499	1237	818	467	754	1441	667	853	581	1305	CAGCTGATTAGTTGGCATGGCAACAGATTTCTACATTAGCCAGCAGACACACTCTAATCAATGCCCCCAGCACAGATGGTCTCCGGAGGATCAACAAGAAAGAGGCTGGCAGGCATTCAGTTGATCACGTGCTAGCTT	FALSE	0.917052	0.89261	0.857329	0.985319	1.11275	1.0481	1.24766	1.42447	1.13371	1.99747	2.45891	2.08092	0.810702	0.926751	0.858433	0.827784	0.945245	0.873017	0.959323	0.91947	0.72409
RFXgreatMutant_.If.-1216555727_mm_chr5:67393152$RFX5_RFX5at-60^CREB5_CREB5at-42^scrRFX5_scrRFX5at24^scrCREB5_scrCREB5at46_1	1448	1659	869	717	1467	660	2394	1303	2033	2169	2791	1525	1997	2197	1776	3561	3152	1958	1124	1000	1835	2894	1483	1915	1275	2844	CAGCTGATTTCAACCGTACCGTTGTGAAAAGATGTAATCCCAGCAGACACACTCTAATCAATGCCCCCAGCACAGATGGTCTCCGGAGGATCAACAAGAAAGAGGCTGGCAGGCATTCAGTTGATCACGTGCTAGCTT	FALSE	0.960656	0.969554	0.923911	0.955769	0.985235	0.986598	0.873576	0.965652	0.949349	1.04587	1.36903	1.31808	0.899665	1.0053	0.924752	0.995822	0.93838	0.959484	0.750598	0.624526	0.766435
inducibleMutant_.i2.-1418450436_mm_chr19:53400300$CREB5_CREB5at-69_1	425	320	97	275	527	202	825	534	815	817	1799	910	1398	1013	336	796	379	610	352	249	778	1074	608	1234	664	1792	CAGTCCGTCATCCCTTTAGACCCAAATTTATCTCGGCTGCACACAGCCCCGCAGCTCCCGAGCTGCCGCCGCTGACTTTAGAGCTTACGCACAAAGTTAGACAAGGCTGACTCACTGGGCAGAGCCAAGGTTTTCCGT	FALSE	1.34295	1.25477	1.40275	0.849514	0.856605	0.805978	0.972264	1.00663	0.843148	0.890778	0.766277	0.426937	1.25733	1.13547	1.26373	0.915684	0.755275	0.853141	0.50716	0.424177	0.4139
inducibleMutant_.If.464846935_mm_chr11:74986835$CREB5_CREB5at-65^CREB5_CREB5at-49^scrRFX5_scrRFX5at13_1	1819	151	939	1593	2936	971	1175	1049	1712	1682	2132	1409	1905	1932	2278	460	4467	2870	1985	1903	1316	2464	1256	1695	1137	2461	CATCAAACTGCAGTGTGGACTCTGACGTCACGGTCGCGTGTCTGTCCGCGCGCGCTTGGGAGGAGGTGGGGGGGCCTGAGAAGCAGCAGCACTCTCAACTGCGGGCGACGGGATATCCCCGCCCGGGCAGCGCGCCGG	FALSE	0.834484	1.01868	1.00224	0.874998	0.943472	0.870021	3.95443	3.93761	2.84569	2.67688	0.25388	2.90184	0.905534	1.01946	0.909976	0.812128	0.90854	0.924079	1.25112	1.2542	1.65858
inducibleMutant_.ip.1393363466_mm_chr11:74986835$CREB5_CREB5at-65^CREB5_CREB5at-49^scrRFX5_scrRFX5at13_1	1713	72	1014	2446	4941	1624	888	986	1492	1551	4199	2554	3381	1137	1744	352	3677	3858	3353	2421	1214	2191	1107	3176	1892	4296	CATCAATGACGTCACCGGACTCTGACGTCACGGTCGCGTGTCTGTCCGCGCGCGCTTGGGAGGAGGTGGGGGGGCCTGAGAAGCAGCAGCACTCTCAACTGCGGGCGACGGGATATCCCCGCCCGGGCAGCGCGCCGG	FALSE	2.7927	3.13756	3.0225	1.39751	1.39714	1.36321	8.03432	8.76832	6.29766	3.33564	0.16018	4.1464	2.88312	2.88255	2.69916	1.27302	1.37275	1.38393	2.85777	3.59987	3.58542
activeMutant_.ip.-172442705_mm_chr12:48577385$RFX5_RFX5at-41^RFX5_RFX5at-5_1	1738	1994	1181	1335	2122	1343	603	1177	2155	2118	2374	1288	1685	374	540	1780	1032	792	617	501	446	833	432	598	423	933	CATCCTCCCTTTTTCTTCGCCACTTCCTCGTTGCCATGGCAACGCACGTCATTTACGTGCCGTGCGTCGCCTTGGAAACAGAGGAGCATCCGCGACACCCCCGGGAGACCCACCCCAGCTGCTGCTGCCACACTCGCG	FALSE	4.80007	4.81035	4.57942	5.07158	6.13491	5.65933	6.45758	5.54553	7.66946	4.98387	6.53278	7.11179	1.65033	1.95923	1.78211	1.4218	1.58666	1.64187	1.78352	2.01385	2.25565
activeMutant_.i2.-377328334_mm_chr12:48577385$RFX5_RFX5at-41^RFX5_RFX5at-5_1	4373	5676	2980	3152	5836	3618	2415	2152	3567	3831	4059	2203	3198	1788	2632	6764	5536	3619	2643	2706	2022	3221	1870	2017	1320	3116	CATCCTCCCTTTTTCTTCGCCACTTCCTGCTTACCATGGAGTCACACGTCATTTACGTGCCGTGCGTCGCCTTGGAAACAGAGGAGCATCCGCGACACCCCCGGGAGACCCACCCCAGCTGCTGCTGCCACACTCGCG	FALSE	1.71668	1.72099	1.818	1.93961	2.12407	2.14119	3.80693	3.80814	5.15891	3.1311	4.64318	4.4807	1.16434	1.27886	1.24496	1.34831	1.28332	1.48662	1.70469	1.80445	2.54839
activeMutant_.i1.-1033064302_mm_chr12:48577385$RFX5_RFX5at-41^RFX5_RFX5at-5_1	3490	4808	2507	2357	4023	2783	1533	1774	2989	3419	3327	1911	2781	1045	2422	6172	4503	2914	2272	1894	2024	3033	1918	1653	981	2500	CATCCTCCCTTTTTCTTCGCCACTTCCTGGATACCATGGAGAGACACGTCATTTACGTGCCGTGCGTCGCCTTGGAAACAGAGGAGCATCCGCGACACCCCCGGGAGACCCACCCCAGCTGCTGCTGCCACACTCGCG	FALSE	2.40755	2.55433	2.705	2.73575	3.04538	3.26959	4.48459	4.13545	6.2514	3.93657	6.19601	5.93825	1.63267	1.62618	1.70903	2.30924	2.0676	2.60891	2.34854	2.65403	3.05189
activeMutant_.i2.-1650079566_mm_chr12:48577385$RFX5_RFX5at-5^RFX5_RFX5at-41_1	6344	8526	4361	3393	7328	3999	2957	2856	4557	5224	4212	2422	3298	1950	3477	6973	5585	4228	2833	2500	1751	2479	1516	1757	1142	2626	CATCCTCCCTTTTTCTTCGCCACTTCCTGGTTACCATGGAGACACACGTCATTTACGTGCCGTGCCTCGCCTTGGAATCAGAGGAGCATCCGCGACACCCCCGGGAGACCCACCCCAGCTGCTGCTGCCACACTCGCG	FALSE	1.6334	1.73489	1.71909	2.36027	2.48815	2.67719	3.34686	3.90525	4.657	3.70976	5.69618	5.35527	0.929992	1.01449	0.962024	1.0706	0.905633	1.10507	1.8261	1.77348	2.15879
activeMutant_.i1.1335770130_mm_chr12:48577385$RFX5_RFX5at-5^RFX5_RFX5at-41_1	2232	2609	1521	1208	2289	1319	854	1654	2800	2905	2361	1271	1779	805	1161	2433	2237	1240	989	794	1146	1459	909	1041	592	1381	CATCCTCCCTTTTTCTTCGCCACTTCCTGGTTACCATGGAGACACACGTCATTTACGTGCCGTGCGACGCCTTGGAAAGAGAGGAGCATCCGCGACACCCCCGGGAGACCCACCCCAGCTGCTGCTGCCACACTCGCG	FALSE	2.21788	2.20537	2.24627	3.31115	3.70335	3.60629	4.12586	4.22379	5.31855	4.51929	6.0354	6.46722	1.33474	1.27392	1.22553	1.69732	1.29113	1.60507	1.29733	1.49974	1.66085
active_.chr12:48577385_base_active_1	15212	19773	11222	12109	20193	12447	5311	7863	13257	14618	16461	8748	13208	3944	6205	14408	14228	10017	7372	7074	4099	6373	3516	5186	3185	8055	CATCCTCCCTTTTTCTTCGCCACTTCCTGGTTACCATGGAGACACACGTCATTTACGTGCCGTGCGTCGCCTTGGAAACAGAGGAGCATCCGCGACACCCCCGGGAGACCCACCCCAGCTGCTGCTGCCACACTCGCG	FALSE	3.15615	3.09816	3.40394	3.21285	3.57883	3.70392	6.65024	5.99155	8.07039	4.95273	7.35506	7.67256	1.35718	1.39891	1.459	1.23913	1.15111	1.26718	2.13907	2.28172	3.02018
activeMutant_.ip.-184088535_mm_chr12:48577385$RFX5_RFX5at-5^RFX5_RFX5at-41_1	3582	4189	2582	2297	4628	2904	1034	1095	1762	1899	2233	1345	1691	653	1368	2500	2464	1930	1347	1062	455	869	445	632	394	893	CATCCTCCCTTTTTCTTCGCCACTTCCTGGTTACCATGGAGACACACGTCATTTACGTGCCGTGCGTTGCCATGGCAACGGAGGAGCATCCGCGACACCCCCGGGAGACCCACCCCAGCTGCTGCTGCCACACTCGCG	FALSE	2.58591	2.87701	2.63216	2.70234	2.87293	2.90618	6.47957	7.05322	9.67124	5.99017	8.0035	9.06739	0.998956	1.0452	0.976931	0.830757	0.948019	0.968665	2.48925	2.51807	2.73852
activeMutant_.If.1148910328_mm_chr12:48577385$RFX5_RFX5at-5^RFX5_RFX5at-41_1	3047	3849	1975	1210	2559	1451	1194	2092	3476	3495	2477	1367	1945	911	1335	3168	2638	1738	1134	845	948	1638	678	1098	555	1349	CATCCTCCCTTTTTCTTCGCCACTTCCTGGTTACCATGGAGACACACGTCATTTACGTGCCGTGGCAGCGGAACCTTTGTGAGGAGCATCCGCGACACCCCCGGGAGACCCACCCCAGCTGCTGCTGCCACACTCGCG	FALSE	2.05611	2.09596	2.17012	3.70068	4.0625	3.83389	2.95588	3.37739	4.18475	4.41268	6.36845	6.00633	1.24402	1.05534	1.05784	1.2407	1.28087	1.05788	1.60678	1.51953	1.56187
activeMutant_.If.-1943122195_mm_chr14:30781530$scrRFX5_scrRFX5at-68^RFX5_RFX5at-37^RFX5_RFX5at-19_1	4832	4482	2299	2461	4776	2703	6461	3092	4928	5178	6299	3355	4852	4518	5235	11818	9709	7520	5598	3551	4362	7354	3606	5171	3032	6700	CATCTGCAGTATAGGCCTCTCCTGACTCAGGCAGTATCCACGCCAGCGGAAGTTACTTGTGTGACTGGGCGGAACCTCTAGTCAGGAGTGGTCTCCCAGCAGCCAATGGGCTCGACCCACCTCTAGCCTGACTTGGGT	FALSE	1.0543	1.03724	1.09158	1.10289	1.16133	1.14532	1.11101	1.16487	1.44063	1.29319	1.37045	1.29207	1.18133	1.16252	1.05939	1.15111	1.15955	1.1345	1.40183	1.51252	1.32346
inducibleMutant_.i2.-1845970349_mm_chr11:74986835$CREB5_CREB5at-65^CREB5_CREB5at-49^scrRFX5_scrRFX5at13_1	2732	113	1333	1875	4492	1237	1709	1980	3127	3151	4618	2870	3549	2319	2570	447	4868	3467	2740	2596	2938	4563	2230	3367	2025	4414	CATCTTGGCCGTCACAGGACTCTGACGTCACGGTCGCGTGTCTGTCCGCGCGCGCTTGGGAGGAGGTGGGGGGGCCTGAGAAGCAGCAGCACTCTCAACTGCGGGCGACGGGATATCCCCGCCCGGGCAGCGCGCCGG	FALSE	1.50588	1.72867	1.55556	1.37595	1.43569	1.35787	3.20011	4.14202	2.49249	2.76422	0.130625	2.83227	1.4986	1.51266	1.35974	1.51052	1.40172	1.36688	1.25915	1.44233	1.88499
inducibleMutant_.i1.-673598307_mm_chr11:74986835$CREB5_CREB5at-65^CREB5_CREB5at-49^scrRFX5_scrRFX5at13_1	1164	64	598	868	1887	409	916	969	1231	1326	1746	1033	1459	1171	1361	170	2853	1493	1360	1153	1178	1927	974	1297	853	2055	CATCTTTGACGGCCCAGGACTCTGACGTCACGGTCGCGTGTCTGTCCGCGCGCGCTTGGGAGGAGGTGGGGGGGCCTGAGAAGCAGCAGCACTCTCAACTGCGGGCGACGGGATATCCCCGCCCGGGCAGCGCGCCGG	FALSE	1.12752	1.23218	1.26643	1.33354	1.11927	1.13161	2.76395	3.24632	1.53757	2.19731	0.13803	2.37057	1.14321	1.26185	1.25366	1.1994	1.17229	1.1823	1.07381	1.41774	1.65797
inducibleMutant_.If.-401687145_mm_chr11:74986835$CREB5_CREB5at-49^CREB5_CREB5at-65^scrRFX5_scrRFX5at13_1	612	34	286	334	850	209	409	284	427	534	723	400	537	447	765	134	1265	777	534	500	521	790	319	509	266	754	CATCTTTGACGTCACAGGACAGACTGCAGTGCGTCGCGTGTCTGTCCGCGCGCGCTTGGGAGGAGGTGGGGGGGCCTGAGAAGCAGCAGCACTCTCAACTGCGGGCGACGGGATATCCCCGCCCGGGCAGCGCGCCGG	FALSE	1.22312	1.24993	1.22109	1.02388	1.01707	1.19384	2.38193	3.27499	1.75966	2.58739	0.164227	2.53915	1.17531	1.03084	1.20501	1.38965	1.25901	1.0144	1.46399	1.4583	1.88351
inducibleMutant_.i1.435535517_mm_chr11:74986835$CREB5_CREB5at-49^CREB5_CREB5at-65^scrRFX5_scrRFX5at13_1	672	25	218	344	1048	80	376	674	930	1014	1195	710	840	700	716	54	1547	561	435	733	955	1346	643	891	548	1330	CATCTTTGACGTCACAGGACTCTGACGGCCCGGTCGCGTGTCTGTCCGCGCGCGCTTGGGAGGAGGTGGGGGGGCCTGAGAAGCAGCAGCACTCTCAACTGCGGGCGACGGGATATCCCCGCCCGGGCAGCGCGCCGG	FALSE	1.29095	1.41675	1.21973	1.55167	1.41455	1.44761	2.66856	4.39226	0.73267	3.09041	0.131354	2.10531	1.31378	1.35612	1.35731	1.6266	1.3698	1.30569	0.674978	0.758587	1.76324
inducibleMutant_.ip.462429739_mm_chr11:74986835$scrRFX5_scrRFX5at13^CREB5_CREB5at-65^CREB5_CREB5at-49_1	2853	177	1401	3952	8083	2189	2054	1880	2752	3197	6765	3854	5719	2518	3534	836	5941	7578	5634	4717	2638	4010	2112	4606	2880	7673	CATCTTTGACGTCACAGGACTCTGACGTCACGGTCGCGTGTCTGTCCGCGCGCGCTTGGGAGGAGGTGGGGGGGCCTGAGAACCGAGAGTGATGCTCCCTGCGGGCGACGGGATATCCCCGCCCGGGCAGCGCGCCGG	FALSE	2.03166	2.1379	2.30859	1.20321	1.16366	1.26881	5.61206	6.20136	3.66988	2.40179	0.17024	2.47676	1.88804	1.98132	2.17688	1.24909	1.13449	1.19224	2.53468	2.73134	3.15439
inducibleMutant_.If.132356527_mm_chr11:74986835$scrRFX5_scrRFX5at13^CREB5_CREB5at-65^CREB5_CREB5at-49_1	2823	240	1379	5729	10182	4076	2334	1925	2850	2996	9703	5433	7296	3082	3334	861	6360	9237	6569	5846	2581	4110	2132	5752	3555	8287	CATCTTTGACGTCACAGGACTCTGACGTCACGGTCGCGTGTCTGTCCGCGCGCGCTTGGGAGGAGGTGGGGGGGCCTGAGAACGTCGTCGTGAGAGTTCTGCGGGCGACGGGATATCCCCGCCCGGGCAGCGCGCCGG	FALSE	2.38074	2.46229	2.40621	1.00655	0.984566	0.971449	7.15951	6.87459	6.01367	2.09143	0.203142	2.14541	1.92632	1.99813	1.92084	0.998461	0.949991	0.983289	2.5242	2.60184	3.19398
inducibleMutant_.i1.364957723_mm_chr11:74986835$scrRFX5_scrRFX5at13^CREB5_CREB5at-65^CREB5_CREB5at-49_1	653	28	198	978	1969	580	535	496	532	674	2188	1280	1654	714	771	99	1362	1649	1227	1106	514	887	528	1594	948	2352	CATCTTTGACGTCACAGGACTCTGACGTCACGGTCGCGTGTCTGTCCGCGCGCGCTTGGGAGGAGGTGGGGGGGCCTGAGAAGCAGCAGCACACTCAACTGCGGGCGACGGGATATCCCCGCCCGGGCAGCGCGCCGG	FALSE	2.31733	2.50406	2.35461	1.11949	0.793315	0.943349	5.33201	5.79971	3.73319	2.11054	0.103394	1.34387	2.30426	2.3	2.35323	0.858303	0.884985	1.05114	1.94512	2.09778	2.60833
inducible_.chr11:74986835_base_inducible_1	918	70	500	1310	2574	864	694	514	817	1003	2909	1628	2133	858	904	220	1518	2001	1954	1787	755	1385	591	1942	1162	2881	CATCTTTGACGTCACAGGACTCTGACGTCACGGTCGCGTGTCTGTCCGCGCGCGCTTGGGAGGAGGTGGGGGGGCCTGAGAAGCAGCAGCACTCTCAACTGCGGGCGACGGGATATCCCCGCCCGGGCAGCGCGCCGG	FALSE	2.56386	2.65033	2.52689	0.965416	1.01383	1.16822	5.50576	5.84472	4.28707	2.28727	0.199264	2.61612	2.33617	2.34604	2.39873	1.04914	1.14993	0.9791	1.96419	2.78004	3.50706
inducibleMutant_.i2.94066293_mm_chr11:74986835$scrRFX5_scrRFX5at13^CREB5_CREB5at-65^CREB5_CREB5at-49_1	1914	335	1008	2964	6060	3122	2150	1560	2257	2688	6942	3814	5312	1907	2339	1132	4153	5537	4825	3428	1867	3349	1732	4458	3006	6834	CATCTTTGACGTCACAGGACTCTGACGTCACGGTCGCGTGTCTGTCCGCGCGCGCTTGGGAGGAGGTGGGGGGGCCTGAGAAGCATCAGCACTCTCAACTGCGGGCGACGGGATATCCCCGCCCGGGCAGCGCGCCGG	FALSE	2.75278	2.79359	2.83132	1.31829	1.26012	1.40861	4.0211	4.4417	5.00035	1.53935	0.30782	1.70243	2.41286	2.73058	2.56006	1.16726	1.25105	1.29099	2.44539	3.08859	3.02688
Synthetic	944	1324	562	2042	3516	3029	2707	1418	2140	2166	4018	2054	3056	1939	784	1777	1758	4867	4177	2569	1642	2925	1524	3214	1829	4352	CATGACGTCATCCATGACGTCATCCATGACGTCATCCATGACGTCATCCATGACGTCATCCATGACGTCATCCATGACGTCATCCATGACGTCATCCATGACGTCATCCATGACGTCATCCATGACGTCATCCATGAC	FALSE	1.567	1.47964	1.60198	1.17852	1.17508	1.11633	2.20026	2.0468	3.85316	0.603001	0.96625	0.753867	1.71084	1.634	1.60338	1.00965	1.07463	1.11721	2.11402	2.62967	2.23096
Synthetic	3513	3659	1891	4117	7964	4260	2947	1776	2685	2937	4171	2292	3146	2306	2929	7313	5227	6732	5227	3547	2298	4721	2163	3115	1919	4356	CATGACGTCATCTTATTTTAAGACATGACGTCATCTTATTTTAAGACATGACGTCATCTTATTTTAAGACATGACGTCATCTTATTTTAAGACATGACGTCATCTTATTTTAAGACATGACGTCATCTTATTTTAAGA	FALSE	1.36779	1.38831	1.3867	1.24114	1.2397	1.27279	4.0748	4.25859	4.97778	2.06126	2.45286	2.33001	1.39425	1.44156	1.34944	1.18814	1.45843	1.33329	2.45872	2.76699	2.59004
inactive_.chr13:69900365_base_inactive_1	16328	14859	9252	8939	19770	9411	36499	10608	16515	17206	22739	12578	17273	18213	19176	42329	40333	22724	18450	14706	15170	24399	11930	17177	10000	24962	CATGGGCTTACTCCCAATGTTCATCTGTCTGTGGGACTCAAGGGCTGACTCCTAGGTGGCCACAGTGGAGCATGTCGTTCATGGCTGCACTGTGGTCTGCGCATCGTTCAGAGCCTCGGCCCATCTGTCTGGCTCCCT	TRUE	0.944122	0.964633	0.96398	0.938622	0.96545	0.944081	0.714354	0.853572	0.887894	0.773546	0.804264	0.920452	0.973438	0.95112	0.979092	0.99307	0.954335	0.931077	1.05082	1.2366	1.35962
Synthetic	29171	25910	14309	15998	30282	17798	84399	28333	44274	45679	60262	32576	44399	43689	31070	60617	55136	43731	36682	26468	38273	65091	33028	44842	26197	63750	CATGTCGTCTTCCATGTCGTCTTCCATGTCGTCTTCCATGTCGTCTTCCATGTCGTCTTCCATGTCGTCTTCCATGTCGTCTTCCATGTCGTCTTCCATGTCGTCTTCCATGTCGTCTTCCATGTCGTCTTCCATGTC	FALSE	1.04306	1.0415	1.03296	1.0451	1.07897	1.04485	0.552884	0.565408	0.726173	0.597652	0.606485	0.615628	1.05939	1.03871	1.0424	1.04447	1.06135	1.07458	0.843028	1.02493	1.02013
Synthetic	3866	4942	2391	2441	4633	2420	6374	5367	7758	8556	11170	6000	8557	8006	3692	12471	7597	6682	3999	3316	6951	11949	6185	8535	4798	12211	CATGTCGTCTTCTTATTTTAAGACATGTCGTCTTCTTATTTTAAGACATGTCGTCTTCTTATTTTAAGACATGTCGTCTTCTTATTTTAAGACATGTCGTCTTCTTATTTTAAGACATGTCGTCTTCTTATTTTAAGA	FALSE	1.05506	1.04681	1.0864	1.08033	1.03173	1.06799	1.11702	1.14542	1.3074	1.04878	1.53172	1.36212	1.10035	1.03815	1.08959	1.03516	1.06323	1.09812	0.702936	0.609748	0.697436
inducibleMutant_.i1.-933564602_mm_chr19:53400300$CREB5_CREB5at-69_1	484	355	119	381	543	173	1108	849	1154	1314	2240	1311	1742	1376	341	1083	404	640	433	235	1062	1982	873	1605	1022	2624	CATTACGGCCTCCCTTTAGACCCAAATTTATCTCGGCTGCACACAGCCCCGCAGCTCCCGAGCTGCCGCCGCTGACTTTAGAGCTTACGCACAAAGTTAGACAAGGCTGACTCACTGGGCAGAGCCAAGGTTTTCCGT	FALSE	1.23103	1.33081	1.2868	0.994324	0.892935	0.954306	1.00298	0.77228	0.537666	0.755336	0.632963	0.38999	1.20392	1.28662	1.36229	0.920199	1.02611	0.901825	0.39173	0.384135	0.287577
inducible_.chr19:53400300_base_inducible_1	1266	1244	445	1744	2980	1190	1213	807	1370	1525	3088	1778	2523	1032	829	2844	1066	2856	1623	1324	1335	2183	1078	2759	1472	4096	CATTACGTCATCCCTTTAGACCCAAATTTATCTCGGCTGCACACAGCCCCGCAGCTCCCGAGCTGCCGCCGCTGACTTTAGAGCTTACGCACAAAGTTAGACAAGGCTGACTCACTGGGCAGAGCCAAGGTTTTCCGT	FALSE	2.26275	2.40649	2.48496	1.26018	1.41343	1.47673	4.19364	3.87142	3.37825	1.80471	2.02605	1.33213	2.7594	2.47084	2.83534	1.54233	1.5069	1.48479	2.33079	1.91979	2.1603
inducibleMutant_.i1.-550667758_mm_chr4:151851770$RFX5_RFX5at-62^scrRFX5_scrRFX5at-45_1	2086	1803	827	1715	3209	1624	3796	1263	2167	2188	3605	2025	2849	2323	2438	4731	3428	3882	2809	1885	1614	2992	1449	2396	1436	3765	CATTGGCAAAGGCCAAGGCAGGCCATGCAAATCATGCAGCTCCCGCCGATGCGTGGATTGGCGGGCGCGCGCAGAGTCAGAATCCTTGGACTCGGGTTCTCATTGGCCGCGCGGCCTTGACGCAAAAGTGACGTGGGG	FALSE	1.17353	1.21761	1.24659	0.876179	0.993213	0.941258	1.31778	1.33217	1.47321	0.950216	0.938338	0.79109	1.06458	1.07083	1.15782	0.828381	0.917535	0.886637	1.40744	1.4761	1.36637
inducible_.chr4:151851770_base_inducible_1	2104	2481	1211	1743	3704	1984	5070	1819	2748	3102	5015	2740	3798	3082	3365	7119	5274	5489	3733	2804	2348	3960	2092	3480	2090	5154	CATTGGCAATGGCCAAGGCAGTCCATGCAAATCATGCAGCTCCCGCCGATGCGTGGATTGGCGGGCGCGCGCAGAGTCAGAATCCTTGGACTCGGGTTCTCATTGGCCGCGCGGCCTTGACGCAAAAGTGACGTGGGG	FALSE	1.23049	1.2418	1.25258	0.951127	0.949329	1.00582	1.00276	1.15127	1.34753	0.717583	0.966738	0.867327	1.16544	1.17471	1.19464	0.908325	0.91532	0.964841	1.49998	1.47856	1.53197
inducibleMutant_.i2.1526278911_mm_chr4:151851770$scrRFX5_scrRFX5at-45^RFX5_RFX5at-62_1	2590	2305	1214	2356	3703	2107	4905	2172	3375	3520	6449	3589	5007	3330	3602	8055	5728	5939	4147	2537	3030	4522	2629	4270	2769	6916	CATTGGCAATGGCCAAGGCAGTCCATGTAAATCATCCAGCTCCCGCCGATGCGTGGATTGGCGGGCGCGCGCAGAGTCAGAATCCTTGGACTCGGGTTCTCATTGGCCGCGCGGCCTTGACGCAAAAGTGACGTGGGG	FALSE	1.46449	1.50543	1.52832	1.05112	1.0791	1.05635	1.40101	1.18968	1.47922	0.913051	0.928372	0.898724	1.32351	1.44044	1.48367	1.08486	0.967379	1.12221	1.50208	1.52021	1.28287
inducibleMutant_.ip.722406116_mm_chr4:151851770$scrRFX5_scrRFX5at-45^RFX5_RFX5at-62_1	5167	5343	3089	3667	6468	3905	6865	3356	5438	5593	8193	4611	6454	3806	5915	12347	10609	10125	7271	4497	4442	7326	4108	5736	3714	8525	CATTGGCAATGGCCAAGGCAGTCCCCGAGAGTGATGCTCCTCCCGCCGATGCGTGGATTGGCGGGCGCGCGCAGAGTCAGAATCCTTGGACTCGGGTTCTCATTGGCCGCGCGGCCTTGACGCAAAAGTGACGTGGGG	FALSE	1.62784	1.69223	1.72362	1.42099	1.52126	1.46854	1.55803	1.48472	1.95878	1.30146	1.53757	1.63389	1.55555	1.6904	1.60012	1.39151	1.37122	1.53422	2.24053	2.33206	1.98957
inducibleMutant_.i1.-25525793_mm_chr4:151851770$scrRFX5_scrRFX5at-45^RFX5_RFX5at-62_1	2448	2176	1213	2230	3918	2073	5625	2180	3521	3841	5767	3251	4674	2914	3658	7534	6520	6684	4290	2933	2817	4843	2578	4020	2473	5954	CATTGGCAATGGCCAAGGCAGTCCGTGCAAATCAAGCAGCTCCCGCCGATGCGTGGATTGGCGGGCGCGCGCAGAGTCAGAATCCTTGGACTCGGGTTCTCATTGGCCGCGCGGCCTTGACGCAAAAGTGACGTGGGG	FALSE	1.49658	1.55833	1.63035	1.20561	1.2865	1.31724	1.15635	1.09763	1.26906	0.752529	0.764234	0.783041	1.4239	1.47012	1.45964	1.15259	1.18396	1.25753	1.93184	1.79714	1.69484
inducibleMutant_.If.-717001693_mm_chr4:151851770$scrRFX5_scrRFX5at-45^RFX5_RFX5at-62_1	5393	5797	2892	3822	7177	4039	7817	3746	5746	6584	8542	4978	6483	4641	6569	14841	12318	9337	7511	4876	4943	8107	4375	5754	3734	8873	CATTGGCAATGGCCAAGGCAGTCCTACGTTTAGTACGTCGTCCCGCCGATGCGTGGATTGGCGGGCGCGCGCAGAGTCAGAATCCTTGGACTCGGGTTCTCATTGGCCGCGCGGCCTTGACGCAAAAGTGACGTGGGG	FALSE	1.39183	1.49822	1.41986	1.30075	1.31822	1.41772	1.42612	1.44683	1.77926	1.19296	1.46505	1.3434	1.27968	1.39373	1.36579	1.26986	1.2444	1.33996	1.69442	1.97561	1.76912
inducibleMutant_.i2.-1986339837_mm_chr4:151851770$RFX5_RFX5at-62^scrRFX5_scrRFX5at-45_1	4864	4720	2695	4237	8020	4512	8921	4191	6431	6814	11282	6276	8821	5303	6340	13487	11261	10793	8381	5839	5490	9569	4913	7798	5191	12186	CATTGGCACTGGCCAAGGCATTCCATGCAAATCATGCAGCTCCCGCCGATGCGTGGATTGGCGGGCGCGCGCAGAGTCAGAATCCTTGGACTCGGGTTCTCATTGGCCGCGCGGCCTTGACGCAAAAGTGACGTGGGG	FALSE	1.6088	1.65308	1.69075	1.2736	1.29119	1.28408	1.38532	1.41669	1.74165	0.942789	1.04525	1.09696	1.51776	1.69569	1.64159	1.23432	1.28545	1.3169	1.71414	1.92925	1.85405
inducibleMutant_.ip.321028805_mm_chr4:151851770$RFX5_RFX5at-62^scrRFX5_scrRFX5at-45_1	6955	8784	4246	7405	13543	8994	6786	4706	8025	8384	14362	7863	11352	3424	5444	11667	10857	10993	8281	6059	3482	6082	3233	5709	3480	8694	CATTGGCCGTTGCCATGGCAACGCATGCAAATCATGCAGCTCCCGCCGATGCGTGGATTGGCGGGCGCGCGCAGAGTCAGAATCCTTGGACTCGGGTTCTCATTGGCCGCGCGGCCTTGACGCAAAAGTGACGTGGGG	FALSE	3.1719	3.20765	3.36993	2.21491	2.49542	2.44697	3.18285	3.14496	4.564	1.77222	2.55722	2.27202	1.72095	1.76061	1.81389	1.21247	1.26539	1.34214	2.704	2.95232	2.9797
inducibleMutant_.If.-450508069_mm_chr4:151851770$RFX5_RFX5at-62^scrRFX5_scrRFX5at-45_1	5981	6042	2886	5943	10051	5761	11549	5274	8396	8973	14553	7911	10611	6661	8154	17782	13918	14379	10279	7637	6757	11181	6250	10089	5897	14639	CATTGGCTTACCGGTTCCGTCAGCATGCAAATCATGCAGCTCCCGCCGATGCGTGGATTGGCGGGCGCGCGCAGAGTCAGAATCCTTGGACTCGGGTTCTCATTGGCCGCGCGGCCTTGACGCAAAAGTGACGTGGGG	FALSE	1.65216	1.65891	1.61919	1.27597	1.34204	1.3462	1.50095	1.37145	1.71775	0.895496	1.03354	0.907399	1.56333	1.53359	1.56999	1.20946	1.19578	1.33373	1.81808	1.88376	1.93058
inactive_.chr7:99785575_base_inactive_1	12223	1354	5555	7214	12414	5532	11363	5907	8990	9631	12943	7017	9677	9544	13065	5159	21931	18758	12098	8904	7453	12784	6756	9356	5415	13286	CCACAGTCTCCGGTTTCCTGGGCCCGCGGGTGGTTGTGACGGCGACCGCCGTCGGCGGGAACGCTCTCCTCCGAGTCGTTTTCCAGCGTCTCAGTTCCCGCAGCCTGGAGGGCGTGGCGGCGTGGCCGTCACCTTGGA	TRUE	1.02552	1.02696	1.03061	0.997413	1.00291	1.00844	1.85178	1.7216	1.67647	1.86003	0.235405	1.77516	1.01182	0.982845	0.994465	0.931057	0.954216	1.0062	1.65532	1.54738	1.57094
inducibleMutant_.i2.1909750959_mm_chr1:75260865$CREB5_CREB5at-8_1	4053	3545	1905	3089	6112	3195	6552	2634	3906	4401	5520	3049	4279	4349	4729	8085	7430	7154	5446	3641	3499	5879	2978	4142	2628	5827	CCACCTCCAAGGCGGGGTCTAGTTGCCCCTCTTGAGGCGACCCGGCCAACTGCAGGCGTGCAAGGCCGACATCTCCACCCCCGGCTCTTATGCCTATTTGCGTCATACTGGCGTAAGAGCCCCCTCTTAGCCGGGGAC	FALSE	0.959816	0.979265	1.00008	0.976034	0.956259	1.01128	1.37515	1.47002	1.6792	1.06964	1.06889	1.05577	0.983021	1.04677	0.957153	0.959247	0.962996	0.973334	1.38543	1.52863	1.40973
inducible_.chr1:75260865_base_inducible_1	3578	3099	1525	6741	12624	7186	5759	2563	4138	4119	7049	4009	5809	3571	3859	8237	5975	15947	12332	9305	3346	5839	3024	6044	3632	8752	CCACCTCCAAGGCGGGGTCTAGTTGCCCCTCTTGAGGCGACCCGGCCAACTGCAGGCGTGCAATGACGACATCTCCACCCCCGGCTCTTATGCCTATTTGCGTCATACTGGCGTAAGAGCCCCCTCTTAGCCGGGGAC	FALSE	1.49271	1.56812	1.65346	1.15664	1.23377	1.15269	3.41415	3.45434	4.29681	1.07431	1.06308	0.961544	1.74694	1.76187	1.75083	1.11715	1.16482	1.2037	3.76109	4.21559	4.38765
inducibleMutant_.i1.296949490_mm_chr1:75260865$CREB5_CREB5at-8_1	2928	2804	1584	2647	5018	2623	4639	1845	2846	3038	4096	2074	3193	3025	3631	7156	5654	6125	4453	3369	2428	4181	2217	3220	1860	4512	CCACCTCCAAGGCGGGGTCTAGTTGCCCCTCTTGAGGCGACCCGGCCAACTGCAGGCGTGCAATGACGGCCTCTCCACCCCCGGCTCTTATGCCTATTTGCGTCATACTGGCGTAAGAGCCCCCTCTTAGCCGGGGAC	FALSE	1.02394	0.957669	1.07289	0.982901	1.00171	1.00363	1.66431	1.70459	1.94706	1.09139	1.19411	1.23987	1.09868	1.06513	1.06554	0.956971	0.984612	1.04176	1.70532	1.79697	1.87534
inducibleMutant_.ip.610455158_mm_chr1:75260865$CREB5_CREB5at-8_1	2510	2712	1239	4784	10036	5441	3745	1271	1932	2039	3988	2380	3293	1965	2681	5734	4635	10695	9110	7315	1773	2888	1396	3493	2011	4944	CCACCTCCAAGGCGGGGTCTAGTTGCCCCTCTTGAGGCGACCCGGCCAACTGCAGGCGTGCAATGACGTCACCTCCACCCCCGGCTCTTATGCCTATTTGCGTCATACTGGCGTAAGAGCCCCCTCTTAGCCGGGGAC	FALSE	1.53473	1.69179	1.70338	1.04237	1.04683	1.03697	3.72602	4.22302	5.00303	1.15893	1.43063	1.20134	1.83476	1.77283	1.79739	1.07578	1.047	1.00983	4.58398	5.6594	6.26841
inducibleMutant_.If.1892076765_mm_chr1:75260865$CREB5_CREB5at-8_1	6728	5921	3265	6185	10191	5756	9216	3679	6074	6230	9292	5067	6841	6253	7442	16113	12571	13535	9137	7075	5188	9026	4432	6885	3914	9442	CCACCTCCAAGGCGGGGTCTAGTTGCCCCTCTTGAGGCGACCCGGCCAACTGCAGGCGTGCTTACTGCTGTAGTCCACCCCCGGCTCTTATGCCTATTTGCGTCATACTGGCGTAAGAGCCCCCTCTTAGCCGGGGAC	FALSE	1.12372	1.13187	1.11202	0.948156	1.03423	0.995658	1.9575	1.74257	2.15072	1.26234	1.26924	1.28643	1.13647	1.0843	1.0787	0.989207	1.02829	1.00748	1.82303	1.78373	1.90521
RFXgreatMutant_.If.-1825369433_mm_chr7:146984112$RFX5_RFX5at-58^CREB5_CREB5at-57^CREB5_CREB5at-28^CREB5_CREB5at-12^scrRFX5_scrRFX5at-8^CREB5_CREB5at18^scrCREB5_scrCREB5at21_1	7956	8825	4379	5668	9738	4811	8800	5874	8968	9566	13351	7248	10058	8837	6428	17433	11299	9308	5926	4620	7527	12983	6083	8867	5113	12395	CCACGATTCCTCCAACGGTATTGTTGATGATGCATTTGTTCTCTTGTGTCATTTTTTTATCACATCATTTTTTTCAACTTTGGTTGCTATGATAACACGGTATAGTTGTTAAATTTATTCTATTCACATTTTGTTCTA	FALSE	1.14248	1.14563	1.15688	1.07119	1.0805	1.08177	1.87868	1.74382	1.8826	1.56331	1.98117	1.80692	1.03565	1.00228	1.002	1.01553	1.0466	0.978452	0.887108	0.818599	0.880324
RFXgreatMutant_.If.-1361351961_mm_chr7:146984112$CREB5_CREB5at-57^RFX5_RFX5at-58^CREB5_CREB5at-28^CREB5_CREB5at-12^scrRFX5_scrRFX5at-8^CREB5_CREB5at18^scrCREB5_scrCREB5at21_1	5854	6725	2982	3316	5719	2649	7386	5383	8234	8373	9952	5415	7505	7330	4514	11562	7605	6817	3955	2822	6775	10793	5478	7393	4340	10488	CCACGATTCCTGCAACGGTATTGTACTTGATGCATTTGTTCTCTTGTGTCATTTTTTTATCACATCATTTTTTTCAACTTTGGTTGCTATGATAACACGGTATAGTTGTTAAATTTATTCTATTCACATTTTGTTCTA	FALSE	1.0267	1.03187	1.04071	1.18347	1.19602	1.14153	1.30952	1.22018	1.23503	1.3705	1.79876	1.46604	1.04102	1.02566	1.02215	1.102	1.04893	1.06229	0.783275	0.658653	0.648274
RFXgreatMutant_.i1.-583526385_mm_chr7:146984112$RFX5_RFX5at-58^CREB5_CREB5at-57^CREB5_CREB5at-28^CREB5_CREB5at-12^scrRFX5_scrRFX5at-8^CREB5_CREB5at18^scrCREB5_scrCREB5at21_1	5393	5895	2664	3341	5453	2376	7139	5094	7800	7870	10677	5660	7593	7396	4630	11880	7167	6567	3715	2907	6241	10197	5215	7109	4510	10385	CCACGATTCCTGGATGCCATAACAAGTTGATGCATTTGTTCTCTTGTGTCATTTTTTTATCACATCATTTTTTTCAACTTTGGTTGCTATGATAACACGGTATAGTTGTTAAATTTATTCTATTCACATTTTGTTCTA	FALSE	1.09167	1.06894	1.04351	1.10994	1.12287	1.06338	1.36504	1.20368	1.14608	1.30625	1.63131	1.35501	0.992096	1.05632	1.00308	1.00608	0.982168	1.00227	0.747816	0.613163	0.661841
RFXgreatMutant_.i1.-1990883245_mm_chr7:146984112$CREB5_CREB5at-57^RFX5_RFX5at-58^CREB5_CREB5at-28^CREB5_CREB5at-12^scrRFX5_scrRFX5at-8^CREB5_CREB5at18^scrCREB5_scrCREB5at21_1	4639	4714	1952	2461	3603	1553	6521	3863	5570	6286	7686	4177	5862	5960	3440	9680	4488	4614	2493	1886	4512	7498	3962	5236	3081	7896	CCACGATTCCTGGTTGCCAGACCAACTTGATGCATTTGTTCTCTTGTGTCATTTTTTTATCACATCATTTTTTTCAACTTTGGTTGCTATGATAACACGGTATAGTTGTTAAATTTATTCTATTCACATTTTGTTCTA	FALSE	0.975197	0.978927	0.999727	1.04452	0.995042	1.054	1.10079	0.870692	0.820094	1.23011	1.42812	1.08696	0.906767	0.895493	0.946426	0.902607	0.896209	0.94492	0.652013	0.510611	0.532845
RFXgreatMutant_.If.1509645302_mm_chr7:146984112$CREB5_CREB5at-28^RFX5_RFX5at-58^CREB5_CREB5at-57^CREB5_CREB5at-12^scrRFX5_scrRFX5at-8^CREB5_CREB5at18^scrCREB5_scrCREB5at21_1	6323	8436	3880	2787	4338	2318	2386	2942	4528	5088	4690	2711	3636	2863	1762	4980	2399	2151	1339	973	2348	3484	1978	2661	1564	3815	CCACGATTCCTGGTTGCCATAACAACTTGATGCATTTGTTCAGAACACAGTAATTTTTATCACATCATTTTTTTCAACTTTGGTTGCTATGATAACACGGTATAGTTGTTAAATTTATTCTATTCACATTTTGTTCTA	FALSE	1.23877	1.32264	1.29088	1.656	1.6839	1.77597	3.407	2.86506	3.34541	4.58234	6.98483	5.90483	0.959325	0.946308	0.951916	0.977805	0.866896	0.982046	0.632767	0.570918	0.572265
RFXgreatMutant_.i1.-323768631_mm_chr7:146984112$CREB5_CREB5at-28^RFX5_RFX5at-58^CREB5_CREB5at-57^CREB5_CREB5at-12^scrRFX5_scrRFX5at-8^CREB5_CREB5at18^scrCREB5_scrCREB5at21_1	16021	17940	7901	5642	8043	4400	6374	7473	11299	12712	10330	5673	7855	6680	3631	10337	4553	4900	2449	1837	5271	8079	4416	6051	3708	8510	CCACGATTCCTGGTTGCCATAACAACTTGATGCATTTGTTCTCTTGTGGCCTTTTTTTATCACATCATTTTTTTCAACTTTGGTTGCTATGATAACACGGTATAGTTGTTAAATTTATTCTATTCACATTTTGTTCTA	FALSE	1.1694	1.18623	1.19523	1.80284	1.80093	1.90173	2.58182	1.98848	2.3771	4.34622	5.56033	4.50108	0.93496	0.961568	0.910078	0.940789	0.861572	0.939678	0.617795	0.447535	0.463061
RFXgreatMutant_.If.1431609799_mm_chr7:146984112$CREB5_CREB5at-12^RFX5_RFX5at-58^CREB5_CREB5at-57^CREB5_CREB5at-28^scrRFX5_scrRFX5at-8^CREB5_CREB5at18^scrCREB5_scrCREB5at21_1	8499	10864	5068	4866	8123	4212	4601	4296	6756	7190	9017	4960	7103	5147	3865	10547	5970	5761	2987	2503	4508	7759	3807	5166	3202	7827	CCACGATTCCTGGTTGCCATAACAACTTGATGCATTTGTTCTCTTGTGTCATTTTTTATAGTGTAGTAATTTTTCAACTTTGGTTGCTATGATAACACGGTATAGTTGTTAAATTTATTCTATTCACATTTTGTTCTA	FALSE	1.32479	1.34605	1.40272	1.34508	1.39755	1.396	3.08479	2.78214	3.15241	3.19411	4.66474	3.99973	1.03596	1.07767	1.08634	1.04425	1.0739	1.05137	0.942689	0.708427	0.818865
RFXgreatMutant_.i1.-1408146231_mm_chr7:146984112$CREB5_CREB5at-12^RFX5_RFX5at-58^CREB5_CREB5at-57^CREB5_CREB5at-28^scrRFX5_scrRFX5at-8^CREB5_CREB5at18^scrCREB5_scrCREB5at21_1	10068	12659	6082	5100	7902	4198	4829	4934	7544	8330	8409	4375	6365	4958	3554	8894	4981	4530	2563	1915	4024	7000	3467	4647	2652	7054	CCACGATTCCTGGTTGCCATAACAACTTGATGCATTTGTTCTCTTGTGTCATTTTTTTATCACAGCCTTTTTTTCAACTTTGGTTGCTATGATAACACGGTATAGTTGTTAAATTTATTCTATTCACATTTTGTTCTA	FALSE	1.28256	1.23255	1.30489	1.60373	1.62005	1.67899	3.08048	2.57866	2.99358	3.60513	5.17884	4.57336	0.967405	0.926582	1.01638	0.96767	1.00578	0.993972	0.769514	0.631039	0.650381
RFXgreatMutant_.If.-363268728_mm_chr7:146984112$CREB5_CREB5at18^RFX5_RFX5at-58^CREB5_CREB5at-57^CREB5_CREB5at-28^CREB5_CREB5at-12^scrRFX5_scrRFX5at-8^scrCREB5_scrCREB5at21_1	11477	14219	6249	9224	14801	7867	13385	8625	14016	14654	23399	12028	15902	13270	8274	23752	13268	12327	6788	5456	11750	19397	9881	13644	7960	19568	CCACGATTCCTGGTTGCCATAACAACTTGATGCATTTGTTCTCTTGTGTCATTTTTTTATCACATCATTTTTTTCAACTTTGGTTGCATACTATTGTGCGTATAGTTGTTAAATTTATTCTATTCACATTTTGTTCTA	FALSE	1.33341	1.26606	1.21804	1.04743	1.12457	1.10356	2.01005	1.74256	2.02394	1.48267	2.09865	1.69527	1.06124	1.0391	1.05342	1.05571	1.0413	1.05842	0.782368	0.624432	0.692323
RFXgreatMutant_.If.228227683_mm_chr7:146984112$scrCREB5_scrCREB5at21^RFX5_RFX5at-58^CREB5_CREB5at-57^CREB5_CREB5at-28^CREB5_CREB5at-12^scrRFX5_scrRFX5at-8^CREB5_CREB5at18_1	12313	14638	6041	7445	12268	5887	13819	9064	14256	15745	20820	11014	15034	13728	8686	24001	13082	12616	7313	5330	11909	19663	10217	14608	8475	20631	CCACGATTCCTGGTTGCCATAACAACTTGATGCATTTGTTCTCTTGTGTCATTTTTTTATCACATCATTTTTTTCAACTTTGGTTGCTATCTATTGTGCCATTAGTTGTTAAATTTATTCTATTCACATTTTGTTCTA	FALSE	1.14686	1.12065	1.11314	1.06402	1.10566	1.14616	1.57143	1.39898	1.46698	1.54071	2.09264	1.58737	1.09831	1.06942	1.07359	1.03429	1.02036	1.0579	0.773997	0.650283	0.65377
putativeConstitWgreatRFXsite_.chr7:146984112_base_RFX25_great_tiles_from_constitK27_CBP_peaks_1	14668	18721	8628	8580	13114	7469	7985	6734	10222	11368	14535	7636	10513	7350	5152	14448	7954	7397	3812	3169	6191	10214	5164	7297	4188	10505	CCACGATTCCTGGTTGCCATAACAACTTGATGCATTTGTTCTCTTGTGTCATTTTTTTATCACATCATTTTTTTCAACTTTGGTTGCTATGATAACACGGTATAGTTGTTAAATTTATTCTATTCACATTTTGTTCTA	FALSE	1.49543	1.45114	1.45386	1.47647	1.48075	1.54564	3.13414	2.58806	3.22102	3.17636	4.63174	3.92357	1.02471	0.987043	1.02102	1.00427	0.989963	0.998678	0.847604	0.633111	0.726006
RFXgreatMutant_.i1.-1807852382_mm_chr7:146984112$scrCREB5_scrCREB5at21^RFX5_RFX5at-58^CREB5_CREB5at-57^CREB5_CREB5at-28^CREB5_CREB5at-12^scrRFX5_scrRFX5at-8^CREB5_CREB5at18_1	13306	16806	8031	7785	12287	6972	9801	7044	10893	11967	16614	8942	11943	9109	6177	16210	9333	8743	4752	3981	7462	12834	6795	8854	5097	12751	CCACGATTCCTGGTTGCCATAACAACTTGATGCATTTGTTCTCTTGTGTCATTTTTTTATCACATCATTTTTTTCAACTTTGGTTGCTATGATAAGACGGTATAGTTGTTAAATTTATTCTATTCACATTTTGTTCTA	FALSE	1.37925	1.37119	1.33268	1.2462	1.27324	1.31288	2.31683	1.97556	2.44959	2.34753	3.38754	2.9754	1.00325	0.969306	0.999998	0.976698	1.00369	1.06034	0.808378	0.636825	0.735914
RFXgreatMutant_.i1.-1618115562_mm_chr7:146984112$CREB5_CREB5at18^RFX5_RFX5at-58^CREB5_CREB5at-57^CREB5_CREB5at-28^CREB5_CREB5at-12^scrRFX5_scrRFX5at-8^scrCREB5_scrCREB5at21_1	12517	14640	6340	6166	9473	4765	9124	6661	10169	10896	14180	7443	10366	8062	4828	14585	6858	7620	3926	2921	6670	12162	6311	8448	4691	11903	CCACGATTCCTGGTTGCCATAACAACTTGATGCATTTGTTCTCTTGTGTCATTTTTTTATCACATCATTTTTTTCAACTTTGGTTGCTATGATAGCCCGGTATAGTTGTTAAATTTATTCTATTCACATTTTGTTCTA	FALSE	1.33006	1.28955	1.30692	1.33148	1.34298	1.35063	1.97117	1.63613	1.79839	2.37219	3.1699	2.52319	1.08157	1.00795	1.05473	0.986413	1.07466	1.11271	0.796044	0.594459	0.61009
RFXgreatMutant_.i1.-1263310511_mm_chr7:146984112$scrRFX5_scrRFX5at-8^RFX5_RFX5at-58^CREB5_CREB5at-57^CREB5_CREB5at-28^CREB5_CREB5at-12^CREB5_CREB5at18^scrCREB5_scrCREB5at21_1	12108	14660	6590	9307	13115	7636	7308	5144	7754	8352	13862	7344	9597	5790	4515	12630	6592	6636	3749	2530	5056	7982	4318	6226	3495	8405	CCACGATTCCTGGTTGCCATAACAACTTGATGCATTTGTTCTCTTGTGTCATTTTTTTATCGCATCATTTTATTCAACTTTGGTTGCTATGATAACACGGTATAGTTGTTAAATTTATTCTATTCACATTTTGTTCTA	FALSE	1.81045	1.77168	1.68476	1.43173	1.42587	1.44153	3.71464	2.82803	3.5981	2.86489	3.96301	3.27441	1.10987	1.04565	1.03701	1.04113	0.982072	1.06006	0.965278	0.790408	0.735779
RFXgreatMutant_.If.1002802797_mm_chr7:146984112$scrRFX5_scrRFX5at-8^RFX5_RFX5at-58^CREB5_CREB5at-57^CREB5_CREB5at-28^CREB5_CREB5at-12^CREB5_CREB5at18^scrCREB5_scrCREB5at21_1	8395	10105	5103	4219	6447	3494	3069	3789	5272	6033	6948	3978	5462	3564	2685	6963	4183	3805	2027	1539	3240	5591	2666	3847	2269	5528	CCACGATTCCTGGTTGCCATAACAACTTGATGCATTTGTTCTCTTGTGTCATTTTTTTATCTGTAGTAAAAAAAGTTCTTTGGTTGCTATGATAACACGGTATAGTTGTTAAATTTATTCTATTCACATTTTGTTCTA	FALSE	1.47421	1.55905	1.55774	1.71327	1.57496	1.69163	4.00976	3.31036	3.92042	4.72997	6.50473	6.03775	1.11411	1.10284	1.10804	1.08388	1.11754	1.06328	0.89917	0.694273	0.72712
RFXgreatMutant_.i1.738170157_mm_chr6:204470232$RFX5_RFX5at-49^CREB5_CREB5at-51^scrCREB5_scrCREB5at-46^scrCREB5_scrCREB5at-35^CREB5_CREB5at-33^scrRFX5_scrRFX5at4^CREB5_CREB5at48_1	1534	1121	563	828	1441	779	1773	654	955	986	1670	836	1017	1329	1603	3311	2470	2501	1365	859	883	1548	598	1272	687	1648	CCACTGTTCGAATAAGTGCATGATGCCATGGAAAGCCAATTCATCATTACCATCATCAACAGTTACTAAACGCCTGCTAGTGCTGTTCTGAGTTACTTCCTACTTAGAAAAGAAAGAGATGATGTTTGCTGTGAGAGA	FALSE	0.950232	0.878645	0.777818	0.793033	0.765087	0.741417	1.36216	1.28077	1.51299	1.49607	1.24907	1.15304	0.98788	0.895465	0.885845	0.792157	0.829767	0.639592	1.58494	1.25378	1.08836
RFXgreatMutant_.i1.-285319121_mm_chr6:204470232$scrCREB5_scrCREB5at-46^CREB5_CREB5at-51^RFX5_RFX5at-49^scrCREB5_scrCREB5at-35^CREB5_CREB5at-33^scrRFX5_scrRFX5at4^CREB5_CREB5at48_1	1574	1686	778	1065	1588	760	2235	1051	1728	1716	2381	1149	1630	1519	1857	3877	2935	2255	1394	1147	1444	2463	1197	1669	966	2439	CCACTGTTCGAATAAGTGCATGTTGCCAGGCAAACCCAATTCATCATTACCATCATCAACAGTTACTAAACGCCTGCTAGTGCTGTTCTGAGTTACTTCCTACTTAGAAAAGAAAGAGATGATGTTTGCTGTGAGAGA	FALSE	1.18533	1.05656	1.09072	1.11502	1.21121	1.12894	1.38988	1.11966	1.17096	1.21776	1.49029	1.264	1.13407	1.10163	1.14704	1.1334	1.15509	1.12012	1.2503	1.12026	1.27148
RFXgreatMutant_.i1.-1164875279_mm_chr6:204470232$scrCREB5_scrCREB5at-35^CREB5_CREB5at-51^RFX5_RFX5at-49^scrCREB5_scrCREB5at-46^CREB5_CREB5at-33^scrRFX5_scrRFX5at4^CREB5_CREB5at48_1	1229	1243	601	714	1220	543	1173	648	1003	973	1385	759	1104	1089	865	2177	1614	1380	837	636	797	1431	674	855	507	1338	CCACTGTTCGAATAAGTGCATGTTGCCATGGAAACCCAAGTCATCATTACCATCATCAACAGTTACTAAACGCCTGCTAGTGCTGTTCTGAGTTACTTCCTACTTAGAAAAGAAAGAGATGATGTTTGCTGTGAGAGA	FALSE	0.961745	0.973523	1.03044	0.958927	0.980631	0.892885	1.77544	1.63899	1.59407	1.81171	2.09345	1.86047	0.810365	0.806486	0.877716	0.872582	0.9361	0.879749	1.06727	0.938235	0.98341
RFXgreatMutant_.i1.164344947_mm_chr6:204470232$CREB5_CREB5at-33^CREB5_CREB5at-51^RFX5_RFX5at-49^scrCREB5_scrCREB5at-46^scrCREB5_scrCREB5at-35^scrRFX5_scrRFX5at4^CREB5_CREB5at48_1	3635	3717	1700	1975	3019	1435	2427	1191	1798	1894	2805	1393	1925	1923	2233	5133	4221	3253	2103	1369	1412	2538	1121	1659	906	2299	CCACTGTTCGAATAAGTGCATGTTGCCATGGAAACCCAATTCAGCCTTACCATCATCAACAGTTACTAAACGCCTGCTAGTGCTGTTCTGAGTTACTTCCTACTTAGAAAAGAAAGAGATGATGTTTGCTGTGAGAGA	FALSE	1.10304	1.01182	1.0175	0.998093	0.995504	0.984264	2.37357	1.96023	2.03605	2.58982	3.02561	2.54346	0.89045	0.816142	0.854054	0.87545	0.940205	0.828615	1.42472	1.33498	1.19875
RFXgreatMutant_.If.1044849285_mm_chr6:204470232$CREB5_CREB5at48^CREB5_CREB5at-51^RFX5_RFX5at-49^scrCREB5_scrCREB5at-46^scrCREB5_scrCREB5at-35^CREB5_CREB5at-33^scrRFX5_scrRFX5at4_1	2764	2993	1305	1469	2691	1246	2572	1409	2068	1917	3358	1763	2288	1968	2137	5308	3903	3006	2115	1501	1471	2409	1147	1870	1172	2913	CCACTGTTCGAATAAGTGCATGTTGCCATGGAAACCCAATTCATCATTACCATCATCAACAGTTACTAAACGCCTGCTAGTGCTGTTCTGAGTTACTTCCTACTTAGAAAAGAAAGACTACTACAAACGTGTGAGAGA	FALSE	1.29031	1.25129	1.18172	1.15378	1.11881	0.973437	1.66593	1.64876	1.66822	1.85824	2.29893	1.84241	0.980751	1.03162	1.0574	0.891176	0.872011	0.828448	1.28644	1.3119	1.28428
RFXgreatMutant_.i1.1324811868_mm_chr6:204470232$CREB5_CREB5at48^CREB5_CREB5at-51^RFX5_RFX5at-49^scrCREB5_scrCREB5at-46^scrCREB5_scrCREB5at-35^CREB5_CREB5at-33^scrRFX5_scrRFX5at4_1	2436	2686	1326	1081	2409	1236	2085	945	1470	1523	2238	1124	1559	1596	1984	4415	3063	3061	1584	1204	1112	1803	1064	1248	800	1746	CCACTGTTCGAATAAGTGCATGTTGCCATGGAAACCCAATTCATCATTACCATCATCAACAGTTACTAAACGCCTGCTAGTGCTGTTCTGAGTTACTTCCTACTTAGAAAAGAAAGAGATGATGGTCGCTGTGAGAGA	FALSE	1.06039	0.983707	0.992876	0.954196	0.980657	0.953625	1.51226	1.82073	2.04136	2.02025	2.54501	2.30932	0.807094	0.868308	0.781514	0.830706	0.804773	0.947623	1.61531	1.21154	1.27028
putativeConstitWgreatRFXsite_.chr6:204470232_base_RFX25_great_tiles_from_constitK27_CBP_peaks_1	1988	2100	995	1035	2050	990	1409	653	1051	1088	1756	834	1038	1226	1614	3788	2457	2142	1324	872	854	1400	732	889	521	1255	CCACTGTTCGAATAAGTGCATGTTGCCATGGAAACCCAATTCATCATTACCATCATCAACAGTTACTAAACGCCTGCTAGTGCTGTTCTGAGTTACTTCCTACTTAGAAAAGAAAGAGATGATGTTTGCTGTGAGAGA	FALSE	1.08311	0.950184	0.860575	0.858344	0.912735	0.886848	2.14257	2.29275	2.41953	2.43972	2.94441	2.56424	0.748434	0.736146	0.731272	0.830507	0.813482	0.848686	1.47148	1.31829	1.19765
RFXgreatMutant_.If.-1230429930_mm_chr6:204470232$scrRFX5_scrRFX5at4^CREB5_CREB5at-51^RFX5_RFX5at-49^scrCREB5_scrCREB5at-46^scrCREB5_scrCREB5at-35^CREB5_CREB5at-33^CREB5_CREB5at48_1	1397	1533	676	1334	2796	1641	1294	500	905	943	3135	1569	2003	983	1189	2623	2170	1700	1157	767	534	1191	602	878	520	1289	CCACTGTTCGAATAAGTGCATGTTGCCATGGAAACCCAATTCATCATTACCATCATCAACAGTTACTAAACGCGACGATCACGACAAGAGAGTTACTTCCTACTTAGAAAAGAAAGAGATGATGTTTGCTGTGAGAGA	FALSE	2.41169	2.22947	2.07114	0.8197	0.980229	0.958669	3.00696	3.405	4.36697	1.86679	2.34044	1.89696	0.921899	0.916361	0.936753	0.647684	0.863115	0.870502	1.45653	1.43679	1.31385
RFXgreatMutant_.If.-1167152217_mm_chr6:204470232$CREB5_CREB5at-33^CREB5_CREB5at-51^RFX5_RFX5at-49^scrCREB5_scrCREB5at-46^scrCREB5_scrCREB5at-35^scrRFX5_scrRFX5at4^CREB5_CREB5at48_1	114	92	57	67	168	60	107	66	118	110	208	76	94	104	125	273	164	138	110	72	84	169	103	107	95	138	CCACTGTTCGAATAAGTGCATGTTGCCATGGAAACCGTTAAGTAGTAAACCATCATCAACAGTTACTAAACGCCTGCTAGTGCTGTTCTGAGTTACTTCCTACTTAGAAAAGAAAGAGATGATGTTTGCTGTGAGAGA	FALSE	1.51241	1.02073	0.918706	1.0227	1.20804	1.05699	1.8264	2.47423	1.93096	1.84228	1.69861	1.93436	1.06192	1.58237	0.947919	0.96299	1.15761	1.40777	1.11756	1.29114	1.16575
RFXgreatMutant_.i1.-1246117052_mm_chr6:204470232$CREB5_CREB5at-51^RFX5_RFX5at-49^scrCREB5_scrCREB5at-46^scrCREB5_scrCREB5at-35^CREB5_CREB5at-33^scrRFX5_scrRFX5at4^CREB5_CREB5at48_1	1828	1761	880	1279	1668	857	2481	1127	1864	2081	2239	1297	1762	1611	2129	4458	3673	3236	1885	1318	1667	2841	1475	1686	1056	2272	CCACTGTTCGAATAAGTGCATGTTGGCCTGGAAACCCAATTCATCATTACCATCATCAACAGTTACTAAACGCCTGCTAGTGCTGTTCTGAGTTACTTCCTACTTAGAAAAGAAAGAGATGATGTTTGCTGTGAGAGA	FALSE	1.05099	1.12454	1.11171	1.12737	1.23192	1.29088	1.50366	1.05946	1.18949	1.27404	1.40224	1.28796	1.0802	1.1355	1.00748	1.23372	1.25628	1.30144	1.69176	1.42833	1.37761
RFXgreatMutant_.If.-272922398_mm_chr6:204470232$CREB5_CREB5at-51^RFX5_RFX5at-49^scrCREB5_scrCREB5at-46^scrCREB5_scrCREB5at-35^CREB5_CREB5at-33^scrRFX5_scrRFX5at4^CREB5_CREB5at48_1	1151	1204	480	678	1452	631	1630	733	1173	1245	1636	926	1181	1199	1181	3054	2268	1748	1195	883	1028	1649	889	1152	732	1858	CCACTGTTCGAATAAGTGGTACAACGGTACGAAACCCAATTCATCATTACCATCATCAACAGTTACTAAACGCCTGCTAGTGCTGTTCTGAGTTACTTCCTACTTAGAAAAGAAAGAGATGATGTTTGCTGTGAGAGA	FALSE	1.03182	1.07876	1.00118	0.985198	1.04162	1.03767	1.21324	1.40376	1.33305	1.22102	1.45925	1.0693	0.991689	1.05757	1.10701	1.02223	0.979742	1.05392	1.22785	1.21664	1.24007
inducibleMutant_.ip.792786372_mm_chr13:75227285$CREB5_CREB5at-60_1	2372	2007	989	3431	5096	3006	3687	2060	3063	3354	10451	5077	6528	3804	2224	5488	3321	6792	3803	2850	2863	4767	2374	7430	3787	9272	CCAGGTAGAAATGACGTCACCAGATGGCTTTCGTCGATTTGACGTGTAAACACTCATTTCTATTCTGGTTGGTAAGGCTGGGGCTCCACTCAGTCGGGAGACTGAAGCACTTTAGTGAGCGCTCGCTCTCGCCGCCCA	FALSE	2.07757	1.86423	1.7443	0.872701	0.857312	0.881116	2.71427	2.17807	2.80751	1.11244	1.07539	0.974024	2.016	1.72453	1.74124	0.897339	0.892719	0.887088	1.50377	1.22039	1.26157
inducibleMutant_.If.954779215_mm_chr13:75227285$CREB5_CREB5at-60_1	1345	1154	553	881	1251	609	2707	1602	2211	2479	3096	1731	2315	3005	1330	3914	1923	1992	1217	889	1974	3308	1818	2324	1324	3323	CCAGGTAGAAGACTGCAGTTCAGATGGCTTTCGTCGATTTGACGTGTAAACACTCATTTCTATTCTGGTTGGTAAGGCTGGGGCTCCACTCAGTCGGGAGACTGAAGCACTTTAGTGAGCGCTCGCTCTCGCCGCCCA	FALSE	0.779103	0.804609	0.783048	0.859126	0.783388	0.824409	0.949278	0.728255	0.774703	0.859149	0.842185	0.741794	0.798241	0.763239	0.789972	0.78321	0.784208	0.859956	0.558303	0.494379	0.498153
inducibleMutant_.i2.1653849924_mm_chr13:75227285$CREB5_CREB5at-60_1	1204	1014	456	921	1283	532	2738	1560	2500	2788	3405	1908	2576	2574	1412	3403	1422	1932	1060	768	2121	3628	1681	2440	1530	3805	CCAGGTAGATCGGCCGTCAAGAGATGGCTTTCGTCGATTTGACGTGTAAACACTCATTTCTATTCTGGTTGGTAAGGCTGGGGCTCCACTCAGTCGGGAGACTGAAGCACTTTAGTGAGCGCTCGCTCTCGCCGCCCA	FALSE	1.00034	1.03539	1.01723	0.976685	1.0341	1.08242	0.981142	0.738428	0.66909	0.760374	0.731635	0.604753	0.978416	1.02967	1.05602	0.982444	1.00408	0.928295	0.632155	0.502703	0.50241
inducibleMutant_.i1.-1113719110_mm_chr13:75227285$CREB5_CREB5at-60_1	1495	1422	707	1027	1909	819	3400	1915	2743	3064	4104	2083	3068	2723	1931	3874	2709	2623	1623	1184	2708	4259	2162	3072	1866	4253	CCAGGTAGATCTGACGGCCAGAGATGGCTTTCGTCGATTTGACGTGTAAACACTCATTTCTATTCTGGTTGGTAAGGCTGGGGCTCCACTCAGTCGGGAGACTGAAGCACTTTAGTGAGCGCTCGCTCTCGCCGCCCA	FALSE	1.13972	1.0685	1.14522	1.13334	1.07253	1.12448	0.881043	0.884793	0.82949	0.76032	0.826248	0.75507	1.16444	1.18708	1.11577	1.18571	1.11422	1.12859	0.811289	0.727587	0.732166
inducible_.chr13:75227285_base_inducible_1	2682	2340	1194	3805	6831	3943	5079	2775	4162	4549	13548	6240	8783	4413	2829	6320	4490	8436	4596	4027	3527	5760	3248	9210	4923	12092	CCAGGTAGATCTGACGTCAAGAGATGGCTTTCGTCGATTTGACGTGTAAACACTCATTTCTATTCTGGTTGGTAAGGCTGGGGCTCCACTCAGTCGGGAGACTGAAGCACTTTAGTGAGCGCTCGCTCTCGCCGCCCA	FALSE	2.32156	1.97507	2.02298	1.01337	1.00415	1.03013	2.18515	2.11944	2.67334	0.913093	0.910181	0.853636	2.15411	1.93247	1.95745	0.9529	0.92982	1.04619	1.61001	1.27134	1.53657
activeMutant_.ip.-271818194_mm_chr14:30781530$scrRFX5_scrRFX5at-68^RFX5_RFX5at-37^RFX5_RFX5at-19_1	4516	4246	2123	2748	5007	2123	6651	2928	4140	4341	5406	3286	4374	4075	5300	11222	9415	6793	5154	3705	3604	6366	3119	4114	2508	6328	CCCGAGAGTGATGCTCCTCTCCTGACTCAGGCAGTATCCACGCCAGCGGAAGTTACTTGTGTGACTGGGCGGAACCTCTAGTCAGGAGTGGTCTCCCAGCAGCCAATGGGCTCGACCCACCTCTAGCCTGACTTGGGT	FALSE	1.0032	1.12635	1.09102	1.15793	1.0817	1.06457	1.20513	1.18633	1.09918	1.17409	1.2612	1.15907	1.04203	1.06615	1.10934	1.05447	1.11288	1.08796	1.40397	1.54394	1.53097
RFXrandMutant_.If.-1936714424_mm_chr12:116082980$scrRFX5_scrRFX5at-26^RFX5_RFX5at-36^CREB5_CREB5at-9_1	1277	1200	624	718	1273	765	1882	1162	1791	1848	2674	1386	1986	1786	1476	3661	2417	2179	1353	1126	1553	2682	1288	1775	1081	2890	CCGGCTCCTGCCTGGAGCTCTGTAACTGCTGACAGTTGCTGTACTTTGCATAGACCGTCCTGTGACATAGTTGGAGCTTTGTGTACCTAAAAAAAAAAATTCCTTTGTAGGCCTTGGCAAATTAACATTTGAAAAGGT	FALSE	1.13219	1.08396	1.13026	1.04849	1.06769	1.03403	1.11278	1.06592	1.39974	1.17329	1.25965	1.20396	1.02579	1.04848	1.15596	1.03673	1.06976	1.02509	1.02754	0.924763	1.0616
RFXrandMutant_.i1.2083496097_mm_chr12:116082980$scrRFX5_scrRFX5at-26^RFX5_RFX5at-36^CREB5_CREB5at-9_1	1150	1320	610	901	1550	710	1666	1271	1828	1847	2429	1435	1996	1494	1112	2906	1981	1941	1399	987	1539	2731	1340	1832	1098	2631	CCGGCTCCTGCCTGGAGCTCTGTAACTGCTGACAGTTGCTGTAGAAACGTATCAGGCAGCTGTGACATAGTTGGAGCTTTGTGTACCTAAAAAAAAAAATTCCTTTGTAGGCCTTGGCAAATTAACATTTGAAAAGGT	FALSE	1.22946	1.34163	1.35798	1.37099	1.30274	1.23546	1.57745	1.46613	1.46754	1.1936	1.56527	1.32954	1.26566	1.27312	1.25804	1.22818	1.30221	1.27491	1.09421	1.14309	1.11243
RFXrandMutant_.If.-139334970_mm_chr12:116082980$CREB5_CREB5at-9^RFX5_RFX5at-36^scrRFX5_scrRFX5at-26_1	1410	1384	601	672	1123	474	1276	1026	1458	1571	1879	988	1429	1296	990	2892	1463	1541	723	546	1154	2128	983	1361	862	1885	CCGGCTCCTGCCTGGAGCTCTGTAACTGCTGACAGTTGCTGTAGAAACGTATCTGGCAGCACACTGTATCAAGGAGCTTTGTGTACCTAAAAAAAAAAATTCCTTTGTAGGCCTTGGCAAATTAACATTTGAAAAGGT	FALSE	1.09638	1.06484	1.12075	1.2758	1.1978	1.21138	1.53612	1.3869	1.27919	1.91075	2.14277	1.71029	1.08392	1.15218	1.03904	1.06164	1.16971	1.07814	1.00143	0.681001	0.709403
RFXrandMutant_.i1.-734172957_mm_chr12:116082980$CREB5_CREB5at-9^RFX5_RFX5at-36^scrRFX5_scrRFX5at-26_1	2196	2194	1083	1449	2189	983	2245	1278	1928	2041	2640	1487	1875	2204	1690	4809	2922	3196	1806	1331	1730	2792	1409	2132	1180	3055	CCGGCTCCTGCCTGGAGCTCTGTAACTGCTGACAGTTGCTGTAGAAACGTATCTGGCAGCTGTGACAGACTTGGAGCTTTGTGTACCTAAAAAAAAAAATTCCTTTGTAGGCCTTGGCAAATTAACATTTGAAAAGGT	FALSE	0.905796	0.942392	0.864712	0.934454	0.931382	0.925427	1.8826	1.53654	1.5078	1.69142	1.93068	1.7517	0.998431	0.927443	0.990205	0.935859	0.902431	0.908712	1.22129	1.00028	1.01688
putativeConstitWgoodRFXsite_.chr12:116082980_base_RFX25_great_tiles_from_constitK27_CBP_peaks_1	1428	1570	756	1177	1818	965	1765	833	1130	1264	1501	887	1185	1317	1289	3725	2635	2216	1636	1120	1074	1855	881	1100	651	1758	CCGGCTCCTGCCTGGAGCTCTGTAACTGCTGACAGTTGCTGTAGAAACGTATCTGGCAGCTGTGACATAGTTGGAGCTTTGTGTACCTAAAAAAAAAAATTCCTTTGTAGGCCTTGGCAAATTAACATTTGAAAAGGT	FALSE	0.861853	0.940741	0.914565	1.01929	0.913535	0.959118	1.94508	1.62317	1.88273	1.399	1.7573	1.55533	0.862083	0.856273	0.953583	0.972286	1.00339	0.950861	1.41713	1.51639	1.43198
RFXrandMutant_.If.398295615_mm_chr12:116082980$RFX5_RFX5at-36^scrRFX5_scrRFX5at-26^CREB5_CREB5at-9_1	1456	1384	741	858	1498	728	2066	1457	2080	2377	2819	1693	2079	1983	1479	3911	2488	2422	1542	1176	2205	3331	1663	2281	1225	3071	CCGGCTCCTGCCTGGAGCTCTGTAACTGCTGACTCAACGACATCTTTGCTATCTGGCAGCTGTGACATAGTTGGAGCTTTGTGTACCTAAAAAAAAAAATTCCTTTGTAGGCCTTGGCAAATTAACATTTGAAAAGGT	FALSE	1.07501	1.19252	1.06565	1.18406	1.11679	1.19789	1.21133	1.14261	1.21341	1.21861	1.32341	1.30237	1.18726	1.07011	1.10632	1.32575	1.19664	1.19205	1.02867	0.94924	0.998596
inactive_.chr1:54764970_base_inactive_1	2544	2332	1244	1632	3010	1460	4029	2423	3628	3931	5245	2745	3904	3803	3051	6763	5149	4359	3081	1916	3059	5232	2667	3829	2187	5309	CCTCACATCAGATCTTTTATGAATGGCTGATCCCAGATGGTGGTGCCGTCAGAAGCATGAGTTTAATACGGCATCTAGTTTCTTTTTGCTCCAGCATATCGTGTCATTTCCAACTGCTTCACTTAGTGGGCAAAGCAG	TRUE	1.04294	1.0082	1.04344	1.02675	1.01572	1.03297	1.18149	1.17729	1.24785	1.09183	1.14346	1.12117	1.03921	0.996184	0.997268	0.959023	0.980058	0.996835	0.965351	0.988962	0.848349
inducibleMutant_.i2.-258728401_mm_chr1:55109510$RFX5_RFX5at-69^RFX5_RFX5at43^CREB5_CREB5at49_1	4212	2405	2097	3821	8011	4713	6419	2392	3712	3882	7087	3706	5086	3983	5034	6465	9528	8508	7582	5509	3138	5431	2844	5390	2950	7279	CCTCACGAAGATTTCATAAGTGGCAGACTCCTGGCAGGAGCAGAGCGTGTCCCGGAGATCCGCGCCCCGATTGGCTGTCCCGAGGCGGCACTGGACACGTGCGTCAGCCTAGCGTCAGCGTGGCGTCATGGGGTTGGG	FALSE	1.34552	1.29965	1.29792	0.967809	0.992271	0.973993	1.73626	1.96668	2.52834	1.13463	0.74018	1.18625	1.39676	1.28301	1.30553	0.93933	0.971359	1.01495	1.79904	2.32374	2.32899
activeMutant_.If.1752940762_mm_chr9:102582536$scrCREB5_scrCREB5at12^scrRFX5_scrRFX5at-27_1	101	25	42	96	186	169	99	33	44	58	189	106	152	58	75	46	150	248	197	132	93	67	38	117	49	203	CCTGCGTCAATCACGCGCCTCGCGTGCGTCAGCGCCGCGCGGCTCCAGGTCCTGCTCCCCCCCTTCAAGCCTTTGAATGGAATGTTACATCGTGCGCCCTCCTTCCTTCCGAGGCTGGATTGGAACCCGCCGCAGTGC	FALSE	2.46418	2.55276	2.66378	0.916905	0.807713	0.999334	2.82841	2.96069	5.87838	1.76409	0.498878	1.5405	2.08209	1.46347	2.50031	1.91175	0.822919	0.931284	3.60121	4.14622	3.83223
activeMutant_.If.-210962963_mm_chr9:102582536$scrRFX5_scrRFX5at-27^scrCREB5_scrCREB5at12_1	136	31	46	44	261	169	183	103	147	203	545	259	284	162	196	108	276	458	430	127	290	324	171	293	151	413	CCTGCGTCAATCACGCGCCTCGCGTGCGTCAGCGCCGCGCGGGAGGTCCAGGACGAGGCCCCCTTCAAGCCTTTGAATGGATACAATGTAGCAGCGCCCTCCTTCCTTCCGAGGCTGGATTGGAACCCGCCGCAGTGC	FALSE	2.54401	2.23314	1.78191	1.02462	0.966128	1.25225	0.701305	2.24752	3.18011	1.28506	0.334657	0.912753	1.86679	1.61465	1.82121	2.13432	1.42476	1.5004	2.38109	3.24017	1.32006
RFXrandMutant_.i1.-1263219564_mm_chr18:98578602$scrCREB5_scrCREB5at-43^scrCREB5_scrCREB5at-12^scrRFX5_scrRFX5at-2^CREB5_CREB5at5^RFX5_RFX5at24_1	598	663	303	309	465	135	901	594	992	1153	1469	815	1121	1031	459	1502	638	631	369	248	924	1596	804	1019	638	1519	CCTTCCACTCCCCCCACCCCAAACCCTATAAGTCAAAAGGCTCTTTTCAGGCGGAGATACAATTCAAGCACCATCATTATGAAAACCCTGCCTGGTTTCTGTGGTTACTGACAACCCCCTTTTGTGTAGATCTCATTA	FALSE	1.07746	1.10416	1.10517	0.928467	1.02444	1.11759	1.00032	0.813285	0.515959	1.14765	1.45371	1.22114	1.02014	1.07196	1.05251	1.06854	1.10277	1.10847	0.515461	0.4369	0.40504
RFXrandMutant_.i1.-1801064308_mm_chr18:98578602$scrCREB5_scrCREB5at-12^scrCREB5_scrCREB5at-43^scrRFX5_scrRFX5at-2^CREB5_CREB5at5^RFX5_RFX5at24_1	440	427	124	202	330	152	662	633	951	892	1230	659	875	746	289	943	389	421	257	162	801	1289	650	811	516	1359	CCTTCCACTCCCCCCACCCCAAACCCTATAATTAAAAAGGCTCTTTTCAGGCGGAGATACAAGTCAAGCACCATCATTATGAAAACCCTGCCTGGTTTCTGTGGTTACTGACAACCCCCTTTTGTGTAGATCTCATTA	FALSE	1.24682	1.2339	1.19221	1.36742	1.35729	1.19491	0.890018	0.785544	0.790664	1.14929	1.27427	0.680159	1.12208	1.1982	1.30139	1.28018	1.2309	1.23851	0.4753	0.420541	0.365663
RFXrandMutant_.If.95172522_mm_chr18:98578602$RFX5_RFX5at24^scrCREB5_scrCREB5at-43^scrCREB5_scrCREB5at-12^scrRFX5_scrRFX5at-2^CREB5_CREB5at5_1	138	120	29	42	68	29	243	183	328	325	327	189	300	324	87	204	106	93	66	48	263	503	185	289	211	417	CCTTCCACTCCCCCCACCCCAAACCCTATAATTAAAAAGGCTCTTTTCAGGCGGAGATACAATTCAAGCACCATCATTATGAAAACCCTGCCTCCAAAGACACCAATGAGACAACCCCCTTTTGTGTAGATCTCATTA	FALSE	0.763204	0.814796	0.941149	0.910216	1.07786	1.00242	0.504137	0.440978	0.410958	0.98199	0.975584	0.433349	0.920651	1.12812	0.919426	0.967802	1.10594	0.811621	0.241748	0.248664	0.24946
RFXrandMutant_.i1.1067132688_mm_chr18:98578602$RFX5_RFX5at24^scrCREB5_scrCREB5at-43^scrCREB5_scrCREB5at-12^scrRFX5_scrRFX5at-2^CREB5_CREB5at5_1	409	347	130	163	376	89	774	442	776	747	1144	685	775	917	319	968	489	539	350	200	575	1240	553	851	495	1073	CCTTCCACTCCCCCCACCCCAAACCCTATAATTAAAAAGGCTCTTTTCAGGCGGAGATACAATTCAAGCACCATCATTATGAAAACCCTGCCTGGATTCTGTGGTTAGTGACAACCCCCTTTTGTGTAGATCTCATTA	FALSE	0.943398	1.04341	0.859042	0.776768	0.901	0.81407	0.61426	0.765529	0.395964	0.913727	0.885683	0.609886	0.957861	0.935089	0.835903	0.747608	0.963302	0.857201	0.495044	0.465922	0.367254
RFXrandMutant_.i1.603201255_mm_chr18:98578602$CREB5_CREB5at5^scrCREB5_scrCREB5at-43^scrCREB5_scrCREB5at-12^scrRFX5_scrRFX5at-2^RFX5_RFX5at24_1	202	126	65	58	111	44	305	208	336	341	379	193	284	410	111	424	131	168	86	61	233	492	233	303	201	383	CCTTCCACTCCCCCCACCCCAAACCCTATAATTAAAAAGGCTCTTTTCAGGCGGAGATACAATTCAAGCACCATCATTATGGACACCCTGCCTGGTTTCTGTGGTTACTGACAACCCCCTTTTGTGTAGATCTCATTA	FALSE	0.699026	0.657515	0.704071	0.817557	0.872545	0.831153	0.554669	0.573506	0.496774	1.14521	0.816132	0.773856	0.762783	0.849237	0.66733	0.67756	0.854853	0.807791	0.345104	0.256052	0.250525
RFXrandMutant_.If.1039320784_mm_chr18:98578602$CREB5_CREB5at5^scrCREB5_scrCREB5at-43^scrCREB5_scrCREB5at-12^scrRFX5_scrRFX5at-2^RFX5_RFX5at24_1	588	552	197	173	441	165	796	478	693	867	1046	634	817	917	443	1160	563	499	313	157	711	1176	635	893	440	1343	CCTTCCACTCCCCCCACCCCAAACCCTATAATTAAAAAGGCTCTTTTCAGGCGGAGATACAATTCAAGCACCATGTAATACTTTTGCCTGCCTGGTTTCTGTGGTTACTGACAACCCCCTTTTGTGTAGATCTCATTA	FALSE	0.862582	0.965722	0.905596	0.840035	0.80463	0.944845	0.633926	0.873052	0.713801	1.27732	1.36999	0.898669	1.00514	0.83119	1.04624	0.924434	0.913584	0.984308	0.458306	0.416667	0.288294
inducibleMutant_.ip.-121014312_mm_chr4:125780530$scrCREB5_scrCREB5at-57^scrRFX5_scrRFX5at-37^RFX5_RFX5at-9^scrRFX5_scrRFX5at-5_1	1973	2069	842	3589	6567	3124	2599	1058	1828	1903	3420	1843	2336	1845	1848	4823	2218	9137	6123	5132	1580	2663	1360	2755	1682	3839	CCTTCTGGCCGCAACCCTCAAGGTGTGGACGGAAGCCAGGATTTTCGAGGGCCCCCAGTGAGTCACCAGACTGATGCAATCCCTTTAAAGGGCTCATCTGCTGGTGCAAGAAGCTGATTCATGGAGGGCGTGGCTGCT	FALSE	1.40174	1.39528	1.28694	0.924119	1.0549	1.03075	4.02785	3.98176	4.13915	1.31267	1.57269	1.17639	1.54123	1.57923	1.48644	1.02103	1.02822	1.04778	4.17092	4.05119	4.68377
inducibleMutant_.If.990314339_mm_chr4:125780530$scrCREB5_scrCREB5at-57^scrRFX5_scrRFX5at-37^RFX5_RFX5at-9^scrRFX5_scrRFX5at-5_1	1788	1681	522	3777	6195	2644	2889	1474	2170	2501	4355	2369	3052	2251	1437	4588	1688	8868	5155	4282	2088	3483	1637	3521	2221	5665	CCTTCTGGCCGCAAGATGTGCCGTGTGGACGGAAGCCAGGATTTTCGAGGGCCCCCAGTGAGTCACCAGACTGATGCAATCCCTTTAAAGGGCTCATCTGCTGGTGCAAGAAGCTGATTCATGGAGGGCGTGGCTGCT	FALSE	1.46302	1.47001	1.37813	1.05526	1.0264	1.11032	3.81334	3.37916	3.15152	1.07017	1.1495	0.656099	1.61448	1.70919	1.79784	1.10594	1.10227	1.03371	3.31799	2.79555	3.20314
inducibleMutant_.i2.-298130848_mm_chr4:125780530$scrCREB5_scrCREB5at-57^scrRFX5_scrRFX5at-37^RFX5_RFX5at-9^scrRFX5_scrRFX5at-5_1	1612	1535	692	4333	7069	3580	2263	838	1191	1254	2258	1202	1697	1138	1372	4813	2214	9525	6640	5548	1209	1824	1106	2200	1280	2869	CCTTCTGGCCGCCTCTACACGGCGGTGGACGGAAGCCAGGATTTTCGAGGGCCCCCAGTGAGTCACCAGACTGATGCAATCCCTTTAAAGGGCTCATCTGCTGGTGCAAGAAGCTGATTCATGGAGGGCGTGGCTGCT	FALSE	1.50044	1.47535	1.51573	1.1867	1.1143	1.1012	5.58483	4.92253	5.44759	1.23173	1.34003	1.11037	1.99537	1.94843	1.801	1.26666	1.14181	1.38146	7.04932	7.12262	8.20918
inducibleMutant_.i2.2107424632_mm_chr4:125780530$RFX5_RFX5at-9^scrCREB5_scrCREB5at-57^scrRFX5_scrRFX5at-37^scrRFX5_scrRFX5at-5_1	1491	1251	510	1594	2612	908	2365	1091	1615	1774	2301	1277	1687	1500	1259	3656	1520	3402	2192	1446	1580	2209	1220	1692	1068	2363	CCTTCTGGCCGCTTCTACACGGCAGTGGACGGAAGCCAGGATTTTCGAGGGCCCCCAGTGACTCACCAGACTGTTGCAATCCCTTTAAAGGGCTCATCTGCTGGTGCAAGAAGCTGATTCATGGAGGGCGTGGCTGCT	FALSE	1.16001	1.18914	1.14316	1.17212	1.14634	1.18188	1.96591	1.74043	1.32209	1.09014	1.045	0.783043	1.16426	1.23338	1.12538	1.25586	1.04909	1.1561	1.91015	1.78387	1.62324
inducibleMutant_.i1.1761296649_mm_chr4:125780530$RFX5_RFX5at-9^scrCREB5_scrCREB5at-57^scrRFX5_scrRFX5at-37^scrRFX5_scrRFX5at-5_1	2015	1877	793	1193	1898	847	2654	1092	1524	1835	2200	1361	1737	2101	1751	4591	2931	2429	1585	1234	1547	2525	1160	1837	965	2328	CCTTCTGGCCGCTTCTACACGGCAGTGGACGGAAGCCAGGATTTTCGAGGGCCCCCAGTGAGACACCAGACTGAGGCAATCCCTTTAAAGGGCTCATCTGCTGGTGCAAGAAGCTGATTCATGGAGGGCGTGGCTGCT	FALSE	0.791835	0.904824	0.840341	0.837597	0.77231	0.872812	1.31113	1.12696	1.09898	1.31283	1.39718	1.08497	0.902455	0.795643	0.791558	0.87789	0.856142	0.784799	0.973702	0.920911	0.988996
inducible_.chr4:125780530_base_inducible_1	850	1023	375	2122	3409	1660	1527	676	1044	1079	1863	1108	1450	975	916	2626	1332	5621	3574	2678	926	1725	669	1767	1041	2709	CCTTCTGGCCGCTTCTACACGGCAGTGGACGGAAGCCAGGATTTTCGAGGGCCCCCAGTGAGTCACCAGACTGATGCAATCCCTTTAAAGGGCTCATCTGCTGGTGCAAGAAGCTGATTCATGGAGGGCGTGGCTGCT	FALSE	1.44493	1.58733	1.51163	1.11733	1.14006	1.10593	4.05333	3.51806	3.74348	0.96253	1.32351	0.891741	1.87057	1.84954	1.98486	1.13235	1.26036	0.975322	4.8555	4.4747	4.625
inducibleMutant_.i2.-912191944_mm_chr4:125780530$scrRFX5_scrRFX5at-5^scrCREB5_scrCREB5at-57^scrRFX5_scrRFX5at-37^RFX5_RFX5at-9_1	1693	1639	606	1181	1934	919	2438	1028	1458	1738	2246	1197	1674	1632	1544	4601	2208	2605	1573	1164	1291	2380	1188	1646	998	2289	CCTTCTGGCCGCTTCTACACGGCAGTGGACGGAAGCCAGGATTTTCGAGGGCCCCCAGTGAGTCACCTGACTGATCCAATCCCTTTAAAGGGCTCATCTGCTGGTGCAAGAAGCTGATTCATGGAGGGCGTGGCTGCT	FALSE	1.04071	1.02449	1.0426	1.01511	0.951196	1.06424	1.41293	1.25008	1.29804	1.20076	1.32811	0.902579	1.041	1.05932	1.00196	0.943152	1.03888	1.03472	1.34435	1.17658	1.20099
inducibleMutant_.ip.840265759_mm_chr4:125780530$scrRFX5_scrRFX5at-5^scrCREB5_scrCREB5at-57^scrRFX5_scrRFX5at-37^RFX5_RFX5at-9_1	1636	1421	609	896	1439	570	2086	967	1540	1718	2063	1216	1496	1618	1594	3840	1824	1659	1069	752	1426	2253	1077	1527	837	2242	CCTTCTGGCCGCTTCTACACGGCAGTGGACGGAAGCCAGGATTTTCGAGGGCCCCCAGTGAGTCCCGAGAGTGATGCTCCCCCTTTAAAGGGCTCATCTGCTGGTGCAAGAAGCTGATTCATGGAGGGCGTGGCTGCT	FALSE	0.964182	1.04975	0.939799	0.963134	1.01339	1.0611	1.25285	1.08708	0.940951	1.35614	1.34577	1.06011	0.974098	0.896115	0.98988	1.05079	0.991957	0.946158	0.86356	0.806517	0.782609
inducibleMutant_.i1.-116171114_mm_chr4:125780530$scrRFX5_scrRFX5at-5^scrCREB5_scrCREB5at-57^scrRFX5_scrRFX5at-37^RFX5_RFX5at-9_1	1582	1282	504	746	1406	454	1807	654	824	879	1398	832	1060	1111	1224	3376	1851	1708	953	656	882	1396	726	1179	689	1461	CCTTCTGGCCGCTTCTACACGGCAGTGGACGGAAGCCAGGATTTTCGAGGGCCCCCAGTGAGTCGCCAGACTGAAGCAATCCCTTTAAAGGGCTCATCTGCTGGTGCAAGAAGCTGATTCATGGAGGGCGTGGCTGCT	FALSE	0.951549	1.04602	0.969781	0.948642	0.78967	0.790652	1.20417	1.22615	0.865175	1.51385	1.40159	1.01279	1.09532	1.07429	0.939424	0.946521	0.895121	0.928858	1.29479	1.04711	0.994249
inducibleMutant_.If.621341976_mm_chr4:125780530$scrRFX5_scrRFX5at-5^scrCREB5_scrCREB5at-57^scrRFX5_scrRFX5at-37^RFX5_RFX5at-9_1	3121	2803	1227	1904	3308	1293	4108	1631	2551	2691	3671	1904	2626	2986	2656	7221	4111	4099	2619	1921	2396	4000	1841	2469	1606	4046	CCTTCTGGCCGCTTCTACACGGCAGTGGACGGAAGCCAGGATTTTCGAGGGCCCCCAGTGAGTCTGGTCTGACTACGTTACCCTTTAAAGGGCTCATCTGCTGGTGCAAGAAGCTGATTCATGGAGGGCGTGGCTGCT	FALSE	0.929678	0.890655	0.893896	0.880243	0.909606	0.900606	1.35189	1.26897	1.08386	1.3137	1.34798	1.08458	0.853441	0.931693	0.96797	0.956693	0.95429	0.876376	1.15615	1.07068	1.08329
inducibleMutant_.ip.2121838189_mm_chr4:125780530$RFX5_RFX5at-9^scrCREB5_scrCREB5at-57^scrRFX5_scrRFX5at-37^scrRFX5_scrRFX5at-5_1	2776	2918	1292	1135	1892	1017	1600	1188	2019	1995	2149	1212	1590	1549	869	2667	1422	1394	787	483	1099	2077	1045	1432	795	1912	CCTTCTGGCCGCTTCTACACGGCAGTGGACGGAAGCCAGGATTTTCGAGGGCCCCCAGTGCGTTGCCATGGCAACGCAATCCCTTTAAAGGGCTCATCTGCTGGTGCAAGAAGCTGATTCATGGAGGGCGTGGCTGCT	FALSE	1.04912	1.09291	1.04334	1.23596	1.38777	1.28707	2.0691	1.86344	2.18881	3.00009	3.60292	2.93217	0.954188	0.889063	0.881784	0.845906	0.955202	0.95894	0.757942	0.620208	0.525051
inducibleMutant_.If.-2023112433_mm_chr4:125780530$RFX5_RFX5at-9^scrCREB5_scrCREB5at-57^scrRFX5_scrRFX5at-37^scrRFX5_scrRFX5at-5_1	2765	2301	1176	1352	2570	1151	3141	1405	1916	2099	3028	1499	2151	2294	2315	5754	3774	3241	1867	1581	1816	2916	1531	2201	1282	3144	CCTTCTGGCCGCTTCTACACGGCAGTGGACGGAAGCCAGGATTTTCGAGGGCCCCCAGTGTCAGTGGTCTGACTACCAATCCCTTTAAAGGGCTCATCTGCTGGTGCAAGAAGCTGATTCATGGAGGGCGTGGCTGCT	FALSE	0.998161	0.912726	0.953079	0.98701	0.889272	0.914386	1.25549	1.28938	1.26187	1.52216	1.44723	1.35952	0.990305	0.968081	0.979072	0.943839	0.905533	0.948655	1.1899	0.993494	1.1605
inducibleMutant_.i2.-2000424855_mm_chr4:125780530$scrRFX5_scrRFX5at-37^scrCREB5_scrCREB5at-57^RFX5_RFX5at-9^scrRFX5_scrRFX5at-5_1	1041	883	401	1445	2781	1206	1392	519	769	797	1577	811	1154	1063	900	2260	1130	4612	2281	2135	679	920	494	1485	789	1882	CCTTCTGGCCGCTTCTACACGGCAGTGGACGGAAGTCAGGATTCTCGAGGGCCCCCAGTGAGTCACCAGACTGATGCAATCCCTTTAAAGGGCTCATCTGCTGGTGCAAGAAGCTGATTCATGGAGGGCGTGGCTGCT	FALSE	1.12185	1.06566	1.10345	0.786815	0.770239	0.749266	3.02785	3.1483	2.98342	1.29314	1.25317	1.04605	1.4419	1.28576	1.26477	0.761574	0.616545	0.660572	3.6541	2.61943	3.38197
inducibleMutant_.ip.-520859950_mm_chr4:125780530$scrRFX5_scrRFX5at-37^scrCREB5_scrCREB5at-57^RFX5_RFX5at-9^scrRFX5_scrRFX5at-5_1	1026	929	262	1579	2440	836	1891	1113	1480	1588	2830	1430	1935	1756	692	2559	760	3129	1870	1270	1469	2176	1079	2278	1359	3259	CCTTCTGGCCGCTTCTACACGGCAGTGGACGGCCGAGAGTGATGCTCCGGGCCCCCAGTGAGTCACCAGACTGATGCAATCCCTTTAAAGGGCTCATCTGCTGGTGCAAGAAGCTGATTCATGGAGGGCGTGGCTGCT	FALSE	1.21871	1.13748	1.12005	1.02143	0.897366	0.903726	2.43555	2.03335	1.52237	0.938189	0.970541	0.503102	1.33897	1.34064	1.32582	0.997408	0.882764	0.873421	1.50074	1.29996	1.21782
inducibleMutant_.i1.-1567921514_mm_chr4:125780530$scrRFX5_scrRFX5at-37^scrCREB5_scrCREB5at-57^RFX5_RFX5at-9^scrRFX5_scrRFX5at-5_1	864	537	272	1684	2577	1217	1127	439	743	798	1326	678	970	801	599	1834	728	3997	2282	1957	773	1178	603	1149	627	1706	CCTTCTGGCCGCTTCTACACGGCAGTGGACGGGAGCCAGGATATTCGAGGGCCCCCAGTGAGTCACCAGACTGATGCAATCCCTTTAAAGGGCTCATCTGCTGGTGCAAGAAGCTGATTCATGGAGGGCGTGGCTGCT	FALSE	1.25184	1.1823	1.2309	0.883224	0.987618	0.995591	4.35837	3.60334	3.71854	1.32564	0.941326	0.876378	1.48057	1.35598	1.5215	1.1506	1.04767	1.07007	4.20268	3.47774	4.11399
inducibleMutant_.If.1627115464_mm_chr4:125780530$scrRFX5_scrRFX5at-37^scrCREB5_scrCREB5at-57^RFX5_RFX5at-9^scrRFX5_scrRFX5at-5_1	2682	2334	740	3598	5615	2314	3828	1591	2227	2251	4440	2218	3028	2818	2034	5685	2062	8428	4878	3582	1843	3067	1591	3638	2137	5092	CCTTCTGGCCGCTTCTACACGGCAGTGGACGGTTCGGTCCTAAAAGCTGGGCCCCCAGTGAGTCACCAGACTGATGCAATCCCTTTAAAGGGCTCATCTGCTGGTGCAAGAAGCTGATTCATGGAGGGCGTGGCTGCT	FALSE	1.19146	1.09939	1.09219	0.909846	0.841418	0.798262	2.74154	2.31149	2.0816	1.21149	1.20453	0.70195	1.33249	1.31365	1.29084	0.779758	0.775324	0.80252	2.51888	2.11308	2.14038
Synthetic	741	777	386	565	963	411	1352	1021	1392	1718	2035	1162	1506	1305	999	1893	1519	1473	841	718	1378	2164	1122	1384	865	2088	CGAAGCCATGGCCCCGTTATTTTAAGACGAAGCCATGGCCCCGTTATTTTAAGACGAAGCCATGGCCCCGTTATTTTAAGACGAAGCCATGGCCCCGTTATTTTAAGACGAAGCCATGGCCCCGTTATTTTAAGACGA	FALSE	1.17921	1.24373	1.173	1.26082	1.13569	1.3156	1.21893	1.12244	1.04682	0.947711	1.13536	1.03671	1.09463	1.14821	1.143	1.25897	1.18129	1.22211	0.950642	0.786683	0.926444
Synthetic	542	588	297	388	619	293	835	603	800	944	1013	583	946	872	734	1544	1162	863	624	498	697	1127	561	879	468	1111	CGAAGCTAGGCCCCGTTATTTTAAGACGAAGCTAGGCCCCGTTATTTTAAGACGAAGCTAGGCCCCGTTATTTTAAGACGAAGCTAGGCCCCGTTATTTTAAGACGAAGCTAGGCCCCGTTATTTTAAGACGAAGCTA	FALSE	0.878478	0.933865	1.1027	1.1144	0.976801	1.08185	1.35535	1.1682	1.20834	1.1224	1.39117	1.29157	1.04043	0.929707	0.910171	0.952998	0.920699	0.914478	0.833526	0.873539	0.961653
inducibleMutant_.i1.222400911_mm_chr1:55109510$RFX5_RFX5at-69^RFX5_RFX5at43^CREB5_CREB5at49_1	24791	14375	13210	24850	53413	28882	47603	20019	32067	34098	52108	28324	38628	28642	29800	38741	56937	52632	43580	35305	27125	45836	23228	38464	22876	56644	CGACACGAAGATTAGATAAGTGGCAGACTCCTGGCAGGAGCAGAGCGTGTCCCGGAGATCCGCGCCCCGATTGGCTGTCCCGAGGCGGCACTGGACACGTGCGTCAGCCTAGCGTCAGCGTGGCGTCATGGGGTTGGG	FALSE	1.37575	1.38129	1.37082	1.12636	1.19203	1.1897	1.52264	1.76818	2.08929	0.900521	0.596573	1.00766	1.3861	1.38355	1.41279	1.12913	1.14002	1.15275	1.54764	1.85737	2.07557
activeMutant_.i1.-19705504_mm_chr14:30781530$scrRFX5_scrRFX5at-68^RFX5_RFX5at-37^RFX5_RFX5at-19_1	8165	8863	5436	4649	8761	4782	8243	5947	9372	10347	7625	4270	5754	4074	8290	16854	16100	10524	8654	6014	8200	12454	7237	6032	3577	8323	CGAGACGTCATATCCGGTCTCCTGACTCAGGCAGTATCCACGCCAGCGGAAGTTACTTGTGTGACTGGGCGGAACCTCTAGTCAGGAGTGGTCTCCCAGCAGCCAATGGGCTCGACCCACCTCTAGCCTGACTTGGGT	FALSE	1.41533	1.46399	1.43559	2.35242	2.44931	2.53807	1.64505	1.67488	1.9977	1.71279	2.12415	2.39464	1.52821	1.52095	1.45943	2.39976	2.1777	2.52502	2.17563	2.59305	2.48569
inducibleMutant_.If.-1959042756_mm_chr9:102582476$scrRFX5_scrRFX5at-18_1	2825	33	259	1655	7320	57	534	2689	3698	3947	6174	3497	4613	3904	2994	153	3511	1306	737	2766	3504	5556	2692	4659	2742	6460	CGCTATCTGCGGCGCGCGCCGGCGGCGGGTCCCGGCCAACCGCCGAATTTACATTGTAGCGGACGCACAATCACGCGCCTCGCGTGCGTCAGCGCCGCGCGGCTCCAGGTCCTGCTCCCCCCCTTCAAGCCTTTGAAT	FALSE	1.1959	1.25117	1.20103	1.10999	1.00853	1.01034	9.03987	21.6015	0.36757	9.14769	0.122085	1.76119	1.23176	1.21667	1.18208	1.07011	1.01382	0.980149	0.281746	0.230447	1.19302
inducibleMutant_.ip.-226045362_mm_chr9:102582476$scrRFX5_scrRFX5at-18_1	3556	36	228	1831	6964	90	520	2103	3226	3288	5154	3078	3918	3990	2527	103	4177	1414	909	3104	3027	4998	2246	3899	2400	5526	CGCTATCTGCGGCGCGCGCCGGCGGCGGGTCCCGGCCAACCGCCGAATTTACCGAGAGTGATGCTCCCAATCACGCGCCTCGCGTGCGTCAGCGCCGCGCGGCTCCAGGTCCTGCTCCCCCCCTTCAAGCCTTTGAAT	FALSE	0.976809	1.07753	0.998099	0.849386	0.860843	0.823511	10.2705	21.1043	0.595999	11.8248	0.136769	1.59213	1.00861	1.04197	0.989381	0.904514	0.892347	0.800135	0.29847	0.278103	1.30995
inducibleMutant_.i1.1444442715_mm_chr9:102582476$scrRFX5_scrRFX5at-18_1	5777	92	899	10206	26055	522	996	3471	5428	5637	15154	8387	11501	4955	5124	159	8727	9315	6042	18136	4819	8212	3980	12109	7010	18540	CGCTATCTGCGGCGCGCGCCGGCGGCGGGTCCCGGCCAACCGCCGAATTTAGTAACATCGCATGCGTCAATCACGCGCCTCGCGTGCGTCAGCGCCGCGCGGCTCCAGGTCCTGCTCCCCCCCTTCAAGCCTTTGAAT	FALSE	2.31271	2.36426	2.35925	1.12888	1.16635	1.13688	29.8883	41.2236	1.80475	10.0295	0.182481	3.27753	2.52236	2.45071	2.67296	1.15955	1.18063	1.14174	1.5833	1.48851	6.16316
inducible_.chr9:102582476_base_inducible_1	6622	120	524	9107	31690	210	738	4923	7100	7547	19401	10938	15337	5357	5499	136	8451	6274	3881	18841	6605	10333	5756	15464	9383	23783	CGCTATCTGCGGCGCGCGCCGGCGGCGGGTCCCGGCCAACCGCCGAATTTAGTAACATCGCCTGCGTCAATCACGCGCCTCGCGTGCGTCAGCGCCGCGCGGCTCCAGGTCCTGCTCCCCCCCTTCAAGCCTTTGAAT	FALSE	2.73868	2.85199	2.91005	1.48097	1.41114	1.40787	35.9935	67.6676	0.979872	15.5155	0.321229	2.57823	2.97949	3.03415	3.17154	1.47003	1.37409	1.52731	0.986388	0.884375	5.92226
inducibleMutant_.ip.748823419_mm_chr15:79177960$CREB5_CREB5at-41^scrCREB5_scrCREB5at-15_1	271	108	155	425	866	414	430	251	416	444	632	337	418	340	209	526	388	721	645	465	306	677	307	454	308	661	CGCTCTGGGGCTTGCTGGCGGCTGGGGCAATGACGTCACCGCATGACTGGGTTTTTATGAATGAAAGGAATCCTGTGCGTGAGTAATTCCGGGAAGCTCGCCTTACAACTGCGCGCGGCTCCAGCCCCCTTCGCCGCC	FALSE	1.40565	1.38447	1.24962	1.18969	1.30271	1.30501	2.88288	3.17369	3.31542	1.08977	0.496187	1.30891	1.37822	1.56924	1.38883	1.07305	1.41847	1.28347	1.786	2.31577	2.30292
inducibleMutant_.If.-1252627019_mm_chr15:79177960$CREB5_CREB5at-41^scrCREB5_scrCREB5at-15_1	1958	1882	947	1486	2882	1309	3782	2009	2849	3113	4400	2338	3273	3735	2200	5066	4106	4531	3123	1863	2751	4445	2247	3172	1802	4794	CGCTCTGGGGCTTGCTGGCGGCTGGGGCCCACTGCAGTGAGCATGACTGGGTTTTTATGAATGAAAGGAATCCTGTGCGTGAGTAATTCCGGGAAGCTCGCCTTACAACTGCGCGCGGCTCCAGCCCCCTTCGCCGCC	FALSE	0.890841	0.874352	0.890712	0.866818	0.812146	0.832912	1.14605	1.20085	1.19186	0.895211	0.983078	0.909232	0.876566	0.835759	0.916923	0.878164	0.847796	0.855144	1.02171	1.02069	0.8399
inducibleMutant_.i2.-679743369_mm_chr15:79177960$CREB5_CREB5at-41^scrCREB5_scrCREB5at-15_1	3165	2139	1431	2136	4214	2392	5667	3190	4701	5106	7287	4050	5208	4580	3204	4925	6207	5692	4207	3085	4626	7541	3571	5364	3334	7514	CGCTCTGGGGCTTGCTGGCGGCTGGGGCGGGGCCGTCACTGCATGACTGGGTTTTTATGAATGAAAGGAATCCTGTGCGTGAGTAATTCCGGGAAGCTCGCCTTACAACTGCGCGCGGCTCCAGCCCCCTTCGCCGCC	FALSE	1.20315	1.23516	1.15581	1.12244	1.09284	1.1141	1.09939	1.17181	1.4535	0.965728	0.745671	0.916923	1.20883	1.26101	1.17201	1.20425	1.17293	1.10828	1.0467	1.1213	1.13421
inducibleMutant_.i1.1175365825_mm_chr15:79177960$CREB5_CREB5at-41^scrCREB5_scrCREB5at-15_1	1660	1137	893	1440	2588	1177	3825	1867	2911	3121	4177	2256	3155	3018	2064	3274	3684	2941	2280	1639	2698	4491	1980	3040	1785	4204	CGCTCTGGGGCTTGCTGGCGGCTGGGGCGGTGACGGCCCTGCATGACTGGGTTTTTATGAATGAAAGGAATCCTGTGCGTGAGTAATTCCGGGAAGCTCGCCTTACAACTGCGCGCGGCTCCAGCCCCCTTCGCCGCC	FALSE	1.04661	1.04412	1.06258	0.996928	1.02696	1.03344	1.09809	1.06622	1.05962	0.750431	0.587244	0.847747	1.03967	1.02456	0.995105	1.06586	1.06007	0.932551	0.82073	0.92221	0.914461
inducibleMutant_.ip.-262731020_mm_chr15:79177960$scrCREB5_scrCREB5at-15^CREB5_CREB5at-41_1	7444	6832	4221	5410	9639	5243	8045	4931	7272	7816	9618	5611	7193	5820	7235	15849	14975	9492	8260	5529	7041	10785	5937	7762	4391	10050	CGCTCTGGGGCTTGCTGGCGGCTGGGGCGGTGACGTCACTGCATGACTGGGTTTAACCCTCAAGGTGGAATCCTGTGCGTGAGTAATTCCGGGAAGCTCGCCTTACAACTGCGCGCGGCTCCAGCCCCCTTCGCCGCC	FALSE	1.24968	1.34663	1.25623	1.36537	1.33034	1.34206	1.96145	1.88808	2.24419	1.59998	1.67769	1.90518	1.37655	1.30695	1.23358	1.4424	1.3201	1.45001	1.3736	1.73249	1.59966
inducibleMutant_.If.1845887918_mm_chr15:79177960$scrCREB5_scrCREB5at-15^CREB5_CREB5at-41_1	4817	3768	2458	6662	12124	6743	8208	4845	7418	7667	13299	7140	9579	6851	4882	9671	9185	13413	9931	7861	6381	10970	5337	9513	5613	12723	CGCTCTGGGGCTTGCTGGCGGCTGGGGCGGTGACGTCACTGCATGACTGGGTTTAATACTTACTTTGGAATCCTGTGCGTGAGTAATTCCGGGAAGCTCGCCTTACAACTGCGCGCGGCTCCAGCCCCCTTCGCCGCC	FALSE	1.46792	1.45572	1.42118	1.13967	1.15283	1.11836	2.36741	2.32768	2.82893	1.01478	0.906908	1.0874	1.4332	1.41925	1.32666	1.11048	1.14068	1.10731	1.64891	1.76951	1.9321
inducibleMutant_.i2.-495067709_mm_chr15:79177960$scrCREB5_scrCREB5at-15^CREB5_CREB5at-41_1	95	145	60	314	407	202	297	161	274	281	407	243	301	219	213	347	389	610	443	328	277	492	192	341	172	438	CGCTCTGGGGCTTGCTGGCGGCTGGGGCGGTGACGTCACTGCATGACTGGGTTTCTATGAATGAAGGGAATCCTGTGCGTGAGTAATTCCGGGAAGCTCGCCTTACAACTGCGCGCGGCTCCAGCCCCCTTCGCCGCC	FALSE	1.40536	1.54987	1.39703	1.18473	1.33211	1.28225	3.08375	2.1595	2.34208	0.553097	0.964498	0.73357	1.60714	1.36051	1.42875	1.50803	1.60041	1.24619	2.34591	2.4693	2.52194
inducible_.chr15:79177960_base_inducible_1	2779	2199	1370	5417	10424	4719	6596	4176	6028	6585	11437	6524	7901	5550	3554	7046	6309	9929	9275	6080	5570	8869	4368	8064	5124	11585	CGCTCTGGGGCTTGCTGGCGGCTGGGGCGGTGACGTCACTGCATGACTGGGTTTTTATGAATGAAAGGAATCCTGTGCGTGAGTAATTCCGGGAAGCTCGCCTTACAACTGCGCGCGGCTCCAGCCCCCTTCGCCGCC	FALSE	1.55832	1.64192	1.44701	1.21257	1.15641	1.1857	2.39543	2.4904	2.46363	0.728521	0.658619	0.7542	1.49968	1.59931	1.49118	1.19657	1.13839	1.11871	1.50674	2.04002	1.84466
inducibleMutant_.i1.493526785_mm_chr15:79177960$scrCREB5_scrCREB5at-15^CREB5_CREB5at-41_1	3667	3113	1933	4083	8398	4405	5742	3013	4597	4657	7994	4414	5452	4151	3785	8005	6783	8452	6856	4963	4102	6505	3343	5665	3022	7593	CGCTCTGGGGCTTGCTGGCGGCTGGGGCGGTGACGTCACTGCATGACTGGGTTTTTATGGACGAAAGGAATCCTGTGCGTGAGTAATTCCGGGAAGCTCGCCTTACAACTGCGCGCGGCTCCAGCCCCCTTCGCCGCC	FALSE	1.4563	1.48529	1.33501	1.16973	1.17911	1.12115	2.07406	2.30477	2.64173	1.10429	1.07104	1.22241	1.40861	1.26113	1.30673	1.1782	1.11636	1.14475	1.71487	2.01619	2.01325
inducibleMutant_.ip.-1712137217_mm_chr8:10131055$scrCREB5_scrCREB5at-42^scrRFX5_scrRFX5at-41^scrCREB5_scrCREB5at-24^scrRFX5_scrRFX5at-17^RFX5_RFX5at-2^scrRFX5_scrRFX5at26^CREB5_CREB5at31_1	3649	3470	1616	4822	7739	3770	7367	4716	6810	7669	11301	5998	8127	6793	2845	7269	4397	8463	5155	3898	5714	9265	4762	8043	4866	12031	CGCTGTTCTCCCTGGATGACTAATATAAACCCTCAAGGTTTTGTTTTGTGCTCTGAAGAACTTGCTCCATCACCATAGTAACCTCTTCATGTTGGCGGAAGCTGATGTCATTTAAAGTATTATTCATTCGTGGTGAAT	FALSE	1.25804	1.23332	1.21605	1.1188	1.06738	1.1282	1.90916	1.65542	1.76221	0.856481	0.930526	0.796521	1.22208	1.24087	1.26522	1.00289	0.971615	0.996448	1.04927	0.926363	0.966241
inducibleMutant_.If.595789591_mm_chr8:10131055$scrCREB5_scrCREB5at-42^scrRFX5_scrRFX5at-41^scrCREB5_scrCREB5at-24^scrRFX5_scrRFX5at-17^RFX5_RFX5at-2^scrRFX5_scrRFX5at26^CREB5_CREB5at31_1	5585	5361	3062	9902	15770	8925	9031	5844	8328	8759	13846	7354	10350	7404	4112	10904	7811	16187	10004	8977	6438	11041	5762	9864	5423	13872	CGCTGTTCTCCCTGGATGACTAATATAAGTTCGTACCATTTTGTTTTGTGCTCTGAAGAACTTGCTCCATCACCATAGTAACCTCTTCATGTTGGCGGAAGCTGATGTCATTTAAAGTATTATTCATTCGTGGTGAAT	FALSE	1.41415	1.38736	1.42088	1.27199	1.19759	1.18222	3.1981	2.75176	3.40313	1.06935	1.17273	1.23116	1.37508	1.26879	1.33844	1.03672	1.06231	1.1062	1.8413	1.64938	2.0416
inducibleMutant_.i2.-283027777_mm_chr8:10131055$scrCREB5_scrCREB5at-42^scrRFX5_scrRFX5at-41^scrCREB5_scrCREB5at-24^scrRFX5_scrRFX5at-17^RFX5_RFX5at-2^scrRFX5_scrRFX5at26^CREB5_CREB5at31_1	3900	4134	2270	7610	12906	6510	7875	3607	5808	6112	9637	5416	7128	4922	3450	8144	6072	12629	8322	6893	4268	7672	3840	7085	3966	9442	CGCTGTTCTCCCTGGATGACTAATATACCAAGCATGGTGTTTGTTTTGTGCTCTGAAGAACTTGCTCCATCACCATAGTAACCTCTTCATGTTGGCGGAAGCTGATGTCATTTAAAGTATTATTCATTCGTGGTGAAT	FALSE	1.4806	1.53698	1.472	1.18098	1.25637	1.24094	2.81864	2.58259	2.84667	0.856344	1.03707	1.0467	1.48573	1.39582	1.3704	1.03385	1.11039	1.10896	2.16099	2.06396	2.35815
inducibleMutant_.If.79030423_mm_chr8:10131055$scrCREB5_scrCREB5at-24^scrCREB5_scrCREB5at-42^scrRFX5_scrRFX5at-41^scrRFX5_scrRFX5at-17^RFX5_RFX5at-2^scrRFX5_scrRFX5at26^CREB5_CREB5at31_1	1156	964	469	1664	2941	1393	1894	902	1270	1342	2503	1373	1625	1477	1081	2369	1648	2452	1643	1493	1165	1751	1046	1645	942	2407	CGCTGTTCTCCCTGGATGACTAATATATCAAGCATGGTATTTGTTAACACGAGACTTGAACTTGCTCCATCACCATAGTAACCTCTTCATGTTGGCGGAAGCTGATGTCATTTAAAGTATTATTCATTCGTGGTGAAT	FALSE	1.2815	1.29844	1.11829	0.984158	0.915494	0.907993	2.56259	2.44698	2.53266	1.05539	1.00551	0.899165	1.14955	1.10481	1.16418	0.940418	0.844532	1.00665	1.39819	1.35791	1.7021
inducibleMutant_.ip.1295107487_mm_chr8:10131055$scrCREB5_scrCREB5at-24^scrCREB5_scrCREB5at-42^scrRFX5_scrRFX5at-41^scrRFX5_scrRFX5at-17^RFX5_RFX5at-2^scrRFX5_scrRFX5at26^CREB5_CREB5at31_1	3827	3643	1776	3901	7604	3431	6917	3545	5164	5990	8961	4645	6332	5751	3651	9351	6219	8091	5337	4086	4559	7245	3827	5724	3570	9008	CGCTGTTCTCCCTGGATGACTAATATATCAAGCATGGTATTTGTTAACCCTCAAGGTGAACTTGCTCCATCACCATAGTAACCTCTTCATGTTGGCGGAAGCTGATGTCATTTAAAGTATTATTCATTCGTGGTGAAT	FALSE	1.17829	1.12817	1.11913	0.993371	0.956038	1.04086	1.64499	1.73236	1.70808	0.956698	1.04047	0.932334	1.0273	1.07533	1.11895	0.945153	0.89744	0.945892	1.18491	1.13284	1.19636
inducibleMutant_.i2.821931775_mm_chr8:10131055$scrCREB5_scrCREB5at-24^scrCREB5_scrCREB5at-42^scrRFX5_scrRFX5at-41^scrRFX5_scrRFX5at-17^RFX5_RFX5at-2^scrRFX5_scrRFX5at26^CREB5_CREB5at31_1	1125	1220	614	1696	2434	1210	1426	471	749	809	1565	734	966	797	780	1840	1215	2430	1705	1322	546	1125	510	877	535	1414	CGCTGTTCTCCCTGGATGACTAATATATCAAGCATGGTATTTGTTCTGTGCTCTGAGGAACTTGCTCCATCACCATAGTAACCTCTTCATGTTGGCGGAAGCTGATGTCATTTAAAGTATTATTCATTCGTGGTGAAT	FALSE	1.48489	1.28638	1.23197	0.95236	1.00059	1.01438	3.46906	2.68977	2.92195	1.36417	1.69017	1.56349	1.13575	1.16282	1.26741	0.816789	1.00555	0.909575	2.56787	2.61144	2.79305
inducibleMutant_.ip.138582767_mm_chr8:10131055$scrRFX5_scrRFX5at-17^scrCREB5_scrCREB5at-42^scrRFX5_scrRFX5at-41^scrCREB5_scrCREB5at-24^RFX5_RFX5at-2^scrRFX5_scrRFX5at26^CREB5_CREB5at31_1	5563	5793	3098	10873	16991	9787	8775	4742	7135	7847	13304	6866	9098	7152	4435	12359	8416	19162	11949	10012	5495	9964	4887	9875	5779	13649	CGCTGTTCTCCCTGGATGACTAATATATCAAGCATGGTATTTGTTTTGTGCTCCGAGAGTGATGCTCCATCACCATAGTAACCTCTTCATGTTGGCGGAAGCTGATGTCATTTAAAGTATTATTCATTCGTGGTGAAT	FALSE	1.40667	1.34094	1.29301	1.0685	1.06218	1.09645	3.61416	3.05131	3.84069	1.09622	1.30421	1.28198	1.42512	1.39972	1.36332	0.916043	0.992468	0.971273	2.25651	2.03947	2.35721
inducibleMutant_.i1.108581959_mm_chr8:10131055$RFX5_RFX5at-2^scrCREB5_scrCREB5at-42^scrRFX5_scrRFX5at-41^scrCREB5_scrCREB5at-24^scrRFX5_scrRFX5at-17^scrRFX5_scrRFX5at26^CREB5_CREB5at31_1	2736	2553	1137	2675	4168	2021	6408	2743	4615	4754	7218	3596	5175	4569	2499	7627	4242	6877	3797	3052	4089	6925	3401	5457	3111	7696	CGCTGTTCTCCCTGGATGACTAATATATCAAGCATGGTATTTGTTTTGTGCTCTGAAGAACTTGCTCCAACACCATAGTAAGCTCTTCATGTTGGCGGAAGCTGATGTCATTTAAAGTATTATTCATTCGTGGTGAAT	FALSE	1.19463	1.09934	1.15125	0.967483	1.07543	1.0398	1.21761	1.02499	1.08605	0.738292	0.787079	0.644295	1.23275	1.17949	1.20329	1.06702	1.07971	1.05806	1.26766	1.01446	1.12478
inducibleMutant_.ip.-183020261_mm_chr8:10131055$scrRFX5_scrRFX5at26^scrCREB5_scrCREB5at-42^scrRFX5_scrRFX5at-41^scrCREB5_scrCREB5at-24^scrRFX5_scrRFX5at-17^RFX5_RFX5at-2^CREB5_CREB5at31_1	9206	8432	4573	8375	14403	7309	16062	6587	9845	10599	15355	8553	11476	9663	7869	19439	13901	13764	9765	7334	8419	13468	6729	10770	6247	15505	CGCTGTTCTCCCTGGATGACTAATATATCAAGCATGGTATTTGTTTTGTGCTCTGAAGAACTTGCTCCATCACCATAGTAACCTCTTCATGTTGGCCGAGAGTGATGCTCCTTAAAGTATTATTCATTCGTGGTGAAT	FALSE	1.20164	1.23634	1.20715	1.09854	1.08477	1.09613	1.52087	1.41308	1.56698	0.991073	1.0371	1.03383	1.15039	1.11989	1.14627	1.03878	0.992891	0.989841	1.19966	1.2336	1.27801
inducibleMutant_.ip.-1033900567_mm_chr8:10131055$CREB5_CREB5at31^scrCREB5_scrCREB5at-42^scrRFX5_scrRFX5at-41^scrCREB5_scrCREB5at-24^scrRFX5_scrRFX5at-17^RFX5_RFX5at-2^scrRFX5_scrRFX5at26_1	638	714	249	1389	1890	814	974	503	813	899	1294	743	878	594	377	1367	518	1821	925	673	596	781	458	1125	573	1405	CGCTGTTCTCCCTGGATGACTAATATATCAAGCATGGTATTTGTTTTGTGCTCTGAAGAACTTGCTCCATCACCATAGTAACCTCTTCATGTTGGCGGAAAATGACGTCACCTAAAGTATTATTCATTCGTGGTGAAT	FALSE	1.64735	1.74717	1.50242	1.36465	1.45726	1.51246	4.15957	3.05786	2.87787	1.13265	1.4482	0.928297	1.95483	1.67103	1.68972	1.19629	0.936645	1.09599	2.58195	1.90094	1.90781
inducibleMutant_.If.1575001063_mm_chr8:10131055$CREB5_CREB5at31^scrCREB5_scrCREB5at-42^scrRFX5_scrRFX5at-41^scrCREB5_scrCREB5at-24^scrRFX5_scrRFX5at-17^RFX5_RFX5at-2^scrRFX5_scrRFX5at26_1	2999	3517	1693	3548	6342	2856	5333	3203	4823	5131	7467	3890	5122	4164	2397	6650	4659	5347	3392	2690	3945	6598	3399	4705	2929	7186	CGCTGTTCTCCCTGGATGACTAATATATCAAGCATGGTATTTGTTTTGTGCTCTGAAGAACTTGCTCCATCACCATAGTAACCTCTTCATGTTGGCGGAACGACTACAGTAATAAAGTATTATTCATTCGTGGTGAAT	FALSE	1.35604	1.30488	1.25029	1.23961	1.23322	1.23141	1.94052	1.874	1.84414	0.972387	1.30284	1.15274	1.16625	1.2185	1.23283	1.12957	1.12879	1.16029	1.08149	0.994396	1.08779
inducibleMutant_.i2.-331349439_mm_chr8:10131055$CREB5_CREB5at31^scrCREB5_scrCREB5at-42^scrRFX5_scrRFX5at-41^scrCREB5_scrCREB5at-24^scrRFX5_scrRFX5at-17^RFX5_RFX5at-2^scrRFX5_scrRFX5at26_1	952	918	372	1028	1623	899	2147	834	1459	1448	1939	1132	1622	1395	684	1878	1035	1511	932	759	1160	1744	1053	1385	833	2131	CGCTGTTCTCCCTGGATGACTAATATATCAAGCATGGTATTTGTTTTGTGCTCTGAAGAACTTGCTCCATCACCATAGTAACCTCTTCATGTTGGCGGAAGCGGCTGTCATTTAAAGTATTATTCATTCGTGGTGAAT	FALSE	1.05109	1.13346	1.18184	0.963453	1.11356	1.0373	1.39658	1.19125	1.4419	0.766724	0.844696	0.629155	1.02475	1.0344	1.09128	0.991424	0.8906	1.07295	0.912252	0.81556	0.916163
inducibleMutant_.i1.-1677462389_mm_chr8:10131055$CREB5_CREB5at31^scrCREB5_scrCREB5at-42^scrRFX5_scrRFX5at-41^scrCREB5_scrCREB5at-24^scrRFX5_scrRFX5at-17^RFX5_RFX5at-2^scrRFX5_scrRFX5at26_1	3524	3439	1890	4877	8363	3821	7320	3714	5382	5694	8963	4925	6359	5047	2890	7716	5505	8239	5237	4028	4782	7792	4151	6124	3557	8472	CGCTGTTCTCCCTGGATGACTAATATATCAAGCATGGTATTTGTTTTGTGCTCTGAAGAACTTGCTCCATCACCATAGTAACCTCTTCATGTTGGCGGAAGCTGATGGCCTTTAAAGTATTATTCATTCGTGGTGAAT	FALSE	1.34295	1.36303	1.28067	1.1859	1.13538	1.12744	1.94333	1.80039	1.79751	0.832452	0.928135	0.937556	1.2524	1.22086	1.19916	1.12967	1.09983	1.16909	1.37488	1.26667	1.34388
inducible_.chr8:10131055_base_inducible_1	415	356	159	560	836	461	636	367	461	590	826	490	600	363	236	628	383	859	619	482	458	623	351	603	360	786	CGCTGTTCTCCCTGGATGACTAATATATCAAGCATGGTATTTGTTTTGTGCTCTGAAGAACTTGCTCCATCACCATAGTAACCTCTTCATGTTGGCGGAAGCTGATGTCATTTAAAGTATTATTCATTCGTGGTGAAT	FALSE	1.72073	1.88548	1.68007	1.62929	1.35216	1.62426	2.56825	2.0714	2.49603	1.1283	1.10582	0.907792	1.71456	1.71796	1.54683	1.5043	1.22262	1.37444	1.99302	2.0816	2.23587
inducibleMutant_.i2.-1347536921_mm_chr8:10131055$scrRFX5_scrRFX5at26^scrCREB5_scrCREB5at-42^scrRFX5_scrRFX5at-41^scrCREB5_scrCREB5at-24^scrRFX5_scrRFX5at-17^RFX5_RFX5at-2^CREB5_CREB5at31_1	1072	1024	510	1447	2299	1142	1743	976	1491	1507	2127	1094	1512	1176	817	1917	1309	1833	1255	964	1351	2278	1107	1482	849	2251	CGCTGTTCTCCCTGGATGACTAATATATCAAGCATGGTATTTGTTTTGTGCTCTGAAGAACTTGCTCCATCACCATAGTAACCTCTTCATGTTGGCGGTAGCTGATCTCATTTAAAGTATTATTCATTCGTGGTGAAT	FALSE	1.36772	1.2994	1.30685	1.33746	1.3499	1.28061	2.42146	2.07853	2.25619	1.06349	1.16063	1.06248	1.30072	1.2506	1.36739	1.36969	1.37993	1.33803	1.31274	1.30272	1.38031
inducibleMutant_.If.1176522526_mm_chr8:10131055$scrRFX5_scrRFX5at26^scrCREB5_scrCREB5at-42^scrRFX5_scrRFX5at-41^scrCREB5_scrCREB5at-24^scrRFX5_scrRFX5at-17^RFX5_RFX5at-2^CREB5_CREB5at31_1	2999	2941	1426	3159	4902	2286	6619	2777	4685	5137	6865	3969	4997	5017	2764	7759	4828	5360	3259	2448	3932	6572	3239	5121	2780	7167	CGCTGTTCTCCCTGGATGACTAATATATCAAGCATGGTATTTGTTTTGTGCTCTGAAGAACTTGCTCCATCACCATAGTAACCTCTTCATGTTGGGCCTTCGACTACAGTATTAAAGTATTATTCATTCGTGGTGAAT	FALSE	1.03475	1.10502	1.01239	0.892011	0.994255	1.02324	1.39208	1.16707	1.1893	0.783463	0.877794	0.782301	1.05354	0.959881	1.02051	0.934426	0.933176	0.917685	0.899799	0.792966	0.821623
inducibleMutant_.i1.-1757864505_mm_chr8:10131055$scrRFX5_scrRFX5at26^scrCREB5_scrCREB5at-42^scrRFX5_scrRFX5at-41^scrCREB5_scrCREB5at-24^scrRFX5_scrRFX5at-17^RFX5_RFX5at-2^CREB5_CREB5at31_1	3953	3802	1974	4727	7845	3876	6290	3427	4963	5638	7566	4249	5499	5323	3197	8218	5165	7490	4633	3203	4135	7117	3683	5572	3047	7505	CGCTGTTCTCCCTGGATGACTAATATATCAAGCATGGTATTTGTTTTGTGCTCTGAAGAACTTGCTCCATCACCATAGTAACCTCTTCATGTTGGGGGAAGCTGAAGTCATTTAAAGTATTATTCATTCGTGGTGAAT	FALSE	1.07485	1.11497	1.05005	1.03752	0.992705	1.05847	2.192	1.96543	2.12197	1.0867	1.19413	1.13958	1.08043	0.991592	1.00721	0.926179	0.952469	0.983494	1.18509	1.06248	1.01322
inducibleMutant_.i2.1083166561_mm_chr8:10131055$RFX5_RFX5at-2^scrCREB5_scrCREB5at-42^scrRFX5_scrRFX5at-41^scrCREB5_scrCREB5at-24^scrRFX5_scrRFX5at-17^scrRFX5_scrRFX5at26^CREB5_CREB5at31_1	4235	4093	1912	3210	5326	2691	8956	3392	5253	5379	7943	4082	5453	5549	4421	10839	7490	8819	5845	4189	4454	7917	3945	5856	3525	8747	CGCTGTTCTCCCTGGATGACTAATATATCAAGCATGGTATTTGTTTTGTGCTCTGAAGAACTTGCTCCCTCACCATAGTATCCTCTTCATGTTGGCGGAAGCTGATGTCATTTAAAGTATTATTCATTCGTGGTGAAT	FALSE	1.08245	1.02752	0.998856	0.985099	1.00792	0.968718	1.04543	0.937134	1.03468	0.817662	0.902854	0.775212	1.08925	1.10043	1.12608	0.956998	1.01638	1.01055	1.33853	1.28583	1.27116
inducibleMutant_.ip.1348381516_mm_chr8:10131055$RFX5_RFX5at-2^scrCREB5_scrCREB5at-42^scrRFX5_scrRFX5at-41^scrCREB5_scrCREB5at-24^scrRFX5_scrRFX5at-17^scrRFX5_scrRFX5at26^CREB5_CREB5at31_1	7271	7737	4121	11390	18737	9952	8403	5350	8051	8739	13169	7413	9533	6863	4655	11990	9301	14787	9458	7715	5437	9340	4718	8283	5016	12181	CGCTGTTCTCCCTGGATGACTAATATATCAAGCATGGTATTTGTTTTGTGCTCTGAAGAACTTGCTCCGTTGCCATGGCAACGTCTTCATGTTGGCGGAAGCTGATGTCATTTAAAGTATTATTCATTCGTGGTGAAT	FALSE	1.45103	1.50873	1.41188	1.25626	1.24902	1.2725	3.95362	3.51383	4.07833	1.49622	1.81898	1.7808	1.24571	1.26608	1.26793	0.944541	0.96949	0.977171	1.81464	1.68228	1.8929
inducibleMutant_.If.379538169_mm_chr8:10131055$RFX5_RFX5at-2^scrCREB5_scrCREB5at-42^scrRFX5_scrRFX5at-41^scrCREB5_scrCREB5at-24^scrRFX5_scrRFX5at-17^scrRFX5_scrRFX5at26^CREB5_CREB5at31_1	5253	4975	2428	4436	6604	3361	11535	5730	8577	9269	12170	6931	9330	9332	5510	14673	9588	11107	6941	5569	7354	12365	6047	9412	5695	14134	CGCTGTTCTCCCTGGATGACTAATATATCAAGCATGGTATTTGTTTTGTGCTCTGAAGAACTTGCTCGTAGTGGTATCATTGGTCTTCATGTTGGCGGAAGCTGATGTCATTTAAAGTATTATTCATTCGTGGTGAAT	FALSE	0.986175	1.03742	1.01622	0.989506	0.978573	0.992588	1.12171	0.902203	1.00336	0.787452	0.852051	0.764324	1.041	1.05715	1.08197	0.93956	0.943908	0.921068	1.00241	0.907949	1.00487
inducibleMutant_.i2.-122759899_mm_chr8:10131055$scrRFX5_scrRFX5at-17^scrCREB5_scrCREB5at-42^scrRFX5_scrRFX5at-41^scrCREB5_scrCREB5at-24^RFX5_RFX5at-2^scrRFX5_scrRFX5at26^CREB5_CREB5at31_1	1159	1347	618	1475	2342	1103	1786	1103	1912	2134	2453	1390	1803	1238	840	2599	1839	2506	1437	1194	1181	2070	1132	1755	1020	2439	CGCTGTTCTCCCTGGATGACTAATATATCAAGCATGGTATTTGTTTTGTGCTCTGTAGAACTTCCTCCATCACCATAGTAACCTCTTCATGTTGGCGGAAGCTGATGTCATTTAAAGTATTATTCATTCGTGGTGAAT	FALSE	1.49836	1.56829	1.48032	1.4358	1.64437	1.7226	2.40889	2.06643	2.12667	1.12211	1.48996	1.25647	1.46318	1.42724	1.4074	1.13738	1.19113	1.29973	1.70485	1.41694	1.62401
inducibleMutant_.If.-440529664_mm_chr8:10131055$scrRFX5_scrRFX5at-17^scrCREB5_scrCREB5at-42^scrRFX5_scrRFX5at-41^scrCREB5_scrCREB5at-24^RFX5_RFX5at-2^scrRFX5_scrRFX5at26^CREB5_CREB5at31_1	4809	4374	2412	7151	12061	6039	8503	4325	6235	7146	10780	5878	8045	6515	4112	11936	7897	14612	9038	7400	5763	9283	4989	8106	4650	11855	CGCTGTTCTCCCTGGATGACTAATATATCAAGCATGGTATTTGTTTTGTGCTGACTTCTTGAACGAGGATCACCATAGTAACCTCTTCATGTTGGCGGAAGCTGATGTCATTTAAAGTATTATTCATTCGTGGTGAAT	FALSE	1.25125	1.26022	1.25514	1.06982	1.01895	1.09612	2.45302	2.23525	2.44568	0.977951	1.01624	1.03003	1.28421	1.23639	1.29991	1.05465	1.01504	1.08849	1.88895	1.69345	1.91259
inducibleMutant_.i1.-2013068475_mm_chr8:10131055$scrRFX5_scrRFX5at-17^scrCREB5_scrCREB5at-42^scrRFX5_scrRFX5at-41^scrCREB5_scrCREB5at-24^RFX5_RFX5at-2^scrRFX5_scrRFX5at26^CREB5_CREB5at31_1	88	97	37	133	227	106	161	145	270	247	398	160	268	148	53	132	73	297	181	124	70	126	165	188	121	241	CGCTGTTCTCCCTGGATGACTAATATATCAAGCATGGTATTTGTTTTGTGCTGTGAAGAACTAGCTCCATCACCATAGTAACCTCTTCATGTTGGCGGAAGCTGATGTCATTTAAAGTATTATTCATTCGTGGTGAAT	FALSE	2.03357	1.51005	1.84058	1.57886	1.94238	1.66781	2.40952	2.22185	2.26718	0.945129	1.19024	0.834492	1.31111	1.41625	1.16327	0.563913	0.606484	1.58471	1.69013	1.4929	1.4108
inducibleMutant_.i1.-492653998_mm_chr8:10131055$scrCREB5_scrCREB5at-24^scrCREB5_scrCREB5at-42^scrRFX5_scrRFX5at-41^scrRFX5_scrRFX5at-17^RFX5_RFX5at-2^scrRFX5_scrRFX5at26^CREB5_CREB5at31_1	3039	2901	1508	5326	8573	4334	6661	3033	4382	4739	7381	4204	5336	4408	2641	6380	4232	9073	5157	4098	3571	5992	3318	5009	3053	7723	CGCTGTTCTCCCTGGATGACTAATATATCAAGCATGGTATTTGTTTTGTGGTCTGAAGAACTTGCTCCATCACCATAGTAACCTCTTCATGTTGGCGGAAGCTGATGTCATTTAAAGTATTATTCATTCGTGGTGAAT	FALSE	1.26623	1.33215	1.23043	1.10884	1.05843	1.07437	2.33221	2.02819	2.24056	0.788907	0.860396	0.822069	1.17287	1.19978	1.25161	0.965882	0.968368	1.06995	1.73354	1.42814	1.56544
inducibleMutant_.i1.1326072963_mm_chr8:10131055$scrCREB5_scrCREB5at-42^scrRFX5_scrRFX5at-41^scrCREB5_scrCREB5at-24^scrRFX5_scrRFX5at-17^RFX5_RFX5at-2^scrRFX5_scrRFX5at26^CREB5_CREB5at31_1	4635	4485	2302	6977	12244	6306	8245	4200	6279	6752	10573	5971	7810	5710	3777	9811	6163	11819	7481	6193	5197	8185	4320	8248	4445	11065	CGCTGTTCTCCCTGGATGACTAATATATCAAGGACGGTATTTGTTTTGTGCTCTGAAGAACTTGCTCCATCACCATAGTAACCTCTTCATGTTGGCGGAAGCTGATGTCATTTAAAGTATTATTCATTCGTGGTGAAT	FALSE	1.40023	1.46064	1.39026	1.18536	1.17081	1.1817	2.46822	2.34017	2.63372	0.972061	1.07464	1.01382	1.49092	1.3485	1.38433	1.08516	1.02116	1.07541	1.74329	1.59933	1.82629
inducibleMutant_.i2.-1861854510_mm_chr8:10131055$scrRFX5_scrRFX5at-41^scrCREB5_scrCREB5at-42^scrCREB5_scrCREB5at-24^scrRFX5_scrRFX5at-17^RFX5_RFX5at-2^scrRFX5_scrRFX5at26^CREB5_CREB5at31_1	3523	3552	1750	6664	10011	5798	6383	2546	4111	4703	7649	4271	5564	4237	2605	6966	4574	10162	7146	6211	3273	5284	2833	5655	3420	8196	CGCTGTTCTCCCTGGATGACTAATATATCAATCATGGTACTTGTTTTGTGCTCTGAAGAACTTGCTCCATCACCATAGTAACCTCTTCATGTTGGCGGAAGCTGATGTCATTTAAAGTATTATTCATTCGTGGTGAAT	FALSE	1.36516	1.408	1.33478	0.968364	1.03305	1.10924	3.0452	2.47154	3.12795	0.954382	1.09936	0.995542	1.37758	1.39825	1.38188	0.921008	0.888412	0.950418	2.01997	2.05882	2.46836
inducibleMutant_.ip.1601169619_mm_chr8:10131055$scrRFX5_scrRFX5at-41^scrCREB5_scrCREB5at-42^scrCREB5_scrCREB5at-24^scrRFX5_scrRFX5at-17^RFX5_RFX5at-2^scrRFX5_scrRFX5at26^CREB5_CREB5at31_1	6597	5769	3134	8180	14151	7759	10206	5189	8020	8607	12594	6982	9144	7530	4673	10992	8012	15010	9736	7962	6212	10608	5109	9398	5419	13033	CGCTGTTCTCCCTGGATGACTAATATATCCGAGAGTGATGCTCCTTTGTGCTCTGAAGAACTTGCTCCATCACCATAGTAACCTCTTCATGTTGGCGGAAGCTGATGTCATTTAAAGTATTATTCATTCGTGGTGAAT	FALSE	1.26476	1.29514	1.23431	1.11052	1.134	1.14227	2.33778	2.18497	2.61792	1.1177	1.1167	1.11504	1.2882	1.24664	1.23645	0.983586	1.00357	0.964423	1.67884	1.57834	1.78046
inducibleMutant_.i1.1528999250_mm_chr8:10131055$scrRFX5_scrRFX5at-41^scrCREB5_scrCREB5at-42^scrCREB5_scrCREB5at-24^scrRFX5_scrRFX5at-17^RFX5_RFX5at-2^scrRFX5_scrRFX5at26^CREB5_CREB5at31_1	3506	3730	1962	7203	11099	6096	6482	3281	5252	5661	8765	4941	5828	4518	2738	7438	4619	11125	7082	5774	3992	6692	3333	6121	3767	9110	CGCTGTTCTCCCTGGATGACTAATATATGAAGCATGGTATTTGTTTTGTGCTCTGAAGAACTTGCTCCATCACCATAGTAACCTCTTCATGTTGGCGGAAGCTGATGTCATTTAAAGTATTATTCATTCGTGGTGAAT	FALSE	1.46705	1.52757	1.31116	1.1703	1.23769	1.25215	3.24123	2.6983	3.23849	0.93527	1.13681	1.0991	1.39836	1.44433	1.44045	1.05346	1.05516	1.04861	2.07386	1.91348	2.15197
inducibleMutant_.If.1686649832_mm_chr8:10131055$scrRFX5_scrRFX5at-41^scrCREB5_scrCREB5at-42^scrCREB5_scrCREB5at-24^scrRFX5_scrRFX5at-17^RFX5_RFX5at-2^scrRFX5_scrRFX5at26^CREB5_CREB5at31_1	4309	4394	2380	6667	10175	5883	7453	4288	6338	7066	10301	5591	7426	6095	3710	8759	6100	10089	7031	5826	5087	8715	4139	8065	4321	10834	CGCTGTTCTCCCTGGATGACTAATATATGTTCGTACCATAAACATTTGTGCTCTGAAGAACTTGCTCCATCACCATAGTAACCTCTTCATGTTGGCGGAAGCTGATGTCATTTAAAGTATTATTCATTCGTGGTGAAT	FALSE	1.27804	1.28129	1.23841	1.13376	1.10716	1.15854	2.60919	2.15138	2.71815	0.999723	1.16471	1.15956	1.36576	1.22808	1.26982	0.995093	1.0186	0.965269	1.39412	1.40818	1.60954
inactive_.chr1:108068050_base_inactive_1	4284	4530	2024	2185	4623	1859	5207	2962	4489	4613	5877	3045	4189	4525	4379	9271	7931	5073	3499	2647	3560	6446	3173	3951	2463	5558	CGCTGTTGGTCTCTTCTGGGTATCCTCGACACGAAGATGAACTACAACCCCCACTGTGCAACGCGAGCCCCTCTCGCCACCTCTCCTCTATGGCGAGGACAAACCTCCTGGGAAACAGCTCCGCCCCACCCCCGTACG	TRUE	0.982144	0.939942	0.940966	1.05488	1.05624	1.01877	1.22397	1.39911	1.22941	1.42264	1.7187	1.41146	0.90122	0.942894	0.877456	0.938009	1.0148	0.996731	0.944215	0.94393	0.98501
inducibleMutant_.i2.1377582779_mm_chr8:108225440$CREB5_CREB5at-27^RFX5_RFX5at14^scrRFX5_scrRFX5at33_1	8531	8908	4320	5373	11907	5957	12882	3933	6478	6654	8680	4823	6510	5933	9069	16620	12062	10535	7401	5305	5142	8621	4310	6296	3577	8439	CGGATTGGTCGAGTCCTTTTTGGGACGCTCGAACCATAGCGTAAGGCCGTAAGAACAGAGAAAGCCCTCTCTGCCTCCGTCTCCGTTTCCTAGGAAACGTAGACTCCACGTTTCTCGGTGTCGCGTCCCCCTTGACGT	FALSE	1.10633	1.13547	1.11529	1.06829	1.16252	1.12078	1.21658	1.45658	1.59239	1.14512	1.36611	1.21772	1.0953	1.04439	1.01611	1.03332	1.03513	1.03259	1.49549	1.52276	1.50562
inducibleMutant_.i1.-398794619_mm_chr8:108225440$CREB5_CREB5at-27^RFX5_RFX5at14^scrRFX5_scrRFX5at33_1	16583	18713	9151	13213	26990	15714	26149	9002	14020	14888	21236	12071	16408	12225	17605	31437	25375	22404	15306	10891	10541	18408	9217	13199	8048	19324	CGGATTGGTCGAGTCCTTTTTGGGACGCTCGAACCATAGCGTAATGACGGACGAACAGAGAAAGCCCTCTCTGCCTCCGTCTCCGTTTCCTAGGAAACGTAGACTCCACGTTTCTCGGTGTCGCGTCCCCCTTGACGT	FALSE	1.3136	1.3792	1.36423	1.18667	1.22104	1.21702	1.47385	1.62653	2.06937	1.09659	1.41377	1.27075	1.11438	1.1404	1.12921	1.02804	1.07267	1.07169	1.54348	1.52836	1.50011
inducibleMutant_.i2.78034401_mm_chr8:108225440$RFX5_RFX5at14^CREB5_CREB5at-27^scrRFX5_scrRFX5at33_1	10595	10294	5277	6893	14350	7536	18002	6215	9506	9872	12795	6795	9368	8493	13255	25398	19093	17392	12657	8525	8310	14141	7108	9101	5520	13303	CGGATTGGTCGAGTCCTTTTTGGGACGCTCGAACCATAGCGTAATGACGTAAGAACAGAGAAAGCCCTCTCTGCCTCCGTCTCCCTTTCCTAGGAATCGTAGACTCCACGTTTCTCGGTGTCGCGTCCCCCTTGACGT	FALSE	1.13925	1.11753	1.12116	1.17928	1.19171	1.16159	1.11685	1.25616	1.44154	1.01769	1.12967	1.06442	1.10604	1.12589	1.11896	1.16658	1.18612	1.18963	1.7247	1.81921	1.6902
inducibleMutant_.i1.-1749598591_mm_chr8:108225440$RFX5_RFX5at14^CREB5_CREB5at-27^scrRFX5_scrRFX5at33_1	9513	9854	4720	6032	12541	5945	16876	6415	10371	11276	13224	6910	9726	8755	12779	22033	17432	15633	10646	7659	9174	14878	7475	9636	5450	13455	CGGATTGGTCGAGTCCTTTTTGGGACGCTCGAACCATAGCGTAATGACGTAAGAACAGAGAAAGCCCTCTCTGCCTCCGTCTCCGATTCCTAGGAAAGGTAGACTCCACGTTTCTCGGTGTCGCGTCCCCCTTGACGT	FALSE	1.14221	1.10244	1.12917	1.18081	1.26124	1.28709	1.04255	1.17106	1.21308	0.974725	1.15354	1.01559	1.13601	1.07834	1.09788	1.24933	1.21059	1.21362	1.50387	1.48438	1.47306
inducibleMutant_.ip.1717625415_mm_chr8:108225440$RFX5_RFX5at14^CREB5_CREB5at-27^scrRFX5_scrRFX5at33_1	13955	14580	7666	21141	36425	22173	18190	8332	13822	14225	24036	14009	19172	9413	12475	24187	18324	20445	13524	10106	9160	16314	8240	11495	7221	16478	CGGATTGGTCGAGTCCTTTTTGGGACGCTCGAACCATAGCGTAATGACGTAAGAACAGAGAAAGCCCTCTCTGCCTCCGTCTCCGTTGCCATGGCAACGTAGACTCCACGTTTCTCGGTGTCGCGTCCCCCTTGACGT	FALSE	1.93096	2.07879	2.07024	1.42646	1.56342	1.5102	3.38999	3.1556	4.19757	1.32657	1.58349	1.53032	1.26044	1.32888	1.25055	1.16023	1.23465	1.2443	1.8293	1.75385	1.80783
inducible_.chr8:108225440_base_inducible_1	14559	15743	7878	21190	39666	24537	20206	7499	12125	12622	23499	13076	18214	9767	15094	26907	21666	27347	21556	16948	8788	15318	7501	11711	7246	17404	CGGATTGGTCGAGTCCTTTTTGGGACGCTCGAACCATAGCGTAATGACGTAAGAACAGAGAAAGCCCTCTCTGCCTCCGTCTCCGTTTCCTAGGAAACGTAGACTCCACGTTTCTCGGTGTCGCGTCCCCCTTGACGT	FALSE	1.81939	1.87002	1.89551	1.23732	1.32176	1.29145	3.05884	3.09352	4.18165	1.24591	1.53921	1.41574	1.23759	1.28515	1.27296	1.07276	1.11725	1.09165	2.35816	2.69415	2.92188
inducibleMutant_.i2.1004878625_mm_chr8:108225440$scrRFX5_scrRFX5at33^CREB5_CREB5at-27^RFX5_RFX5at14_1	18693	20440	10774	31639	58348	36912	26500	10325	16663	17530	36113	20578	29200	13036	19227	36106	27264	43027	30247	24721	11938	19975	10014	16290	10166	25379	CGGATTGGTCGAGTCCTTTTTGGGACGCTCGAACCATAGCGTAATGACGTAAGAACAGAGAAAGCCCTCTCTGCCTCCGTCTCCGTTTCCTAGGAAACGTAGACTTCACGTTTCTCGGTGTCGCGTCCCCCTTGACGT	FALSE	2.09487	2.20491	2.27678	1.27639	1.36095	1.34384	3.48243	3.46972	4.79654	1.21974	1.52379	1.47631	1.28979	1.3509	1.39077	1.09185	1.09157	1.09192	2.77985	2.83238	3.19321
inducibleMutant_.ip.1763414174_mm_chr8:108225440$scrRFX5_scrRFX5at33^CREB5_CREB5at-27^RFX5_RFX5at14_1	13269	14758	8280	24464	45385	29537	20125	6555	10946	11632	25514	14743	20506	8433	12358	27386	22267	31353	24939	19872	8633	13627	6674	12714	7097	18125	CGGATTGGTCGAGTCCTTTTTGGGACGCTCGAACCATAGCGTAATGACGTAAGAACAGAGAAAGCCCTCTCTGCCTCCGTCTCCGTTTCCTAGGAAACGTAGCCGAGAGTGATGCTCCTGTCGCGTCCCCCTTGACGT	FALSE	2.28789	2.44195	2.47161	1.25265	1.38199	1.37842	3.54566	3.55378	5.05402	1.14008	1.44871	1.49397	1.55612	1.45784	1.5354	1.22055	1.15114	1.12494	3.13128	3.61003	3.96794
inducibleMutant_.i1.1995171325_mm_chr8:108225440$scrRFX5_scrRFX5at33^CREB5_CREB5at-27^RFX5_RFX5at14_1	10755	11843	6232	16207	28781	19461	15506	4926	8558	8524	16586	9413	12709	7050	12163	20460	17096	20462	17286	13318	6128	10136	5373	8404	4951	12207	CGGATTGGTCGAGTCCTTTTTGGGACGCTCGAACCATAGCGTAATGACGTAAGAACAGAGAAAGCCCTCTCTGCCTCCGTCTCCGTTTCCTAGGAAACGTAGGCTCCACGTTACTCGGTGTCGCGTCCCCCTTGACGT	FALSE	1.77906	1.86497	1.83233	1.12601	1.29246	1.20827	3.04866	2.92497	4.32187	1.19935	1.50887	1.4594	1.23038	1.21652	1.23693	1.03635	1.02421	1.08331	2.44446	2.99309	3.18094
inducibleMutant_.If.-1955950611_mm_chr8:108225440$scrRFX5_scrRFX5at33^CREB5_CREB5at-27^RFX5_RFX5at14_1	10316	11925	5827	16985	31806	19710	12957	4966	7499	8071	17958	10254	15019	6754	11207	23154	17898	24070	17172	14430	5896	10137	5160	8689	4719	13511	CGGATTGGTCGAGTCCTTTTTGGGACGCTCGAACCATAGCGTAATGACGTAAGAACAGAGAAAGCCCTCTCTGCCTCCGTCTCCGTTTCCTAGGAAACGTAGTGAGGTGCAAAGAGCCTGTCGCGTCCCCCTTGACGT	FALSE	2.01064	2.12063	2.26028	1.18491	1.18216	1.1942	3.82355	3.86829	5.23828	1.37671	1.81821	1.633	1.32786	1.21034	1.42907	1.04081	1.0692	1.08596	3.00151	3.10366	3.59758
inducibleMutant_.If.-132597216_mm_chr8:108225440$RFX5_RFX5at14^CREB5_CREB5at-27^scrRFX5_scrRFX5at33_1	5342	4810	2492	3455	6195	3084	9240	3908	6328	6387	7684	4023	5179	5357	6579	12158	8183	7942	5174	3680	5485	9020	4570	5455	3136	7687	CGGATTGGTCGAGTCCTTTTTGGGACGCTCGAACCATAGCGTAATGACGTAAGAACAGAGAAAGCCCTCTCTGCCTCCGTCTCGCAAAGGATCCTTTGCTAGACTCCACGTTTCTCGGTGTCGCGTCCCCCTTGACGT	FALSE	1.08469	1.04896	0.982667	1.17563	1.2577	1.19148	1.09064	1.05654	1.14934	0.999692	1.0284	0.979315	1.05103	1.01408	1.02509	1.22076	1.19949	1.21261	1.24863	1.17901	1.15673
inducibleMutant_.ip.-23347884_mm_chr8:108225440$CREB5_CREB5at-27^RFX5_RFX5at14^scrRFX5_scrRFX5at33_1	21436	22175	12959	27435	52179	33111	23106	11509	18902	19135	28967	17055	23162	11598	19253	36303	30790	33007	26907	20199	11350	19805	10181	15060	9025	21188	CGGATTGGTCGAGTCCTTTTTGGGACGCTCGAACCATAGCGTAATGACGTCACCACAGAGAAAGCCCTCTCTGCCTCCGTCTCCGTTTCCTAGGAAACGTAGACTCCACGTTTCTCGGTGTCGCGTCCCCCTTGACGT	FALSE	1.88868	2.054	2.0299	1.59916	1.73523	1.64875	3.46327	3.55865	4.93462	1.60418	1.89596	2.03654	1.34024	1.34797	1.30507	1.16678	1.21647	1.24777	2.39689	2.83202	2.9326
inducibleMutant_.If.1937301144_mm_chr8:108225440$CREB5_CREB5at-27^RFX5_RFX5at14^scrRFX5_scrRFX5at33_1	11113	12347	6235	8213	16531	8339	17497	8050	11949	13280	17825	10168	13635	11519	10665	20148	16436	13899	8986	6607	10271	16588	8289	11312	6877	16573	CGGATTGGTCGAGTCCTTTTTGGGACGCTCGAACCATAGCGTTTACTGCATTCTACAGAGAAAGCCCTCTCTGCCTCCGTCTCCGTTTCCTAGGAAACGTAGACTCCACGTTTCTCGGTGTCGCGTCCCCCTTGACGT	FALSE	1.17018	1.23297	1.20316	1.12621	1.10446	1.15211	1.36913	1.48885	1.64118	1.09825	1.39408	1.29396	1.0136	1.03419	1.02781	1.0631	1.02586	1.02285	1.01623	0.952283	0.965817
RFXrandMutant_.i1.1599867168_mm_chr14:38637770$RFX5_RFX5at35_1	662	741	399	458	880	357	1326	818	1222	1263	1700	882	1143	1241	818	1833	1425	1200	748	700	1164	1605	764	1057	627	1748	CGGGCTCAGAAAGGGCTCTGCTCCCTCATCGGAGCGATGCCAAATGGGGAGGAATAGAGAGACCTTTCATCTCCCCCCAGCGGAACTAGGCACTGCTCCAATTTCTATGCCAAGACAGGGTTGGCTGGGTTGAGTGGG	FALSE	1.03589	0.992725	0.936174	1.06223	1.04841	1.01705	1.00746	1.04581	0.927109	0.863274	1.10399	1.09264	0.879115	0.875211	1.00623	1.1183	0.921327	0.875081	0.814393	0.735773	0.949799
putativeConstitWgoodRFXsite_.chr14:38637770_base_RFX25_great_tiles_from_constitK27_CBP_peaks_1	1937	1615	774	1177	2202	1150	2362	1202	1878	1942	2633	1336	1928	1972	2149	4763	3297	3443	1701	1352	1752	2985	1424	2113	1150	2670	CGGGCTCAGAAAGGGCTCTGCTCCCTCATCGGAGCGATGCCAAATGGGGAGGAATAGAGAGACCTTTCATCTCCCCCCAGCGGAACTAGGCACTGCTCCAATTTCTGTGCCAAGACAGCGTTGGCTGGGTTGAGTGGG	FALSE	1.00968	0.946306	0.993761	0.982282	1.01396	0.984131	1.45346	1.4691	1.67658	1.41803	1.35077	1.18989	1.10595	1.0102	0.96723	1.05926	1.07832	1.02643	1.47047	1.05296	1.15445
RFXrandMutant_.If.-1461027990_mm_chr14:38637770$RFX5_RFX5at35_1	2218	2346	955	1400	2474	1176	3470	1745	2579	2566	3348	1798	2413	2465	2206	5779	3914	3794	2302	1861	2278	3778	2014	2456	1365	3704	CGGGCTCAGAAAGGGCTCTGCTCCCTCATCGGAGCGATGCCAAATGGGGAGGAATAGAGAGACCTTTCATCTCCCCCCAGCGGAACTAGGCACTGCTCCAATTTGACACGGTTCTGTCGCTTGGCTGGGTTGAGTGGG	FALSE	1.02709	1.01884	0.994998	1.14082	1.11395	1.04028	1.1768	1.12353	1.16704	1.10526	1.33564	0.999356	1.02838	0.959252	1.07344	1.10182	1.09183	1.16137	1.2963	1.13999	1.27126
inducibleMutant_.i2.1818666678_mm_chr15:101084545$scrRFX5_scrRFX5at-29_1	1565	29	299	3684	9034	259	320	1232	1763	1873	4185	2217	2979	1736	1891	93	2809	4276	2783	6243	1514	2776	1310	3126	2014	4612	CGGGGCGCTCGAGGCTATTCCGGGCGCCGCTATTTTTAGCCCATTGATGAGCCTGCGTCGGCTGCCGCCGCCGGGATTCCGGAGACGTCAATGGGCGCGCGTCACGGTCCCCGCCCGGCCTCCCGCCGGGGGAGGAGT	FALSE	1.82299	1.78381	1.74423	1.14367	1.08127	1.0782	33.5796	44.4882	2.78712	8.45666	0.179035	3.39287	1.85858	2.00968	1.89786	1.0398	1.13915	1.07263	2.0745	1.95694	6.05549
inducible_.chr15:101084545_base_inducible_1	2209	29	386	5839	13841	329	557	2560	3767	3982	7891	4585	5768	3123	2878	83	4276	6323	4028	9226	3348	5392	2754	5764	4024	8961	CGGGGCGCTCGAGGCTATTCCGGGCGCCGCTATTTTTAGCCCATTGATGAGGCTGCGTCGGCTGCCGCCGCCGGGATTCCGGAGACGTCAATGGGCGCGCGTCACGGTCCCCGCCCGGCCTCCCGCCGGGGGAGGAGT	FALSE	1.91073	2.05069	1.87731	1.32101	1.28427	1.27421	30.5766	39.1586	2.03398	6.85764	0.102857	2.51639	1.905	2.23204	2.04979	1.27817	1.22995	1.25348	1.7052	1.57446	4.97447
inducibleMutant_.ip.1461327897_mm_chr15:101084545$scrRFX5_scrRFX5at-29_1	1333	22	352	2443	5398	251	444	1503	2203	2264	4009	2351	3083	2227	1739	114	2634	3011	1903	3235	2203	3360	1773	2971	1893	4315	CGGGGCGCTCGAGGCTATTCCGGGCGCCGCTATTTTTAGCCCGAGAGTGATGCTCCGTCGGCTGCCGCCGCCGGGATTCCGGAGACGTCAATGGGCGCGCGTCACGGTCCCCGCCCGGCCTCCCGCCGGGGGAGGAGT	FALSE	1.3613	1.47457	1.40713	1.08762	1.05324	1.01594	16.0489	19.1586	1.94669	5.19136	0.097888	2.87876	1.37697	1.47247	1.38416	1.17942	1.0748	1.13166	1.13872	1.04312	2.44602
inducibleMutant_.i1.-182611204_mm_chr15:101084545$scrRFX5_scrRFX5at-29_1	1775	68	398	4466	9357	418	448	1269	1931	2037	3980	2184	3220	1878	2074	75	3592	5716	3999	6993	1881	3026	1448	3200	1962	4564	CGGGGCGCTCGAGGCTATTCCGGGCGCCGCTATTTTTAGCGCATTGATGAAGCTGCGTCGGCTGCCGCCGCCGGGATTCCGGAGACGTCAATGGGCGCGCGTCACGGTCCCCGCCCGGCCTCCCGCCGGGGGAGGAGT	FALSE	1.6026	1.62439	1.74278	1.08894	1.09476	1.08394	29.0768	32.9134	3.21295	6.85101	0.299862	3.2259	1.75872	1.80976	1.7361	1.19418	1.14785	1.09597	2.56343	2.59938	6.27008
inducibleMutant_.If.-42099355_mm_chr15:101084545$scrRFX5_scrRFX5at-29_1	2756	84	718	2145	5522	269	866	2082	3130	3341	4947	2644	3702	3511	3378	265	6135	3664	2417	3319	2788	4549	2461	3861	2018	4965	CGGGGCGCTCGAGGCTATTCCGGGCGCCGCTATTTTTAGCGGTAACTACTCCGACGGTCGGCTGCCGCCGCCGGGATTCCGGAGACGTCAATGGGCGCGCGTCACGGTCCCCGCCCGGCCTCCCGCCGGGGGAGGAGT	FALSE	1.06549	1.05187	1.07174	0.955627	0.949174	0.950947	7.22462	10.0483	1.06965	5.50295	0.191625	3.0106	1.13504	0.995651	1.01022	0.946755	0.922987	0.99634	0.87892	0.84035	1.59178
inducibleMutant_.i2.-130313060_mm_chr1:55109510$RFX5_RFX5at43^RFX5_RFX5at-69^CREB5_CREB5at49_1	2798	1490	1463	1951	4750	2221	5333	2317	3459	3492	4473	2517	3565	2934	3163	4213	6153	4509	3565	2911	2623	4998	2280	3542	2028	4844	CGTCACGAAGATTACATAAGTGGCAGACTCCTGGCAGGAGCAGAGCGTGTCCCGGAGATCCGCGCCCCGATTGGCTGTCCCGAGGCGGCACTGGACACGTGCGTCAGCCTAGCCTCAGCGTGGCGTCATGGGGTTGGG	FALSE	1.15286	1.19827	1.23504	1.27264	1.25523	1.18939	1.06707	1.40358	1.43411	0.907216	0.551956	0.996137	1.24604	1.19736	1.17942	1.06589	1.21352	1.10459	1.29433	1.48325	1.67066
inducibleMutant_.i1.1940243343_mm_chr1:55109510$RFX5_RFX5at43^RFX5_RFX5at-69^CREB5_CREB5at49_1	850	589	560	732	1566	835	1450	566	913	868	1410	730	910	755	820	1203	1930	1537	1119	945	828	1292	770	1098	547	1401	CGTCACGAAGATTACATAAGTGGCAGACTCCTGGCAGGAGCAGAGCGTGTCCCGGAGATCCGCGCCCCGATTGGCTGTCCCGAGGCGGCACTGGACACGTGCGTCAGCCTAGCGACAGCGTGGCGTGATGGGGTTGGG	FALSE	1.41225	1.35054	1.22511	1.20811	1.28753	1.1489	1.47248	1.70192	1.98301	1.01364	0.802485	1.40238	1.50106	1.25504	1.32561	1.30755	1.21906	1.44967	1.71456	1.80924	2.10761
inducibleMutant_.ip.-1805820145_mm_chr1:55109510$CREB5_CREB5at49^RFX5_RFX5at-69^RFX5_RFX5at43_1	1385	1226	830	2023	4678	3052	2502	1107	1725	1958	3258	1752	2707	1532	1469	3222	3482	3680	3704	3438	1673	2590	1415	2527	1536	4009	CGTCACGAAGATTACATAAGTGGCAGACTCCTGGCAGGAGCAGAGCGTGTCCCGGAGATCCGCGCCCCGATTGGCTGTCCCGAGGCGGCACTGGACACGTGCGTCAGCCTAGCGTCAGAATGACGTCACCGGGTTGGG	FALSE	1.60816	1.59738	1.79602	1.16447	1.19884	1.27722	2.35838	2.94637	4.20052	0.957187	0.968039	1.20458	1.70251	1.7368	1.8694	1.30201	1.20435	1.31288	2.02308	2.95139	3.77879
inducibleMutant_.i2.-2025007727_mm_chr1:55109510$CREB5_CREB5at49^RFX5_RFX5at-69^RFX5_RFX5at43_1	1988	750	1127	2231	4341	2167	4542	1985	3060	3295	5046	2530	3461	3235	2437	2216	5080	3459	3168	2675	2921	4868	2395	3446	2073	4814	CGTCACGAAGATTACATAAGTGGCAGACTCCTGGCAGGAGCAGAGCGTGTCCCGGAGATCCGCGCCCCGATTGGCTGTCCCGAGGCGGCACTGGACACGTGCGTCAGCCTAGCGTCAGCGGGCCGTCATGGGGTTGGG	FALSE	1.17954	1.09239	1.08745	0.988837	1.00712	1.01787	1.43271	1.50611	1.64293	0.756839	0.326215	0.900997	1.09947	1.11005	1.06306	1.07655	1.07198	1.05234	0.900536	1.19543	1.39237
inducibleMutant_.i1.371120533_mm_chr1:55109510$CREB5_CREB5at49^RFX5_RFX5at-69^RFX5_RFX5at43_1	4049	807	2227	2871	5809	2598	6208	3482	5460	5555	7764	4342	5547	4637	4645	2556	8651	5797	4817	4004	4822	8093	4138	5569	3327	8162	CGTCACGAAGATTACATAAGTGGCAGACTCCTGGCAGGAGCAGAGCGTGTCCCGGAGATCCGCGCCCCGATTGGCTGTCCCGAGGCGGCACTGGACACGTGCGTCAGCCTAGCGTCAGCGTGGCGGCCTGGGGTTGGG	FALSE	1.26615	1.30793	1.21591	1.21013	1.25368	1.19718	1.34892	1.47457	1.4411	1.1278	0.25681	1.30261	1.2396	1.24289	1.25743	1.23984	1.24332	1.26847	1.05291	1.2681	1.45399
inducible_.chr1:55109510_base_inducible_1	5340	2794	2933	7711	16988	9315	9695	3594	5662	6031	10014	5491	7975	5646	5577	7630	11254	13078	12128	10592	4891	8088	4043	7556	4657	10828	CGTCACGAAGATTACATAAGTGGCAGACTCCTGGCAGGAGCAGAGCGTGTCCCGGAGATCCGCGCCCCGATTGGCTGTCCCGAGGCGGCACTGGACACGTGCGTCAGCCTAGCGTCAGCGTGGCGTCATGGGGTTGGG	FALSE	1.34124	1.35845	1.43573	1.02583	1.06773	1.06748	2.3199	2.76127	3.30858	0.952418	0.569336	1.09853	1.38132	1.42884	1.37004	1.03284	1.02049	1.01786	1.95086	2.62218	3.15895
inducibleMutant_.If.-158358850_mm_chr1:55109510$CREB5_CREB5at49^RFX5_RFX5at-69^RFX5_RFX5at43_1	1294	721	739	888	2525	980	3274	1336	1776	1928	2593	1422	1753	2056	1326	2201	3324	1986	1705	1268	1807	2538	1288	1916	1135	2809	CGTCACGAAGATTACATAAGTGGCAGACTCCTGGCAGGAGCAGAGCGTGTCCCGGAGATCCGCGCCCCGATTGGCTGTCCCGAGGCGGCACTGGACACGTGCGTCAGCCTAGCGTCAGGCACCGCAGTACGGGTTGGG	FALSE	0.953713	0.96607	0.866644	1.04718	0.919713	0.937119	0.791116	1.21534	1.03075	0.683424	0.435057	0.819619	0.961866	0.95629	0.97601	1.04788	0.879385	0.89047	0.813544	1.01231	1.03849
inducibleMutant_.ip.-1753730982_mm_chr1:55109510$RFX5_RFX5at43^RFX5_RFX5at-69^CREB5_CREB5at49_1	3171	2480	2342	2456	6962	3173	4846	2666	4144	4372	5390	2878	4122	3160	2658	4969	5850	3623	3101	2665	3047	5050	2553	3819	2172	5319	CGTCACGAAGATTACATAAGTGGCAGACTCCTGGCAGGAGCAGAGCGTGTCCCGGAGATCCGCGCCCCGATTGGCTGTCCCGAGGCGGCACTGGACACGTGCGTCAGCCTAGCGTTGCCATGGCAACGTGGGGTTGGG	FALSE	1.28985	1.27214	1.32588	1.3596	1.39626	1.38262	1.47826	2.26394	2.25472	1.13148	1.01102	1.75489	1.2474	1.19067	1.20245	1.14964	1.13845	1.14839	0.965619	1.19792	1.42009
inducibleMutant_.If.-1645565241_mm_chr1:55109510$RFX5_RFX5at43^RFX5_RFX5at-69^CREB5_CREB5at49_1	964	622	559	776	1597	801	2852	948	1604	1420	2158	1110	1513	1508	1261	1772	2806	1703	1345	1046	1207	2330	1047	1571	835	2135	CGTCACGAAGATTACATAAGTGGCAGACTCCTGGCAGGAGCAGAGCGTGTCCCGGAGATCCGCGCCCCGATTGGCTGTCCCGAGGCGGCACTGGACACGTGCGTCAGCCTAGGCAGTCGCACCGCAGTTGGGGTTGGG	FALSE	1.08215	1.02814	1.01981	1.01308	1.13249	0.941018	0.79363	0.882409	0.96714	0.58447	0.430855	0.711719	1.07527	0.959184	1.0114	0.954293	1.10069	0.986897	0.951126	1.08877	1.16798
inducibleMutant_.ip.631010680_mm_chr10:105010090$scrCREB5_scrCREB5at-25^scrCREB5_scrCREB5at-6_1	986	772	443	1397	2392	1385	1941	928	1390	1614	2905	1601	2251	1530	1030	2372	1700	2880	2012	1639	1058	1865	1025	2160	1289	3082	CGTGAGCAAGGTTGGGGGAGCGAGAGATACAACCAGCAGCGAGAAACCCTCAAGGTTTTACTATCATACACGTCAAAGAGAAAGTTGACTCAGAGTACGCGCGCTCTTTCCTCTATTTGGCAACTGTCATATGTGCGT	FALSE	1.4358	1.46161	1.49543	0.977451	0.967288	1.0542	2.09931	1.942	2.45714	0.878387	0.785745	0.828752	1.45715	1.45941	1.43902	0.824461	0.868356	0.952268	1.58535	1.60528	1.80382
inducibleMutant_.If.1586017391_mm_chr10:105010090$scrCREB5_scrCREB5at-25^scrCREB5_scrCREB5at-6_1	1969	1442	951	4157	6158	3835	3974	1708	2703	2916	5883	2991	4136	2792	1953	4773	3010	7338	5227	4569	2153	4131	2021	4564	2663	6559	CGTGAGCAAGGTTGGGGGAGCGAGAGATACAACCAGCAGCGAGAATGTCGAGTTTCTTTACTATCATACACGTCAAAGAGAAAGTTGACTCAGAGTACGCGCGCTCTTTCCTCTATTTGGCAACTGTCATATGTGCGT	FALSE	1.59339	1.49635	1.50573	0.985851	1.03077	1.04372	3.05111	2.44189	3.3231	0.856746	0.716848	0.868959	1.68722	1.65224	1.67822	0.9194	1.05402	1.02891	2.21354	2.28534	2.75557
inducibleMutant_.i2.-2091846685_mm_chr10:105010090$scrCREB5_scrCREB5at-25^scrCREB5_scrCREB5at-6_1	1193	822	560	1921	3989	2074	2288	797	1291	1393	2827	1588	2151	1533	1518	2710	2119	4132	3062	2705	1229	1790	948	2207	1281	3608	CGTGAGCAAGGTTGGGGGAGCGAGAGATACAACCAGCAGCGAGACACAGCTCAAAGTTTACTATCATACACGTCAAAGAGAAAGTTGACTCAGAGTACGCGCGCTCTTTCCTCTATTTGGCAACTGTCATATGTGCGT	FALSE	1.39451	1.44691	1.4262	0.837828	0.896637	0.908071	2.44893	2.74741	3.12147	0.90161	0.70975	0.888748	1.48594	1.44752	1.68132	0.95584	0.831804	0.879008	2.27009	2.43824	2.97119
inducibleMutant_.ip.1873436385_mm_chr10:105010090$scrCREB5_scrCREB5at-6^scrCREB5_scrCREB5at-25_1	883	750	514	644	1067	588	1745	764	1183	1338	1695	871	1202	1369	1246	1897	1772	1471	1058	746	1270	1957	1008	1471	875	1948	CGTGAGCAAGGTTGGGGGAGCGAGAGATACAACCAGCAGCGAGATACAGCTCAAAGTTTACTAAACCCTCAAGGTAAGAGAAAGTTGACTCAGAGTACGCGCGCTCTTTCCTCTATTTGGCAACTGTCATATGTGCGT	FALSE	0.936277	0.888683	0.892448	0.89935	0.920055	0.976705	1.07646	0.963571	1.16035	0.874983	0.849094	1.06958	1.10905	1.10719	1.01651	1.10605	1.01835	1.04661	0.90497	0.943401	0.917573
inducibleMutant_.If.1600871103_mm_chr10:105010090$scrCREB5_scrCREB5at-6^scrCREB5_scrCREB5at-25_1	825	660	343	722	1811	748	1841	730	1270	1371	1968	1183	1498	1490	1109	1854	1519	1944	1356	829	1164	2148	1049	1445	931	2233	CGTGAGCAAGGTTGGGGGAGCGAGAGATACAACCAGCAGCGAGATACAGCTCAAAGTTTACTAAGTATGTGCAGTAAGAGAAAGTTGACTCAGAGTACGCGCGCTCTTTCCTCTATTTGGCAACTGTCATATGTGCGT	FALSE	0.998796	1.109	1.0219	0.789542	0.907507	0.919522	1.1439	1.55017	1.39912	0.77488	0.708239	0.67653	1.00098	1.08238	1.0706	0.931413	1.02697	1.00073	1.09884	1.11093	0.936858
inducibleMutant_.i2.-691428901_mm_chr10:105010090$scrCREB5_scrCREB5at-6^scrCREB5_scrCREB5at-25_1	1080	764	457	1082	1990	920	2587	1093	1802	1986	2729	1375	2122	1623	1494	2430	2353	1877	1790	1137	1620	2680	1360	2119	1240	3028	CGTGAGCAAGGTTGGGGGAGCGAGAGATACAACCAGCAGCGAGATACAGCTCAAAGTTTACTACCATACACGTCGAAGAGAAAGTTGACTCAGAGTACGCGCGCTCTTTCCTCTATTTGGCAACTGTCATATGTGCGT	FALSE	1.27152	1.18336	1.32895	1.08528	1.18214	1.22285	1.21993	1.21219	1.22461	0.721874	0.583427	0.641455	1.34758	1.32349	1.33279	1.19007	1.17632	1.1911	0.974026	1.34632	1.17963
inducible_.chr10:105010090_base_inducible_1	949	639	359	1764	3672	1995	1969	830	1344	1496	2726	1571	2204	1459	1067	1715	1713	4059	2509	2129	1142	1697	948	2498	1299	3713	CGTGAGCAAGGTTGGGGGAGCGAGAGATACAACCAGCAGCGAGATACAGCTCAAAGTTTACTATCATACACGTCAAAGAGAAAGTTGACTCAGAGTACGCGCGCTCTTTCCTCTATTTGGCAACTGTCATATGTGCGT	FALSE	1.41289	1.50402	1.53546	0.916772	0.980791	1.02468	2.61311	2.93881	3.48902	0.833403	0.641128	0.662057	1.76717	1.54231	1.81801	0.933225	0.828585	0.923591	2.34309	2.09923	2.45712
inducibleMutant_.i1.848684014_mm_chr10:105010090$scrCREB5_scrCREB5at-6^scrCREB5_scrCREB5at-25_1	977	860	494	2440	4929	2495	2599	1113	1554	1784	3974	2005	2889	1930	1251	2248	2038	5361	3436	2837	1419	2673	1257	3405	1736	4974	CGTGAGCAAGGTTGGGGGAGCGAGAGATACAACCAGCAGCGAGATACAGCTCAAAGTTTACTATCATAGACGTCAAAGAGAAAGTTGACTCAGAGTACGCGCGCTCTTTCCTCTATTTGGCAACTGTCATATGTGCGT	FALSE	1.55707	1.45107	1.5215	0.929344	0.857287	0.923737	2.73835	2.9886	3.30575	0.650014	0.653705	0.690188	1.82097	1.55815	1.84109	0.876599	0.986625	0.925773	2.33945	2.17325	2.47518
inducibleMutant_.i1.-214731402_mm_chr10:105010090$scrCREB5_scrCREB5at-25^scrCREB5_scrCREB5at-6_1	8350	6373	3855	7802	16546	8150	17842	6643	10119	10604	16671	8758	12526	11037	9622	18367	15271	17358	12348	8696	8370	14499	7260	12781	7381	18605	CGTGAGCAAGGTTGGGGGAGCGAGAGATACAACCAGCAGCGAGATACAGGTCAAAGTTTACTATCATACACGTCAAAGAGAAAGTTGACTCAGAGTACGCGCGCTCTTTCCTCTATTTGGCAACTGTCATATGTGCGT	FALSE	1.14222	1.10837	1.15357	0.969956	0.976156	0.960129	1.27546	1.46138	1.57297	0.80924	0.705652	0.784562	1.19524	1.15846	1.20422	0.90417	0.935831	0.935001	1.32457	1.36571	1.3267
inactive_.chr6:3454464_base_inactive_1	778	699	321	409	710	297	1340	855	1179	1372	1385	688	972	1596	653	1893	1446	814	605	612	878	1670	988	1075	693	1648	CGTGTCATCAAGCATCACCCAAAACATGCCACACACATGAGGGCTGTCTGTGACCCTCTCGAATGCTAATTTAGAAAAACTGCCCAGCTCTCCAATATGCCTCCATAGTCTGCTTTTAAGAACTATTTTTGTTCTCTC	TRUE	0.656228	0.602126	0.619035	0.86332	0.786527	0.859077	0.890275	0.834965	0.763234	1.00394	1.03053	0.869855	0.695213	0.752172	0.737649	0.6559	0.745408	0.879935	0.429553	0.46274	0.64569
inducibleMutant_.ip.-1990131938_mm_chr1:55109510$RFX5_RFX5at-69^RFX5_RFX5at43^CREB5_CREB5at49_1	12792	6475	8298	14820	32763	19147	13274	7737	12801	13407	22078	11850	16828	7521	10358	12000	22690	20328	18568	14558	7111	12319	5899	10717	6438	16007	CGTTGCCATGGCAACGTAAGTGGCAGACTCCTGGCAGGAGCAGAGCGTGTCCCGGAGATCCGCGCCCCGATTGGCTGTCCCGAGGCGGCACTGGACACGTGCGTCAGCCTAGCGTCAGCGTGGCGTCATGGGGTTGGG	FALSE	2.21984	2.20077	2.27425	1.65781	1.81218	1.78142	3.25651	3.88952	4.96713	1.66637	0.963669	2.26996	1.47075	1.48283	1.52041	1.12728	1.16684	1.11488	2.27638	3.01373	3.25935
Synthetic	4476	4651	3215	4051	5885	4421	1377	3291	5534	5905	7040	3858	5654	1680	1263	2507	3138	3483	1966	2148	1738	3308	1431	2813	1645	4528	CGTTGCCATGGCAACGTTATTTTAAGACGTTGCCATGGCAACGTTATTTTAAGACGTTGCCATGGCAACGTTATTTTAAGACGTTGCCATGGCAACGTTATTTTAAGACGTTGCCATGGCAACGTTATTTTAAGACGT	FALSE	3.16885	3.20764	3.42081	3.15687	3.50721	3.51254	8.58092	6.73484	11.0559	5.6207	6.67271	8.478	1.72823	1.69619	1.92541	1.23343	1.40271	1.21076	1.7461	1.42853	2.15293
Synthetic	5029	5773	3998	5435	7261	6122	2327	4405	7490	7978	6122	3495	4988	1565	2307	5121	6875	5391	3230	3883	2162	3179	2080	2584	1488	4367	CGTTGCTAGGCAACGTTATTTTAAGACGTTGCTAGGCAACGTTATTTTAAGACGTTGCTAGGCAACGTTATTTTAAGACGTTGCTAGGCAACGTTATTTTAAGACGTTGCTAGGCAACGTTATTTTAAGACGTTGCTA	FALSE	2.95813	3.11936	3.23962	4.53597	5.09565	5.09437	6.81254	4.91716	9.05948	3.73697	4.90112	6.23868	1.7042	1.64705	1.9934	1.64709	1.44706	1.88919	2.90121	2.51943	4.1779
RFXrandMutant_.If.-626201016_mm_chr8:26496605$RFX5_RFX5at-43^scrRFX5_scrRFX5at-25^scrCREB5_scrCREB5at8^CREB5_CREB5at33_1	1718	1506	683	925	1855	836	2410	1720	2417	2744	3266	1903	2529	2196	1642	4348	2889	2685	1582	1310	2046	4021	1689	2411	1306	3468	CTAATGGCGATAGCCTGTGTTTGTCACAGATAGAACCTTTGTATCCCAGAGTTTTGTTTATTTGTATTCTCTGCAACATTTGTGCAATACGAGAGTTGAGTGAGTGACGACTTTGGAGATAACTTTGTCGACAATGAA	FALSE	1.12466	1.21043	1.17057	1.26222	1.17186	1.24871	1.11952	1.21295	1.19453	1.23265	1.23452	1.02908	1.1332	1.03021	1.12816	1.11083	1.3044	1.09326	1.02976	0.879404	1.00449
RFXrandMutant_.i1.1845029972_mm_chr8:26496605$RFX5_RFX5at-43^scrRFX5_scrRFX5at-25^scrCREB5_scrCREB5at8^CREB5_CREB5at33_1	237	241	105	208	337	112	444	346	539	445	647	366	477	434	220	749	463	583	259	177	489	608	331	514	300	670	CTAATGGCGATAGCCTGTGTTTGTCAGTATATCTTGGAAAGAATCCCAGAGTTTTGTTTATTTGTATTCTCTGCAACATTTGTGCAATACGAGAGTTGAGTGAGTGACGACTTTGGAGATAACTTTGTCGACAATGAA	FALSE	1.12733	1.17794	1.11715	1.28477	1.3223	1.02466	1.36643	1.19608	0.868643	0.922996	1.07232	0.858722	1.22241	1.19743	1.10284	1.34337	0.997985	1.08409	1.13137	0.728491	0.686735
RFXrandMutant_.i1.-1032867389_mm_chr8:26496605$scrCREB5_scrCREB5at8^RFX5_RFX5at-43^scrRFX5_scrRFX5at-25^CREB5_CREB5at33_1	1199	1060	495	935	1337	639	1662	966	1289	1453	1980	1225	1604	1671	1268	2755	1922	1941	1136	902	1212	2055	1043	1528	861	2287	CTAATGGCGATAGCCTGTGTTTGTCAGTCTATCTTGGAAACAATCCCAGAGTTTTGTTTATTTGTATTCTCTGCAACATTTGGGCAATACGAGAGTTGAGTGAGTGACGACTTTGGAGATAACTTTGTCGACAATGAA	FALSE	0.896039	1.02398	0.975686	0.931621	0.821313	0.86896	1.64092	1.2677	1.32396	1.24745	1.25998	1.08149	0.94382	0.892573	0.977722	0.864772	0.876084	0.887227	0.978304	0.829882	0.90894
putativeConstitWgoodRFXsite_.chr8:26496605_base_RFX25_great_tiles_from_constitK27_CBP_peaks_1	1275	1223	686	959	1390	742	2010	1206	1780	2180	2477	1326	1903	1960	1356	3502	2532	2591	1441	1079	1472	2997	1532	1735	1008	2744	CTAATGGCGATAGCCTGTGTTTGTCAGTCTATCTTGGAAACAATCCCAGAGTTTTGTTTATTTGTATTCTCTGCAACATTTGTGCAATACGAGAGTTGAGTGAGTGACGACTTTGGAGATAACTTTGTCGACAATGAA	FALSE	0.95567	0.944973	0.986881	0.991585	0.966933	1.1115	1.39164	1.08977	1.2712	1.09685	1.20204	1.23929	0.913662	0.890884	1.00012	0.895421	1.08928	1.11104	1.11336	0.897475	0.926981
RFXrandMutant_.i1.-72407733_mm_chr8:26496605$CREB5_CREB5at33^RFX5_RFX5at-43^scrRFX5_scrRFX5at-25^scrCREB5_scrCREB5at8_1	2040	1767	927	1280	2279	1140	2810	1919	2838	3073	4454	2382	3190	3308	2149	4942	4148	3411	2097	1593	2747	4485	2245	3150	2026	4757	CTAATGGCGATAGCCTGTGTTTGTCAGTCTATCTTGGAAACAATCCCAGAGTTTTGTTTATTTGTATTCTCTGCAACATTTGTGCAATACGAGAGTTGAGTGAGTGACGGCCTTGGAGATAACTTTGTCGACAATGAA	FALSE	1.01818	1.00579	0.980183	0.934863	0.913439	0.928342	1.32865	1.27806	1.39703	1.25533	1.24228	1.1979	0.98285	1.06094	1.02729	0.990077	0.965845	0.964667	0.868442	0.773833	0.810878
RFXrandMutant_.If.1673640767_mm_chr8:26496605$CREB5_CREB5at33^RFX5_RFX5at-43^scrRFX5_scrRFX5at-25^scrCREB5_scrCREB5at8_1	2112	1721	930	1221	2174	984	2827	1678	2560	2655	3854	2133	2625	2407	1991	5223	3327	3139	1834	1519	2514	3591	2001	2773	1644	3984	CTAATGGCGATAGCCTGTGTTTGTCAGTCTATCTTGGAAACAATCCCAGAGTTTTGTTTATTTGTATTCTCTGCAACATTTGTGCAATACGAGAGTTGAGTGTCACTGCTGAAAGGAGATAACTTTGTCGACAATGAA	FALSE	1.2108	1.23779	1.1085	1.12345	1.13239	1.1023	1.25978	1.21185	1.1986	1.29182	1.20267	1.19455	1.18909	1.18316	1.18241	1.24527	1.0628	1.18167	1.09835	0.930117	1.06264
RFXrandMutant_.If.1745152637_mm_chr8:26496605$scrCREB5_scrCREB5at8^RFX5_RFX5at-43^scrRFX5_scrRFX5at-25^CREB5_CREB5at33_1	1484	1531	795	1432	2338	940	2505	1686	2636	2619	3994	2033	2790	2523	1982	4861	3142	2914	2055	1460	2314	3800	2150	2916	1589	4087	CTAATGGCGATAGCCTGTGTTTGTCAGTCTATCTTGGAAACAATCCCAGAGTTTTGTTTATTTGTATTCTCTGCAACTAAACACGTTATCGAGAGTTGAGTGAGTGACGACTTTGGAGATAACTTTGTCGACAATGAA	FALSE	1.1971	1.12552	1.12401	1.07691	1.1124	1.03736	1.6674	1.47079	1.29219	1.02438	1.20742	1.15241	1.19292	1.091	1.15721	1.09351	1.07294	1.21129	0.972741	0.99428	0.974408
RFXrandMutant_.i1.-1187072891_mm_chr8:26496605$scrRFX5_scrRFX5at-25^RFX5_RFX5at-43^scrCREB5_scrCREB5at8^CREB5_CREB5at33_1	625	525	225	355	504	293	1114	709	1002	1101	1662	997	1285	1393	568	1704	887	1099	498	390	987	1843	839	1176	666	1587	CTAATGGCGATAGCCTGTGTTTGTCAGTCTATCTTGGAAACAATGCCAGAGTTTAGTTTATTTGTATTCTCTGCAACATTTGTGCAATACGAGAGTTGAGTGAGTGACGACTTTGGAGATAACTTTGTCGACAATGAA	FALSE	0.902232	0.999715	0.937635	0.820226	0.765859	0.789854	0.929499	0.712952	0.905709	0.970128	0.931031	0.733405	0.871362	0.828209	0.813863	0.844776	0.942507	0.856126	0.664464	0.436408	0.471432
RFXrandMutant_.If.795121954_mm_chr8:26496605$scrRFX5_scrRFX5at-25^RFX5_RFX5at-43^scrCREB5_scrCREB5at8^CREB5_CREB5at33_1	410	344	123	305	427	190	690	628	861	1025	1030	574	776	586	332	1129	661	578	331	275	992	1616	663	867	505	1263	CTAATGGCGATAGCCTGTGTTTGTCAGTCTATCTTGGAAACAATGGGTCTCAAAACAAATTTTGTATTCTCTGCAACATTTGTGCAATACGAGAGTTGAGTGAGTGACGACTTTGGAGATAACTTTGTCGACAATGAA	FALSE	1.32916	1.36819	1.346	1.72703	1.56436	1.74798	1.28931	0.9752	0.948224	1.02747	0.984916	0.647295	1.52709	1.49283	1.53968	2.01832	1.96451	1.60821	0.830721	0.689516	0.790206
activeMutant_.i2.-1251718410_mm_chr14:30781530$RFX5_RFX5at-37^scrRFX5_scrRFX5at-68^RFX5_RFX5at-19_1	405	467	357	343	596	412	587	297	513	482	582	258	420	305	454	1406	1085	781	568	507	550	825	384	412	202	519	CTAGACGTCATATCCGGTCTCCTGACTCAGGCACTATCCACGCCATCGGAAGTTACTTGTGTGACTGGGCGGAACCTCTAGTCAGGAGTGGTCTCCCAGCAGCCAATGGGCTCGACCCACCTCTAGCCTGACTTGGGT	FALSE	1.44298	1.18155	1.39969	1.56926	1.79081	1.57928	1.70436	1.60001	2.41694	1.19303	1.5717	2.20839	1.39425	1.14728	1.21561	2.15	1.92692	1.78961	2.15663	2.27333	2.79907
activeMutant_.i1.62613852_mm_chr14:30781530$RFX5_RFX5at-37^scrRFX5_scrRFX5at-68^RFX5_RFX5at-19_1	302	408	214	155	383	303	482	297	547	508	544	326	452	348	382	767	862	471	343	328	492	878	415	556	265	691	CTAGACGTCATATCCGGTCTCCTGACTCAGGCAGAATCCACGCCAGGGGAAGTTACTTGTGTGACTGGGCGGAACCTCTAGTCAGGAGTGGTCTCCCAGCAGCCAATGGGCTCGACCCACCTCTAGCCTGACTTGGGT	FALSE	1.18211	1.30849	1.3202	1.37536	1.67356	1.4588	0.937973	1.25218	2.16472	1.08341	1.67226	1.61218	1.64907	1.31912	1.41848	1.68563	1.79732	1.6951	1.1399	1.20318	1.58708
activeMutant_.i2.899681212_mm_chr14:30781530$RFX5_RFX5at-19^scrRFX5_scrRFX5at-68^RFX5_RFX5at-37_1	2383	2541	1657	1221	2788	1799	2969	1756	2560	2793	2752	1543	2010	1316	2652	5566	5161	3558	2803	2270	2317	3622	2068	1908	1322	2969	CTAGACGTCATATCCGGTCTCCTGACTCAGGCAGTATCCACGCCAGCGGAACTTACTTGTGTGTCTGGGCGGAACCTCTAGTCAGGAGTGGTCTCCCAGCAGCCAATGGGCTCGACCCACCTCTAGCCTGACTTGGGT	FALSE	1.58136	1.63773	1.55247	2.15034	2.07117	2.12093	1.19953	1.47978	2.08654	1.38787	1.69077	2.02656	1.49646	1.74017	1.61168	2.09916	1.96066	2.23368	2.27706	2.60005	2.90453
activeMutant_.i1.1486559004_mm_chr14:30781530$RFX5_RFX5at-19^scrRFX5_scrRFX5at-68^RFX5_RFX5at-37_1	998	1071	670	472	1038	595	1025	425	770	764	742	405	545	455	1055	2277	1992	1472	1022	790	627	905	559	534	359	733	CTAGACGTCATATCCGGTCTCCTGACTCAGGCAGTATCCACGCCAGCGGAAGATACTTGTGTGAGTGGGCGGAACCTCTAGTCAGGAGTGGTCTCCCAGCAGCCAATGGGCTCGACCCACCTCTAGCCTGACTTGGGT	FALSE	1.23319	1.2433	1.21749	1.50528	1.80182	1.678	1.34315	1.59584	1.99894	1.68361	2.06422	2.37354	1.21136	1.36678	1.15085	1.64298	1.41693	1.74633	2.72472	2.74191	2.92362
active_.chr14:30781530_base_active_1	7181	7461	4713	4197	8710	5737	8349	5161	8466	8991	7813	4275	5492	3940	6942	16741	14813	10570	8505	6208	7393	11282	6516	5879	3591	7700	CTAGACGTCATATCCGGTCTCCTGACTCAGGCAGTATCCACGCCAGCGGAAGTTACTTGTGTGACTGGGCGGAACCTCTAGTCAGGAGTGGTCTCCCAGCAGCCAATGGGCTCGACCCACCTCTAGCCTGACTTGGGT	FALSE	1.49955	1.51556	1.41683	2.11094	2.28778	2.28046	1.46626	1.64399	2.36623	1.48725	1.76544	2.04979	1.5401	1.57883	1.39611	2.23718	2.03986	2.35078	2.25945	2.63507	2.65314
activeMutant_.ip.-31156367_mm_chr14:30781530$RFX5_RFX5at-19^scrRFX5_scrRFX5at-68^RFX5_RFX5at-37_1	5379	6139	3768	4861	7918	5571	5052	4634	7502	8003	7151	4136	5323	3095	4970	10133	8604	7081	5875	4292	3679	6877	3302	4165	2551	5761	CTAGACGTCATATCCGGTCTCCTGACTCAGGCAGTATCCACGCCAGCGGACGTTGCCATGGCAACGGGGCGGAACCTCTAGTCAGGAGTGGTCTCCCAGCAGCCAATGGGCTCGACCCACCTCTAGCCTGACTTGGGT	FALSE	1.74721	1.8666	1.74815	2.41287	2.58077	2.58406	2.80652	2.46983	3.79731	1.84108	2.40062	2.70828	1.38898	1.4278	1.32973	1.41724	1.58288	1.5165	1.9269	2.31719	2.33509
activeMutant_.If.-1360277719_mm_chr14:30781530$RFX5_RFX5at-19^scrRFX5_scrRFX5at-68^RFX5_RFX5at-37_1	4313	4374	2653	2897	5095	3027	6496	3231	5319	5467	6761	3576	4723	3790	4771	10209	9328	6962	4915	4074	4873	7778	4027	4982	3001	6604	CTAGACGTCATATCCGGTCTCCTGACTCAGGCAGTATCCACGCCAGCGGATCAATGAACACACTGAGGGCGGAACCTCTAGTCAGGAGTGGTCTCCCAGCAGCCAATGGGCTCGACCCACCTCTAGCCTGACTTGGGT	FALSE	1.34899	1.31792	1.26666	1.37384	1.49425	1.44152	1.30079	1.23598	1.60462	1.14807	1.33022	1.48299	1.35677	1.37165	1.24478	1.53297	1.46197	1.51032	1.5471	1.58306	1.81004
activeMutant_.ip.581043952_mm_chr14:30781530$RFX5_RFX5at-37^scrRFX5_scrRFX5at-68^RFX5_RFX5at-19_1	10777	12376	7405	7327	13628	7851	11580	7527	11429	12249	13029	7448	9804	7344	8996	19442	17538	11873	10110	7162	6719	10842	5523	7629	4818	11340	CTAGACGTCATATCCGGTCTCCTGACTCAGGCCGTTGCCATGGCAACGGAAGTTACTTGTGTGACTGGGCGGAACCTCTAGTCAGGAGTGGTCTCCCAGCAGCCAATGGGCTCGACCCACCTCTAGCCTGACTTGGGT	FALSE	1.34158	1.41657	1.35691	1.65169	1.65694	1.66678	1.84554	1.85455	2.33465	1.60925	2.11136	2.322	1.0722	1.13645	1.10308	1.09081	1.05169	1.06898	1.36161	1.68048	1.64213
activeMutant_.If.23823419_mm_chr14:30781530$RFX5_RFX5at-37^scrRFX5_scrRFX5at-68^RFX5_RFX5at-19_1	10862	10664	6298	6780	14197	7880	16336	6836	10058	10959	13570	7459	10469	10278	12692	25621	22777	18008	14811	10168	8474	14562	7559	10439	6030	14374	CTAGACGTCATATCCGGTCTCCTGACTCAGGCTCATAGGTGCGGTCGCGAAGTTACTTGTGTGACTGGGCGGAACCTCTAGTCAGGAGTGGTCTCCCAGCAGCCAATGGGCTCGACCCACCTCTAGCCTGACTTGGGT	FALSE	0.998411	1.01369	1.03533	1.07185	1.04192	1.06555	1.21057	1.36951	1.66107	1.14974	1.28963	1.39992	1.04832	1.01631	0.999067	0.983005	1.00931	1.0454	1.47564	1.7591	1.66584
activeMutant_.i2.-543164757_mm_chr14:30781530$scrRFX5_scrRFX5at-68^RFX5_RFX5at-37^RFX5_RFX5at-19_1	4481	4977	2848	2494	5205	2914	6451	2390	3313	4105	4946	2611	3245	3692	5392	10833	8873	6515	4904	3618	3100	4996	2551	3454	2034	5100	CTAGTCGTCATACCCGGTCTCCTGACTCAGGCAGTATCCACGCCAGCGGAAGTTACTTGTGTGACTGGGCGGAACCTCTAGTCAGGAGTGGTCTCCCAGCAGCCAATGGGCTCGACCCACCTCTAGCCTGACTTGGGT	FALSE	1.01305	0.987819	0.893377	1.04322	0.955415	1.11112	1.12765	1.27148	1.5555	1.20111	1.52416	1.6031	0.965613	0.954347	0.986811	1.0011	0.963987	0.982145	1.4862	1.62145	1.65011
RFXgreatMutant_.If.1491046741_mm_chr11:47945487$CREB5_CREB5at3^RFX5_RFX5at-6^CREB5_CREB5at12^scrRFX5_scrRFX5at16^scrCREB5_scrCREB5at32_1	136	166	53	83	230	51	339	257	361	374	614	290	423	395	130	411	233	259	152	120	267	470	204	456	235	561	CTCATCTTCTTTTTCCCAAGAAGCCCAAAAAACTAGCAGGTGTGAGTAGTGAGAGAAAAGGCTGGTTTCCTTCCGTTGCAGTTAGCCATCATCAGACTCAGTCTAGCATAACACAGCATTTACCCCCCCCCCAAGCCC	FALSE	1.17546	1.02549	1.08849	1.04852	0.973067	0.946205	0.714141	1.06916	0.518056	0.693703	0.967383	0.567705	1.19154	1.03059	1.01459	0.805916	0.847639	0.734108	0.552239	0.469743	0.511552
RFXgreatMutant_.i1.83564656_mm_chr11:47945487$CREB5_CREB5at3^RFX5_RFX5at-6^CREB5_CREB5at12^scrRFX5_scrRFX5at16^scrCREB5_scrCREB5at32_1	131	136	50	70	141	39	206	146	257	244	385	172	249	313	101	293	119	123	56	41	208	298	144	209	90	297	CTCATCTTCTTTTTCCCAAGAAGCCCAAAAAACTAGCAGGTGTGAGTAGTGAGAGAAAAGGCTGGTTTCCTTGGCAACGGCCATGCCATCATCAGACTCAGTCTAGCATAACACAGCATTTACCCCCCCCCCAAGCCC	FALSE	0.930153	0.767567	0.808606	0.751704	0.874221	0.779034	0.991143	1.07862	0.651934	1.09961	1.30425	0.881352	0.689198	0.498098	0.677856	0.792309	0.678238	0.65395	0.330968	0.218403	0.220569
RFXgreatMutant_.i1.-1056554906_mm_chr11:47945487$CREB5_CREB5at12^RFX5_RFX5at-6^CREB5_CREB5at3^scrRFX5_scrRFX5at16^scrCREB5_scrCREB5at32_1	162	234	94	106	193	47	188	192	281	311	479	237	358	259	152	438	203	250	98	77	283	530	201	361	184	540	CTCATCTTCTTTTTCCCAAGAAGCCCAAAAAACTAGCAGGTGTGAGTAGTGAGAGAAAAGGCTGGTTTCCTTGGCAACGTCAATGCCAGCCTCAGACTCAGTCTAGCATAACACAGCATTTACCCCCCCCCCAAGCCC	FALSE	1.39854	1.27815	1.40496	1.19465	1.15515	1.19997	1.64457	1.61776	0.860887	1.49002	2.45894	1.81558	1.43863	1.23065	1.48943	1.30275	1.45776	1.10312	0.812952	0.461892	0.500606
RFXgreatMutant_.If.2022378893_mm_chr11:47945487$scrCREB5_scrCREB5at32^RFX5_RFX5at-6^CREB5_CREB5at3^CREB5_CREB5at12^scrRFX5_scrRFX5at16_1	204	289	108	140	212	136	322	333	531	463	509	290	374	528	166	415	289	186	167	84	459	778	305	400	228	542	CTCATCTTCTTTTTCCCAAGAAGCCCAAAAAACTAGCAGGTGTGAGTAGTGAGAGAAAAGGCTGGTTTCCTTGGCAACGTCAATGCCATCATCAGACTCAGAGATCGTATTGTCAGCATTTACCCCCCCCCCAAGCCC	FALSE	0.728991	0.767178	0.719979	1.01636	1.07076	0.87631	1.26817	1.03752	1.45442	1.09549	1.77309	1.21791	0.781931	0.748028	0.733316	1.03646	1.04968	0.821093	0.296691	0.386097	0.267886
RFXgreatMutant_.i1.-1470626264_mm_chr11:47945487$scrCREB5_scrCREB5at32^RFX5_RFX5at-6^CREB5_CREB5at3^CREB5_CREB5at12^scrRFX5_scrRFX5at16_1	221	236	118	120	295	129	348	182	279	317	416	186	259	380	294	581	347	334	171	134	160	426	249	282	149	475	CTCATCTTCTTTTTCCCAAGAAGCCCAAAAAACTAGCAGGTGTGAGTAGTGAGAGAAAAGGCTGGTTTCCTTGGCAACGTCAATGCCATCATCAGACTCAGTCTAGGACAACACAGCATTTACCCCCCCCCCAAGCCC	FALSE	0.827843	0.683694	0.692784	0.771838	0.781723	0.833655	1.00579	1.33585	1.27649	1.09811	1.33975	1.23126	0.765963	0.679234	0.892967	0.50201	0.798613	0.931413	0.740266	0.549322	0.593781
RFXgreatMutant_.If.-350316383_mm_chr11:47945487$scrRFX5_scrRFX5at16^RFX5_RFX5at-6^CREB5_CREB5at3^CREB5_CREB5at12^scrCREB5_scrCREB5at32_1	184	215	80	71	207	49	223	198	347	369	418	220	341	336	128	474	149	237	75	80	229	357	190	288	162	471	CTCATCTTCTTTTTCCCAAGAAGCCCAAAAAACTAGCAGGTGTGAGTAGTGAGAGAAAAGGCTGGTTTCCTTGGCAACGTCAATGGGTAGTAGTCTGAGTCTCTAGCATAACACAGCATTTACCCCCCCCCCAAGCCC	FALSE	0.940752	0.914567	1.03157	0.949652	1.09957	1.09748	0.928665	1.46278	0.756654	1.42675	1.90469	1.30266	0.884699	0.835204	1.0014	0.812591	0.756901	0.803787	0.594065	0.272481	0.400918
inactive_.chr6:3454564_base_inactive_1	8671	8379	4385	4642	8438	3970	13455	6462	9239	9950	13184	7257	10170	10753	8140	18255	14252	10830	7103	5523	8700	14514	7358	10283	5877	14388	CTCCATAGTCTGCTTTTAAGAACTATTTTTGTTCTCTCCTCCCACCGTGCATGGCTGAGTGTGAATAGCTGTTTCCTGGGTCCTCACTGCCAAGGTAATGGCACTCTATCCCATCTCATCACTTTCAAGTTCACCTCT	TRUE	0.927162	0.94267	0.961332	0.968447	0.914803	0.924707	1.0063	0.988258	1.01605	1.11435	1.23026	1.1834	0.987035	0.946767	0.955865	0.96464	0.961541	0.972651	0.848249	0.806355	0.86487
inducibleMutant_.ip.-1455453882_mm_chr2:220174220$CREB5_CREB5at-8_1	104	84	64	282	482	327	115	61	113	162	307	181	273	124	184	264	193	773	414	421	109	156	111	266	124	465	CTCCCTACGAGGCGGGGTCTACATGCCCCTCTCGCTGCAACGCGGCCAACCGCAGGCGGGTAATGACGTCACCTCCACCCCCGGCTCGTAAGCTAATTTGCGTCACATATGGCGTAAGAGCCCTGTCGGAGCGGGGGA	FALSE	1.87221	2.03887	2.23781	0.792769	0.970263	1.30558	7.15248	6.60486	9.79166	1.56376	1.44302	2.02082	2.21413	1.73228	2.6789	1.04805	0.896217	1.27241	5.25028	4.07561	5.71697
inducibleMutant_.If.-1287079473_mm_chr2:220174220$CREB5_CREB5at-8_1	336	307	195	305	580	223	553	120	182	189	241	186	184	229	406	677	570	693	380	331	186	312	102	194	116	316	CTCCCTACGAGGCGGGGTCTACATGCCCCTCTCGCTGCAACGCGGCCAACCGCAGGCGGGTCGACTGCTGTGGTCCACCCCCGGCTCGTAAGCTAATTTGCGTCACATATGGCGTAAGAGCCCTGTCGGAGCGGGGGA	FALSE	0.795829	1.13451	0.816703	0.84447	0.846191	0.824778	1.60872	1.65279	1.38863	1.05063	1.09674	1.28043	0.874397	0.877484	0.985774	0.968396	0.970576	0.633128	2.54872	2.02564	2.43387
inducibleMutant_.i2.-404926094_mm_chr2:220174220$CREB5_CREB5at-8_1	449	106	164	570	852	445	515	227	388	430	617	355	439	457	448	336	943	1175	754	613	481	444	318	581	260	816	CTCCCTACGAGGCGGGGTCTACATGCCCCTCTCGCTGCAACGCGGCCAACCGCAGGCGGGTGCGGCCGACACCTCCACCCCCGGCTCGTAAGCTAATTTGCGTCACATATGGCGTAAGAGCCCTGTCGGAGCGGGGGA	FALSE	1.02096	1.08504	0.976406	0.800476	0.903958	0.940292	3.2283	2.60704	2.97549	1.50756	0.40662	1.15633	1.31221	0.98554	1.27556	1.25489	0.692113	0.989094	2.16544	2.01405	2.25865
inducible_.chr2:220174220_base_inducible_1	652	453	277	1557	2326	1413	884	311	599	632	1337	733	1115	617	644	1112	884	3147	1967	2059	520	825	461	1228	666	1900	CTCCCTACGAGGCGGGGTCTACATGCCCCTCTCGCTGCAACGCGGCCAACCGCAGGCGGGTGCTGACGACACCTCCACCCCCGGCTCGTAAGCTAATTTGCGTCACATATGGCGTAAGAGCCCTGTCGGAGCGGGGGA	FALSE	1.63864	1.6594	1.83684	0.812295	1.03365	1.02363	5.13738	4.14641	5.50422	1.27535	1.01236	1.13782	2.05426	1.86985	2.19985	1.00483	0.952531	1.06204	4.29572	3.89165	5.61923
inducibleMutant_.i1.-2017727563_mm_chr2:220174220$CREB5_CREB5at-8_1	493	157	193	396	651	379	401	32	84	59	91	37	56	98	405	395	377	534	473	482	61	100	53	70	28	114	CTCCCTACGAGGCGGGGTCTACATGCCCCTCTCGCTGCAACGCGGCCAACCGCAGGCGGGTGCTGACGGCCCCTCCACCCCCGGCTCGTAAGCTAATTTGCGTCACATATGGCGTAAGAGCCCTGTCGGAGCGGGGGA	FALSE	0.702188	0.527361	0.580823	0.526214	0.912611	0.60164	2.88042	2.5583	3.25463	2.12587	0.773473	1.74767	0.737249	0.494936	0.831006	0.742129	0.726916	0.768735	4.58923	5.89182	8.28183
activeMutant_.ip.920851632_mm_chr11:51076635$scrCREB5_scrCREB5at-64^RFX5_RFX5at21_1	7021	4331	3823	3742	5556	3340	5327	2654	4246	4598	4429	2706	3328	2890	6876	8464	13392	7943	5530	4312	4510	6898	3918	3123	1978	4562	CTCGTAACCCTCAAGGTTCTGTGGGCGGGCACGAGGCTTCGTGACGCATGCGCGCTGGCTCGGCGTAGGTGGCGCTGGAGCCACCTGAGGAGGTTGTAGGGTGACGGCGCGGACGCCATTTTGTCGGTGTCTGTCGCA	FALSE	1.1589	1.30786	1.17049	1.47993	1.56428	1.58994	2.04893	1.64359	2.15909	2.27903	1.60618	2.60596	1.11536	1.18562	1.12767	1.86061	1.70034	1.92705	2.31479	2.33583	2.51239
activeMutant_.i1.-1430534745_mm_chr11:51076635$scrCREB5_scrCREB5at-64^RFX5_RFX5at21_1	7654	999	4574	3754	7758	3345	5161	2627	3776	4147	3756	2043	2856	2888	7980	3165	14924	9114	7069	4879	3954	6495	3254	2829	1544	3942	CTCGTCCCCTGGCACGATCTGTGGGCGGGCACGAGGCTTCGTGACGCATGCGCGCTGGCTCGGCGTAGGTGGCGCTGGAGCCACCTGAGGAGGTTGTAGGGTGACGGCGCGGACGCCATTTTGTCGGTGTCTGTCGCA	FALSE	0.983482	0.988106	1.00518	1.46589	1.39209	1.43499	2.12161	2.36881	2.23187	2.56442	0.382403	3.21817	1.01106	0.926119	0.975091	1.63236	1.60211	1.60157	2.65789	2.98796	2.84472
activeMutant_.i2.-1806007735_mm_chr11:51076635$RFX5_RFX5at21^scrCREB5_scrCREB5at-64_1	9876	1963	6559	4239	10630	5061	7703	4980	7497	8013	6160	3363	4507	3350	11745	5850	20645	12879	9383	7152	7168	11552	6472	4625	2877	6416	CTCGTCCCCTTGCACGATCTGTGGGCGGGCACGAGGCTTCGTGACGCATGCGCGCTGGCTCGGCGTAGGTGGCGCTGGAGCCACCTGAGGACGTTGTAGGGTGTCGGCGCGGACGCCATTTTGTCGGTGTCTGTCGCA	FALSE	1.39051	1.40221	1.36749	2.39565	2.38273	2.39035	1.60513	2.17464	2.26247	2.21695	0.503443	3.09189	1.42498	1.48769	1.36819	2.55111	2.45653	2.74613	3.23789	3.41909	3.59491
activeMutant_.i1.1675534012_mm_chr11:51076635$RFX5_RFX5at21^scrCREB5_scrCREB5at-64_1	4456	2276	2834	2579	4158	2623	4061	2068	3075	3496	2830	1603	2175	1831	5060	5225	9003	5923	4958	3156	3003	4833	2710	2419	1424	3117	CTCGTCCCCTTGCACGATCTGTGGGCGGGCACGAGGCTTCGTGACGCATGCGCGCTGGCTCGGCGTAGGTGGCGCTGGAGCCACCTGAGGAGATTGTAGGGTGAGGGCGCGGACGCCATTTTGTCGGTGTCTGTCGCA	FALSE	1.16879	1.22286	1.2074	1.82012	1.78809	1.90807	1.85235	1.61349	2.22419	1.89735	1.10721	2.53404	1.36361	1.34722	1.21611	1.95543	1.88035	2.10382	2.72445	3.30546	2.90238
active_.chr11:51076635_base_active_1	13522	3384	8016	6713	13318	6961	11147	4361	6658	7293	6332	3800	4521	3951	14032	9173	26913	18827	12254	8650	6751	11223	5904	4846	2926	6401	CTCGTCCCCTTGCACGATCTGTGGGCGGGCACGAGGCTTCGTGACGCATGCGCGCTGGCTCGGCGTAGGTGGCGCTGGAGCCACCTGAGGAGGTTGTAGGGTGACGGCGCGGACGCCATTTTGTCGGTGTCTGTCGCA	FALSE	1.21191	1.34341	1.16308	1.77876	1.79419	1.84463	1.75657	1.88276	2.1504	2.09757	0.599739	2.61124	1.26596	1.28287	1.15735	2.03721	2.02354	2.12406	4.01327	3.78604	3.6865
activeMutant_.ip.318346861_mm_chr11:51076635$RFX5_RFX5at21^scrCREB5_scrCREB5at-64_1	15412	565	8869	8489	17671	4436	5212	10454	15990	17740	10254	5578	7454	4718	13867	1762	25291	14433	10198	8749	9005	13879	7648	5940	3556	8572	CTCGTCCCCTTGCACGATCTGTGGGCGGGCACGAGGCTTCGTGACGCATGCGCGCTGGCTCGGCGTAGGTGGCGCTGGAGCCACCTGAGGCGTTGCCATGGCAACGGCGCGGACGCCATTTTGTCGGTGTCTGTCGCA	FALSE	1.64351	1.6514	1.60588	3.57078	3.60847	3.75756	4.7507	5.34283	2.93085	5.11315	0.214158	6.17898	1.29948	1.30563	1.29793	2.27563	2.09561	2.30418	2.57646	2.63859	3.12252
activeMutant_.If.105843689_mm_chr11:51076635$RFX5_RFX5at21^scrCREB5_scrCREB5at-64_1	9744	1639	6059	5359	10943	5120	8860	4838	7231	8080	8177	4517	5706	4233	11364	5331	22112	14131	10053	7310	7240	11838	6585	5762	3258	7747	CTCGTCCCCTTGCACGATCTGTGGGCGGGCACGAGGCTTCGTGACGCATGCGCGCTGGCTCGGCGTAGGTGGCGCTGGAGCCACCTGAGGTCCAACATCCCACTGCGCGCGGACGCCATTTTGTCGGTGTCTGTCGCA	FALSE	1.46078	1.49051	1.37014	1.84186	1.81879	1.90754	1.76423	1.94633	1.98995	1.90168	0.365456	2.48321	1.40497	1.33327	1.30741	2.03923	1.99223	2.21123	2.81157	2.89909	2.90787
activeMutant_.i2.1502124724_mm_chr11:51076635$scrCREB5_scrCREB5at-64^RFX5_RFX5at21_1	5722	794	3351	2418	4869	2398	3643	1679	2425	2578	2217	1245	1746	1954	5914	2594	11263	7025	5125	3911	2501	4460	2193	1835	1093	2428	CTCGTCCCCTTGCACGGTCTGTGGGCGGGCACGAGGCTTCGTGACGCATGCGCGCTGGCTCGGCGTAGGTGGCGCTGGAGCCACCTGAGGAGGTTGTAGGGTGACGGCGCGGACGCCATTTTGTCGGTGTCTGTCGCA	FALSE	0.857984	0.889973	0.908242	1.38473	1.32136	1.31847	1.93599	2.10618	2.26671	2.71596	0.430577	3.34012	0.96929	0.968975	0.887666	1.52604	1.626	1.59529	3.02793	3.20172	3.3703
inducibleMutant_.If.-452012876_mm_chr5:32000915$scrRFX5_scrRFX5at-52^CREB5_CREB5at-14^scrCREB5_scrCREB5at10_1	14088	14590	7103	8528	19344	8089	26086	6659	10524	11172	16243	8822	11963	10133	15521	34898	26322	22040	16375	11015	9238	14957	7569	11966	7017	16417	CTCGTGCGCCATATGACCACCTGCACTACGTCGAGGAGGCCACCCCTTTCCGTTCCATGACGTCAACGGGGGCACATGTTTCCGTGTTTGTCATCCTCTCCTAATTGCGAGAGCCTAGATGGTGCTTTATACGTCTTT	FALSE	1.21218	1.21608	1.20001	1.05903	1.1058	1.1018	0.953554	1.16857	1.06781	0.933848	1.10494	0.988737	1.21886	1.19958	1.15739	1.08697	1.05152	1.06176	1.83189	1.97268	1.83042
inducibleMutant_.ip.-1992167672_mm_chr5:32000915$scrRFX5_scrRFX5at-52^CREB5_CREB5at-14^scrCREB5_scrCREB5at10_1	6442	6299	3266	3620	8127	3724	10626	3136	4521	5359	7230	3894	5214	5040	7063	16155	13288	10042	7026	5156	4633	8041	4061	5456	3319	7927	CTCGTGCGCCATATGACCCGAGAGTGATGCTCCAGGAGGCCACCCCTTTCCGTTCCATGACGTCAACGGGGGCACATGTTTCCGTGTTTGTCATCCTCTCCTAATTGCGAGAGCCTAGATGGTGCTTTATACGTCTTT	FALSE	1.08479	1.07919	1.05153	1.00273	0.955073	1.06259	0.993675	1.20524	1.20683	1.0483	1.17109	1.11607	1.11734	1.14076	1.12358	1.09599	1.13655	1.14533	1.67809	1.70173	1.72261
inducibleMutant_.i1.-213589647_mm_chr5:32000915$scrRFX5_scrRFX5at-52^CREB5_CREB5at-14^scrCREB5_scrCREB5at10_1	10518	10506	5413	10713	22844	10857	16038	3753	5566	5972	13859	7032	9497	5240	11317	24490	18190	22803	17381	12071	5208	8584	4460	10054	6420	13884	CTCGTGCGCCATATGACGTGGACGTGAAGCAGCAGGAGGCCACCCCTTTCCGTTCCATGACGTCAACGGGGGCACATGTTTCCGTGTTTGTCATCCTCTCCTAATTGCGAGAGCCTAGATGGTGCTTTATACGTCTTT	FALSE	2.00004	1.87448	1.8422	1.15421	1.13095	1.13894	1.94835	2.24459	2.33113	1.13401	1.29413	1.22556	1.98039	2.12237	1.89282	1.18499	1.16699	1.20985	3.6651	4.04909	3.87898
inducibleMutant_.ip.-1919567164_mm_chr5:32000915$CREB5_CREB5at-14^scrRFX5_scrRFX5at-52^scrCREB5_scrCREB5at10_1	20904	21899	12383	24192	46110	25602	27929	7300	11311	12573	31853	16284	22802	9718	22426	49053	39507	47965	38417	28046	9830	16440	8501	22717	14012	33317	CTCGTGCGCCATATGACGTGGACGTGATGCAGCAGGAGGCCACCCCTTTCCGTTCAATGACGTCACCGGGGGCACATGTTTCCGTGTTTGTCATCCTCTCCTAATTGCGAGAGCCTAGATGGTGCTTTATACGTCTTT	FALSE	2.47863	2.34054	2.38494	1.21056	1.23924	1.29292	2.52652	2.60168	3.15664	1.29422	1.54903	1.60997	2.41277	2.4977	2.44915	1.20601	1.20513	1.24343	4.15693	4.82571	4.85959
inducibleMutant_.i2.-157415751_mm_chr5:32000915$CREB5_CREB5at-14^scrRFX5_scrRFX5at-52^scrCREB5_scrCREB5at10_1	13901	12447	7364	7581	16001	7827	24947	5948	8604	9887	11935	6468	8820	8494	14388	30919	27484	17227	13813	9368	8419	14156	7325	8815	5047	12841	CTCGTGCGCCATATGACGTGGACGTGATGCAGCAGGAGGCCACCCCTTTCCGTTCCAGGCCGTCAACGGGGGCACATGTTTCCGTGTTTGTCATCCTCTCCTAATTGCGAGAGCCTAGATGGTGCTTTATACGTCTTT	FALSE	1.06255	1.06363	1.05545	1.12849	1.0785	1.16322	0.886367	1.01075	1.0804	0.963523	0.985681	1.07187	1.07116	1.02929	1.07997	1.18175	1.18724	1.22581	1.70813	1.98513	1.85712
inducibleMutant_.i1.673858735_mm_chr5:32000915$CREB5_CREB5at-14^scrRFX5_scrRFX5at-52^scrCREB5_scrCREB5at10_1	12568	13527	6338	7474	14975	7911	22101	5630	8276	8780	11307	6122	8394	7348	12820	29334	20908	17366	12746	8939	7692	11690	6213	7972	4639	11348	CTCGTGCGCCATATGACGTGGACGTGATGCAGCAGGAGGCCACCCCTTTCCGTTCCATGACGGCCACGGGGGCACATGTTTCCGTGTTTGTCATCCTCTCCTAATTGCGAGAGCCTAGATGGTGCTTTATACGTCTTT	FALSE	1.16363	1.16374	1.16113	1.23475	1.19918	1.19409	0.986386	1.06775	1.23261	0.983306	1.20915	1.04133	1.1198	1.09363	1.10325	1.24809	1.13333	1.20187	1.99047	2.11748	2.04845
inducibleMutant_.ip.287211945_mm_chr5:32000915$scrCREB5_scrCREB5at10^scrRFX5_scrRFX5at-52^CREB5_CREB5at-14_1	3638	3746	1729	1982	4393	2133	5124	1455	2231	2187	3111	1674	2251	2161	3815	8092	6648	5496	4031	2826	1862	3321	1593	2253	1372	3274	CTCGTGCGCCATATGACGTGGACGTGATGCAGCAGGAGGCCACCCCTTTCCGTTCCATGACGTCAACGGGGGCACATGTAACCCTCAAGGTCATCCTCTCCTAATTGCGAGAGCCTAGATGGTGCTTTATACGTCTTT	FALSE	1.08864	1.08201	1.05877	1.08504	1.0992	1.01136	1.12824	1.35104	1.43347	1.22769	1.44427	1.22527	1.07609	1.09981	1.0823	1.02731	1.09477	1.04782	2.14199	2.27705	2.20203
inducibleMutant_.If.-904709359_mm_chr5:32000915$scrCREB5_scrCREB5at10^scrRFX5_scrRFX5at-52^CREB5_CREB5at-14_1	1140	1114	617	930	1762	955	1719	443	761	797	1129	655	954	706	1316	2944	2366	1878	1423	1138	520	887	446	751	480	1314	CTCGTGCGCCATATGACGTGGACGTGATGCAGCAGGAGGCCACCCCTTTCCGTTCCATGACGTCAACGGGGGCACATGTAAGGCACAAACACATCCTCTCCTAATTGCGAGAGCCTAGATGGTGCTTTATACGTCTTT	FALSE	1.20928	1.29589	1.37349	1.0112	1.14766	1.12814	1.57802	1.61527	1.91308	1.14674	1.28026	1.30333	1.09794	1.17775	1.32959	0.878161	0.895013	0.89796	2.24035	2.46045	2.71421
inducibleMutant_.i2.1125699360_mm_chr5:32000915$scrCREB5_scrCREB5at10^scrRFX5_scrRFX5at-52^CREB5_CREB5at-14_1	12082	11947	6502	14070	26583	15673	17570	4077	6532	6771	13910	7653	10275	6371	12433	27341	22026	24761	20855	14906	5564	9484	4710	10068	5886	14305	CTCGTGCGCCATATGACGTGGACGTGATGCAGCAGGAGGCCACCCCTTTCCGTTCCATGACGTCAACGGGGGCACATGTCTCCGTGTTTGGCATCCTCTCCTAATTGCGAGAGCCTAGATGGTGCTTTATACGTCTTT	FALSE	1.65104	1.67786	1.63929	1.03127	1.09162	1.06208	2.33576	2.38422	3.07176	1.18905	1.34331	1.34376	1.63109	1.6004	1.60401	1.04125	1.06046	1.05085	3.2733	3.99592	3.93966
inducibleMutant_.i1.-273813022_mm_chr5:32000915$scrCREB5_scrCREB5at10^scrRFX5_scrRFX5at-52^CREB5_CREB5at-14_1	22256	22468	12473	23383	46669	26230	33046	9071	13985	15399	39482	19779	28165	12391	23557	50238	43642	49706	39342	28872	12686	21071	10848	28693	17385	41770	CTCGTGCGCCATATGACGTGGACGTGATGCAGCAGGAGGCCACCCCTTTCCGTTCCATGACGTCAACGGGGGCACATGTTTCCGGGCTTGTCATCCTCTCCTAATTGCGAGAGCCTAGATGGTGCTTTATACGTCTTT	FALSE	2.40952	2.22962	2.31039	1.17974	1.20168	1.24193	2.06389	2.22548	2.73329	1.16456	1.34318	1.37056	2.39008	2.43044	2.40815	1.22066	1.2114	1.24443	3.37853	3.87583	3.92352
inducible_.chr5:32000915_base_inducible_1	21519	21713	11521	28492	57162	31444	31811	6436	10198	10893	33410	17608	24362	9777	22587	48974	38968	57482	45431	34047	8608	14458	7534	25692	15255	36454	CTCGTGCGCCATATGACGTGGACGTGATGCAGCAGGAGGCCACCCCTTTCCGTTCCATGACGTCAACGGGGGCACATGTTTCCGTGTTTGTCATCCTCTCCTAATTGCGAGAGCCTAGATGGTGCTTTATACGTCTTT	FALSE	2.5841	2.51557	2.53273	1.06084	1.11056	1.1134	2.61247	2.83168	3.40382	1.16971	1.34844	1.3151	2.71228	2.70286	2.66358	1.04972	1.05345	1.09533	4.95166	5.67232	5.86379
inducibleMutant_.If.-670775260_mm_chr5:32000915$CREB5_CREB5at-14^scrRFX5_scrRFX5at-52^scrCREB5_scrCREB5at10_1	16012	15594	9040	8480	18058	8691	19714	6609	9754	11101	14038	7510	9887	8583	16147	39252	29921	19700	14583	10935	9263	14748	7417	9544	5666	13565	CTCGTGCGCCATATGACGTGGACGTGATGCAGCAGGAGGCCACCCCTTTCCGTTCGTACTGCAGTTGGGGGGCACATGTTTCCGTGTTTGTCATCCTCTCCTAATTGCGAGAGCCTAGATGGTGCTTTATACGTCTTT	FALSE	1.23681	1.22217	1.17087	1.2409	1.20997	1.29251	1.25466	1.44348	1.5181	1.40445	1.56269	1.6651	1.14771	1.14355	1.12903	1.28673	1.22406	1.22833	1.93309	2.07406	2.14529
inducibleMutant_.i2.45391835_mm_chr5:32000915$scrRFX5_scrRFX5at-52^CREB5_CREB5at-14^scrCREB5_scrCREB5at10_1	16586	17260	9876	18377	37310	20035	27922	6207	9472	10020	22121	11446	15703	8606	17304	37771	32903	36949	32282	22255	8295	14314	7315	17418	10160	22964	CTCGTGCGCCATATGACGTGTACGTGATCCAGCAGGAGGCCACCCCTTTCCGTTCCATGACGTCAACGGGGGCACATGTTTCCGTGTTTGTCATCCTCTCCTAATTGCGAGAGCCTAGATGGTGCTTTATACGTCTTT	FALSE	1.94376	1.85774	1.85466	1.1623	1.17185	1.16353	1.9197	2.10569	2.47087	1.02714	1.22119	1.28434	2.089	2.04508	1.90621	1.14919	1.18487	1.2082	3.61598	4.57903	4.35443
activeMutant_.If.2063840810_mm_chr11:51076635$scrCREB5_scrCREB5at-64^RFX5_RFX5at21_1	4049	1103	2597	1993	3961	2114	3982	2591	3599	3848	3204	1753	2458	2238	4807	3059	8537	5481	4020	3193	3931	5931	3123	2404	1419	3483	CTCGTGGGGAACGTGCTTCTGTGGGCGGGCACGAGGCTTCGTGACGCATGCGCGCTGGCTCGGCGTAGGTGGCGCTGGAGCCACCTGAGGAGGTTGTAGGGTGACGGCGCGGACGCCATTTTGTCGGTGTCTGTCGCA	FALSE	1.08261	1.09409	1.11636	1.86572	1.7122	1.71825	1.45986	1.56754	1.82814	1.75825	0.547223	2.36819	1.10871	1.09835	1.11178	2.0942	1.8879	1.98353	2.06265	2.1927	2.40239
activeMutant_.If.1030422204_mm_chr1:108068130$RFX5_RFX5at48^CREB5_CREB5at46_1	1602	1344	837	1045	1818	854	3420	3032	4492	4547	5734	3019	4352	3730	1774	3581	3651	2175	1755	1222	3872	6121	3294	4402	2481	5868	CTCTCCTCTATGGCGAGGACAAACCTCCTGGGAAACAGCTCCGCCCCACCCCCGTACGCACGCGTCACGTTTGTTTACCCTGAGGCCCCGCCCCCAGCCTCCCGCTCTCCGCAGAAAACAGCAGTACGATTGCATGCA	FALSE	1.16248	1.13054	1.18594	1.30996	1.28222	1.21822	0.891242	0.837688	0.85988	0.809973	0.77636	0.888681	1.2181	1.15222	1.12385	1.23766	1.16903	1.25528	0.491106	0.574358	0.551655
activeMutant_.ip.1184656182_mm_chr1:108068130$RFX5_RFX5at48^CREB5_CREB5at46_1	1121	849	620	578	1286	672	1724	1431	2332	2459	2326	1295	1726	1532	768	1863	1919	1462	1013	714	1321	2454	1241	1612	994	2229	CTCTCCTCTATGGCGAGGACAAACCTCCTGGGAAACAGCTCCGCCCCACCCCCGTACGCACGCGTCACGTTTGTTTACCCTGAGGCCCCGCCCCCAGCCTCCCGCTCTCCGCAGAAACGTTGCCATGGCAACGATGCA	FALSE	1.14812	1.18071	1.14515	1.50529	1.6207	1.60402	0.977904	1.17549	1.34226	1.12435	0.972882	1.30587	1.08605	1.12394	1.03939	1.02806	1.14111	1.15144	0.803736	0.80717	0.784774
activeMutant_.i2.-1560464588_mm_chr1:108068130$CREB5_CREB5at46^RFX5_RFX5at48_1	794	689	377	461	961	492	1660	1226	1970	2169	2704	1404	1916	1667	977	1671	1825	1180	850	615	1602	2728	1535	1917	1085	2660	CTCTCCTCTATGGCGAGGACAAACCTCCTGGGAAACAGCTCCGCCCCACCCCCGTACGCACGCGTCACGTTTGTTTACCCTGAGGCCCCGCCCCCAGCCTCCCGCTCTCCGCAGAAAGGCCGTCATGCTAACGATGCA	FALSE	1.22662	1.17642	1.16827	1.18521	1.25824	1.30027	0.810025	0.912284	1.02062	0.827079	0.819976	0.824669	1.18694	1.12749	1.13991	1.14578	1.16579	1.30888	0.596171	0.62244	0.621219
activeMutant_.i2.104932259_mm_chr1:108068130$RFX5_RFX5at48^CREB5_CREB5at46_1	1284	1272	842	804	2066	931	3155	2377	3382	3785	4605	2538	3431	3188	1739	2974	3003	2029	1764	1259	2933	5017	2775	3150	1982	4605	CTCTCCTCTATGGCGAGGACAAACCTCCTGGGAAACAGCTCCGCCCCACCCCCGTACGCACGCGTCACGTTTGTTTACCCTGAGGCCCCGCCCCCAGCCTCCCGCTCTCCGCAGAAATCTCGTCATGCTATCGATGCA	FALSE	1.09232	1.112	1.09392	1.20157	1.1295	1.18647	0.743297	1.03192	1.01615	0.70372	0.796485	0.969079	1.01985	1.07697	1.0319	1.09691	1.12108	1.23729	0.536029	0.675452	0.664986
activeMutant_.ip.-1242373326_mm_chr1:108068130$CREB5_CREB5at46^RFX5_RFX5at48_1	489	467	306	374	714	327	742	593	1079	1183	1433	712	1022	663	553	1051	1077	515	536	383	1052	1513	836	1017	669	1410	CTCTCCTCTATGGCGAGGACAAACCTCCTGGGAAACAGCTCCGCCCCACCCCCGTACGCACGCGTCACGTTTGTTTACCCTGAGGCCCCGCCCCCAGCCTCCCGCTCTCCGCAGAAATGACGTCACCCTAACGATGCA	FALSE	1.63445	1.50003	1.56682	1.44138	1.73277	1.78313	1.47019	1.51638	1.51757	1.13957	1.24338	1.49749	1.58325	1.74795	1.51926	1.89181	1.62568	1.79234	0.654212	0.986883	0.972726
activeMutant_.i1.2131088451_mm_chr1:108068130$RFX5_RFX5at48^CREB5_CREB5at46_1	531	512	314	291	811	438	785	427	786	924	1067	591	853	796	508	1134	1067	881	651	442	696	1219	650	854	506	1208	CTCTCCTCTATGGCGAGGACAAACCTCCTGGGAAACAGCTCCGCCCCACCCCCGTACGCACGCGTCACGTTTGTTTACCCTGAGGCCCCGCCCCCAGCCTCCCGCTCTCCGCAGAAATGACGTCATGCTAAGGATGCA	FALSE	1.01365	1.03707	1.08923	0.864477	1.05134	1.16003	1.08126	1.62804	1.92137	1.16966	1.28852	1.45247	1.10736	1.10117	1.08413	1.04249	1.09094	1.16072	0.932154	0.998348	0.935006
activeMutant_.i1.1046837117_mm_chr1:108068130$CREB5_CREB5at46^RFX5_RFX5at48_1	973	931	583	548	1012	554	1829	873	1491	1420	1876	879	1240	1481	1090	1870	2301	1085	994	670	1218	2025	959	1269	754	1764	CTCTCCTCTATGGCGAGGACAAACCTCCTGGGAAACAGCTCCGCCCCACCCCCGTACGCACGCGTCACGTTTGTTTACCCTGAGGCCCCGCCCCCAGCCTCCCGCTCTCCGCAGAAATGTCGGCCTGCTAACGATGCA	FALSE	0.957891	0.829022	0.851037	0.949944	1.0719	0.958173	0.873922	0.87193	1.04304	0.919885	1.0056	1.15745	0.8844	0.881928	0.850882	0.980546	0.974048	0.920429	0.61702	0.819305	0.761772
active_.chr1:108068130_base_active_1	134	101	59	115	248	126	244	180	321	323	491	239	364	194	157	302	330	309	201	132	274	438	214	309	182	448	CTCTCCTCTATGGCGAGGACAAACCTCCTGGGAAACAGCTCCGCCCCACCCCCGTACGCACGCGTCACGTTTGTTTACCCTGAGGCCCCGCCCCCAGCCTCCCGCTCTCCGCAGAAATGTCGTCATGCTAACGATGCA	FALSE	1.91389	1.72079	1.90714	1.49523	1.76172	1.66384	1.37472	1.60168	1.77823	0.949619	0.817752	0.878029	1.64399	1.62512	1.64969	1.68393	1.60836	1.56797	1.34147	1.26476	1.14572
[truncated: 462 more rows]
[truncated: 16 more columns]

## Sheet: KEY
Column Name	Description
label	Full label
Un1_E	cDNA read counts, enhancer assay, unstimulated condition, biorep1
Un2_E	cDNA read counts, enhancer assay, unstimulated condition, biorep2
Un3_E	cDNA read counts, enhancer assay, unstimulated condition, biorep3
KCl1_E	cDNA read counts, enhancer assay, stimulated conditioned, biorep1
KCl2_E	cDNA read counts, enhancer assay, stimulated conditioned, biorep2
KCl3_E	cDNA read counts, enhancer assay, stimulated conditioned, biorep3
[truncated: 59 more rows]
